# Supplementary material for: Off-target effects of the lysosomal acid lipase inhibitors Lalistat-1 and Lalistat-2 on neutral lipid hydrolases
Source: Mol Metab. 2022 Apr 30;61:101510. doi: 10.1016/j.molmet.2022.101510 (PMC9118473; doi:10.1016/j.molmet.2022.101510)
Supplement: Multimedia component 1 [file mmc1.pdf]

## **Supplemental information**

### **Off-target effects of the lysosomal acid lipase inhibitors Lalistat-1 and Lalistat-2 on neutral lipid hydrolases**

**Ivan Bradić, Katharina B. Kuentzel, Sophie Honeder, Gernot F. Grabner, Nemanja Vujić, Robert Zimmermann, Ruth Birner-Gruenberger, and Dagmar Kratky**

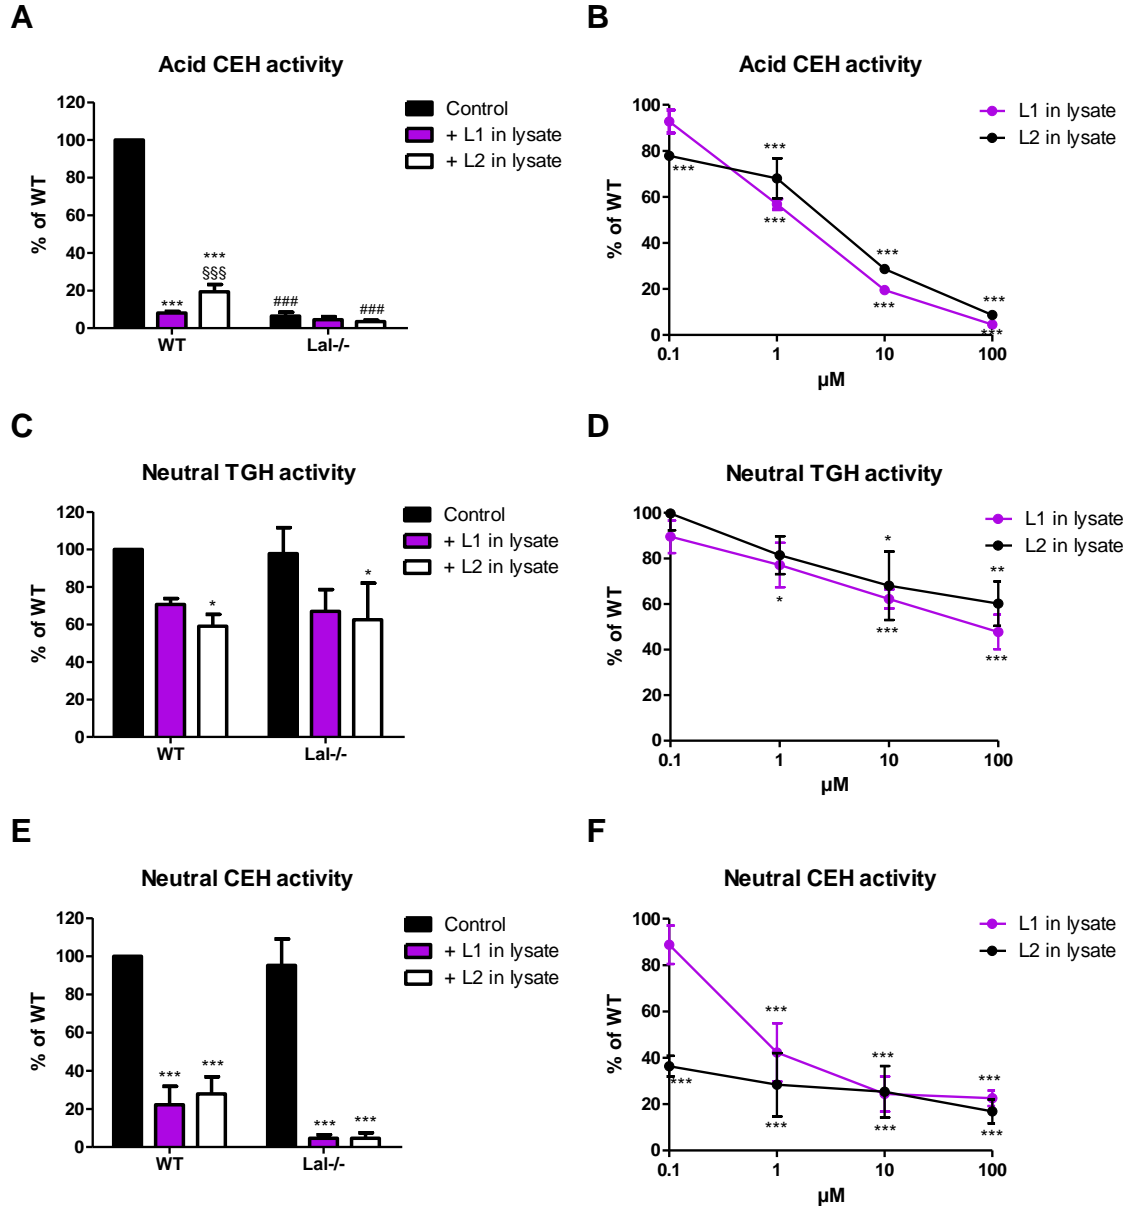

**Figure S1: Lalistat-1 (L1) and L2 inhibit neutral lipid hydrolases in lysates of bone-marrow derived macrophages (BMDM).** Bone marrow from WT and Lal<sup>-/-</sup> mice was differentiated to macrophages (BMDM) for 6 days. (A) Acid (pH 4.5) cholesteryl ester hydrolase (CEH), (C) neutral (pH 7) triglyceride hydrolase (TGH), and (E) neutral CEH activities in lysates of BMDM treated with 30 μM L1, L2, or 0.02% DMSO (control). Dose-dependent inhibition of L1 and L2 on (B) acid CEH, (D) neutral TGH, and (F) neutral CEH activity. Data (n = 3) represent mean ± SD. Lipid hydrolase activities were compared to untreated WT BMDM (arbitrarily set to 100%) and graphs represent the remaining hydrolase activity upon inhibitor treatment. Statistically significant differences were calculated by 1-way ANOVA followed by Bonferroni post-hoc test. \* p < 0.05, \*\* p ≤ 0.01, \*\*\* p ≤ 0.001 for control versus L1 or L2 treatment within the same genotype; ### p ≤ 0.001 for comparing the same treatment between different genotypes; §§§ p ≤ 0.001 for L1 versus L2 treatment within the same genotype.

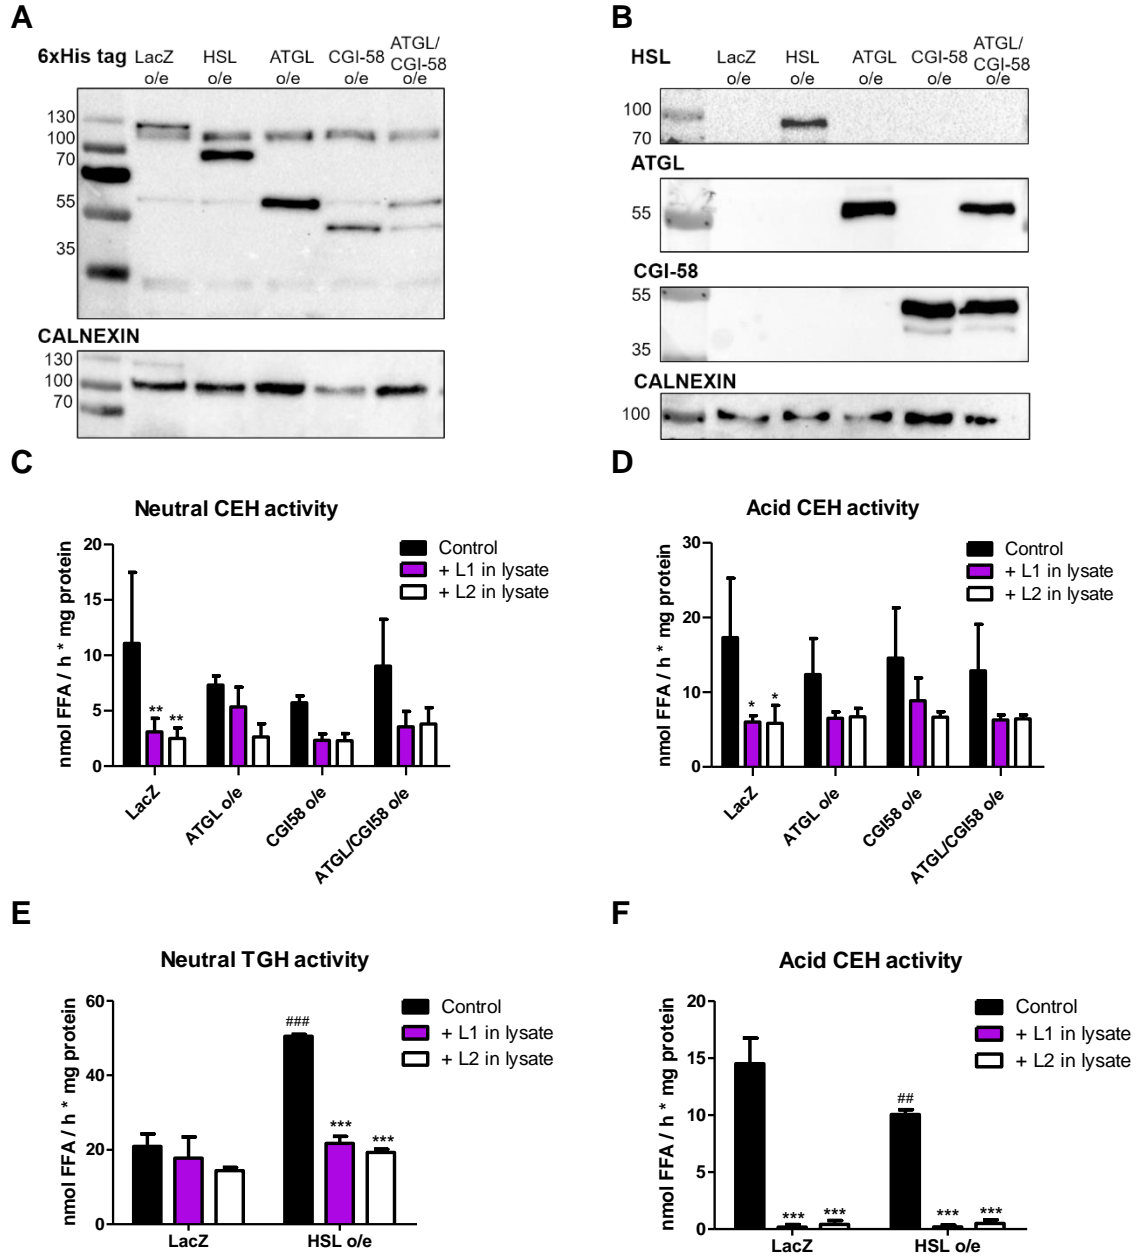

**Figure S2: Lalistat-1 (L1) and L2 inhibit HSL.** Mouse ATGL, HSL, and CGI-58 were cloned into a His-tagged pcDNA4/HisMax expression vector, and recombinant proteins were expressed in COS-7 cells.  $\beta$ -galactosidase (LacZ) was used as a control. His-tagged proteins were detected with (A) a monoclonal anti-His antibody or (B) HSL, ATGL, and CGI-58 antibodies in Western blotting experiments of cell extracts (25  $\mu$ g protein). (C) Neutral cholesteryl ester hydrolase (CEH) and (D) acid CEH activity in lysates of COS7 cells overexpressing (o/e) ATGL, CGI-58, and ATGL/CGI-58 assayed in the presence of 30  $\mu$ M L1 or L2. (E) Neutral (pH 7) triglyceride hydrolase (TGH) and (F) acid (pH 4.5) CEH activity of HSL o/e cell lysates. Data (n = 3) represent mean + SD. Statistically significant differences were calculated by 1-way ANOVA followed by Bonferroni post-hoc test; \* p < 0.05, \*\* p  $\leq$  0.01 for control versus L1 or L2 treatment within the same genotype; ### p  $\leq$  0.01 for comparing the same treatment within different genotypes.

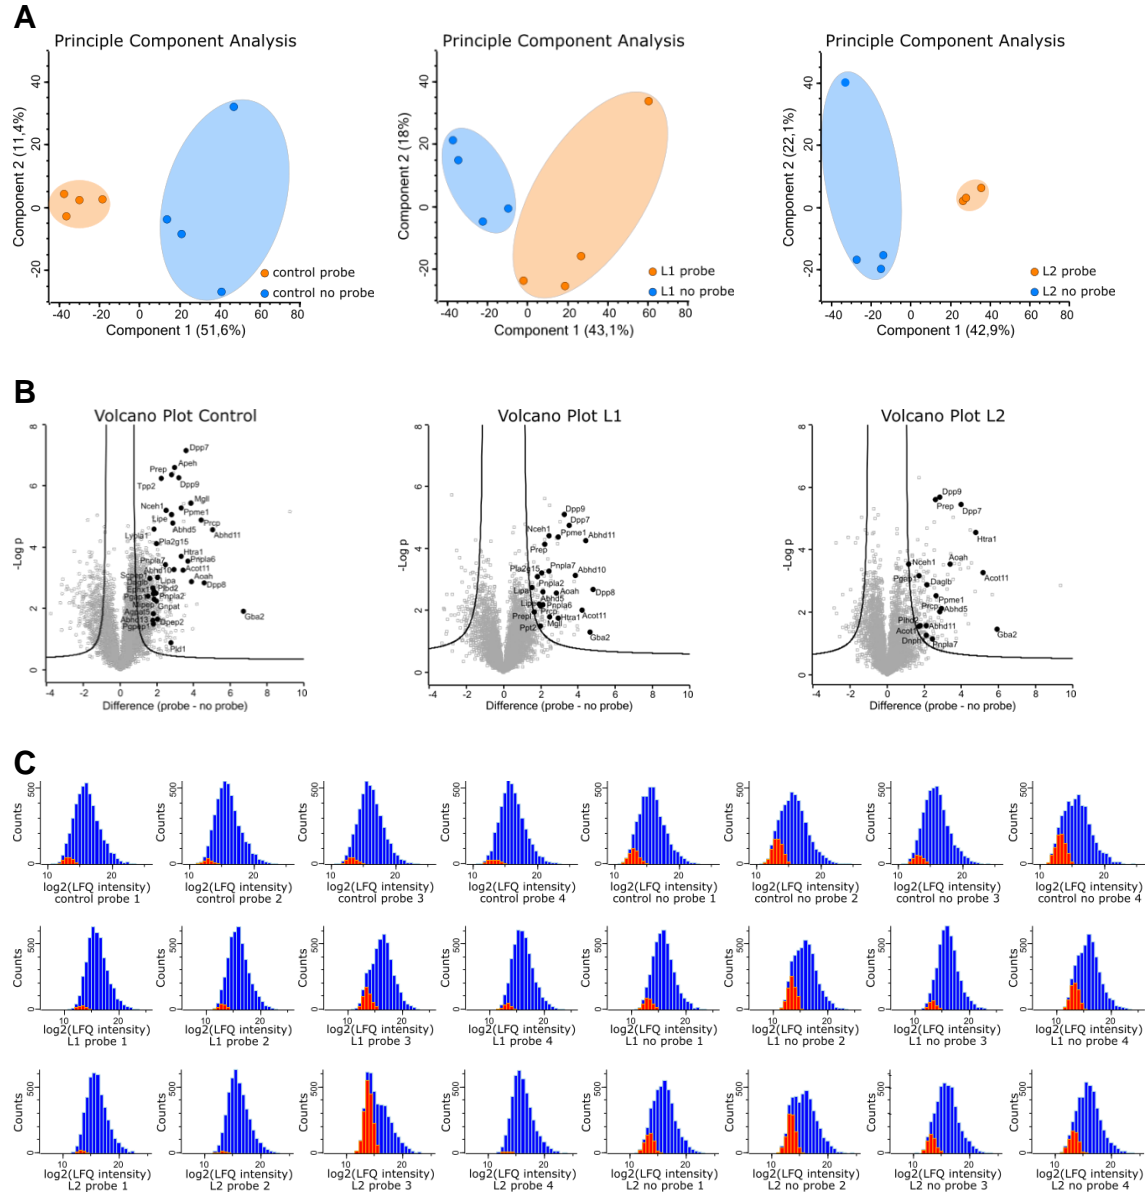

**Figure S3: Activity-based proteomic profiling identified and quantitated serine hydrolases targeted by Lalistat-1 (L1) and L2.** Bone marrow-derived macrophages were incubated with (probe) or without (no probe) ABP C6 and with 30  $\mu$ M L1, L2 or 0.02% DMSO (control) ( $n = 4$ ). Subsequent enrichment and label-free quantitation by mass spectrometry-based proteomics revealed (A) clustering of samples based on ABP C6 treatment, seen in principle component analysis based on protein abundance and (B) a number of significantly enriched serine hydrolases in the volcano plots. Statistical significance was determined by t-tests with permutation-based multiple testing correction; proteins that passed the significance threshold of the statistical tests are located outside the black lines on the volcano plot and serine hydrolases with a fold change  $> 3$  are marked in black together with the corresponding gene names. (C) Histograms of log<sub>2</sub> (LFQ intensity) visualize normal distribution of proteomics data (bars in red color represent imputed data).

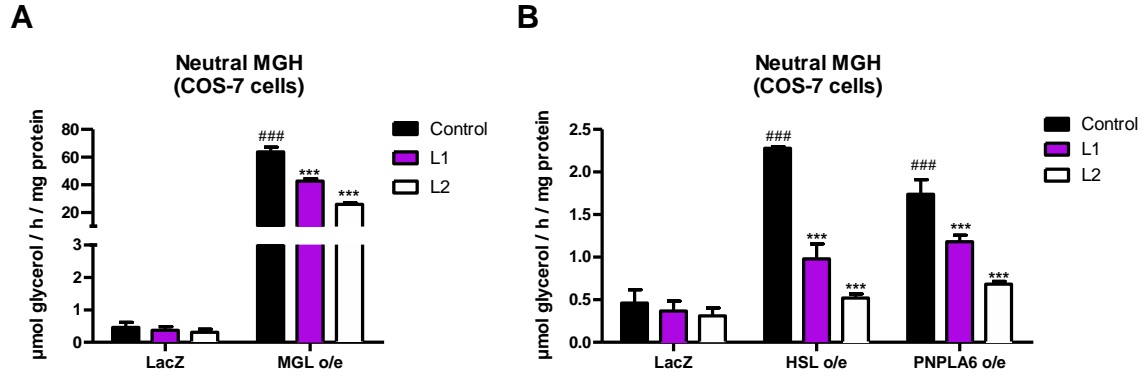

**Figure S4: Lalistat-1 (L1) and L2 inhibit MGL and PNPLA6.** Mouse MGL, HSL, and PNPLA6 were cloned into a His-tagged pcDNA4/HisMax expression vector, and recombinant proteins were expressed in COS-7 cells.  $\beta$ -galactosidase (LacZ) was used as a control. Neutral (pH 7) monoglyceride hydrolase (MGH) activity of COS7 cells overexpressing (o/e) (A) MGL, (B) HSL, and PNPLA6 assayed in the presence of 30  $\mu$ M L1 or L2. Data (n = 3) represent mean + SD. Statistically significant differences were calculated by 1-way ANOVA followed by Bonferroni post-hoc test; \*\*\*  $p \leq 0.001$  for control versus L1 or L2 treatment within the same genotype; ###  $p \leq 0.001$  for comparing the same treatment between different genotypes.

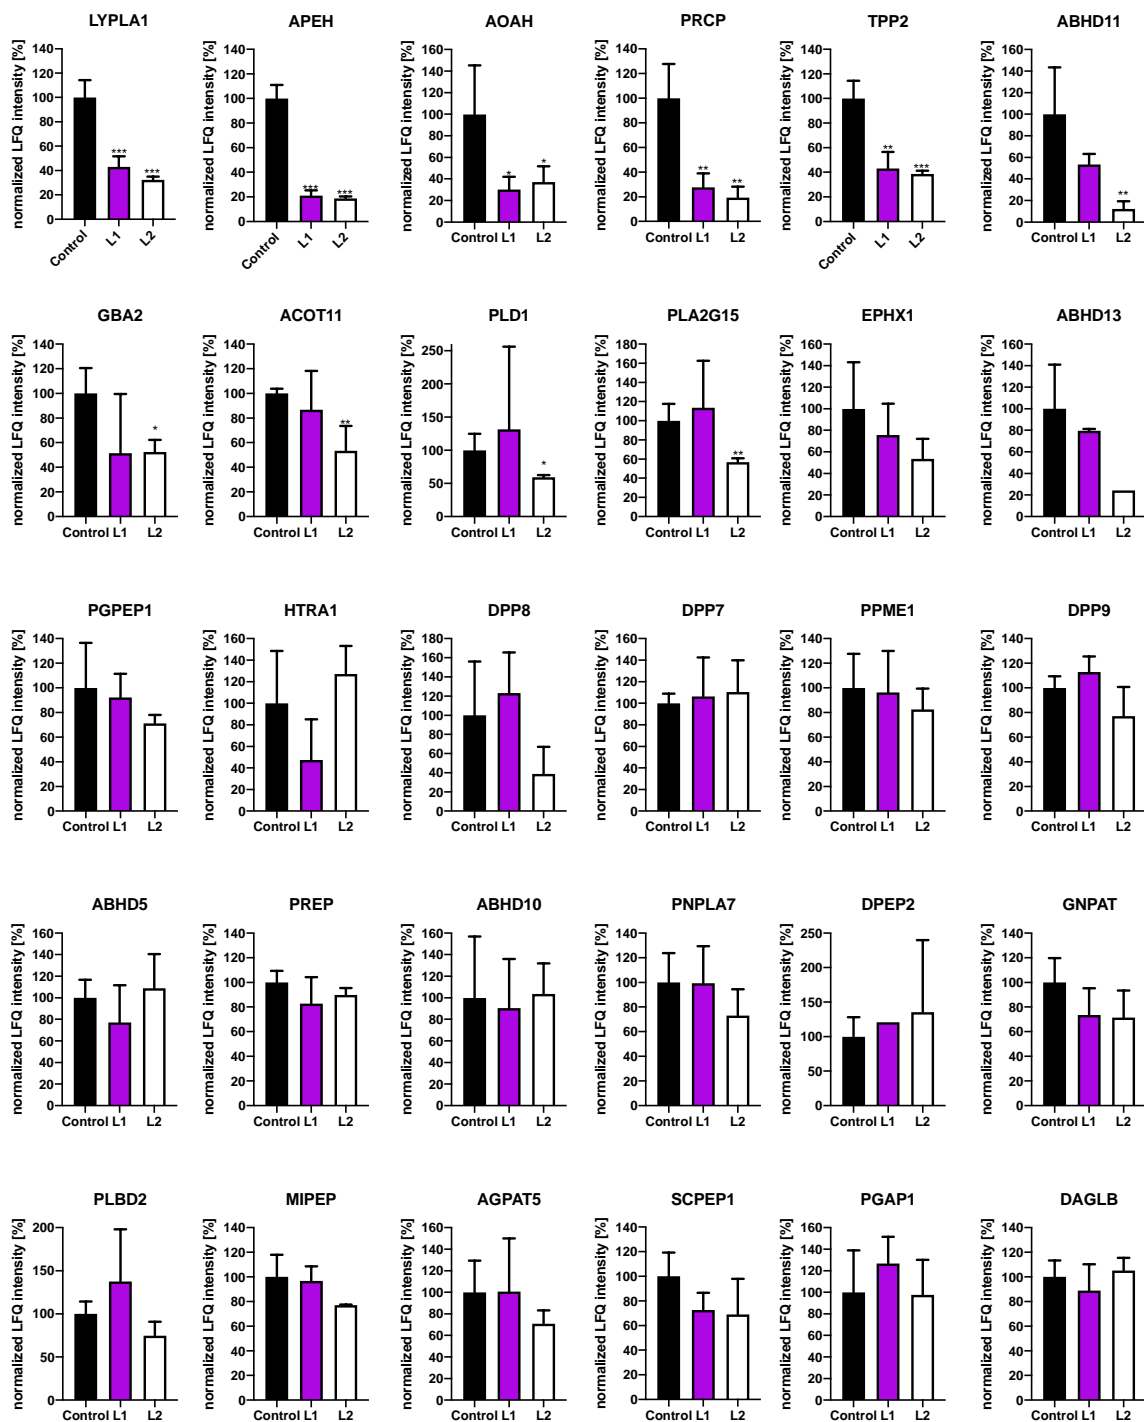

**Figure S5: Lalistat-1 (L1) and L2 reduce activity-based probe binding of several serine hydrolases.** Bone marrow-derived macrophages were treated with 30  $\mu$ M L1, L2 or 0.02% DMSO (Control) for 20 h and labeled with the ABP C6 probe to enrich active serine hydrolases for activity-based proteomic profiling (ABPP). LFQ intensity values (representing probe binding in ABPP experiments) derived from label-free quantitation of MS data were normalized to control (arbitrarily set to 100%). Data (n = 4) represent mean + SD. Statistically significant differences were calculated by two-tailed Student's t-test; \*  $p < 0.05$ , \*\*  $p \leq 0.01$ , \*\*\*  $\leq 0.001$  for control versus L1 or L2 treatment.

**Table S1: Primers used for RT-qPCR**

| Gene          | Forward Sequence 5' – 3' | Reverse Sequence 5' – 3'   |
|---------------|--------------------------|----------------------------|
| <i>Lal</i>    | GGATGAGTTCTGGGCCTTCAG    | AAACCTATGGTGCAGCCTTGAG     |
| <i>Atgl</i>   | GCCACTCACATCTACGGAGC     | GACAGCCACGGATGGTGTTC       |
| <i>Hsl</i>    | GATTTACGCACGATGACACAGT   | ACCTGCAAAGACATTAGACAGC     |
| <i>Fabp4</i>  | AAGGTGAAGAGCATCATAACCCT  | TCACGCCTTTCATAACACATTCC    |
| <i>Cd36</i>   | GCAGGTCTATCTACGCTGTG     | GGTTGTCTGGATTCTGGAGG       |
| <i>Fasn</i>   | GAAGCCGAACACCTCTGTGCAGT  | GCTCCTTGCTGCCATCTGTATTG    |
| <i>Scd1</i>   | CCGGAGACCCCTTAGATCGA     | TAGCCTGTAAAAGATTTCTGCAAACC |
| <i>Hmgcr</i>  | TGTTACCGGCAACAACAAGA     | CCGCGTTATCGTCAGGATGA       |
| <i>Srebf1</i> | CACTCAGCAGCCACCATCTAGCCT | GCTGATGCCTGCAGTCTTCACG     |
| <i>Srebf2</i> | TGAAGGACTTAGTCATGGGCAC   | CGCAGCTTGTGATTGACCT        |
| <i>Dgat1</i>  | TCCGCCTCTGGGCATTC        | GAATCGGCCCAACAATCCA        |
| <i>Dgat2</i>  | AGTGGCAATGCTATCATCATCGT  | TCTTCTGGACCCATCGGCCCCAGGA  |
| <i>Gpat1</i>  | ACAGTTGGCACAATAGAGGTTT   | CCTTCCATTTTCAAGTGTTCAGA    |
| <i>Agpat2</i> | CAGCCAGGTTCTACGCCAAG     | TGATGCTCATGTTATCCACGGT     |
| <i>Agpat3</i> | CTGCTTGCCTACCTGAAGACC    | GATACGGCGGTATAGGTGCTT      |
| <i>Pparg</i>  | GGAAGACCACTCGCATTCTT     | GTAATCAGCAACCATTGGGTCA     |

**list of proteins in CONTROL samples:**

log2 transformed LFQ intensity values (after removal of contaminants), missing values imputation from normal distribution (shift: 1.6; width: 0.4)  
statistical test: two-sided t-test with a p-value of 0.05 and a0 of 1 and permutation-based FDR of 5 % (250 randomizations with multi-testing correction)

| log2 transformed LFQ intensity values |                    |                              |                   |             |                                                                  |            |      |          |                         |                 |                       |                                      |                              |                   |         |        |           |             | probe |       |       |       | no probe |       |       |       |       |
|---------------------------------------|--------------------|------------------------------|-------------------|-------------|------------------------------------------------------------------|------------|------|----------|-------------------------|-----------------|-----------------------|--------------------------------------|------------------------------|-------------------|---------|--------|-----------|-------------|-------|-------|-------|-------|----------|-------|-------|-------|-------|
| Significant                           | neg. log(-p-value) | Difference (log2(p)-log2(n)) | fold change (avg) | Protein IDs | Protein names                                                    | Gene names | id   | Peptides | Razor + unique peptides | Unique peptides | Sequence coverage [%] | Unique + razor sequence coverage [%] | Unique sequence coverage [%] | Mol. weight [kDa] | Q-value | Score  | Intensity | MS/MS count | C+1   | C+2   | C+3   | C+4   | C-1      | C-2   | C-3   | C-4   |       |
|                                       |                    |                              |                   |             |                                                                  |            |      |          |                         |                 |                       |                                      |                              |                   |         |        |           |             | C+1   | C+2   | C+3   | C+4   | C-1      | C-2   | C-3   | C-4   |       |
| +                                     | 5.168              | 9.25                         | 607.51            | P35492      | Histidine ammonia-lyase                                          | Hal        | 1022 | 44       | 44                      | 44              | 68                    | 68                                   | 68                           | 72.257            | 0.0000  | 323.31 | 148750000 | 393         | 20.17 | 19.75 | 19.75 | 19.94 | 12.32    | 10.00 | 10.88 | 9.42  |       |
| +                                     | 1.898              | 6.72                         | 105.44            | Q69Z-F3     | Non-lysosomal glucosylceramidase                                 | Gba2       | 2482 | 3        | 3                       | 3               | 4.9                   | 4.9                                  | 4.9                          | 103.29            | 0.0002  | 530.23 | 29110000  | 28          | 21.88 | 21.30 | 21.26 | 21.63 | 20.46    | 13.25 | 12.14 | 13.34 |       |
| +                                     | 4.570              | 5.02                         | 32.52             | Q8K4-F5     | Alpha/beta hydrolase domain-containing protein 11                | Abhd11     | 3715 | 12       | 12                      | 12              | 60.9                  | 60.9                                 | 60.9                         | 33.56             | 0.0000  | 233.79 | 45328000  | 184         | 18.47 | 18.67 | 17.45 | 17.46 | 13.07    | 13.06 | 13.64 | 12.20 |       |
| +                                     | 2.837              | 4.56                         | 23.63             | Q80Y-A7     | Dipeptidyl peptidase 8                                           | Ogp8       | 2900 | 22       | 21                      | 21              | 25.3                  | 24.6                                 | 24.6                         | 102.18            | 0.0000  | 79.281 | 33327000  | 212         | 17.38 | 16.10 | 16.26 | 15.72 | 10.77    | 12.06 | 10.58 | 13.80 |       |
| +                                     | 5.455              | 4.47                         | 22.14             | Q88Y-H8     | Chromodomain-helicase-DNA-binding protein 9                      | Chd9       | 3299 | 3        | 3                       | 3               | 1.3                   | 1.3                                  | 1.3                          | 0.8               | 323.86  | 0.0073 | 1.9854    | 25971000    | 41    | 18.40 | 18.18 | 18.04 | 18.75    | 13.38 | 14.40 | 14.44 | 13.68 |
| +                                     | 4.879              | 4.42                         | 21.44             | Q7TMM0      | Lysosomal Pro-X carboxypeptidase                                 | Pcp        | 2749 | 14       | 14                      | 14              | 29.1                  | 29.1                                 | 29.1                         | 55.026            | 0.0000  | 119.84 | 114550000 | 206         | 18.91 | 19.03 | 18.18 | 18.37 | 14.84    | 13.52 | 14.33 | 14.12 |       |
| +                                     | 3.646              | 4.31                         | 19.82             | Q5U4-C3     | Splicing factor, arginine/serine-rich 19                         | Scaf1      | 2185 | 5        | 5                       | 5               | 5.4                   | 5.4                                  | 5.4                          | 133.84            | 0.0000  | 8.8562 | 40772000  | 9           | 17.06 | 17.62 | 17.84 | 17.65 | 14.55    | 13.17 | 13.22 | 11.99 |       |
| +                                     | 2.149              | 4.17                         | 18.03             | Q80Y-R4     | Zinc finger protein 598                                          | Zfp598     | 2905 | 5        | 5                       | 5               | 7.7                   | 7.7                                  | 7.7                          | 99.191            | 0.0000  | 23.076 | 29526000  | 29          | 17.98 | 18.35 | 16.93 | 17.88 | 12.47    | 12.34 | 16.57 | 13.06 |       |
| +                                     | 3.554              | 3.98                         | 15.53             | Q88N-U4     | Perlecan-2                                                       | Per2       | 3154 | 2        | 2                       | 2               | 16.3                  | 16.3                                 | 16.3                         | 27.638            | 0.0000  | 33.822 | 8691000   | 40          | 16.07 | 16.10 | 16.63 | 16.44 | 12.23    | 12.32 | 13.72 | 11.33 |       |
| +                                     | 1.340              | 3.95                         | 15.46             | Q8WVM3      | Anaphase-promoting complex subunit 7                             | Anapc7     | 5758 | 5        | 5                       | 5               | 13.5                  | 13.5                                 | 13.5                         | 63.02             | 0.0000  | 7.876  | 31486000  | 38          | 18.74 | 18.67 | 19.17 | 19.34 | 11.32    | 16.47 | 18.50 | 13.82 |       |
| +                                     | 2.881              | 3.89                         | 14.78             | Q35298      | Acyl-CoA oxidase 1, long-chain                                   | Acox1      | 354  | 14       | 14                      | 14              | 25.1                  | 25.1                                 | 25.1                         | 65.154            | 0.0000  | 323.31 | 35804000  | 152         | 17.31 | 17.87 | 17.04 | 16.16 | 12.44    | 14.88 | 13.17 | 12.34 |       |
| +                                     | 5.440              | 3.84                         | 14.31             | Q35678      | Monoglyceride lipase                                             | Mgl        | 395  | 16       | 16                      | 16              | 67.7                  | 67.7                                 | 67.7                         | 33.387            | 0.0000  | 140.93 | 41096000  | 144         | 17.15 | 16.84 | 16.69 | 16.15 | 13.15    | 12.95 | 12.76 | 12.61 |       |
| +                                     | 3.535              | 3.70                         | 12.98             | Q31R-M4     | Neuropathy target esterase                                       | Prnpa6     | 1871 | 16       | 16                      | 16              | 17.2                  | 16.6                                 | 16.6                         | 148.54            | 0.0000  | 126.55 | 12390000  | 130         | 17.03 | 15.54 | 16.96 | 16.74 | 13.37    | 11.91 | 13.41 | 12.79 |       |
| +                                     | 2.087              | 3.60                         | 12.15             | P70158      | Acid sphingomyelinase-like phosphodiesterase 3a                  | Smppd3a    | 1528 | 15       | 15                      | 15              | 42.2                  | 42.2                                 | 42.2                         | 49.857            | 0.0000  | 323.31 | 50300000  | 324         | 17.79 | 17.96 | 16.89 | 17.31 | 15.29    | 11.62 | 15.36 | 13.26 |       |
| +                                     | 7.148              | 3.58                         | 11.92             | Q9ET-22     | Dipeptidyl peptidase 2                                           | Dpp7       | 5354 | 20       | 20                      | 20              | 48.6                  | 48.6                                 | 48.6                         | 56.253            | 0.0000  | 323.31 | 64630000  | 602         | 20.88 | 21.15 | 20.89 | 21.04 | 15.99    | 17.15 | 17.45 | 17.47 |       |
| +                                     | 1.773              | 3.51                         | 11.36             | Q8BW-W9     | Serine/threonine-protein kinase N2                               | Pkn2       | 3269 | 7        | 6                       | 6               | 9.4                   | 8.5                                  | 8.5                          | 111.61            | 0.0000  | 6.507  | 14609000  | 22          | 16.81 | 16.37 | 17.70 | 17.77 | 12.01    | 12.82 | 16.61 | 13.19 |       |
| +                                     | 3.450              | 3.50                         | 11.31             | Q90Z-77     | Metal transporter CNNM4                                          | Cnm4       | 2463 | 5        | 5                       | 5               | 8                     | 8                                    | 8                            | 86.625            | 0.0000  | 16.584 | 11176000  | 30          | 18.02 | 16.96 | 17.70 | 17.26 | 13.45    | 15.98 | 15.04 | 12.94 |       |
| +                                     | 5.422              | 3.47                         | 11.07             | A2AH-22     | Activating molecule in BECN1-regulated autophagy protein 1       | Ambr1      | 22   | 3        | 3                       | 3               | 3.9                   | 3.9                                  | 3.9                          | 142.88            | 0.0000  | 21.942 | 9893100   | 25          | 16.84 | 16.37 | 16.75 | 16.81 | 13.49    | 13.60 | 12.96 | 12.85 |       |
| +                                     | 4.840              | 3.46                         | 11.01             | P16675      | Lysosomal protective protein/Lysosomal protective protein 32 kDa | Cla        | 813  | 21       | 21                      | 21              | 43.2                  | 43.2                                 | 43.2                         | 53.844            | 0.0000  | 323.31 | 164190000 | 1311        | 22.21 | 22.65 | 21.68 | 21.93 | 19.06    | 18.23 | 18.57 | 18.77 |       |
| +                                     | 3.245              | 3.42                         | 10.72             | Q8VH-29     | Acyl-coenzyme A thioesterase 11                                  | Acot11     | 4023 | 17       | 17                      | 17              | 42.9                  | 42.9                                 | 42.9                         | 67.354            | 0.0000  | 323.31 | 67620000  | 316         | 17.16 | 17.27 | 17.22 | 17.28 | 14.23    | 13.38 | 15.01 | 12.63 |       |
| +                                     | 3.339              | 3.39                         | 10.51             | P70245      | 3-beta-hydroxyisovaleryl-CoA dehydrogenase                       | Hsd17b3    | 1538 | 2        | 2                       | 2               | 10.9                  | 10.9                                 | 10.9                         | 10.9              | 25.215  | 0.0000 | 11.389    | 25463000    | 46    | 16.13 | 16.08 | 18.08 | 18.89    | 13.01 | 12.26 | 17.83 | 15.22 |
| +                                     | 5.284              | 3.34                         | 10.11             | Q8BV-Q5     | Protein phosphatase methyltransferase 1                          | Ppme1      | 3246 | 17       | 17                      | 17              | 53.9                  | 53.9                                 | 53.9                         | 42.256            | 0.0000  | 200.22 | 64730000  | 347         | 18.87 | 17.04 | 17.43 | 17.11 | 14.33    | 13.90 | 14.05 | 13.81 |       |
| +                                     | 3.701              | 3.32                         | 9.97              | Q9R1-H8     | Serine protease HTRA1                                            | Htra1      | 5647 | 21       | 21                      | 21              | 45.2                  | 45.2                                 | 45.2                         | 51.213            | 0.0000  | 202.98 | 42152000  | 249         | 16.10 | 16.22 | 17.46 | 17.45 | 13.23    | 13.58 | 13.94 | 13.21 |       |
| +                                     | 2.743              | 3.29                         | 9.24              | Q8VH-29     | Dipeptidyl peptidase 9                                           | Dpp9       | 5742 | 40       | 41                      | 41              | 40                    | 57.4                                 | 57.2                         | 98                | 0.0000  | 323.31 | 162960000 | 699         | 19.37 | 19.19 | 19.04 | 19.28 | 16.98    | 15.66 | 16.98 | 16.27 |       |
| +                                     | 0.597              | 3.07                         | 8.40              | Q8C1-L0     | Rosiglitazone                                                    | Croc       | 3566 | 6        | 6                       | 6               | 3                     | 3                                    | 3                            | 226.94            | 0.0044  | 2.4043 | 121400000 | 45          | 19.12 | 20.42 | 17.94 | 18.24 | 11.64    | 20.54 | 19.32 | 11.94 |       |
| +                                     | 1.284              | 3.05                         | 8.27              | A2AJ-Q3     | Probable C-mannosyltransferase DPY19L4                           | Dpy19l4    | 31   | 6        | 6                       | 6               | 13.9                  | 13.9                                 | 13.9                         | 83.603            | 0.0000  | 10.727 | 24856000  | 32          | 18.13 | 16.96 | 18.09 | 17.09 | 17.67    | 13.90 | 14.73 | 17.11 |       |
| +                                     | 2.658              | 2.99                         | 7.92              | Q9P4-T0     | Autophagy-related protein 2 homolog A                            | Atg2a      | 2565 | 8        | 8                       | 8               | 9                     | 9                                    | 9                            | 210.94            | 0.0000  | 47.38  | 5079100   | 26          | 16.01 | 15.20 | 16.03 | 16.92 | 12.64    | 14.29 | 13.17 | 12.10 |       |
| +                                     | 6.420              | 2.91                         | 7.49              | P12811      | Neutral alpha-glucosidase C                                      | Glc3a      | 8    | 5        | 5                       | 5               | 8                     | 8                                    | 8                            | 102.019           | 0.0000  | 6.5977 | 21286000  | 8           | 17.93 | 12.28 | 16.18 | 17.11 | 11.22    | 12.57 | 12.85 | 15.78 |       |
| +                                     | 6.006              | 2.95                         | 7.75              | Q9R1-L6     | Acylamine-acyl-releasing enzyme                                  | Apeh       | 3776 | 45       | 45                      | 45              | 69                    | 69                                   | 69                           | 81.558            | 0.0000  | 323.31 | 388940000 | 1037        | 20.01 | 20.22 | 19.88 | 20.19 | 17.20    | 17.09 | 17.29 | 16.00 |       |
| +                                     | 3.258              | 2.94                         | 7.67              | Q8PE-15     | Mycophenolic acid acyl-glucuronide esterase, mitochondrial       | Abhd10     | 2823 | 17       | 17                      | 17              | 63.3                  | 63.3                                 | 63.3                         | 33.04             | 0.0000  | 164.24 | 32945000  | 154         | 15.69 | 17.41 | 16.62 | 15.91 | 13.18    | 13.34 | 13.27 | 14.09 |       |
| +                                     | 4.542              | 2.94                         | 7.65              | Q923-D4     | Splicing factor 3B subunit 5                                     | Sf3b5      | 2623 | 6        | 6                       | 6               | 68.6                  | 68.6                                 | 68.6                         | 10.119            | 0.0000  | 146.14 | 43936000  | 177         | 18.25 | 18.55 | 17.60 | 18.17 | 14.81    | 15.23 | 15.67 | 15.02 |       |
| +                                     | 4.420              | 2.91                         | 7.49              | P12811      | Natural resistance-associated macrophage protein 1               | Nram1      | 101  | 4        | 4                       | 4               | 4.9                   | 4.9                                  | 4.9                          | 101.18            | 0.0000  | 6.0022 | 35769000  | 20          | 16.00 | 15.98 | 16.21 | 16.21 | 13.74    | 13.68 | 13.20 | 12.98 |       |
| +                                     | 4.789              | 2.87                         | 7.30              | Q9DB-L9     | 1-acylglycerol-3-phosphate O-acyltransferase ABHD5               | Abhd5      | 5162 | 8        | 8                       | 8               | 28.8                  | 28.8                                 | 28.8                         | 39.154            | 0.0000  | 59.913 | 21459000  | 104         | 16.58 | 16.55 | 16.04 | 16.58 | 13.49    | 13.08 | 13.75 | 13.95 |       |
| +                                     | 1.530              | 2.85                         | 7.23              | Q91V-U7     | Put1 endopeptidase                                               | Pue7       | 4080 | 6        | 6                       | 6               | 12.3                  | 12.3                                 | 12.3                         | 74.792            | 0.0000  | 11.175 | 13363000  | 20          | 17.57 | 16.78 | 16.77 | 16.05 | 12.78    | 12.71 | 16.75 | 13.52 |       |
| +                                     | 6.358              | 2.80                         | 6.96              | Q9QU-R6     | Prolyl endopeptidase                                             | Prpp       | 5522 | 65       | 65                      | 65              | 77.5                  | 77.5                                 | 77.5                         | 80.751            | 0.0000  | 323.31 | 840700000 | 1988        | 20.03 | 20.10 | 19.78 | 19.96 | 17.42    | 17.00 | 17.23 | 17.01 |       |
| +                                     | 1.062              | 2.79                         | 6.93              | Q341-D1     | Hormone-sensitive lipase                                         | Hsl        | 129  | 34       | 34                      | 34              | 64.8                  | 64.8                                 | 64.8                         | 83.347            | 0.0000  | 323.31 | 78394000  | 414         | 19.06 | 18.22 | 15.92 | 15.83 | 13.51    | 15.84 | 15.78 |       |       |
| +                                     | 0.880              | 2.78                         | 6.88              | Q9Z2-R0     | Phospholipase D1                                                 | Pltd1      | 5834 | 14       | 14                      | 14              | 15.3                  | 15.3                                 | 15.3                         | 123.97            | 0.0000  | 54.275 | 70289000  | 118         | 20.24 | 19.35 | 20.15 | 20.18 | 18.35    | 18.84 | 19.12 | 17.47 |       |
| +                                     | 1.215              | 2.76                         | 6.85              | Q91W-F7     | Polysphingomyelinase phosphatase                                 | Fig4       | 4108 | 6        | 6                       | 6               | 7.7                   | 7.7                                  | 7.7                          | 103.45            | 0.0000  | 24.906 | 29927000  | 36          | 18.47 | 16.53 | 17.93 | 17.77 | 13.46    | 12.44 | 16.04 | 13.67 |       |
| +                                     | 1.792              | 2.78                         | 6.85              | Q91U-Z5     | Inositol monophosphatase 2                                       | Imp2       | 4038 | 7        | 7                       | 7               | 37.2                  | 37.2                                 | 37.2                         | 31.716            | 0.0000  | 119.28 | 9862600   | 80          | 16.50 | 16.06 | 16.40 | 15.88 | 13.49    | 12.08 | 15.74 | 12.43 |       |
| +                                     | 2.224              | 2.77                         | 6.83              | Q8VR-U2     | Tropomyosin alpha-4 chain                                        | Tpm4       | 2519 | 15       | 14                      | 14              | 75.8                  | 70.6                                 | 70.6                         | 28.467            | 0.0000  | 89.828 | 18402000  | 144         | 16.75 | 16.90 | 15.77 | 16.42 | 15.18    | 12.23 | 14.61 | 12    |       |

|       |      |      |        |                                                                 |         |      |    |    |    |      |      |      |        |        |        |          |     |       |       |       |       |       |       |       |       |
|-------|------|------|--------|-----------------------------------------------------------------|---------|------|----|----|----|------|------|------|--------|--------|--------|----------|-----|-------|-------|-------|-------|-------|-------|-------|-------|
| 1.806 | 2.06 | 4.16 | Q3UKC1 | Tax1-binding protein 1 homolog                                  | Tax1bp1 | 1987 | 6  | 6  | 6  | 8.5  | 8.5  | 8.5  | 93.629 | 0.0000 | 21.07  | 4571000  | 47  | 15.49 | 15.02 | 15.43 | 15.72 | 12.20 | 14.44 | 14.35 | 12.46 |
| 1.878 | 2.06 | 4.16 | Q61133 | Glutathione S-transferase theta-2                               | Gstt2   | 2256 | 4  | 4  | 4  | 19.7 | 19.7 | 19.7 | 27.634 | 0.0046 | 2.3758 | 8185600  | 15  | 16.25 | 15.87 | 17.25 | 15.72 | 15.39 | 13.22 | 14.57 | 13.69 |
| 0.479 | 2.05 | 4.15 | Q9DC24 | Apolipoprotein O                                                | ApoO    | 5238 | 6  | 6  | 6  | 38.9 | 38.9 | 38.9 | 22.604 | 0.0000 | 42.086 | 3077000  | 27  | 18.29 | 18.00 | 19.36 | 11.39 | 16.71 | 13.35 | 14.31 | 14.48 |
| 1.649 | 2.05 | 4.15 | Q8C255 | Dipeptidase 2                                                   | Dpep2   | 3399 | 3  | 3  | 3  | 10.3 | 10.3 | 10.3 | 52.664 | 0.0000 | 17.834 | 4692800  | 38  | 16.07 | 16.11 | 16.58 | 15.58 | 15.50 | 13.24 | 14.67 | 12.72 |
| 1.814 | 2.04 | 4.14 | Q5LJ42 | Conserved oligomeric Golgi complex subunit 8                    | COG8    | 5420 | 2  | 2  | 2  | 29.2 | 29.2 | 29.2 | 21.601 | 0.0000 | 53.045 | 5428900  | 39  | 15.72 | 14.18 | 14.83 | 14.52 | 12.30 | 14.12 | 13.50 | 15.38 |
| 2.132 | 2.05 | 4.14 | Q3UUG6 | TBC1 domain family member 24                                    | Tbc1d24 | 3301 | 4  | 4  | 4  | 9.8  | 9.8  | 9.8  | 63.235 | 0.0000 | 11.61  | 2967100  | 35  | 14.77 | 14.40 | 15.12 | 14.12 | 11.86 | 13.79 | 11.80 | 12.76 |
| 2.722 | 2.05 | 4.13 | Q9RG08 | Guanine nucleotide exchange factor VAV3                         | Vav3    | 5622 | 11 | 10 | 10 | 16.6 | 15.5 | 15.5 | 97.967 | 0.0000 | 61.044 | 6007200  | 59  | 14.82 | 15.05 | 14.84 | 15.30 | 12.93 | 13.73 | 13.21 | 11.96 |
| 3.753 | 2.04 | 4.12 | Q9WVQ6 | Histone-arginine methyltransferase CARM1                        | Carm1   | 5748 | 10 | 10 | 10 | 10   | 27.1 | 27.1 | 16.853 | 0.0000 | 69.757 | 13793000 | 163 | 15.85 | 15.27 | 15.97 | 15.51 | 13.61 | 13.47 | 14.13 | 13.23 |
| 1.921 | 2.04 | 4.11 | Q9R366 | Immunoglobulin superfamily member 8                             | Igfbp8  | 3508 | 12 | 12 | 12 | 12.6 | 12.6 | 12.6 | 65.01  | 0.0000 | 45.841 | 4709600  | 39  | 15.55 | 15.28 | 15.35 | 15.13 | 13.16 | 14.12 | 13.50 | 15.23 |
| 1.847 | 2.03 | 4.08 | Q9D338 | 39S ribosomal protein L19, mitochondrial                        | Mpl19   | 4958 | 4  | 4  | 3  | 17.1 | 17.1 | 13.7 | 33.578 | 0.0000 | 6.2952 | 6352900  | 21  | 16.18 | 14.66 | 14.92 | 16.42 | 13.60 | 12.38 | 13.91 | 14.17 |
| 1.983 | 2.02 | 4.07 | Q9D659 | Platelet receptor G24                                           | G24     | 4989 | 2  | 2  | 2  | 14   | 14   | 14   | 33.559 | 0.0000 | 45.976 | 4618700  | 34  | 14.12 | 15.45 | 15.63 | 15.49 | 11.92 | 13.78 | 13.32 | 15.38 |
| 2.494 | 2.02 | 4.07 | Q35887 | Calumenin                                                       | Calu    | 409  | 6  | 6  | 6  | 21   | 21   | 21   | 37.063 | 0.0000 | 13.659 | 4702600  | 42  | 15.22 | 15.86 | 15.32 | 15.56 | 13.22 | 13.84 | 14.33 | 12.40 |
| 1.927 | 2.02 | 4.07 | Q81ZK9 | Hydroxy sulfate 2-O-sulfotransferase 1                          | Hs2at1  | 3847 | 3  | 3  | 3  | 12.1 | 12.1 | 12.1 | 18.408 | 0.0000 | 8.4847 | 9200     | 67  | 15.39 | 14.83 | 15.37 | 15.41 | 12.83 | 14.83 | 14.12 | 13.50 |
| 1.756 | 2.02 | 4.07 | Q8JZK9 | Hydroxymethylglutaryl-CoA synthase, cytoplasmic                 | Hmgcs1  | 3573 | 6  | 6  | 6  | 21.2 | 21.2 | 21.2 | 57.568 | 0.0000 | 26.865 | 4553900  | 51  | 15.54 | 14.89 | 16.04 | 14.24 | 13.64 | 14.10 | 11.86 | 13.02 |
| 1.594 | 2.02 | 4.05 | P50431 | Serine hydroxymethyltransferase, cytosolic                      | Shmt1   | 1183 | 11 | 10 | 10 | 32   | 29.1 | 29.1 | 52.6   | 0.0000 | 30.309 | 1039800  | 82  | 16.19 | 15.57 | 16.19 | 16.24 | 14.30 | 14.63 | 15.09 | 12.10 |
| 2.184 | 2.01 | 4.03 | Q8B8G2 | Tetrahidropyridine repeat protein 7A                            | Tet7a   | 2972 | 4  | 4  | 4  | 7.1  | 7.1  | 7.1  | 86.155 | 0.0000 | 16.308 | 3987800  | 28  | 15.55 | 14.52 | 14.98 | 14.58 | 12.44 | 13.35 | 13.86 | 11.95 |
| 2.753 | 1.99 | 3.98 | Q91YV5 | UDP-N-acetylglucosamine pyrophosphorylase/UDP-N-acetylgluc      | Ube1    | 4168 | 5  | 4  | 4  | 15.9 | 13.4 | 13.4 | 58.608 | 0.0034 | 2.5912 | 1618900  | 4   | 14.82 | 15.21 | 15.00 | 13.96 | 12.32 | 12.47 | 13.31 | 13.02 |
| 1.408 | 1.99 | 3.98 | Q80U95 | Ubiquitin-protein ligase E3C                                    | Ube3c   | 2827 | 5  | 5  | 5  | 7.7  | 7.7  | 7.7  | 123.97 | 0.0000 | 12.056 | 1308600  | 39  | 16.91 | 16.84 | 17.64 | 17.23 | 13.30 | 16.15 | 16.69 | 14.00 |
| 3.600 | 1.98 | 3.95 | P34152 | Focal adhesion kinase 1                                         | Fak2    | 1006 | 7  | 6  | 6  | 10.9 | 10.2 | 10.2 | 119.24 | 0.0000 | 40.008 | 2307000  | 35  | 14.08 | 13.77 | 14.48 | 13.85 | 12.86 | 11.97 | 12.47 | 11.54 |
| 2.046 | 1.97 | 3.93 | Q8C1G6 | Probable calcium-transporting ATPase 13A2                       | Atp13a2 | 4703 | 7  | 7  | 7  | 11.1 | 11.1 | 11.1 | 126.44 | 0.0000 | 96.804 | 8874900  | 81  | 15.72 | 15.60 | 16.33 | 15.95 | 13.38 | 14.67 | 14.85 | 12.81 |
| 2.249 | 1.97 | 3.92 | P98102 | Dihydroxyacetone phosphobate acyltransferase                    | Gnol    | 1688 | 5  | 5  | 5  | 11.5 | 11.5 | 11.5 | 76.869 | 0.0000 | 16.907 | 4635100  | 38  | 15.37 | 14.79 | 15.19 | 15.48 | 13.93 | 12.70 | 14.05 | 12.27 |
| 4.118 | 1.97 | 3.90 | Q8VEB4 | Group XV phospholipase A2                                       | Pla2g15 | 3998 | 12 | 12 | 12 | 29.9 | 29.9 | 29.9 | 47.307 | 0.0000 | 74.85  | 8474600  | 235 | 17.93 | 17.98 | 17.42 | 18.02 | 15.95 | 15.63 | 16.26 | 15.64 |
| 2.491 | 1.96 | 3.89 | Q8B556 | Palatin-like phospholipase domain-containing protein 2          | Pnpla2  | 3072 | 12 | 12 | 12 | 42.2 | 42.2 | 42.2 | 53.656 | 0.0000 | 48.623 | 15457000 | 137 | 16.89 | 16.01 | 16.71 | 16.57 | 13.79 | 15.37 | 14.15 | 15.03 |
| 2.685 | 1.96 | 3.87 | P70288 | Histone deacetylase 2                                           | Hdac2   | 1546 | 16 | 9  | 9  | 44.9 | 32.6 | 32.6 | 55.302 | 0.0000 | 48.431 | 1256600  | 131 | 17.95 | 15.56 | 15.87 | 15.45 | 14.38 | 12.73 | 14.05 | 13.86 |
| 1.513 | 1.95 | 3.86 | Q8B8M0 | F-box only protein 38                                           | Fbxo38  | 3178 | 7  | 7  | 7  | 8.9  | 8.9  | 8.9  | 133.93 | 0.0000 | 22.408 | 5414100  | 12  | 14.31 | 14.65 | 15.72 | 15.19 | 13.77 | 14.20 | 13.71 | 11.63 |
| 1.923 | 1.94 | 3.84 | Q8R313 | Ecoxyol complex component 6                                     | Eco6    | 3829 | 9  | 8  | 8  | 15.2 | 14.1 | 14.1 | 93.076 | 0.0000 | 32.597 | 9201400  | 82  | 16.27 | 16.03 | 16.04 | 16.24 | 14.48 | 12.60 | 14.90 | 14.83 |
| 1.927 | 1.94 | 3.83 | Q53587 | HCL1-associated protein X-1                                     | Hax1    | 3627 | 3  | 3  | 3  | 18.2 | 18.2 | 18.2 | 31.654 | 0.0000 | 65.581 | 1691800  | 17  | 14.17 | 14.09 | 14.56 | 14.81 | 13.32 | 13.41 | 11.43 | 11.75 |
| 2.684 | 1.93 | 3.81 | Q5UJ09 | HR23 adapter protein 3                                          | Hrb23   | 5392 | 3  | 3  | 3  | 8.1  | 8.1  | 8.1  | 55.557 | 0.0000 | 74.052 | 5513000  | 33  | 15.28 | 15.57 | 15.31 | 16.31 | 12.88 | 13.67 | 13.50 | 15.38 |
| 2.504 | 1.93 | 3.81 | Q9D000 | TBC1 domain family member 7                                     | Tbc1d7  | 4871 | 3  | 3  | 3  | 16.4 | 16.4 | 16.4 | 33.826 | 0.0000 | 10.028 | 2754300  | 29  | 15.13 | 14.41 | 14.85 | 14.91 | 13.18 | 12.91 | 13.51 | 11.79 |
| 1.639 | 1.92 | 3.77 | Q9DBU3 | Serine/threonine-protein kinase RIO3                            | Rio3    | 5179 | 6  | 6  | 6  | 18.1 | 18.1 | 18.1 | 58.704 | 0.0000 | 15.82  | 5071000  | 38  | 14.97 | 15.12 | 15.91 | 15.75 | 14.50 | 12.18 | 14.51 | 12.89 |
| 1.578 | 1.91 | 3.76 | Q8R123 | FAD synthase/Molybdenum cofactor biosynthesis protein-like re   | Flad1   | 3773 | 6  | 6  | 6  | 20.5 | 20.5 | 20.5 | 54.766 | 0.0000 | 59.061 | 11234000 | 114 | 15.71 | 15.49 | 16.37 | 16.04 | 13.91 | 14.24 | 15.42 | 12.39 |
| 3.046 | 1.90 | 3.74 | Q8BKX1 | Bran-specific angiotensin inhibitor 1-associated protein 2      | Itihap2 | 3107 | 11 | 11 | 11 | 35   | 31.7 | 31.7 | 55.236 | 0.0000 | 86.507 | 7307000  | 76  | 15.49 | 14.92 | 16.08 | 15.40 | 13.82 | 13.09 | 13.67 | 13.32 |
| 1.390 | 1.90 | 3.74 | Q8K5C8 | Phosphatidylcholine glycan anchor biosynthesis class U protein  | Pou1    | 3691 | 3  | 3  | 3  | 6.7  | 6.7  | 6.7  | 49.804 | 0.0000 | 44.154 | 5597300  | 63  | 16.25 | 15.52 | 15.44 | 16.12 | 15.12 | 14.67 | 12.88 | 13.27 |
| 1.289 | 1.90 | 3.73 | P11531 | Dystrophin                                                      | Dmd     | 7462 | 6  | 6  | 6  | 2.5  | 2.5  | 2.5  | 425.83 | 0.0000 | 9.7677 | 7703900  | 31  | 16.54 | 14.89 | 16.55 | 16.00 | 15.11 | 12.42 | 15.28 | 13.57 |
| 2.418 | 1.90 | 3.72 | Q3ULF4 | Paralepin                                                       | Parp    | 1996 | 17 | 17 | 17 | 30.9 | 30.9 | 30.9 | 85.995 | 0.0000 | 72.375 | 15476000 | 155 | 15.84 | 15.51 | 16.41 | 16.14 | 13.73 | 13.36 | 15.07 | 14.16 |
| 1.350 | 1.89 | 3.72 | Q548H6 | TRIO protein tyrosine kinase-binding protein                    | Trtp    | 430  | 10 | 10 | 10 | 25.4 | 25.4 | 25.4 | 35.307 | 0.0000 | 56.103 | 4382600  | 26  | 12.39 | 15.07 | 15.30 | 15.48 | 15.07 | 12.70 | 12.05 | 14.38 |
| 2.103 | 1.87 | 3.67 | Q69237 | Sterile alpha motif domain-containing protein 9-like            | Samd9l  | 2478 | 26 | 26 | 25 | 19.6 | 19.6 | 19.6 | 19.802 | 0.0000 | 85.874 | 14810000 | 105 | 16.59 | 15.73 | 15.47 | 15.60 | 14.84 | 13.06 | 14.45 | 13.55 |
| 2.558 | 1.87 | 3.65 | Q3T1C2 | Putative phospholipase B-like 2/Putative phospholipase B-like 2 | Pib2    | 1828 | 12 | 12 | 12 | 27.9 | 27.9 | 27.9 | 66.289 | 0.0000 | 166.15 | 27345000 | 212 | 17.39 | 17.01 | 16.95 | 17.10 | 15.46 | 14.24 | 16.01 | 15.28 |
| 0.721 | 1.86 | 3.63 | Q8BLLK | Ribosomal protein S6 kinase delta-1                             | Rskdcl1 | 2119 | 6  | 6  | 6  | 8.6  | 8.6  | 8.6  | 116.71 | 0.0000 | 16.751 | 7098600  | 19  | 17.17 | 16.43 | 13.20 | 17.45 | 13.04 | 13.53 | 16.54 | 13.69 |
| 1.174 | 1.86 | 3.63 | P70783 | Actin-protein thioesterase 1                                    | Ucp1a1  | 1679 | 13 | 13 | 13 | 21.6 | 21.6 | 21.6 | 24.687 | 0.0000 | 17.446 | 1776000  | 24  | 15.49 | 15.72 | 16.08 | 15.77 | 14.46 | 13.73 | 14.52 | 12.96 |
| 1.804 | 1.86 | 3.62 | Q3Q1T1 | Probable palmitoyltransferase ZDHHC20                           | Zdhhc20 | 3176 | 4  | 4  | 4  | 16.8 | 16.8 | 16.8 | 43.975 | 0.0000 | 45.802 | 6710000  | 17  | 15.53 | 15.37 | 16.40 | 15.47 | 14.88 | 13.16 | 14.89 | 12.81 |
| 0.949 | 1.85 | 3.60 | Q6ZPU9 | KIF-1-binding protein                                           | Kbp     | 2684 | 7  | 7  | 7  | 16.5 | 16.5 | 16.5 | 71.051 | 0.0000 | 29.654 | 1316500  | 39  | 17.62 | 15.93 | 17.25 | 17.16 | 14.49 | 13.84 | 16.95 | 13.28 |
| 1.354 | 1.85 | 3.59 | Q8VE10 | N-alpha-acetyltransferase 40                                    | Naa40   | 3980 | 3  | 3  | 3  | 14.8 | 14.8 | 14.8 | 77.229 | 0.0000 | 14.658 | 4333200  | 52  | 15.37 | 14.28 | 16.08 | 15.75 | 15.00 | 12.98 | 13.92 | 12.19 |
| 1.296 | 1.84 | 3.57 | A04611 | Geranylgeranyl transferase type-1 subunit beta                  | Mgap    | 51   | 6  | 6  | 6  | 10.1 | 10.1 | 10.1 | 80.851 | 0.0000 | 19.92  | 6390900  | 63  | 15.75 | 15.24 | 15.88 | 15.77 | 14.50 | 13.31 | 14.52 | 12.68 |
| 4.831 | 1.83 | 3.57 | Q8PFR5 | Transformer-2 protein homolog alpha                             | Traca   | 2629 | 6  | 5  | 5  | 22.1 | 18.5 | 18.5 | 32.316 | 0.0000 | 15.823 | 12407000 | 58  | 16.97 | 17.35 | 17.10 | 17.31 | 15.31 | 15.67 | 15.27 | 15.14 |
| 4.159 | 1.83 | 3.55 | Q8BUV9 | Geranylgeranyl transferase type-1 subunit beta                  | Pagtlb  | 3233 | 6  | 6  | 5  | 21.8 | 16.2 | 16.2 | 42.354 | 0.0000 | 29.669 | 7461500  | 57  | 15.24 | 14.39 | 14.77 | 14.80 | 12.86 | 13.12 | 12.84 | 13.08 |
| 1.657 | 1.82 | 3.54 | Q8C5K5 | Mesencephalic astrocyte-derived neurotrophic factor             | Mefn    | 1289 | 4  | 4  | 4  | 17   | 17   | 17   | 38.81  | 0.0000 | 19.533 | 2391500  | 25  | 14.65 | 14.49 | 14.81 | 12.83 | 12.67 | 12.05 | 12.35 | 12.47 |
| 1.820 | 1.82 | 3.54 | Q8Q8N2 | Calcium/calmodulin-dependent protein kinase kinase 2            | Cmk2    | 3335 | 18 | 18 | 18 | 14.4 | 14.4 | 14.4 | 66.414 | 0.0000 | 26.401 | 6020700  | 14  | 14.55 | 14.99 | 14.85 | 14.46 | 13.12 | 12.70 | 13.74 | 11.56 |
| 2.470 | 1.82 | 3.53 | Q9D379 | Epoxydylase 1                                                   | Epfx1   | 4951 | 18 | 18 | 18 | 33   | 33   | 33   | 52.576 | 0.0000 | 77.051 | 22651000 | 157 | 17.10 | 15.91 | 16.03 | 16.16 | 13.27 | 14.13 | 14.26 | 13.51 |
| 4.9   |      |      |        |                                                                 |         |      |    |    |    |      |      |      |        |        |        |          |     |       |       |       |       |       |       |       |       |



|       |      |      |        |                                                                              |             |      |    |    |    |      |  |      |  |      |         |        |          |          |         |        |       |       |       |       |       |       |       |       |
|-------|------|------|--------|------------------------------------------------------------------------------|-------------|------|----|----|----|------|--|------|--|------|---------|--------|----------|----------|---------|--------|-------|-------|-------|-------|-------|-------|-------|-------|
| 1.367 | 1.38 | 2.60 | P59438 | Hermansky-Pudlak syndrome 5 protein homolog                                  | Hpa5        | 1337 | 7  | 7  | 7  | 10.4 |  | 10.4 |  | 10.4 | 126.34  | 0.0000 | 17.397   | 3812000  | 36      | 14.57  | 13.72 | 15.20 | 14.61 | 13.26 | 13.85 | 13.62 | 11.87 |       |
| 2.805 | 1.38 | 2.58 | Q8K078 | Solute carrier organic anion transporter family member 4A1                   | Slocat1     | 3599 | 4  | 4  | 4  | 9    |  | 9    |  | 9    | 77.668  | 0.0000 | 4.807    | 7646000  | 74      | 15.79  | 15.53 | 15.19 | 15.92 | 14.36 | 14.41 | 14.51 | 13.66 |       |
| 0.540 | 1.37 | 2.59 | A8C756 | Thyroid adenoma-associated protein homolog                                   | Thad1       | 566  | 3  | 3  | 3  | 2.3  |  | 2.3  |  | 2.3  | 217.29  | 0.0096 | 1.8079   | 1643000  | 16      | 17.27  | 17.62 | 17.84 | 17.74 | 17.46 | 17.22 | 17.56 | 12.73 |       |
| 1.051 | 1.37 | 2.59 | Q8BHA3 | Probable D-xyrosyl-(HNA/Tyr) deacylase 2                                     | Dx2         | 3519 | 5  | 5  | 5  | 54.8 |  | 54.8 |  | 54.8 | 95.236  | 0.0000 | 68.409   | 7863700  | 94      | 16.01  | 15.62 | 15.75 | 15.92 | 14.69 | 14.59 | 14.51 | 15.11 |       |
| 1.665 | 1.37 | 2.59 | Q9WTU6 | Mitogen-activated protein kinase 9                                           | Mapk9       | 5689 | 4  | 4  | 2  | 9.9  |  | 9.9  |  | 9.9  | 5.7     | 48.189 | 0.0004   | 4.926    | 6219200 | 55     | 15.24 | 15.10 | 15.28 | 15.49 | 14.13 | 14.69 | 12.66 | 14.23 |
| 2.272 | 1.37 | 2.59 | Q08642 | Protein-arginine deiminase type-2                                            | Pad2        | 1765 | 7  | 7  | 7  | 14.3 |  | 14.3 |  | 14.3 | 76.249  | 0.0004 | 74.121   | 6248300  | 77      | 19.52  | 19.83 | 19.62 | 19.65 | 18.84 | 18.20 | 17.43 | 18.67 |       |
| 2.040 | 1.37 | 2.59 | QJUM90 | Signal-transducing adaptor protein 1                                         | Slap1       | 5500 | 8  | 8  | 8  | 38.7 |  | 38.7 |  | 38.7 | 34.627  | 0.0000 | 129.59   | 7748400  | 76      | 15.77  | 15.28 | 14.99 | 14.99 | 14.64 | 13.12 | 13.82 | 13.98 |       |
| 1.231 | 1.37 | 2.59 | Q8CHT2 | E3 ubiquitin-protein ligase TRIM32                                           | Trim32      | 3519 | 5  | 5  | 5  | 10.1 |  | 10.1 |  | 10.1 | 72.057  | 0.0000 | 18.689   | 4381200  | 48      | 14.64  | 13.96 | 13.96 | 13.96 | 14.38 | 13.33 | 13.71 | 13.65 |       |
| 2.612 | 1.37 | 2.58 | Q9DCM2 | Glutathione S-transferase kappa 1                                            | Gstk1       | 5223 | 8  | 8  | 8  | 37.2 |  | 37.2 |  | 37.2 | 25.704  | 0.0000 | 95.692   | 9778300  | 105     | 15.83  | 15.39 | 16.31 | 16.06 | 14.23 | 15.09 | 14.38 | 14.42 |       |
| 1.319 | 1.38 | 2.57 | Q0D850 | AP-1 complex subunit sigma-2                                                 | Actr2       | 5178 | 2  | 2  | 2  | 11.9 |  | 11.9 |  | 11.9 | 18.929  | 0.0013 | 3.5297   | 5687500  | 59      | 14.89  | 15.34 | 16.14 | 16.00 | 13.74 | 13.26 | 15.39 | 14.52 |       |
| 1.386 | 1.37 | 2.57 | Q8CAV3 | Negative elongation factor B                                                 | NefB        | 3390 | 10 | 10 | 10 | 25.3 |  | 25.3 |  | 25.3 | 68.636  | 0.0000 | 68.752   | 10473000 | 104     | 15.48  | 14.83 | 15.57 | 15.57 | 15.66 | 14.66 | 14.19 | 14.99 |       |
| 2.163 | 1.36 | 2.57 | P70658 | C-X-C chemokine receptor type 3                                              | Cxcr1       | 1529 | 3  | 3  | 3  | 8.6  |  | 8.6  |  | 8.6  | 40.426  | 0.0000 | 165.9    | 9197500  | 108     | 14.17  | 15.50 | 16.03 | 16.26 | 14.47 | 13.90 | 15.26 | 14.89 |       |
| 1.427 | 1.36 | 2.57 | Q8R278 | General transcription factor 3C polypeptide 5                                | Gtf3c5      | 3820 | 6  | 6  | 6  | 14.4 |  | 14.4 |  | 14.4 | 60.501  | 0.0000 | 90.328   | 2466800  | 33      | 14.70  | 14.08 | 14.58 | 13.91 | 13.76 | 11.59 | 13.26 | 13.23 |       |
| 1.458 | 1.36 | 2.56 | Q91W18 | WW domain-containing oocyte dyadectome                                       | Wwox        | 4119 | 9  | 9  | 9  | 9.7  |  | 9.7  |  | 9.7  | 46.512  | 0.0000 | 7.5278   | 2812300  | 34      | 14.46  | 13.73 | 14.58 | 14.88 | 13.49 | 13.48 | 13.84 | 11.97 |       |
| 1.308 | 1.35 | 2.56 | Q8ER02 | Strept-3                                                                     | Strn3       | 5310 | 11 | 10 | 8  | 16.2 |  | 14.9 |  | 13.8 | 146.3   | 0.0000 | 30.312   | 8913300  | 62      | 15.92  | 15.28 | 15.37 | 15.39 | 13.92 | 14.63 | 14.83 | 12.41 |       |
| 1.231 | 1.35 | 2.55 | Q8ZWRE | Nesprin-1                                                                    | Syne1       | 2705 | 14 | 14 | 14 | 2.5  |  | 2.5  |  | 2.5  | 100.99  | 0.0000 | 41.886   | 6835000  | 42      | 14.67  | 14.80 | 15.44 | 15.80 | 13.03 | 13.05 | 15.21 | 14.02 |       |
| 0.505 | 1.35 | 2.55 | P53808 | Phosphatidylcholine transfer protein                                         | Ptcp        | 1239 | 6  | 6  | 6  | 25.7 |  | 25.7 |  | 25.7 | 24.785  | 0.0000 | 19.516   | 1441000  | 32      | 15.60  | 14.70 | 17.11 | 16.43 | 17.56 | 12.75 | 16.92 | 13.91 |       |
| 1.334 | 1.35 | 2.55 | Q8BX02 | GPI transmembrane component PIG-2                                            | Pig2        | 3289 | 10 | 10 | 10 | 18   |  | 18   |  | 18   | 65.704  | 0.0000 | 39.869   | 5939200  | 22      | 14.76  | 15.41 | 15.06 | 14.82 | 14.76 | 13.81 | 14.52 | 12.17 |       |
| 1.316 | 1.35 | 2.55 | Q08848 | 60 kDa SS-A/Ro ribonucleoprotein                                             | Trove2      | 3207 | 7  | 7  | 7  | 15.2 |  | 15.2 |  | 15.2 | 60.123  | 0.0000 | 22.965   | 5924000  | 72      | 15.02  | 14.57 | 15.51 | 15.24 | 14.13 | 14.22 | 14.38 | 12.21 |       |
| 1.208 | 1.35 | 2.55 | Q9JZT5 | FYVE, RhoGEF and PH domain-containing protein 4                              | Fgaf4       | 4200 | 13 | 13 | 13 | 24.2 |  | 24.2 |  | 24.2 | 86.54   | 0.0000 | 69.606   | 6060400  | 93      | 15.34  | 14.07 | 14.93 | 14.96 | 14.67 | 13.84 | 13.20 | 12.19 |       |
| 1.065 | 1.35 | 2.55 | Q9CWCU | Paritylase/elongase ZDHHC13                                                  | Zdhc13      | 4731 | 6  | 6  | 6  | 14.6 |  | 14.6 |  | 14.6 | 70.889  | 0.0000 | 10.063   | 9727000  | 41      | 14.85  | 13.50 | 15.87 | 15.57 | 13.88 | 13.29 | 14.64 | 12.78 |       |
| 0.833 | 1.35 | 2.55 | P51125 | Calpastatin                                                                  | Cast        | 1190 | 25 | 25 | 25 | 41.5 |  | 41.5 |  | 41.5 | 84.921  | 0.0000 | 323.31   | 2582300  | 227     | 16.08  | 15.26 | 15.89 | 15.99 | 15.90 | 15.01 | 15.41 | 12.11 |       |
| 2.356 | 1.35 | 2.54 | Q8KZV6 | Importin-11                                                                  | Ipo11       | 3675 | 4  | 4  | 4  | 7.8  |  | 7.8  |  | 7.8  | 112.41  | 0.0000 | 83.39    | 3770100  | 75      | 14.82  | 14.06 | 13.79 | 14.12 | 12.75 | 13.34 | 12.97 | 12.33 |       |
| 2.325 | 1.35 | 2.54 | P31266 | 006Recombining binding protein suppressor of hairless                        | Rbpj        | 986  | 15 | 15 | 15 | 32.1 |  | 32.1 |  | 32.1 | 58.537  | 0.0000 | 65.088   | 2634500  | 207     | 16.78  | 16.43 | 16.38 | 16.51 | 15.87 | 14.64 | 15.47 | 14.74 |       |
| 2.832 | 1.34 | 2.54 | Q8BFP9 | Pyruvate dehydrogenase (acetyl-transferring) kinase isozyme 1, mitochondrial | Pdh1        | 2941 | 7  | 7  | 7  | 23.5 |  | 23.5 |  | 23.5 | 48.994  | 0.0000 | 31.785   | 10527000 | 108     | 16.00  | 15.42 | 15.54 | 15.40 | 14.10 | 13.76 | 14.47 | 14.65 |       |
| 1.036 | 1.34 | 2.54 | Q9CPL4 | Micromal glutathione S-transferase 3                                         | Mgst3       | 4536 | 4  | 4  | 4  | 34   |  | 34   |  | 34   | 36.958  | 0.0000 | 60.109   | 22417000 | 150     | 16.99  | 15.89 | 16.81 | 15.95 | 16.02 | 14.67 | 16.05 | 13.52 |       |
| 3.590 | 1.34 | 2.54 | P10973 | Lymphocyte-specific protein 1                                                | Lap1        | 850  | 17 | 17 | 17 | 78.2 |  | 78.2 |  | 78.2 | 36.713  | 0.0000 | 323.31   | 56913000 | 349     | 18.16  | 18.52 | 17.83 | 18.12 | 17.11 | 16.75 | 16.73 | 16.66 |       |
| 1.454 | 1.34 | 2.54 | EPHYV6 | Histone-lysine N-methyltransferase                                           | N6t1a       | 1223 | 8  | 7  | 7  | 25.3 |  | 25.3 |  | 25.3 | 186.06  | 0.0000 | 13.41    | 3070900  | 44      | 15.84  | 15.10 | 15.44 | 15.44 | 15.77 | 15.71 | 15.71 | 15.71 |       |
| 1.454 | 1.34 | 2.53 | Q6P9N1 | Hcyen                                                                        | Hm26a       | 2588 | 7  | 7  | 7  | 25.5 |  | 25.5 |  | 25.5 | 78.371  | 0.0000 | 38.245   | 7042300  | 94      | 15.26  | 15.23 | 15.71 | 15.45 | 13.95 | 14.37 | 15.14 | 12.83 |       |
| 2.944 | 1.34 | 2.53 | Q70503 | Very-long-chain 3-oxoacyl-CoA reductase                                      | Hsd17b12    | 510  | 22 | 22 | 22 | 63.5 |  | 63.5 |  | 63.5 | 34.741  | 0.0000 | 323.31   | 23024000 | 674     | 19.29  | 18.42 | 18.76 | 18.75 | 17.68 | 17.36 | 17.72 | 17.10 |       |
| 1.162 | 1.31 | 2.52 | P11077 | Protoporphomycin alpha-3 chain                                               | Prp3        | 473  | 14 | 14 | 14 | 8    |  | 8    |  | 8    | 14.994  | 0.0000 | 304.24   | 11078000 | 380     | 18.53  | 18.01 | 18.44 | 18.44 | 16.88 | 17.61 | 17.61 | 17.61 |       |
| 2.578 | 1.34 | 2.52 | Q8CVK6 | Delta(24)-sterol reductase                                                   | Dhr24       | 3921 | 14 | 14 | 14 | 24.4 |  | 24.4 |  | 24.4 | 60.112  | 0.0000 | 42.376   | 10752000 | 75      | 15.98  | 15.02 | 15.51 | 15.26 | 14.06 | 14.67 | 14.64 | 14.28 |       |
| 1.665 | 1.34 | 2.52 | Q8BU88 | 39S ribosomal protein L22, mitochondrial                                     | Mpl22       | 3221 | 6  | 6  | 6  | 34.5 |  | 34.5 |  | 34.5 | 23.805  | 0.0000 | 19.264   | 13226000 | 64      | 17.39  | 16.11 | 17.36 | 17.34 | 14.90 | 15.94 | 15.70 | 16.31 |       |
| 2.894 | 1.33 | 2.52 | Q8T1M4 | Golgin subfamily A member 2                                                  | Golg2       | 4223 | 12 | 12 | 12 | 16.8 |  | 16.8 |  | 16.8 | 113.28  | 0.0000 | 29.806   | 6380900  | 64      | 15.40  | 15.03 | 14.84 | 15.20 | 14.18 | 13.67 | 14.10 | 13.20 |       |
| 1.040 | 1.33 | 2.52 | Q8Z821 | Activating signal transducer 1 complex subunit 1                             | Asat1       | 1273 | 9  | 9  | 9  | 17.4 |  | 17.4 |  | 17.4 | 41.278  | 0.0000 | 3.9257   | 48741000 | 174     | 14.02  | 15.10 | 15.40 | 15.40 | 14.52 | 14.52 | 14.52 | 14.52 |       |
| 1.988 | 1.33 | 2.51 | Q8D441 | Major facilitator superfamily domain-containing protein 10                   | Mfd10       | 4954 | 4  | 4  | 4  | 11.4 |  | 11.4 |  | 11.4 | 49.369  | 0.0000 | 15.459   | 21375000 | 125     | 17.17  | 16.66 | 16.85 | 17.07 | 16.17 | 14.77 | 16.17 | 15.35 |       |
| 2.707 | 1.33 | 2.51 | Q8B441 | Melanin-2                                                                    | Mf2         | 529  | 12 | 12 | 12 | 63.5 |  | 63.5 |  | 63.5 | 29.758  | 0.0000 | 323.31   | 25485000 | 126     | 17.23  | 16.79 | 17.22 | 17.33 | 16.19 | 15.17 | 16.00 | 15.90 |       |
| 1.057 | 1.33 | 2.50 | Q8R918 | L3 cell-like receptor 13                                                     | Lrr13       | 2113 | 19 | 19 | 19 | 21.5 |  | 21.5 |  | 21.5 | 160.93  | 0.0000 | 47.599   | 9239000  | 309     | 17.71  | 17.88 | 17.88 | 17.88 | 17.16 | 17.16 | 17.16 | 17.16 |       |
| 3.356 | 1.32 | 2.50 | Q9CWL9 | Nucleoporin Nup37                                                            | Nup37       | 4733 | 5  | 5  | 5  | 23   |  | 23   |  | 23   | 36.731  | 0.0000 | 17.641   | 3937000  | 35      | 14.69  | 15.09 | 14.84 | 14.91 | 13.75 | 13.53 | 13.87 | 13.09 |       |
| 3.452 | 1.32 | 2.50 | P97484 | Leukocyte immunoglobulin-like receptor subfamily B member 3                  | Lilrb3      | 1631 | 17 | 17 | 17 | 27.2 |  | 27.2 |  | 27.2 | 93.053  | 0.0000 | 235.99   | 29773000 | 318     | 16.67  | 16.17 | 16.15 | 16.15 | 15.26 | 14.86 | 15.06 | 14.65 |       |
| 2.139 | 1.32 | 2.49 | Q49X90 | Methionine--RNA ligase, mitochondrial                                        | Mmr14       | 2056 | 6  | 6  | 6  | 15   |  | 15   |  | 15   | 65.804  | 0.0000 | 28.539   | 2882600  | 52      | 14.25  | 14.00 | 14.64 | 14.30 | 12.10 | 13.12 | 13.20 | 13.50 |       |
| 1.250 | 1.32 | 2.49 | Q8DCC6 | Gammia-aminobutylic acid receptor-associated protein                         | Gabarp      | 5209 | 26 | 26 | 26 | 13.6 |  | 13.6 |  | 13.6 | 8.533   | 0.0000 | 8.154200 | 1542000  | 26      | 13.916 | 13.91 | 13.91 | 13.91 | 13.91 | 13.91 | 13.91 | 13.91 |       |
| 0.531 | 1.32 | 2.49 | Q9CQZ0 | Q9ORM1-like protein 2,ORM1-like protein                                      | Ormd2,Ormd1 | 4056 | 2  | 2  | 2  | 14.4 |  | 14.4 |  | 14.4 | 17.389  | 0.0000 | 42.929   | 20576000 | 100     | 17.31  | 16.95 | 17.36 | 17.43 | 16.78 | 12.54 | 17.16 | 17.32 |       |
| 1.378 | 1.32 | 2.49 | Q7PTP0 | Integrator complex subunit 3                                                 | Int3        | 2766 | 7  | 7  | 7  | 12   |  | 12   |  | 12   | 117.94  | 0.0000 | 166.63   | 5117900  | 75      | 15.56  | 15.05 | 15.29 | 14.44 | 14.73 | 12.55 | 14.67 | 14.14 |       |
| 1.104 | 1.32 | 2.49 | P55086 | ATP-binding cassette family D member 3                                       | Abcd3       | 1293 | 19 | 19 | 19 | 19.9 |  | 19.9 |  | 19.9 | 129.474 | 0.0000 | 129.474  | 22956000 | 229     | 15.62  | 15.90 | 16.40 | 16.40 | 15.62 | 15.62 | 15.62 | 15.62 |       |
| 0.967 | 1.31 | 2.48 | Q8D938 | Transmembrane protein 160                                                    | Tmem160     | 5093 | 3  | 3  | 3  | 16.5 |  | 16.5 |  | 16.5 | 19.587  | 0.0011 | 3.6272   | 5912200  | 41      | 15.59  | 15.41 | 15.64 | 15.06 | 14.72 | 14.27 | 15.63 | 13.65 |       |
| 1.992 | 1.31 | 2.48 | Q8B298 | Dynamin-3                                                                    | Dnm3        | 3311 | 18 | 4  | 4  | 17.8 |  | 5.2  |  | 5.2  | 97.189  | 0.0000 | 14.961   | 14447000 | 82      | 16.45  | 16.19 | 16.52 | 16.30 | 15.43 | 15.02 | 15.67 | 14.10 |       |
| 1.001 | 1.31 | 2.48 | Q8D1C5 | Protein bicucullin D homolog 2                                               | Bicd2       | 4217 | 8  | 8  | 8  | 12.8 |  | 12.8 |  | 12.8 | 93.39   |        |          |          |         |        |       |       |       |       |       |       |       |       |

|  |       |      |      |         |                                                                |          |      |    |    |    |       |       |        |         |        |           |           |          |       |       |       |       |       |       |       |       |       |
|--|-------|------|------|---------|----------------------------------------------------------------|----------|------|----|----|----|-------|-------|--------|---------|--------|-----------|-----------|----------|-------|-------|-------|-------|-------|-------|-------|-------|-------|
|  | 1.285 | 1.23 | 2.35 | Q91W89  | Alpha-mannosidase 2C1                                          | Man2c1   | 4097 | 15 | 15 | 15 | 18.6  | 18.6  | 18.6   | 115.69  | 0.0000 | 151.58    | 15687000  | 162      | 15.92 | 15.33 | 15.55 | 15.67 | 15.29 | 14.31 | 14.91 | 13.03 |       |
|  | 1.878 | 1.23 | 2.35 | Q924L1  | LETM1 domain-containing protein 1                              | Letm1d   | 4296 | 14 | 14 | 14 | 38.9  | 38.9  | 38.9   | 38.9    | 41.7   | 0.0000    | 57.22     | 17924000 | 140   | 15.84 | 14.76 | 15.39 | 15.16 | 14.24 | 13.56 | 14.74 | 13.69 |
|  | 0.957 | 1.22 | 2.34 | Q0ESJ4  | NCK1-interacting protein with SH3 domain                       | Nckipd   | 5338 | 10 | 10 | 10 | 40.4  | 39.9  | 38.9   | 78.572  | 0.0000 | 18.628    | 56104000  | 59       | 15.13 | 15.07 | 15.33 | 14.97 | 14.21 | 14.32 | 15.04 | 12.03 |       |
|  | 2.832 | 1.22 | 2.34 | Q8C896  | Ras association domain-containing protein 4                    | Rasf4    | 3424 | 13 | 11 | 11 | 40.4  | 41.3  | 41.3   | 36.934  | 0.0000 | 28.702    | 10030000  | 51       | 16.01 | 15.92 | 15.33 | 15.73 | 14.86 | 14.80 | 14.79 | 14.03 |       |
|  | 3.182 | 1.22 | 2.33 | Q8CHH9  | Septin-8                                                       | Septd8   | 3523 | 21 | 14 | 13 | 56.2  | 44.3  | 44.3   | 49.812  | 0.0000 | 135.3     | 28268000  | 204      | 17.03 | 16.70 | 16.93 | 16.94 | 15.72 | 15.41 | 16.16 | 15.43 |       |
|  | 1.486 | 1.22 | 2.33 | Q8C2B0  | Succinate dehydrogenase cytochrome b560 subunit, mitochondrial | Sdhc     | 4824 | 1  | 1  | 1  | 7.1   | 7.1   | 7.1    | 18.382  | 0.0018 | 3.153     | 1858800   | 38       | 14.60 | 14.08 | 13.64 | 13.35 | 13.06 | 12.43 | 11.84 | 13.42 |       |
|  | 3.101 | 1.22 | 2.33 | Q8D7M9  | Nichitin                                                       | Nichn    | 2868 | 27 | 27 | 27 | 23.1  | 23.1  | 175.01 | 0.0000  | 198.93 | 30621000  | 352       | 16.57    | 15.85 | 16.73 | 16.41 | 15.18 | 15.12 | 15.28 | 15.10 |       |       |
|  | 1.348 | 1.22 | 2.33 | P01169  | Alpha-galactosidase A                                          | Gla      | 1197 | 12 | 12 | 12 | 11.97 | 11.97 | 47.942 | 0.0000  | 69.169 | 82181000  | 70        | 16.26    | 16.22 | 16.30 | 16.26 | 16.07 | 16.40 | 16.27 | 16.00 |       |       |
|  | 2.490 | 1.22 | 2.33 | Q8B8P0  | Aspartate--tRNA ligase, mitochondrial                          | Dars2    | 3063 | 5  | 5  | 5  | 10.6  | 10.6  | 10.6   | 14.701  | 0.0000 | 9.2322    | 3860700   | 47       | 14.52 | 14.37 | 15.18 | 14.89 | 13.11 | 13.54 | 13.99 | 13.46 |       |
|  | 2.099 | 1.22 | 2.33 | Q8B2D7  | Anaphase-promoting complex subunit 2                           | Anapc2   | 1317 | 2  | 2  | 2  | 3.6   | 3.6   | 95.306 | 0.0000  | 10.186 | 2868600   | 56        | 14.40    | 13.79 | 14.53 | 13.35 | 12.99 | 12.40 | 13.04 | 12.76 |       |       |
|  | 1.51  | 1.22 | 2.33 | P02620  | Chaperpin G                                                    | ChapG    | 945  | 10 | 10 | 10 | 3.3   | 3.3   | 3.3    | 20.095  | 0.0000 | 33.9      | 30984000  | 171      | 15.98 | 15.98 | 16.03 | 16.03 | 15.98 | 16.04 | 15.98 | 16.02 |       |
|  | 1.289 | 1.21 | 2.32 | Q2YDV2  | Protein misato homolog 1                                       | Mtso1    | 1804 | 9  | 9  | 9  | 25.9  | 25.9  | 25.9   | 61.23   | 0.0000 | 33.596    | 5535400   | 37       | 14.63 | 13.46 | 15.18 | 15.08 | 12.22 | 12.92 | 13.44 | 12.91 |       |
|  | 1.867 | 1.21 | 2.32 | Q8VDQ5  | Phosphoglucothioate--cysteine ligase                           | Ppccs    | 3952 | 3  | 3  | 3  | 14.8  | 14.8  | 33.794 | 0.0000  | 7.9895 | 2526900   | 19        | 15.08    | 14.81 | 15.25 | 14.20 | 13.05 | 13.59 | 14.32 | 13.52 |       |       |
|  | 1.063 | 1.21 | 2.31 | Q8UC7J9 | U3 small nuclear RNA-associated protein 15 homolog             | Utpj3    | 3416 | 7  | 7  | 7  | 18.8  | 18.8  | 18.8   | 59.574  | 0.0000 | 32.057    | 100747000 | 98       | 16.10 | 15.83 | 15.95 | 16.02 | 14.47 | 14.72 | 15.61 | 14.28 |       |
|  | 3.039 | 1.21 | 2.31 | Q8D6F0  | Receptor expression-enhancing protein 5                        | Reep5    | 2217 | 11 | 11 | 11 | 27    | 27    | 27     | 21.05   | 0.0000 | 240       | 113120000 | 507      | 15.86 | 17.94 | 18.10 | 18.45 | 17.09 | 17.86 | 17.43 | 16.84 |       |
|  | 1.661 | 1.21 | 2.32 | Q89KU0  | Vacuole membrane protein 1                                     | Vmp1     | 4395 | 3  | 3  | 3  | 12.6  | 12.6  | 12.6   | 45.96   | 0.0000 | 38.841    | 9302700   | 60       | 16.44 | 15.37 | 16.70 | 16.47 | 14.91 | 14.71 | 15.80 | 14.71 |       |
|  | 0.980 | 1.21 | 2.32 | P24788  | Cyclin-dependent kinase 11B                                    | Cdk11b   | 903  | 12 | 12 | 12 | 14.5  | 14.5  | 14.5   | 91.512  | 0.0000 | 19.155    | 7655300   | 62       | 15.58 | 14.71 | 15.27 | 15.80 | 14.73 | 15.07 | 14.82 | 12.45 |       |
|  | 2.094 | 1.21 | 2.32 | Q8C547  | HEAT repeat-containing protein 5B                              | Heatrb   | 3392 | 23 | 23 | 23 | 17.6  | 17.6  | 17.6   | 224.32  | 0.0000 | 81.041    | 14416900  | 158      | 15.26 | 14.20 | 15.32 | 14.99 | 14.03 | 13.22 | 13.88 | 13.78 |       |
|  | 0.877 | 1.21 | 2.31 | Q505B7  | Protein arcease                                                | Zbtb8os  | 2078 | 2  | 2  | 2  | 17.9  | 17.9  | 17.9   | 19.727  | 0.0002 | 5.2571    | 1228500   | 16       | 13.78 | 12.91 | 14.59 | 15.60 | 12.16 | 14.00 | 12.68 | 13.20 |       |
|  | 1.173 | 1.21 | 2.31 | Q8VCY6  | U3 small nuclear RNA-associated protein 6 homolog              | Utpj6    | 3937 | 3  | 3  | 3  | 8.4   | 8.4   | 8.4    | 70.429  | 0.0000 | 30.576    | 2862900   | 43       | 14.27 | 13.59 | 15.48 | 14.38 | 13.30 | 12.73 | 14.25 | 12.60 |       |
|  | 1.253 | 1.21 | 2.31 | Q8UC7J9 | U3 small nuclear RNA-associated protein 15 homolog             | Utpj3    | 3416 | 7  | 7  | 7  | 18.8  | 18.8  | 18.8   | 59.574  | 0.0000 | 32.057    | 100747000 | 98       | 16.10 | 15.83 | 15.95 | 16.02 | 14.47 | 14.72 | 15.61 | 14.28 |       |
|  | 1.645 | 1.21 | 2.31 | Q8KAK7  | 1-acyl-sn-glycerol-3-phosphate acyltransferase delta           | Agpat4   | 3729 | 11 | 11 | 11 | 24.9  | 24.9  | 24.9   | 43.81   | 0.0000 | 26.729    | 11661000  | 97       | 15.78 | 14.55 | 16.13 | 15.87 | 14.37 | 14.25 | 14.87 | 14.00 |       |
|  | 1.125 | 1.21 | 2.31 | Q8D8V7  | Signal peptidase complex catalytic subunit SEC11C              | Sec11c   | 5078 | 6  | 6  | 6  | 33.3  | 33.3  | 33.3   | 21.66   | 0.0000 | 50.162    | 4910500   | 47       | 13.99 | 13.87 | 15.07 | 15.04 | 14.18 | 12.35 | 13.95 | 12.66 |       |
|  | 1.272 | 1.20 | 2.30 | P97872  | Dimethylamine monooxygenase [N-oxide-forming] 5                | Fmo5     | 1683 | 4  | 4  | 4  | 11.3  | 11.3  | 11.3   | 60      | 0.0004 | 5.911     | 7241600   | 40       | 15.55 | 15.21 | 15.65 | 15.89 | 15.33 | 13.39 | 14.85 | 14.61 |       |
|  | 1.347 | 1.20 | 2.30 | Q81951  | Calcium uniporter regulatory subunit MCUb, mitochondrial       | Ccdc109b | 2931 | 9  | 9  | 9  | 38.6  | 38.6  | 38.6   | 39.769  | 0.0000 | 108.09    | 14159000  | 104      | 16.61 | 14.94 | 16.28 | 16.62 | 15.17 | 15.48 | 14.31 | 14.68 |       |
|  | 2.565 | 1.20 | 2.30 | Q8DCJ1  | Target of rapamycin complex subunit LST8                       | Mi18     | 1266 | 8  | 8  | 7  | 39    | 39    | 31.35  | 35.851  | 0.0000 | 20.891    | 6235100   | 71       | 15.54 | 15.31 | 16.56 | 15.28 | 14.52 | 13.87 | 14.75 | 13.85 |       |
|  | 1.182 | 1.20 | 2.30 | Q871G4  | Protein In-54 homolog                                          | Lins4    | 2091 | 4  | 4  | 4  | 11.2  | 11.2  | 11.2   | 79.565  | 0.0002 | 6.188     | 3035700   | 22       | 14.43 | 15.28 | 15.29 | 13.79 | 12.36 | 14.07 | 13.97 | 13.59 |       |
|  | 1.743 | 1.20 | 2.30 | Q81514  | DNA-directed RNA polymerase I subunit RPA1                     | Rpa1     | 3411 | 7  | 7  | 7  | 7.3   | 7.3   | 7.3    | 19.4    | 0.0000 | 26.663    | 3268600   | 43       | 14.51 | 14.51 | 15.08 | 15.08 | 14.08 | 14.25 | 14.77 | 14.08 |       |
|  | 1.753 | 1.20 | 2.30 | Q8U3K5  | Rab-like protein 6                                             | Rab6l    | 1862 | 7  | 7  | 7  | 13.9  | 13.9  | 13.9   | 79.833  | 0.0000 | 11.85     | 4612500   | 45       | 14.88 | 14.11 | 15.10 | 14.78 | 13.73 | 12.61 | 13.84 | 13.88 |       |
|  | 3.026 | 1.20 | 2.29 | P58137  | Acyl-coenzyme A thioesterase 8                                 | Aco8     | 1309 | 10 | 10 | 10 | 42.2  | 42.2  | 42.2   | 35.827  | 0.0000 | 84.619    | 10959000  | 87       | 15.53 | 15.20 | 15.82 | 15.46 | 14.13 | 14.09 | 14.75 | 14.25 |       |
|  | 2.292 | 1.20 | 2.29 | Q8C896  | RNA (guanine-N7)-methyltransferase non-catalytic subunit WD44  | Wdr4     | 5242 | 11 | 11 | 11 | 44.1  | 44.1  | 44.1   | 51.503  | 0.0000 | 54.610100 | 14.75     | 15.49    | 15.42 | 15.49 | 15.49 | 15.49 | 15.49 | 15.49 | 15.49 |       |       |
|  | 0.751 | 1.20 | 2.29 | Q8VCL2  | Protein SCQ2 homolog, mitochondrial                            | Scq2     | 1302 | 5  | 5  | 5  | 25.4  | 25.4  | 25.4   | 29.844  | 0.0000 | 16.826    | 2261300   | 66       | 15.25 | 14.90 | 15.60 | 15.27 | 14.56 | 14.70 | 15.15 | 11.79 |       |
|  | 2.060 | 1.19 | 2.29 | Q9WVL0  | Maleylacetoacetate isomerase                                   | Gat2     | 5753 | 3  | 3  | 3  | 19.4  | 19.4  | 19.4   | 24.275  | 0.0000 | 157.71    | 6361600   | 50       | 15.43 | 15.14 | 16.29 | 15.90 | 14.37 | 14.20 | 15.03 | 14.40 |       |
|  | 1.529 | 1.19 | 2.28 | Q8C561  | LMNB1 domain-containing protein 2                              | Lmbn2    | 3393 | 8  | 8  | 8  | 14.3  | 14.3  | 14.3   | 81.1    | 0.0000 | 159.72    | 4103800   | 53       | 13.99 | 12.98 | 14.54 | 14.56 | 12.58 | 13.14 | 12.39 | 13.19 |       |
|  | 2.292 | 1.19 | 2.28 | Q8C157  | Protein endoplegin-1                                           | Plepl    | 2512 | 11 | 11 | 11 | 26.8  | 26.8  | 26.8   | 103.187 | 0.0000 | 83.775    | 72433000  | 140      | 13.70 | 14.58 | 15.08 | 15.08 | 14.70 | 14.58 | 15.08 | 15.08 |       |
|  | 2.819 | 1.19 | 2.28 | P70699  | Protein alpha-glucosidase                                      | Gaa      | 1587 | 19 | 19 | 19 | 21.4  | 26.8  | 26.8   | 106.25  | 0.0000 | 194.04    | 39876000  | 367      | 16.37 | 16.39 | 16.75 | 16.66 | 15.76 | 16.43 | 15.48 | 15.33 |       |
|  | 2.853 | 1.19 | 2.28 | P97814  | Lysosomal serine-threonine phosphatase-interacting protein 1   | Ptip1p1  | 1675 | 17 | 17 | 17 | 32.5  | 32.5  | 32.5   | 47.59   | 0.0000 | 194.68    | 38411000  | 246      | 17.00 | 16.64 | 16.91 | 16.77 | 15.59 | 15.10 | 15.98 | 15.89 |       |
|  | 1.954 | 1.19 | 2.28 | Q8C896  | RNA (guanine-N7)-methyltransferase non-catalytic subunit WD44  | Wdr4     | 5242 | 11 | 11 | 11 | 44.1  | 44.1  | 44.1   | 51.503  | 0.0000 | 54.610100 | 14.75     | 15.49    | 15.42 | 15.49 | 15.49 | 15.49 | 15.49 | 15.49 | 15.49 |       |       |
|  | 3.292 | 1.19 | 2.27 | Q70551  | QZSRSP protein kinase 1                                        | Srp1     | 512  | 7  | 5  | 5  | 12.8  | 10.2  | 10.2   | 73.088  | 0.0008 | 4.1129    | 1921400   | 24       | 13.90 | 13.89 | 13.97 | 14.40 | 12.92 | 12.98 | 12.49 | 13.05 |       |
|  | 0.985 | 1.19 | 2.27 | Q8RSF7  | Interferon-induced helicase C domain-containing protein 1      | Ifih1    | 3887 | 30 | 30 | 29 | 36.2  | 36.2  | 36.2   | 115.97  | 0.0000 | 84.3      | 31479000  | 182      | 18.03 | 17.12 | 17.25 | 16.53 | 16.87 | 16.04 | 16.74 | 14.54 |       |
|  | 1.204 | 1.19 | 2.27 | Q8BY89  | Protein O-glucosyltransferase 1                                | Poglut1  | 3296 | 7  | 7  | 7  | 19.6  | 19.6  | 19.6   | 46.379  | 0.0000 | 14.095    | 10203000  | 91       | 16.26 | 15.71 | 15.87 | 15.59 | 14.99 | 15.25 | 15.26 | 13.19 |       |
|  | 1.354 | 1.18 | 2.27 | Q8URF8  | BTB/POZ domain-containing protein KCTD21                       | Kctd21   | 3296 | 11 | 11 | 11 | 10.2  | 10.2  | 10.2   | 12.8    | 0.0000 | 12.8      | 9900700   | 34       | 16.96 | 16.97 | 17.02 | 17.02 | 16.96 | 16.97 | 17.02 | 17.02 |       |
|  | 2.220 | 1.18 | 2.27 | Q8VDQ1  | Prostaglandin reductase 2                                      | Prg2     | 3967 | 22 | 22 | 22 | 22.2  | 22.2  | 22.2   | 38.9    | 0.0000 | 323.31    | 84315000  | 357      | 16.88 | 17.52 | 17.85 | 17.24 | 16.42 | 15.65 | 16.56 | 16.13 |       |
|  | 1.985 | 1.18 | 2.27 | Q8C896  | RNA (guanine-N7)-methyltransferase non-catalytic subunit WD44  | Wdr4     | 5242 | 11 | 11 | 11 | 44.1  | 44.1  | 44.1   | 51.503  | 0.0000 | 54.610100 | 14.75     | 15.49    | 15.42 | 15.49 | 15.49 | 15.49 | 15.49 | 15.49 | 15.49 |       |       |
|  | 0.651 | 1.18 | 2.26 | Q3UPH1  | Protein PRRC1                                                  | Prrc1    | 2014 | 10 | 10 | 10 | 33.9  | 33.9  | 33.9   | 39.407  | 0.0000 | 149.69    | 25625000  | 166      | 16.69 | 16.43 | 16.40 | 16.45 | 16.19 | 16.36 | 15.98 | 12.73 |       |
|  | 0.832 | 1.18 | 2.26 | Q8B907  | EC SUMO-protein ligase PIAS1                                   | Pias1    | 5033 | 4  | 4  | 4  | 8.9   | 8.9   | 8.9    | 7.167   | 0.0000 | 18.798    | 4264800   | 21       | 14.67 | 14.16 | 15.65 | 15.45 | 14.92 | 14.39 | 14.44 | 14.39 |       |
|  | 2.316 | 1.18 | 2.26 | Q8D7J6  | Deoxyribonuclease-1-like 1                                     | Dnae11   | 5054 | 5  | 5  | 5  | 19.4  | 19.4  | 19.4   | 35.604  | 0.0000 | 56.793    | 3741400   | 62       | 14.20 | 14.54 | 14.74 | 14.56 | 13.82 | 13.16 | 13.63 | 12.72 |       |
|  | 1.271 | 1.18 | 2.26 | Q8R0D0  | Peroxisomal acyl-coenzyme A oxidase 1                          | Acox1    | 5608 | 20 | 20 | 20 | 42.8  | 42.8  | 42.8   | 74.648  | 0.0000 | 90.093    | 15483000  | 120      | 14.57 | 14.61 | 15.15 | 15.15 | 14.57 | 14.57 | 14.57 | 14.57 |       |
|  | 1.154 | 1.18 | 2.26 | Q       |                                                                |          |      |    |    |    |       |       |        |         |        |           |           |          |       |       |       |       |       |       |       |       |       |



|  |       |      |      |         |                                                                     |          |      |    |    |      |       |       |        |        |         |          |        |           |          |       |       |       |       |       |       |       |       |       |
|--|-------|------|------|---------|---------------------------------------------------------------------|----------|------|----|----|------|-------|-------|--------|--------|---------|----------|--------|-----------|----------|-------|-------|-------|-------|-------|-------|-------|-------|-------|
|  | 1.375 | 1.00 | 2.00 | Q64430  | Copper-transporting ATPase 1                                        | Atp7a    | 2440 | 10 | 4  | 10   | 10.9  | 10.9  | 10.9   | 10.9   | 161.96  | 0.0000   | 104.92 | 8133400   | 147      | 15.18 | 14.80 | 15.76 | 15.57 | 14.80 | 13.49 | 15.02 | 14.21 |       |
|  | 0.660 | 1.00 | 2.00 | Q68942  | Nuclear factor of activated T-cells, cytoplasmic 1                  | Nfya1    | 586  | 4  | 4  | 4    | 14.2  | 14.2  | 14.2   | 14.2   | 77.832  | 0.0000   | 70.972 | 2228500   | 48       | 13.95 | 13.77 | 13.69 | 14.20 | 11.97 | 11.97 | 12.68 | 15.00 |       |
|  | 2.802 | 0.99 | 1.99 | Q6WU2L  | Serine/threonine-protein kinase TBK1                                | Tbk1     | 518  | 26 | 26 | 26   | 44    | 44    | 44     | 44     | 83.424  | 0.0000   | 29.155 | 5059200   | 365      | 17.27 | 16.93 | 17.57 | 17.47 | 16.28 | 16.21 | 16.65 | 16.13 |       |
|  | 2.307 | 0.99 | 1.99 | Q61283  | Sterol O-acyltransferase 1                                          | Soat1    | 2287 | 11 | 11 | 11   | 25.2  | 25.2  | 25.2   | 25.2   | 132.798 | 0.0000   | 32.331 | 21328000  | 499      | 17.08 | 16.50 | 17.32 | 17.08 | 17.47 | 17.81 | 18.44 | 17.60 |       |
|  | 1.261 | 0.99 | 1.99 | Q5CXY1  | Transmembrane protein 175                                           | Tmem175  | 4773 | 3  | 3  | 3    | 7.8   | 7.8   | 7.8    | 7.8    | 55.577  | 0.0000   | 44.838 | 2222500   | 39       | 13.03 | 12.93 | 14.02 | 13.99 | 12.73 | 12.67 | 12.96 | 11.64 |       |
|  | 2.643 | 0.99 | 1.99 | P31750  | RAC-alpha serine/threonine-protein kinase                           | Akt1     | 989  | 19 | 19 | 16   | 47.7  | 47.7  | 47.7   | 47.7   | 37.9    | 55.707   | 0.0000 | 151.04    | 39811000 | 288   | 16.87 | 16.54 | 16.63 | 16.96 | 15.91 | 15.81 | 16.05 | 15.27 |
|  | 1.893 | 0.99 | 1.99 | P08185  | Probable phospholipid-transfering A1Phase IIB                       | Alpib    | 1689 | 10 | 10 | 10   | 11.8  | 11.8  | 12.02  | 0.0000 | 24.473  | 8462800  | 67     | 15.61     | 14.87    | 16.12 | 15.83 | 14.55 | 14.38 | 14.84 | 14.89 |       |       |       |
|  | 1.057 | 0.99 | 1.99 | Q6B004  | Oxidized-binding protein-related protein 2                          | Osbp2    | 3202 | 9  | 9  | 9    | 31.6  | 31.6  | 31.6   | 31.6   | 55.384  | 0.0000   | 58.765 | 5104800   | 72       | 14.03 | 13.30 | 13.69 | 14.42 | 12.39 | 12.48 | 15.19 | 14.21 |       |
|  | 1.916 | 0.99 | 1.99 | Q5SW19  | Clustered mitochondria protein homolog                              | Ctuh3    | 1153 | 17 | 17 | 17   | 17.3  | 17.3  | 17.3   | 17.3   | 11.3    | 148.07   | 0.0000 | 43.816    | 12518000 | 129   | 15.35 | 14.70 | 15.23 | 15.22 | 14.75 | 14.08 | 14.11 | 13.58 |
|  | 2.337 | 0.99 | 1.99 | P70202  | Lactacin                                                            | Lxn      | 1535 | 4  | 4  | 4    | 25.7  | 25.7  | 25.7   | 25.7   | 25.2    | 25.492   | 0.0000 | 42.938    | 8868400  | 68    | 15.66 | 15.63 | 15.86 | 15.62 | 14.19 | 14.49 | 15.14 | 14.98 |
|  | 0.951 | 0.99 | 1.99 | Q619B4  | Hermansky-Pudlak syndrome 3 protein homolog                         | Dtdn     | 2233 | 9  | 9  | 9    | 13.18 | 13.18 | 13.18  | 13.18  | 6.1     | 115.764  | 0.0000 | 10.764    | 3603300  | 74    | 13.12 | 13.04 | 13.22 | 13.46 | 12.20 | 12.46 | 13.30 | 12.68 |
|  | 1.003 | 0.99 | 1.99 | Q69L20  |                                                                     | Gat43    | 4403 | 9  | 9  | 9    | 45.2  | 45.2  | 45.2   | 45.2   | 25.7    | 42.903   | 0.0000 | 17996000  | 68       | 17.47 | 16.58 | 17.17 | 16.13 | 16.14 | 16.19 | 16.56 | 14.83 |       |
|  | 3.123 | 0.99 | 1.99 | Q6R0P6  | Signal peptidase complex catalytic subunit SEC11A                   | Sec11a   | 5634 | 11 | 11 | 11   | 35.2  | 35.2  | 35.2   | 35.2   | 20.626  | 0.0000   | 76.865 | 64196000  | 401      | 18.35 | 17.81 | 18.18 | 18.40 | 17.27 | 16.95 | 17.35 | 17.22 |       |
|  | 1.778 | 0.99 | 1.99 | Q60687  | Brf1uncione 3-phosphoadenosine 5-phosphatidylase synthase 1(Sulfate | Papsa1   | 2230 | 14 | 13 | 13   | 32.4  | 32.4  | 32.4   | 32.4   | 118.53  | 0.0000   | 118.53 | 19820000  | 232      | 16.66 | 15.89 | 15.56 | 15.82 | 15.56 | 15.44 | 14.81 | 14.54 |       |
|  | 1.784 | 0.99 | 1.99 | Q6BY67  | Ubiquitin carboxyl-terminal hydrolase 47                            | Ubr47    | 3294 | 20 | 20 | 20   | 22.6  | 22.6  | 22.6   | 22.6   | 197.45  | 0.0000   | 51.801 | 18988000  | 161      | 16.04 | 15.49 | 16.38 | 15.98 | 15.15 | 15.18 | 15.42 | 14.61 |       |
|  | 3.736 | 0.99 | 1.99 | Q11011  | Puromycin-sensitive aminopyrophosphatase                            | Nppeps   | 1782 | 50 | 50 | 50   | 56.7  | 56.7  | 56.7   | 56.7   | 103.32  | 0.0000   | 323.31 | 144400000 | 1046     | 17.46 | 17.32 | 17.67 | 17.60 | 16.48 | 16.41 | 16.80 | 16.41 |       |
|  | 1.095 | 0.99 | 1.99 | Q6CM3   | D-2-hydroxyglutarate dehydrogenase, mitochondrial                   | D2ghh    | 3558 | 5  | 5  | 5    | 15.7  | 15.7  | 15.7   | 15.7   | 58.575  | 0.0000   | 19.516 | 2763800   | 19       | 14.79 | 15.59 | 14.84 | 15.31 | 13.45 | 15.39 | 13.83 | 13.82 |       |
|  | 0.928 | 0.99 | 1.99 | Q6Q258  | Dynactin subunit 5                                                  | Dctn5    | 5590 | 5  | 5  | 5    | 18.7  | 18.7  | 18.7   | 18.7   | 20.14   | 0.0000   | 55.292 | 5529100   | 47       | 15.93 | 15.32 | 15.44 | 15.95 | 14.93 | 15.39 | 15.43 | 13.28 |       |
|  | 0.279 | 0.98 | 1.98 | Q6C142  | TBC1 domain family member 2A                                        | Tbc1d2   | 69   | 19 | 19 | 19   | 24.9  | 24.9  | 24.9   | 24.9   | 104.26  | 0.0000   | 41.354 | 16057000  | 115      | 15.89 | 15.35 | 16.07 | 16.44 | 13.79 | 14.51 | 15.91 | 15.61 |       |
|  | 1.068 | 0.98 | 1.98 | Q6Q2H9  | Low density lipoprotein receptor adapter protein 1                  | Ldbrap1  | 3351 | 4  | 4  | 4    | 21.1  | 21.1  | 21.1   | 21.1   | 13.975  | 0.0000   | 10.806 | 9718100   | 39       | 16.74 | 16.57 | 13.04 | 16.61 | 16.99 | 13.01 | 17.08 | 12.55 |       |
|  | 3.296 | 0.98 | 1.98 | P12815  | NEDD4-like E3 ubiquitin-protein ligase WWP2                         | Wwp2     | 5156 | 8  | 8  | 8    | 6.3   | 6.3   | 6.3    | 6.3    | 98.76   | 0.0000   | 29.72  | 1723200   | 35       | 14.10 | 13.74 | 13.68 | 12.96 | 12.75 | 11.45 | 12.97 | 15.31 |       |
|  | 1.936 | 0.98 | 1.98 | Q6C0P5  | Programmed cell death protein 6                                     | Pdc6f    | 760  | 10 | 10 | 10   | 72.3  | 72.3  | 72.3   | 72.3   | 21.867  | 0.0000   | 232.34 | 55287000  | 297      | 17.43 | 16.93 | 17.37 | 17.39 | 16.38 | 16.05 | 16.42 | 16.35 |       |
|  | 1.474 | 0.98 | 1.98 | Q6B0W7  | Coronin-2A                                                          | Coro2a   | 3346 | 14 | 14 | 13   | 28.1  | 28.1  | 28.1   | 28.1   | 59.573  | 0.0000   | 37.799 | 43870000  | 124      | 19.08 | 17.92 | 18.40 | 18.22 | 17.25 | 17.62 | 17.17 | 17.64 |       |
|  | 3.080 | 0.98 | 1.97 | P18161  | Arf-GAP domain and FG repeat-containing protein 2                   | Arfg2    | 2860 | 7  | 5  | 5    | 20    | 17.7  | 48.967 | 0.0000 | 34.835  | 10943000 | 109    | 16.19     | 15.91    | 15.09 | 15.23 | 15.08 | 14.30 | 14.99 | 14.12 |       |       |       |
|  | 4.067 | 0.98 | 1.97 | Q1V1J4  | CD44 antigen                                                        | CD44     | 835  | 9  | 8  | 8    | 33.8  | 33.8  | 33.8   | 33.8   | 27.383  | 0.0000   | 35.308 | 25680000  | 498      | 16.22 | 16.50 | 16.29 | 16.45 | 15.54 | 15.16 | 15.71 | 15.12 |       |
|  | 1.628 | 0.98 | 1.97 | Q6R1T4  | Serine/threonine-protein kinase 38                                  | Slk38    | 4065 | 23 | 20 | 46   | 46    | 46    | 46     | 46     | 54.174  | 0.0000   | 134.86 | 44681000  | 468      | 16.26 | 16.00 | 16.18 | 16.12 | 15.11 | 15.26 | 15.34 | 14.93 |       |
|  | 0.404 | 0.98 | 1.97 | Q6R1T4  | Septin-6                                                            | Sept6    | 1664 | 18 | 9  | 38.2 | 21.9  | 18.7  | 49.619 | 0.0000 | 15.043  | 4177100  | 59     | 14.80     | 14.34    | 13.66 | 13.71 | 13.57 | 13.51 | 12.47 | 13.05 |       |       |       |
|  | 0.624 | 0.98 | 1.97 | Q6C546  | Solute carrier family 25 member 46                                  | Slc25a46 | 4908 | 5  | 23 | 7    | 23    | 17.3  | 17.3   | 17.3   | 17.3    | 15.072   | 0.0000 | 4.2065    | 23671000 | 20    | 13.60 | 14.13 | 13.36 | 14.24 | 13.78 | 12.09 | 11.73 | 14.82 |
|  | 1.937 | 0.98 | 1.97 | Q6JLV5  | DNA-directed RNA polymerases I and III subunit RPA2C2               | Po1r1d   | 5619 | 2  | 2  | 2    | 13.2  | 32.2  | 32.2   | 32.2   | 88.947  | 0.0000   | 109.48 | 24851000  | 235      | 16.48 | 16.05 | 16.44 | 16.53 | 15.80 | 15.51 | 15.81 | 14.68 |       |
|  | 0.439 | 0.97 | 1.97 | Q6W076  | Cullin-3                                                            | Cul3     | 5491 | 21 | 21 | 21   | 32.2  | 32.2  | 32.2   | 32.2   | 88.947  | 0.0000   | 109.48 | 24851000  | 235      | 16.48 | 16.05 | 16.44 | 16.53 | 15.80 | 15.51 | 15.81 | 14.68 |       |
|  | 1.273 | 0.97 | 1.97 | Q6JLV5  | ArhGAP2                                                             | Arhgap2  | 5745 | 8  | 4  | 4    | 14.2  | 14.2  | 14.2   | 14.2   | 95.351  | 0.0000   | 16.856 | 9925300   | 31       | 16.36 | 15.64 | 15.51 | 15.57 | 13.60 | 16.79 | 16.11 | 12.91 |       |
|  | 3.674 | 0.97 | 1.97 | Q6C0N1  | Glycosyltransferase 8 domain-containing protein 1                   | Glt8d1   | 2527 | 3  | 3  | 3    | 8.1   | 8.1   | 8.1    | 8.1    | 41.99   | 0.0000   | 6.589  | 1891000   | 26       | 14.04 | 13.73 | 15.20 | 14.01 | 13.99 | 13.44 | 13.03 | 12.93 |       |
|  | 1.61  | 0.97 | 1.97 | Q6C0N1  | Heat shock protein 75 KDa, mitochondrial                            | Hsp75    | 4614 | 34 | 34 | 34   | 56.7  | 56.7  | 56.7   | 56.7   | 80.208  | 0.0000   | 323.31 | 142070000 | 930      | 18.52 | 18.27 | 18.71 | 18.54 | 17.60 | 17.45 | 17.74 | 17.37 |       |
|  | 2.488 | 0.97 | 1.97 | Q6C0N1  | Dehydrogenase subunit SDR family member 7                           | Drh7     | 4703 | 12 | 9  | 8    | 31.9  | 31.9  | 31.9   | 31.9   | 16.167  | 0.0000   | 24.901 | 21702000  | 163      | 16.55 | 16.31 | 16.82 | 16.59 | 15.82 | 15.82 | 15.82 | 15.82 |       |
|  | 0.724 | 0.97 | 1.97 | Q6A670  | Calpi transamidase component PIG-5                                  | Pigs     | 2169 | 11 | 11 | 11   | 34.2  | 34.2  | 34.2   | 34.2   | 61.71   | 0.0000   | 115.2  | 14674000  | 108      | 15.79 | 15.18 | 16.03 | 15.95 | 14.90 | 14.57 | 14.85 | 14.73 |       |
|  | 3.17  | 0.97 | 1.97 | Q6B0V0  | Calcium signal-modulating cytoplasmic ligand                        | Camlg    | 1504 | 4  | 4  | 4    | 23.8  | 23.8  | 23.8   | 23.8   | 32.542  | 0.0000   | 80.231 | 7273400   | 48       | 15.99 | 15.73 | 16.06 | 15.74 | 15.17 | 15.31 | 16.10 | 13.06 |       |
|  | 1.650 | 0.97 | 1.97 | Q6JUH3  | Phospholipase B-like 1/Phospholipase B-like 1 chain A/Phospholipase | Pls1     | 1968 | 12 | 12 | 12   | 7.4   | 7.4   | 7.4    | 7.4    | 273.93  | 0.0000   | 89.172 | 26211000  | 476      | 16.85 | 17.66 | 17.27 | 17.27 | 16.85 | 16.85 | 16.85 | 16.85 |       |
|  | 2.077 | 0.97 | 1.97 | Q6P4818 | Galactoseceroidosis                                                 | Galc     | 1259 | 7  | 7  | 7    | 15.2  | 15.2  | 15.2   | 15.2   | 77.256  | 0.0000   | 57.317 | 18472000  | 155      | 16.85 | 16.77 | 16.57 | 17.10 | 16.27 | 15.22 | 15.87 | 16.04 |       |
|  | 1.247 | 0.97 | 1.97 | Q6R3F5  | Malonyl-CoA-acyl carrier protein transacylase, mitochondrial        | Malc     | 3844 | 6  | 6  | 6    | 27    | 27    | 27     | 27     | 41.928  | 0.0000   | 47.02  | 5236200   | 85       | 14.74 | 14.71 | 15.71 | 15.30 | 14.11 | 14.93 | 14.24 | 13.30 |       |
|  | 2.874 | 0.97 | 1.97 | Q6K1R7  | Rat GTPase-activating protein subunit beta                          | Ratgabp  | 3174 | 9  | 9  | 9    | 22.3  | 22.3  | 22.3   | 22.3   | 10.14   | 0.0000   | 24.901 | 3093900   | 39       | 14.80 | 14.71 | 15.71 | 15.30 | 14.11 | 14.93 | 14.24 | 13.30 |       |
|  | 1.085 | 0.97 | 1.97 | Q6CHT3  | Serine/threonine-protein kinase Nek3                                | Nek3     | 3633 | 19 | 19 | 19   | 22.3  | 22.3  | 22.3   | 22.3   | 10.14   | 0.0000   | 24.901 | 3093900   | 287      | 16.87 | 16.44 | 16.98 | 16.65 | 15.85 | 15.88 | 16.05 | 15.48 |       |
|  | 1.375 | 0.97 | 1.97 | Q6CHT3  | Integrator complex subunit 5                                        | Int5     | 3532 | 2  | 2  | 2    | 2.5   | 2.5   | 2.5    | 2.5    | 108.35  | 0.0000   | 9.247  | 1660400   | 17       | 13.57 | 13.42 | 14.12 | 14.28 | 13.05 | 13.02 | 13.71 | 11.72 |       |
|  | 0.766 | 0.97 | 1.97 | Q6B1V4  | Phosphatidylcholine 5-phosphate 4-kinase type-2 gamma               | Ptd4kc2  | 4149 | 27 | 8  | 8    | 23    | 23    | 23     | 23     | 45.458  | 0.0000   | 146.82 | 8834000   | 308      | 15.57 | 15.14 | 15.81 | 15.51 | 15.23 | 15.13 | 15.32 | 12.79 |       |
|  | 1.840 | 0.97 | 1.97 | Q6P53   | Tripartite motif-containing protein 65                              | Tm65     | 2950 | 8  | 8  | 8    | 23    | 23    | 23     | 23     | 58.458  | 0.0000   | 10.216 | 8834000   | 308      | 15.57 | 15.14 | 15.81 | 15.51 | 15.23 | 15.13 | 15.32 | 12.79 |       |
|  | 2.701 | 0.97 | 1.97 | Q6S224  | Hamartin                                                            | Tsc1     | 5242 | 10 | 10 | 10   | 13.3  | 13.3  | 12.74  | 13.3   | 128.74  | 0.0000   | 17.613 | 4917500   | 51       | 15.20 | 14.74 | 15.50 | 15.29 | 13.80 | 14.36 | 14.82 | 13.88 |       |
|  | 1.333 | 0.96 | 1.96 | Q6BPM0  | Protein phosphatase type 5                                          | Pfam5    | 456  | 12 | 12 | 12   | 47    | 47    | 47     | 47     | 28.532  | 0.0000   | 167.96 | 44891000  | 259      | 17.69 | 17.35 | 17.42 | 17.85 | 16.57 | 16.28 | 16.98 | 16.61 |       |
|  | 1.373 | 0.96 | 1.96 | Q6BPM0  | Cyclo-oxygenase 1                                                   | Cox1     | 5733 | 36 | 36 | 36   | 57    |       |        |        |         |          |        |           |          |       |       |       |       |       |       |       |       |       |

|       |      |             |                                                                                   |         |      |    |    |      |      |      |        |        |        |           |          |       |       |       |       |       |       |       |       |       |
|-------|------|-------------|-----------------------------------------------------------------------------------|---------|------|----|----|------|------|------|--------|--------|--------|-----------|----------|-------|-------|-------|-------|-------|-------|-------|-------|-------|
| 1.865 | 0.93 | 1.90 Q9ESL4 | Mitogen-activated protein kinase kinase kinase MLT                                | Zak     | 5340 | 8  | 8  | 8    | 9.6  | 9.6  | 9.6    | 9.1719 | 0.0000 | 16.861    | 5511400  | 50    | 15.00 | 14.27 | 14.88 | 14.90 | 13.45 | 14.41 | 13.91 | 13.66 |
| 1.092 | 0.93 | 1.90 A2AT37 | WD repeat-containing protein m10                                                  | Usp2    | 39   | 6  | 6  | 6    | 7.6  | 7.6  | 7.6    | 147.55 | 0.0000 | 14.763    | 1417900  | 18    | 13.17 | 12.89 | 14.14 | 13.22 | 11.66 | 12.42 | 12.28 | 13.35 |
| 0.506 | 0.92 | 1.90 Q8VE19 | WD repeat-containing protein m10                                                  | Usp2    | 3983 | 7  | 7  | 7    | 13   | 13   | 13     | 98.334 | 0.0000 | 29.589    | 7877700  | 25    | 16.08 | 16.05 | 16.45 | 15.71 | 15.91 | 12.68 | 16.04 | 15.95 |
| 3.070 | 0.92 | 1.90 Q81081 | Hsp90 co-chaperone Cdc37/Hsp90 co-chaperone Cdc37, N-terminally                   | Cdc37   | 2246 | 28 | 28 | 28   | 53.8 | 53.8 | 44.593 | 0.0000 | 32.331 | 139030000 | 751      | 18.51 | 18.20 | 18.71 | 18.68 | 17.50 | 17.61 | 17.84 | 17.35 |       |
| 1.904 | 0.92 | 1.89 Q11227 | NGF-A-binding protein 2                                                           | Nab2    | 2255 | 6  | 6  | 5    | 13.3 | 13.3 | 11.6   | 56.576 | 0.0000 | 37.454    | 3720200  | 30    | 14.67 | 14.59 | 14.59 | 15.13 | 13.56 | 13.41 | 13.88 | 14.44 |
| 1.970 | 0.92 | 1.89 Q84005 | PAB-dependent poly(A)-specific ribonuclease subunit PAN3                          | Pan3    | 2416 | 4  | 4  | 4    | 7    | 7    | 7      | 89.744 | 0.0000 | 12.22     | 3277200  | 45    | 14.45 | 14.40 | 14.76 | 14.38 | 13.28 | 14.05 | 13.88 | 13.90 |
| 2.435 | 0.92 | 1.88 Q5SSH7 | Zinc finger ZZ-type and EF-hand domain-containing protein 1                       | Znf1    | 2136 | 21 | 21 | 21   | 10.8 | 10.8 | 10.8   | 328.31 | 0.0000 | 65.365    | 19424000 | 163   | 16.44 | 15.74 | 16.47 | 16.03 | 15.31 | 15.02 | 15.49 | 15.19 |
| 1.841 | 0.92 | 1.89 Q81R10 | Tyrosine-protein phosphatase non-receptor type 2                                  | Phn2    | 1749 | 7  | 7  | 7    | 20.2 | 20.2 | 17.36  | 20.2   | 0.0000 | 44.3      | 4056100  | 17    | 14.61 | 13.84 | 14.12 | 13.71 | 14.31 | 12.17 | 14.02 | 13.97 |
| 1.130 | 0.92 | 1.89 Q8BR65 | Sn3 histone deacetylase corepressor complex component SD53                        | Sdn3    | 2178 | 4  | 4  | 4    | 12.2 | 12.2 | 12.2   | 38.107 | 0.0000 | 20.67     | 1448200  | 40    | 14.07 | 13.20 | 13.58 | 13.56 | 11.85 | 12.85 | 12.71 | 13.52 |
| 2.725 | 0.92 | 1.89 Q8P9J9 | Anoctamin-6                                                                       | Ano6    | 2586 | 17 | 17 | 21.3 | 21.3 | 21.3 | 106.25 | 0.0000 | 17.22  | 4759800   | 356      | 16.75 | 16.32 | 16.90 | 16.80 | 15.64 | 15.57 | 15.79 | 16.10 |       |
| 1.674 | 0.91 | 1.89 Q8ZG26 | At-GAP with coiled-coil, ANK repeat and PH domain-containing protein              | AtGAP   | 2720 | 24 | 24 | 24   | 42.6 | 42.6 | 41.6   | 87.221 | 0.0000 | 146.38    | 4333000  | 405   | 16.57 | 16.33 | 16.58 | 16.58 | 15.72 | 15.65 | 16.02 | 15.77 |
| 2.080 | 0.92 | 1.89 Q81151 | Serine/threonine-protein phosphatase 2A 56 kDa regulatory subunit epiPpp2r5e      | Vps18   | 2586 | 10 | 10 | 8    | 27   | 27   | 20.8   | 54.713 | 0.0000 | 23.352    | 1956000  | 62    | 16.89 | 16.97 | 16.99 | 16.91 | 16.20 | 16.30 | 16.27 | 15.32 |
| 3.556 | 0.92 | 1.89 Q8R3Q7 | Vacuolar protein sorting-associated protein 18 homolog                            | Vps18   | 3827 | 33 | 33 | 33   | 41   | 41   | 41     | 110.22 | 0.0000 | 122.29    | 4095200  | 400   | 16.67 | 16.37 | 16.25 | 16.48 | 15.57 | 15.70 | 15.67 | 15.56 |
| 0.940 | 0.92 | 1.88 Q8BWR2 | PI3K domain-containing protein 1                                                  | Plnc1   | 246  | 3  | 3  | 3    | 24.6 | 24.6 | 24.6   | 24.162 | 0.0000 | 9.884     | 786040   | 10    | 14.14 | 13.02 | 13.58 | 13.73 | 12.88 | 13.87 | 11.66 | 12.10 |
| 1.120 | 0.91 | 1.88 P55302 | Alpha-2-macroglobulin receptor-associated protein                                 | Alp2    | 1272 | 23 | 23 | 23   | 61.4 | 61.4 | 61.4   | 42.215 | 0.0000 | 75.455    | 3729000  | 279   | 16.69 | 17.14 | 16.13 | 16.85 | 15.79 | 16.02 | 15.77 | 15.51 |
| 2.249 | 0.91 | 1.88 Q9D2Y5 | Sorting nexin-20                                                                  | Snx20   | 4956 | 2  | 2  | 2    | 8.3  | 8.3  | 36.028 | 0.0002 | 5.9563 | 658290    | 7        | 13.36 | 13.36 | 13.77 | 13.78 | 12.44 | 12.83 | 12.27 | 13.07 |       |
| 1.827 | 0.91 | 1.88 Q8Z230 | Sialoadhesin                                                                      | Slglec1 | 2370 | 38 | 38 | 38   | 28.6 | 28.6 | 28.6   | 182.98 | 0.0000 | 228.34    | 7506800  | 458   | 17.62 | 16.83 | 16.91 | 16.66 | 16.41 | 16.19 | 16.15 | 15.62 |
| 2.952 | 0.91 | 1.89 P5446P | Pyruvate dehydrogenase E1 component subunit alpha, somatic form, mP181            | Pd181   | 1021 | 32 | 32 | 32   | 66.7 | 66.7 | 66.7   | 43.231 | 0.0000 | 129.66    | 10509000 | 638   | 17.53 | 17.07 | 17.48 | 17.52 | 16.65 | 16.28 | 16.76 | 16.36 |
| 2.188 | 0.91 | 1.88 Q8Z2J9 | Fatty acyl-CoA reductase 1                                                        | Far1    | 4261 | 7  | 7  | 7    | 18.3 | 18.3 | 18.3   | 56.434 | 0.0000 | 16.113    | 9329100  | 58    | 15.84 | 15.62 | 14.86 | 15.30 | 14.57 | 14.30 | 14.59 | 14.52 |
| 2.886 | 0.91 | 1.88 P63328 | P48Serine/threonine-protein phosphatase 2B catalytic subunit alpha isoform Ppp3ca | Ppp3ca  | 1506 | 25 | 25 | 16   | 48.9 | 48.9 | 29.9   | 58.643 | 0.0000 | 184.84    | 62502000 | 478   | 17.12 | 16.70 | 17.22 | 17.16 | 16.25 | 15.90 | 16.39 | 16.02 |
| 1.818 | 0.91 | 1.88 P59114 | Phosphorylated CTD-interacting factor 1                                           | Pcf11   | 1332 | 3  | 3  | 3    | 6.9  | 6.9  | 6.9    | 80.504 | 0.0000 | 9.1816    | 1765500  | 35    | 13.73 | 13.66 | 14.54 | 14.01 | 13.07 | 12.82 | 12.81 | 13.58 |
| 3.890 | 0.91 | 1.88 P87310 | DNA replication licensing factor MCM2                                             | Mcm2    | 1620 | 36 | 36 | 36   | 47.1 | 47.1 | 47.1   | 102.08 | 0.0000 | 240       | 49955000 | 567   | 16.66 | 16.31 | 16.69 | 16.46 | 15.77 | 15.52 | 15.58 | 15.81 |
| 1.579 | 0.91 | 1.88 Q924C1 | Exportin-5                                                                        | Xpo5    | 4291 | 13 | 13 | 13   | 17.1 | 17.1 | 17.1   | 136.97 | 0.0000 | 57.282    | 6515000  | 99    | 14.87 | 14.38 | 14.76 | 14.55 | 13.64 | 12.97 | 14.4  | 13.98 |
| 2.239 | 0.91 | 1.88 Q8C383 | Transcription elongation factor SPT6                                              | Spt6    | 2383 | 27 | 27 | 27   | 22.2 | 22.2 | 22.2   | 198.08 | 0.0000 | 42.089    | 25501000 | 110   | 21.97 | 21.33 | 21.97 | 21.79 | 20.91 | 21.03 | 21.07 | 20.39 |
| 1.221 | 0.91 | 1.88 Q8Q205 | Eukaryotic translation initiation factor 2-alpha kinase 4                         | Eif4k4  | 5582 | 9  | 9  | 9    | 2.3  | 2.3  | 2.3    | 186.48 | 0.0000 | 8.3241    | 1072300  | 17    | 13.53 | 12.93 | 14.59 | 13.48 | 12.22 | 12.69 | 12.96 | 13.04 |
| 2.242 | 0.91 | 1.88 P35991 | Q607Ysine-protein kinase BTK                                                      | Btk     | 1399 | 27 | 27 | 26   | 46.7 | 46.7 | 45.5   | 76.437 | 0.0000 | 32.331    | 8121300  | 546   | 17.91 | 17.24 | 17.42 | 17.63 | 16.94 | 16.25 | 16.87 | 16.51 |
| 2.498 | 0.91 | 1.88 Q8Z1K6 | E3 ubiquitin-protein ligase ARH2                                                  | Arh2    | 5811 | 10 | 10 | 10   | 30.7 | 30.7 | 30.7   | 57.696 | 0.0000 | 65.365    | 1250100  | 151   | 15.45 | 14.83 | 15.44 | 15.35 | 14.32 | 14.13 | 14.70 | 14.28 |
| 1.145 | 0.91 | 1.88 Q8RLS4 | Actin-related protein 7                                                           | Arp7    | 2815 | 7  | 7  | 7    | 17.4 | 17.4 | 17.4   | 84.4   | 0.0000 | 30.160    | 3016000  | 24    | 12.68 | 14.20 | 14.68 | 14.68 | 13.38 | 13.47 | 13.57 | 13.57 |
| 2.255 | 0.91 | 1.88 Q9RLD9 | Translation initiation factor eIF2B subunit beta                                  | Eif2b2  | 4822 | 12 | 12 | 12   | 42.7 | 42.7 | 42.7   | 38.897 | 0.0000 | 66.297    | 1598000  | 172   | 15.63 | 15.25 | 16.03 | 15.94 | 14.80 | 14.61 | 15.16 | 14.66 |
| 2.544 | 0.91 | 1.88 Q91Y92 | Neurolysin, mitochondrial                                                         | Nln     | 2404 | 24 | 24 | 24   | 42.2 | 42.2 | 42.2   | 80.428 | 0.0000 | 134       | 4489600  | 308   | 17.05 | 16.60 | 17.17 | 16.95 | 15.95 | 16.05 | 16.41 | 15.73 |
| 1.397 | 0.92 | 1.88 Q8CQ54 | ADAM14 dehydrogenase [ubiquinone] 1 subunit C2                                    | Ad14    | 4502 | 9  | 9  | 9    | 30   | 30   | 30     | 164.84 | 0.0000 | 36.369    | 2410700  | 147   | 16.26 | 16.15 | 16.26 | 16.26 | 15.79 | 15.79 | 16.79 | 16.34 |
| 2.482 | 0.91 | 1.87 Q4PJX1 | Protein o6-4 homolog                                                              | O64     | 2074 | 11 | 11 | 31.8 | 31.8 | 31.8 | 418.49 | 0.0000 | 129.04 | 1837100   | 149      | 16.69 | 16.19 | 16.52 | 16.60 | 15.81 | 15.34 | 15.92 | 15.30 |       |
| 1.590 | 0.90 | 1.87 Q03347 | Run-related transcription factor 1                                                | Runx1   | 1726 | 7  | 7  | 7    | 23.5 | 23.5 | 23.5   | 48.609 | 0.0000 | 33.2      | 7395600  | 56    | 15.69 | 15.09 | 16.14 | 15.71 | 14.99 | 15.40 | 14.41 | 14.62 |
| 2.588 | 0.90 | 1.87 Q91VJ6 | DBP1- and CUL4-associated factor 11                                               | Cdf11   | 4079 | 7  | 7  | 7    | 18   | 18   | 18     | 61.991 | 0.0000 | 64.582    | 5212800  | 100   | 14.77 | 14.28 | 15.01 | 14.75 | 13.54 | 13.74 | 14.02 | 13.89 |
| 1.651 | 0.90 | 1.87 Q91VJ3 | HLA class II domain-binding glutamic acid-rich-like protein 3                     | HLA3    | 4081 | 7  | 7  | 7    | 79.6 | 79.6 | 79.6   | 408.1  | 0.0000 | 90.79     | 4579400  | 122   | 15.98 | 15.31 | 15.98 | 15.98 | 14.72 | 14.72 | 15.07 | 14.66 |
| 1.821 | 0.90 | 1.87 Q91ZV0 | Melanoma inhibitory activity protein 2                                            | Mia2    | 1404 | 14 | 14 | 14   | 12   | 12   | 12     | 156.46 | 0.0000 | 69.504    | 1624000  | 90    | 16.37 | 15.96 | 16.29 | 16.44 | 15.48 | 14.95 | 16.01 | 15.01 |
| 3.499 | 0.90 | 1.87 P24527 | Leukotriene A-4 hydrolase                                                         | Lt4h    | 898  | 42 | 42 | 42   | 74.1 | 74.1 | 74.1   | 69.05  | 0.0000 | 32.331    | 20493000 | 926   | 18.45 | 18.34 | 18.59 | 18.65 | 17.53 | 17.46 | 17.90 | 17.53 |
| 1.871 | 0.90 | 1.87 Q8U4D9 | RHO complex subunit 1                                                             | Rho1    | 2161 | 14 | 14 | 14   | 26.1 | 26.1 | 26.1   | 52.323 | 0.0000 | 66.4890   | 6648900  | 68    | 13.94 | 14.26 | 14.94 | 14.94 | 13.49 | 13.49 | 14.03 | 13.63 |
| 1.290 | 0.90 | 1.86 Q8PE01 | U5 small nuclear ribonucleoprotein 40 kDa protein                                 | Smnp40  | 2622 | 13 | 13 | 13   | 57.3 | 57.3 | 57.3   | 39.275 | 0.0000 | 318.87    | 2689900  | 238   | 16.21 | 15.92 | 16.53 | 16.44 | 15.50 | 15.73 | 15.91 | 14.38 |
| 1.729 | 0.90 | 1.86 Q3TR1  | Trafficking protein particle complex subunit 13                                   | Trapp13 | 1848 | 6  | 6  | 6    | 22.3 | 22.3 | 22.3   | 46.476 | 0.0000 | 57.481    | 1030100  | 82    | 15.61 | 15.95 | 16.21 | 15.93 | 14.31 | 15.06 | 15.32 | 15.41 |
| 2.996 | 0.90 | 1.86 P47934 | Carnitine O-acetyltransferase                                                     | Crot    | 1131 | 21 | 21 | 20   | 37.5 | 37.5 | 35.8   | 70.839 | 0.0000 | 10.8      | 3515800  | 308   | 16.45 | 16.21 | 16.45 | 16.26 | 15.45 | 15.47 | 15.77 | 15.10 |
| 1.471 | 0.90 | 1.86 Q866L8 | EAHF domain-containing protein kinase 4                                           | EAHF    | 2065 | 18 | 18 | 18   | 28   | 28   | 28     | 59.231 | 0.0000 | 279.28    | 2793300  | 248   | 16.52 | 15.91 | 16.52 | 16.52 | 15.45 | 15.45 | 15.45 | 15.45 |
| 1.506 | 0.90 | 1.86 Q70469 | Docking protein 2                                                                 | Dok2    | 2022 | 11 | 11 | 11   | 32   | 32   | 32     | 45.522 | 0.0000 | 14.118    | 1545900  | 83    | 16.78 | 16.21 | 15.50 | 16.24 | 15.43 | 15.47 | 15.51 | 14.74 |
| 2.853 | 0.89 | 1.86 Q8CFD3 | Intron-binding protein-activating factor 8                                        | Agr     | 3491 | 15 | 15 | 15   | 16.1 | 16.1 | 16.1   | 170.29 | 0.0000 | 192.83    | 1218700  | 147   | 15.31 | 14.83 | 15.51 | 15.22 | 14.31 | 14.04 | 14.45 | 14.49 |
| 1.220 | 0.89 | 1.86 Q8D064 | E3 ubiquitin-protein ligase ATRX                                                  | Atrx    | 529  | 33 | 33 | 33   | 54   | 54   | 54     | 51.518 | 0.0000 | 33.707    | 2629200  | 134   | 15.33 | 15.33 | 15.33 | 15.33 | 14.53 | 14.53 | 14.53 | 14.53 |
| 2.424 | 0.89 | 1.86 Q99P00 | Pre-mRNA-processing-spliquin factor 8                                             | Prp8    | 4518 | 83 | 83 | 82   | 41.6 | 41.6 | 40.1   | 273.61 | 0.0000 | 323.31    | 39596000 | 1135  | 21.60 | 20.91 | 21.50 | 21.46 | 20.33 | 20.26 | 20.73 | 20.29 |
| 0.961 | 0.89 | 1.86 Q8BH15 | UCR-NAD transcription complex subunit 10                                          | Cnct10  | 3707 | 3  | 3  | 3    | 6.6  | 6.6  | 6.6    | 88.224 | 0.0000 | 13.27     | 1221800  | 44    | 13.44 | 12.44 | 13.73 | 13.22 | 12.14 | 11.59 | 12.12 | 13.41 |
| 2.382 | 0.89 | 1.86 Q8R059 | UDP-glucose 4-epimerase                                                           | Gale    | 3048 | 13 | 13 | 13   | 43.2 | 43.2 | 43.2   | 81.217 | 0.0000 | 37.245    | 1486000  | 164   | 15.92 | 15.64 | 15.86 | 15.57 | 14.88 | 15.27 | 14.83 | 14.41 |
| 1.541 | 0.89 | 1.86 Q81037 | Tuber                                                                             | Tub1    | 2243 | 13 | 13 | 13   | 8.2  | 8.2  | 8.2    | 20.027 | 0.0000 | 53.43     | 5011500  | 6     | 14.69 | 14.69 | 14.69 | 14.69 | 14.69 | 14.69 | 14.69 | 14.69 |
| 1.844 | 0.89 | 1.85 Q81235 | Q95beta-2-antitroponin                                                            | Snb2    | 2283 | 10 | 10 | 21.5 | 21.5 | 21.5 | 56.381 | 0.0000 | 28.839 | 1458300   | 132      | 16.09 | 16.05 | 16.29 | 16.45 | 15.99 | 1     |       |       |       |

|       |      |             |                                                                         |          |      |    |    |    |      |      |        |        |        |           |           |       |       |       |       |       |       |       |       |       |
|-------|------|-------------|-------------------------------------------------------------------------|----------|------|----|----|----|------|------|--------|--------|--------|-----------|-----------|-------|-------|-------|-------|-------|-------|-------|-------|-------|
| 2.024 | 0.85 | 1.80 Q91VJ1 | Interferon-inducible protein AIM2                                       | Aim2     | 4064 | 9  | 9  | 9  | 41   | 41   | 41     | 40.155 | 0.0000 | 62.365    | 5788100   | 60    | 14.85 | 14.75 | 15.15 | 15.00 | 13.54 | 14.48 | 14.10 | 14.33 |
| 2.196 | 0.85 | 1.80 Q8R3S6 | Exocyst complex component 1                                             | Exoc1    | 3857 | 26 | 26 | 26 | 41.9 | 41.9 | 41.9   | 101.89 | 0.0000 | 246.09    | 2758000   | 249   | 16.94 | 16.17 | 16.46 | 16.15 | 15.42 | 15.41 | 15.76 | 15.72 |
| 0.900 | 0.85 | 1.80 Q3JH93 | Plexin-D1                                                               | Plexnd1  | 1967 | 14 | 14 | 14 | 9.2  | 9.2  | 9.2    | 211.61 | 0.0000 | 43.883    | 16333000  | 86    | 15.58 | 15.73 | 17.70 | 17.64 | 15.86 | 15.98 | 16.17 | 16.24 |
| 0.325 | 0.85 | 1.80 Q8R1J9 | PCP-Toran-24                                                            | Tora2    | 3790 | 3  | 3  | 3  | 14   | 14   | 14     | 35.897 | 0.0000 | 42.155    | 1562600   | 13    | 13.37 | 13.27 | 15.98 | 15.66 | 14.99 | 13.35 | 12.05 | 13.71 |
| 1.567 | 0.85 | 1.80 Q8K2C9 | Very-long-chain (3R)-3-hydroxyacyl-CoA dehydratase 3                    | Hacd3    | 3656 | 5  | 5  | 5  | 17.7 | 17.7 | 17.7   | 43.131 | 0.0000 | 46.94     | 26758000  | 83    | 17.52 | 16.85 | 17.86 | 17.70 | 16.21 | 16.69 | 17.08 | 16.65 |
| 0.277 | 0.85 | 1.80 P06339 | H-2 class I histocompatibility antigen, D-37 alpha chain                | H2-T23   | 657  | 7  | 6  | 6  | 26.9 | 24.6 | 24.6   | 40.875 | 0.0000 | 11.34     | 4735000   | 37    | 16.48 | 15.64 | 17.10 | 15.99 | 17.69 | 17.37 | 12.73 | 14.03 |
| 1.471 | 0.85 | 1.80 Q8PRF0 | HEAT repeat-containing protein 5A                                       | Heat5a   | 2123 | 16 | 16 | 16 | 12.4 | 12.4 | 12.4   | 219.89 | 0.0000 | 182.45    | 9975800   | 139   | 15.53 | 14.88 | 15.02 | 14.83 | 14.44 | 13.80 | 14.66 | 13.77 |
| 1.684 | 0.85 | 1.80 Q3J604 | Niemann-Pick C1 protein                                                 | Npc1     | 3685 | 11 | 11 | 11 | 8.2  | 8.2  | 8.2    | 142.88 | 0.0000 | 39.41     | 57186000  | 11    | 16.05 | 17.52 | 17.69 | 18.20 | 17.32 | 16.83 | 17.29 | 16.30 |
| 1.496 | 0.85 | 1.80 Q8JJK2 | Lanc-like protein 2                                                     | Lanc2    | 5430 | 8  | 8  | 8  | 26.7 | 26.7 | 26.7   | 50.777 | 0.0000 | 89.079    | 19173000  | 144   | 16.16 | 15.95 | 16.00 | 16.41 | 15.53 | 15.43 | 16.01 | 14.67 |
| 1.014 | 0.85 | 1.80 Q8Z2R6 | Protein unc-119 homolog A                                               | Unc119   | 2863 | 5  | 4  | 4  | 29.6 | 25.8 | 25.8   | 27.01  | 0.0000 | 22.925    | 3379000   | 29    | 14.49 | 14.44 | 15.31 | 14.74 | 14.04 | 14.06 | 14.65 | 12.84 |
| 1.50  | 0.84 | 1.79 Q8V1X4 | Solute carrier family 12 member 7                                       | Slc12a7  | 5702 | 10 | 10 | 10 | 12.4 | 12.4 | 12.4   | 119.44 | 0.0000 | 91.93     | 7272000   | 108   | 15.02 | 14.49 | 14.73 | 15.02 | 14.87 | 14.24 | 14.73 | 15.96 |
| 2.227 | 0.85 | 1.80 Q5SSZ5 | Tensin-3                                                                | Tns3     | 5141 | 40 | 40 | 37 | 48   | 46.2 | 45.59  | 0.0000 | 32.31  | 109350000 | 758       | 17.81 | 17.18 | 18.00 | 17.76 | 17.73 | 16.83 | 17.12 | 16.68 |       |
| 3.478 | 0.84 | 1.80 Q8BMP6 | Golgi resident protein PCGP60                                           | Acd3     | 3145 | 11 | 11 | 11 | 30.7 | 30.7 | 30.7   | 60.18  | 0.0000 | 186.49    | 29304000  | 213   | 16.94 | 16.65 | 16.68 | 16.94 | 16.10 | 15.81 | 16.22 | 15.89 |
| 3.289 | 0.84 | 1.79 Q8CYT2 | Very-long-chain enoyl-CoA reductase                                     | Acad3    | 4780 | 20 | 20 | 20 | 38.3 | 38.3 | 38.3   | 36.05  | 0.0000 | 89.824    | 119020000 | 51    | 17.78 | 16.33 | 16.74 | 16.65 | 17.85 | 17.73 | 17.93 | 17.61 |
| 1.754 | 0.84 | 1.79 Q8J029 | Leucyl-cystinyl aminopeptidase                                          | Lncpe    | 3350 | 23 | 23 | 22 | 28.2 | 25.5 | 117.3  | 0.0000 | 157.95 | 41005000  | 300       | 16.84 | 16.65 | 16.80 | 16.84 | 16.45 | 16.73 | 16.22 | 15.63 |       |
| 1.340 | 0.84 | 1.79 Q8K2L8 | Trafficking protein particle complex subunit 12                         | Trappc12 | 3665 | 8  | 8  | 8  | 16.2 | 16.2 | 16.2   | 87.693 | 0.0000 | 49.238    | 11535000  | 79    | 16.38 | 16.17 | 16.95 | 16.92 | 15.43 | 16.25 | 16.20 | 15.17 |
| 1.150 | 0.84 | 1.79 Q8DBC3 | Cap-specific mRNA (nucleoside-2-O)-methyltransferase 1                  | Cmt1     | 5142 | 15 | 15 | 15 | 21.1 | 21.1 | 21.1   | 95.675 | 0.0000 | 42.937    | 14891000  | 152   | 15.76 | 14.91 | 15.56 | 15.25 | 14.79 | 14.86 | 14.96 | 13.53 |
| 2.709 | 0.84 | 1.79 Q8V1X4 | Tyrosine-tRNA ligase, mitochondrial                                     | Yars2    | 5756 | 10 | 9  | 9  | 26.9 | 26.9 | 52.597 | 0.0000 | 27.728 | 5561000   | 85        | 14.69 | 14.54 | 15.09 | 14.97 | 13.17 | 14.15 | 14.12 | 13.94 |       |
| 0.433 | 0.84 | 1.79 Q8R1Z7 | 6-pyruvoyl tetrahydrobiopterin synthase                                 | Pts      | 5666 | 6  | 6  | 6  | 41   | 41   | 41     | 16.188 | 0.0002 | 5.8078    | 9704200   | 29    | 15.24 | 16.12 | 14.83 | 16.04 | 15.87 | 12.91 | 13.81 | 16.26 |
| 0.440 | 0.84 | 1.79 Q5Q735 | Ubiquitin conjugation factor E4 A                                       | Ube4a    | 244  | 8  | 8  | 8  | 14.2 | 14.2 | 14.2   | 118.2  | 0.0000 | 81.573    | 3026800   | 36    | 14.31 | 12.98 | 16.46 | 14.94 | 12.50 | 14.11 | 14.20 | 14.52 |
| 1.114 | 0.84 | 1.79 Q8CX13 | Uncharacterized protein C1orf50 homolog                                 | C1orf50  | 4762 | 8  | 8  | 8  | 37.4 | 37.4 | 37.4   | 22.168 | 0.0000 | 10.471    | 1693100   | 16    | 13.36 | 13.45 | 14.26 | 13.26 | 12.88 | 12.49 | 12.16 | 13.55 |
| 0.345 | 0.84 | 1.79 P41233 | ATP-binding cassette sub-family A member 1                              | Abca1    | 1067 | 7  | 7  | 7  | 5.4  | 5.4  | 253.91 | 0.0000 | 9.474  | 1529300   | 22        | 17.82 | 16.94 | 16.74 | 16.55 | 16.83 | 13.22 | 17.20 | 17.63 |       |
| 1.302 | 0.84 | 1.79 Q8DC50 | Peroxisomal carnitine O-octanoyltransferase                             | Crot     | 5193 | 12 | 12 | 11 | 28.1 | 28.1 | 24.7   | 70.264 | 0.0000 | 53.199    | 12076000  | 111   | 14.70 | 15.28 | 15.84 | 15.41 | 14.59 | 14.04 | 15.12 | 14.13 |
| 1.254 | 0.84 | 1.79 Q8V1M9 | Inorganic pyrophosphatase 2, mitochondrial                              | Ppa2     | 4069 | 6  | 6  | 6  | 27   | 27   | 27     | 38.114 | 0.0000 | 27.222    | 6767000   | 89    | 15.68 | 15.55 | 15.13 | 15.21 | 14.58 | 13.87 | 15.43 | 14.32 |
| 2.160 | 0.84 | 1.79 Q8J029 | F-BAR domain only protein 2                                             | Fcho2    | 2019 | 24 | 24 | 24 | 43.5 | 34.5 | 88.733 | 0.0000 | 323.31 | 34513000  | 318       | 16.78 | 16.36 | 17.18 | 16.88 | 15.98 | 16.22 | 16.02 | 15.63 |       |
| 0.876 | 0.84 | 1.79 Q8P3E7 | Histone deacetylase 10                                                  | Hdac10   | 2562 | 3  | 3  | 3  | 6.3  | 6.3  | 72.108 | 0.0002 | 5.9251 | 2565900   | 33        | 14.68 | 14.51 | 14.85 | 14.97 | 12.54 | 14.56 | 14.51 | 14.05 |       |
| 0.972 | 0.84 | 1.79 P06240 | Proto-oncogene tyrosine-protein kinase LCK                              | Lck      | 656  | 2  | 1  | 1  | 2.8  | 2.8  | 57.942 | 0.0008 | 4.0969 | 1462500   | 27        | 13.42 | 13.08 | 14.92 | 13.23 | 12.58 | 13.11 | 12.90 | 12.69 |       |
| 1.397 | 0.84 | 1.79 Q8BWK2 | N-alpha-acylserine protease 25, NaBr auxiliary subunit                  | Nas25    | 3773 | 21 | 21 | 21 | 30.7 | 30.7 | 111.71 | 0.0000 | 69.491 | 18022000  | 215       | 14.91 | 15.81 | 15.81 | 15.81 | 15.81 | 15.81 | 15.81 | 15.81 |       |
| 1.253 | 0.84 | 1.79 P01027 | Complement C3, Complement C3 beta chain, C3-beta; Complement C3C3       | C3       | 617  | 23 | 22 | 22 | 20.4 | 20.4 | 186.48 | 0.0000 | 76.043 | 17835000  | 93        | 17.13 | 16.52 | 16.43 | 16.04 | 16.49 | 15.47 | 15.28 | 15.25 |       |
| 1.858 | 0.84 | 1.79 Q8QLC2 | Cleavage stimulation factor subunit 1                                   | Catf1    | 2119 | 10 | 10 | 10 | 34.6 | 34.6 | 48.381 | 0.0000 | 102.27 | 18786000  | 174       | 15.75 | 15.21 | 16.21 | 16.08 | 15.11 | 14.87 | 15.16 | 14.76 |       |
| 1.735 | 0.84 | 1.79 Q5S075 | Dead syndrome-related region protein 3 homolog                          | Dsr3     | 3303 | 3  | 3  | 3  | 30.3 | 30.3 | 32.97  | 0.0000 | 104.97 | 23637000  | 163       | 16.38 | 16.37 | 16.37 | 16.37 | 16.37 | 16.37 | 16.37 | 16.37 |       |
| 2.337 | 0.84 | 1.79 Q8Q737 | Casase kinase II subunit alpha                                          | Cank1a   | 4495 | 18 | 18 | 18 | 53.7 | 53.7 | 45.153 | 0.0000 | 323.31 | 81820000  | 501       | 17.73 | 17.25 | 17.04 | 17.26 | 16.53 | 16.69 | 15.86 | 16.14 |       |
| 1.999 | 0.84 | 1.78 P0C8B7 | Immunoglobulin superfamily member 6                                     | Igsf6    | 706  | 7  | 7  | 7  | 24.1 | 24.1 | 26.354 | 0.0000 | 80.882 | 21114000  | 154       | 17.27 | 16.40 | 17.08 | 17.09 | 15.95 | 15.93 | 16.16 | 16.45 |       |
| 2.228 | 0.83 | 1.78 Q8Q747 | Short-chain specific acyl-CoA dehydrogenase, mitochondrial              | Acads    | 1756 | 18 | 18 | 18 | 58.7 | 58.7 | 44.889 | 0.0000 | 323.31 | 31326000  | 608       | 18.73 | 18.34 | 18.88 | 18.91 | 18.08 | 17.56 | 18.19 | 17.69 |       |
| 2.257 | 0.83 | 1.78 Q8Q140 | Protein transport protein Sec23A                                        | Sec23a   | 1708 | 26 | 26 | 26 | 6.6  | 6.6  | 161.61 | 0.0000 | 323.31 | 48539000  | 305       | 16.90 | 16.38 | 17.05 | 16.90 | 16.38 | 17.05 | 16.90 | 16.38 |       |
| 3.502 | 0.83 | 1.78 P11469 | Heat shock protein HSP 90-beta                                          | Hsp90ab1 | 745  | 83 | 83 | 80 | 78.2 | 78.2 | 65.2   | 83.28  | 0.0000 | 61.353    | 171450000 | 3337  | 20.87 | 20.51 | 20.67 | 20.81 | 19.99 | 19.85 | 20.01 | 19.66 |
| 3.718 | 0.83 | 1.78 Q8JUL2 | Glycidyl transfer protein                                               | Gltp     | 5473 | 10 | 10 | 10 | 49.8 | 49.8 | 49.8   | 23.689 | 0.0000 | 323.31    | 79385000  | 350   | 19.07 | 18.75 | 19.15 | 19.05 | 18.09 | 18.15 | 18.32 | 18.13 |
| 2.725 | 0.83 | 1.78 Q7RWA  | RNA-directed RNA polymerase 1 subunit RPA43                             | Rpa43    | 2729 | 2  | 2  | 2  | 6.2  | 6.2  | 36.721 | 0.0000 | 27.750 | 2750000   | 26        | 14.39 | 14.68 | 14.70 | 14.68 | 14.39 | 14.68 | 14.70 | 14.68 |       |
| 2.505 | 0.83 | 1.78 Q5JH54 | ATP-dependent Clp protease ATP-binding subunit clpX-like, mitochondrion | Cltpx    | 5372 | 18 | 18 | 18 | 42.7 | 42.7 | 69.228 | 0.0000 | 120.34 | 16260000  | 262       | 15.25 | 14.70 | 15.32 | 15.25 | 14.20 | 14.11 | 14.58 | 14.20 |       |
| 2.674 | 0.83 | 1.78 P16546 | Spectrin alpha chain, non-erythrocytic 1                                | Sptan1   | 811  | 42 | 42 | 42 | 25.2 | 25.2 | 284.59 | 0.0000 | 299.32 | 37111000  | 407       | 16.00 | 15.59 | 15.64 | 16.03 | 14.70 | 14.93 | 15.08 | 15.22 |       |
| 0.237 | 0.83 | 1.78 Q8JUK9 | 24-hydroxycholesterol 7-alpha-hydroxylase                               | Cyp39a1  | 5452 | 1  | 1  | 1  | 2.8  | 2.8  | 1      | 53.574 | 0.0046 | 2.394     | 10979000  | 34    | 13.65 | 17.11 | 16.08 | 16.14 | 16.78 | 13.08 | 17.22 | 12.56 |
| 1.777 | 0.83 | 1.78 Q8J165 | T-lymphocyte surface antigen Lys-9                                      | Lys9     | 5182 | 18 | 18 | 18 | 31.2 | 31.2 | 31.2   | 142.88 | 0.0000 | 72.142    | 37174000  | 174   | 17.64 | 17.37 | 17.37 | 17.37 | 17.64 | 17.37 | 17.37 | 17.37 |
| 2.329 | 0.83 | 1.78 Q7V1V5 | Mitochondrial carrier homolog 2                                         | Mch2     | 2734 | 14 | 14 | 14 | 50.8 | 50.8 | 33.499 | 0.0000 | 323.31 | 157010000 | 471       | 20.08 | 19.39 | 19.88 | 20.09 | 19.13 | 18.74 | 19.17 | 19.08 |       |
| 1.465 | 0.83 | 1.78 Q8NS46 | Protein RRP5 homolog                                                    | Rpd3t1   | 2523 | 14 | 14 | 13 | 12.8 | 12.8 | 12.4   | 207.78 | 0.0000 | 81.074    | 10727000  | 139   | 15.08 | 14.49 | 15.68 | 15.48 | 14.44 | 14.48 | 14.59 | 13.90 |
| 1.163 | 0.83 | 1.78 Q8Z4T7 | E3 ubiquitin-protein ligase RNF31                                       | Rnf31    | 4301 | 14 | 14 | 14 | 20.2 | 20.2 | 119.31 | 0.0000 | 81.074 | 17895000  | 181       | 15.22 | 15.31 | 15.31 | 15.31 | 15.22 | 15.31 | 15.31 | 15.31 |       |
| 2.062 | 0.83 | 1.78 Q8DUP5 | Amyrin repeat domain-containing protein 13A                             | Ankrd13a | 2835 | 9  | 9  | 9  | 19.2 | 19.2 | 19.2   | 67.177 | 0.0000 | 27.678    | 8624200   | 143   | 15.21 | 14.85 | 15.75 | 15.27 | 14.28 | 14.30 | 14.77 | 14.40 |
| 2.425 | 0.83 | 1.78 Q8K2V1 | Serine/threonine-protein phosphatase 4 regulatory subunit 1             | Ppp4r1   | 3674 | 13 | 13 | 13 | 17.8 | 17.8 | 106.3  | 0.0000 | 31.539 | 21106000  | 155       | 17.11 | 16.56 | 17.25 | 17.08 | 16.12 | 16.27 | 16.37 | 15.92 |       |
| 2.931 | 0.83 | 1.77 Q8PRB6 | Leucine-rich PPR motif-containing protein, mitochondrial                | Lrppc    | 2612 | 65 | 65 | 65 | 53.7 | 53.7 | 156.61 | 0.0000 | 323.31 | 166370000 | 1158      | 17.46 | 17.32 | 17.56 | 17.56 | 17.46 | 17.32 | 17.56 | 17.56 |       |
| 1.521 | 0.83 | 1.77 Q8ER27 | OLR1 chaperone                                                          | Mesc2    | 5302 | 27 | 27 | 27 | 6.3  | 6.3  | 25.205 | 0.0000 | 15.488 | 9525200   | 60        | 16.78 | 16.68 | 16.68 | 16.68 | 16.78 | 16.68 | 16.68 | 16.68 |       |
| 1.255 | 0.83 | 1.77 Q8QV14 | DnaJ homolog subfamily B member 12                                      | DnaJb2   | 5574 | 10 | 10 | 10 | 34.3 | 34.3 | 41.987 | 0.0000 | 53.79  | 7056100   | 74        | 14.91 | 13.96 | 14.28 | 14.75 | 13.04 | 13.64 | 13.56 | 14.36 |       |
| 1.087 | 0.83 | 1.77 Q8DVS5 | Cullin-5                                                                | Cull5    | 4986 | 27 | 27 | 27 | 40.3 | 4    |        |        |        |           |           |       |       |       |       |       |       |       |       |       |

|       |             |                 |                                                                                 |         |      |    |    |    |       |       |       |        |        |        |          |       |       |       |       |       |       |       |       |       |
|-------|-------------|-----------------|---------------------------------------------------------------------------------|---------|------|----|----|----|-------|-------|-------|--------|--------|--------|----------|-------|-------|-------|-------|-------|-------|-------|-------|-------|
| 1.807 | 0.78        | 1.72 Q6R4R1     | Torsin-1B                                                                       | Tort1b  | 5294 | 5  | 5  | 5  | 18.5  | 18.5  | 18.5  | 37.817 | 0.0000 | 52.215 | 3889800  | 46    | 13.94 | 14.12 | 14.19 | 14.51 | 12.87 | 13.53 | 13.83 | 13.41 |
| 1.919 | 0.78        | 1.72 B2RXR6     | Serine/threonine-protein phosphatase 6 regulatory ankryin repeat subunit Ankr44 | Tort1b  | 85   | 32 | 32 | 31 | 35.8  | 35.8  | 34.7  | 107.38 | 0.0000 | 156.1  | 4994900  | 551   | 16.63 | 16.09 | 16.62 | 16.79 | 15.89 | 15.66 | 16.09 | 15.36 |
| 0.545 | 0.78        | 1.72 Q6C0H3     | NADH dehydrogenase [ubiquinone] 1 beta subcomplex subunit 5, mitochondrial      | Ndr44   | 4599 | 6  | 6  | 6  | 30.7  | 30.7  | 30.7  | 21.71  | 0.0000 | 39.829 | 1485600  | 88    | 16.27 | 15.88 | 15.88 | 15.16 | 16.04 | 13.54 | 16.08 | 14.44 |
| 2.184 | 0.78        | 1.72 Q6V8Z3     | Cleft lip and palate transmembrane protein 1 homolog                            | Cleft1  | 3902 | 14 | 14 | 14 | 27.7  | 27.7  | 27.7  | 75.29  | 0.0000 | 198.52 | 5189500  | 271   | 15.26 | 17.12 | 17.70 | 17.41 | 16.54 | 16.31 | 16.70 | 16.70 |
| 2.919 | 0.78        | 1.71 P50295:P50 | Arilamine N-acetyltransferase 2                                                 | Nat2    | 1178 | 9  | 9  | 9  | 46.2  | 46.2  | 46.2  | 33.701 | 0.0000 | 65.58  | 1890100  | 127   | 16.94 | 16.75 | 16.82 | 17.04 | 15.84 | 16.32 | 16.31 | 15.97 |
| 1.600 | 0.78        | 1.71 Q68738     | Baculoviral IAP repeat-containing protein 6                                     | Bin2    | 564  | 26 | 26 | 26 | 9.5   | 9.5   | 9.5   | 532.16 | 0.0000 | 151.08 | 3152500  | 1271  | 17.25 | 16.78 | 17.47 | 17.16 | 16.34 | 16.24 | 16.99 | 15.96 |
| 3.028 | 0.78        | 1.71 Q6BH43     | Neutral alpha-glucosidase AB                                                    | Ganab5  | 3049 | 41 | 41 | 41 | 47.1  | 47.1  | 47.1  | 106.91 | 0.0000 | 323.31 | 31120000 | 1230  | 18.80 | 18.60 | 18.77 | 19.02 | 18.23 | 17.84 | 18.14 | 17.88 |
| 2.360 | 0.78        | 1.71 Q51128     | Histone deacetylase complex subunit SAP18                                       | Sap18   | 4357 | 25 | 25 | 25 | 42.9  | 42.9  | 42.9  | 17.068 | 0.0000 | 77.541 | 1766900  | 130   | 16.79 | 16.82 | 16.88 | 16.45 | 16.68 | 15.70 | 16.45 | 15.68 |
| 2.641 | 0.78        | 1.71 Q6X030     | Flamin-B                                                                        | Flnb    | 2876 | 54 | 47 | 46 | 31.1  | 29.9  | 29.9  | 27.82  | 0.0000 | 192.54 | 46813000 | 124   | 16.41 | 16.25 | 16.48 | 16.15 | 15.41 | 15.69 | 15.83 | 15.24 |
| 1.041 | 0.78        | 1.71 Q6C133     | CWF19-like protein 1                                                            | Cwf19l1 | 3539 | 9  | 9  | 9  | 21.8  | 21.8  | 21.8  | 60.193 | 0.0000 | 47.316 | 4772900  | 59    | 14.78 | 14.58 | 14.17 | 13.77 | 13.15 | 12.89 | 14.22 | 13.93 |
| 0.78  | 1.71 Q6B2M1 | 3               | 3                                                                               | 3       | 3    | 3  | 3  | 3  | 17.55 | 17.55 | 17.55 | 3.1    | 0.0000 | 25.165 | 1438000  | 41    | 15.30 | 14.38 | 14.62 | 14.31 | 14.59 | 14.38 | 14.59 | 14.38 |
| 0.742 | 0.78        | 1.71 Q6CY28     | GTP-binding protein 8                                                           | Gtpb8   | 3181 | 3  | 3  | 3  | 17.5  | 17.5  | 17.5  | 31.872 | 0.0000 | 11.778 | 2525700  | 43    | 13.22 | 14.52 | 15.08 | 14.38 | 12.64 | 13.59 | 14.26 | 13.60 |
| 0.341 | 0.77        | 1.71 Q6E0V7     | Kinesin-like protein KIF13A                                                     | Kif13a  | 5290 | 5  | 5  | 5  | 3.3   | 3.3   | 3.3   | 195.81 | 0.0000 | 23.227 | 5142900  | 65    | 14.96 | 13.30 | 15.96 | 15.65 | 15.26 | 15.43 | 13.97 | 12.10 |
| 1.625 | 0.77        | 1.71 Q6B0V1     | E3 ubiquitin-protein ligase TRIM56                                              | Trim56  | 2850 | 9  | 9  | 9  | 19.8  | 19.8  | 19.8  | 79.512 | 0.0000 | 34.873 | 7428000  | 99    | 15.19 | 14.69 | 15.01 | 15.13 | 13.57 | 14.37 | 14.62 | 14.30 |
| 1.71  | 0.77        | 1.71 Q62889     | 60S ribosomal protein L2                                                        | L2      | 1463 | 13 | 13 | 13 | 18.6  | 18.6  | 18.6  | 12.784 | 0.0000 | 84.228 | 22735000 | 156   | 16.87 | 16.39 | 16.64 | 16.49 | 16.85 | 16.70 | 16.95 | 16.81 |
| 2.837 | 0.77        | 1.71 Q6QUM9     | Proteasome subunit alpha-type 6                                                 | PsmA6   | 1514 | 23 | 23 | 23 | 69.5  | 69.5  | 69.5  | 27.372 | 0.0000 | 168.53 | 28311000 | 1083  | 19.27 | 18.82 | 19.47 | 19.27 | 18.43 | 18.45 | 18.50 | 18.37 |
| 1.388 | 0.77        | 1.71 P53395     | Anaphase-promoting complex subunit 1                                            | Anapc1  | 2244 | 9  | 9  | 9  | 8.2   | 8.2   | 8.2   | 215.99 | 0.0000 | 38.677 | 7654200  | 80    | 15.65 | 15.12 | 15.15 | 15.34 | 14.59 | 14.78 | 15.02 | 13.77 |
| 1.415 | 0.77        | 1.71 Q69K0V     | T-cell immunomodulatory protein                                                 | Itg1    | 4398 | 2  | 2  | 2  | 6.1   | 6.1   | 6.1   | 67.464 | 0.0000 | 12.65  | 1558000  | 19    | 14.81 | 14.58 | 14.06 | 13.64 | 13.61 | 13.17 | 13.48 | 13.70 |
| 2.191 | 0.77        | 1.71 Q6D0D5     | General transcription factor IIE subunit 1                                      | Gtf2e1  | 4850 | 5  | 5  | 5  | 17.3  | 17.3  | 17.3  | 49.593 | 0.0000 | 77.531 | 2494700  | 39    | 14.71 | 14.11 | 14.88 | 14.62 | 13.66 | 14.00 | 13.91 | 13.65 |
| 1.363 | 0.77        | 1.71 P62358     | Ubiquitin-conjugating enzyme E2 D2                                              | Ube2d2  | 1451 | 5  | 2  | 2  | 48.3  | 12.2  | 12.2  | 16.735 | 0.0034 | 2.494  | 1847400  | 12    | 13.05 | 13.03 | 13.28 | 13.52 | 12.93 | 12.26 | 12.89 | 11.74 |
| 0.915 | 0.77        | 1.71 Q6C2H3     | Proteasome assembly chaperone 3                                                 | Pom3    | 4920 | 4  | 4  | 4  | 50.8  | 50.8  | 50.8  | 13.331 | 0.0000 | 34.994 | 12456000 | 85    | 16.42 | 15.52 | 16.29 | 16.13 | 15.59 | 15.74 | 15.77 | 14.59 |
| 1.542 | 0.77        | 1.71 Q3UKJ7     | WD40 repeat-containing protein SMU1/WD40 repeat-containing protein Smu1         | Smu1    | 1988 | 18 | 18 | 18 | 41.9  | 41.9  | 41.9  | 57.543 | 0.0000 | 131.58 | 40524000 | 332   | 16.17 | 16.21 | 16.81 | 16.89 | 15.98 | 15.70 | 16.08 | 15.24 |
| 2.279 | 0.77        | 1.71 D3Z7P3     | Glutaminase kidney isoform, mitochondrial                                       | Gls     | 215  | 30 | 30 | 30 | 53.3  | 53.3  | 53.3  | 73.963 | 0.0000 | 306.86 | 78178000 | 550   | 17.59 | 17.32 | 17.45 | 17.74 | 16.63 | 16.38 | 17.08 | 16.93 |
| 1.353 | 0.77        | 1.71 Q678Y5     | Glucoylase 2 subunit beta                                                       | Pfkfb3  | 300  | 9  | 9  | 9  | 15.4  | 15.4  | 15.4  | 58.792 | 0.0000 | 22.439 | 2485200  | 167   | 16.64 | 16.81 | 16.34 | 16.93 | 16.72 | 15.70 | 15.75 | 15.45 |
| 0.999 | 0.77        | 1.71 Q6W0C6     | Inactive ribonitoid protein 2                                                   | Ribtd2  | 2865 | 7  | 7  | 7  | 10.5  | 10.5  | 10.5  | 93.433 | 0.0000 | 16.725 | 2269100  | 18    | 13.11 | 13.54 | 14.64 | 13.45 | 13.51 | 12.79 | 12.90 | 12.46 |
| 2.707 | 0.77        | 1.71 Q6D0R2:Q8  | Threonine--RNA ligase, cytoplasmic                                              | Tars    | 4883 | 45 | 45 | 45 | 56.4  | 56.4  | 56.4  | 83.355 | 0.0000 | 25.64  | 13028000 | 862   | 17.33 | 17.03 | 17.42 | 17.47 | 16.58 | 16.58 | 16.77 | 16.24 |
| 1.203 | 0.77        | 1.70 P53612     | Geranylgeranyl transferase type-2 subunit beta                                  | Rabggbt | 1234 | 3  | 3  | 3  | 10.6  | 10.6  | 10.6  | 37.803 | 0.0000 | 8.195  | 6979300  | 35    | 15.73 | 15.02 | 16.12 | 16.29 | 15.39 | 15.24 | 14.88 | 14.57 |
| 1.950 | 0.77        | 1.70 P97333     | Neurapin-1                                                                      | Neap1   | 1624 | 26 | 26 | 26 | 10.6  | 10.6  | 10.6  | 103    | 0.0000 | 209.55 | 23227000 | 125   | 16.06 | 16.48 | 16.75 | 16.88 | 16.03 | 16.45 | 16.78 | 16.35 |
| 1.772 | 0.77        | 1.70 Q6E0U5     | Protein SET                                                                     | Set     | 589  | 8  | 8  | 8  | 29.1  | 29.1  | 29.1  | 33.377 | 0.0000 | 91.015 | 12395000 | 102   | 16.10 | 16.21 | 16.82 | 15.96 | 15.15 | 15.79 | 14.73 | 13.51 |
| 1.886 | 0.77        | 1.70 Q6D3Q0     | Putative RNA pseudouridine synthase Pus10                                       | Pus10   | 4970 | 8  | 8  | 8  | 20.7  | 20.7  | 20.7  | 59.71  | 0.0000 | 33.852 | 3845700  | 42    | 14.55 | 13.91 | 13.87 | 14.15 | 13.13 | 13.52 | 13.71 | 13.06 |
| 1.833 | 0.77        | 1.70 Q6J4V5     | Huntingtin-interacting protein 1-related protein 5                              | Hipr1   | 5405 | 4  | 4  | 4  | 5.5   | 5.5   | 5.5   | 4.43   | 0.0000 | 2.099  | 6544400  | 29    | 16.38 | 15.36 | 15.44 | 15.98 | 15.88 | 15.26 | 15.88 | 15.46 |
| 0.553 | 0.77        | 1.70 Q6K221     | ArfG2                                                                           | Arfg2   | 4642 | 4  | 4  | 4  | 15.8  | 15.8  | 15.8  | 37.772 | 0.0000 | 36.354 | 2576400  | 39    | 14.07 | 13.37 | 14.12 | 14.11 | 13.14 | 13.47 | 13.71 | 11.91 |
| 0.711 | 0.77        | 1.70 P70414     | Sodium/calcium exchanger 1                                                      | Sclca1  | 1569 | 3  | 3  | 3  | 4.9   | 4.9   | 4.9   | 108.03 | 0.0000 | 95.951 | 1351600  | 30    | 14.52 | 13.38 | 13.08 | 13.60 | 12.82 | 13.95 | 12.85 | 11.89 |
| 2.423 | 0.77        | 1.70 Q6K120     | Ubiquitinome biosynthesis protein COQ9, mitochondrial                           | Coq9    | 3537 | 8  | 8  | 8  | 34.5  | 34.5  | 34.5  | 35.082 | 0.0000 | 100.35 | 1124100  | 146   | 15.76 | 15.59 | 15.71 | 15.90 | 14.99 | 14.88 | 15.31 | 15.11 |
| 1.843 | 0.77        | 1.70 P65552     | Protein-dependent covalent phosphorylation II-oxidase, mitochondrial            | Cyp11b  | 1852 | 10 | 10 | 10 | 4.9   | 4.9   | 4.9   | 71.74  | 0.0000 | 43.983 | 13898000 | 154   | 14.74 | 14.74 | 14.84 | 15.18 | 14.36 | 14.28 | 14.59 | 14.36 |
| 2.489 | 0.77        | 1.70 Q6L6R1     | Monocacylglycerol lipase ABHD12                                                 | Abhd12  | 4444 | 30 | 30 | 30 | 73.6  | 73.6  | 73.6  | 45.269 | 0.0000 | 32.31  | 16853000 | 668   | 18.66 | 18.18 | 18.44 | 18.31 | 17.47 | 17.50 | 18.01 | 17.56 |
| 0.911 | 0.77        | 1.70 P53690     | Metallothionein-like protein                                                    | Mmp14   | 1235 | 8  | 8  | 8  | 14.1  | 14.1  | 14.1  | 65.918 | 0.0000 | 125.71 | 6170800  | 71    | 15.08 | 15.08 | 15.61 | 15.85 | 14.36 | 15.72 | 14.48 | 13.98 |
| 1.143 | 0.77        | 1.70 Q6B5S9     | Arp1                                                                            | Arp1    | 3102 | 4  | 4  | 4  | 4.4   | 4.4   | 4.4   | 5.633  | 0.0000 | 31.106 | 42       | 14.12 | 14.47 | 14.84 | 14.84 | 13.76 | 14.08 | 14.57 | 14.36 |       |
| 0.979 | 0.76        | 1.70 Q6R2Q0     | Nucleoporin SEH1                                                                | Seh1    | 3801 | 11 | 11 | 11 | 44.4  | 44.4  | 44.4  | 39.774 | 0.0000 | 69.365 | 1387300  | 129   | 15.02 | 15.38 | 15.85 | 15.68 | 15.22 | 14.68 | 15.25 | 13.72 |
| 1.716 | 0.76        | 1.70 Q6D1L7     | Protein MON2 homolog                                                            | Mon2    | 2827 | 9  | 9  | 9  | 9     | 9     | 9     | 189.08 | 0.0000 | 58.786 | 9242400  | 83    | 15.53 | 15.08 | 15.67 | 15.56 | 15.13 | 14.17 | 14.85 | 14.63 |
| 1.531 | 0.76        | 1.70 Q6D3Q5     | Syntaxin-11                                                                     | Sxt11   | 4966 | 8  | 8  | 8  | 36.2  | 36.2  | 36.2  | 33.369 | 0.0000 | 27.108 | 18701000 | 110   | 16.59 | 16.55 | 16.38 | 16.87 | 15.88 | 15.25 | 16.46 | 15.54 |
| 1.580 | 0.76        | 1.70 P10206     | RabA-related protein Rab-8B                                                     | Rab8b   | 1987 | 16 | 16 | 16 | 19.8  | 19.8  | 19.8  | 18.29  | 0.0000 | 18.29  | 12032000 | 50    | 19.06 | 17.85 | 18.29 | 18.29 | 18.79 | 16.98 | 17.85 | 17.85 |
| 1.331 | 0.76        | 1.70 P70451     | Tyrosine-protein kinase Fer                                                     | Fer     | 1576 | 4  | 3  | 3  | 5.8   | 5.8   | 5.8   | 94.578 | 0.0000 | 63.384 | 1301200  | 10    | 13.77 | 13.87 | 13.48 | 13.99 | 12.45 | 13.51 | 12.60 | 13.50 |
| 1.907 | 0.76        | 1.70 Q6K2D3     | Enhancer of mRNA-decapping protein 3                                            | Edc3    | 3657 | 11 | 11 | 11 | 32.1  | 32.1  | 32.1  | 55.957 | 0.0000 | 30.791 | 7669900  | 113   | 15.05 | 14.35 | 14.62 | 14.87 | 13.64 | 14.02 | 14.38 | 13.83 |
| 1.71  | 0.76        | 1.70 Q6K012     | Norm-binding protein 1-like                                                     | Nbp1l   | 3591 | 23 | 23 | 23 | 21.8  | 21.8  | 21.8  | 69.883 | 0.0000 | 32.73  | 1484000  | 87    | 14.84 | 14.62 | 14.84 | 14.84 | 14.46 | 14.68 | 15.31 | 15.21 |
| 1.553 | 0.76        | 1.70 Q6VEE4     | Replication protein A 70 kDa DNA-binding subunit/Replication protein A Rpa1     | Rpa1    | 4002 | 16 | 16 | 16 | 28.9  | 28.9  | 28.9  | 69.036 | 0.0000 | 111.83 | 23353000 | 240   | 15.91 | 15.36 | 15.66 | 16.18 | 15.23 | 15.28 | 15.36 | 15.40 |
| 0.735 | 0.76        | 1.70 Q6B8M6     | Mitochondrial folate transporter carrier                                        | Scl2a32 | 3137 | 2  | 2  | 2  | 13.3  | 13.3  | 13.3  | 35.048 | 0.0000 | 22.891 | 1380200  | 29    | 13.86 | 13.40 | 13.37 | 13.78 | 12.64 | 12.73 | 14.18 | 11.81 |
| 1.739 | 0.76        | 1.70 Q6D8B8     | Trans-1,2-dihydroxybenzoate 1,2-diol dehydrogenase                              | Dhdh    | 5140 | 16 | 16 | 16 | 53.8  | 53.8  | 53.8  | 36.3   | 0.0000 | 234.29 | 2983700  | 282   | 16.06 | 15.60 | 16.12 | 16.09 | 15.30 | 14.85 | 14.84 | 15.74 |
| 0.763 | 0.76        | 1.69 Q6A521     | Oxidoreductase                                                                  | Oxbr9   | 163  | 17 | 17 | 17 | 28.8  | 28.8  | 28.8  | 56.744 | 0.0000 | 56.744 | 2545600  | 188   | 16.63 | 16.32 | 16.45 | 16.63 | 15.83 | 15.67 | 16.02 | 15.83 |
| 2.274 | 0.76        | 1.69 Q6Q790     | Ras GTPase-activating protein 3                                                 | Rasa3   | 3208 | 29 | 29 | 29 | 37.4  | 37.4  | 37.4  | 95.986 | 0.0000 | 117.72 | 32224000 | 290   | 15.90 | 15.54 | 15.99 | 16.01 | 15.04 | 14.93 | 15.52 | 14.92 |
| 0.515 | 0.76        | 1.              |                                                                                 |         |      |    |    |    |       |       |       |        |        |        |          |       |       |       |       |       |       |       |       |       |

|       |      |      |        |                                                                   |         |      |    |    |      |      |         |        |         |           |     |       |       |       |       |       |       |       |       |
|-------|------|------|--------|-------------------------------------------------------------------|---------|------|----|----|------|------|---------|--------|---------|-----------|-----|-------|-------|-------|-------|-------|-------|-------|-------|
| 2.890 | 0.72 | 1.65 | 070435 | Proteasome subunit alpha type-3                                   | Pama3   | 498  | 21 | 21 | 69.4 | 69.4 | 28.405  | 0.0000 | 23.711  | 30803000  | 525 | 20.63 | 20.25 | 20.55 | 20.60 | 19.87 | 19.71 | 19.99 | 19.55 |
| 2.291 | 0.72 | 1.65 | 08K407 | Ceramide kinase                                                   | Cerk    | 3726 | 5  | 5  | 14.3 | 14.3 | 69.4    | 0.0000 | 23.475  | 5033000   | 71  | 15.41 | 14.96 | 15.28 | 14.93 | 14.07 | 14.57 | 14.49 | 14.51 |
| 3.160 | 0.72 | 1.65 | 08K408 | 26S proteasome non-ATPase regulatory subunit 3                    | Pamr3   | 744  | 39 | 39 | 60.9 | 60.9 | 60.9    | 0.0000 | 32.331  | 15438000  | 978 | 18.11 | 17.65 | 17.76 | 17.85 | 17.23 | 16.96 | 17.17 | 17.10 |
| 2.395 | 0.72 | 1.65 | E9C212 | 2.4-diethyl-OGC reductase, mitochondrial                          | Dem3    | 4566 | 13 | 13 | 47.2 | 47.2 | 237.7   | 0.0000 | 113.154 | 48916000  | 267 | 15.77 | 15.42 | 15.53 | 15.65 | 15.77 | 15.72 | 14.97 |       |
| 2.215 | 0.72 | 1.65 | 09C262 | 2,4-diethyl-OGC reductase, mitochondrial                          | Pamc3   | 4566 | 13 | 13 | 47.2 | 47.2 | 237.7   | 0.0000 | 113.154 | 48916000  | 267 | 17.38 | 16.75 | 17.20 | 17.14 | 16.35 | 16.33 | 16.72 | 16.19 |
| 2.328 | 0.72 | 1.65 | 035704 | Serine palmitoyltransferase 1                                     | Sptc1   | 4061 | 17 | 17 | 46.3 | 46.3 | 52.534  | 0.0000 | 192.41  | 34782000  | 281 | 16.71 | 16.58 | 16.98 | 16.84 | 16.04 | 16.04 | 16.41 | 15.72 |
| 1.735 | 0.72 | 1.65 | 09V2C8 | Alto-lectin domain family 1 member C13                            | Nlr13   | 392  | 17 | 17 | 47.4 | 47.4 | 17.068  | 0.0000 | 17.068  | 8817000   | 141 | 17.58 | 17.14 | 17.27 | 17.30 | 17.02 | 17.02 | 16.72 | 16.80 |
| 3.081 | 0.72 | 1.65 | 09J477 | Customer subunit beta                                             | Cobp1   | 5397 | 43 | 43 | 52.7 | 52.7 | 117.076 | 0.0000 | 32.331  | 143740000 | 870 | 18.81 | 18.62 | 18.70 | 18.81 | 18.11 | 17.77 | 18.26 | 17.92 |
| 0.603 | 0.72 | 1.65 | 08Y047 | Platelet-activating factor acetylcholinesterase 2, cytoplasmic    | Dack2   | 3953 | 10 | 10 | 35.1 | 35.1 | 43.561  | 0.0000 | 22.493  | 3318000   | 26  | 14.17 | 14.04 | 14.48 | 13.09 | 13.53 | 14.44 | 12.72 | 12.69 |
| 1.427 | 0.72 | 1.65 | 08Y017 | Logman                                                            | Logm    | 295  | 17 | 17 | 35.7 | 35.7 | 49.372  | 0.0000 | 63.071  | 10304000  | 129 | 15.31 | 15.07 | 15.19 | 15.31 | 15.31 | 15.45 | 14.26 | 14.35 |
| 1.489 | 0.72 | 1.65 | P59764 | Dedicator of cytokinesis protein 14                               | Potk1   | 344  | 17 | 16 | 12.1 | 12.1 | 226.55  | 0.0000 | 44.204  | 11875000  | 127 | 15.59 | 14.84 | 15.21 | 15.25 | 14.60 | 14.12 | 15.05 | 14.23 |
| 0.739 | 0.72 | 1.65 | 08B8V5 | ADP-ribosyl phosphotransferase, mitochondrial                     | Nudr9   | 3248 | 6  | 6  | 18.9 | 18.9 | 38.604  | 0.0000 | 6.6519  | 1533500   | 20  | 12.14 | 13.88 | 12.86 | 13.44 | 12.73 | 12.98 | 11.95 | 11.78 |
| 0.978 | 0.72 | 1.65 | 03J8X0 | Transmembrane protein 108                                         | Trnm109 | 1842 | 3  | 3  | 11.1 | 11.1 | 3.3     | 0.0000 | 5.6461  | 22693000  | 57  | 17.67 | 17.05 | 17.77 | 17.88 | 16.27 | 14.70 | 17.50 | 16.43 |
| 0.732 | 0.72 | 1.65 | 08W1E9 | Protein kinase C and casein kinase substrate in neurons protein 2 | Pkn2    | 746  | 27 | 27 | 27.6 | 27.6 | 27.6    | 0.0000 | 27.6    | 8196000   | 117 | 16.86 | 16.86 | 16.86 | 16.86 | 16.86 | 16.86 | 16.86 | 16.86 |
| 2.067 | 0.72 | 1.64 | P20481 | High affinity immunoglobulin epsilon receptor subunit gamma       | Fcgr1g  | 856  | 4  | 4  | 3.6  | 3.6  | 6.6523  | 0.0000 | 77.006  | 240180000 | 223 | 20.56 | 19.91 | 20.63 | 20.57 | 19.73 | 19.78 | 19.82 | 19.47 |
| 0.705 | 0.72 | 1.64 | P52019 | Squalene monooxygenase                                            | Sqle    | 1212 | 3  | 3  | 8.9  | 8.9  | 63.769  | 0.0000 | 25.084  | 2157800   | 27  | 12.96 | 13.30 | 14.22 | 14.65 | 12.46 | 13.61 | 12.63 | 13.56 |
| 1.735 | 0.72 | 1.64 | Q9R0N6 | Galactokinase                                                     | Galk1   | 5730 | 29 | 29 | 30.9 | 30.9 | 22.955  | 0.0000 | 21.676  | 1660000   | 83  | 12.54 | 12.54 | 12.54 | 12.54 | 12.54 | 12.54 | 12.54 | 12.54 |
| 1.100 | 0.72 | 1.64 | 079175 | Mitochondrial carnitine homolog                                   | Mch1    |      |    |    |      |      |         |        |         |           |     |       |       |       |       |       |       |       |       |

|       |      |      |        |                                                                               |          |       |      |      |      |      |      |      |        |        |         |           |         |        |       |       |       |       |       |       |       |       |
|-------|------|------|--------|-------------------------------------------------------------------------------|----------|-------|------|------|------|------|------|------|--------|--------|---------|-----------|---------|--------|-------|-------|-------|-------|-------|-------|-------|-------|
| 2.857 | 0.67 | 1.59 | P84091 | AP-2 complex subunit mu                                                       | Ap2m1    | 1608  | 30   | 30   | 30   | 62.5 | 62.5 | 62.5 | 49.654 | 0.0000 | 133.45  | 158780000 | 6393    | 18.60  | 18.16 | 18.18 | 18.34 | 17.63 | 17.56 | 17.83 | 17.57 |       |
| 2.507 | 0.67 | 1.59 | P35831 | Tyrosine-protein phosphatase non-receptor type 12                             | Hppn12   | 1034  | 20   | 20   | 20   | 29.7 | 29.7 | 29.7 | 86.525 | 0.0000 | 90.103  | 29891000  | 259     | 16.25  | 15.80 | 16.34 | 16.19 | 15.61 | 15.26 | 15.55 | 15.48 |       |
| 1.662 | 0.67 | 1.59 | O8B859 | Heterogeneous nuclear ribonucleoproteins A2B1                                 | HnRnp2b1 | 1047  | 36   | 36   | 36   | 78.8 | 78.8 | 78.8 | 37.402 | 0.0000 | 323.31  | 48760000  | 1091    | 19.86  | 20.18 | 19.25 | 19.88 | 18.88 | 19.10 | 19.13 | 19.37 |       |
| 2.969 | 0.67 | 1.59 | Q8V265 | Phosphatidyle 3-kinase regulatory subunit 4                                   | Prksh4   | 3942  | 26   | 26   | 26   | 27.5 | 27.5 | 27.5 | 152.6  | 0.0000 | 154.35  | 21307000  | 259     | 15.52  | 15.66 | 15.90 | 15.63 | 15.02 | 15.15 | 15.32 | 15.04 |       |
| 1.596 | 0.67 | 1.59 | Q922H2 | [Pyruvate dehydrogenase (acetyl-transferring) kinase isozyme 3, mitochondrial | Pdk3     | 4257  | 10   | 10   | 10   | 34.2 | 34.2 | 34.2 | 47.922 | 0.0000 | 42.272  | 12342000  | 146     | 15.82  | 15.26 | 16.08 | 15.80 | 14.71 | 15.36 | 14.94 | 15.25 |       |
| 1.535 | 0.67 | 1.59 | Q5SUQ9 | CST complex subunit CTC1                                                      | Ctc1     | 2417  | 12   | 12   | 12   | 17.4 | 17.4 | 17.4 | 134.03 | 0.0000 | 14.26   | 11796000  | 150     | 15.46  | 15.04 | 15.15 | 15.30 | 14.71 | 13.93 | 14.68 | 14.93 |       |
| 1.999 | 0.67 | 1.59 | Q8RQD3 | Protein unc-45 homolog A                                                      | Unc45a   | 4371  | 17   | 17   | 17   | 21.3 | 21.3 | 21.3 | 103.45 | 0.0000 | 73.599  | 19020000  | 144     | 16.09  | 15.79 | 16.25 | 16.29 | 15.41 | 15.22 | 15.64 | 15.25 |       |
| 2.619 | 0.67 | 1.59 | Q8R8B3 | Succinate dehydrogenase [ubiquinone]                                          | Sdhb     | 3653  | 39   | 39   | 39   | 61.7 | 61.7 | 61.7 | 72.885 | 0.0000 | 323.31  | 182780000 | 969     | 17.72  | 16.86 | 18.14 | 18.16 | 17.72 | 17.50 | 17.14 | 17.65 |       |
| 1.891 | 0.67 | 1.59 | Q8VNB8 | WD repeat and FYVE domain-containing protein 3                                | Wdfy3    | 2384  | 27   | 27   | 27   | 11.1 | 11.1 | 11.1 | 392.33 | 0.0000 | 93.661  | 16395000  | 161     | 15.22  | 14.70 | 15.51 | 15.03 | 14.59 | 14.20 | 14.57 | 14.41 |       |
| 0.522 | 0.67 | 1.59 | Q8KQ10 | Triple functional domain protein                                              | Trio     | 1375  | 7    | 7    | 7    | 3.8  | 3.8  | 3.8  | 347.86 | 0.0000 | 58.286  | 3848400   | 34      | 14.47  | 14.57 | 15.21 | 13.30 | 13.59 | 12.59 | 14.67 | 14.03 |       |
| 2.147 | 0.67 | 1.59 | Q8KH11 | Argininosuccinate synthase                                                    | Arg1     | 1769  | 27   | 27   | 27   | 81.0 | 81.0 | 81.0 | 46.584 | 0.0000 | 291.54  | 91030000  | 408     | 18.15  | 17.79 | 18.46 | 17.26 | 16.94 | 16.96 | 17.48 | 17.08 |       |
| 2.250 | 0.67 | 1.59 | Q8BZV8 | NHL repeat-containing protein                                                 | Nhlr2    | 17220 | 9    | 9    | 9    | 19.7 | 19.7 | 19.7 | 78.429 | 0.0000 | 27.413  | 9063300   | 89      | 15.58  | 15.48 | 15.12 | 15.46 | 14.45 | 14.86 | 15.02 | 14.63 |       |
| 0.720 | 0.67 | 1.59 | BZRR83 | Probable ATP-dependent RNA helicase YTHDC2                                    | Ythdc2   | 78    | 6    | 6    | 6    | 7    | 7    | 7    | 161.09 | 0.0000 | 9.909   | 2252300   | 23      | 13.57  | 13.28 | 14.52 | 13.55 | 12.23 | 14.00 | 13.01 | 13.00 |       |
| 1.280 | 0.67 | 1.59 | Q52K08 | Serine/threonine repetitive matrix protein 1                                  | Srm1     | 2094  | 12   | 12   | 12   | 5.4  | 5.4  | 5.4  | 106.86 | 0.0000 | 90.767  | 14378000  | 129     | 17.17  | 16.60 | 16.15 | 16.75 | 15.44 | 15.64 | 16.00 | 15.04 |       |
| 2.268 | 0.67 | 1.59 | Q922J3 | CAP-Gly domain-containing linker protein 1                                    | Cblp1    | 4280  | 12   | 12   | 10   | 10.4 | 10.4 | 9.3  | 155.81 | 0.0000 | 54.62   | 5278500   | 70      | 14.76  | 14.55 | 14.71 | 15.05 | 13.99 | 14.37 | 14.05 | 14.03 |       |
| 2.119 | 0.67 | 1.59 | P06795 | Multidrug resistance protein 18                                               | Abcd1b   | 6012  | 33   | 33   | 33   | 33.2 | 33.2 | 33.2 | 140.99 | 0.0000 | 323.31  | 55450000  | 573     | 16.32  | 15.97 | 16.69 | 16.57 | 15.56 | 15.82 | 15.70 | 15.79 |       |
| 3.219 | 0.67 | 1.59 | Q8B8H9 | Calcium-binding mitochondrial carrier protein Aralar1                         | Slc25a12 | 3655  | 41   | 41   | 35   | 71.9 | 71.9 | 65.6 | 74.569 | 0.0000 | 323.31  | 23286000  | 1068    | 18.58  | 18.45 | 18.82 | 18.62 | 17.97 | 17.84 | 18.13 | 17.86 |       |
| 2.000 | 0.67 | 1.59 | Q53375 | Tubulin domain-containing protein 7                                           | Tubd7    | 3527  | 7    | 7    | 7    | 11.3 | 11.3 | 11.3 | 122.17 | 0.0000 | 43.844  | 6371500   | 62      | 15.19  | 14.54 | 14.83 | 14.59 | 14.49 | 13.87 | 14.25 | 14.18 |       |
| 3.439 | 0.67 | 1.59 | Q62348 | Nucleolin-2                                                                   | Np2      | 383   | 10   | 10   | 10   | 13.3 | 13.3 | 13.3 | 104.63 | 0.0000 | 56.296  | 16496000  | 132     | 16.22  | 16.08 | 16.77 | 16.64 | 15.89 | 15.78 | 15.82 | 15.55 |       |
| 2.132 | 0.67 | 1.59 | Q8VDV8 | GRP1-associated protein 1                                                     | Grp1     | 3338  | 17   | 17   | 17   | 28.8 | 28.8 | 28.8 | 92.714 | 0.0000 | 132.87  | 7342000   | 91      | 14.56  | 14.42 | 14.56 | 14.55 | 14.17 | 13.71 | 14.15 | 13.93 |       |
| 2.942 | 0.67 | 1.59 | Q5DTM8 | E3 ubiquitin-protein ligase BRE1A                                             | Rn20     | 2096  | 16   | 16   | 16   | 24.9 | 24.9 | 24.9 | 113.52 | 0.0000 | 80.923  | 15888000  | 99      | 16.67  | 16.42 | 16.70 | 16.71 | 16.18 | 16.05 | 15.78 | 15.84 |       |
| 1.437 | 0.66 | 1.59 | P48410 | ATP-binding cassette sub-family D member 1                                    | Abcd1    | 1143  | 22   | 22   | 22   | 32.5 | 32.5 | 32.5 | 81.858 | 0.0000 | 143.79  | 41061000  | 346     | 17.13  | 16.43 | 16.79 | 17.23 | 16.12 | 15.80 | 16.46 | 16.54 |       |
| 3.416 | 0.66 | 1.59 | Q8QJX4 | Calcium-binding mitochondrial carrier protein Aralar2                         | Slc25a13 | 5554  | 40   | 34   | 34   | 72.6 | 66.7 | 66.7 | 74.466 | 0.0000 | 323.31  | 19852000  | 822     | 18.90  | 18.59 | 18.87 | 18.88 | 18.29 | 18.01 | 18.19 | 18.09 |       |
| 1.587 | 0.66 | 1.59 | Q53564 | Membrane-associated phosphatidylinositol transfer protein 1                   | Pitpn1   | 413   | 8    | 8    | 8    | 10.5 | 10.5 | 10.5 | 134.94 | 0.0000 | 60.242  | 5312200   | 77      | 14.26  | 14.38 | 14.65 | 14.46 | 14.03 | 13.16 | 14.05 | 13.85 |       |
| 1.711 | 0.66 | 1.59 | P97449 | Aminopeptidase N                                                              | Anpep    | 1650  | 57   | 57   | 57   | 51.2 | 51.2 | 51.2 | 106.65 | 0.0000 | 323.31  | 68356000  | 2077    | 19.81  | 19.50 | 20.06 | 20.24 | 19.09 | 18.93 | 19.52 | 19.41 |       |
| 0.888 | 0.66 | 1.59 | Q8CB86 | Transmembrane protein 230                                                     | Tmem230  | 3547  | 3    | 3    | 3    | 21.7 | 21.7 | 21.7 | 13.188 | 0.0000 | 8.368   | 2666700   | 25      | 13.36  | 13.28 | 13.69 | 13.46 | 13.72 | 12.47 | 12.93 | 12.00 |       |
| 1.639 | 0.66 | 1.59 | P43377 | Aldose reductase-related protein 2                                            | Alr2     | 643   | 21   | 21   | 21   | 64.9 | 64.9 | 64.9 | 36.12  | 0.0000 | 22.73   | 16893000  | 66      | 13.81  | 13.67 | 13.85 | 13.84 | 13.16 | 13.16 | 13.14 | 13.14 |       |
| 1.678 | 0.66 | 1.59 | Q8C171 | Colel-coiled domain-containing protein 132                                    | Codc132  | 3547  | 10   | 10   | 10   | 15   | 15   | 15   | 111.17 | 0.0000 | 97.473  | 17384000  | 176     | 15.94  | 15.64 | 15.86 | 16.11 | 14.67 | 15.39 | 15.33 | 15.51 |       |
| 2.118 | 0.66 | 1.59 | Q80884 | Stress-induced-phosphoprotein 1                                               | Sip1     | 2214  | 51   | 51   | 51   | 74.6 | 74.6 | 74.6 | 62.581 | 0.0000 | 323.31  | 244710000 | 1268    | 18.42  | 18.86 | 18.09 | 18.36 | 17.78 | 17.64 | 17.77 | 17.88 |       |
| 0.145 | 0.66 | 1.59 | Q70461 | E3 ubiquitin-protein ligase UBR1                                              | Ubr1     | 501   | 2    | 2    | 2    | 50.1 | 50.1 | 50.1 | 204.34 | 0.0000 | 32.31   | 3.555     | 1776200 | 126    | 14.51 | 14.08 | 14.61 | 14.51 | 13.59 | 13.68 | 13.74 | 13.74 |
| 1.455 | 0.66 | 1.59 | Q5V164 | Isochorismatase domain-containing protein 1                                   | Isc1     | 4508  | 12   | 12   | 12   | 45.5 | 45.5 | 45.5 | 32.032 | 0.0000 | 57.42   | 34732000  | 239     | 16.89  | 16.73 | 17.31 | 17.11 | 16.51 | 16.19 | 16.37 | 16.34 |       |
| 0.815 | 0.66 | 1.59 | Q8RQ20 | Zinc finger Ran-binding domain-containing protein 2                           | Zranb2   | 1851  | 3    | 3    | 3    | 10.3 | 10.3 | 10.3 | 37.35  | 0.0002 | 5.881   | 2273000   | 41      | 13.93  | 13.96 | 14.31 | 14.36 | 13.62 | 12.49 | 14.38 | 13.42 |       |
| 1.159 | 0.66 | 1.59 | Q8B855 | Golgi pH regulator                                                            | Gp98a    | 3185  | 3    | 3    | 3    | 12.1 | 12.1 | 12.1 | 52.734 | 0.0000 | 10.022  | 5605100   | 51      | 14.12  | 14.10 | 14.71 | 15.24 | 13.60 | 14.03 | 14.14 | 13.75 |       |
| 1.401 | 0.66 | 1.59 | Q8BXD0 | Fibronectin type-III domain-containing protein 3A                             | Frc3a    | 1116  | 11.6 | 11.6 | 11.6 | 11.6 | 11.6 | 11.6 | 131.96 | 0.0000 | 28.593  | 12556000  | 16      | 15.07  | 15.68 | 16.07 | 15.68 | 14.86 | 15.14 | 15.14 | 15.14 |       |
| 1.194 | 0.66 | 1.59 | Q53405 | Phospholipase D3                                                              | Pld3     | 388   | 10   | 10   | 10   | 25.6 | 25.6 | 25.6 | 54.388 | 0.0000 | 61.453  | 25145000  | 114     | 16.68  | 17.36 | 17.36 | 16.71 | 15.77 | 16.35 | 16.56 | 16.79 |       |
| 2.274 | 0.66 | 1.59 | P37040 | NAD(P)+-cytochrome P450 reductase                                             | P450     | 1046  | 55   | 55   | 55   | 73.3 | 73.3 | 73.3 | 77.043 | 0.0000 | 323.31  | 51718000  | 1608    | 19.16  | 18.98 | 19.20 | 19.32 | 18.37 | 18.18 | 18.77 | 18.71 |       |
| 1.061 | 0.66 | 1.59 | P08030 | Adenosine phosphatidyltransferase                                             | Adp1     | 96    | 17   | 17   | 17   | 96.7 | 96.7 | 96.7 | 124.96 | 0.0000 | 265.05  | 285310000 | 644     | 19.42  | 19.20 | 19.33 | 19.33 | 18.37 | 18.37 | 18.37 | 18.37 |       |
| 0.685 | 0.66 | 1.59 | Q3UZ39 | Leucine-rich repeat flightless-interacting protein 1                          | Lrlp1    | 2046  | 9    | 8    | 8    | 18.9 | 17.3 | 17.3 | 79.248 | 0.0000 | 41.339  | 4674400   | 72      | 14.43  | 14.04 | 13.83 | 14.55 | 14.47 | 13.93 | 13.30 | 12.44 |       |
| 1.291 | 0.66 | 1.59 | Q8CEE7 | Retinol dehydrogenase 13                                                      | Rdh13    | 3473  | 9    | 9    | 9    | 38.9 | 38.9 | 38.9 | 36.464 | 0.0000 | 83.626  | 19061000  | 171     | 16.77  | 15.95 | 16.65 | 16.51 | 16.07 | 15.21 | 16.03 | 15.93 |       |
| 2.591 | 0.66 | 1.59 | Q8JUB4 | Phosphoinositide 3-kinase regulatory subunit 6                                | Pik3r    | 1930  | 9    | 9    | 9    | 18.9 | 18.9 | 18.9 | 84.662 | 0.0000 | 31.625  | 12400000  | 64      | 16.62  | 16.44 | 16.66 | 16.12 | 15.66 | 15.87 | 15.84 | 15.85 |       |
| 1.460 | 0.66 | 1.59 | Q8CB60 | Sectin-10                                                                     | Sect10   | 3403  | 5    | 5    | 5    | 14.9 | 14.9 | 14.9 | 16.329 | 0.0000 | 16.329  | 6003000   | 15      | 15.422 | 14.90 | 15.29 | 15.29 | 15.22 | 14.97 | 15.22 | 14.97 |       |
| 1.565 | 0.66 | 1.59 | P10605 | Cathepsin B,Cathepsin B light chain,Cathepsin B heavy chain                   | Ctbs     | 724   | 23   | 23   | 23   | 62.8 | 62.8 | 62.8 | 37.279 | 0.0000 | 32.31   | 17127000  | 1505    | 20.97  | 21.17 | 20.73 | 21.02 | 20.52 | 19.77 | 20.24 | 20.73 |       |
| 2.544 | 0.66 | 1.59 | Q8WTV6 | Cullin-1                                                                      | Cul1     | 5662  | 31   | 31   | 31   | 41.8 | 41.8 | 41.8 | 89.69  | 0.0000 | 323.31  | 78550000  | 621     | 17.91  | 17.40 | 17.73 | 17.73 | 16.91 | 17.05 | 17.27 | 16.92 |       |
| 1.061 | 0.66 | 1.59 | Q8BXD0 | Adenosine ribosomal protein S30, mitochondrial                                | Mrs30    | 4893  | 12   | 12   | 12   | 12.7 | 12.7 | 12.7 | 93.926 | 0.0000 | 35.4    | 10593000  | 16      | 16.34  | 16.34 | 16.58 | 16.58 | 16.34 | 16.34 | 16.34 | 16.34 |       |
| 1.965 | 0.66 | 1.59 | Q3UCV8 | Ubiquitin thioesterase domain                                                 | Cu1      | 1945  | 9    | 9    | 9    | 34.7 | 34.7 | 34.7 | 40.32  | 0.0000 | 24.8    | 21603000  | 164     | 16.01  | 15.88 | 16.22 | 16.40 | 15.57 | 15.36 | 15.80 | 15.16 |       |
| 1.906 | 0.66 | 1.59 | Q8BHL5 | Engulfment and cell motility protein 2                                        | Eln2     | 3045  | 23   | 17   | 17   | 42.2 | 38.1 | 38.1 | 83.886 | 0.0000 | 136.62  | 24623000  | 218     | 16.37  | 16.34 | 16.88 | 16.71 | 15.64 | 16.06 | 16.21 | 15.77 |       |
| 2.716 | 0.66 | 1.59 | Q8RL24 | COP9 signalosome complex subunit 1                                            | Cop9     | 4420  | 27   | 27   | 27   | 48.4 | 58.4 | 58.4 | 53.442 | 0.0000 | 120.123 | 41238000  | 415     | 17.06  | 16.74 | 16.92 | 17.28 | 16.25 | 16.25 | 16.47 | 16.40 |       |
| 1.597 | 0.67 | 1.59 | B8B5C7 | Endo-sphingomyelinase E1                                                      | Ensm1    | 2912  | 5    | 5    | 5    | 32.3 | 32.3 | 32.3 | 97.814 | 0.0000 | 5       | 4784600   | 5       | 14.85  | 14.20 | 14.85 | 14.85 | 14.42 | 14.42 | 14.42 | 14.42 |       |
| 2.248 | 0.65 | 1.57 | Q2TBE6 | Phosphatidylinositol 4-kinase type 2-alpha                                    | Pik2a    | 1801  | 17   | 17   | 17   | 46.3 | 46.3 |      |        |        |         |           |         |        |       |       |       |       |       |       |       |       |





|       |             |              |                                                                              |         |      |    |    |    |        |        |        |        |        |         |           |         |       |        |       |       |       |       |       |       |
|-------|-------------|--------------|------------------------------------------------------------------------------|---------|------|----|----|----|--------|--------|--------|--------|--------|---------|-----------|---------|-------|--------|-------|-------|-------|-------|-------|-------|
| 2.182 | 0.54        | 1.45 Q91V12  | Cytosolic acyl coenzyme A thioester hydrolase                                | Aco27   | 4043 | 14 | 14 | 14 | 39.4   | 39.4   | 39.4   | 42.536 | 0.0000 | 83.054  | 73204000  | 310     | 17.19 | 17.16  | 17.48 | 17.35 | 16.86 | 16.80 | 16.92 | 16.43 |
| 1.587 | 0.54        | 1.45 Q61735  | Leukocyte surface antigen CD47                                               | Cd47    | 2329 | 6  | 6  | 6  | 13.9   | 13.9   | 13.9   | 33.097 | 0.0000 | 133.3   | 39526000  | 311     | 18.09 | 17.80  | 18.39 | 17.83 | 17.34 | 17.74 | 17.65 | 17.23 |
| 1.891 | 0.54        | 1.45 Q6G079  | Nucleo modulator 1                                                           | Nomo1   | 2514 | 32 | 32 | 32 | 35.9   | 35.9   | 35.9   | 133.42 | 0.0000 | 247.28  | 94310000  | 564     | 17.70 | 17.39  | 17.60 | 17.82 | 17.40 | 16.74 | 17.24 | 16.97 |
| 1.383 | 0.54        | 1.45 Q08917  | Fibulin-1                                                                    | Fib1    | 312  | 19 | 19 | 19 | 52.8   | 52.8   | 52.8   | 47.513 | 0.0000 | 61.964  | 24446000  | 158     | 15.90 | 15.43  | 15.64 | 15.86 | 14.84 | 15.26 | 15.34 | 14.98 |
| 1.826 | 0.54        | 1.45 P43247  | DNA mismatch repair protein Msh2                                             | Msh2    | 1086 | 14 | 14 | 13 | 22.1   | 22.1   | 21.7   | 104.15 | 0.0000 | 87.573  | 11141000  | 110     | 15.79 | 15.43  | 15.40 | 15.74 | 15.21 | 15.20 | 15.10 | 14.69 |
| 1.425 | 0.54        | 1.45 P47758  | Signal recognition particle receptor subunit beta                            | Srpb    | 1122 | 16 | 16 | 16 | 62.8   | 62.8   | 62.8   | 29.579 | 0.0000 | 218.49  | 55836000  | 391     | 17.06 | 16.68  | 17.50 | 17.28 | 16.29 | 16.75 | 16.63 | 16.70 |
| 2.060 | 0.54        | 1.45 Q8K1X1  | WD repeat-containing protein 11                                              | Wdr11   | 3635 | 29 | 29 | 29 | 33.8   | 33.8   | 33.8   | 135.94 | 0.0000 | 296.77  | 26996000  | 322     | 16.15 | 15.58  | 16.02 | 15.79 | 15.41 | 15.15 | 15.40 | 15.42 |
| 1.122 | 0.54        | 1.45 Q1VEM1  | E3 ubiquitin-protein ligase RNF130                                           | Rnf130  | 4017 | 3  | 3  | 3  | 12.9   | 12.9   | 12.9   | 46.375 | 0.0000 | 8.608   | 1022700   | 20      | 13.39 | 13.375 | 14.11 | 13.35 | 13.26 | 13.34 | 13.42 | 13.05 |
| 0.983 | 0.54        | 1.45 Q0D885  | Ribosomal RNA-processing protein 8                                           | Rps8    | 1322 | 5  | 5  | 5  | 19.5   | 19.5   | 19.5   | 51.066 | 0.0000 | 193.55  | 3176400   | 39      | 14.29 | 14.16  | 14.57 | 14.49 | 13.99 | 13.12 | 14.38 | 13.87 |
| 1.252 | 0.54        | 1.45 Q08796  | Ribonuclease P protein subunit p30                                           | Rpp30   | 566  | 8  | 8  | 8  | 36.2   | 36.2   | 36.2   | 29.473 | 0.0000 | 33.31   | 6045300   | 83      | 15.20 | 14.99  | 15.21 | 14.91 | 15.06 | 14.24 | 14.72 | 14.14 |
| 0.54  | 1.45 Q08U65 | Septin-9     | Septin-9                                                                     | Sept9   | 2828 | 28 | 28 | 28 | 39.1   | 39.1   | 39.1   | 58.574 | 0.0000 | 323.31  | 108950000 | 709     | 17.25 | 17.88  | 17.77 | 17.68 | 17.77 | 17.48 | 17.48 | 17.18 |
| 1.263 | 0.54        | 1.45 P47753  | F-actin-capping protein subunit alpha-1                                      | Capa1   | 1119 | 24 | 19 | 19 | 83.9   | 73.8   | 73.8   | 32.939 | 0.0000 | 323.31  | 240370000 | 641     | 19.72 | 19.45  | 19.46 | 19.68 | 19.17 | 19.02 | 19.20 | 18.78 |
| 0.954 | 0.54        | 1.45 Q0WU29  | Ectonucleoside triphosphate diphosphohydrolase 5                             | Entpd5  | 5726 | 4  | 4  | 4  | 14.8   | 14.8   | 14.8   | 47.101 | 0.0004 | 4.8901  | 2070800   | 15      | 14.37 | 13.51  | 14.36 | 14.56 | 12.58 | 13.72 | 14.36 | 13.99 |
| 0.436 | 0.54        | 1.45 P30677  | Guanine nucleotide-binding protein subunit alpha-14                          | Gna14   | 979  | 3  | 3  | 3  | 25.1   | 14.1   | 14.1   | 6.527  | 0.0000 | 27.343  | 1636600   | 99      | 14.36 | 13.56  | 13.36 | 13.39 | 12.54 | 13.65 | 12.18 | 14.36 |
| 0.628 | 0.54        | 1.45 Q3UR03  | Sarcolemmal membrane-associated protein                                      | Simp    | 2021 | 12 | 12 | 12 | 16.9   | 16.9   | 16.9   | 16.537 | 0.0000 | 39.099  | 3887000   | 72      | 14.42 | 13.54  | 14.57 | 14.38 | 13.19 | 13.75 | 14.03 | 13.79 |
| 0.483 | 0.54        | 1.45 Q7TM03  | E3 ubiquitin-protein ligase UHRF2                                            | Uhrf2   | 2744 | 6  | 6  | 6  | 12.8   | 12.8   | 12.8   | 90.105 | 0.0000 | 29.682  | 8760700   | 55      | 15.27 | 15.59  | 15.83 | 15.84 | 15.67 | 15.35 | 15.71 | 13.66 |
| 0.282 | 0.54        | 1.45 Q8R502  | Volume-regulated anion channel subunit LVRSC6                                | Lrnc6   | 3878 | 4  | 4  | 4  | 8      | 8      | 8      | 92.371 | 0.0000 | 28.962  | 9688800   | 36      | 15.81 | 15.66  | 15.28 | 16.02 | 16.32 | 15.45 | 15.95 | 12.90 |
| 0.621 | 0.54        | 1.45 Q02V15  | Alpha-1,6-mannosyl-glycoprotein 2-beta-N-acetylglucosaminyltransferase       | Mgat2   | 4241 | 3  | 3  | 3  | 7.2    | 7.2    | 7.2    | 51.029 | 0.0000 | 8.7895  | 2400800   | 33      | 13.11 | 14.33  | 13.07 | 14.05 | 12.80 | 13.39 | 13.65 | 12.77 |
| 1.761 | 0.54        | 1.45 Q9C242  | ATP-dependent (S)-NAD(P)H-hydrate dehydratase                                | Cakd1   | 4487 | 12 | 12 | 12 | 54.2   | 54.2   | 54.2   | 36.717 | 0.0000 | 165.84  | 39397000  | 320     | 17.28 | 16.96  | 17.47 | 17.08 | 16.55 | 16.60 | 17.02 | 16.48 |
| 2.840 | 0.54        | 1.45 Q06073  | Histone-binding protein RBBP7                                                | Rbbp7   | 2232 | 11 | 11 | 11 | 29.4   | 29.4   | 29.4   | 14.7   | 0.0000 | 102.01  | 15592000  | 141     | 16.00 | 15.93  | 15.77 | 16.08 | 15.37 | 15.61 | 15.38 | 15.28 |
| 2.454 | 0.53        | 1.45 Q02024  | Vacuolar protein sorting-associated protein 16 homolog                       | Vps16   | 4213 | 27 | 27 | 27 | 41     | 41     | 41     | 94.927 | 0.0000 | 212.92  | 22340000  | 446     | 17.17 | 16.79  | 17.12 | 17.09 | 16.49 | 16.57 | 16.68 | 16.33 |
| 1.493 | 0.53        | 1.45 Q0D106  | Endoplasmic reticulum resident protein 44                                    | Erp44   | 4933 | 13 | 13 | 13 | 36.2   | 36.2   | 36.2   | 46.852 | 0.0000 | 150.11  | 24347000  | 254     | 16.18 | 16.19  | 16.00 | 16.10 | 15.75 | 16.03 | 15.26 | 15.29 |
| 1.138 | 0.53        | 1.45 Q0D1K7  | UPF0687 protein C20orf27 homolog                                             | Upf0687 | 4923 | 5  | 5  | 5  | 44.8   | 44.8   | 44.8   | 19.476 | 0.0000 | 12.407  | 6084200   | 52      | 14.62 | 15.41  | 15.51 | 15.37 | 14.49 | 14.99 | 14.43 | 14.85 |
| 1.119 | 0.53        | 1.45 Q0D8K5  | Synaptotagmin-2-binding protein                                              | Syn2bp  | 4998 | 4  | 4  | 4  | 37.2   | 37.2   | 37.2   | 15.815 | 0.0000 | 36.644  | 7915900   | 106     | 14.99 | 14.71  | 14.81 | 15.38 | 14.47 | 13.85 | 14.52 | 14.60 |
| 0.735 | 0.53        | 1.45 Q0J329  | Phospholipid scramblase 3                                                    | Plcb3   | 5413 | 3  | 3  | 3  | 14.9   | 14.9   | 14.9   | 31.802 | 0.0000 | 130.7   | 3450100   | 39      | 14.62 | 14.85  | 14.62 | 14.86 | 14.66 | 14.94 | 13.53 | 13.70 |
| 3.698 | 0.53        | 1.45 Q9WU78  | Programmed cell death 6-interacting protein                                  | Pcd6ip  | 5688 | 76 | 76 | 76 | 74.2   | 74.2   | 74.2   | 96.023 | 0.0000 | 323.31  | 53480000  | 2218    | 19.20 | 18.97  | 19.20 | 19.22 | 18.54 | 18.61 | 18.69 | 18.62 |
| 0.475 | 0.53        | 1.45 Q8K114  | Integrator complex subunit 9                                                 | Int9    | 1612 | 6  | 6  | 6  | 12.8   | 12.8   | 12.8   | 74.077 | 0.0000 | 13.897  | 2387100   | 21      | 14.89 | 13.21  | 13.34 | 12.87 | 12.89 | 13.22 | 12.48 | 13.59 |
| 1.105 | 0.53        | 1.45 Q1VGC3  | Macrophage erythroblast attachment                                           | Maes    | 2073 | 16 | 16 | 16 | 45.5   | 45.5   | 45.5   | 45.336 | 0.0000 | 88.478  | 22347000  | 211     | 15.66 | 15.30  | 15.66 | 15.66 | 15.66 | 15.66 | 15.66 | 15.66 |
| 1.105 | 0.53        | 1.45 P59017  | Bcl-2-like protein 13                                                        | Bcl2l13 | 3629 | 5  | 5  | 5  | 18.7   | 18.7   | 18.7   | 46.179 | 0.0000 | 103.67  | 12931000  | 93      | 16.02 | 15.58  | 15.65 | 15.60 | 15.66 | 15.58 | 15.48 | 15.54 |
| 1.532 | 0.53        | 1.45 Q0JL28  | MAP kinase-activating death domain protein                                   | Madd    | 2816 | 14 | 14 | 14 | 13.8   | 13.8   | 13.8   | 175.18 | 0.0000 | 87.13   | 13352000  | 133     | 15.32 | 15.03  | 15.53 | 15.02 | 14.62 | 14.69 | 15.07 | 14.40 |
| 1.545 | 0.53        | 1.45 Q0C228  | Hydralimycin (RNAi) amidotransferase subunit A, mitochondrial                | Hars    | 2816 | 35 | 35 | 35 | 18.5   | 18.5   | 18.5   | 75.629 | 0.0000 | 8.451   | 7569300   | 153     | 15.37 | 14.26  | 14.56 | 14.56 | 14.26 | 14.56 | 14.56 | 14.26 |
| 2.723 | 0.53        | 1.44 Q01C05  | Histidine--RNA ligase, cytoplasmic                                           | Hars    | 2816 | 35 | 35 | 35 | 18.5   | 18.5   | 18.5   | 75.629 | 0.0000 | 8.451   | 7569300   | 153     | 15.37 | 14.26  | 14.56 | 14.56 | 14.26 | 14.56 | 14.56 | 14.26 |
| 2.276 | 0.53        | 1.44 Q0C5H3  | Exosome complex exonuclease RRP44                                            | Dna3    | 4698 | 22 | 22 | 22 | 35.3   | 35.3   | 35.3   | 108.84 | 0.0000 | 112.13  | 21888000  | 316     | 15.98 | 15.51  | 15.85 | 15.92 | 15.22 | 15.34 | 15.45 | 15.15 |
| 2.324 | 0.53        | 1.44 Q0WV54  | Acid ceramidase; Acid ceramidase subunit alpha/Acid ceramidase subunit alpha | Asah1   | 5071 | 29 | 29 | 29 | 54.8   | 54.8   | 54.8   | 44.669 | 0.0000 | 200.45  | 26567000  | 803     | 18.59 | 18.32  | 18.26 | 18.34 | 18.08 | 17.63 | 17.90 | 17.78 |
| 0.169 | 0.53        | 1.44 Q0D810  | Transmembrane 9 superfamily member 1                                         | Tm9sf1  | 5178 | 2  | 2  | 2  | 5.0    | 5.0    | 5.0    | 1.927  | 0.0000 | 12.1    | 2059500   | 20      | 14.48 | 14.22  | 14.48 | 14.48 | 14.22 | 14.48 | 14.48 | 14.22 |
| 1.348 | 0.53        | 1.44 Q0B759  | Ubiquitin-protein ligase E3A                                                 | Uba3a   | 2966 | 15 | 15 | 15 | 25.7   | 25.7   | 25.7   | 99.818 | 0.0000 | 112.46  | 14874000  | 142     | 15.80 | 15.12  | 15.55 | 15.71 | 15.13 | 14.78 | 15.38 | 14.77 |
| 1.055 | 0.53        | 1.44 Q0C909  | Ubiquitin-fold modifier-conjugating enzyme 1                                 | Ufc1    | 4966 | 10 | 10 | 10 | 56.9   | 56.9   | 56.9   | 19.481 | 0.0000 | 60.584  | 29344000  | 189     | 15.80 | 15.10  | 16.87 | 17.05 | 16.19 | 16.47 | 16.01 | 15.74 |
| 1.134 | 0.53        | 1.44 Q0J425  | Leucine zipper transcription factor-like protein 1                           | Lzf1    | 3417 | 2  | 2  | 2  | 16.7   | 16.7   | 16.7   | 34.773 | 0.0000 | 12.1    | 1085200   | 19      | 15.40 | 14.99  | 15.38 | 15.38 | 14.99 | 15.38 | 15.38 | 14.99 |
| 1.417 | 0.53        | 1.44 Q0C542  | Ribose-phosphate pyrophosphokinase 2                                         | Pp2p2   | 4697 | 15 | 7  | 7  | 52.8   | 29.2   | 29.2   | 34.786 | 0.0000 | 72.864  | 13058000  | 157     | 15.29 | 15.20  | 15.33 | 15.58 | 14.71 | 15.27 | 14.92 | 14.40 |
| 0.573 | 0.53        | 1.44 Q3JUMW8 | Ceroid-lipofuscinosis neuronal protein 5 homolog                             | Cln5    | 2005 | 4  | 4  | 4  | 7.9    | 7.9    | 7.9    | 39.329 | 0.0018 | 3.1927  | 2972900   | 24      | 14.24 | 14.15  | 15.38 | 14.83 | 13.77 | 13.85 | 13.79 | 15.10 |
| 0.549 | 0.53        | 1.44 Q0D1Y4  | Glutathione-related protein 5, mitochondrial                                 | Gln5    | 2893 | 3  | 3  | 3  | 29.6   | 29.6   | 29.6   | 16.292 | 0.0000 | 9.865   | 4464700   | 52      | 14.92 | 15.94  | 14.73 | 14.97 | 13.68 | 14.60 | 14.77 | 15.40 |
| 1.511 | 0.53        | 1.44 Q0Z603  | Sodium/potassium/calcium exchanger 6, mitochondrial                          | Sbcn1   | 5111 | 1  | 1  | 1  | 64.364 | 64.364 | 64.364 | 38.433 | 0.0000 | 31      | 64.364    | 1391000 | 30    | 13.40  | 13.90 | 13.40 | 13.90 | 13.40 | 13.90 | 13.40 |
| 1.523 | 0.53        | 1.44 Q0B820  | Leucine-rich repeat protein SHOC-2                                           | Shoc2   | 538  | 7  | 7  | 7  | 18.9   | 18.9   | 18.9   | 64.892 | 0.0000 | 38.68   | 9360500   | 124     | 15.51 | 15.55  | 15.57 | 15.77 | 14.92 | 15.57 | 15.05 | 14.76 |
| 3.426 | 0.53        | 1.44 Q0Z252  | Aspartate--RNA ligase, cytoplasmic                                           | Dars    | 2447 | 41 | 41 | 41 | 78.6   | 78.6   | 78.6   | 57.147 | 0.0000 | 323.31  | 189520000 | 1104    | 18.36 | 18.25  | 18.51 | 18.30 | 17.93 | 17.71 | 17.88 | 17.80 |
| 1.451 | 0.53        | 1.44 Q01YV3  | Insulin-like growth factor 2 member 3                                        | Igf2    | 4182 | 27 | 27 | 27 | 47     | 47     | 47     | 17.403 | 0.0000 | 12.1    | 4982600   | 304     | 16.32 | 16.12  | 16.32 | 16.32 | 16.12 | 16.32 | 16.32 | 16.12 |
| 2.364 | 0.53        | 1.44 Q3TH56  | 9S-adenosylmethionine synthase isoform type-2                                | Mat2a   | 1847 | 19 | 19 | 19 | 43.3   | 43.3   | 43.3   | 43.688 | 0.0000 | 107.16  | 69173000  | 374     | 17.25 | 17.14  | 17.61 | 17.32 | 16.68 | 16.97 | 16.81 | 16.76 |
| 0.903 | 0.53        | 1.44 Q0D110  | 5-formyltetrahydrofolate cyclohydrolase                                      | Mfhfs   | 4822 | 8  | 8  | 8  | 38.9   | 38.9   | 38.9   | 23.201 | 0.0000 | 21.48   | 7921900   | 87      | 14.60 | 14.12  | 14.67 | 14.49 | 14.24 | 14.62 | 13.84 | 13.49 |
| 3.135 | 0.53        | 1.44 Q0D1C9  | Multifunctional protein ADE2-Phosphoribosyl-aminimidazole-succinocarboxamide | Adc2    | 5921 | 32 | 32 | 32 | 70.8   | 70.8   | 70.8   | 47.006 | 0.0000 | 206.46  | 153360000 | 762     | 18.47 | 18.21  | 18.15 | 18.41 | 17.87 | 17.85 | 17.73 | 17.75 |
| 1.744 | 0.53        | 1.44 Q0T325  | Phospholipid hydroperoxide glutathione peroxidase, mitochondrial             | Gpx4    | 4244 | 14 | 14 | 14 | 62.4   | 62.4   | 62.4   | 11.255 | 0.0000 | 8897200 | 15        | 15.17   | 15.17 | 15.17  | 15.17 | 15.17 | 15.17 | 15.17 | 15.17 |       |
| 1.596 | 0.53        | 1.44 Q0W1T1  | Transient receptor potential channel family subunit Y member 2               | Trpv2   | 5684 | 22 | 22 |    |        |        |        |        |        |         |           |         |       |        |       |       |       |       |       |       |























|       |      |             |                                                             |               |      |    |    |    |        |        |        |        |        |        |          |          |       |       |       |       |       |       |       |       |       |       |
|-------|------|-------------|-------------------------------------------------------------|---------------|------|----|----|----|--------|--------|--------|--------|--------|--------|----------|----------|-------|-------|-------|-------|-------|-------|-------|-------|-------|-------|
| 0.066 | 0.03 | 1.02 Q9JKB1 | UPF0160 protein MYG1, mitochondrial                         | Mylg1         | 5455 | 14 | 14 | 14 | 46.1   | 46.1   | 46.1   | 42.722 | 0.0000 | 80.81  | 66371000 | 286      | 17.25 | 17.27 | 17.79 | 17.40 | 17.23 | 17.69 | 17.43 | 17.25 |       |       |
| 0.044 | 0.03 | 1.02 Q3T4D7 | POD and LIM domain protein                                  | Podlim7       | 1843 | 1  | 1  | 7  | 23.4   | 23.4   | 23.4   | 20.4   | 50.118 | 0.0000 | 22.286   | 3986500  | 70    | 14.98 | 14.26 | 14.71 | 14.71 | 14.03 | 14.23 | 14.73 | 14.49 | 14.41 |
| 0.068 | 0.03 | 1.02 Q8C1QC | Small integral membrane protein 4                           | Smim4         | 3366 | 1  | 1  | 1  | 15     | 15     | 15     | 15     | 9.7453 | 0.0018 | 3.1433   | 1259000  | 27    | 13.29 | 13.45 | 13.45 | 13.40 | 13.40 | 13.34 | 13.05 | 13.57 |       |
| 0.070 | 0.03 | 1.02 Q9V1R8 | Protein BRIC1                                               | Protein BRIC1 | 4038 | 10 | 10 | 10 | 10     | 10     | 10     | 34     | 76321  | 0.0000 | 37       | 76321    | 0     | 16.62 | 17.50 | 17.17 | 17.37 | 16.62 | 17.50 | 16.62 | 17.50 |       |
| 0.070 | 0.03 | 1.02 Q9C2D8 | Mitochondrial dicarboxylate carrier                         | Slc25a10      | 4595 | 17 | 17 | 17 | 58.9   | 58.9   | 58.9   | 31.715 | 0.0000 | 116.3  | 3757800  | 179      | 16.88 | 16.72 | 16.89 | 16.67 | 17.16 | 16.67 | 16.57 | 16.65 |       |       |
| 0.040 | 0.03 | 1.02 Q3J0UP | Wip repeat-containing protein 41                            | Wdr41         | 1949 | 12 | 12 | 12 | 38.3   | 38.3   | 38.3   | 38.3   | 91.51  | 0.0000 | 38.701   | 12193000 | 112   | 14.61 | 15.45 | 15.44 | 15.58 | 15.23 | 15.28 | 15.47 | 15.19 |       |
| 0.070 | 0.03 | 1.02 Q8D818 | Phosphoglycerate mutase 1                                   | Pgam1         | 5158 | 6  | 6  | 6  | 18.8   | 18.8   | 18.8   | 28.537 | 0.0000 | 329.3  | 22070000 | 24       | 22.54 | 22.18 | 22.44 | 22.24 | 22.34 | 22.44 | 22.34 | 22.44 |       |       |
| 0.051 | 0.03 | 1.02 Q5C4Z5 | Bystin                                                      | Bysl          | 426  | 6  | 6  | 6  | 18.8   | 18.8   | 18.8   | 49.81  | 0.0000 | 25.028 | 4250000  | 93       | 14.51 | 14.34 | 14.88 | 14.79 | 14.24 | 14.61 | 14.96 | 14.60 |       |       |
| 0.016 | 0.03 | 1.02 Q5F285 | Transmembrane protein 256                                   | Tmem256       | 2102 | 3  | 3  | 3  | 37.2   | 37.2   | 37.2   | 11.655 | 0.0000 | 6.4037 | 1375800  | 11       | 13.07 | 14.03 | 14.30 | 12.49 | 12.65 | 12.81 | 14.09 | 14.04 |       |       |
| 0.016 | 0.03 | 1.02 P571R4 | U2 small nuclear ribonucleoprotein A                        | U2A           | 75   | 17 | 17 | 17 | 75.7   | 75.7   | 75.7   | 16.357 | 0.0000 | 32.3   | 31691000 | 26       | 16.63 | 16.81 | 16.81 | 16.81 | 16.81 | 16.81 | 16.81 | 16.81 |       |       |
| 0.062 | 0.03 | 1.02 Q3UFR8 | FERM domain-containing protein 8                            | Frm8          | 1955 | 17 | 17 | 17 | 49.4   | 49.4   | 49.4   | 51.827 | 0.0000 | 220.42 | 52414000 | 383      | 17.59 | 17.90 | 17.80 | 17.80 | 17.52 | 17.66 | 17.79 | 18.12 | 17.92 |       |
| 0.015 | 0.03 | 1.02 Q8R0F3 | Sulfatase-modifying factor 3                                | Sumf1         | 3755 | 3  | 3  | 3  | 12.6   | 12.6   | 12.6   | 12.6   | 40.599 | 0.0000 | 8.15     | 4762200  | 36    | 13.48 | 15.91 | 15.44 | 15.19 | 14.99 | 14.39 | 15.13 | 15.40 |       |
| 0.015 | 0.03 | 1.02 P268D2 | Adenylosuccinate synthetase isozyme 1                       | Adsls1        | 4510 | 6  | 6  | 6  | 50.254 | 50.254 | 50.254 | 50.254 | 23.82  | 0.0000 | 12576000 | 62       | 15.01 | 17.62 | 17.62 | 17.62 | 17.62 | 17.62 | 17.62 | 17.62 |       |       |
| 0.094 | 0.02 | 1.02 Q3U3E1 | Uncharacterized protein KIAA0503 homolog                    |               | 1952 | 12 | 12 | 12 | 39.4   | 39.4   | 39.4   | 39.4   | 45.96  | 0.0000 | 49.351   | 16963000 | 149   | 15.45 | 15.50 | 15.70 | 15.28 | 15.41 | 15.42 | 15.59 | 15.40 |       |
| 0.024 | 0.02 | 1.02 Q8BMC4 | Nuclear protein 9                                           | Nop9          | 3133 | 12 | 12 | 12 | 23.3   | 23.3   | 23.3   | 23.3   | 70.046 | 0.0000 | 49.828   | 12870000 | 105   | 15.00 | 15.36 | 15.29 | 15.33 | 14.70 | 14.79 | 15.66 | 16.13 |       |
| 0.024 | 0.02 | 1.02 Q7R8E5 | F-box only protein 22                                       | Fbxo22        | 2725 | 6  | 6  | 6  | 18.9   | 18.9   | 18.9   | 44.202 | 0.0000 | 95.559 | 8552700  | 118      | 14.86 | 14.80 | 15.41 | 15.17 | 14.78 | 14.34 | 15.33 | 15.70 |       |       |
| 0.024 | 0.02 | 1.02 Q9W1R5 | Band3-type and C8orf4-type zinc finger-containing protein 1 | Rbck1         | 5705 | 5  | 5  | 5  |        |        |        |        |        |        |          |          |       |       |       |       |       |       |       |       |       |       |



























|       |       |      |           |                                                                            |                  |      |    |    |    |      |      |      |        |        |        |           |     |       |       |       |       |       |       |       |       |
|-------|-------|------|-----------|----------------------------------------------------------------------------|------------------|------|----|----|----|------|------|------|--------|--------|--------|-----------|-----|-------|-------|-------|-------|-------|-------|-------|-------|
| 2.231 | -2.06 | 0.24 | Q9DB42    | Zinc finger protein 593                                                    | Znf593           | 5126 | 5  | 5  | 5  | 41   | 41   | 41   | 15.147 | 0.0000 | 23.496 | 7338400   | 70  | 13.83 | 13.36 | 13.34 | 14.56 | 14.93 | 16.39 | 15.37 | 16.61 |
| 1.929 | -2.10 | 0.23 | Q8VD19    | 39S ribosomal protein L50, mitochondrial                                   | Mrp50            | 3972 | 3  | 3  | 3  | 27   | 27   | 27   | 18.213 | 0.0000 | 12.972 | 6894500   | 80  | 13.49 | 14.33 | 12.84 | 12.38 | 14.50 | 15.38 | 15.12 | 16.46 |
| 2.897 | -2.12 | 0.23 | Q9CPJ9    | Probable low affinity copper uptake protein 2                              | Slc31a2          | 4537 | 1  | 1  | 1  | 17.5 | 17.5 | 17.5 | 16.069 | 0.0000 | 54.272 | 8638300   | 86  | 12.78 | 13.33 | 13.25 | 14.43 | 15.78 | 15.75 | 15.52 | 15.22 |
| 1.837 | -2.13 | 0.23 | Q9CQJ7    | 39S ribosomal protein L41, mitochondrial                                   | Mrp41            | 4617 | 8  | 8  | 8  | 60.7 | 60.7 | 60.7 | 15.261 | 0.0000 | 11.867 | 13994000  | 102 | 12.81 | 15.26 | 13.32 | 13.89 | 15.62 | 16.04 | 15.50 | 17.14 |
| 0.760 | -2.13 | 0.23 | Q82803    |                                                                            |                  | 518  | 16 | 16 | 16 | 91.2 | 91.2 | 91.2 | 22.344 | 0.0000 | 238.41 | 41075000  | 123 | 11.60 | 14.20 | 10.90 | 11.82 | 12.61 | 12.30 | 14.71 | 17.43 |
| 3.528 | -2.18 | 0.22 | Q8C1D8    | Protein IWS1 homolog                                                       | Iws1             | 3364 | 6  | 6  | 6  | 9.5  | 9.5  | 9.5  | 85.247 | 0.0000 | 37.891 | 4307300   | 78  | 12.75 | 13.03 | 13.12 | 12.44 | 14.54 | 15.68 | 14.77 | 15.07 |
| 1.511 | -2.18 | 0.22 | Q8B550    | Histone-lysine N-methyltransferase 2B                                      | Kmt2b            | 271  | 14 | 14 | 14 | 7.5  | 7.5  | 7.5  | 294.82 | 0.0000 | 71.898 | 13973000  | 74  | 13.60 | 14.57 | 14.96 | 15.36 | 16.83 | 18.08 | 14.91 | 17.40 |
| 2.518 | -2.19 | 0.22 | Q8BZ99    | Uncharacterized protein C17orf85 homolog                                   |                  | 3318 | 12 | 12 | 12 | 19.7 | 19.7 | 19.7 | 70.042 | 0.0000 | 37.218 | 9230000   | 92  | 13.18 | 14.33 | 13.43 | 13.04 | 14.97 | 15.98 | 15.26 | 16.53 |
| 1.570 | -2.20 | 0.22 | Q91Z49    | UAP56-interacting factor                                                   | Fyttd1           | 4186 | 15 | 15 | 15 | 41   | 41   | 41   | 35.887 | 0.0000 | 119.67 | 28629000  | 182 | 14.85 | 14.92 | 13.14 | 14.86 | 15.16 | 17.60 | 16.08 | 17.71 |
| 0.927 | -2.20 | 0.22 | P01887    | Beta-2-microglobulin                                                       | B2m              | 619  | 3  | 3  | 3  | 22.7 | 22.7 | 22.7 | 13.779 | 0.0004 | 4.5623 | 11159000  | 52  | 15.59 | 14.03 | 12.50 | 15.89 | 17.56 | 18.36 | 16.73 | 14.10 |
| 1.863 | -2.20 | 0.22 | Q8D5D3    | Centrosomal protein of 83 kDa                                              | Cep83            | 4984 | 1  | 1  | 1  | 1.4  | 1.4  | 1.4  | 81.997 | 0.0095 | 1.8178 | 22804000  | 78  | 13.13 | 16.05 | 15.72 | 15.73 | 16.96 | 16.99 | 17.63 | 17.85 |
| 2.792 | -2.22 | 0.22 | Q9J9H1    | Ribonuclease P protein subunit p25-like protein                            | Rpp25l           | 4339 | 6  | 6  | 6  | 46   | 46   | 46   | 17.675 | 0.0000 | 59.082 | 15898000  | 137 | 13.52 | 15.08 | 14.86 | 15.12 | 16.69 | 17.18 | 16.53 | 17.04 |
| 3.121 | -2.23 | 0.21 | P47964    | 60S ribosomal protein L36                                                  | Rpl36            | 1136 | 10 | 10 | 10 | 40   | 40   | 40   | 12.215 | 0.0000 | 37.347 | 520770000 | 803 | 18.39 | 19.13 | 18.05 | 18.55 | 20.30 | 21.44 | 20.33 | 20.97 |
| 2.047 | -2.24 | 0.21 | Q9CKZ1    | NADH dehydrogenase [ubiquinone] iron-sulfur protein 4, mitochondrial       | Ndufs4           | 4776 | 8  | 8  | 8  | 53.1 | 53.1 | 53.1 | 18.784 | 0.0000 | 20.09  | 4511800   | 35  | 11.26 | 13.43 | 12.60 | 13.27 | 15.02 | 15.18 | 13.84 | 15.39 |
| 1.440 | -2.25 | 0.21 | Q9WYF8    | Tumor suppressor candidate 2                                               | Tusc2            | 5747 | 2  | 2  | 2  | 33.6 | 33.6 | 33.6 | 12.136 | 0.0011 | 3.598  | 7400900   | 21  | 13.88 | 15.91 | 12.88 | 16.27 | 17.30 | 16.54 | 16.74 | 17.36 |
| 2.685 | -2.25 | 0.21 | Q8K003    | Translation machinery-associated protein 7                                 | Tma7             | 3590 | 7  | 6  | 6  | 53.1 | 40.6 | 40.6 | 7.0662 | 0.0000 | 11.939 | 25853000  | 94  | 14.26 | 14.88 | 14.11 | 15.09 | 16.39 | 17.14 | 16.10 | 17.71 |
| 1.434 | -2.25 | 0.21 | P58468    | Protein FAM207A                                                            | Fam207a          | 1317 | 9  | 9  | 9  | 47   | 47   | 47   | 24.814 | 0.0000 | 20.39  | 12197000  | 76  | 13.92 | 12.29 | 11.76 | 15.29 | 15.56 | 15.12 | 15.30 | 16.29 |
| 2.069 | -2.27 | 0.21 | Q8CQPD    | Histone H2B type 3-B-Histone H2B type 3-A                                  | HistH2bb-HistH3b | 3510 | 18 | 2  | 0  | 79.4 | 7.9  | 0    | 13.908 | 0.0025 | 2.9292 | 3927700   | 23  | 13.93 | 12.79 | 12.22 | 12.19 | 14.99 | 15.00 | 14.06 | 16.15 |
| 2.471 | -2.37 | 0.19 | Q91X96    | Guanine nucleotide exchange factor MSS4                                    | Rabif            | 4138 | 3  | 3  | 3  | 28.5 | 28.5 | 28.5 | 13.915 | 0.0000 | 9.2748 | 49707000  | 46  | 13.22 | 13.07 | 14.84 | 13.64 | 15.75 | 16.57 | 15.34 | 16.58 |
| 1.142 | -2.40 | 0.19 | AAASKRLP0 |                                                                            |                  | 1    | 2  | 2  | 2  | 3.9  | 3.9  | 3.9  | 65.089 | 0.0090 | 1.8647 | 14007000  | 14  | 13.91 | 13.31 | 13.25 | 14.74 | 17.90 | 13.15 | 16.74 | 17.03 |
| 3.851 | -2.48 | 0.18 | Q9JUM1    | Endothelial differentiation-related factor 1                               | Edrf             | 5509 | 10 | 10 | 10 | 68.9 | 68.9 | 68.9 | 16.399 | 0.0000 | 71.628 | 13406000  | 109 | 13.94 | 13.46 | 14.13 | 13.79 | 15.74 | 16.36 | 16.17 | 16.97 |
| 2.102 | -2.49 | 0.18 | P97350    | Plakophilin-1                                                              | Pkp1             | 1626 | 17 | 17 | 17 | 27.2 | 27.2 | 27.2 | 80.895 | 0.0000 | 52.979 | 24980000  | 73  | 14.37 | 15.69 | 13.17 | 14.53 | 15.87 | 16.94 | 17.43 | 17.48 |
| 2.361 | -2.50 | 0.18 | Q9D1R9    | 60S ribosomal protein L34                                                  | Rpl34            | 4936 | 11 | 11 | 11 | 52.1 | 52.1 | 52.1 | 13.293 | 0.0000 | 40.795 | 404730000 | 550 | 18.54 | 18.75 | 16.74 | 17.72 | 20.26 | 21.05 | 19.59 | 20.85 |
| 2.639 | -2.50 | 0.18 | Q9D773    | 39S ribosomal protein L2, mitochondrial                                    | Mrp2             | 5021 | 12 | 12 | 12 | 43.8 | 43.8 | 43.8 | 33.34  | 0.0000 | 176    | 30239000  | 186 | 14.06 | 15.15 | 14.27 | 14.82 | 15.98 | 17.62 | 16.85 | 17.87 |
| 2.210 | -2.54 | 0.17 | P61166    | Transmembrane protein 258                                                  | Tmem258          | 1374 | 2  | 2  | 2  | 10.1 | 10.1 | 10.1 | 9.0788 | 0.0009 | 3.658  | 3167000   | 28  | 13.56 | 13.08 | 13.87 | 11.86 | 16.07 | 16.14 | 14.36 | 15.97 |
| 2.238 | -2.56 | 0.17 | P61804    | Dolichyl-diphosphooligosaccharide-protein glycosyltransferase subunit Dad1 | Dad1             | 1390 | 2  | 2  | 2  | 19.5 | 19.5 | 19.5 | 12.497 | 0.0002 | 6.0643 | 7126900   | 46  | 14.46 | 12.95 | 13.50 | 13.27 | 16.70 | 15.96 | 14.71 | 17.05 |
| 2.578 | -2.60 | 0.16 | P0C014    | Chromosome transmission fidelity protein 8 homolog isoform 2               | Cht8             | 709  | 12 | 12 | 12 | 36.2 | 36.2 | 36.2 | 52.244 | 0.0000 | 51.981 | 16896000  | 107 | 14.21 | 15.02 | 13.37 | 12.86 | 16.34 | 17.09 | 15.97 | 16.49 |
| 1.561 | -2.67 | 0.16 | Q8CJ70    | Leucine-rich repeat-containing protein 20                                  | Lnc20            | 3542 | 5  | 5  | 5  | 39.7 | 39.7 | 39.7 | 20.809 | 0.0000 | 219.94 | 16598000  | 76  | 13.90 | 16.17 | 16.76 | 12.99 | 17.15 | 18.03 | 17.45 | 17.88 |
| 1.356 | -2.73 | 0.15 | Q8K4K2    | Tribbles homolog 3                                                         | Trb3             | 3719 | 1  | 1  | 1  | 4.2  | 4.2  | 4.2  | 39.022 | 0.0027 | 2.7002 | 5545500   | 36  | 13.88 | 13.36 | 13.99 | 11.80 | 14.23 | 18.18 | 14.58 | 16.96 |
| 2.189 | -2.76 | 0.15 | Q64475    | Histone H2B type 1-B                                                       | HistH2bb         | 2447 | 25 | 1  | 1  | 92.1 | 8.7  | 8.7  | 13.952 | 0.0058 | 2.1731 | 6676700   | 14  | 12.01 | 13.95 | 13.45 | 15.26 | 16.62 | 16.40 | 16.43 | 16.27 |
| 2.627 | -2.82 | 0.14 | P62858    | 40S ribosomal protein S28                                                  | Rps28            | 1456 | 9  | 9  | 9  | 72.5 | 72.5 | 72.5 | 7.8409 | 0.0000 | 71.422 | 49709000  | 237 | 14.11 | 16.20 | 15.35 | 14.75 | 17.44 | 17.83 | 17.50 | 16.91 |
| 2.706 | -2.88 | 0.14 | Q8K1I7    | WAS/WASL-interacting protein family member 1                               | Wipf1            | 3628 | 10 | 10 | 10 | 24.9 | 24.9 | 24.9 | 50.08  | 0.0000 | 21.263 | 31171000  | 123 | 14.50 | 15.88 | 15.24 | 13.83 | 17.24 | 18.05 | 17.17 | 18.52 |
| 2.613 | -2.92 | 0.13 | Q9CQY6    | Ubiquinol-cytochrome-c reductase complex assembly factor 2                 | Uqc2c            | 4649 | 3  | 3  | 3  | 27.9 | 27.9 | 27.9 | 16.32  | 0.0000 | 15.97  | 7918300   | 63  | 13.85 | 12.56 | 12.56 | 14.84 | 16.12 | 16.42 | 16.09 | 16.88 |
| 2.944 | -3.13 | 0.11 | P62862    | 40S ribosomal protein S30                                                  | Fau              | 1457 | 4  | 4  | 4  | 33.9 | 33.9 | 33.9 | 6.8478 | 0.0002 | 5.6604 | 10265000  | 102 | 15.77 | 18.05 | 16.93 | 16.66 | 19.31 | 20.51 | 19.82 | 20.27 |
| 2.482 | -3.15 | 0.11 | Q9CR61    | NADH dehydrogenase [ubiquinone] 1 beta subcomplex subunit 7                | Ndufb7           | 4673 | 4  | 4  | 4  | 45.3 | 45.3 | 45.3 | 16.331 | 0.0000 | 36.778 | 10829000  | 56  | 15.54 | 13.14 | 12.98 | 13.56 | 16.41 | 17.25 | 16.46 | 17.69 |
| 2.775 | -3.17 | 0.11 | P0DN34    |                                                                            |                  | 713  | 4  | 4  | 4  | 49.1 | 49.1 | 49.1 | 6.954  | 0.0000 | 7.0288 | 30373000  | 97  | 13.92 | 15.75 | 16.37 | 16.16 | 18.77 | 19.13 | 18.24 | 18.72 |
| 1.304 | -3.18 | 0.11 | P15252    |                                                                            |                  | 792  | 13 | 13 | 13 | 87   | 87   | 87   | 14.722 | 0.0000 | 104.74 | 19718000  | 60  | 9.13  | 11.49 | 10.67 | 10.27 | 13.55 | 12.04 | 11.72 | 16.96 |
| 2.184 | -3.25 | 0.11 | P62760    | Ribonuclease UK114                                                         | Hrnp12           | 1223 | 7  | 7  | 7  | 52.6 | 52.6 | 52.6 | 14.255 | 0.0000 | 23.684 | 16919000  | 89  | 12.30 | 15.34 | 14.77 | 13.45 | 16.32 | 17.59 | 16.77 | 18.18 |
| 1.831 | -3.77 | 0.07 | Q8BK35    |                                                                            | Gltcr2           | 3093 | 18 | 18 | 18 | 43   | 43   | 43   | 55.792 | 0.0000 | 72.209 | 15067000  | 180 | 12.41 | 14.49 | 10.61 | 12.79 | 16.35 | 17.69 | 14.17 | 17.17 |





































|       |        |      |         |                                                                         |         |      |    |    |    |        |        |        |        |        |           |           |       |       |       |       |       |       |       |       |       |
|-------|--------|------|---------|-------------------------------------------------------------------------|---------|------|----|----|----|--------|--------|--------|--------|--------|-----------|-----------|-------|-------|-------|-------|-------|-------|-------|-------|-------|
| 0.676 | 0.31   | 1.24 | 088712  | C-terminal-binding protein 1                                            | Ctbp1   | 562  | 17 | 17 | 11 | 42     | 42     | 34.5   | 47.744 | 0.0000 | 119.89    | 42133000  | 312   | 16.73 | 16.62 | 17.46 | 17.00 | 16.39 | 16.93 | 16.64 | 16.70 |
| 0.323 | 0.01   | 1.24 | 054833  | Cas6in kinase 1 subunit alpha                                           | Csnk2a2 | 428  | 23 | 23 | 23 | 64.3   | 64.3   | 64.3   | 41.215 | 0.0000 | 225.34    | 44869000  | 393   | 16.67 | 16.40 | 17.05 | 16.59 | 16.92 | 16.89 | 16.35 | 15.30 |
| 0.901 | 0.31   | 1.24 | 088010  | Aminoacyl tRNA synthetase complex-interacting multifunctional protein 2 | Amp2    | 3742 | 11 | 11 | 11 | 54.1   | 54.1   | 54.1   | 35.377 | 0.0000 | 323.31    | 43628000  | 272   | 17.66 | 17.20 | 17.24 | 17.65 | 16.98 | 17.07 | 17.49 | 16.96 |
| 0.431 | 0.01   | 1.24 | 048038  | Annexin A5                                                              | Anxa5   | 1140 | 24 | 24 | 24 | 140.6  | 140.6  | 140.6  | 21.752 | 0.0000 | 323.31    | 421070000 | 2619  | 21.57 | 21.61 | 21.84 | 20.98 | 21.57 | 21.60 | 21.56 | 21.81 |
| 0.048 | 0.31   | 1.24 | 08C0E6  | Coatomer subunit alpha,Xenin,Proxenin                                   | Copa    | 3550 | 73 | 73 | 73 | 61.8   | 61.8   | 61.8   | 138.43 | 0.0000 | 323.31    | 412070000 | 1819  | 19.02 | 18.73 | 20.03 | 19.11 | 18.91 | 18.96 | 17.98 | 18.81 |
| 1.146 | 0.31   | 1.24 | 040655  | Hydroxanthine-guanine phosphoribosyltransferase                         | Hprt1   | 612  | 20 | 20 | 20 | 71.1   | 71.1   | 71.1   | 24.57  | 0.0000 | 162.82    | 97595000  | 719   | 18.20 | 18.22 | 18.60 | 18.09 | 17.92 | 18.03 | 17.96 | 17.97 |
| 1.400 | 0.31   | 1.24 | P35565  | AP-1 complex subunit mu-1                                               | Ap1m1   | 1027 | 21 | 21 | 21 | 55.1   | 55.1   | 55.1   | 48.542 | 0.0000 | 162.81    | 17153000  | 140   | 17.06 | 17.03 | 17.24 | 16.91 | 16.81 | 16.58 | 17.06 | 16.53 |
| 0.021 | 0.31   | 1.24 | 040VC2  | Ado-keto reductase family 1 member C13                                  | Akr1c13 | 3006 | 24 | 24 | 24 | 100.7  | 100.7  | 100.7  | 26.798 | 0.0000 | 66.76     | 17400000  | 399   | 17.01 | 17.16 | 17.16 | 16.99 | 17.17 | 16.97 | 17.16 | 16.88 |
| 0.829 | 0.31   | 1.24 | 029157  | 39S ribosomal protein L37, mitochondrial                                | Mcp37   | 4239 | 16 | 16 | 16 | 45.9   | 45.9   | 45.9   | 48.34  | 0.0000 | 63.049    | 61018000  | 134   | 15.01 | 14.64 | 15.23 | 15.28 | 14.91 | 14.58 | 14.94 | 14.49 |
| 1.062 | 0.31   | 1.24 | P80314  | T-complex protein 1 subunit beta                                        | Tptd2   | 1591 | 62 | 62 | 62 | 91     | 91     | 91     | 57.477 | 0.0000 | 323.31    | 655340000 | 2289  | 19.60 | 19.36 | 20.03 | 19.69 | 19.21 | 19.47 | 19.39 | 19.49 |
| 0.319 | 0.01   | 1.24 | 08Q0D5  | Elongation factor C, mitochondrial                                      | Efc3    | 354  | 6  | 6  | 6  | 63.549 | 63.549 | 63.549 | 87.59  | 0.0000 | 263.22000 | 153       | 16.35 | 16.47 | 16.58 | 16.33 | 16.25 | 16.37 | 16.50 | 16.25 |       |
| 0.225 | 0.31   | 1.24 | 08C0D2  | Tetrapeptide repeat protein 27                                          | Tlcp27  | 3457 | 6  | 6  | 6  | 9.9    | 9.9    | 9.9    | 96.43  | 0.0000 | 21.171    | 1991200   | 15    | 13.04 | 13.59 | 15.17 | 14.52 | 14.14 | 13.80 | 14.50 | 13.06 |
| 1.425 | 0.31   | 1.24 | 08C230  | Osteo-like ATPase 1                                                     | Ola1    | 4816 | 21 | 21 | 21 | 5.6    | 5.6    | 5.6    | 4.729  | 0.0000 | 215.42    | 76849000  | 459   | 17.55 | 17.59 | 18.01 | 17.66 | 17.36 | 17.40 | 17.52 | 17.30 |
| 0.991 | 0.31   | 1.24 | 08JWAU3 | ATP-dependent 6-phosphogluconate, platelet type                         | P6p     | 5703 | 45 | 45 | 45 | 58.3   | 58.3   | 58.3   | 85.454 | 0.0000 | 323.31    | 27389000  | 1425  | 18.89 | 18.89 | 18.61 | 19.24 | 18.53 | 18.63 | 18.85 | 18.41 |
| 1.173 | 0.31   | 1.24 | P68A04  | Protein kinase C delta type                                             | Pkcdb   | 1520 | 24 | 24 | 24 | 42.5   | 42.5   | 42.5   | 70.75  | 0.0000 | 66.76     | 17400000  | 399   | 17.01 | 17.16 | 17.16 | 16.99 | 17.17 | 16.97 | 17.16 | 16.88 |
| 0.967 | 0.31   | 1.23 | P161087 | Ubltin-conjugating enzyme E2 K                                          | Ube2k   | 1370 | 17 | 17 | 17 | 79.5   | 79.5   | 79.5   | 22.406 | 0.0000 | 93.675    | 3018000   | 383   | 16.65 | 16.38 | 16.92 | 17.68 | 16.39 | 16.44 | 16.08 | 16.62 |
| 0.251 | 0.31</ |      |         |                                                                         |         |      |    |    |    |        |        |        |        |        |           |           |       |       |       |       |       |       |       |       |       |











|       |      |             |                                                                           |         |      |    |    |    |      |      |      |        |        |          |            |           |       |       |       |       |       |       |       |       |
|-------|------|-------------|---------------------------------------------------------------------------|---------|------|----|----|----|------|------|------|--------|--------|----------|------------|-----------|-------|-------|-------|-------|-------|-------|-------|-------|
| 0.100 | 0.06 | 1.04 Q6P181 | Xaa-Pro aminopeptidase 1                                                  | Xpmp1   | 2552 | 30 | 30 | 30 | 64.5 | 64.5 | 64.5 | 69.59  | 0.0000 | 242.41   | 102480000  | 517       | 17.36 | 17.59 | 18.10 | 17.75 | 17.54 | 17.80 | 17.98 | 17.24 |
| 0.145 | 0.06 | 1.04 P57080 | Ubiquitin carboxyl-terminal hydrolase 25                                  | Usp25   | 1295 | 13 | 13 | 13 | 14.3 | 14.3 | 14.3 | 14.3   | 0.0000 | 64.067   | 12193000   | 188       | 15.07 | 15.14 | 15.14 | 15.32 | 14.72 | 15.18 | 15.07 | 15.45 |
| 0.049 | 0.06 | 1.04 P58501 | PAX3- and PAX7-binding protein 1                                          | Paxbp1  | 1318 | 5  | 5  | 5  | 8.8  | 8.8  | 8.8  | 104.83 | 0.0000 | 30.922   | 2410600    | 22        | 14.39 | 13.89 | 13.93 | 13.65 | 12.78 | 14.66 | 14.19 | 13.99 |
| 0.096 | 0.06 | 1.04 Q9RLU0 | Charged multivesicular body protein 1b-1                                  | Chmp1b1 | 4447 | 6  | 6  | 6  | 20.6 | 20.6 | 20.6 | 5      | 22.124 | 0.0000   | 15.094     | 22317000  | 100   | 16.80 | 16.78 | 17.43 | 16.40 | 16.91 | 16.63 | 16.68 |
| 0.181 | 0.06 | 1.04 Q8BHE5 | Enoyl-CoA hydratase, mitochondrial                                        | Ech1    | 3024 | 18 | 18 | 18 | 62.8 | 62.8 | 62.8 | 31     | 47.4   | 0.0000   | 323.31     | 209100000 | 804   | 18.17 | 18.14 | 18.27 | 18.01 | 17.72 | 18.27 | 18.01 |
| 0.046 | 0.06 | 1.04 Q9B993 | Csa anaphylatoxin chemotactic receptor 1                                  | Csar1   | 981  | 4  | 4  | 4  | 7.4  | 7.4  | 7.4  | 39.023 | 0.0000 | 83.799   | 33417000   | 133       | 16.53 | 15.90 | 19.77 | 10.75 | 16.72 | 16.59 | 17.03 |       |
| 0.075 | 0.06 | 1.04 Q8CDQ3 | Deubiquitinating protein VCP135                                           | Vcp135  | 3460 | 31 | 31 | 31 | 31.7 | 31.7 | 31.7 | 134.5  | 0.0000 | 180.18   | 47850000   | 438       | 15.99 | 15.68 | 16.84 | 16.28 | 15.91 | 16.43 | 16.33 |       |
| 0.076 | 0.06 | 1.04 Q9CQ22 | Regulator complex protein 1/LAMTOR1                                       | Lamtor1 | 4554 | 11 | 11 | 11 | 76.4 | 76.4 | 76.4 | 17.49  | 0.0000 | 277.03   | 77061000   | 372       | 17.72 | 17.20 | 18.37 | 18.11 | 17.60 | 17.79 | 18.11 |       |
| 0.051 | 0.06 | 1.04 Q91W50 | CysH1 iron-sulfur domain-containing protein 1                             | CysH1   | 4126 | 6  | 6  | 6  | 42.6 | 42.6 | 42.6 | 12     | 0.0000 | 67.501   | 20745000   | 122       | 16.03 | 15.91 | 16.20 | 16.03 | 15.91 | 16.03 | 16.03 |       |
| 0.138 | 0.06 | 1.04 P18653 | Ribosomal protein S6 kinase alpha-1                                       | Rpsk1a  | 839  | 37 | 37 | 37 | 52.9 | 52.9 | 52.9 | 81.594 | 0.0000 | 234.71   | 91418000   | 731       | 16.71 | 16.73 | 16.66 | 17.22 | 16.62 | 17.04 | 16.72 |       |
| 0.194 | 0.06 | 1.04 Q9CXW4 | 60S ribosomal protein L11                                                 | Rpl11   | 4772 | 17 | 17 | 17 | 61.2 | 61.2 | 61.2 | 20.252 | 0.0000 | 11.414   | 430130000  | 530       | 20.45 | 19.90 | 20.29 | 20.21 | 20.22 | 20.15 | 20.21 |       |
| 0.183 | 0.06 | 1.04 Q9DDK2 | Succinyl-CoA:3-ketoadic coenzyme A transferase 1, mitochondrial           | Oxo1t   | 4873 | 30 | 30 | 30 | 68.1 | 68.1 | 68.1 | 55.988 | 0.0000 | 323.31   | 420750000  | 1276      | 18.88 | 18.59 | 19.94 | 18.54 | 18.73 | 18.82 | 18.69 |       |
| 0.051 | 0.06 | 1.04 Q9PDL3 | Cytoplasmic domain 1 light intermediate chain 2                           | Dync1l2 | 2618 | 16 | 16 | 16 | 50.8 | 50.8 | 50.8 | 54.218 | 0.0000 | 180.58   | 19133000   | 289       | 16.48 | 16.41 | 16.48 | 16.51 | 16.48 | 16.51 | 16.48 |       |
| 0.028 | 0.06 | 1.04 Q8QUS7 | Interferon-induced very large GTPase 1                                    | Gvn1    | 2794 | 86 | 86 | 86 | 41.3 | 41.3 | 41.3 | 29.801 | 0.0000 | 323.31   | 94693000   | 875       | 15.44 | 14.72 | 17.11 | 16.59 | 15.55 | 16.28 | 16.91 |       |
| 0.138 | 0.06 | 1.04 Q88447 | Kinesin light chain 1                                                     | Klc1    | 530  | 30 | 30 | 30 | 24   | 24   | 24   | 46.2   | 0.0000 | 135.45   | 36882000   | 405       | 15.99 | 15.91 | 16.40 | 15.92 | 15.75 | 15.98 | 16.01 |       |
| 0.031 | 0.06 | 1.04 Q91B02 | Transmembrane anterior posterior transformation protein 1                 | Tap1    | 2070 | 4  | 4  | 4  | 10.8 | 10.8 | 10.8 | 63.893 | 0.0002 | 6.1564   | 1539400    | 6         | 13.39 | 13.14 | 13.93 | 13.44 | 12.61 | 12.90 | 12.92 |       |
| 0.055 | 0.06 | 1.04 Q8ERQ0 | LM domain and actin-binding protein 1                                     | Lma1    | 5309 | 19 | 19 | 19 | 31.1 | 31.1 | 31.1 | 28.6   | 84.059 | 0.0000   | 44.918     | 22487000  | 206   | 16.33 | 16.08 | 17.57 | 16.11 | 16.26 | 16.54 | 16.57 |
| 0.060 | 0.06 | 1.04 Q9GK1  | Myeloid leukemia factor 2                                                 | Mlf2    | 4399 | 4  | 4  | 4  | 23.5 | 23.5 | 23.5 | 28.055 | 0.0000 | 7.1161   | 2014300    | 18        | 14.05 | 13.47 | 14.13 | 13.30 | 13.48 | 14.46 | 13.39 |       |
| 0.079 | 0.06 | 1.04 Q9CPW4 | Actin-related protein 2/3 complex subunit 5                               | Arp5    | 4539 | 12 | 12 | 12 | 11.1 | 11.1 | 11.1 | 16.288 | 0.0000 | 323.31   | 192510000  | 460       | 18.81 | 19.11 | 19.57 | 19.20 | 19.10 | 19.68 | 19.92 |       |
| 0.137 | 0.06 | 1.04 P10107 | Anexin A1                                                                 | Anxa1   | 718  | 62 | 62 | 61 | 93.9 | 93.9 | 93.9 | 38.734 | 0.0000 | 323.31   | 314540000  | 3743      | 22.34 | 22.16 | 22.78 | 22.55 | 22.44 | 22.59 | 22.30 |       |
| 0.270 | 0.06 | 1.04 P01161 | Actin-related protein 2                                                   | Act2    | 1372 | 45 | 45 | 44 | 80.2 | 80.2 | 80.2 | 44.76  | 0.0000 | 323.31   | 727520000  | 1648      | 20.44 | 20.17 | 20.45 | 20.44 | 20.33 | 20.22 | 20.45 |       |
| 0.037 | 0.05 | 1.04 Q7QTH0 | Ataxin-2-like protein                                                     | Atxn2   | 2774 | 12 | 12 | 12 | 17.6 | 17.6 | 17.6 | 110.65 | 0.0000 | 48.943   | 32251000   | 225       | 16.74 | 16.82 | 17.44 | 16.94 | 16.84 | 17.32 | 16.72 |       |
| 0.129 | 0.05 | 1.04 Q912V6 | Stromal membrane-associated protein 1                                     | Smap1   | 4086 | 9  | 8  | 8  | 18.4 | 16.6 | 16.6 | 47.66  | 0.0000 | 48.188   | 11150000   | 181       | 15.06 | 14.67 | 15.10 | 14.80 | 14.57 | 14.73 | 15.06 |       |
| 0.057 | 0.05 | 1.04 Q6Q441 | Spectrin beta chain, non-erythrocytic 1                                   | Sptb1   | 2373 | 83 | 83 | 81 | 43   | 43   | 43   | 21.422 | 0.0000 | 323.31   | 131300000  | 1218      | 16.69 | 16.63 | 17.96 | 16.83 | 16.65 | 17.21 | 17.05 |       |
| 0.090 | 0.05 | 1.04 Q9SUN0 | Phosphoribosylformylglycanamide synthase                                  | Pfbs    | 2148 | 41 | 41 | 41 | 46.1 | 46.1 | 46.1 | 144.63 | 0.0000 | 323.31   | 98770000   | 917       | 16.88 | 16.78 | 17.63 | 17.12 | 16.84 | 17.17 | 17.37 |       |
| 0.027 | 0.05 | 1.04 Q9D617 | Protein FAM69A                                                            | Fam69a  | 4994 | 3  | 3  | 3  | 9.6  | 9.6  | 9.6  | 48.936 | 0.0000 | 18.718   | 4125100    | 38        | 12.40 | 14.19 | 13.94 | 14.03 | 14.98 | 12.47 | 13.22 |       |
| 0.112 | 0.05 | 1.04 Q4F081 | Ran GTPase-activating protein 1                                           | Rangap1 | 1101 | 19 | 19 | 19 | 37   | 37   | 37   | 63.53  | 0.0000 | 169.66   | 37328000   | 324       | 16.50 | 16.21 | 16.47 | 15.96 | 16.02 | 16.20 | 16.57 |       |
| 0.133 | 0.05 | 1.04 Q9VDV3 | General transcription factor IIH subunit 3                                | GtII3   | 3843 | 3  | 3  | 3  | 16.2 | 16.2 | 16.2 | 34.244 | 0.0000 | 9.4318   | 11561000   | 21        | 13.98 | 12.60 | 12.91 | 12.91 | 12.60 | 12.91 | 12.91 |       |
| 0.057 | 0.05 | 1.04 Q8B8V3 | Tripartite motif-containing protein 14                                    | Tim14   | 3250 | 21 | 21 | 21 | 51.8 | 51.8 | 51.8 | 49.64  | 0.0000 | 66.502   | 30605000   | 331       | 15.90 | 15.32 | 16.63 | 16.30 | 15.80 | 16.13 | 16.34 |       |
| 0.060 | 0.05 | 1.04 Q3TBD2 | Minor histocompatibility protein HA-1                                     | Hma1a   | 1819 | 57 | 57 | 57 | 47.2 | 47.2 | 47.2 | 122.9  | 0.0000 | 323.31   | 227150000  | 1475      | 17.55 | 17.50 | 18.55 | 17.71 | 17.50 | 18.24 | 17.72 |       |
| 0.081 | 0.05 | 1.04 Q8K337 | Type II inositol 1,4,5-trisphosphate 5-phosphatase                        | Inpp5b  | 3687 | 5  | 5  | 5  | 6.7  | 6.7  | 6.7  | 112.76 | 0.0000 | 19.876   | 6953900    | 58        | 14.87 | 14.81 | 15.23 | 15.27 | 14.74 | 15.47 | 15.15 |       |
| 0.141 | 0.05 | 1.04 Q81542 | SNAR-related lipid transfer protein 3                                     | Stn3    | 2368 | 7  | 7  | 7  | 27.6 | 27.6 | 27.6 | 50.469 | 0.0000 | 88.531   | 13160000   | 142       | 19.57 | 19.49 | 19.44 | 15.55 | 15.47 | 15.69 | 15.19 |       |
| 0.105 | 0.05 | 1.04 Q8CB6  | Transmembrane protein 220                                                 | Tmem230 | 3547 | 3  | 3  | 3  | 21.7 | 21.7 | 21.7 | 13.188 | 0.0000 | 8.3668   | 2686700    | 25        | 13.55 | 13.13 | 13.40 | 13.14 | 12.84 | 13.50 | 13.37 |       |
| 0.045 | 0.05 | 1.04 Q8ER73 | Elongator complex 4                                                       | Elp4    | 5297 | 3  | 3  | 3  | 10.2 | 10.2 | 10.2 | 46.325 | 0.0000 | 57.774   | 4394400    | 83        | 15.05 | 13.94 | 14.35 | 15.18 | 14.49 | 14.23 | 15.34 |       |
| 0.057 | 0.05 | 1.04 Q9R061 | Cytosolic Fe-S cluster assembly factor NUPB2                              | Nupb2   | 5616 | 6  | 6  | 5  | 32.7 | 32.7 | 32.7 | 29.518 | 0.0000 | 34.892   | 63192000   | 156       | 17.04 | 17.65 | 18.86 | 18.04 | 17.76 | 18.10 | 18.39 |       |
| 0.115 | 0.05 | 1.04 Q912V6 | ATP synthase subunit alpha, mitochondrial                                 | Atpa1   | 7912 | 69 | 69 | 69 | 79.7 | 79.7 | 79.7 | 59.752 | 0.0000 | 323.31   | 2838600000 | 4339      | 21.10 | 20.99 | 20.98 | 21.18 | 20.88 | 21.10 | 20.84 |       |
| 0.242 | 0.05 | 1.04 Q8R1V4 | Transmembrane emp24 domain-containing protein 4                           | Tmem4   | 3802 | 10 | 8  | 8  | 48.5 | 37.9 | 37.9 | 26.022 | 0.0000 | 129.43   | 30032000   | 126       | 16.76 | 16.42 | 16.36 | 16.98 | 16.41 | 16.68 | 16.71 |       |
| 0.039 | 0.05 | 1.04 Q9C2X0 | Elongator complex protein 3                                               | Elp3    | 4844 | 9  | 9  | 9  | 22.5 | 22.5 | 22.5 | 62.384 | 0.0000 | 25.11    | 10013000   | 108       | 15.48 | 15.41 | 15.97 | 15.91 | 16.17 | 15.41 | 16.28 |       |
| 0.038 | 0.05 | 1.03 P10441 | HA3-interacting domain death agonist:BHS-interacting domain death agonist | Ida3    | 1534 | 5  | 5  | 5  | 34.4 | 34.4 | 34.4 | 46.89  | 0.0000 | 69.43400 | 84         | 15.32     | 14.93 | 15.33 | 16.02 | 15.45 | 16.02 | 15.74 |       |       |
| 0.089 | 0.05 | 1.03 Q8BUB4 | WD repeat and PVE domain-containing protein 7                             | Wdr7    | 3222 | 11 | 11 | 11 | 43.5 | 43.5 | 43.5 | 45.494 | 0.0000 | 84.28    | 13738000   | 114       | 16.11 | 15.83 | 15.45 | 15.73 | 15.39 | 15.68 | 15.57 |       |
| 0.170 | 0.05 | 1.03 Q8D1H8 | 39S ribosomal protein L53, mitochondrial                                  | Mpl53   | 4916 | 6  | 6  | 6  | 55.1 | 55.1 | 55.1 | 12.737 | 0.0000 | 41.869   | 9647800    | 103       | 15.22 | 15.58 | 16.63 | 15.79 | 15.08 | 16.36 | 15.44 |       |
| 0.040 | 0.05 | 1.03 Q9VDN2 | Sodium/potassium-translocating ATPase subunit alpha-1                     | Atpa1a1 | 3962 | 70 | 48 | 52 | 49   | 52.9 | 49.1 | 112.98 | 0.0000 | 323.31   | 860670000  | 2486      | 19.75 | 19.45 | 19.62 | 19.68 | 19.42 | 19.63 | 19.82 |       |
| 0.130 | 0.05 | 1.03 P38060 | Hydroxyethylglutaryl-CoA lyase, mitochondrial                             | Hmgcl   | 3848 | 21 | 21 | 21 | 57.8 | 57.8 | 57.8 | 34.238 | 0.0000 | 323.31   | 119390000  | 617       | 16.28 | 16.03 | 16.83 | 16.10 | 15.12 | 16.16 | 16.24 |       |
| 0.054 | 0.05 | 1.03 P28741 | Kinesin-like protein KIF3A                                                | Kif3a   | 961  | 17 | 16 | 14 | 33.1 | 31.2 | 28.1 | 80.169 | 0.0000 | 169.48   | 24991000   | 237       | 16.14 | 16.01 | 17.16 | 15.81 | 16.17 | 16.21 | 16.20 |       |
| 0.071 | 0.05 | 1.03 P69566 | Ran-binding protein 9                                                     | Ranbp9  | 1524 | 11 | 11 | 11 | 21.9 | 21.9 | 21.9 | 71.011 | 0.0000 | 75.449   | 19294000   | 164       | 15.78 | 15.65 | 16.00 | 15.36 | 15.66 | 15.97 | 15.92 |       |
| 0.056 | 0.05 | 1.04 Q9A952 | Signal recognition particle 9 kDa protein                                 | Srp9    | 1173 | 6  | 6  | 6  | 55.8 | 55.8 | 55.8 | 10.194 | 0.0000 | 10.554   | 7260000    | 33        | 14.93 | 16.18 | 15.88 | 15.89 | 15.51 | 15.86 | 15.61 |       |
| 0.262 | 0.05 | 1.03 P80313 | NADH dehydrogenase [ubiquinone] 1 beta subcomplex subunit 10              | Ndufb10 | 528  | 7  | 7  | 7  | 38.1 | 38.1 | 38.1 | 21.024 | 0.0000 | 25.171   | 25402000   | 128       | 16.50 | 16.56 | 16.76 | 17.16 | 16.50 | 16.56 | 16.76 |       |
| 0.042 | 0.05 | 1.04 Q8BSS9 | Liprin-alpha-2                                                            | Pf1a2   | 3192 | 4  | 4  | 4  | 4.4  | 4.4  | 4.4  | 143.23 | 0.0002 | 5.6333   | 3119600    | 31        | 14.44 | 14.28 | 13.74 | 13.60 | 14.38 | 13.10 | 14.49 |       |
| 0.069 | 0.04 | 1.03 Q9Z050 | POZ domain-containing protein GIPC1                                       | Gipc1   | 5768 | 8  | 8  | 8  | 30.9 | 30.9 | 30.9 | 36.129 | 0.0000 | 25.665   | 12469000   | 158       | 15.10 | 14.89 | 15.29 | 15.44 | 14.83 | 15.62 | 14.80 |       |
| 0.161 | 0.04 | 1.03 Q9B104 | Uncoupler protein 1                                                       | Ucp1    | 4315 | 70 | 67 | 67 | 44.3 | 44.3 | 44.3 | 215.54 | 0.0000 | 323.31   | 128900000  | 1283      | 15.54 | 15.49 | 15.92 | 17.89 | 16.86 | 16.95 | 17.24 |       |
| 0.037 | 0.04 | 1.03 Q6G902 | Epidermal growth factor receptor substrate 15-like 1                      | Eps15l1 | 2220 | 16 | 16 | 16 | 27.7 | 27.7 | 27.7 | 99.307 | 0.0000 | 82.486   | 14381000   | 169       | 15.42 | 15.55 | 16.83 | 15.19 | 15.27 | 16.15 | 15.75 |       |
| 0.078 | 0.04 | 1.03 Q8O865 | MAP kinase-interacting serine/threonine-protein kinase 1                  | Mink1   |      |    |    |    |      |      |      |        |        |          |            |           |       |       |       |       |       |       |       |       |

|       |      |      |        |                                                                        |         |       |    |    |    |       |       |       |        |        |          |           |       |       |       |       |       |       |       |       |       |
|-------|------|------|--------|------------------------------------------------------------------------|---------|-------|----|----|----|-------|-------|-------|--------|--------|----------|-----------|-------|-------|-------|-------|-------|-------|-------|-------|-------|
| 0.067 | 0.02 | 1.01 | Q0R099 | Transducin beta-like protein 2                                         | Tb2     | 5618  | 12 | 12 | 12 | 29.4  | 29.4  | 29.4  | 49.583 | 0.0000 | 72.98    | 19090000  | 240   | 15.75 | 15.54 | 15.72 | 15.71 | 15.49 | 15.70 | 15.91 | 15.60 |
| 0.065 | 0.02 | 1.01 | Q0R600 | Endonuclease G, mitochondrial                                          | Endog   | 280   | 4  | 4  | 4  | 19    | 19    | 19    | 19     | 0.0000 | 11.942   | 3697100   | 30    | 14.43 | 14.67 | 14.07 | 14.04 | 14.30 | 14.50 | 14.65 | 13.68 |
| 0.021 | 0.02 | 1.01 | Q64737 | Trifunctional purine biosynthetic protein adenosine-3-Phosphoribosylam | Gart    | 2464  | 48 | 48 | 48 | 58.3  | 58.3  | 58.3  | 107.5  | 0.0000 | 323.31   | 183360000 | 1349  | 18.13 | 18.10 | 18.17 | 18.22 | 17.94 | 18.12 | 18.43 | 18.05 |
| 0.017 | 0.02 | 1.01 | Q3UJ89 | Enhancer of mRNA-protein complex forming protein 4                     | Eod4    | 1983  | 23 | 23 | 22 | 26.9  | 26.9  | 26.6  | 152.48 | 0.0000 | 286.32   | 43908000  | 417   | 16.17 | 15.87 | 17.07 | 16.04 | 16.15 | 16.42 | 16.55 | 16.28 |
| 0.043 | 0.02 | 1.01 | P22892 | AP-1 complex subunit gamma-1                                           | Argp1   | 871   | 16 | 16 | 16 | 24.16 | 24.16 | 24.1  | 91.349 | 0.0000 | 117.82   | 41284000  | 340   | 16.45 | 16.18 | 16.49 | 16.12 | 16.45 | 16.18 | 16.32 | 16.10 |
| 0.037 | 0.02 | 1.01 | P61924 | Cotachman subunit zeta-1                                               | Copz1   | 1977  | 10 | 10 | 10 | 65.5  | 65.5  | 65.5  | 20.198 | 0.0000 | 255.35   | 76806000  | 360   | 18.21 | 18.12 | 18.44 | 17.76 | 18.06 | 18.32 | 18.17 | 17.91 |
| 0.022 | 0.02 | 1.01 | Q8K136 | Sodium channel modifier 1                                              | Scnm1   | 3615  | 5  | 5  | 5  | 28.8  | 28.8  | 28.8  | 25.823 | 0.0000 | 12.788   | 3446600   | 34    | 14.47 | 14.30 | 14.61 | 14.06 | 14.30 | 13.78 | 14.36 | 14.93 |
| 0.017 | 0.02 | 1.01 | Q8BG49 | Mitochondrial inner membrane protein OXA1L                             | Oxa1    | 2971  | 7  | 7  | 7  | 13.9  | 13.9  | 13.9  | 48.219 | 0.0000 | 8.7887   | 7128200   | 105   | 14.49 | 14.60 | 15.89 | 14.54 | 14.90 | 14.78 | 14.99 | 14.78 |
| 0.043 | 0.02 | 1.01 | P50279 | Ras-related protein Rab-38                                             | Rab38   | 1332b | 2  | 2  | 2  | 13.1  | 13.1  | 13.1  | 24.198 | 0.0000 | 9.4268   | 1056600   | 28    | 13.61 | 13.28 | 12.74 | 13.20 | 12.76 | 13.18 | 13.13 | 13.11 |
| 0.025 | 0.02 | 1.01 | Q60631 | Growth factor receptor-bound protein 2                                 | Grb2    | 2186  | 22 | 22 | 22 | 94.5  | 94.5  | 94.5  | 25.238 | 0.0000 | 120.19   | 28312000  | 277   | 15.52 | 15.81 | 16.08 | 16.31 | 15.85 | 16.17 | 15.51 | 16.12 |
| 0.020 | 0.02 | 1.01 | Q8VDM6 | Heterogeneous nuclear ribonucleoprotein U-like protein 1               | Hnmpu1  | 3961  | 26 | 26 | 26 | 34.3  | 34.3  | 34.3  | 96.001 | 0.0000 | 204.83   | 56222000  | 485   | 16.22 | 15.99 | 17.03 | 16.39 | 16.03 | 16.48 | 16.35 | 16.70 |
| 0.042 | 0.02 | 1.01 | Q8CZV5 | Mitochondrial import receptor subunit TOM70                            | Tomm70a | 4843  | 19 | 19 | 19 | 36.2  | 36.2  | 36.2  | 67.589 | 0.0000 | 212.27   | 20897000  | 330   | 15.85 | 15.96 | 15.90 | 15.76 | 15.78 | 15.76 | 15.21 | 15.66 |
| 0.043 | 0.02 | 1.01 | Q8CZQ0 | CMH domain-containing protein 9                                        | Comm9   | 3667  | 6  | 6  | 6  | 51    | 51    | 51    | 21.85  | 0.0000 | 54.234   | 11362000  | 117   | 15.34 | 15.55 | 16.90 | 15.86 | 15.34 | 15.55 | 16.13 | 16.26 |
| 0.005 | 0.02 | 1.01 | Q8BX90 | Fibronectin type-III domain-containing protein 3A                      | Fndc3a  | 3281  | 10 | 10 | 10 | 11.6  | 11.6  | 11.6  | 131.96 | 0.0000 | 28.593   | 12565000  | 64    | 15.84 | 12.64 | 16.97 | 14.20 | 15.36 | 13.79 | 15.82 | 14.72 |
| 0.022 | 0.02 | 1.01 | Q9QYQ0 | DnaJ homolog subfamily A member 2                                      | Dnaaj2  | 5575  | 17 | 17 | 17 | 50.2  | 50.2  | 50.2  | 45.745 | 0.0000 | 96.881   | 42979000  | 357   | 16.17 | 16.33 | 16.74 | 15.61 | 16.12 | 16.30 | 16.04 | 16.43 |
| 0.046 | 0.02 | 1.01 | Q8A078 | Mitmin, mitochondrial                                                  | Nduaf2  | 2094  | 7  | 7  | 7  | 51.8  | 51.8  | 51.8  | 62.628 | 0.0000 | 94.014   | 9179900   | 116   | 14.80 | 15.22 | 15.16 | 15.86 | 15.16 | 15.10 | 14.97 | 14.86 |
| 0.017 | 0.01 | 1.01 | Q8R653 | Coronin-1A                                                             | Coro1a  | 599   | 37 | 36 | 35 | 67.7  | 66.2  | 64.6  | 50.989 | 0.0000 | 323.31   | 87328000  | 1381  | 19.82 | 20.10 | 21.12 | 20.04 | 20.08 | 20.37 | 20.29 | 20.37 |
| 0.022 | 0.01 | 1.01 | Q3S604 | Niemann-Pick C1 protein                                                | Npc1    | 385   | 11 | 11 | 11 | 8.2   | 8.2   | 8.2   | 142.88 | 0.0000 | 39.411   | 57186000  | 197   | 18.10 | 17.76 | 17.43 | 17.50 | 17.90 | 17.56 | 17.97 | 17.28 |
| 0.008 | 0.01 | 1.01 | Q9D7A8 | Armadillo repeat-containing protein 1                                  | Armc1   | 5025  | 6  | 6  | 6  | 45    | 45    | 45    | 31.246 | 0.0000 | 130.33   | 10534000  | 92    | 16.05 | 15.98 | 14.68 | 14.86 | 15.42 | 14.04 | 16.06 | 15.99 |
| 0.020 | 0.01 | 1.01 | P07091 | Protein S100-A4                                                        | S100a4  | 667   | 13 | 13 | 13 | 64.4  | 64.4  | 64.4  | 11.721 | 0.0000 | 87.064   | 49630000  | 529   | 21.28 | 21.41 | 21.80 | 21.49 | 21.44 | 21.23 | 21.27 | 22.00 |
| 0.015 | 0.01 | 1.01 | Q0Z2L7 | Cytokine receptor-like factor 3                                        | Crf3    | 5889  | 9  | 9  | 9  | 31    | 31    | 31    | 49.558 | 0.0000 | 92.035   | 9415900   | 119   | 15.02 | 14.72 | 15.88 | 15.38 | 14.99 | 15.38 | 15.41 | 15.18 |
| 0.021 | 0.01 | 1.01 | Q8R0P3 | S-formylglutathione hydrolase                                          | Esd     | 5631  | 29 | 29 | 29 | 29    | 96.1  | 96.1  | 31.319 | 0.0000 | 323.31   | 151500000 | 1812  | 20.89 | 21.16 | 21.03 | 20.63 | 21.01 | 21.27 | 20.82 | 20.56 |
| 0.010 | 0.01 | 1.01 | Q6A0D4 | Ratfilin                                                               | Rtn1    | 2502  | 25 | 25 | 25 | 51.3  | 51.3  | 51.3  | 61.536 | 0.0000 | 223.15   | 47251000  | 379   | 16.68 | 16.29 | 17.88 | 16.24 | 16.78 | 16.74 | 16.83 | 16.69 |
| 0.012 | 0.01 | 1.01 | Q8B0R8 | SWI5NF-related matrix-associated actin-dependent regulator of chrom    | Smardc2 | 4346  | 18 | 18 | 18 | 42.4  | 42.4  | 38.8  | 59.064 | 0.0000 | 99.723   | 34673000  | 252   | 16.11 | 16.00 | 17.32 | 15.68 | 16.07 | 16.14 | 16.30 | 16.25 |
| 0.025 | 0.01 | 1.01 | P50516 | V-type protein ATPase catalytic subunit A                              | Atp1a1  | 1184  | 56 | 56 | 56 | 96.1  | 96.1  | 96.1  | 68.325 | 0.0000 | 323.31   | 136450000 | 2699  | 20.63 | 20.46 | 20.22 | 20.51 | 20.61 | 20.20 | 20.63 | 20.35 |
| 0.004 | 0.01 | 1.01 | Q8K3X4 | Interferon regulatory factor 2-binding protein-like                    | Irf2bp1 | 3707  | 6  | 5  | 5  | 11.4  | 10.5  | 10.5  | 80.564 | 0.0000 | 20.402   | 7334000   | 77    | 15.10 | 15.39 | 13.26 | 15.15 | 14.90 | 15.18 | 15.62 | 13.17 |
| 0.017 | 0.01 | 1.01 | P57784 | U2 small nuclear ribonucleoprotein A                                   | Snrnp1  | 1301  | 18 | 18 | 18 | 75.7  | 75.7  | 75.7  | 28.357 | 0.0000 | 323.31   | 38891000  | 280   | 16.55 | 16.19 | 16.79 | 16.12 | 16.39 | 16.64 | 16.46 | 16.13 |
| 0.001 | 0.01 | 1.01 | Q8R257 | Heme-binding protein 1                                                 | Hbb     | 5071  | 8  | 8  | 8  | 71.6  | 71.6  | 71.6  | 21.067 | 0.0000 | 153.69   | 362230000 | 8     | 16.80 | 17.54 | 15.68 | 16.78 | 16.80 | 17.54 | 15.68 | 16.78 |
| 0.012 | 0.01 | 1.01 | Q7R8K2 | Up-regulated during skeletal muscle growth protein 5                   | Usmg5   | 2722  | 4  | 4  | 4  | 44.8  | 44.8  | 44.8  | 6.3814 | 0.0000 | 21.442   | 12122000  | 112   | 15.53 | 16.02 | 14.93 | 15.79 | 15.32 | 15.81 | 15.61 | 15.49 |
| 0.009 | 0.01 | 1.01 | Q9QYQ2 | Mitochondrial import receptor subunit TOM40 homolog                    | Tomm40  | 5565  | 9  | 9  | 9  | 36.3  | 36.3  | 36.3  | 37.895 | 0.0000 | 29.367   | 23668000  | 182   | 16.56 | 16.82 | 17.39 | 16.12 | 16.93 | 16.72 | 17.02 | 16.20 |
| 0.005 | 0.01 | 1.01 | E9Q7D5 |                                                                        | Arhgef5 | 246   | 4  | 4  | 4  | 2.8   | 2.8   | 176.6 | 0.0000 | 2.8085 | 29350000 | 46        | 16.25 | 18.07 | 18.25 | 18.88 | 17.54 | 18.41 | 17.45 | 18.02 |       |
| 0.011 | 0.01 | 1.01 | Q3TVPS | Inactive ubiquitin thioesterase FAM105A                                | Fam105a | 1979  | 5  | 5  | 5  | 11.1  | 11.1  | 11.1  | 19.576 | 0.0000 | 8.311    | 51012000  | 23    | 14.74 | 15.32 | 14.82 | 14.32 | 14.56 | 15.32 | 14.52 | 14.32 |
| 0.005 | 0.01 | 1.01 | Q8QR95 | Adaptin ear-binding coat-associated protein 1                          | Ncapd1  | 4369  | 5  | 5  | 5  | 24.4  | 24.4  | 24.4  | 29.638 | 0.0004 | 4.5864   | 52776000  | 5     | 14.41 | 15.20 | 13.26 | 15.19 | 14.84 | 13.30 | 15.02 | 14.86 |
| 0.005 | 0.01 | 1.01 | P56671 | Myo-associated zinc finger protein                                     | Maz     | 1291  | 2  | 2  | 2  | 4.6   | 4.6   | 4.6   | 48.769 | 0.0000 | 6.2623   | 1507100   | 34    | 13.09 | 12.71 | 14.16 | 14.04 | 12.65 | 13.17 | 14.32 | 13.83 |
| 0.019 | 0.01 | 1.01 | Q61655 | ATP-dependent RNA helicase DDX19A                                      | Ddx19a  | 2320  | 21 | 21 | 20 | 57.9  | 57.9  | 55.6  | 53.932 | 0.0000 | 274.42   | 70916000  | 448   | 17.16 | 17.06 | 17.15 | 17.41 | 17.00 | 17.40 | 17.37 | 16.97 |
| 0.001 | 0.01 | 1.01 | Q8R0P5 | Dactin                                                                 | Dact1   | 5633  | 23 | 18 | 18 | 94.5  | 87.3  | 87.3  | 18.521 | 0.0000 | 91.881   | 69173000  | 388   | 18.41 | 17.84 | 18.17 | 17.79 | 17.62 | 18.29 | 17.75 | 18.29 |
| 0.006 | 0.01 | 1.01 | Q8K330 | Protein phosphatase Slingshot homolog 3                                | Sh3     | 3686  | 13 | 13 | 13 | 32.2  | 32.2  | 32.2  | 72.227 | 0.0000 | 96.604   | 10938000  | 112   | 15.14 | 15.23 | 16.11 | 15.08 | 14.54 | 15.43 | 15.44 | 16.10 |
| 0.011 | 0.01 | 1.01 | Q8D7B6 | Isobutyryl-CoA dehydrogenase, mitochondrial                            | Acd8    | 5027  | 14 | 14 | 14 | 47.7  | 47.7  | 47.7  | 45.019 | 0.0000 | 105.8    | 31368000  | 256   | 16.16 | 16.14 | 15.75 | 16.23 | 16.06 | 16.30 | 16.36 | 15.53 |
| 0.008 | 0.01 | 1.01 | Q8VD08 | NAD-dependent protein deacetylase sirin-2                              | Sir2    | 3968  | 18 | 18 | 17 | 52.2  | 52.2  | 48.3  | 43.256 | 0.0000 | 133.78   | 39199000  | 260   | 16.46 | 16.35 | 17.45 | 16.30 | 16.44 | 16.74 | 16.55 | 16.80 |
| 0.010 | 0.01 | 1.01 | Q8CZV1 | Transmembrane protein 175                                              | Tmem175 | 1308  | 3  | 3  | 3  | 7.8   | 7.8   | 7.8   | 5.577  | 0.0000 | 13.73    | 2222500   | 39    | 13.15 | 13.22 | 12.76 | 13.33 | 13.15 | 13.22 | 12.76 | 13.33 |
| 0.023 | 0.01 | 1.01 | P52480 | Pyruvate kinase PKM                                                    | Pkm     | 1219  | 79 | 79 | 76 | 94.2  | 94.2  | 90    | 97.942 | 0.0000 | 323.31   | 884460000 | 9714  | 23.15 | 23.00 | 22.91 | 22.33 | 23.10 | 22.86 | 23.16 | 23.13 |
| 0.017 | 0.01 | 1.01 | Q8VDJ3 | Vglin                                                                  | Hdlbp   | 3956  | 80 | 80 | 80 | 56.1  | 56.1  | 56.1  | 141.74 | 0.0000 | 323.31   | 32746000  | 1681  | 18.08 | 18.08 | 18.39 | 18.29 | 18.15 | 18.34 | 18.32 | 18.00 |
| 0.005 | 0.01 | 1.01 | P28740 | Kinesin-like protein KIF2A                                             | Kif2a   | 960   | 19 | 19 | 18 | 30.6  | 30.6  | 29.4  | 79.755 | 0.0000 | 77.417   | 16098000  | 231   | 14.72 | 14.56 | 15.90 | 14.94 | 14.62 | 15.45 | 14.95 | 15.09 |
| 0.001 | 0.01 | 1.01 | P10336 | Rho-associated protein kinase 2                                        | Rck2    | 1562  | 30 | 29 | 29 | 27.5  | 26.5  | 24.1  | 10.58  | 0.0000 | 102.15   | 46987000  | 346   | 16.57 | 16.46 | 17.57 | 16.78 | 16.58 | 17.11 | 16.99 | 16.68 |
| 0.006 | 0.00 | 1.01 | Q8K310 | Matrin-3                                                               | Matr3   | 3685  | 44 | 44 | 44 | 54.6  | 54.6  | 54.6  | 94.629 | 0.0000 | 323.31   | 21068000  | 1065  | 18.20 | 18.30 | 18.87 | 18.47 | 18.08 | 18.81 | 18.39 | 18.55 |
| 0.006 | 0.00 | 1.01 | Q8Z1Q5 | Chloride intracellular channel protein 1                               | Cic1    | 5818  | 24 | 24 | 24 | 79.7  | 79.7  | 79.7  | 27.013 | 0.0000 | 323.31   | 83068000  | 1199  | 21.29 | 21.08 | 20.75 | 21.17 | 20.97 | 21.15 | 21.37 | 20.80 |
| 0.008 | 0.00 | 1.01 | Q5RA65 | C-Jun-amino-terminal kinase-interacting protein 4                      | Spag9   | 2832  | 38 | 38 | 30 | 33    | 28.4  | 28.4  | 146.22 | 0.0000 | 290      | 48435000  | 472   | 15.96 | 15.67 | 16.06 | 15.86 | 15.63 | 16.10 | 15.90 | 15.99 |
| 0.001 | 0.00 | 1.01 | Q8CZP8 | Elongation factor Ts, mitochondrial                                    | Eftm    | 4537  | 10 | 10 | 10 | 60.5  | 60.5  | 60.5  | 35.334 | 0.0000 | 166.76   | 165240007 | 135   | 16.07 | 16.23 | 14.96 | 16.52 | 16.37 | 16.73 | 16.29 | 16.42 |
| 0.001 | 0.00 | 1.01 | Q8R049 | ES ubiquitin-protein ligase AMFR                                       | Amfr    | 4517  | 9  | 9  | 9  | 21.3  | 21.3  | 21.3  | 73.104 | 0.0000 | 62.321   | 9293700   | 108   | 14.25 | 15.27 | 17.29 | 15.20 |       |       |       |       |

|       |       |             |                                                                       |              |      |     |     |     |      |      |      |        |        |          |           |         |       |       |       |       |       |       |       |       |
|-------|-------|-------------|-----------------------------------------------------------------------|--------------|------|-----|-----|-----|------|------|------|--------|--------|----------|-----------|---------|-------|-------|-------|-------|-------|-------|-------|-------|
| 0.024 | -0.02 | 0.98 QB8WU5 | Probable RNA N6-adenosine threonylcarbamoyltransferase                | Oagep        | 3267 | 10  | 10  | 10  | 46.9 | 46.9 | 46.9 | 36.3   | 0.0000 | 67.894   | 18494000  | 184     | 16.20 | 15.87 | 15.04 | 16.30 | 15.72 | 16.28 | 16.01 | 15.52 |
| 0.032 | -0.02 | 0.98 QR9R59 | Four and a half LIM domains protein 3                                 | Fhl3         | 5614 | 7   | 7   | 7   | 31.8 | 31.8 | 31.8 | 31.794 | 0.0000 | 11.865   | 10962000  | 65      | 15.63 | 16.07 | 16.69 | 16.05 | 16.01 | 16.45 | 15.86 | 16.21 |
| 0.034 | -0.02 | 0.98 QEP3D0 | U5 snRNA-decapping enzyme                                             | Nudt16       | 2561 | 4   | 4   | 3   | 25.6 | 25.6 | 25.6 | 20     | 21.825 | 0.0000   | 17.761    | 2985800 | 39    | 12.97 | 13.94 | 13.94 | 13.93 | 13.68 | 13.85 | 13.68 |
| 0.067 | -0.02 | 0.98 QEP190 | Poly(1C)-binding protein 2                                            | Pcbp2        | 2345 | 21  | 15  | 15  | 78.2 | 66.3 | 66.3 | 38.221 | 0.0000 | 264.14   | 112430000 | 395     | 17.71 | 17.95 | 18.16 | 18.06 | 17.83 | 18.11 | 18.16 | 17.87 |
| 0.023 | -0.02 | 0.98 QEP542 | ATP-binding cassette sub-family F member 1                            | Abcf1        | 2567 | 32  | 32  | 31  | 44.4 | 44.4 | 44.4 | 94.324 | 0.0000 | 204.58   | 80225000  | 527     | 16.77 | 16.58 | 16.31 | 16.37 | 16.77 | 16.58 | 16.77 | 16.41 |
| 0.027 | -0.03 | 0.98 Q3U0V2 | Tumor necrosis factor receptor type 1-associated DEATH domain protein | Tradd        | 1898 | 6   | 6   | 6   | 37.1 | 37.1 | 37.1 | 34.577 | 0.0000 | 250.41   | 23856000  | 185     | 16.52 | 16.30 | 16.43 | 16.45 | 16.51 | 16.71 | 17.04 | 15.55 |
| 0.047 | -0.03 | 0.98 PE7778 | Prohibitin                                                            | Phb          | 1508 | 32  | 32  | 32  | 94.5 | 94.5 | 94.5 | 29.82  | 0.0000 | 323.31   | 419520000 | 1111    | 16.87 | 18.38 | 19.06 | 18.77 | 18.55 | 18.92 | 18.99 | 18.52 |
| 0.012 | -0.03 | 0.98 B8ZX11 | Queuine RNA-ribosyltransferase subunit QTRD1                          | Qtrd1        | 91   | 5   | 5   | 5   | 17.3 | 17.3 | 17.3 | 46.288 | 0.0000 | 31.77    | 2213900   | 40      | 13.21 | 12.56 | 15.53 | 13.21 | 13.87 | 13.47 | 13.12 | 14.15 |
| 0.021 | -0.03 | 0.98 QB8R77 | Sect1 family domain-containing protein 1                              | Sect1        | 3179 | 20  | 20  | 20  | 50.2 | 50.2 | 50.2 | 72.322 | 0.0000 | 202.68   | 73807000  | 571     | 16.87 | 16.66 | 16.30 | 16.37 | 17.01 | 16.77 | 17.01 | 16.38 |
| 0.033 | -0.03 | 0.98 Q61712 | DnaJ homolog subfamily C member 1                                     | DnaJc1       | 2327 | 11  | 11  | 11  | 23.7 | 23.7 | 23.7 | 63.869 | 0.0000 | 32.258   | 8122400   | 75      | 14.25 | 14.37 | 13.53 | 14.13 | 13.51 | 14.16 | 14.36 | 14.35 |
| 0.021 | -0.03 | 0.98 P47968 | Ribose-5-phosphate isomerase                                          | Rpia         | 1137 | 10  | 10  | 10  | 45.2 | 45.2 | 45.2 | 32.45  | 0.0000 | 74.886   | 14813000  | 144     | 15.71 | 15.64 | 17.08 | 15.15 | 15.64 | 16.16 | 16.05 | 15.85 |
| 0.086 | -0.03 | 0.98 QB8FR5 | Elongation factor Tu, mitochondrial                                   | Tufm         | 2945 | 35  | 35  | 35  | 77.2 | 77.2 | 77.2 | 49.508 | 0.0000 | 323.31   | 109590000 | 1130    | 17.76 | 17.99 | 18.11 | 17.62 | 17.80 | 18.01 | 17.67 | 18.12 |
| 0.012 | -0.03 | 0.98 Q8NC25 | Transcription release factor 1                                        | Tf1f         | 2112 | 10  | 10  | 10  | 12.8 | 12.8 | 12.8 | 125.53 | 0.0000 | 36.599   | 3705500   | 60      | 13.53 | 13.53 | 13.74 | 13.62 | 13.81 | 13.58 | 14.15 | 13.98 |
| 0.048 | -0.03 | 0.98 P46460 | Vesicle-fusing ATPase                                                 | Nef          | 2116 | 49  | 49  | 49  | 69.4 | 69.4 | 69.4 | 82.613 | 0.0000 | 323.31   | 91710000  | 984     | 17.72 | 17.74 | 18.34 | 17.71 | 17.77 | 18.17 | 18.09 | 17.59 |
| 0.026 | -0.03 | 0.98 QO9047 | C3a anaphylatoxin chemotactic receptor                                | C3ar1        | 320  | 5   | 5   | 5   | 10.3 | 10.3 | 10.3 | 53.575 | 0.0000 | 13.357   | 13788000  | 65      | 16.21 | 15.45 | 17.18 | 16.52 | 16.06 | 16.59 | 16.31 | 16.51 |
| 0.067 | -0.03 | 0.98 QB8P48 | Plectin                                                               | Plec         | 5548 | 472 | 472 | 466 | 78.1 | 78.1 | 77.2 | 534.18 | 0.0000 | 323.31   | 261860000 | 12403   | 18.78 | 18.68 | 19.29 | 18.75 | 18.76 | 19.13 | 18.88 | 18.85 |
| 0.180 | -0.03 | 0.98 QB8274 | Guanine nucleotide-binding protein G(I)/G(S)/G(T) subunit beta-1      | Gnb1         | 1459 | 20  | 20  | 12  | 65.3 | 65.3 | 44.1 | 37.377 | 0.0000 | 323.31   | 330700000 | 911     | 19.32 | 19.46 | 19.27 | 19.34 | 19.37 | 19.46 | 19.28 | 19.42 |
| 0.023 | -0.03 | 0.98 PE2075 | Mitochondrial import inner membrane translocase subunit Tim13         | Timm13       | 1402 | 3   | 3   | 3   | 53.7 | 53.7 | 53.7 | 10.458 | 0.0000 | 44.621   | 2228900   | 20      | 12.93 | 14.01 | 15.00 | 14.51 | 13.83 | 14.33 | 14.16 | 14.26 |
| 0.055 | -0.03 | 0.98 Q9CU62 | Structural maintenance of chromosomes protein 1A                      | Smc1a        | 1402 | 74  | 78  | 78  | 58.9 | 58.9 | 58.9 | 143.23 | 0.0000 | 323.31   | 22653000  | 1423    | 18.03 | 17.99 | 18.77 | 18.30 | 18.02 | 18.37 | 18.42 | 18.40 |
| 0.021 | -0.03 | 0.98 Q922J3 | CAP-Gly domain-containing linker protein 1                            | Clp1         | 4260 | 12  | 12  | 10  | 10.4 | 10.4 | 9.3  | 155.81 | 0.0000 | 54.62    | 5278500   | 70      | 14.13 | 13.68 | 15.76 | 15.12 | 14.81 | 15.26 | 14.58 | 14.16 |
| 0.017 | -0.03 | 0.98 Q921N8 | Protein BUD31 homolog                                                 | Bud31        | 2638 | 10  | 10  | 10  | 60.4 | 60.4 | 60.4 | 17     | 0.0000 | 19.105   | 13891000  | 73      | 16.83 | 16.68 | 16.65 | 16.49 | 16.68 | 17.12 | 17.02 | 13.97 |
| 0.029 | -0.03 | 0.98 PE2875 | Transmembrane protein 165                                             | Tmem165      | 1226 | 2   | 2   | 2   | 11.5 | 11.5 | 11.5 | 34.79  | 0.0000 | 15.74    | 6312100   | 72      | 15.20 | 15.03 | 13.53 | 14.79 | 14.72 | 14.55 | 15.06 | 14.37 |
| 0.061 | -0.03 | 0.98 PE5555 | Integrin alpha-1                                                      | Itnm         | 652  | 45  | 45  | 45  | 40   | 40   | 40   | 127.48 | 0.0000 | 323.31   | 243250000 | 1075    | 18.17 | 18.11 | 18.60 | 18.41 | 18.71 | 18.02 | 13.71 | 17.43 |
| 0.036 | -0.04 | 0.98 QSL430 | E3 ubiquitin-protein ligase UBR3                                      | Ubr3         | 2163 | 5   | 5   | 5   | 3.4  | 3.4  | 3.4  | 21.75  | 0.0000 | 20.883   | 13500     | 33      | 14.21 | 13.27 | 13.50 | 12.72 | 13.27 | 13.51 | 13.83 |       |
| 0.050 | -0.04 | 0.98 Q6WV73 | BTPBPOZ domain-containing protein KCTD12                              | Kctd12       | 2667 | 17  | 16  | 15  | 55.4 | 55.4 | 55.4 | 35.892 | 0.0000 | 32.24    | 15648000  | 624     | 18.94 | 18.73 | 17.93 | 18.63 | 18.62 | 18.69 | 18.81 | 18.26 |
| 0.060 | -0.04 | 0.98 P48428 | Tubulin-specific chaperone A                                          | Tbca         | 1144 | 7   | 7   | 7   | 70.4 | 70.4 | 70.4 | 12.758 | 0.0000 | 57.961   | 18704000  | 146     | 16.20 | 16.16 | 16.85 | 16.55 | 16.37 | 16.57 | 16.16 | 16.80 |
| 0.034 | -0.04 | 0.98 Q9CR76 | Transmembrane protein 185                                             | Tmem185      | 4071 | 2   | 2   | 2   | 10.3 | 10.3 | 10.3 | 15.974 | 0.0000 | 10.18300 | 1347      | 12.94   | 12.67 | 13.94 | 12.47 | 12.94 | 13.57 | 13.69 | 13.89 | 13.85 |
| 0.052 | -0.04 | 0.97 QB8SF4 | Phosphatidylserine decarboxylase proenzymic:Phosphatidylserine decar  | Psd          | 3187 | 7   | 7   | 7   | 20.4 | 20.4 | 20.4 | 45.926 | 0.0000 | 28.85    | 4466600   | 46      | 13.58 | 13.88 | 13.23 | 13.85 | 13.67 | 13.33 | 13.47 | 14.22 |
| 0.032 | -0.04 | 0.97 Q35551 | Rab GTPase-binding effector protein 1                                 | Rabep1       | 380  | 5   | 5   | 4   | 8.6  | 8.6  | 6.7  | 99.523 | 0.0004 | 4.7729   | 1589800   | 13      | 14.27 | 12.67 | 13.82 | 13.35 | 13.02 | 13.61 | 13.33 | 13.78 |
| 0.036 | -0.04 | 0.97 Q6NZ66 | Eukaryotic translation initiation factor 4 gamma 1                    | Eif4g1       | 2546 | 47  | 47  | 43  | 33.4 | 33.4 | 30.6 | 176.07 | 0.0000 | 295.24   | 15201000  | 1012    | 17.96 | 17.98 | 19.33 | 18.28 | 17.99 | 18.65 | 18.49 | 18.57 |
| 0.037 | -0.04 | 0.97 QB8P48 | Plectonin aminopeptidase 1                                            | Peap1        | 3159 | 59  | 59  | 59  | 59.3 | 59.3 | 59.3 | 43.221 | 0.0000 | 59.344   | 58055000  | 173     | 17.42 | 17.15 | 17.67 | 17.16 | 17.58 | 17.67 | 17.43 | 16.96 |
| 0.049 | -0.04 | 0.97 Q61549 | EGF-like module-containing mucin-like hormone receptor-like 1         | Emr1         | 2311 | 10  | 10  | 10  | 10   | 10   | 10   | 102.13 | 0.0000 | 197.52   | 62871000  | 322     | 16.97 | 16.48 | 17.70 | 17.21 | 16.87 | 16.48 | 17.30 | 17.00 |
| 0.024 | -0.04 | 0.97 Q6WV10 | Malyleylacetylacetate isomerase                                       | Get2         | 5753 | 3   | 3   | 3   | 19.4 | 19.4 | 19.4 | 24.275 | 0.0000 | 157.71   | 6361800   | 50      | 15.34 | 15.09 | 13.30 | 15.06 | 14.92 | 15.44 | 15.30 | 14.18 |
| 0.030 | -0.04 | 0.97 P56480 | ATP synthase subunit beta, mitochondrial                              | Atp6b        | 1288 | 41  | 41  | 41  | 86.6 | 86.6 | 86.6 | 66.3   | 0.0000 | 323.31   | 184900000 | 2950    | 21.44 | 21.53 | 20.81 | 21.05 | 21.20 | 21.22 | 21.27 | 21.29 |
| 0.027 | -0.04 | 0.97 QB8P23 | Puative ATP-dependent RNA helicase DDX57                              | Ddx57        | 2571 | 5   | 5   | 5   | 6.4  | 6.4  | 6.4  | 156.76 | 0.0000 | 8.7751   | 1554000   | 27      | 13.18 | 13.33 | 13.11 | 13.26 | 13.68 | 13.36 | 13.22 | 13.52 |
| 0.026 | -0.04 | 0.97 QB8MB3 | Eukaryotic translation initiation factor 4E type 2                    | Eif4e2       | 3131 | 3   | 3   | 3   | 13.9 | 13.9 | 13.9 | 28.263 | 0.0000 | 8.3792   | 1732100   | 25      | 12.38 | 14.24 | 13.48 | 14.40 | 13.18 | 14.23 | 13.95 | 13.30 |
| 0.039 | -0.04 | 0.97 Q6ES46 | Beta-parvin                                                           | Parvb        | 5327 | 14  | 14  | 13  | 41.9 | 41.9 | 41.9 | 1.669  | 0.0000 | 82.632   | 35878000  | 187     | 17.16 | 17.70 | 16.25 | 17.62 | 16.93 | 17.10 | 17.41 | 17.45 |
| 0.035 | -0.04 | 0.97 Q6JMH9 | Unconventional myosin-XVIIa                                           | Myo18a       | 5512 | 51  | 51  | 51  | 30.8 | 30.8 | 30.8 | 232.75 | 0.0000 | 323.31   | 53586000  | 630     | 15.35 | 15.34 | 16.92 | 15.57 | 15.51 | 15.96 | 16.11 | 15.78 |
| 0.061 | -0.04 | 0.97 QB8P23 | Integrial phosphatase phosphatase PHOSPHO2                            | Phosph2      | 5102 | 2   | 2   | 2   | 13.7 | 13.7 | 13.7 | 6.2    | 0.0017 | 13.7     | 638500    | 96      | 12.69 | 12.06 | 14.77 | 12.71 | 11.68 | 12.73 | 16.07 | 16.23 |
| 0.075 | -0.04 | 0.97 QB8W02 | Protein VAC14 homolog                                                 | Vac14        | 2860 | 20  | 20  | 20  | 30.3 | 30.3 | 30.3 | 88.047 | 0.0000 | 148.04   | 51152000  | 326     | 17.15 | 16.54 | 17.44 | 16.55 | 16.67 | 17.15 | 17.13 | 17.09 |
| 0.038 | -0.04 | 0.97 Q61183 | Q9WV73(A) polymerase alpha:Poly(A) polymerase beta                    | Papola-Papob | 2269 | 6   | 6   | 6   | 12.2 | 12.2 | 12.2 | 82.308 | 0.0000 | 18.805   | 12463000  | 81      | 15.69 | 15.55 | 16.84 | 15.24 | 15.41 | 16.19 | 15.88 | 16.01 |
| 0.061 | -0.04 | 0.97 Q6R2K3 | CST complex subunit STN1                                              | Otc1         | 3677 | 5   | 5   | 5   | 21.4 | 21.4 | 21.4 | 43.581 | 0.0000 | 9.0947   | 2956500   | 31      | 13.69 | 14.25 | 14.09 | 13.85 | 13.75 | 13.94 | 14.52 | 13.64 |
| 0.031 | -0.04 | 0.97 Q9CPR5 | 36S ribosomal protein L15, mitochondrial                              | Mrp15        | 4530 | 16  | 16  | 16  | 66.1 | 66.1 | 66.1 | 33.641 | 0.0000 | 125.63   | 35958000  | 339     | 15.69 | 15.72 | 16.69 | 16.26 | 15.69 | 16.36 | 16.36 | 16.36 |
| 0.021 | -0.04 | 0.97 Q97388 | TRAF-interacting protein with FHA domain-containing protein A         | Tifa         | 2735 | 5   | 5   | 5   | 27.7 | 27.7 | 27.7 | 21.56  | 0.0000 | 22.12    | 8119000   | 43      | 15.74 | 15.64 | 13.34 | 15.81 | 15.48 | 15.10 | 15.88 | 14.24 |
| 0.131 | -0.04 | 0.97 Q621G4 | V-type proton ATPase 116 kDa subunit a isoform 1                      | Atp6v1a1     | 5808 | 26  | 26  | 25  | 27.8 | 27.8 | 26.9 | 96.466 | 0.0000 | 180.32   | 10143000  | 530     | 17.15 | 16.87 | 17.00 | 17.30 | 17.19 | 17.23 | 17.20 | 16.88 |
| 0.183 | -0.04 | 0.97 Q5JKF1 | Ras GTPase-activating-like protein IQGAP1                             | Iqgap1       | 5450 | 139 | 139 | 135 | 74.6 | 74.6 | 73.7 | 188.74 | 0.0000 | 323.31   | 237190000 | 5676    | 20.32 | 20.25 | 20.58 | 20.34 | 20.36 | 20.51 | 20.52 | 20.28 |
| 0.067 | -0.04 | 0.97 Q92ZV5 | Histone deacetylase 1                                                 | Hdac1        | 5862 | 8   | 8   | 8   | 9.7  | 9.7  | 9.7  | 12.79  | 0.0000 | 19.54    | 8813700   | 79      | 15.71 | 15.28 | 15.48 | 15.86 | 15.45 | 15.58 | 15.94 | 15.55 |
| 0.067 | -0.04 | 0.97 Q5O4P2 | Cyste lectin domain family 12 member A                                | Clec12a      | 2087 | 10  | 10  | 10  | 34.5 | 34.5 | 34.5 | 30.757 | 0.0000 | 34.719   | 2510000   | 148     | 15.86 | 15.47 | 16.52 | 16.10 | 16.07 | 15.82 | 16.21 | 16.03 |
| 0.066 | -0.04 | 0.97 P50580 | Proliferin-associated protein ZG4                                     | Pazg4        | 1188 | 37  | 37  | 37  | 67   | 67   | 67   | 43.698 | 0.0000 | 323.31   | 21140000  | 936     | 18.39 | 18.28 | 19.08 | 18.12 | 18.45 | 18.84 | 18.35 | 18.40 |
| 0.102 | -0.04 | 0.97 Q9YGE6 | Golgin-subfamily A member 5                                           | Golg5a       | 5570 | 34  | 34  | 34  | 56.5 | 56.5 | 56.5 | 82.367 | 0.0000 | 298.6    | 12744000  | 488     | 15.89 | 15.72 | 16    |       |       |       |       |       |

|       |       |             |                                                                              |           |      |    |    |    |      |      |        |          |        |         |           |       |       |       |       |       |       |       |       |       |
|-------|-------|-------------|------------------------------------------------------------------------------|-----------|------|----|----|----|------|------|--------|----------|--------|---------|-----------|-------|-------|-------|-------|-------|-------|-------|-------|-------|
| 0.094 | -0.07 | 0.95 Q0JHK4 | Geranylgeranyl transferase type-2 subunit alpha                              | Rabggt2   | 5365 | 18 | 18 | 18 | 45.1 | 45.1 | 45.1   | 64.989   | 0.0000 | 231.53  | 34411000  | 387   | 16.12 | 15.99 | 16.59 | 16.13 | 15.98 | 16.64 | 16.73 | 15.77 |
| 0.195 | -0.07 | 0.95 Q0DB20 | ATP synthase subunit O, mitochondrial                                        | Atp5o     | 5119 | 24 | 24 | 24 | 79.8 | 79.8 | 79.8   | 23.363   | 0.0000 | 323.31  | 44380000  | 982   | 19.82 | 19.54 | 19.91 | 19.30 | 19.63 | 19.84 | 19.56 | 19.53 |
| 0.054 | -0.07 | 0.95 Q0D404 | 3-oxoacyl-[acyl-carrier-protein] synthase, mitochondrial                     | Oxam      | 4971 | 5  | 5  | 5  | 21.4 | 21.4 | 21.4   | 48.827   | 0.0000 | 52.531  | 3925400   | 68    | 14.59 | 15.01 | 13.23 | 14.42 | 14.50 | 14.92 | 14.58 | 13.83 |
| 0.134 | -0.07 | 0.95 Q0D3P8 | Plasmaenogen receptor (KT)                                                   | Pkgrt     | 4968 | 9  | 9  | 9  | 41.5 | 41.5 | 41.5   | 17.261   | 0.0000 | 20.322  | 28815000  | 136   | 16.97 | 16.80 | 17.27 | 16.56 | 17.24 | 16.59 | 17.16 | 16.92 |
| 0.119 | -0.07 | 0.95 Q0Z7A1 | Long-chain fatty acid transport protein 1                                    | Sic27a1   | 2107 | 12 | 12 | 12 | 27.2 | 27.2 | 27.2   | 27.275   | 0.0000 | 76.723  | 17250000  | 148   | 15.84 | 15.91 | 16.27 | 15.84 | 16.04 | 15.91 | 16.04 | 14.93 |
| 0.115 | -0.07 | 0.95 Q0VCT3 | Aminopeptidase B                                                             | Rnppe     | 3932 | 36 | 36 | 36 | 57.8 | 57.8 | 57.8   | 72.415   | 0.0000 | 323.31  | 209300000 | 906   | 18.27 | 18.33 | 17.36 | 18.22 | 17.94 | 18.14 | 18.22 | 18.17 |
| 0.138 | -0.07 | 0.95 Q0D6R2 | Isochrato dehydrogenase (NAD) subunit alpha, mitochondrial                   | Ildh3a    | 5007 | 21 | 21 | 21 | 51.6 | 51.6 | 51.6   | 39.638   | 0.0000 | 182.15  | 90883000  | 611   | 17.47 | 17.46 | 17.33 | 17.48 | 17.32 | 17.88 | 17.07 | 17.66 |
| 0.090 | -0.07 | 0.95 P0U766 | Cell division control protein 42 homolog                                     | Cdc42     | 1360 | 19 | 19 | 19 | 53.9 | 53.9 | 53.9   | 21.258   | 0.0000 | 255.26  | 107290000 | 1512  | 20.75 | 20.31 | 21.66 | 20.93 | 20.76 | 20.85 | 21.11 | 21.22 |
| 0.113 | -0.07 | 0.95 P1H155 | Bifunctional methylerythridylhydroxylase dehydrogenase/cyclohydrolase, alpha | Mim2      | 8315 | 17 | 17 | 17 | 53.1 | 53.1 | 53.1   | 37.883   | 0.0000 | 129.78  | 40830000  | 299   | 16.48 | 16.79 | 16.61 | 17.04 | 16.31 | 17.25 | 16.48 | 16.93 |
| 0.074 | -0.07 | 0.95 Q0BV06 | tRNA selenocysteine 1-associated protein 1                                   | Tmau1ap   | 2844 | 2  | 2  | 2  | 10.1 | 10.1 | 10.1   | 32.423   | 0.0000 | 7.772   | 1047600   | 24    | 13.67 | 13.93 | 12.84 | 13.93 | 13.09 | 14.31 | 13.68 | 13.59 |
| 0.116 | -0.08 | 0.95 Q0O519 | Xanthine dehydrogenase/oxidase:Xanthine dehydrogenase:Xanthine ox            | Xdh       | 1697 | 57 | 57 | 55 | 47.3 | 46.6 | 46.6   | 146.56   | 0.0000 | 323.31  | 289430000 | 1532  | 18.00 | 17.87 | 18.76 | 18.76 | 18.39 | 18.03 | 18.62 | 18.04 |
| 0.335 | -0.08 | 0.95 P2Q351 | Tyrosine-protein phosphatase non-receptor type 6                             | Ptpn6     | 966  | 61 | 61 | 61 | 85.2 | 85.2 | 85.2   | 67.558   | 0.0000 | 323.31  | 83198000  | 1950  | 20.06 | 19.86 | 20.19 | 20.28 | 20.11 | 20.12 | 20.22 | 20.25 |
| 0.073 | -0.08 | 0.95 Q0R366 | Heteromultimeric superfamily member 5                                        | Igfbf     | 3838 | 1  | 6  | 6  | 12.6 | 12.6 | 12.6   | 65.01    | 0.0000 | 45.841  | 4709600   | 39    | 13.88 | 13.90 | 14.84 | 14.16 | 13.88 | 14.64 | 14.47 | 14.56 |
| 0.450 | -0.08 | 0.95 Q0R081 | Heterogeneous nuclear ribonucleoprotein L                                    | Hnrlp1    | 3750 | 31 | 31 | 31 | 61.6 | 61.6 | 61.6   | 63.963   | 0.0000 | 323.31  | 324740000 | 1006  | 19.84 | 19.06 | 19.02 | 18.84 | 18.89 | 19.14 | 19.01 | 19.13 |
| 0.086 | -0.08 | 0.95 Q0Y1T8 | CSC1-like protein 1                                                          | Tmem63a   | 4180 | 7  | 7  | 7  | 11.9 | 11.9 | 11.9   | 91.859   | 0.0000 | 59.194  | 10005000  | 114   | 15.65 | 15.76 | 15.61 | 14.87 | 15.63 | 15.21 | 16.01 | 15.15 |
| 0.178 | -0.08 | 0.95 A0R6H2 | DENN domain-containing protein 4C                                            | Denn4c    | 63   | 40 | 40 | 40 | 25.8 | 25.8 | 25.8   | 211.46   | 0.0000 | 235.04  | 16514000  | 494   | 15.88 | 15.67 | 16.25 | 15.85 | 15.90 | 16.28 | 16.14 | 15.74 |
| 0.047 | -0.08 | 0.95 Q0Z0P9 | Fatty acid desaturase 2                                                      | Fads2     | 5763 | 4  | 4  | 4  | 11.9 | 11.9 | 11.9   | 52.387   | 0.0000 | 6.9898  | 1395200   | 15    | 12.27 | 13.76 | 13.28 | 13.33 | 12.07 | 13.09 | 14.41 | 13.93 |
| 0.137 | -0.08 | 0.95 Q09KE1 | NAD-dependent malic enzyme, mitochondrial                                    | Me2       | 4372 | 34 | 34 | 34 | 77.1 | 77.1 | 77.1   | 65.798   | 0.0000 | 323.31  | 12628000  | 725   | 15.45 | 17.49 | 16.80 | 17.46 | 17.35 | 17.66 | 17.48 | 17.03 |
| 0.043 | -0.08 | 0.95 P33610 | DNA primase large subunit                                                    | Prim2     | 1003 | 11 | 11 | 11 | 25.7 | 25.7 | 25.7   | 58.408   | 0.0000 | 19.816  | 4565700   | 39    | 13.87 | 12.82 | 15.37 | 14.44 | 13.80 | 13.91 | 15.25 | 13.85 |
| 0.073 | -0.08 | 0.95 Q0R5C5 | Beta-centrinin                                                               | Acr1b     | 3884 | 24 | 11 | 11 | 78.7 | 46.8 | 46.8   | 42.281   | 0.0000 | 194.28  | 35737000  | 236   | 16.94 | 17.03 | 15.88 | 17.14 | 16.58 | 17.29 | 17.19 | 16.24 |
| 0.142 | -0.08 | 0.95 P21855 | B-cell differentiation antigen CD72                                          | Cd72      | 868  | 15 | 15 | 15 | 44.6 | 44.6 | 44.6   | 40.347   | 0.0000 | 112.61  | 18891000  | 141   | 14.75 | 14.54 | 15.95 | 15.30 | 15.13 | 14.92 | 15.90 | 16.01 |
| 0.176 | -0.08 | 0.95 Q09LJ0 | CTTNBP2 N-terminal-like protein                                              | Cttnbp2hl | 4435 | 19 | 19 | 19 | 37.9 | 37.9 | 37.9   | 69.84    | 0.0000 | 54.19   | 14515000  | 165   | 15.00 | 15.16 | 15.61 | 15.16 | 15.47 | 15.54 | 15.07 | 15.15 |
| 0.205 | -0.08 | 0.95 Q0CQF0 | 39S ribosomal protein L11, mitochondrial                                     | Mrp11     | 4592 | 10 | 10 | 10 | 59.4 | 59.4 | 59.4   | 20.68    | 0.0000 | 47.207  | 28152000  | 252   | 15.75 | 15.92 | 16.03 | 15.78 | 15.59 | 16.23 | 16.08 | 15.90 |
| 0.179 | -0.08 | 0.95 Q0J620 | Stomatin-like protein 2, mitochondrial                                       | Slp2l2    | 4336 | 20 | 20 | 20 | 66.9 | 66.9 | 66.9   | 38.384   | 0.0000 | 323.31  | 175260000 | 475   | 16.84 | 16.48 | 16.78 | 17.02 | 16.54 | 17.16 | 17.00 | 16.61 |
| 0.160 | -0.08 | 0.95 Q0Z4C5 | Cytochrome c oxidase subunit NDUF44                                          | Nd4f4     | 2390 | 12 | 12 | 12 | 65.9 | 65.9 | 65.9   | 9.3297   | 0.0000 | 77.975  | 219840000 | 498   | 19.01 | 19.86 | 19.51 | 19.00 | 18.80 | 19.29 | 19.43 | 19.07 |
| 0.131 | -0.08 | 0.95 Q0VE19 | WD repeat-containing protein mio                                             | Mios      | 3983 | 7  | 7  | 7  | 13   | 13   | 13     | 98.334   | 0.0000 | 29.589  | 7877700   | 25    | 16.26 | 15.85 | 14.15 | 15.02 | 16.27 | 12.97 | 16.38 | 15.98 |
| 0.141 | -0.08 | 0.95 Q0WJMS | Succinyl-CoA ligase (ADP/GDP-forming) subunit alpha, mitochondrial           | Sudg1     | 5717 | 15 | 15 | 15 | 38.2 | 38.2 | 38.2   | 36.154   | 0.0000 | 233.69  | 140850000 | 632   | 17.81 | 17.43 | 17.43 | 17.81 | 17.87 | 18.12 | 17.55 | 17.25 |
| 0.193 | -0.08 | 0.95 Q049E5 | AMP-activated protein kinase subunit gamma-1                                 | Prkg1     | 4361 | 11 | 11 | 11 | 43.6 | 43.6 | 43.6   | 91.29    | 0.0000 | 104.52  | 8957900   | 61    | 14.56 | 15.05 | 15.78 | 15.05 | 14.56 | 15.05 | 15.78 | 15.05 |
| 0.232 | -0.08 | 0.94 P47740 | Fatty aldehyde dehydrogenase                                                 | Aldh3a2   | 1118 | 19 | 18 | 18 | 46.7 | 46.7 | 44.2   | 53.97    | 0.0000 | 323.31  | 6285000   | 488   | 17.16 | 16.82 | 16.74 | 17.05 | 17.13 | 17.21 | 16.74 | 17.01 |
| 0.060 | -0.08 | 0.94 Q3UQA7 | Selenoprotein H                                                              | Selh      | 2018 | 5  | 5  | 5  | 63.8 | 63.8 | 63.8   | 12.974   | 0.0000 | 11.68   | 6766300   | 54    | 15.30 | 15.71 | 17.06 | 15.65 | 15.97 | 16.25 | 15.20 | 16.34 |
| 0.175 | -0.08 | 0.94 Q0BF29 | Erlin-2                                                                      | Erlin2    | 2955 | 18 | 12 | 12 | 48.2 | 39.7 | 39.7   | 37.872   | 0.0000 | 200.39  | 40518000  | 270   | 16.87 | 17.01 | 16.49 | 16.39 | 16.77 | 17.08 | 16.68 | 16.57 |
| 0.103 | -0.08 | 0.94 P07018 | Kinesin-associated protein 3                                                 | Kif20b    | 153  | 6  | 6  | 6  | 9.3  | 9.3  | 9.3    | 91.29    | 0.0000 | 45.752  | 3556200   | 78    | 14.61 | 15.37 | 17.12 | 16.02 | 15.84 | 16.48 | 14.53 | 15.21 |
| 0.043 | -0.08 | 0.94 Q0Z786 | HAUS augmin-like complex subunit 5                                           | Haus5     | 5022 | 8  | 8  | 8  | 19.4 | 19.4 | 18.1   | 69.571   | 0.0000 | 16.738  | 7015500   | 40    | 14.96 | 14.89 | 13.66 | 15.57 | 14.65 | 13.42 | 15.15 | 15.01 |
| 0.046 | -0.08 | 0.94 Q0J6J2 | Replication factor C subunit 4                                               | Rfc4      | 4327 | 11 | 11 | 11 | 29.7 | 29.7 | 29.7   | 39.866   | 0.0000 | 42.8    | 13326000  | 117   | 15.34 | 15.25 | 17.62 | 14.96 | 15.34 | 16.19 | 16.01 | 16.07 |
| 0.087 | -0.08 | 0.94 Q0DC70 | NADH dehydrogenase [ubiquinone] iron-sulfur protein 7, mitochondrial         | Ndufs7    | 5200 | 8  | 8  | 8  | 34.8 | 34.8 | 34.8   | 24.683   | 0.0000 | 92.219  | 8114000   | 127   | 15.94 | 16.54 | 16.61 | 16.67 | 16.90 | 16.41 | 17.09 | 15.69 |
| 0.143 | -0.09 | 0.94 Q3ZT02 | Smn2                                                                         | 2167      | 3    | 3  | 3  | 3  | 50.7 | 50.7 | 50.7   | 8.818    | 0.0000 | 5.4805  | 23071000  | 56    | 13.80 | 13.64 | 15.18 | 14.51 | 13.80 | 13.64 | 15.18 | 14.51 |
| 0.134 | -0.09 | 0.94 Q0CQ65 | S-methyl-S-thioadenosine phosphorylase                                       | Mtp       | 4567 | 16 | 16 | 16 | 58.7 | 58.7 | 58.7   | 31.062   | 0.0000 | 252.43  | 101420000 | 431   | 18.39 | 18.32 | 18.32 | 18.32 | 18.32 | 18.48 | 18.92 | 17.78 |
| 0.109 | -0.09 | 0.94 Q6ZP23 | Zinc finger CCH domain-containing protein 4                                  | Zc3h4     | 2687 | 5  | 5  | 5  | 7.4  | 7.4  | 7.4    | 140.97   | 0.0000 | 17.335  | 3098800   | 40    | 14.41 | 13.88 | 14.78 | 14.21 | 14.32 | 13.86 | 15.03 | 14.33 |
| 0.056 | -0.09 | 0.94 P34960 | Macrophage metalloelastase                                                   | Mmp12     | 1009 | 6  | 6  | 6  | 15.6 | 15.6 | 15.6   | 54.47    | 0.0000 | 11.661  | 4024500   | 46    | 14.85 | 14.75 | 14.87 | 13.70 | 15.60 | 14.92 | 14.64 | 13.37 |
| 0.142 | -0.09 | 0.94 Q0J620 | Stomatin-like protein 2, mitochondrial                                       | Slp2l2    | 4336 | 20 | 20 | 20 | 66.9 | 66.9 | 66.9   | 38.384   | 0.0000 | 323.31  | 175260000 | 475   | 16.84 | 16.48 | 16.78 | 17.02 | 16.54 | 17.16 | 17.00 | 16.61 |
| 0.035 | -0.09 | 0.94 Q01266 | Platelet-activating factor acetylhydrolase IB subunit beta                   | Plaf1b2   | 2276 | 4  | 4  | 4  | 30.1 | 30.1 | 30.1   | 25.981   | 0.0000 | 48.961  | 10535000  | 83    | 15.43 | 15.90 | 12.95 | 16.03 | 16.10 | 14.01 | 15.27 | 15.30 |
| 0.149 | -0.09 | 0.94 Q07566 | Protein diaphanous homolog 2                                                 | Diaph2    | 513  | 34 | 34 | 34 | 39   | 39   | 39     | 124.87   | 0.0000 | 308.47  | 8019000   | 527   | 17.10 | 17.03 | 17.96 | 17.23 | 17.30 | 17.38 | 17.59 | 17.40 |
| 0.191 | -0.09 | 0.94 Q0BRN9 | Coiled-coil and C2 domain-containing protein 1B                              | Ccd21b    | 3183 | 22 | 22 | 22 | 41.3 | 41.3 | 41.3   | 93.09    | 0.0000 | 193.67  | 28434000  | 288   | 15.81 | 15.69 | 16.24 | 16.04 | 15.92 | 16.42 | 15.85 | 15.94 |
| 0.125 | -0.09 | 0.94 Q049E5 | AMP-activated protein kinase subunit gamma-1                                 | Prkg1     | 4361 | 8  | 8  | 8  | 12.9 | 10.2 | 97.864 | 0.0000   | 64.7   | 8959000 | 181       | 14.54 | 14.37 | 15.11 | 15.01 | 14.65 | 15.03 | 14.92 | 14.80 |       |
| 0.114 | -0.09 | 0.94 Q05425 | Bystin                                                                       | Bysl      | 426  | 6  | 6  | 6  | 18.8 | 18.8 | 18.8   | 49.783   | 0.0000 | 25.026  | 4590900   | 93    | 14.35 | 14.27 | 14.67 | 14.44 | 13.85 | 14.97 | 14.97 | 14.29 |
| 0.061 | -0.09 | 0.94 Q0D154 | Leukocyte elastase inhibitor A                                               | Serpinh1a | 4896 | 16 | 16 | 16 | 44.9 | 44.9 | 44.9   | 42.574   | 0.0000 | 25.593  | 17027000  | 118   | 15.13 | 15.61 | 13.72 | 15.55 | 15.40 | 14.53 | 15.65 | 14.78 |
| 0.272 | -0.09 | 0.94 Q0PQ52 | GEM-interacting protein                                                      | Gmip      | 2636 | 34 | 34 | 34 | 40.2 | 40.2 | 40.2   | 107.54   | 0.0000 | 296.87  | 82442000  | 797   | 16.68 | 16.52 | 17.04 | 16.73 | 16.62 | 16.81 | 16.99 | 16.90 |
| 0.122 | -0.09 | 0.94 Q0C131 | Guanine nucleotide-binding protein-like-3                                    | Gnl3      | 3537 | 6  | 6  | 6  | 17.5 | 17.5 | 17.5   | 60.786   | 0.0000 | 73.755  | 3353500   | 30    | 13.81 | 14.04 | 15.28 | 13.60 | 14.04 | 15.28 | 13.60 | 14.04 |
| 0.223 | -0.09 | 0.94 P0O375 | Dihydrofolate reductase                                                      | Dhfr      | 609  | 15 | 15 | 15 | 75.9 | 75.9 | 75.9   | 21.606   | 0.0000 | 130.13  | 4174100   | 218   | 17.41 | 16.97 | 17.65 | 17.32 | 16.76 | 17.50 | 17.80 | 17.65 |
| 0.156 | -0.09 | 0.94 Q64261 | Cyclin-dependent kinase 6                                                    | Cdk6      | 2424 | 15 | 15 | 15 | 57.2 | 57.2 | 55.2   | 37.028</ |        |         |           |       |       |       |       |       |       |       |       |       |



|       |       |              |                                                                                  |         |      |    |    |    |      |      |        |        |        |          |           |       |       |       |       |       |       |       |       |       |
|-------|-------|--------------|----------------------------------------------------------------------------------|---------|------|----|----|----|------|------|--------|--------|--------|----------|-----------|-------|-------|-------|-------|-------|-------|-------|-------|-------|
| 0.184 | -0.17 | 0.89 Q8OU87  | Ubiquitin carboxyl-terminal hydrolase 8                                          | Usp8    | 2825 | 25 | 25 | 25 | 33.7 | 33.7 | 33.7   | 122.61 | 0.0000 | 292.63   | 36406000  | 306   | 15.99 | 15.74 | 17.14 | 15.68 | 16.07 | 16.41 | 16.45 | 16.28 |
| 0.486 | -0.17 | 0.89 Q8ER72  | Cysteine-RNA ligase, cytoplasmic                                                 | Cars    | 5296 | 46 | 46 | 46 | 68.1 | 68.1 | 68.1   | 94.859 | 0.0000 | 323.31   | 101720000 | 740   | 16.92 | 16.74 | 16.41 | 17.05 | 16.75 | 17.01 | 17.07 | 16.95 |
| 0.211 | -0.17 | 0.89 EQG1P8  | Interferon regulatory factor 2-binding protein 2                                 | Itf2bp2 | 228  | 12 | 12 | 11 | 28.9 | 28.9 | 28.9   | 59.291 | 0.0000 | 74.301   | 11372000  | 134   | 15.30 | 15.78 | 16.07 | 15.08 | 15.92 | 16.16 | 15.13 | 16.61 |
| 0.210 | -0.17 | 0.89 Q8Q2L8  | Trafficking protein particle complex subunit 12                                  | Trappc2 | 3665 | 8  | 8  | 8  | 16.2 | 16.2 | 16.2   | 87.693 | 0.0000 | 49.236   | 11535000  | 79    | 16.11 | 16.27 | 15.42 | 16.39 | 16.18 | 16.47 | 16.63 | 15.57 |
| 0.453 | -0.19 | 0.89 Q8Q1G1  | Ras-related protein Rab-1b                                                       | Rab1b   | 4917 | 14 | 14 | 13 | 43.1 | 43.1 | 43.1   | 22.187 | 0.0000 | 323.31   | 243400000 | 688   | 15.97 | 16.82 | 16.32 | 15.84 | 16.89 | 16.34 | 16.82 | 15.88 |
| 0.212 | -0.17 | 0.89 Q8CYR0  | Single-stranded DNA-binding protein, mitochondrial                               | Ssbp1   | 4805 | 7  | 7  | 7  | 43.4 | 43.4 | 43.4   | 17.319 | 0.0000 | 106.78   | 24510000  | 171   | 16.91 | 17.31 | 16.33 | 16.64 | 17.02 | 17.27 | 16.76 | 16.51 |
| 0.269 | -0.17 | 0.89 P53564  | Homeobox protein cut-like 1                                                      | Cux1    | 1232 | 28 | 28 | 16 | 84.4 | 84.4 | 84.4   | 165.59 | 0.0000 | 169.48   | 32110000  | 354   | 15.81 | 16.37 | 16.50 | 15.68 | 15.93 | 16.58 | 16.05 | 16.46 |
| 0.413 | -0.17 | 0.89 Q8K354  | Carbonyl reductase [NADPH] 3                                                     | Cbr3    | 3690 | 27 | 27 | 26 | 28.4 | 28.4 | 28.4   | 30.653 | 0.0000 | 260.56   | 141670000 | 755   | 18.21 | 18.38 | 18.40 | 17.94 | 18.21 | 18.81 | 18.18 | 18.40 |
| 0.375 | -0.17 | 0.89 Q8C4P0  | 3S6 ribosomal protein L33, mitochondrial                                         | Lmr33   | 4617 | 4  | 4  | 4  | 53.8 | 53.8 | 53.8   | 7.158  | 0.0000 | 7.3798   | 68603000  | 80    | 15.19 | 14.91 | 14.92 | 15.36 | 15.26 | 15.88 | 15.10 | 15.57 |
| 0.638 | -0.17 | 0.89 Q8JUL2  | ARF GTPase-activating protein G12                                                | Gi2     | 5488 | 36 | 36 | 32 | 67.2 | 67.2 | 67.2   | 78.765 | 0.0000 | 323.31   | 85527000  | 694   | 17.10 | 16.74 | 17.18 | 17.12 | 17.00 | 17.35 | 17.30 | 17.15 |
| 0.700 | -0.17 | 0.89 Q8P2K6  | Serine/threonine-protein phosphatase 4 regulatory subunit 3A                     | Sme1    | 2557 | 6  | 6  | 4  | 10.6 | 10.6 | 10.6   | 93.841 | 0.0000 | 21.423   | 11905000  | 66    | 16.66 | 16.53 | 13.44 | 16.31 | 16.59 | 15.93 | 14.73 | 16.38 |
| 0.527 | -0.17 | 0.89 Q8VE47  | Ubiquitin-like modifier-activating enzyme 5                                      | Uba5    | 3986 | 12 | 12 | 12 | 42.9 | 42.9 | 42.9   | 44.789 | 0.0000 | 231.59   | 41472000  | 282   | 16.99 | 16.54 | 16.73 | 17.05 | 16.82 | 17.12 | 17.20 | 16.85 |
| 0.352 | -0.17 | 0.89 Q8JL24  | Fennil-like protein 1                                                            | Fnnl1   | 5470 | 59 | 59 | 54 | 45.6 | 45.6 | 45.6   | 122.06 | 0.0000 | 323.31   | 187780000 | 1151  | 17.04 | 17.89 | 16.22 | 16.11 | 17.89 | 16.82 | 16.10 | 16.57 |
| 0.352 | -0.17 | 0.89 Q81543  | Golgi apparatus protein 1                                                        | Gly1    | 2309 | 28 | 28 | 28 | 28.8 | 28.8 | 28.8   | 133.73 | 0.0000 | 65.819   | 38166000  | 350   | 16.11 | 15.74 | 16.71 | 16.09 | 16.52 | 16.19 | 16.31 | 16.32 |
| 0.270 | -0.17 | 0.89 P74522  | Ribosome biogenesis protein BOP1                                                 | Bop1    | 1652 | 12 | 12 | 12 | 23.1 | 23.1 | 23.1   | 82.545 | 0.0000 | 100.51   | 14485000  | 198   | 15.21 | 14.78 | 14.11 | 15.09 | 14.88 | 14.93 | 15.27 | 14.81 |
| 0.396 | -0.17 | 0.89 Q8CWH46 | Ribonucleoside-protein PTE-binding 1                                             | Raver1  | 4709 | 28 | 28 | 28 | 71.9 | 71.9 | 71.9   | 79.381 | 0.0000 | 323.31   | 40217000  | 320   | 16.08 | 16.13 | 16.78 | 16.42 | 16.34 | 16.81 | 16.58 | 16.38 |
| 0.191 | -0.17 | 0.89 P28693  | Ataxin-10                                                                        | Atxn10  | 955  | 9  | 9  | 9  | 17.1 | 17.1 | 17.1   | 53.708 | 0.0000 | 11.76    | 15974000  | 63    | 16.47 | 16.91 | 15.49 | 15.60 | 16.04 | 16.16 | 16.56 | 16.32 |
| 0.784 | -0.17 | 0.89 Q8B997  | Copper transport protein ATOX1                                                   | Atox1   | 314  | 5  | 5  | 5  | 69.1 | 69.1 | 69.1   | 7.3384 | 0.0000 | 102.72   | 33510000  | 251   | 16.90 | 17.01 | 16.64 | 17.10 | 17.11 | 17.17 | 16.95 | 17.12 |
| 0.588 | -0.18 | 0.89 Q3UUL4  | Vacuolar protein sorting-associated protein 51 homolog                           | Vps51   | 2039 | 17 | 17 | 16 | 25.4 | 25.4 | 25.4   | 86.186 | 0.0000 | 145.47   | 20113000  | 218   | 15.53 | 15.27 | 15.45 | 15.81 | 15.48 | 15.91 | 15.73 | 15.64 |
| 0.075 | -0.18 | 0.89 Q3Y1V01 | Lysophospholipid acyltransferase 5                                               | Lpat3   | 4039 | 3  | 3  | 3  | 7.8  | 7.8  | 7.8    | 56.146 | 0.0000 | 74.934   | 12372000  | 84    | 16.20 | 16.84 | 14.55 | 14.85 | 15.39 | 14.17 | 16.98 | 16.59 |
| 0.440 | -0.18 | 0.89 Q8ER80  | Secretory carrier-associated membrane protein 2                                  | Scamp2  | 5315 | 6  | 6  | 6  | 18.8 | 18.8 | 18.8   | 36.464 | 0.0000 | 196.41   | 33388000  | 140   | 17.05 | 17.47 | 17.19 | 17.59 | 17.29 | 17.73 | 17.42 | 17.66 |
| 0.350 | -0.18 | 0.89 Q3UUV1  | Far upstream element-binding protein 2                                           | Khrp    | 1897 | 37 | 37 | 34 | 51.2 | 51.2 | 47.6   | 76.775 | 0.0000 | 323.31   | 223730000 | 1145  | 17.95 | 18.52 | 17.92 | 17.99 | 18.39 | 18.53 | 17.80 | 18.37 |
| 0.256 | -0.18 | 0.89 Q9KVV1  | DnaJ homolog subfamily B member 11                                               | DnaJb11 | 4396 | 12 | 12 | 12 | 35.8 | 35.8 | 35.8   | 40.555 | 0.0000 | 107.63   | 47749000  | 229   | 17.42 | 17.62 | 17.60 | 17.05 | 17.33 | 18.26 | 17.12 | 17.68 |
| 0.315 | -0.18 | 0.89 Q8RY12  | Sulfate:quinone oxidoreductase, mitochondrial                                    | Sqr1    | 5645 | 33 | 33 | 30 | 62.9 | 62.9 | 62.9   | 50.262 | 0.0000 | 323.31   | 170830000 | 778   | 18.11 | 17.71 | 16.78 | 16.08 | 18.61 | 18.26 | 17.42 | 18.18 |
| 0.403 | -0.18 | 0.88 Q8PDX3  | Serine/threonine-protein phosphatase 2A 56 kDa regulatory subunit alpha [Pp2p5a] | Slt2p5a | 2607 | 15 | 15 | 15 | 33.1 | 33.1 | 33.1   | 56.346 | 0.0000 | 41.9     | 15261000  | 221   | 14.88 | 14.96 | 14.60 | 15.24 | 15.09 | 14.40 | 15.26 | 15.31 |
| 0.186 | -0.18 | 0.88 Q8P456  | Serine/threonine-protein kinase SIK3                                             | Slk3    | 2563 | 4  | 4  | 4  | 4.7  | 4.7  | 4.7    | 145.78 | 0.0000 | 134.82   | 1734000   | 24    | 13.37 | 12.73 | 13.53 | 13.31 | 12.45 | 14.03 | 13.52 | 13.52 |
| 0.377 | -0.18 | 0.88 P11103  | Poly [ADP-ribose] polymerase 1                                                   | Parp1   | 738  | 44 | 44 | 44 | 46.7 | 46.7 | 46.7   | 113.1  | 0.0000 | 24.922   | 123720000 | 925   | 17.67 | 17.84 | 18.66 | 18.25 | 18.15 | 18.44 | 18.40 | 18.30 |
| 0.163 | -0.18 | 0.88 Q8K325  | Protein kinase C-epsilon                                                         | Pkc3    | 3703 | 12 | 12 | 12 | 37.3 | 37.3 | 37.3   | 30.829 | 0.0000 | 24.916   | 75993000  | 89    | 14.32 | 13.91 | 14.32 | 14.32 | 14.32 | 14.32 | 14.32 | 14.32 |
| 0.177 | -0.18 | 0.88 Q9QWY8  | Arf-GAP with SH3 domain, ANK repeat and PH domain-containing protein Aasp1       | Aasp1   | 5530 | 18 | 18 | 18 | 21.8 | 21.8 | 21.8   | 127.42 | 0.0000 | 133.11   | 38284000  | 270   | 16.33 | 16.21 | 17.80 | 16.76 | 16.50 | 17.25 | 17.10 | 16.97 |
| 0.104 | -0.18 | 0.88 Q82230  | Sialoadhesin                                                                     | Siglec1 | 2370 | 38 | 38 | 38 | 28.6 | 28.6 | 28.6   | 182.98 | 0.0000 | 228.34   | 75068000  | 458   | 16.38 | 15.51 | 18.42 | 16.94 | 16.86 | 16.83 | 17.48 | 16.89 |
| 0.187 | -0.18 | 0.88 Q8R151  | NFX1-type zinc finger-containing protein 1                                       | Znf1    | 3778 | 43 | 43 | 43 | 25.8 | 25.8 | 25.8   | 218.83 | 0.0000 | 305.67   | 37743000  | 424   | 14.87 | 14.78 | 16.35 | 15.35 | 15.16 | 15.64 | 15.66 | 15.62 |
| 0.137 | -0.18 | 0.88 Q8Q917  | Beta-actinin-like protein 2                                                      | Actb2   | 430  | 13 | 13 | 13 | 43.0 | 43.0 | 43.0   | 32.754 | 0.0000 | 14.559   | 41600000  | 311   | 17.07 | 17.14 | 16.87 | 16.83 | 16.87 | 17.07 | 17.24 | 17.33 |
| 0.182 | -0.18 | 0.88 Q8Y1V4  | MICOS complex subunit Mc25                                                       | Chchd6  | 4070 | 5  | 5  | 22 | 2.2  | 2.2  | 2.2    | 29.832 | 0.0000 | 13.553   | 36810000  | 14    | 13.72 | 15.26 | 14.42 | 13.75 | 14.45 | 14.62 | 14.07 | 14.74 |
| 0.111 | -0.18 | 0.88 Q3UMU9  | Hepatoma-derived growth factor-related protein 2                                 | Hdgfrp2 | 2003 | 5  | 4  | 4  | 10.3 | 9.4  | 9.4    | 74.29  | 0.0000 | 29.467   | 2050200   | 40    | 13.09 | 13.16 | 13.90 | 13.54 | 12.04 | 13.52 | 14.09 | 14.78 |
| 0.671 | -0.18 | 0.88 P23931  | P49Fennil light chain 1;Fennil light chain 2                                     | F11F42  | 968  | 19 | 19 | 18 | 69.4 | 69.4 | 69.4   | 20.802 | 0.0000 | 323.31   | 55721000  | 1034  | 19.92 | 19.92 | 19.78 | 19.86 | 20.28 | 20.14 | 20.11 | 19.69 |
| 0.338 | -0.18 | 0.88 P14731  | Lamin-B1                                                                         | Lmb1    | 7851 | 79 | 77 | 72 | 83.2 | 83.2 | 83.2   | 76.785 | 0.0000 | 323.31   | 404700000 | 2093  | 16.38 | 16.09 | 16.16 | 16.16 | 16.38 | 16.09 | 16.16 | 16.38 |
| 0.351 | -0.18 | 0.88 Q3TC46  | Protein PAT1 homolog 1                                                           | Pat1    | 1823 | 10 | 10 | 10 | 16.6 | 16.6 | 16.6   | 86.769 | 0.0000 | 71.248   | 17111000  | 165   | 15.30 | 15.48 | 16.14 | 15.86 | 15.68 | 16.20 | 15.93 | 15.71 |
| 0.241 | -0.18 | 0.88 Q8JHL0  | Linker for activation of T-cells family member 2                                 | Lat2    | 5367 | 4  | 4  | 4  | 30   | 30   | 30     | 22.876 | 0.0000 | 52.453   | 3040300   | 66    | 14.26 | 13.76 | 14.23 | 13.70 | 14.23 | 13.55 | 14.03 | 14.87 |
| 0.206 | -0.19 | 0.88 Q8K2Q9  | Shoottin-1                                                                       | Kia1598 | 3669 | 30 | 30 | 30 | 44.7 | 44.7 | 44.7   | 71.342 | 0.0000 | 115.59   | 37527000  | 308   | 15.92 | 16.35 | 17.09 | 16.11 | 16.27 | 17.02 | 16.00 | 16.93 |
| 0.132 | -0.19 | 0.88 P38647  | Stress-70 protein, mitochondrial                                                 | Ssq1    | 1067 | 50 | 50 | 50 | 27.2 | 27.2 | 27.2   | 78.466 | 0.0000 | 323.31   | 59750000  | 2045  | 16.88 | 16.20 | 16.78 | 16.58 | 16.88 | 16.20 | 16.78 | 16.58 |
| 0.183 | -0.19 | 0.88 Q8ZQW7  | Spn3                                                                             | 2704    | 7    | 7  | 7  | 7  | 27.8 | 27.8 | 27.8   | 20.313 | 0.0000 | 14.097   | 18940000  | 7     | 61    | 16.62 | 16.59 | 15.23 | 16.26 | 16.64 | 16.23 | 16.92 |
| 0.299 | -0.19 | 0.88 Q8O575  | Kinesin-like protein KIF1B                                                       | Kif1b   | 2179 | 20 | 20 | 15 | 15.1 | 11.7 | 204.08 | 0.0000 | 95.719 | 25050000 | 240       | 15.84 | 15.61 | 16.36 | 15.89 | 15.52 | 16.06 | 16.27 | 16.15 |       |
| 0.708 | -0.19 | 0.88 Q9JYJ4  | TraB domain-containing protein                                                   | Trab1   | 4357 | 6  | 6  | 6  | 28.2 | 28.2 | 42.2   | 32.754 | 0.0000 | 72.763   | 15420000  | 100   | 16.05 | 15.79 | 16.20 | 15.81 | 16.15 | 16.14 | 16.36 | 15.95 |
| 0.253 | -0.19 | 0.88 Q8Q9W7  | Kinesin-like protein KIF13a                                                      | Kif13a  | 5293 | 15 | 15 | 15 | 3.3  | 3.3  | 3.3    | 156.81 | 0.0000 | 23.227   | 5170000   | 65    | 15.24 | 15.09 | 14.56 | 15.79 | 15.38 | 15.62 | 15.16 | 15.27 |
| 0.218 | -0.19 | 0.88 P97737  | Tyrosine-protein phosphatase non-receptor type substrate 1                       | Sipa    | 1671 | 11 | 11 | 11 | 34.9 | 34.9 | 34.9   | 56.413 | 0.0000 | 127.03   | 50425000  | 224   | 17.67 | 16.88 | 17.06 | 17.42 | 17.63 | 17.99 | 17.56 | 16.61 |
| 0.269 | -0.19 | 0.88 Q5U5Q9  | BRCA1-A complex subunit RAP80                                                    | Umc1    | 2168 | 5  | 5  | 5  | 8.1  | 8.1  | 8.1    | 81.477 | 0.0000 | 12.979   | 1269700   | 13    | 12.29 | 12.33 | 12.63 | 12.29 | 13.07 | 11.79 | 12.78 | 12.65 |
| 0.713 | -0.19 | 0.88 Q8JVL6  | Bifunctional poly(adenosine diphosphate) kinase/Poly(ubiquitin) kinase 3-phosph  | Ppk3    | 5452 | 28 | 28 | 28 | 63.6 | 63.6 | 63.6   | 57.223 | 0.0000 | 289.18   | 59897000  | 454   | 16.45 | 16.67 | 16.51 | 16.36 | 16.55 | 16.66 | 16.69 | 16.69 |
| 0.137 | -0.19 | 0.88 Q8Q917  | Glycophosphatidylester phosphodiesterase domain-containing protein 1             | Gdpd1   | 4655 | 9  | 9  | 9  | 27.1 | 27.1 | 27.1   | 35.866 | 0.0000 | 19.514   | 16941000  | 172   | 15.89 | 15.87 | 16.60 | 15.70 | 15.89 | 15.87 | 16.60 | 15.70 |
| 0.140 | -0.19 | 0.88 Q8JUM3  | ADP-ribosylation factor-like protein 6-interacting protein 4                     | Arfip4  | 5501 | 3  | 3  | 3  | 23.3 | 23.3 | 23.3   | 25.524 | 0.0000 | 39.989   | 1821400   | 44    | 13.53 | 14.31 | 15.09 | 12.93 | 14.61 | 13.89 | 14.44 | 13.69 |
| 0.241 | -0.19 | 0.88 Q8JL00  | HAUS augmin-like complex subunit 8                                               | Hau8    | 4401 | 5  | 5  | 5  | 17.7 | 17.7 | 17.7   | 41.5   |        |          |           |       |       |       |       |       |       |       |       |       |

|       |       |      |        |                                                              |          |      |    |    |    |      |      |      |        |        |        |           |      |       |       |       |       |       |       |       |       |
|-------|-------|------|--------|--------------------------------------------------------------|----------|------|----|----|----|------|------|------|--------|--------|--------|-----------|------|-------|-------|-------|-------|-------|-------|-------|-------|
| 0.134 | -0.23 | 0.85 | O54890 | Integrin beta-3                                              | Itg3     | 431  | 3  | 3  | 3  | 5.2  | 5.2  | 5.2  | 86.738 | 0.0000 | 38.83  | 2802200   | 46   | 15.40 | 15.36 | 13.59 | 13.53 | 15.27 | 15.36 | 13.86 | 14.29 |
| 0.893 | -0.23 | 0.85 | O8JZV7 | Putative N-acetylglucosamine-6-phosphate deacetylase         | Amdh2    | 3584 | 18 | 18 | 18 | 62.6 | 62.6 | 62.6 | 43.5   | 0.0000 | 188.49 | 13838000  | 685  | 17.72 | 17.65 | 18.12 | 17.64 | 18.02 | 17.94 | 17.90 | 18.18 |
| 0.721 | -0.23 | 0.85 | O62203 | Splicing factor 3A subunit 2                                 | Sf3a2    | 2369 | 11 | 11 | 11 | 27.8 | 27.8 | 27.8 | 49.911 | 0.0000 | 104.2  | 24505000  | 204  | 15.57 | 15.48 | 15.72 | 15.76 | 15.57 | 16.17 | 15.68 | 16.03 |
| 0.444 | -0.23 | 0.85 | O9QZK7 | Docking protein 3                                            | Dock3    | 5599 | 15 | 15 | 15 | 55.2 | 55.2 | 55.2 | 48.027 | 0.0000 | 73.4   | 37967000  | 600  | 16.67 | 16.00 | 15.21 | 16.00 | 15.63 | 15.67 | 16.30 | 16.00 |
| 0.654 | -0.23 | 0.85 | P29452 | Caspase-1/Caspase-1 subunit p20/Caspase-1                    | Casp1    | 9719 | 29 | 29 | 29 | 60.7 | 60.7 | 60.7 | 66.4   | 0.0000 | 186.35 | 11580000  | 691  | 17.30 | 17.26 | 17.30 | 17.30 | 17.27 | 17.26 | 17.31 | 16.91 |
| 0.174 | -0.23 | 0.85 | O922R0 | cAMP-dependent protein kinase catalytic subunit PRKX         | Prkx     | 4273 | 5  | 5  | 5  | 18.6 | 18.6 | 18.6 | 40.466 | 0.0000 | 13.585 | 3372700   | 42   | 14.17 | 13.13 | 13.04 | 14.09 | 13.02 | 13.65 | 13.69 | 14.99 |
| 0.818 | -0.23 | 0.85 | O64704 | Syntaxin-3                                                   | Stx3     | 2459 | 14 | 14 | 14 | 41.5 | 41.5 | 41.5 | 33.243 | 0.0000 | 236.06 | 26282000  | 191  | 16.25 | 16.11 | 15.83 | 16.43 | 16.08 | 16.38 | 16.68 | 16.41 |
| 0.425 | -0.23 | 0.85 | O8BM83 | ADP-ribosylation factor-binding protein G3A3                 | G3a3     | 3139 | 12 | 11 | 11 | 21.5 | 21.5 | 21.2 | 77.972 | 0.0000 | 85.72  | 14473000  | 144  | 15.61 | 15.35 | 15.27 | 14.70 | 15.07 | 15.79 | 15.47 | 15.51 |
| 0.737 | -0.24 | 0.85 | O873H1 | Tumor suppressor candidate gene 1 protein homolog            | Tucl1    | 2465 | 4  | 4  | 4  | 18   | 18   | 18   | 22.712 | 0.0000 | 45.01  | 4591100   | 61   | 13.16 | 15.31 | 15.07 | 15.45 | 14.38 | 14.68 | 15.33 | 15.31 |
| 0.171 | -0.23 | 0.85 | O9DC48 | Pre-mRNA-processing factor 17                                | Cdco4    | 5192 | 7  | 7  | 7  | 20.2 | 20.2 | 16.8 | 65.46  | 0.0000 | 34.003 | 3314200   | 33   | 14.10 | 13.05 | 12.53 | 14.12 | 13.89 | 13.74 | 14.37 | 12.73 |
| 0.350 | -0.23 | 0.85 | P58389 | Serine/threonine-protein phosphatase 2A activator            | Ppp2r4   | 1314 | 16 | 16 | 16 | 68.4 | 68.4 | 68.4 | 36.71  | 0.0000 | 323.31 | 33490000  | 388  | 17.34 | 17.62 | 16.30 | 17.04 | 17.30 | 17.31 | 17.35 | 17.27 |
| 0.552 | -0.23 | 0.85 | P97379 | Ras GTPase-activating protein-binding protein 2              | G3bp2    | 1640 | 15 | 12 | 12 | 33   | 29.5 | 29.5 | 54.087 | 0.0000 | 60.342 | 20168000  | 221  | 15.73 | 16.08 | 15.62 | 15.63 | 15.89 | 16.49 | 15.85 | 15.75 |
| 0.684 | -0.23 | 0.85 | O8C394 | Nucleolar export mediator factor Nurf1                       | Nurf1    | 3462 | 24 | 24 | 24 | 26.8 | 26.8 | 26.8 | 121.19 | 0.0000 | 65.838 | 26594000  | 280  | 15.85 | 15.84 | 16.69 | 16.04 | 16.36 | 16.47 | 17.33 | 16.31 |
| 0.447 | -0.24 | 0.85 | O8R5A6 | TBC1 domain family member 22A                                | Tbc1d22a | 3883 | 15 | 15 | 15 | 37.6 | 37.6 | 37.6 | 59.362 | 0.0000 | 98.294 | 20132000  | 168  | 15.89 | 16.08 | 15.42 | 15.18 | 15.79 | 15.77 | 16.21 | 15.73 |
| 0.335 | -0.24 | 0.85 | O6ZWY3 | 40S ribosomal protein S27-like                               | Rps27i   | 2710 | 6  | 3  | 3  | 41.7 | 15.5 | 15.5 | 9.4771 | 0.0000 | 15.159 | 52000000  | 122  | 18.78 | 18.18 | 17.39 | 18.43 | 18.53 | 18.43 | 18.44 | 18.32 |
| 0.162 | -0.24 | 0.85 | O8K178 | RNA polymerase II-associated factor 1 homolog                | Rpf1     | 3673 | 4  | 4  | 4  | 11.2 | 11.2 | 11.2 | 60.518 | 0.0000 | 14.616 | 2773500   | 37   | 14.08 | 14.15 | 14.51 | 13.55 | 14.34 | 15.10 | 14.98 | 12.81 |
| 0.752 | -0.24 | 0.85 | P55477 | Interferon regulatory factor 5                               | Irf5     | 1287 | 16 | 16 | 16 | 43.5 | 43.5 | 43.5 | 56.004 | 0.0000 | 80.705 | 33576000  | 293  | 15.86 | 15.94 | 16.13 | 16.16 | 16.36 | 16.40 | 16.44 | 16.45 |
| 0.744 | -0.24 | 0.85 | O9D1B9 | 39S ribosomal protein L28, mitochondrial                     | Mpl28    | 4904 | 13 | 13 | 13 | 51.4 | 51.4 | 51.4 | 30.169 | 0.0000 | 74.389 | 42045000  | 328  | 15.86 | 16.12 | 15.64 | 15.61 | 15.97 | 16.32 | 15.84 | 16.05 |
| 0.443 | -0.24 | 0.85 | O91VR8 | Protein BRICK1                                               | Brk1     | 4074 | 10 | 10 | 10 | 96   | 96   | 96   | 8.7608 | 0.0000 | 37.598 | 34739000  | 127  | 16.74 | 17.24 | 17.39 | 17.19 | 16.88 | 17.56 | 17.28 | 17.10 |
| 0.330 | -0.24 | 0.85 | O9C2M2 | 60S ribosomal protein L15                                    | Rpl15    | 4833 | 17 | 17 | 17 | 59.8 | 59.8 | 59.8 | 24.146 | 0.0000 | 93.054 | 12608000  | 358  | 18.44 | 18.45 | 18.62 | 19.01 | 19.00 | 18.89 | 19.12 | 19.48 |
| 0.955 | -0.24 | 0.85 | O7TMQ7 | WD repeat-containing protein 91                              | Wdr91    | 2748 | 28 | 28 | 28 | 41.2 | 41.2 | 41.2 | 83.42  | 0.0000 | 212.02 | 54762000  | 500  | 15.51 | 16.34 | 16.51 | 16.70 | 16.53 | 16.91 | 16.78 | 16.88 |
| 0.316 | -0.24 | 0.85 | O9BL13 | 3-hydroxyisobutyrate dehydrogenase, mitochondrial            | Hibaadh  | 4403 | 18 | 18 | 18 | 63   | 63   | 63   | 35.44  | 0.0000 | 323.31 | 75549000  | 539  | 17.22 | 17.71 | 18.13 | 16.94 | 17.69 | 18.24 | 17.34 | 17.68 |
| 0.891 | -0.24 | 0.85 | O7O378 | ER membrane protein complex subunit 8                        | Emc8     | 492  | 8  | 8  | 8  | 52.2 | 52.2 | 52.2 | 23.348 | 0.0000 | 106.12 | 33064000  | 284  | 16.39 | 16.39 | 16.21 | 16.24 | 16.40 | 16.93 | 16.48 | 16.93 |
| 0.283 | -0.24 | 0.84 | O9DAV9 | Trimeric intracellular cation channel type B                 | Tmem38b  | 5113 | 4  | 4  | 4  | 13.7 | 13.7 | 13.7 | 32.64  | 0.0000 | 11.568 | 7771900   | 81   | 15.47 | 15.42 | 14.76 | 16.30 | 15.36 | 15.69 | 15.71 | 16.16 |
| 0.649 | -0.24 | 0.84 | O8BK07 | PX domain-containing protein kinase-like protein             | Pxk      | 3278 | 11 | 11 | 11 | 26.8 | 26.8 | 26.8 | 65.23  | 0.0000 | 87.468 | 7984000   | 101  | 14.93 | 15.24 | 15.43 | 15.17 | 14.74 | 15.19 | 15.24 | 15.27 |
| 0.390 | -0.24 | 0.84 | P15379 | CD44 antigen                                                 | Cd44     | 796  | 5  | 5  | 5  | 8.7  | 8.7  | 8.7  | 85.616 | 0.0000 | 40.254 | 57891000  | 174  | 18.38 | 18.30 | 17.34 | 18.45 | 18.39 | 18.19 | 18.27 | 18.58 |
| 0.576 | -0.24 | 0.84 | P63276 | 40S ribosomal protein S17                                    | Rps17    | 1501 | 17 | 17 | 17 | 83.7 | 83.7 | 83.7 | 15.524 | 0.0000 | 323.31 | 32516000  | 813  | 20.29 | 20.02 | 19.69 | 20.36 | 20.18 | 20.18 | 20.71 | 20.27 |
| 0.772 | -0.24 | 0.84 | O9CNC4 | Serine/threonine-protein kinase PAK 2/PAK-2/p27-Pak-2p34     | Prk2     | 3561 | 40 | 39 | 39 | 76.1 | 76.1 | 76.1 | 51.293 | 0.0000 | 323.31 | 27429000  | 1154 | 19.02 | 19.07 | 19.02 | 19.06 | 19.02 | 19.07 | 19.06 | 19.14 |
| 0.417 | -0.25 | 0.84 | O9CR51 | V-type proton ATPase subunit G 1                             | Atp6v1g1 | 4667 | 10 | 10 | 10 | 55.1 | 55.1 | 55.1 | 13.74  | 0.0000 | 323.31 | 35276000  | 204  | 16.54 | 17.33 | 16.52 | 16.95 | 17.52 | 16.81 | 17.21 | 16.77 |
| 0.843 | -0.25 | 0.84 | O8B456 | Calpain small subunit 1                                      | Capns1   | 533  | 26 | 26 | 26 | 66.5 | 66.5 | 66.5 | 28.463 | 0.0000 | 323.31 | 64754000  | 1424 | 19.66 | 19.85 | 19.92 | 19.99 | 19.69 | 19.89 | 19.92 | 20.37 |
| 0.174 | -0.25 | 0.84 | O9GM08 | Uncharacterized protein Cdc4orf homolog                      | Cdc4orf  | 4452 | 2  | 2  | 2  | 24.6 | 24.6 | 24.6 | 7.4043 | 0.0000 | 48.408 | 28367000  | 91   | 17.40 | 16.98 | 18.82 | 16.46 | 17.39 | 18.33 | 17.45 | 17.49 |
| 0.835 | -0.25 | 0.84 | O9DV28 | Protein EVB2                                                 | Evb2b    | 3960 | 5  | 5  | 5  | 11   | 11   | 11   | 47.993 | 0.0000 | 19.254 | 19013000  | 134  | 15.24 | 15.18 | 14.91 | 14.81 | 15.24 | 15.18 | 15.26 | 15.18 |
| 0.027 | -0.25 | 0.84 | O8BSV0 | Aspartylglucosaminyl beta-hydroxylase                        | Ashp     | 3193 | 36 | 36 | 36 | 52.9 | 52.9 | 52.9 | 83.041 | 0.0000 | 314.68 | 88165000  | 761  | 17.17 | 16.89 | 17.07 | 17.26 | 17.15 | 17.23 | 17.53 | 17.48 |
| 0.293 | -0.25 | 0.84 | P70697 | Uroporphyrinogen decarboxylase                               | Urod     | 1585 | 15 | 15 | 15 | 61   | 61   | 61   | 40.691 | 0.0000 | 170.06 | 27493000  | 191  | 16.51 | 16.64 | 15.58 | 16.68 | 16.61 | 15.92 | 17.00 | 16.87 |
| 0.133 | -0.25 | 0.84 | P04370 | Myelin basic protein                                         | Mbp      | 641  | 4  | 4  | 4  | 14.8 | 14.8 | 14.8 | 27.697 | 0.0000 | 11.048 | 3443900   | 45   | 13.55 | 14.13 | 13.63 | 14.47 | 12.73 | 14.01 | 14.05 | 15.99 |
| 0.287 | -0.25 | 0.84 | O8K4J6 | MLK myosin-activated kinase protein 1                        | Myk1     | 3711 | 18 | 18 | 18 | 51.8 | 51.8 | 51.8 | 102.54 | 0.0000 | 39.183 | 26274000  | 149  | 15.84 | 14.54 | 14.40 | 14.53 | 14.53 | 14.54 | 14.54 | 14.49 |
| 0.754 | -0.25 | 0.84 | P97496 | SWI/SNF complex subunit SMARCC1                              | Smrcc1   | 1664 | 13 | 4  | 4  | 13.4 | 6.7  | 6.7  | 122.89 | 0.0000 | 44.207 | 5854800   | 63   | 15.07 | 14.80 | 15.07 | 14.55 | 14.96 | 15.43 | 15.07 | 15.03 |
| 0.557 | -0.25 | 0.84 | O7R2A7 | Nucleosome assembly protein 1-like 4                         | Nap1l4   | 2732 | 16 | 16 | 14 | 56.3 | 56.3 | 53.6 | 42.679 | 0.0000 | 186.36 | 64991000  | 325  | 17.23 | 17.21 | 16.79 | 17.22 | 16.95 | 17.16 | 17.63 | 17.70 |
| 0.526 | -0.25 | 0.84 | P46062 | Signal-induced proliferation-associated protein 1            | Sipa1    | 1102 | 27 | 27 | 27 | 32.1 | 32.1 | 32.1 | 11.02  | 0.0000 | 155.61 | 54544000  | 404  | 16.89 | 16.90 | 16.22 | 17.13 | 16.78 | 17.14 | 17.25 | 16.97 |
| 0.636 | -0.25 | 0.84 | P19258 | Protein Myo17                                                | Myo17    | 6    | 3  | 3  | 3  | 6.4  | 6.4  | 6.4  | 19.686 | 0.0000 | 38.701 | 12123000  | 112  | 15.33 | 15.47 | 15.01 | 15.41 | 15.52 | 15.48 | 15.72 | 15.67 |
| 0.137 | -0.25 | 0.84 | O6ERL0 | Xylyltransferase 2                                           | Xytf2    | 5258 | 5  | 5  | 5  | 6.4  | 6.4  | 6.4  | 96.81  | 0.0000 | 8.5322 | 33086000  | 5    | 37    | 14.16 | 13.15 | 13.68 | 12.52 | 14.19 | 14.76 | 11.96 |
| 0.165 | -0.25 | 0.84 | O6PGG6 | Guanine nucleotide-binding protein-like 3-like protein       | Gnl3l    | 2637 | 3  | 3  | 3  | 9    | 9    | 9    | 65.194 | 0.0000 | 10.726 | 3282800   | 15   | 14.37 | 14.53 | 14.33 | 14.11 | 15.05 | 15.87 | 14.32 | 13.11 |
| 0.900 | -0.25 | 0.84 | O8B573 | Galelectin-9                                                 | Lgalect9 | 273  | 12 | 12 | 12 | 48.7 | 48.7 | 48.7 | 40.035 | 0.0000 | 223.23 | 57999000  | 214  | 17.03 | 16.90 | 17.59 | 17.34 | 17.28 | 17.55 | 17.80 | 17.24 |
| 0.140 | -0.25 | 0.84 | O3UDP0 | WD repeat-containing protein 41                              | Wdr41    | 1941 | 12 | 12 | 12 | 38.3 | 38.3 | 38.3 | 51.51  | 0.0000 | 38.701 | 12123000  | 112  | 15.33 | 15.47 | 15.01 | 15.41 | 15.52 | 15.48 | 15.72 | 15.67 |
| 0.339 | -0.25 | 0.84 | O8DQV5 | Protein AAR2 homolog                                         | Aar2     | 4952 | 3  | 3  | 3  | 13.3 | 13.3 | 13.3 | 43.408 | 0.0000 | 17.121 | 2052100   | 26   | 14.10 | 14.27 | 13.12 | 14.35 | 14.25 | 13.91 | 14.60 | 14.09 |
| 0.542 | -0.25 | 0.84 | O8R326 | Paraspeckle component 1                                      | Pasp1    | 3833 | 12 | 12 | 12 | 34.2 | 34.2 | 34.2 | 58.758 | 0.0000 | 88.849 | 21582000  | 215  | 14.95 | 15.37 | 15.07 | 15.22 | 14.88 | 15.84 | 15.48 | 15.42 |
| 0.210 | -0.26 | 0.84 | O9CQ75 | NADH dehydrogenase [ubiquinone] 1 alpha subcomplex subunit 2 | Ndufa2   | 4570 | 5  | 5  | 5  | 39.4 | 39.4 | 39.4 | 10.916 | 0.0000 | 31.991 | 43827000  | 92   | 17.17 | 17.59 | 19.01 | 17.22 | 17.80 | 18.64 | 17.98 | 17.61 |
| 0.201 | -0.26 | 0.84 | O8BW69 | Calcium release-activated calcium channel protein 1          | Orai1    | 2259 | 2  | 2  | 2  | 10.9 | 10.9 | 10.9 | 33.061 | 0.0000 | 22.85  | 25241000  | 38   | 13.81 | 13.79 | 13.75 | 13.66 | 13.81 | 13.85 | 14.25 | 13.85 |
| 0.440 | -0.26 | 0.84 | O64727 | Vinculin                                                     | Vcl      | 2581 | 69 | 69 | 69 | 69.6 | 69.6 | 69.6 | 116.72 | 0.0000 | 323.31 | 274040000 | 1600 | 17.68 | 17.45 | 18.52 | 17.22 | 17.76 | 18.25 | 18.26 | 18.14 |
| 1.688 | -0.26 | 0.   |        |                                                              |          |      |    |    |    |      |      |      |        |        |        |           |      |       |       |       |       |       |       |       |       |

|       |       |      |         |                                                                                          |                  |       |    |    |      |        |        |        |         |        |           |            |       |       |       |       |       |       |       |       |       |
|-------|-------|------|---------|------------------------------------------------------------------------------------------|------------------|-------|----|----|------|--------|--------|--------|---------|--------|-----------|------------|-------|-------|-------|-------|-------|-------|-------|-------|-------|
| 0.954 | -0.30 | 0.81 | P11835  | Integrin beta-2                                                                          | Igb2             | 750   | 37 | 37 | 37   | 45.1   | 45.1   | 45.1   | 85.025  | 0.0000 | 323.31    | 691180000  | 1282  | 20.55 | 20.24 | 20.85 | 20.33 | 20.89 | 20.79 | 20.95 | 20.55 |
| 0.617 | -0.30 | 0.81 | Q8BH74  | Nuclear pore complex protein Nup107                                                      | Nup107           | 3020  | 12 | 12 | 12   | 20.7   | 20.7   | 20.7   | 106.72  | 0.0000 | 219.32    | 15221000   | 148   | 15.93 | 16.06 | 15.46 | 16.22 | 15.77 | 16.55 | 16.20 | 16.34 |
| 0.641 | -0.30 | 0.81 | P04045  | Nucleolin                                                                                | Ncl              | 695   | 36 | 36 | 36   | 42.1   | 42.1   | 42.1   | 76.722  | 0.0000 | 323.31    | 108880000  | 702   | 17.09 | 17.14 | 17.48 | 17.38 | 17.24 | 17.74 | 17.23 | 18.07 |
| 0.476 | -0.30 | 0.81 | P61222  | ATP-binding cassette sub-family E member 1                                               | Abc1             | 1379  | 37 | 37 | 37   | 64.8   | 64.8   | 64.8   | 67.314  | 0.0000 | 323.31    | 177700000  | 834   | 17.56 | 17.35 | 18.49 | 17.83 | 18.35 | 17.89 | 18.38 | 17.82 |
| 0.584 | -0.30 | 0.81 | Q3TQD9  | Protein phosphatase 1 regulatory subunit 21                                              | Ppy121           | 1831  | 41 | 41 | 41   | 67.1   | 67.1   | 67.1   | 88.371  | 0.0000 | 323.31    | 115580000  | 743   | 17.47 | 17.18 | 18.06 | 17.43 | 17.47 | 17.18 | 17.61 | 17.79 |
| 0.565 | -0.30 | 0.81 | P63037  | DnaJ homolog subfamily A member 1                                                        | DnaJ1            | 1482  | 24 | 24 | 24   | 65     | 65     | 65     | 44.868  | 0.0000 | 260.39    | 74628000   | 485   | 17.16 | 17.53 | 16.91 | 17.32 | 17.05 | 17.85 | 17.31 | 17.94 |
| 0.343 | -0.30 | 0.81 | DQGM23  | Myofibril coil nuclear differentiation antigen-like protein                              | Mndal            | 207   | 21 | 10 | 5    | 39.8   | 18.6   | 12.6   | 60.526  | 0.0000 | 74.87     | 9418800    | 97    | 15.14 | 14.91 | 15.87 | 15.77 | 15.92 | 15.53 | 16.44 | 15.52 |
| 0.544 | -0.31 | 0.81 | Q9CQV7  | Myotend cell inner membrane translocase subunit TIM14                                    | Dnacj19          | 4640  | 10 | 10 | 10   | 78.4   | 78.4   | 78.4   | 12.436  | 0.0000 | 100.84    | 32884000   | 308   | 16.09 | 15.94 | 16.98 | 16.50 | 16.57 | 17.01 | 16.48 | 16.68 |
| 0.723 | -0.31 | 0.81 | Q1TCJ1  | BIRC5 complex subunit Abp1                                                               | Fam175b          | 1827  | 17 | 17 | 17   | 48.9   | 48.9   | 48.9   | 46.929  | 0.0000 | 41.662    | 48612000   | 274   | 16.82 | 16.92 | 16.43 | 16.46 | 16.87 | 16.28 | 16.94 | 16.59 |
| 0.787 | -0.31 | 0.81 | P17918  | Proliferating cell nuclear antigen                                                       | Pcna             | 832   | 20 | 20 | 20   | 80.5   | 80.5   | 80.5   | 28.785  | 0.0000 | 254.73    | 193580000  | 798   | 18.06 | 18.34 | 18.30 | 17.62 | 18.15 | 18.32 | 18.58 | 18.50 |
| 0.244 | -0.31 | 0.81 | Q9QYB5  | Gamma-adducin                                                                            | Add3             | 5567  | 9  | 9  | 9    | 19.3   | 19.3   | 19.3   | 78.776  | 0.0000 | 67.75     | 5857500    | 66    | 12.98 | 13.83 | 14.68 | 14.37 | 14.25 | 14.65 | 14.89 | 13.30 |
| 0.408 | -0.31 | 0.81 | A2J4U4  | Peptidyl-prolyl cis-trans isomerase H                                                    | Baz2b            | 411   | 4  | 4  | 4    | 3.3    | 3.3    | 3.3    | 234     | 0.0000 | 21.261    | 2469400    | 41    | 13.69 | 14.45 | 13.47 | 13.39 | 13.97 | 14.36 | 14.45 | 13.45 |
| 0.517 | -0.31 | 0.81 | Q9Q868  | His2 histone deacetylase corepressor complex component SD53                              | Pyh1             | 5052  | 8  | 8  | 8    | 60.6   | 60.6   | 60.6   | 20.493  | 0.0000 | 60.608    | 16044000   | 8     | 16.05 | 15.54 | 16.78 | 16.46 | 16.53 | 15.94 | 16.09 | 15.93 |
| 0.405 | -0.31 | 0.81 | Q8BR85  | Sin3a histone deacetylase corepressor complex component SD53                             | Sud3             | 3176  | 4  | 4  | 4    | 12.2   | 12.2   | 12.2   | 38.07   | 0.0000 | 20.67     | 1448200    | 40    | 13.41 | 12.22 | 12.69 | 12.94 | 13.48 | 12.52 | 13.47 | 13.02 |
| 0.228 | -0.31 | 0.81 | Q8DVA0  | LEM domain-containing protein 2                                                          | Lem2             | 2512  | 7  | 7  | 7    | 20.5   | 20.5   | 20.5   | 57.506  | 0.0000 | 37.6      | 17640000   | 119   | 15.93 | 16.14 | 17.44 | 14.88 | 16.08 | 16.15 | 16.94 | 16.55 |
| 0.664 | -0.31 | 0.81 | Q9D059  | Histidine triad nucleotide-binding protein 2, mitochondrial                              | Hm12             | 4889  | 6  | 6  | 6    | 47.9   | 47.9   | 47.9   | 17.32   | 0.0000 | 56.729    | 15891000   | 185   | 15.80 | 15.78 | 16.03 | 15.83 | 15.93 | 16.00 | 15.83 | 16.15 |
| 0.213 | -0.31 | 0.81 | Q9Q2614 | Sap30-binding protein                                                                    | Sap30bp          | 1719  | 3  | 3  | 3    | 11     | 11     | 11     | 33.832  | 0.0010 | 4.0566    | 969610     | 3     | 13.03 | 11.20 | 12.97 | 13.24 | 11.83 | 13.03 | 13.35 | 13.38 |
| 0.319 | -0.31 | 0.81 | P03930  | ATP synthase protein 8                                                                   | Mitap8           | 632   | 4  | 4  | 4    | 31.3   | 31.3   | 31.3   | 7.7662  | 0.0000 | 6.5461    | 30127000   | 84    | 17.13 | 16.89 | 18.10 | 18.60 | 17.71 | 18.03 | 18.16 | 18.07 |
| 0.431 | -0.31 | 0.81 | Q8BWW4  | La-related protein 4                                                                     | Larp4            | 3268  | 6  | 6  | 6    | 11.8   | 11.8   | 11.8   | 79.763  | 0.0000 | 29.883    | 4898100    | 54    | 13.93 | 14.02 | 14.26 | 14.44 | 14.25 | 15.01 | 13.73 | 14.90 |
| 0.942 | -0.31 | 0.81 | P62281  | 40S ribosomal protein S11                                                                | Rps11            | 1415  | 26 | 26 | 26   | 78.5   | 78.5   | 78.5   | 18.431  | 0.0000 | 139.02    | 575860000  | 1091  | 19.93 | 19.70 | 19.68 | 20.33 | 20.09 | 20.20 | 20.31 | 20.10 |
| 0.877 | -0.31 | 0.80 | Q8EP47  | Asparagine-tRNA ligase, cytoplasmic                                                      | Nas              | 3158  | 33 | 33 | 33   | 54.9   | 54.9   | 54.9   | 64.279  | 0.0000 | 323.31    | 238080000  | 814   | 18.57 | 18.41 | 18.29 | 18.91 | 18.59 | 18.97 | 19.17 | 18.72 |
| 0.338 | -0.31 | 0.80 | P90027  | 60S acidic ribosomal protein P2                                                          | Rplp2            | 1693  | 7  | 7  | 7    | 79.1   | 79.1   | 79.1   | 11.651  | 0.0000 | 160.82    | 25281000   | 239   | 16.17 | 16.99 | 16.61 | 16.67 | 16.93 | 17.82 | 16.07 | 18.07 |
| 0.759 | -0.31 | 0.80 | Q8OXA5  | 28S ribosomal protein S7, mitochondrial                                                  | Mmp57            | 2875  | 11 | 11 | 10   | 50     | 47.1   | 28.602 | 0.0000  | 46.484 | 15422000  | 150        | 15.90 | 15.72 | 15.28 | 15.72 | 15.57 | 16.24 | 16.20 | 15.87 |       |
| 0.183 | -0.32 | 0.80 | Q9JUR5  | QKI transmembrane protein 9B, transmembrane protein 9B                                   | Timemb1, Timemb9 | 2153  | 4  | 4  | 4    | 25.6   | 25.6   | 25.6   | 22.847  | 0.0000 | 32.987    | 58363200   | 58    | 12.32 | 13.72 | 14.56 | 13.97 | 13.44 | 14.70 | 13.71 | 12.49 |
| 0.250 | -0.32 | 0.80 | Q8SVQ0  | Histone acetyltransferase KAT7                                                           | Kat7             | 5431  | 4  | 4  | 4    | 7.2    | 7.2    | 7.2    | 70.841  | 0.0056 | 2.1789    | 5388400    | 15    | 15.37 | 13.45 | 15.44 | 15.33 | 15.37 | 15.35 | 15.39 | 14.83 |
| 0.269 | -0.32 | 0.80 | Q9RL1E  | RILP-like protein 4                                                                      | Rilp2            | 4423  | 14 | 14 | 13   | 78.2   | 78.2   | 78.2   | 22.393  | 0.0000 | 118.36    | 13737000   | 251   | 15.19 | 16.06 | 15.45 | 14.98 | 15.87 | 16.40 | 14.51 | 16.17 |
| 0.987 | -0.32 | 0.80 | Q90014  | Neutrophil cytosol factor 1                                                              | Ncf1             | 1770  | 37 | 37 | 37   | 75.6   | 75.6   | 75.6   | 44.666  | 0.0000 | 323.31    | 278040000  | 1177  | 18.37 | 18.49 | 18.73 | 18.62 | 18.60 | 19.27 | 18.76 | 18.84 |
| 0.529 | -0.33 | 0.80 | Q70555  | RPSF protein kinase 4                                                                    | Rpsk4            | 5102  | 7  | 7  | 7    | 5.8    | 5.8    | 5.8    | 73.088  | 0.0000 | 4.1129    | 1921400    | 13    | 13.79 | 13.79 | 13.66 | 13.83 | 13.79 | 13.79 | 13.79 | 13.44 |
| 0.313 | -0.32 | 0.80 | P62141  | Serine/threonine-protein phosphatase PP1-beta catalytic subunit                          | Ppp1cb           | 1405  | 19 | 5  | 5    | 53.5   | 17.1   | 37.186 | 0.0000  | 36.361 | 25667000  | 155        | 16.80 | 16.75 | 16.17 | 15.55 | 17.02 | 15.98 | 16.23 | 17.30 |       |
| 0.711 | -0.32 | 0.80 | Q88522  | NF-kappa-B essential modulator                                                           | Ikbkg            | 539   | 4  | 4  | 4    | 13.8   | 13.8   | 13.8   | 47.972  | 0.0000 | 9.6973    | 7457500    | 18    | 15.13 | 15.55 | 15.60 | 15.68 | 15.58 | 16.20 | 15.78 | 15.96 |
| 0.975 | -0.32 | 0.80 | Q8BT18  | Serine/arginine repetitive matrix protein 2                                              | Srm2             | 3201  | 29 | 29 | 29   | 14.4   | 14.4   | 294.84 | 0.0000  | 186.2  | 136730000 | 620        | 18.11 | 17.96 | 17.73 | 18.43 | 18.14 | 18.49 | 18.37 | 18.50 |       |
| 0.520 | -0.32 | 0.80 | Q9C1C6  | Muscleblind-like protein 1                                                               | Mbl1             | 45156 | 15 | 5  | 38.3 | 5      | 15.9   | 15.9   | 22.847  | 0.0000 | 259.59    | 23019000   | 108   | 16.51 | 15.96 | 16.70 | 15.58 | 16.58 | 16.32 | 16.69 | 16.33 |
| 0.256 | -0.32 | 0.80 | P33741  | Serine/threonine-protein kinase WNK1                                                     | Wnk1             | 1801  | 17 | 17 | 17   | 10.6   | 10.6   | 8      | 250.293 | 0.0000 | 27.525    | 9532700    | 84    | 14.45 | 14.51 | 16.29 | 14.05 | 14.63 | 15.50 | 15.18 | 15.18 |
| 1.279 | -0.32 | 0.80 | Q8K124  | Pleckstrin homology domain-containing family O member 2                                  | Plekho2          | 13813 | 33 | 33 | 33   | 63.4   | 63.4   | 63.4   | 53.872  | 0.0000 | 323.31    | 153680000  | 904   | 17.54 | 17.24 | 17.69 | 17.69 | 17.67 | 17.88 | 17.84 | 18.05 |
| 0.568 | -0.32 | 0.80 | Q97113  | Cation-independent mannose-6-phosphate receptor                                          | Igftr            | 1755  | 17 | 17 | 17   | 83.3   | 83.3   | 8.3    | 273.81  | 0.0000 | 70.869    | 19213000   | 202   | 15.53 | 15.31 | 16.28 | 15.79 | 16.50 | 15.93 | 16.01 | 15.75 |
| 1.570 | -0.32 | 0.80 | Q9Q2613 | Eukaryotic translation initiation factor 2A, Eukaryotic translation initiation factor 2A | Eif2a            | 3389  | 34 | 34 | 34   | 64.403 | 64.403 | 64.403 | 17.32   | 0.0000 | 323.31    | 108980000  | 728   | 17.19 | 17.39 | 17.96 | 17.19 | 17.19 | 17.39 | 17.19 | 17.39 |
| 0.438 | -0.32 | 0.80 | Q8QZ06  | Inositol hexakisphosphate and diphosphoinositol-pentakisphosphate kin Prip5k2            | Prip5k2          | 2694  | 16 | 16 | 14   | 19.8   | 19.8   | 16.9   | 128.43  | 0.0000 | 123.18    | 16384000   | 231   | 15.08 | 15.04 | 16.37 | 15.25 | 15.56 | 15.86 | 15.62 | 15.99 |
| 1.343 | -0.32 | 0.80 | P62962  | Profilin-1                                                                               | Pln1             | 1473  | 21 | 21 | 11   | 97.1   | 97.1   | 66.4   | 14.957  | 0.0000 | 323.31    | 3134700000 | 3656  | 22.50 | 22.31 | 21.90 | 22.32 | 22.58 | 22.60 | 22.61 | 22.53 |
| 1.692 | -0.32 | 0.80 | Q9JKP5  | Muscleblind-like protein 1                                                               | Mbl1             | 5456  | 20 | 20 | 7    | 52.5   | 52.5   | 25.2   | 36.975  | 0.0000 | 27.211    | 250970000  | 876   | 19.09 | 19.47 | 19.37 | 19.21 | 19.63 | 19.75 | 19.47 | 19.58 |
| 0.183 | -0.32 | 0.80 | P42561  | Epidermal growth factor receptor substrate 15                                            | Egr15            | 108   | 13 | 13 | 13   | 24     | 24     | 24     | 22.847  | 0.0000 | 259.59    | 23019000   | 108   | 16.51 | 15.96 | 16.70 | 15.58 | 16.58 | 16.32 | 16.69 | 16.33 |
| 0.354 | -0.32 | 0.80 | P35278  | Ras-related protein Rab-5C                                                               | Rab5c            | 1013  | 17 | 17 | 12   | 75     | 75     | 58.6   | 23.412  | 0.0000 | 272.78    | 245490000  | 726   | 18.99 | 18.78 | 17.42 | 18.94 | 18.96 | 18.80 | 19.10 | 19.10 |
| 0.777 | -0.32 | 0.80 | Q61735  | Leukocyte surface antigen CD47                                                           | Cd47             | 2329  | 6  | 6  | 6    | 13.9   | 13.9   | 13.9   | 33.097  | 0.0000 | 133.3     | 39526000   | 131   | 17.61 | 17.09 | 17.20 | 17.87 | 17.80 | 17.61 | 18.03 | 17.63 |
| 0.444 | -0.33 | 0.80 | Q8YVY2  | Nuclear-interacting partner of ALK                                                       | Zc3hc1           | 2907  | 6  | 6  | 6    | 17.6   | 17.6   | 17.6   | 55.196  | 0.0000 | 14.903    | 6480000    | 74    | 15.16 | 14.61 | 13.74 | 14.81 | 14.68 | 15.00 | 15.03 | 14.91 |
| 0.240 | -0.33 | 0.80 | Q9LJ89  | Colicoid coil domain-containing protein 66                                               | Cdc68            | 5420  | 4  | 4  | 9.4  | 9.4    | 9.4    | 46.486 | 0.002   | 5.6657 | 1593700   | 6          | 11.59 | 13.14 | 13.26 | 14.13 | 13.58 | 13.14 | 13.30 | 13.36 |       |
| 0.336 | -0.33 | 0.80 | Q53581  | Acidic leucine-rich nuclear phosphoprotein 32 family member A                            | Apr32a           | 365   | 14 | 10 | 10   | 40.5   | 36.4   | 36.4   | 28.537  | 0.0000 | 42.021    | 14264000   | 127   | 15.26 | 15.71 | 15.00 | 16.10 | 15.05 | 15.72 | 15.94 | 16.68 |
| 0.442 | -0.33 | 0.80 | Q9CX86  | Heterogeneous nuclear ribonucleoprotein A0                                               | Hnrnpa0          | 4750  | 18 | 18 | 18   | 56.7   | 56.7   | 56.7   | 30.53   | 0.0000 | 90.438    | 56471000   | 349   | 17.11 | 16.98 | 16.10 | 17.32 | 16.98 | 17.73 | 16.85 | 17.26 |
| 0.589 | -0.33 | 0.80 | P52927  | High mobility group protein HMGC-1                                                       | Hmgc2            | 1228  | 4  | 4  | 4    | 41.7   | 41.7   | 41.7   | 119.03  | 0.0000 | 12.276    | 1436200    | 12    | 12.75 | 13.26 | 13.70 | 13.49 | 14.10 | 13.51 | 13.54 | 13.37 |
| 0.729 | -0.33 | 0.80 | Q9N868  | 40S ribosomal protein L1, mitochondrial                                                  | Mpl1             | 4403  | 16 | 16 | 16   | 53     | 53     | 37.596 | 0.0000  | 275.6  | 30870000  | 383        | 15.54 | 15.37 | 16.26 | 15.35 | 15.43 | 16.36 | 15.82 | 15.95 |       |
| 0.205 | -0.33 | 0.80 | Q8C075  | Signal-induced proliferation-associated 1-like protein 1                                 | Sipa11           | 388   | 4  | 4  | 3    | 3.8    | 3.8    | 3.1    | 197.03  | 0.0000 | 9.859     | 1259500    | 34    | 12.16 | 11.93 | 14.   |       |       |       |       |       |

|       |       |             |                                                                               |          |      |    |    |    |      |      |        |        |        |          |          |       |       |       |       |       |       |       |       |       |
|-------|-------|-------------|-------------------------------------------------------------------------------|----------|------|----|----|----|------|------|--------|--------|--------|----------|----------|-------|-------|-------|-------|-------|-------|-------|-------|-------|
| 0.219 | -0.37 | 0.78 Q9CYA6 | Zinc finger CCHC domain-containing protein 8                                  | Zochc8   | 4793 | 5  | 5  | 5  | 11.3 | 11.3 | 11.3   | 78.025 | 0.0000 | 19.989   | 4999900  | 51    | 14.38 | 14.41 | 14.08 | 13.80 | 14.86 | 12.61 | 15.17 | 15.50 |
| 0.814 | -0.37 | 0.78 Q7TMW6 | Cytosolic Fe-S cluster assembly factor NARFL                                  | Narf1    | 2751 | 12 | 12 | 12 | 45   | 45   | 45     | 53.107 | 0.0000 | 115.78   | 6965500  | 119   | 14.31 | 14.01 | 14.09 | 14.10 | 14.20 | 14.13 | 15.07 | 14.57 |
| 0.870 | -0.37 | 0.77 Q7CD10 | Calcium uptake protein 2, mitochondrial                                       | Micu2    | 3454 | 7  | 7  | 7  | 22.2 | 22.2 | 22.2   | 49.475 | 0.0000 | 153.4    | 5137000  | 67    | 15.29 | 14.48 | 13.29 | 14.78 | 14.73 | 14.83 | 15.05 | 14.71 |
| 1.190 | -0.37 | 0.77 P7D460 | Vasodilator-stimulated phosphoprotein                                         | Vasp     | 1578 | 17 | 17 | 17 | 44.3 | 44.3 | 44.3   | 39.666 | 0.0000 | 192.42   | 11471000 | 529   | 17.72 | 17.86 | 17.28 | 17.75 | 17.76 | 18.08 | 18.02 | 18.26 |
| 1.401 | -0.37 | 0.77 A2AB89 | Rho GTPase-activating protein 27                                              | Arhgap27 | 15   | 12 | 12 | 12 | 21.2 | 21.2 | 21.2   | 97.047 | 0.0000 | 70.854   | 9977300  | 77    | 15.05 | 14.78 | 14.78 | 14.87 | 14.87 | 14.78 | 15.14 | 14.94 |
| 1.736 | -0.37 | 0.77 Q8K296 | Myotubularin-related protein 3                                                | Mrn3     | 3650 | 9  | 9  | 9  | 13.7 | 13.7 | 13.7   | 133.84 | 0.0000 | 43.594   | 15033000 | 46    | 15.80 | 15.51 | 15.12 | 16.14 | 15.75 | 15.88 | 16.17 | 16.24 |
| 0.484 | -0.37 | 0.77 Q6I749 | Translation initiation factor eIF-2B subunit delta                            | Eif2b4   | 2331 | 17 | 17 | 17 | 42.6 | 42.6 | 42.6   | 57.624 | 0.0000 | 97.038   | 23930000 | 241   | 15.42 | 15.61 | 16.69 | 15.15 | 15.86 | 16.19 | 16.14 | 16.16 |
| 0.674 | -0.37 | 0.77 Q6D7N9 | Adipocyte plasma membrane-associated protein                                  | Apbm     | 5037 | 13 | 13 | 13 | 42.2 | 42.2 | 42.2   | 48.434 | 0.0000 | 191.83   | 37324000 | 325   | 16.58 | 16.55 | 15.87 | 15.56 | 16.49 | 16.32 | 16.72 | 16.50 |
| 1.031 | -0.37 | 0.77 P47962 | 60S ribosomal protein L5                                                      | Rpl5     | 1136 | 35 | 35 | 35 | 67.7 | 67.7 | 67.7   | 34.4   | 0.0000 | 323.31   | 40584000 | 155   | 18.88 | 18.65 | 19.38 | 19.12 | 19.27 | 19.35 | 19.48 | 19.34 |
| 1.310 | -0.37 | 0.77 Q6I830 | Macrophage mannose receptor 1                                                 | Mrc1     | 2338 | 29 | 29 | 29 | 25.3 | 25.3 | 25.3   | 164.98 | 0.0000 | 151.27   | 20369000 | 245   | 15.70 | 14.91 | 16.77 | 16.20 | 17.00 | 15.77 | 16.57 | 15.73 |
| 1.250 | -0.37 | 0.77 Q6JMH6 | Thioredoxin reductase 1, cytoplasmic                                          | Txr1d1   | 5511 | 49 | 49 | 49 | 65.9 | 65.9 | 65.9   | 67.083 | 0.0000 | 323.31   | 46931000 | 1451  | 19.74 | 19.78 | 19.75 | 19.71 | 20.59 | 19.93 | 19.98 | 19.98 |
| 0.560 | -0.37 | 0.77 Q6JKK1 | Syntaxin-6                                                                    | Stx6     | 5453 | 5  | 5  | 5  | 27.5 | 27.5 | 27.5   | 28.996 | 0.0000 | 26.699   | 4424800  | 42    | 14.42 | 14.44 | 14.81 | 14.63 | 14.18 | 15.53 | 14.80 | 15.28 |
| 1.417 | -0.37 | 0.77 Q6J8J2 | Wdr75                                                                         | Wdr75    | 1937 | 4  | 4  | 4  | 7.2  | 7.2  | 7.2    | 94.036 | 0.0000 | 53.998   | 3728400  | 42    | 14.36 | 14.91 | 15.42 | 14.41 | 12.91 | 14.38 | 14.48 | 13.91 |
| 1.266 | -0.38 | 0.77 Q54962 | Barrier-to-autophagosome factor;Barrier-to-autophagosome factor, N-term Barf1 | Barf1    | 437  | 5  | 5  | 5  | 46.1 | 46.1 | 46.1   | 10.102 | 0.0000 | 28.593   | 12686000 | 78    | 16.34 | 13.15 | 18.42 | 16.01 | 16.32 | 16.84 | 16.56 | 15.61 |
| 0.241 | -0.38 | 0.77 P2D934 | Protein EVI2A                                                                 | Evi2a    | 858  | 4  | 4  | 4  | 23.3 | 23.3 | 23.3   | 24.087 | 0.0000 | 31.459   | 4488100  | 44    | 13.18 | 13.18 | 15.20 | 14.40 | 14.18 | 14.99 | 14.80 | 13.14 |
| 1.640 | -0.38 | 0.77 Q6ZWJ9 | 40S ribosomal protein S27                                                     | Rps27    | 2706 | 6  | 6  | 6  | 41.7 | 41.7 | 41.7   | 9.405  | 0.0000 | 51.717   | 14289000 | 275   | 16.87 | 16.28 | 19.30 | 18.83 | 18.91 | 19.43 | 19.51 | 19.50 |
| 0.284 | -0.38 | 0.77 Q6I4B0 | Three-prime repair exonuclease 1                                              | Trex1    | 4139 | 13 | 13 | 13 | 52.2 | 52.2 | 52.2   | 33.675 | 0.0000 | 120.69   | 3157000  | 194   | 15.40 | 15.45 | 17.41 | 16.26 | 15.02 | 16.28 | 17.05 | 16.93 |
| 1.143 | -0.38 | 0.77 Q6QZL0 | Receptor-interacting serine/threonine-protein kinase 3                        | Ripk3    | 5600 | 15 | 15 | 15 | 39.3 | 39.3 | 39.3   | 53.322 | 0.0000 | 151.8    | 37977000 | 245   | 16.15 | 16.24 | 16.48 | 16.18 | 16.19 | 16.73 | 16.73 | 16.91 |
| 1.222 | -0.38 | 0.77 Q8KP03 | TLD domain-containing protein 1                                               | Tldc1    | 3608 | 2  | 2  | 2  | 7    | 7    | 7      | 50.844 | 0.0000 | 29.804   | 861570   | 25    | 12.49 | 12.74 | 15.03 | 12.45 | 12.95 | 14.15 | 13.94 | 13.19 |
| 1.309 | -0.38 | 0.77 Q6I768 | Kinesin-1 heavy chain                                                         | Kif5b    | 2333 | 90 | 90 | 73 | 72.8 | 72.8 | 72.8   | 105.55 | 0.0000 | 323.31   | 33795000 | 2028  | 17.83 | 18.16 | 18.04 | 18.06 | 18.06 | 18.99 | 18.33 | 18.54 |
| 0.401 | -0.38 | 0.77 Q6QZK3 | Nuclear pore glycoprotein p62                                                 | Nup62    | 2406 | 3  | 3  | 3  | 7    | 7    | 7      | 53.254 | 0.0000 | 7.805    | 1759500  | 34    | 13.72 | 13.99 | 15.38 | 12.48 | 14.38 | 14.03 | 15.66 | 14.02 |
| 1.749 | -0.38 | 0.77 Q6Z0H3 | SWI/SNF-related matrix-associated actin-dependent regulator of chrom. Smarca1 | Smarca1  | 5770 | 12 | 12 | 12 | 43.4 | 43.4 | 43.4   | 44.141 | 0.0000 | 210.75   | 18032000 | 200   | 15.58 | 15.70 | 15.06 | 15.41 | 15.35 | 15.89 | 16.25 | 16.09 |
| 0.694 | -0.38 | 0.77 Q5S5B6 | U3 small nuclear RNA-associated protein 18 homolog                            | Utp18    | 2137 | 13 | 13 | 13 | 33.9 | 33.9 | 33.9   | 61.217 | 0.0000 | 102.82   | 14470000 | 156   | 15.37 | 15.37 | 16.08 | 15.19 | 15.51 | 16.38 | 15.80 | 15.85 |
| 0.386 | -0.38 | 0.77 Q6IHW2 | Dynalamin                                                                     | Dynlbp1  | 4131 | 4  | 4  | 4  | 11.9 | 11.9 | 11.9   | 39.651 | 0.0000 | 9.052    | 3394900  | 56    | 14.62 | 14.24 | 16.74 | 14.48 | 20.10 | 15.48 | 14.54 | 15.22 |
| 0.697 | -0.39 | 0.77 Q6R893 | Calpain-2                                                                     | Cnna2    | 1780 | 12 | 12 | 12 | 49.5 | 49.5 | 49.5   | 33.155 | 0.0000 | 51.134   | 24382000 | 133   | 16.36 | 15.76 | 16.56 | 16.90 | 16.83 | 16.73 | 16.67 | 17.02 |
| 1.137 | -0.39 | 0.77 Q69KJ8 | Dynactin subunit 2                                                            | Dctn2    | 4379 | 21 | 21 | 21 | 60.2 | 60.2 | 60.2   | 44.116 | 0.0000 | 181.17   | 55145000 | 444   | 16.17 | 16.52 | 16.10 | 16.38 | 16.43 | 16.96 | 16.41 | 16.91 |
| 0.212 | -0.39 | 0.76 Q6Z533 | 28S ribosomal protein S26, mitochondrial                                      | Mrs26    | 2920 | 6  | 6  | 6  | 37   | 37   | 37     | 23.443 | 0.0000 | 25.695   | 6958500  | 71    | 14.80 | 13.63 | 16.07 | 14.52 | 14.06 | 16.57 | 15.01 | 14.91 |
| 0.172 | -0.39 | 0.76 Q6Z544 | 48S ribosome protein translocation factor 1B                                  | Elfb5    | 1745 | 6  | 6  | 6  | 48.8 | 48.8 | 48.8   | 137.61 | 0.0000 | 268.48   | 17560000 | 174   | 16.87 | 17.20 | 17.42 | 17.14 | 16.79 | 17.26 | 17.19 | 17.51 |
| 1.925 | -0.39 | 0.76 P9Y820 | Mitogen-activated protein kinase kinase kinase kinase 4                       | Map4k4   | 1677 | 16 | 7  | 6  | 15.7 | 8.9  | 8.4    | 140.6  | 0.0000 | 43.828   | 14089000 | 77    | 16.51 | 16.96 | 16.38 | 16.64 | 16.64 | 17.47 | 16.97 | 16.96 |
| 1.410 | -0.39 | 0.76 Q6A026 | Sister chromatid cohesion protein PD55 homolog A                              | Pds5a    | 2495 | 33 | 33 | 33 | 37.5 | 37.5 | 37.5   | 150.33 | 0.0000 | 323.01   | 68400000 | 663   | 16.32 | 16.44 | 16.76 | 16.65 | 16.65 | 16.89 | 17.13 | 17.07 |
| 1.810 | -0.39 | 0.76 Q8BH56 | Amadillo repeat-containing X-linked protein 3                                 | Ammx3    | 3051 | 10 | 10 | 10 | 39.1 | 39.1 | 39.1   | 42.619 | 0.0000 | 131.73   | 15000000 | 146   | 16.40 | 16.07 | 16.04 | 16.24 | 16.40 | 16.78 | 16.38 | 16.65 |
| 0.910 | -0.39 | 0.76 Q6Z403 | Protein NDRG2                                                                 | Nrg1     | 2360 | 10 | 10 | 10 | 40.1 | 40.1 | 40.1   | 93.979 | 0.0000 | 53.979   | 31282000 | 154   | 16.87 | 17.04 | 16.78 | 17.24 | 17.01 | 17.51 | 17.36 | 17.51 |
| 0.259 | -0.39 | 0.76 P10519 | Delta-aminolevulinic acid dehydratase                                         | Alad     | 722  | 9  | 9  | 9  | 49.7 | 49.7 | 49.7   | 36.023 | 0.0000 | 110.04   | 24628000 | 9     | 21.54 | 21.13 | 20.62 | 21.25 | 21.59 | 21.91 | 20.41 | 21.15 |
| 1.248 | -0.39 | 0.76 Q505F5 | Leucine-rich repeat-containing protein 47                                     | Lrrc47   | 2082 | 27 | 27 | 27 | 48.5 | 48.5 | 48.5   | 63.589 | 0.0000 | 310.33   | 15237000 | 708   | 17.31 | 17.45 | 17.49 | 17.41 | 17.54 | 18.03 | 17.79 | 17.86 |
| 0.918 | -0.39 | 0.76 P14869 | 60S acidic ribosomal protein P0                                               | Rplp0    | 787  | 22 | 22 | 22 | 64.4 | 64.4 | 64.4   | 34.216 | 0.0000 | 323.31   | 37582000 | 1038  | 19.55 | 19.56 | 16.65 | 19.46 | 19.23 | 19.28 | 19.01 | 19.27 |
| 1.457 | -0.39 | 0.76 Q6D850 | AR-1 complex subunit sigma-2                                                  | Arp1     | 5104 | 2  | 2  | 2  | 11.9 | 11.9 | 11.9   | 84.926 | 0.0000 | 53.927   | 5687500  | 49    | 14.78 | 14.78 | 15.47 | 15.47 | 14.86 | 15.87 | 15.86 | 15.86 |
| 0.500 | -0.39 | 0.76 Q6Z2C4 | Myotubularin-related protein 1                                                | Mmr1     | 5839 | 4  | 4  | 4  | 8.8  | 8.8  | 8.8    | 75.313 | 0.0000 | 8.453    | 1097800  | 16    | 13.38 | 12.37 | 13.39 | 12.63 | 13.05 | 13.28 | 12.97 | 14.06 |
| 0.935 | -0.40 | 0.76 Q7D496 | H(+)/Cl(-) exchange transporter 7                                             | Cion7    | 509  | 15 | 15 | 15 | 24.4 | 24.4 | 24.4   | 88.712 | 0.0000 | 111.05   | 24490000 | 172   | 15.87 | 15.54 | 15.96 | 15.67 | 16.17 | 16.69 | 15.93 | 15.82 |
| 0.682 | -0.40 | 0.76 Q8QE01 | Pescadillo homolog                                                            | Pes1     | 5272 | 10 | 10 | 10 | 17   | 17   | 17     | 67.795 | 0.0000 | 56.412   | 16081000 | 549   | 15.48 | 14.87 | 15.54 | 15.92 | 15.37 | 15.99 | 15.84 | 16.20 |
| 1.882 | -0.40 | 0.76 Q7D496 | Spring repressin-3                                                            | Spr3     | 506  | 21 | 21 | 21 | 87.7 | 87.7 | 87.7   | 10.169 | 0.0000 | 250.88   | 26009000 | 149   | 16.82 | 16.44 | 16.78 | 16.48 | 16.82 | 16.84 | 16.76 | 16.99 |
| 0.744 | -0.40 | 0.76 P04202 | Transforming growth factor beta-1;Latency-associated peptide                  | Tgfb1    | 637  | 11 | 11 | 11 | 30   | 30   | 30     | 44.309 | 0.0000 | 41.037   | 13864000 | 130   | 14.95 | 15.14 | 15.08 | 15.14 | 15.04 | 16.20 | 15.21 | 15.46 |
| 0.160 | -0.40 | 0.76 Q8BM85 | TBC domain-containing protein kinase-like protein                             | Tbck     | 3129 | 8  | 8  | 8  | 18.5 | 18.5 | 18.5   | 86.37  | 0.0000 | 25.333   | 28024000 | 54    | 16.23 | 16.72 | 18.39 | 17.10 | 18.07 | 18.61 | 15.02 | 18.33 |
| 0.344 | -0.40 | 0.76 Q6Z315 | U4U6 US tri-snRNP-associated protein 1                                        | Uap1     | 5876 | 35 | 35 | 35 | 44.3 | 44.3 | 44.3   | 90.884 | 0.0000 | 235.16   | 29588000 | 243   | 15.41 | 16.25 | 16.33 | 17.12 | 17.37 | 15.49 | 16.76 | 15.88 |
| 1.621 | -0.40 | 0.76 A6Q919 | Protein hsc70                                                                 | Hsc70    | 65   | 5  | 5  | 5  | 10.9 | 10.9 | 10.9   | 84.196 | 0.0000 | 19.945   | 11794000 | 87    | 15.51 | 17.11 | 17.26 | 16.92 | 16.84 | 16.80 | 17.56 | 16.99 |
| 1.862 | -0.40 | 0.76 Q8B172 | CKN2A-interacting protein                                                     | Ckn2aip  | 3054 | 14 | 14 | 14 | 33.6 | 33.6 | 33.6   | 59.744 | 0.0000 | 58.813   | 17811000 | 162   | 15.56 | 15.35 | 15.14 | 15.59 | 15.66 | 15.85 | 15.90 | 15.84 |
| 1.174 | -0.40 | 0.76 Q6EST5 | Acidic leucine-rich nuclear phosphoprotein 32 family member B                 | Anp32b   | 5345 | 15 | 15 | 11 | 32   | 25.4 | 31.078 | 0.0000 | 171.58 | 15524000 | 472      | 18.39 | 18.60 | 18.09 | 18.66 | 18.52 | 18.75 | 19.01 | 19.06 |       |
| 1.239 | -0.40 | 0.76 P97868 | E3 ubiquitin-protein ligase RBBP8                                             | Rbbp8    | 1682 | 7  | 7  | 7  | 6.8  | 6.8  | 6.8    | 199.59 | 0.0000 | 24.638   | 4644400  | 79    | 14.04 | 13.99 | 14.38 | 14.37 | 14.65 | 14.20 | 14.83 | 14.70 |
| 0.152 | -0.40 | 0.76 Q6IWM2 | Pleckstrin homology domain-containing family F member 2                       | Plekhd2  | 4302 | 7  | 7  | 7  | 52.6 | 52.6 | 52.6   | 27.754 | 0.0000 | 19.945   | 11794000 | 87    | 15.51 | 17.11 | 17.26 | 16.92 | 16.84 | 16.80 | 17.56 | 16.99 |
| 1.051 | -0.40 | 0.76 Q6I771 | Kinesin-like protein KIF3B;N-terminally protein KIF3B                         | Kif3b    | 2334 | 29 | 29 | 24 | 42.8 | 36.5 | 35.827 | 0.0000 | 203.21 | 48957000 | 443      | 16.45 | 16.32 | 16.93 | 16.74 | 16.80 | 17.38 | 16.78 | 17.07 |       |
| 1.231 | -0.40 | 0.76 Q6Y7W8 | PERO amino acid-binding with GYF domain-containing protein 2                  | Glyf2    | 2672 | 16 | 16 | 16 | 17   | 17   | 17     | 149.19 | 0.0000 | 193.38   | 28645000 | 255   | 17.17 | 17.60 | 17    |       |       |       |       |       |



|       |       |      |        |                                                                         |                 |      |    |    |    |       |       |       |        |        |        |           |           |       |       |       |       |       |       |       |       |       |
|-------|-------|------|--------|-------------------------------------------------------------------------|-----------------|------|----|----|----|-------|-------|-------|--------|--------|--------|-----------|-----------|-------|-------|-------|-------|-------|-------|-------|-------|-------|
| 1.253 | -0.52 | 0.70 | P39749 | Flap endonuclease 1                                                     | Fen1            | 1055 | 18 | 18 | 18 | 48.4  | 48.4  | 48.4  | 42.314 | 0.0000 | 149.3  | 82708000  | 410       | 16.94 | 17.29 | 17.89 | 17.00 | 17.69 | 17.88 | 17.77 | 17.90 |       |
| 1.085 | -0.52 | 0.70 | Q6D620 | Rab11 family-interacting protein 1                                      | Rab11fip1       | 1498 | 9  | 9  | 9  | 16.4  | 16.4  | 16.4  | 70.683 | 0.0000 | 120.2  | 7790200   | 106       | 14.22 | 15.11 | 15.07 | 14.58 | 15.33 | 15.47 | 15.38 | 14.88 |       |
| 0.809 | -0.52 | 0.70 | P63254 | Cysteine-rich protein 1                                                 | Crip1           | 1498 | 7  | 7  | 6  | 84.4  | 84.4  | 84.4  | 8.5497 | 0.0000 | 19.011 | 82817000  | 299       | 18.02 | 18.31 | 18.50 | 19.05 | 18.82 | 18.09 | 19.45 | 19.60 |       |
| 0.962 | -0.52 | 0.70 | Q8K224 | Condensin complex subunit 1                                             | Ncapd2          | 3681 | 20 | 20 | 20 | 22.2  | 22.2  | 22.2  | 156.86 | 0.0000 | 123.43 | 16826000  | 158       | 14.59 | 15.15 | 15.76 | 15.11 | 15.34 | 15.63 | 16.03 | 15.69 |       |
| 1.479 | -0.52 | 0.70 | Q8C283 | Tripartite motif-containing protein 47                                  | Trim47          | 3331 | 12 | 12 | 11 | 3.1   | 3.1   | 3.1   | 69.912 | 0.0000 | 108.14 | 18401000  | 211       | 16.19 | 16.42 | 16.58 | 16.96 | 16.47 | 16.18 | 16.46 | 15.95 |       |
| 0.784 | -0.52 | 0.70 | Q6I733 | 28S ribosomal protein S31, mitochondrial                                | Mps31           | 2328 | 15 | 15 | 15 | 15    | 37.5  | 37.5  | 43.88  | 0.0000 | 177.21 | 26270000  | 313       | 15.73 | 16.66 | 15.99 | 15.77 | 16.16 | 16.89 | 16.10 | 17.09 |       |
| 1.386 | -0.52 | 0.70 | Q8K005 | Rho GTPase-activating protein 18                                        | Nrgap18         | 3609 | 10 | 10 | 10 | 17.5  | 17.5  | 17.5  | 74.929 | 0.0000 | 33.145 | 13694000  | 140       | 15.84 | 15.21 | 15.10 | 15.37 | 15.76 | 15.64 | 16.10 | 16.12 |       |
| 0.647 | -0.53 | 0.69 | P91369 | Neutrophil cytosol factor 4                                             | Ncf4            | 1634 | 29 | 29 | 29 | 76.1  | 76.1  | 76.1  | 38.707 | 0.0000 | 323.31 | 264540000 | 935       | 18.34 | 18.52 | 16.91 | 18.33 | 18.25 | 18.55 | 18.74 | 18.67 |       |
| 0.196 | -0.53 | 0.69 | Q35691 | Pinin                                                                   | Pinin           | 369  | 24 | 24 | 24 | 26.5  | 26.5  | 26.5  | 82.438 | 0.0000 | 132.43 | 54371000  | 412       | 15.47 | 15.93 | 15.62 | 15.92 | 15.82 | 15.46 | 16.48 | 15.30 |       |
| 0.908 | -0.53 | 0.69 | Q9GKR7 | Peptidyl-prolyl cis-trans isomerase F, mitochondrial                    | Ppilf           | 4392 | 6  | 5  | 5  | 36.9  | 33.5  | 33.5  | 21.737 | 0.0000 | 16.546 | 6546700   | 42        | 15.11 | 15.97 | 14.92 | 15.46 | 16.22 | 16.14 | 15.80 | 15.42 |       |
| 0.961 | -0.53 | 0.69 | Q70200 | Allograft inflammatory factor 1                                         | Aif1            | 374  | 5  | 5  | 5  | 37.4  | 37.4  | 37.4  | 16.91  | 0.0000 | 33.897 | 5939900   | 53        | 14.11 | 15.05 | 14.31 | 14.93 | 14.87 | 14.87 | 15.21 | 15.55 |       |
| 0.434 | -0.53 | 0.69 | Q8BG51 | Mitochondrial Rho GTPase 1                                              | Rho1t           | 2964 | 13 | 13 | 12 | 25.8  | 25.8  | 24.1  | 72.241 | 0.0000 | 73.893 | 11161000  | 118       | 15.05 | 15.34 | 13.09 | 15.06 | 15.33 | 14.88 | 15.53 | 14.41 |       |
| 1.149 | -0.53 | 0.69 | Q8B484 | Cytochrome b5 domain containing protein                                 | Coc3            | 3145 | 12 | 12 | 12 | 15.4  | 15.4  | 15.4  | 15.956 | 0.0000 | 8.959  | 3356800   | 27        | 14.08 | 14.62 | 13.29 | 14.21 | 14.72 | 15.76 | 14.58 | 15.30 |       |
| 0.256 | -0.53 | 0.69 | Q3H2E2 | Myosin regulatory light chain 12b:Myosin regulatory light polypeptide 9 | My12b:My9       | 1842 | 6  | 6  | 6  | 44.2  | 44.2  | 44.2  | 19.779 | 0.0000 | 96.621 | 13688000  | 75        | 16.02 | 17.22 | 13.47 | 15.25 | 15.92 | 16.35 | 15.17 | 16.63 |       |
| 0.400 | -0.53 | 0.69 | Q8BVV7 | COP9 signalosome complex subunit 8                                      | Cops8           | 3898 | 8  | 8  | 8  | 70.3  | 70.3  | 70.3  | 23.255 | 0.0000 | 35.57  | 56617000  | 128       | 18.44 | 18.26 | 16.23 | 18.79 | 18.34 | 18.84 | 18.32 | 18.54 |       |
| 1.341 | -0.53 | 0.69 | Q8K1E0 | Syntaxin-5                                                              | Sxt5            | 3625 | 11 | 11 | 11 | 44.2  | 44.2  | 44.2  | 39.713 | 0.0000 | 83.409 | 30866000  | 204       | 16.43 | 16.27 | 15.69 | 16.52 | 16.53 | 16.95 | 16.89 | 16.67 |       |
| 0.196 | -0.53 | 0.69 | Q84112 | Interferon-induced protein with tetratricopeptide repeats 2             | Itih2           | 2418 | 15 | 15 | 15 | 36.7  | 36.7  | 36.7  | 55.02  | 0.0000 | 298.33 | 22477000  | 141       | 14.45 | 12.66 | 13.31 | 14.34 | 12.89 | 12.54 | 16.25 | 15.71 |       |
| 0.961 | -0.53 | 0.69 | Q922H9 | Zinc finger protein 330                                                 | Znf330          | 4259 | 3  | 3  | 3  | 14.9  | 14.9  | 14.9  | 35.607 | 0.0000 | 33.445 | 2891700   | 64        | 14.39 | 13.91 | 13.52 | 14.24 | 14.71 | 15.02 | 14.10 | 14.36 |       |
| 0.587 | -0.54 | 0.69 | Q6ZQ58 | La-related protein 1                                                    | Larp1           | 2690 | 13 | 13 | 13 | 20    | 20    | 20    | 121.12 | 0.0000 | 72.931 | 8170900   | 76        | 14.47 | 14.69 | 15.96 | 14.57 | 15.66 | 15.61 | 15.90 | 14.66 |       |
| 0.372 | -0.54 | 0.69 | Q8CGP0 | Histone H2B type 3-B:Histone H2B type 3-A                               | Hist3b2b:Hist3a | 3510 | 18 | 2  | 0  | 79.4  | 7.9   | 0     | 13.908 | 0.0025 | 2.6282 | 3927700   | 23        | 13.51 | 14.19 | 13.13 | 12.77 | 15.38 | 13.01 | 13.15 | 14.20 |       |
| 0.656 | -0.54 | 0.69 | E5Q634 | Unconventional myosin-I                                                 | Myo1e           | 241  | 53 | 44 | 44 | 41.6  | 41.6  | 41.6  | 126.82 | 0.0000 | 313.77 | 78842000  | 573       | 16.01 | 15.57 | 17.56 | 16.86 | 16.86 | 17.11 | 17.27 | 17.29 |       |
| 1.958 | -0.54 | 0.69 | P80315 | T-complex protein 1 subunit delta                                       | Ccl4            | 1592 | 44 | 44 | 44 | 87.4  | 87.4  | 87.4  | 58.066 | 0.0000 | 323.31 | 761510000 | 2046      | 19.62 | 19.77 | 19.63 | 19.89 | 19.98 | 20.51 | 20.48 | 20.10 |       |
| 0.351 | -0.54 | 0.69 | P33215 | Protein NEDD1                                                           | Nedd1           | 1001 | 5  | 5  | 5  | 14.7  | 14.7  | 14.7  | 71.292 | 0.0000 | 32.41  | 6452100   | 79        | 14.79 | 14.60 | 12.35 | 15.00 | 14.48 | 14.98 | 15.24 | 14.20 |       |
| 0.839 | -0.54 | 0.69 | Q8DX80 | CD domain-containing protein 2-like                                     | C2cd2l          | 2973 | 5  | 5  | 5  | 10.9  | 10.9  | 10.9  | 76.944 | 0.0000 | 15.02  | 1705400   | 97        | 12.05 | 12.71 | 13.26 | 12.85 | 13.11 | 13.79 | 13.33 | 12.89 |       |
| 0.588 | -0.54 | 0.69 | P62274 | 40S ribosomal protein S26                                               | Rps29           | 1414 | 6  | 6  | 6  | 67.9  | 67.9  | 67.9  | 6.9767 | 0.0000 | 47.096 | 221640000 | 38        | 19.63 | 19.63 | 18.24 | 19.65 | 19.62 | 19.12 | 19.87 | 20.43 |       |
| 1.364 | -0.54 | 0.69 | P17182 | Alpha-enolase                                                           | Eno1            | 820  | 66 | 66 | 66 | 58    | 97.9  | 97.9  | 84.1   | 17.14  | 0.0000 | 323.31    | 870380000 | 9696  | 21.88 | 22.14 | 21.25 | 21.92 | 22.10 | 22.53 | 22.32 | 22.40 |
| 0.782 | -0.54 | 0.69 | Q8BFW7 | Lipoma-preferred partner homolog                                        | Lpp             | 2951 | 9  | 9  | 9  | 24.3  | 24.3  | 24.3  | 65.89  | 0.0000 | 106.76 | 15941000  | 172       | 15.77 | 15.86 | 14.55 | 14.88 | 15.77 | 16.10 | 15.79 | 15.56 |       |
| 0.294 | -0.54 | 0.69 | P20702 | 8S ribosomal protein S4, X isoform                                      | Rps18           | 1434 | 34 | 34 | 34 | 79.15 | 79.15 | 79.15 | 29.597 | 0.0000 | 323.31 | 690361000 | 1226      | 19.40 | 19.40 | 19.31 | 19.73 | 20.19 | 19.83 | 20.19 | 19.83 |       |
| 0.289 | -0.54 | 0.69 | P06602 | Non-histone chromosomal protein HMG-17                                  | Hmg2            | 700  | 5  | 5  | 5  | 60    | 60    | 60    | 9.4226 | 0.0000 | 25.991 | 1325500   | 20        | 11.87 | 13.22 | 13.94 | 14.55 | 14.52 | 13.12 | 15.14 | 12.97 |       |
| 0.231 | -0.54 | 0.69 | P35762 | CD81 antigen                                                            | Cd81            | 1032 | 1  | 1  | 1  | 8.5   | 8.5   | 8.5   | 25.814 | 0.0000 | 69.602 | 7115100   | 53        | 16.18 | 16.37 | 17.30 | 12.74 | 14.61 | 15.65 | 15.84 | 15.07 |       |
| 0.365 | -0.55 | 0.68 | Q80Y14 | Glutaredoxin-related protein 5, mitochondrial                           | Glnx5           | 2893 | 3  | 3  | 3  | 29.6  | 29.6  | 29.6  | 16.292 | 0.0000 | 9.865  | 4464700   | 52        | 15.10 | 14.99 | 14.93 | 12.82 | 14.47 | 16.01 | 14.88 | 14.65 |       |
| 0.523 | -0.55 | 0.68 | Q3JUM8 | Large subunit GTPase 1 homolog                                          | Gtp1            | 153  | 17 | 17 | 17 | 30.6  | 30.6  | 30.6  | 73.158 | 0.0000 | 91.325 | 14075000  | 178       | 15.51 | 15.78 | 15.20 | 15.51 | 15.74 | 15.78 | 15.86 | 15.33 |       |
| 0.272 | -0.55 | 0.68 | Q7TSC1 | Protein PRRC2A                                                          | Prcc2a          | 2780 | 5  | 4  | 4  | 3.4   | 3.4   | 3.4   | 22.9   | 0.0000 | 23.349 | 2409900   | 38        | 14.19 | 13.69 | 15.12 | 13.82 | 14.48 | 14.74 | 14.01 | 14.24 |       |
| 1.148 | -0.55 | 0.68 | Q8D8T7 | SRA stem-loop-interacting RNA-binding protein, mitochondrial            | Slirp           | 5074 | 8  | 8  | 8  | 68.8  | 68.8  | 68.8  | 12.605 | 0.0000 | 108.84 | 51728000  | 299       | 16.56 | 17.00 | 15.94 | 16.36 | 16.84 | 17.32 | 16.80 | 17.10 |       |
| 0.857 | -0.55 | 0.68 | Q55102 | Biogenesis of lysosome-related organelles complex 1 subunit 1           | Bloc1s1         | 453  | 6  | 6  | 6  | 74.4  | 74.4  | 74.4  | 14.281 | 0.0000 | 54.508 | 5956500   | 75        | 14.62 | 14.90 | 15.02 | 14.55 | 15.54 | 15.04 | 14.82 | 16.20 |       |
| 1.183 | -0.55 | 0.68 | Q2D682 | E3 ubiquitin-protein ligase CBL                                         | Cbl             | 276  | 13 | 13 | 13 | 27.2  | 27.2  | 27.2  | 10.56  | 0.0000 | 153.87 | 40444000  | 261       | 16.01 | 16.16 | 15.56 | 15.04 | 16.47 | 16.01 | 15.78 | 15.78 |       |
| 0.553 | -0.55 | 0.68 | Q8Z0L8 | Gamma-glutamyl hydrolase                                                | Ggh             | 5775 | 5  | 5  | 5  | 19.9  | 19.9  | 19.9  | 35.469 | 0.0000 | 15.865 | 43028000  | 97        | 16.92 | 16.27 | 17.37 | 16.21 | 17.58 | 17.58 | 18.25 | 17.57 |       |
| 1.073 | -0.55 | 0.68 | Q8Z2Y8 | Proline synthase co-transcribed bacterial homolog protein               | Prosc           | 5873 | 17 | 17 | 17 | 65    | 65    | 65    | 30.048 | 0.0000 | 126.8  | 135650000 | 463       | 18.06 | 18.35 | 17.34 | 18.12 | 18.38 | 18.97 | 18.32 | 18.41 |       |
| 0.536 | -0.55 | 0.68 | Q8VB84 | Nucleolar complex protein 3 homolog                                     | Noc3            | 4031 | 7  | 7  | 7  | 11.2  | 11.2  | 11.2  | 93.21  | 0.0000 | 8.5874 | 2278900   | 19        | 13.51 | 13.04 | 13.94 | 13.82 | 12.90 | 14.29 | 14.43 | 14.91 |       |
| 0.872 | -0.55 | 0.68 | Q8BX80 | Cytosolic endonuclease 54, X isoform                                    | C54paw          | 3269 | 6  | 6  | 6  | 10.1  | 10.1  | 10.1  | 82.944 | 0.0000 | 17.144 | 8956900   | 97        | 12.95 | 12.95 | 14.61 | 14.61 | 15.37 | 15.37 | 15.37 | 15.37 |       |
| 0.755 | -0.55 | 0.68 | Q8D1G5 | Leucine-rich repeat-containing protein 57                               | Lnc57           | 4913 | 10 | 10 | 10 | 55.2  | 55.2  | 55.2  | 26.76  | 0.0000 | 61.871 | 9374000   | 123       | 14.99 | 15.01 | 13.71 | 14.89 | 15.00 | 15.72 | 15.17 | 14.48 |       |
| 0.427 | -0.55 | 0.68 | Q3SX03 | HD domain-containing protein 2                                          | Hdc2            | 1810 | 3  | 3  | 3  | 20.1  | 20.1  | 20.1  | 22.753 | 0.0000 | 6.8891 | 1333100   | 15        | 12.50 | 11.47 | 14.21 | 12.89 | 13.18 | 13.57 | 13.42 | 13.10 |       |
| 1.535 | -0.55 | 0.68 | Q8Z1M8 | Protein Red                                                             | Ik              | 5814 | 19 | 19 | 19 | 42.4  | 42.4  | 42.4  | 65.615 | 0.0000 | 106.81 | 45252000  | 348       | 16.64 | 17.22 | 16.63 | 16.56 | 17.05 | 17.53 | 17.18 | 17.49 |       |
| 0.582 | -0.55 | 0.68 | Q8BFH4 | N-acetylglucosaminase kinase                                            | Gnkl2           | 473  | 12 | 12 | 12 | 47.7  | 47.7  | 47.7  | 29.174 | 0.0000 | 78.347 | 12633000  | 108       | 15.44 | 14.80 | 13.89 | 15.58 | 15.69 | 15.49 | 15.23 | 15.73 |       |
| 0.933 | -0.56 | 0.68 | Q9QXK7 | Cleavage and polyadenylation specificity factor subunit 3               | Cpsf3           | 5544 | 12 | 12 | 12 | 24.3  | 24.3  | 24.3  | 77.504 | 0.0000 | 90.465 | 19409000  | 85        | 16.34 | 16.08 | 16.14 | 16.11 | 15.97 | 17.18 | 17.22 | 16.51 |       |
| 0.854 | -0.56 | 0.68 | Q8BZT9 | Lactase domain-containing protein 1                                     | Lactc1          | 3319 | 6  | 6  | 6  | 23.5  | 23.5  | 23.5  | 47.514 | 0.0000 | 155.97 | 9121200   | 72        | 15.51 | 15.13 | 16.02 | 16.06 | 16.04 | 16.61 | 16.65 | 16.55 |       |
| 1.330 | -0.56 | 0.68 | Q9CQ19 | Transcription domain-containing protein 9                               | Txdn9           | 4571 | 5  | 5  | 5  | 31.4  | 31.4  | 31.4  | 26.259 | 0.0000 | 58.979 | 2219800   | 47        | 13.30 | 12.56 | 15.64 | 13.89 | 13.67 | 14.02 | 14.11 | 13.72 |       |
| 1.955 | -0.56 | 0.68 | Q5Q1J6 | Probable ATP-dependent RNA helicase DDX17                               | Ddx17           | 2075 | 48 | 36 | 36 | 54.8  | 44.3  | 44.3  | 72.399 | 0.0000 | 323.31 | 175520000 | 970       | 17.53 | 17.75 | 18.03 | 17.96 | 18.31 | 18.62 | 18.13 | 18.43 |       |
| 0.586 | -0.56 | 0.68 | Q8B878 | AN1-type zinc finger protein 5                                          | Zfand5          | 581  | 3  | 3  | 3  | 28.2  | 28.2  | 28.2  | 23.058 | 0.0000 | 14.116 | 1232100   | 31        | 12.57 | 12.64 | 12.34 | 12.27 |       |       |       |       |       |

|       |       |      |        |                                                                         |          |      |    |      |      |        |        |        |         |           |           |          |       |        |       |       |       |       |       |       |       |
|-------|-------|------|--------|-------------------------------------------------------------------------|----------|------|----|------|------|--------|--------|--------|---------|-----------|-----------|----------|-------|--------|-------|-------|-------|-------|-------|-------|-------|
| 0.725 | -0.60 | 0.66 | Q09J95 | Cyclin-dependent kinase 9                                               | Cdk9     | 4334 | 6  | 5    | 5    | 16.7   | 15.5   | 14.5   | 42.761  | 0.0000    | 20.327    | 4411200  | 72    | 14.23  | 14.38 | 12.97 | 14.03 | 14.30 | 15.22 | 14.48 | 14.40 |
| 0.223 | -0.60 | 0.66 | Q09PW4 | TP53-regulating kinase                                                  | Tp53rk   | 4520 | 3  | 3    | 3    | 17.2   | 17.2   | 17.2   | 27.393  | 0.0000    | 49.229    | 7606700  | 70    | 15.44  | 15.85 | 11.83 | 15.24 | 16.09 | 13.58 | 15.70 | 15.81 |
| 1.067 | -0.60 | 0.66 | Q08WU7 | Protein LYRIC                                                           | Mdh      | 2863 | 20 | 20   | 20   | 40.4   | 40.4   | 40.4   | 63.845  | 0.0000    | 323.31    | 95079000 | 620   | 16.97  | 16.94 | 18.14 | 17.14 | 17.75 | 18.04 | 18.00 | 17.39 |
| 2.332 | -0.60 | 0.66 | Q02Z08 | C-1-tetrahydrofolate synthase, cytoplasmic;Methylenetetrahydrofolate d  | Mhdt1    | 4251 | 66 | 66   | 66   | 76.3   | 75.2   | 101.2  | 0.0000  | 323.31    | 28676000  | 1555     | 17.35 | 17.53  | 17.42 | 17.65 | 17.73 | 18.19 | 18.23 | 18.21 |       |
| 1.421 | -0.61 | 0.66 | Q08G52 | Buik-like protein 2                                                     | Buik2    | 2967 | 7  | 7    | 7    | 13.9   | 13.9   | 13.9   | 24.338  | 0.0000    | 24.338    | 8532200  | 95    | 14.074 | 14.07 | 14.07 | 14.07 | 14.07 | 15.01 | 15.01 | 15.01 |
| 1.288 | -0.60 | 0.66 | Q08C52 | Microtubule-associated protein 1S;MAP1S heavy chain;MAP1S light ch      | Map1s    | 3325 | 26 | 26   | 26   | 31.8   | 31.8   | 102.94 | 0.0000  | 122.29    | 127530000 | 500      | 18.95 | 19.11  | 19.87 | 19.08 | 19.50 | 20.14 | 19.97 | 19.80 |       |
| 0.429 | -0.60 | 0.66 | Q04Q22 | GA-binding protein alpha chain                                          | Galpa    | 1696 | 2  | 2    | 2    | 7.5    | 7.5    | 51.344 | 0.0000  | 45.005    | 3786400   | 50       | 14.83 | 13.73  | 12.65 | 14.71 | 13.59 | 14.59 | 15.35 | 14.80 |       |
| 0.779 | -0.61 | 0.66 | Q0CJF7 | Protein ELYS                                                            | Ahctf1   | 3569 | 10 | 10   | 10   | 6.2    | 6.2    | 247.64 | 0.0000  | 12.647    | 2849500   | 25       | 12.57 | 13.17  | 13.25 | 13.99 | 13.28 | 14.37 | 13.80 | 14.16 |       |
| 1.067 | -0.61 | 0.66 | Q08G52 | Zinc finger protein 385A                                                | Znf385a  | 3935 | 12 | 12   | 12   | 35.5   | 35.5   | 40.446 | 0.0000  | 107.68    | 14107000  | 181      | 15.08 | 15.18  | 14.84 | 15.21 | 15.48 | 15.37 | 15.21 | 15.11 |       |
| 0.940 | -0.61 | 0.66 | Q08291 | DBRD complex subunit ZNF326                                             | Znf326   | 521  | 9  | 9    | 9    | 22.4   | 22.4   | 65.225 | 0.0000  | 190.91    | 15667000  | 140      | 15.86 | 15.78  | 14.05 | 15.56 | 15.71 | 16.36 | 15.92 | 15.69 |       |
| 0.462 | -0.61 | 0.66 | Q0CGP5 | Histone H2A type 1-F                                                    | HistH2af | 3512 | 18 | 5    | 1    | 80     | 28.5   | 14.161 | 0.0000  | 154.48    | 231170000 | 2259     | 22.49 | 22.56  | 22.99 | 22.04 | 23.53 | 22.39 | 23.09 | 23.51 |       |
| 0.697 | -0.61 | 0.65 | Q03538 | Interferon-activable protein 203                                        | Ih203    | 362  | 9  | 3    | 3    | 27.5   | 13     | 48.299 | 0.0002  | 5.878     | 1130200   | 12       | 13.29 | 12.85  | 13.84 | 14.21 | 13.88 | 13.62 | 15.02 | 14.13 |       |
| 1.067 | -0.62 | 0.65 | Q0C241 | U1 small nuclear ribonucleoprotein C                                    | Snrpc    | 3371 | 3  | 3    | 3    | 13.2   | 13.2   | 384    | 0.0000  | 41.887    | 7192500   | 44       | 12.98 | 16.26  | 15.16 | 15.88 | 15.21 | 16.32 | 15.81 | 16.11 |       |
| 1.190 | -0.62 | 0.65 | Q09K90 | TGF-beta-activated kinase 1 and MAP3K7-binding protein 2                | Tak2     | 4367 | 9  | 9    | 9    | 21.9   | 21.9   | 76.441 | 0.0000  | 38.613    | 8684100   | 97       | 14.59 | 15.08  | 14.09 | 14.89 | 14.59 | 15.12 | 15.76 | 15.11 |       |
| 0.814 | -0.62 | 0.65 | Q01YP3 | Deoxyribose-phosphate aldolase                                          | Dera     | 4171 | 12 | 12   | 12   | 52.8   | 52.8   | 34.975 | 0.0000  | 155.04    | 29859000  | 241      | 16.54 | 16.57  | 15.22 | 16.25 | 16.33 | 17.17 | 16.87 | 16.97 |       |
| 1.377 | -0.62 | 0.65 | P31230 | Aminoglycyl tRNA synthase complex-interacting multifunctional protein 1 | Aimp1    | 684  | 17 | 17   | 17   | 70.3   | 70.3   | 33.997 | 0.0000  | 286.25    | 58019000  | 483      | 16.26 | 16.81  | 16.92 | 16.17 | 17.24 | 17.44 | 16.74 | 17.23 |       |
| 0.253 | -0.62 | 0.65 | Q03G57 | Ribosome-recycling factor, mitochondrial                                | Mrrf     | 5008 | 6  | 6    | 6    | 46.2   | 46.2   | 29.05  | 0.0000  | 183.98    | 12519000  | 103      | 14.64 | 16.39  | 15.08 | 14.80 | 17.40 | 16.39 | 15.08 | 14.80 |       |
| 0.461 | -0.62 | 0.65 | Q05013 | Trafficking protein particle complex subunit 3                          | Trappc3  | 441  | 7  | 7    | 7    | 33.3   | 33.3   | 20.302 | 0.0000  | 16.325    | 15080000  | 124      | 15.52 | 16.17  | 13.48 | 15.54 | 16.11 | 15.69 | 16.00 | 15.41 |       |
| 0.533 | -0.62 | 0.65 | Q0CZK7 | Type 2 phosphatidylinositol 4,5-bisphosphate 4-phosphatase              | Tmem55a  | 4845 | 8  | 8    | 7    | 54.9   | 54.9   | 51     | 28.038  | 0.0000    | 117.5     | 33045000 | 117   | 17.17  | 16.45 | 15.51 | 15.89 | 17.18 | 17.09 | 17.52 | 15.71 |
| 0.844 | -0.62 | 0.65 | Q0VBL3 |                                                                         | Rbm15    | 1777 | 12 | 12   | 12   | 18.8   | 18.8   | 105.72 | 0.0000  | 51.813    | 12191000  | 86       | 14.79 | 15.18  | 14.82 | 15.69 | 15.00 | 16.30 | 16.17 | 15.48 |       |
| 0.223 | -0.62 | 0.65 | P33700 | Peroxiredoxin-1                                                         | Prx1     | 1029 | 33 | 21   | 99.5 | 99.5   | 22.176 | 0.0000 | 323.31  | 312650000 | 2868      | 22.41    | 22.55 | 20.93  | 22.20 | 23.07 | 22.70 | 22.66 | 22.54 |       |       |
| 0.234 | -0.62 | 0.65 | P56379 | 6.8 kDa mitochondrial proteolipid                                       | Mpl68    | 1281 | 2  | 2    | 34.5 | 34.5   | 6.6979 | 0.0009 | 3.7181  | 18471000  | 71        | 17.02    | 16.74 | 12.85  | 17.04 | 16.50 | 15.91 | 16.25 | 17.49 |       |       |
| 0.639 | -0.62 | 0.65 | P56183 | Ribosomal RNA processing protein 1 homolog A                            | Rpl1     | 1276 | 4  | 4    | 16.6 | 16.6   | 54.776 | 0.0000 | 21.957  | 1020500   | 20        | 12.03    | 11.94 | 13.46  | 12.79 | 12.41 | 13.76 | 13.00 | 13.54 |       |       |
| 0.523 | -0.62 | 0.65 | Q0VEH8 | Endoplasmic reticulum lectin 1                                          | Erlec1   | 4006 | 3  | 3    | 6.4  | 6.4    | 54.966 | 0.001  | 3.834   | 3276200   | 91        | 12.86    | 14.45 | 14.39  | 14.35 | 15.38 | 13.57 | 15.02 | 14.73 |       |       |
| 1.589 | -0.62 | 0.65 | Q09RL6 | UBX domain-containing protein 6                                         | Ubx6     | 5508 | 21 | 21   | 55.7 | 55.7   | 49.795 | 0.0000 | 79.579  | 68580800  | 304       | 17.52    | 17.07 | 17.79  | 17.44 | 17.60 | 18.01 | 18.13 | 18.01 |       |       |
| 2.204 | -0.63 | 0.65 | Q3UIA2 | Rho GTPase-activating protein 17                                        | Arhgap17 | 1979 | 36 | 36   | 54.1 | 54.1   | 92.201 | 0.0000 | 323.31  | 115160000 | 679       | 17.21    | 17.29 | 17.80  | 17.19 | 17.86 | 18.09 | 18.01 | 18.02 |       |       |
| 0.707 | -0.63 | 0.65 | Q08RL3 | RING finger protein 214                                                 | Rnf214   | 2948 | 6  | 6    | 6    | 13     | 13     | 73.624 | 0.0000  | 13.299    | 3157700   | 28       | 13.75 | 13.81  | 15.17 | 13.43 | 14.43 | 15.24 | 14.53 | 14.45 |       |
| 1.067 | -0.63 | 0.65 | P02030 | UBX domain-containing protein 1                                         | Ubx1     | 4409 | 16 | 16   | 77.1 | 77.1   | 14.865 | 0.0000 | 157.63  | 81850000  | 1007      | 20.66    | 21.10 | 19.60  | 20.47 | 20.52 | 21.75 | 21.52 | 21.72 |       |       |
| 0.458 | -0.63 | 0.65 | P18572 | Basigin                                                                 | Basg     | 437  | 4  | 4    | 12.9 | 12.9   | 42.444 | 0.0000 | 8.3718  | 3865000   | 4         | 14.09    | 14.82 | 12.82  | 13.85 | 14.35 | 15.18 | 13.29 | 15.28 |       |       |
| 0.993 | -0.63 | 0.65 | Q0Z2E2 | Methyl-CpG-binding domain protein 1                                     | Mbd1     | 5847 | 2  | 2    | 4.2  | 4.2    | 70.022 | 0.0000 | 7.1024  | 719460    | 6         | 12.47    | 13.30 | 13.60  | 13.14 | 13.32 | 14.19 | 14.08 | 13.44 |       |       |
| 1.205 | -0.63 | 0.65 | Q0Z2I8 | Succinyl-CoA ligase (GDP-forming) subunit beta, mitochondrial           | Suc2g    | 5556 | 20 | 20   | 50   | 51     | 51     | 46.839 | 0.0000  | 256.78    | 80761000  | 550      | 17.11 | 17.27  | 16.39 | 17.15 | 17.23 | 18.12 | 17.62 | 17.46 |       |
| 0.592 | -0.62 | 0.65 | Q04965 | ES ubiquitin-protein ligase RNF13                                       | Rnf13    | 4315 | 4  | 11.5 | 41.5 | 42.732 | 0.0000 | 18.104 | 3883300 | 37        | 13.59     | 14.42    | 12.55 | 13.83  | 14.69 | 15.37 | 15.18 | 14.59 | 14.69 |       |       |
| 0.639 | -0.63 | 0.65 | Q0WTV4 | Armanin                                                                 | Arman1   | 4038 | 5  | 5    | 27.2 | 27.2   | 33.429 | 0.0000 | 12.297  | 2570200   | 21        | 13.69    | 13.86 | 12.63  | 14.14 | 14.45 | 13.23 | 14.73 | 14.43 |       |       |
| 1.373 | -0.63 | 0.65 | Q0VB19 | Tether containing Ubx domain for GLUT4                                  | Asparc1  | 3896 | 20 | 20   | 20   | 41.6   | 41.6   | 59.795 | 0.0000  | 151.92    | 37279000  | 251      | 16.27 | 16.85  | 16.11 | 16.67 | 16.62 | 17.15 | 17.46 | 17.20 |       |
| 1.552 | -0.63 | 0.65 | Q0C0D5 | Elongation factor 1u GTP-binding domain-containing protein 1            | Ehuf1    | 3332 | 15 | 15   | 15   | 17.7   | 17.7   | 125.78 | 0.0000  | 59.071    | 15644000  | 169      | 14.51 | 14.44  | 15.22 | 14.68 | 14.97 | 15.53 | 15.50 | 15.36 |       |
| 1.607 | -0.63 | 0.65 | Q0VBL3 | Ribosomal L1 domain-containing protein 1                                | Rpl1     | 325  | 16 | 16   | 37.6 | 37.6   | 50.421 | 0.0000 | 226.52  | 35053000  | 173       | 16.98    | 16.44 | 14.47  | 17.31 | 16.33 | 16.44 | 17.31 | 17.29 |       |       |
| 1.180 | -0.63 | 0.64 | Q0BZA1 | Cyclin-dependent kinase 13                                              | Cdk13    | 2480 | 3  | 2    | 2    | 1.8    | 2.3    | 164.55 | 0.0000  | 46.912    | 1390700   | 58       | 13.45 | 13.32  | 13.46 | 13.53 | 14.31 | 14.32 | 13.24 | 14.42 |       |
| 1.007 | -0.63 | 0.64 | Q0ZQ73 | Cullin-associated NEDD8-dissociated protein 2                           | Cand2    | 2691 | 2  | 1    | 1    | 1      | 1.2    | 135.63 | 0.0004  | 4.9322    | 5886700   | 81       | 15.29 | 14.40  | 13.79 | 13.40 | 14.92 | 14.97 | 15.32 | 15.10 |       |
| 1.033 | -0.63 | 0.64 | Q3JUK4 | Protein FAM5F3                                                          | Fam5f3   | 1989 | 3  | 3    | 3    | 10.7   | 10.7   | 55.012 | 0.0000  | 63.221    | 1932000   | 40       | 13.43 | 13.31  | 14.53 | 13.33 | 14.18 | 14.25 | 14.62 | 14.08 |       |
| 0.429 | -0.63 | 0.64 | Q0XQX4 | Acetyl-coenzyme A synthetase, cytoplasmic                               | Acsa2    | 5541 | 8  | 8    | 16.4 | 16.4   | 78.861 | 0.0000 | 41.889  | 4237900   | 16        | 13.35    | 12.64 | 13.10  | 15.24 | 14.43 | 13.25 | 14.64 | 14.56 |       |       |
| 0.579 | -0.64 | 0.64 | Q0CQ48 | NuSc domain-containing protein 2                                        | Nudcd2   | 4560 | 5  | 5    | 5    | 40.8   | 40.8   | 17.66  | 0.0000  | 19.958    | 3700400   | 26       | 13.50 | 14.17  | 13.48 | 14.32 | 14.71 | 13.21 | 14.66 | 15.43 |       |
| 0.360 | -0.64 | 0.64 | Q0CY16 | 28S ribosomal protein S28, mitochondrial                                | Mps28    | 4777 | 5  | 5    | 5    | 32.8   | 32.8   | 20.52  | 0.0000  | 21.263    | 5654100   | 49       | 13.97 | 15.22  | 14.90 | 13.99 | 14.85 | 17.78 | 13.28 | 15.80 |       |
| 1.281 | -0.64 | 0.64 | Q09L47 | Hsc70-interacting protein                                               | Hsc70    | 4403 | 16 | 16   | 35.6 | 35.6   | 41.655 | 0.0000 | 69.11   | 69057000  | 323       | 17.11    | 17.43 | 16.69  | 17.38 | 17.14 | 16.07 | 17.25 | 16.18 |       |       |
| 0.537 | -0.64 | 0.64 | P03044 | Vesicle-associated membrane protein 2                                   | Vamp2    | 1485 | 6  | 1    | 1    | 44.8   | 13.8   | 12.691 | 0.0000  | 12.483    | 3853400   | 40       | 14.53 | 15.09  | 14.97 | 13.27 | 15.37 | 14.10 | 15.79 | 15.15 |       |
| 0.809 | -0.64 | 0.64 | Q07813 | Cullin-associated NEDD8-dissociated protein 2                           | Cand2    | 2691 | 2  | 1    | 1    | 1      | 1.2    | 135.63 | 0.0004  | 4.9322    | 5886700   | 81       | 15.29 | 14.40  | 13.79 | 13.40 | 14.92 | 14.97 | 15.32 | 15.10 |       |
| 1.650 | -0.64 | 0.64 | Q0Z2U1 | Ublu5 small nuclear ribonucleoprotein Prp3                              | Prp3     | 4278 | 24 | 24   | 24   | 41.9   | 41.9   | 77.454 | 0.0000  | 158.4     | 61318000  | 457      | 15.50 | 15.89  | 16.32 | 16.02 | 16.22 | 16.69 | 16.63 | 16.74 |       |
| 1.067 | -0.64 | 0.64 | Q0Z2X8 | Kelch-like ECR-associated protein 1                                     | Kelc1    | 5872 | 5  | 5    | 14.7 | 14.7   | 68.552 | 0.0000 | 12.119  | 3875400   | 40        | 14.42    | 14.03 | 12.41  | 13.24 | 14.55 | 13.25 | 14.65 | 14.10 |       |       |
| 1.886 | -0.64 | 0.64 | Q0P298 | 40S ribosomal protein S3                                                | Rps3     | 1467 | 36 | 36   | 36   | 93.8   | 93.8   | 26.674 | 0.0000  | 278.55    | 445340000 | 1176     | 19.60 | 19.54  | 18.91 | 19.27 | 20.07 | 19.95 | 19.71 | 20.14 |       |
| 0.451 | -0.64 | 0.64 | Q0SJO0 | CMRF35-like molecule 8                                                  | Cd300a   | 2657 | 6  | 6    | 6    | 18.6   | 18.6   | 35.629 | 0.0000  | 16.262    | 5320100   | 42       | 14.64 | 12.29  | 14.75 | 14.64 | 14.46 | 14.62 | 14.40 | 15.41 |       |
| 0.756 | -0.64 | 0.64 | P02743 | AP-2 complex subunit sigma                                              | Apa2     | 1439 | 5  | 5    | 5    | 27.5   | 27.5   | 17.018 | 0.0000  | 8.9396    | 10934000  | 106      | 14.89 | 16.17  | 15.04 | 15.61 | 16.35 | 16.28 | 15.17 | 16.47 |       |
| 0.847 | -0.64 | 0.64 | Q09M69 | Nucleolar GTP-binding protein 1                                         | Gtpab1   | 4464 | 15 | 15   | 24.8 | 24.8   | 74.112 | 0.0000 | 21.193  | 14642000  | 111       | 14.77    | 15.05 | 16.35  | 15.36 | 15.75 | 15.27 | 15.76 | 15.33 |       |       |

|       |       |      |         |                                                                         |         |       |    |    |    |      |      |        |        |        |         |            |      |       |       |       |       |       |       |       |       |
|-------|-------|------|---------|-------------------------------------------------------------------------|---------|-------|----|----|----|------|------|--------|--------|--------|---------|------------|------|-------|-------|-------|-------|-------|-------|-------|-------|
| 1.857 | -0.70 | 0.61 | P84228  | Histone H3.2                                                            | HistH3b | 1613  | 22 | 22 | 2  | 88.2 | 88.2 | 24.3   | 15.388 | 0.0000 | 323.31  | 2035400000 | 1151 | 22.18 | 22.40 | 22.89 | 22.96 | 23.36 | 23.35 | 23.07 | 23.44 |
| 0.456 | -0.70 | 0.61 | Q8K2H2  | OTU domain-containing protein 6B                                        | Oudb8   | 35697 | 8  | 8  | 32 | 32   | 32   | 32     | 33.758 | 0.0000 | 45.768  | 3704400    | 25   | 12.72 | 11.38 | 14.28 | 13.01 | 12.97 | 12.95 | 14.40 | 13.45 |
| 0.923 | -0.70 | 0.61 | Q9Q2H3  | Peptidyl-prolyl cis-trans isomerase E                                   | Ppde    | 35597 | 4  | 4  | 15 | 15   | 15   | 15     | 33.448 | 0.0004 | 4.5204  | 2006000    | 39   | 12.46 | 13.86 | 14.32 | 12.93 | 13.38 | 13.58 | 14.07 | 14.45 |
| 0.889 | -0.70 | 0.61 | P48771  | Cytochrome c oxidase subunit 7A2, mitochondrial                         | Cox7a2  | 1150  | 5  | 5  | 5  | 5    | 5    | 5      | 9.208  | 0.0000 | 117.3   | 2215500    | 131  | 15.57 | 16.64 | 15.97 | 16.84 | 16.44 | 17.41 | 16.54 | 17.44 |
| 1.055 | -0.70 | 0.61 | Q6A065  | Centriosomal protein of 170 kDa                                         | Cenp170 | 2469  | 17 | 17 | 18 | 18   | 18   | 18     | 17.05  | 0.0000 | 78.26   | 1265600    | 143  | 14.55 | 15.02 | 14.78 | 14.52 | 14.78 | 15.28 | 14.78 | 15.28 |
| 0.540 | -0.70 | 0.61 | Q9D975  | Sulfiredoxin-1                                                          | Srxn1   | 5069  | 5  | 5  | 5  | 5    | 5    | 5      | 50.7   | 0.0000 | 43.041  | 20051000   | 181  | 16.71 | 17.47 | 15.14 | 15.54 | 17.14 | 17.01 | 10.17 | 17.38 |
| 0.771 | -0.70 | 0.61 | Q9DB15  | 39S ribosomal protein L12, mitochondrial                                | Mrlp12  | 5118  | 9  | 9  | 9  | 30.7 | 30.7 | 30.7   | 21.708 | 0.0000 | 109.92  | 11908000   | 140  | 15.48 | 15.84 | 15.13 | 14.97 | 15.82 | 16.03 | 15.04 | 16.45 |
| 0.716 | -0.71 | 0.61 | Q8BVK9  | Sp110 nuclear body protein                                              | Sp110   | 3243  | 15 | 15 | 15 | 35.1 | 35.1 | 35.1   | 50.14  | 0.0000 | 141.87  | 2537900    | 218  | 16.54 | 16.04 | 18.01 | 16.84 | 17.06 | 17.26 | 17.87 | 18.07 |
| 0.71  | -0.71 | 0.61 | Q9VDV2  | UPF0428 protein (Ckorf6) homolog                                        | Upf4    | 3363  | 5  | 5  | 5  | 26.1 | 26.1 | 26.1   | 25.594 | 0.0000 | 10.416  | 4260200    | 66   | 14.45 | 15.94 | 14.40 | 14.63 | 14.80 | 15.38 | 15.71 | 15.71 |
| 0.570 | -0.71 | 0.61 | P84096  | Rho-related GTP-binding protein RhoG                                    | Rhog    | 1609  | 14 | 13 | 13 | 57.6 | 57.6 | 57.6   | 21.308 | 0.0000 | 256.77  | 33532000   | 573  | 19.39 | 19.18 | 17.11 | 19.59 | 19.39 | 19.74 | 19.32 | 19.65 |
| 1.000 | -0.71 | 0.61 | P26883  | Peptidyl-prolyl cis-trans isomerase FKBP1A                              | Fkbp1a  | 929   | 6  | 6  | 6  | 69.3 | 69.3 | 69.3   | 11.922 | 0.0000 | 33.674  | 3196000    | 137  | 16.85 | 18.14 | 18.20 | 17.09 | 18.10 | 18.49 | 18.10 | 18.49 |
| 0.314 | -0.71 | 0.61 | Q9D958  | Signal peptidase complex subunit 1                                      | Spoc1   | 5096  | 3  | 3  | 3  | 13   | 13   | 13     | 18.186 | 0.0000 | 18.236  | 6345200    | 52   | 16.31 | 15.99 | 14.92 | 12.19 | 15.61 | 16.06 | 15.13 | 15.45 |
| 1.484 | -0.71 | 0.61 | Q9VCE3  | Nucleoporin NUP210                                                      | Nup210  | 3917  | 8  | 8  | 8  | 21.2 | 21.2 | 21.2   | 75.409 | 0.0000 | 66.266  | 20863000   | 120  | 16.27 | 16.41 | 15.73 | 15.84 | 16.37 | 16.53 | 16.81 | 15.71 |
| 1.218 | -0.71 | 0.61 | Q7MTF3  | NADH dehydrogenase [ubiquinone] 1 alpha subcomplex subunit 12           | Ndufa12 | 2743  | 13 | 13 | 13 | 88.3 | 88.3 | 88.3   | 17.086 | 0.0000 | 80.009  | 64198000   | 360  | 16.88 | 17.41 | 17.11 | 17.55 | 17.22 | 17.76 | 18.45 | 18.25 |
| 0.817 | -0.72 | 0.61 | P83870  | PHD finger-like domain-containing protein 5A                            | Phf5a   | 1602  | 6  | 6  | 6  | 49.1 | 49.1 | 49.1   | 12.405 | 0.0000 | 23.853  | 15601000   | 166  | 14.82 | 15.27 | 13.60 | 15.25 | 15.37 | 15.79 | 15.72 | 14.98 |
| 0.716 | -0.72 | 0.61 | P58468  | Protein FAM207A                                                         | Fam207a | 1317  | 9  | 9  | 9  | 47   | 47   | 47     | 24.814 | 0.0000 | 20.39   | 1219700    | 76   | 14.43 | 15.03 | 15.56 | 14.89 | 14.74 | 16.29 | 15.19 | 16.53 |
| 0.951 | -0.72 | 0.61 | Q8KJL1  | NADH dehydrogenase [ubiquinone] iron-sulfur protein 8, mitochondrial    | Ndufs8  | 3703  | 12 | 12 | 12 | 45.8 | 45.8 | 45.8   | 24.038 | 0.0000 | 45.574  | 3218000    | 311  | 16.37 | 15.96 | 17.49 | 17.15 | 17.76 | 17.00 | 17.57 | 17.00 |
| 2.753 | -0.72 | 0.61 | A2AAAY5 | SH3 and PX domain-containing protein 2B                                 | Shp3x2b | 14    | 23 | 23 | 23 | 35.4 | 35.4 | 35.4   | 101.52 | 0.0000 | 121.06  | 65141000   | 562  | 15.85 | 16.05 | 16.08 | 16.07 | 16.43 | 16.92 | 16.63 | 16.95 |
| 0.434 | -0.72 | 0.61 | Q35972  | 39S ribosomal protein L23, mitochondrial                                | Mrlp23  | 416   | 7  | 7  | 7  | 47.9 | 47.9 | 47.9   | 17.121 | 0.0000 | 70.336  | 2371900    | 136  | 15.77 | 16.21 | 16.42 | 15.81 | 16.50 | 17.08 | 16.85 | 16.67 |
| 0.288 | -0.72 | 0.61 | P61514  | 60S ribosomal protein L37a                                              | Rpl37a  | 1386  | 8  | 8  | 8  | 73.9 | 73.9 | 73.9   | 10.275 | 0.0000 | 133.91  | 74001000   | 258  | 18.09 | 18.17 | 14.33 | 16.34 | 18.05 | 18.68 | 16.85 | 18.23 |
| 1.01  | -0.72 | 0.61 | Q9M4R3  | Solute carrier family 12 member 9                                       | Slc12a9 | 4473  | 7  | 7  | 7  | 12.1 | 12.1 | 12.1   | 98.329 | 0.0000 | 143.22  | 1732900    | 137  | 16.46 | 14.48 | 14.64 | 16.07 | 16.04 | 16.17 | 16.33 | 15.94 |
| 3.462 | -0.72 | 0.61 | P35922  | Fragile X mental retardation protein 1 homolog                          | Fmr1    | 1035  | 13 | 12 | 11 | 30.3 | 29.9 | 25.9   | 68.988 | 0.0000 | 13.818  | 13355000   | 185  | 14.99 | 15.20 | 15.14 | 14.98 | 15.70 | 15.95 | 15.62 | 15.94 |
| 0.981 | -0.72 | 0.61 | Q8B736  | 3-keto-steroid reductase                                                | Hsd17b7 | 563   | 4  | 4  | 4  | 21.3 | 21.3 | 21.3   | 37.316 | 0.0000 | 64.009  | 6168500    | 65   | 14.80 | 15.07 | 13.95 | 15.02 | 14.88 | 15.38 | 15.30 | 16.18 |
| 0.794 | -0.73 | 0.60 | Q3UQ98  | Protein YIPF3 (protein YIPF3, N-terminally processed                    | Yip3    | 1950  | 7  | 7  | 7  | 23.3 | 23.3 | 23.3   | 37.998 | 0.0000 | 28.135  | 7553900    | 43   | 14.93 | 15.18 | 13.37 | 14.86 | 15.16 | 15.08 | 15.90 | 15.05 |
| 1.012 | -0.73 | 0.60 | P53702  | Cytochrome c-type heme lyase                                            | Ctlh    | 1236  | 5  | 5  | 5  | 28.8 | 28.8 | 28.8   | 30.977 | 0.0000 | 20.965  | 3948300    | 47   | 14.97 | 13.39 | 14.30 | 13.66 | 14.99 | 13.38 | 15.25 | 14.31 |
| 1.168 | -0.73 | 0.60 | P60335  | Polycy(C)-binding protein 1                                             | Pcbp1   | 1354  | 23 | 23 | 17 | 94.1 | 94.1 | 82     | 37.497 | 0.0000 | 323.31  | 66458000   | 1379 | 20.14 | 20.29 | 19.00 | 20.19 | 20.34 | 20.04 | 20.67 | 20.58 |
| 0.724 | -0.73 | 0.60 | P50427  | Seryl-sulfatase                                                         | Sst     | 1180  | 18 | 18 | 18 | 31.1 | 31.1 | 31.1   | 66.59  | 0.0000 | 92.507  | 30256000   | 218  | 17.40 | 17.46 | 15.53 | 17.34 | 17.41 | 18.08 | 17.47 | 17.67 |
| 1.172 | -0.73 | 0.60 | Q9Q940  | General transcription factor IIF subunit 2                              | Gtf2i   | 3753  | 13 | 13 | 13 | 52.6 | 52.6 | 52.6   | 38.381 | 0.0000 | 215.02  | 69164000   | 383  | 19.09 | 19.11 | 17.24 | 16.99 | 17.45 | 17.78 | 17.79 | 17.78 |
| 2.668 | -0.73 | 0.60 | P63024  | Vesicle-associated membrane protein 3                                   | Vamp3   | 1480  | 8  | 8  | 3  | 67   | 67   | 32     | 11.48  | 0.0000 | 19.73   | 64605000   | 340  | 17.81 | 17.68 | 17.74 | 17.54 | 18.27 | 18.71 | 16.57 | 18.14 |
| 1.951 | -0.73 | 0.60 | P0C0A3  | Charged multivesicular body protein 6                                   | Ctm6p   | 704   | 6  | 6  | 6  | 29.5 | 29.5 | 29.5   | 23.415 | 0.0000 | 43.543  | 2163900    | 161  | 16.06 | 15.58 | 15.82 | 15.79 | 16.04 | 16.64 | 16.66 | 16.85 |
| 1.478 | -0.73 | 0.60 | Q8B991  | Neurabin-2                                                              | Ppp1r1b | 2654  | 15 | 15 | 15 | 30   | 30   | 30     | 89.519 | 0.0000 | 170.53  | 17114000   | 230  | 14.91 | 15.34 | 15.71 | 15.30 | 15.92 | 16.65 | 15.38 | 16.36 |
| 1.552 | -0.73 | 0.60 | Q92419  | Proteinophilin-42                                                       | Prophi  | 2368  | 25 | 25 | 25 | 58.2 | 58.2 | 58.2   | 41.518 | 0.0000 | 198.71  | 74163000   | 419  | 16.86 | 17.03 | 16.07 | 17.38 | 16.98 | 17.07 | 17.38 | 16.98 |
| 1.269 | -0.74 | 0.60 | Q9DCF9  | Translocin-associated protein subunit gamma                             | Sag1    | 5211  | 6  | 6  | 6  | 20.4 | 20.4 | 20.4   | 21.964 | 0.0000 | 215.16  | 37449000   | 108  | 17.64 | 17.96 | 17.09 | 16.98 | 18.37 | 18.31 | 16.19 | 17.93 |
| 0.738 | -0.74 | 0.60 | Q9CR27  | WASH complex subunit CDCDC5                                             | Cdc53   | 4662  | 5  | 5  | 3  | 35.1 | 35.1 | 22.7   | 21.092 | 0.0000 | 6.5824  | 6286400    | 34   | 15.38 | 12.02 | 16.19 | 15.49 | 15.50 | 15.48 | 15.63 | 15.42 |
| 0.798 | -0.74 | 0.60 | Q9VDC1  | FYVE and coiled-coil domain-containing protein 1                        | Fyoc1   | 3947  | 5  | 5  | 4  | 5.2  | 5.2  | 4.5    | 162.33 | 0.0000 | 38.132  | 2045400    | 37   | 13.37 | 13.44 | 12.39 | 13.75 | 13.50 | 13.27 | 14.71 | 14.37 |
| 1.53  | -0.74 | 0.60 | Q9JZ72  | COXIII domain-containing protein 10                                     | Coxm10  | 416   | 6  | 6  | 6  | 35.1 | 35.1 | 22.812 | 34.814 | 0.0000 | 122.170 | 1221700    | 171  | 12.85 | 17.44 | 14.21 | 15.66 | 15.46 | 15.44 | 15.69 | 15.69 |
| 1.395 | -0.74 | 0.60 | Q9QJH0  | Glutaredoxin-1                                                          | Glxr    | 5513  | 12 | 12 | 12 | 95.3 | 95.3 | 95.3   | 11.871 | 0.0000 | 323.31  | 11386000   | 359  | 18.34 | 16.90 | 19.01 | 17.94 | 18.93 | 19.23 | 19.45 | 19.54 |
| 0.329 | -0.74 | 0.60 | Q9CQV4  | Protein FAM134C                                                         | Fam134c | 4637  | 4  | 4  | 4  | 17.4 | 17.4 | 17.4   | 51.637 | 0.0000 | 65.233  | 1983600    | 115  | 16.57 | 16.40 | 12.88 | 16.69 | 16.45 | 16.69 | 16.80 | 15.57 |
| 1.942 | -0.74 | 0.60 | Q9JUK5  | Nucleolar RNA helicase 2                                                | Ddx12   | 5403  | 36 | 36 | 36 | 53.1 | 53.1 | 53.1   | 93.55  | 0.0000 | 189.68  | 7079000    | 635  | 16.07 | 16.20 | 16.90 | 16.49 | 17.00 | 17.34 | 16.99 | 17.31 |
| 0.794 | -0.74 | 0.60 | Q9JUK5  | Nucleolar RNA helicase 2                                                | Ddx12   | 5403  | 36 | 36 | 36 | 53.1 | 53.1 | 53.1   | 93.55  | 0.0000 | 189.68  | 7079000    | 635  | 16.07 | 16.20 | 16.90 | 16.49 | 17.00 | 17.34 | 16.99 | 17.31 |
| 0.997 | -0.75 | 0.59 | Q8R1T1  | Charged multivesicular body protein 7                                   | Ctm7p   | 3799  | 8  | 8  | 8  | 25.7 | 25.7 | 25.7   | 50.632 | 0.0000 | 67.12   | 7570000    | 93   | 14.41 | 14.31 | 12.92 | 13.85 | 14.24 | 15.12 | 14.64 | 14.50 |
| 2.186 | -0.75 | 0.59 | Q8K363  | ATP-dependent RNA helicase DDX18                                        | Ddx18   | 3692  | 13 | 13 | 13 | 27.1 | 27.1 | 27.1   | 74.18  | 0.0000 | 34.467  | 1252100    | 115  | 14.62 | 14.97 | 15.24 | 14.53 | 15.33 | 15.65 | 15.69 | 15.68 |
| 1.881 | -0.76 | 0.59 | Q8C163  | Nucleic acid EXOG, mitochondrial                                        | Exog    | 3354  | 14 | 14 | 13 | 50.8 | 50.8 | 50.8   | 41.383 | 0.0000 | 100.84  | 1487200    | 177  | 14.94 | 15.22 | 14.18 | 15.11 | 15.16 | 15.25 | 16.12 | 15.94 |
| 1.53  | -0.76 | 0.59 | P40830  | Transcription factor A, mitochondrial                                   | Taf12   | 1363  | 7  | 7  | 7  | 36.6 | 36.6 | 36.6   | 27.987 | 0.0000 | 50.005  | 4024200    | 86   | 13.87 | 14.51 | 14.10 | 14.34 | 14.80 | 15.15 | 14.44 | 15.47 |
| 0.962 | -0.76 | 0.59 | Q9MR11  | PERO amino acid-rich with GYF domain-containing protein 1               | Glyp11  | 4472  | 4  | 4  | 4  | 6.3  | 6.3  | 6.3    | 116.24 | 0.0000 | 17.48   | 3223800    | 33   | 14.05 | 14.55 | 14.17 | 13.52 | 14.09 | 15.72 | 14.60 | 14.90 |
| 1.024 | -0.76 | 0.59 | Q8R207  | Nbrin                                                                   | Nbrn    | 5668  | 4  | 4  | 4  | 6.7  | 6.7  | 6.7    | 83.794 | 0.0000 | 22.445  | 4888200    | 67   | 14.51 | 14.91 | 13.27 | 14.78 | 15.15 | 15.06 | 14.98 | 15.32 |
| 1.165 | -0.76 | 0.59 | Q9CQ03  | Succinate dehydrogenase [ubiquinone] iron-sulfur subunit, mitochondrial | Sdhb    | 4578  | 19 | 19 | 19 | 46.8 | 46.8 | 46.8   | 31.814 | 0.0000 | 97.322  | 13124000   | 571  | 17.54 | 16.99 | 18.16 | 17.85 | 18.46 | 17.73 | 18.85 | 18.55 |
| 0.792 | -0.76 | 0.59 | Q9JY20  | Protein THEM52                                                          | Them52  | 4153  | 19 | 19 | 19 | 45.2 | 45.2 | 45.2   | 74.377 | 0.0000 | 188.87  | 37820000   | 289  | 16.07 | 16.03 | 16.34 | 16.91 | 16.69 | 16.66 | 17.01 | 17.41 |
| 0.637 | -0.76 | 0.59 | P70406  | Mitochondrial uncoupling protein 2                                      | Ucp2    | 1568  | 2  | 2  | 2  | 14.2 | 14.2 | 14.2   | 33.373 | 0.0000 | 18.869  | 533210     | 11   | 11.49 | 13.63 | 12.50 | 12.64 | 13.03 |       |       |       |

|       |       |      |        |                                                                             |         |      |    |    |      |      |      |        |         |        |           |            |       |       |       |       |       |       |       |       |       |
|-------|-------|------|--------|-----------------------------------------------------------------------------|---------|------|----|----|------|------|------|--------|---------|--------|-----------|------------|-------|-------|-------|-------|-------|-------|-------|-------|-------|
| 0.509 | -0.83 | 0.56 | A2ASS6 | Titin                                                                       | Ttn     | 37   | 25 | 25 | 25   | 0.9  | 0.9  | 0.9    | 3906.4  | 0.0015 | 3.3944    | 10690000   | 136   | 17.48 | 17.87 | 19.49 | 16.13 | 18.98 | 19.10 | 17.99 | 18.21 |
| 3.114 | -0.83 | 0.56 | Q62523 | Zyxin                                                                       | Zyx     | 2401 | 9  | 9  | 9    | 27   | 27   | 27     | 60.545  | 0.0000 | 35.76     | 23305000   | 164   | 16.26 | 16.58 | 16.42 | 16.44 | 17.38 | 17.44 | 16.93 | 17.25 |
| 0.994 | -0.83 | 0.56 | Q922D4 | Serine/threonine-protein phosphatase 6 regulatory subunit 3                 | Ppp6r3  | 4250 | 4  | 4  | 4    | 6.8  | 6.8  | 6.8    | 94.652  | 0.0000 | 16.464    | 15790000   | 41    | 16.96 | 16.97 | 15.23 | 16.70 | 17.09 | 17.27 | 16.57 | 17.25 |
| 1.415 | -0.83 | 0.56 | Q9DBJ6 | NADH dehydrogenase [ubiquinone] flavoprotein 2, mitochondrial               | Ndufb2  | 4967 | 4  | 4  | 4    | 25.4 | 25.4 | 25.4   | 27.925  | 0.0000 | 27.903    | 2858600    | 39    | 12.95 | 13.97 | 13.71 | 14.06 | 14.38 | 14.12 | 14.50 | 15.01 |
| 1.543 | -0.83 | 0.56 | Q8BTY3 | Exosome complex component MTR3                                              | Exo68   | 3300 | 14 | 14 | 14   | 4.4  | 4.4  | 4.4    | 28.37   | 0.0000 | 159.82    | 15029000   | 132   | 16.04 | 15.91 | 15.28 | 15.96 | 15.82 | 15.91 | 15.92 | 16.18 |
| 0.953 | -0.83 | 0.56 | Q8CH25 | SABF-like transcription modulator                                           | Stim    | 3518 | 15 | 15 | 15   | 15   | 15.3 | 15.3   | 116.92  | 0.0000 | 42.657    | 21899000   | 178   | 15.25 | 15.93 | 17.25 | 15.83 | 16.55 | 17.01 | 16.81 | 17.22 |
| 1.423 | -0.83 | 0.56 | Q9CR00 | 26S proteasome non-ATPase regulatory subunit 16A                            | Panrd9  | 4653 | 8  | 8  | 7    | 45.5 | 45.5 | 38.7   | 24.72   | 0.0000 | 14.044    | 5821600    | 64    | 14.62 | 14.46 | 13.76 | 14.86 | 15.99 | 15.03 | 14.79 | 15.62 |
| 0.645 | -0.83 | 0.56 | Q9JGJ5 | Abhydrolase domain-containing protein 16A                                   | Abhd11a | 242  | 8  | 8  | 8    | 3.3  | 3.3  | 3.3    | 327.45  | 0.0000 | 23.852    | 15001000   | 42    | 14.81 | 16.12 | 13.56 | 16.10 | 15.75 | 15.99 | 16.17 | 16.02 |
| 0.301 | -0.83 | 0.56 | Q921Q2 | Abhydrolase domain-containing protein 16A                                   | Abhd11a | 5817 | 16 | 16 | 16   | 36   | 36   | 36     | 63.085  | 0.0000 | 83.362    | 19348000   | 178   | 14.70 | 14.42 | 13.97 | 14.98 | 14.98 | 14.72 | 16.76 | 17.20 |
| 2.274 | -0.84 | 0.56 | Q9DB83 | Splicing factor U2AF 35 kDa subunit                                         | U2af1   | 5054 | 14 | 14 | 10   | 56.9 | 56.9 | 49     | 27.815  | 0.0000 | 223.73    | 96165000   | 492   | 17.19 | 17.91 | 17.19 | 17.44 | 18.10 | 18.56 | 18.24 | 18.18 |
| 0.800 | -0.84 | 0.56 | Q3U308 | Cytoplasmic RNA 2-thiolation protein 2                                      | Cu2     | 1915 | 5  | 5  | 5    | 16   | 16   | 16     | 56.104  | 0.0000 | 36.117    | 14172000   | 73    | 16.79 | 16.26 | 13.76 | 16.08 | 16.28 | 16.67 | 16.78 | 16.53 |
| 0.779 | -0.84 | 0.56 | Q8BVF2 | Proscidin-like protein 3                                                    | Pdc3    | 3238 | 3  | 3  | 3    | 15   | 15   | 15     | 27.581  | 0.0000 | 12.659    | 5172000    | 33    | 14.58 | 13.53 | 15.34 | 15.94 | 15.39 | 15.93 | 15.60 | 15.83 |
| 1.389 | -0.84 | 0.56 | Q64671 | Spermidine synthase                                                         | Spm     | 2457 | 14 | 14 | 14   | 62.3 | 62.3 | 62.3   | 136.995 | 0.0000 | 190.92    | 31959000   | 221   | 17.01 | 16.98 | 14.70 | 16.15 | 16.15 | 16.98 | 16.77 | 17.20 |
| 0.869 | -0.84 | 0.56 | Q7O439 | Syntaxin-7                                                                  | Stx7    | 499  | 11 | 11 | 11   | 51.7 | 51.7 | 51.7   | 28.82   | 0.0000 | 247.03    | 124720000  | 406   | 18.45 | 18.22 | 16.42 | 18.31 | 18.47 | 18.91 | 18.66 | 18.72 |
| 1.607 | -0.84 | 0.56 | Q8CH18 | E1A-binding protein p400                                                    | Ep400   | 3524 | 10 | 10 | 10   | 5.1  | 5.1  | 5.1    | 337.18  | 0.0000 | 34.668    | 5846300    | 88    | 13.55 | 13.96 | 14.69 | 14.20 | 14.62 | 15.24 | 14.74 | 15.16 |
| 0.658 | -0.84 | 0.56 | Q9JGJ4 | E3 ubiquitin-protein ligase RING2                                           | Rnf2    | 4605 | 4  | 4  | 3    | 17   | 17   | 12.8   | 37.62   | 0.0000 | 13.064    | 4194400    | 41    | 13.75 | 14.80 | 12.19 | 14.56 | 14.91 | 14.41 | 15.02 | 14.33 |
| 1.002 | -0.85 | 0.56 | Q8BX17 | Gem-associated protein 5                                                    | Gemin5  | 3277 | 8  | 8  | 8    | 7.9  | 7.9  | 7.9    | 185.59  | 0.0000 | 34.591    | 11065000   | 69    | 15.03 | 15.64 | 13.97 | 15.83 | 15.65 | 15.96 | 16.14 | 16.10 |
| 1.328 | -0.85 | 0.56 | Q922Q1 | Mitochondrial aminoxime reducing component 2                                | Marc2   | 4267 | 16 | 16 | 16   | 54.4 | 54.4 | 54.4   | 38.194  | 0.0000 | 102.51    | 42624000   | 269   | 16.39 | 16.42 | 15.05 | 16.23 | 17.00 | 16.61 | 16.98 | 16.89 |
| 1.895 | -0.85 | 0.56 | Q14CH1 | Molybdenum cofactor sulfuryase                                              | Mocos   | 1789 | 32 | 32 | 32   | 54.9 | 54.9 | 54.9   | 95.012  | 0.0000 | 323.31    | 61334000   | 690   | 16.37 | 16.00 | 16.03 | 16.32 | 17.45 | 16.54 | 17.36 | 16.77 |
| 2.020 | -0.85 | 0.56 | Q9B238 | Pseudopodium-enriched atypical kinase 1                                     | Peak1   | 2479 | 18 | 18 | 18   | 14.8 | 14.8 | 14.8   | 191.09  | 0.0000 | 36.037    | 10029000   | 99    | 14.06 | 13.48 | 14.34 | 13.92 | 14.39 | 14.93 | 14.86 | 15.02 |
| 1.106 | -0.85 | 0.56 | Q8R4V4 | Stabilin-1                                                                  | Stab1   | 3876 | 21 | 21 | 21   | 10.6 | 10.6 | 10.6   | 276.25  | 0.0000 | 79.591    | 197107000  | 221   | 14.93 | 14.69 | 16.25 | 15.86 | 16.24 | 15.98 | 16.10 | 16.21 |
| 3.554 | -0.85 | 0.56 | Q5O508 | Serine/threonine-protein kinase 10                                          | SK10    | 450  | 44 | 41 | 41   | 14.3 | 14.3 | 41     | 11.19   | 0.0000 | 198.76    | 60888000   | 550   | 16.10 | 16.46 | 14.14 | 16.38 | 16.95 | 17.11 | 17.13 | 17.29 |
| 1.687 | -0.85 | 0.55 | P27661 | Histone H2AX                                                                | H2afx   | 939  | 21 | 21 | 8    | 81.1 | 81.1 | 47.6   | 15.42   | 0.0000 | 323.31    | 4640700000 | 2863  | 22.88 | 23.56 | 23.53 | 23.63 | 23.70 | 24.38 | 24.22 | 24.70 |
| 0.311 | -0.85 | 0.55 | A2A4P9 | ATP-dependent RNA helicase DHX8                                             | Dhx8    | 4604 | 6  | 6  | 6    | 2.9  | 2.9  | 8.3    | 142.57  | 0.0000 | 10.348    | 14607000   | 33    | 16.99 | 16.29 | 13.68 | 16.99 | 17.50 | 14.07 | 18.22 | 16.57 |
| 0.425 | -0.86 | 0.55 | B2RX14 | Terminal uridylyltransferase 4                                              | Zcchc11 | 83   | 6  | 6  | 6    | 4.7  | 4.7  | 4.7    | 184.65  | 0.0000 | 25.522    | 38402000   | 61    | 13.65 | 13.58 | 13.12 | 14.13 | 14.51 | 14.48 | 14.04 | 14.96 |
| 2.079 | -0.86 | 0.55 | Q7TPV4 | Myb-binding protein 1A                                                      | Mybbp1a | 2772 | 55 | 55 | 55   | 46.4 | 46.4 | 46.4   | 152.04  | 0.0000 | 323.31    | 142510000  | 1255  | 16.73 | 16.85 | 17.34 | 17.44 | 17.58 | 17.95 | 18.08 | 18.28 |
| 0.456 | -0.86 | 0.55 | P70296 | Phosphatidylethanolamine-binding protein 1:Hippocampal cholinergic receptor | Mepp1   | 1549 | 9  | 9  | 9    | 85.6 | 85.6 | 85.6   | 20.83   | 0.0000 | 116.53    | 34555000   | 173   | 17.17 | 18.37 | 13.74 | 15.99 | 17.05 | 17.41 | 17.11 | 17.51 |
| 2.203 | -0.86 | 0.55 | P71751 | Pyruvate dehydrogenase E1 component                                         | Pgi1    | 833  | 34 | 34 | 34   | 93.2 | 93.2 | 73.1   | 61.48   | 0.0000 | 323.31    | 1546800000 | 2082  | 21.04 | 21.81 | 15.53 | 20.76 | 21.68 | 21.91 | 21.09 | 21.51 |
| 2.119 | -0.87 | 0.55 | Q8Q2T1 | Acetyl-CoA acetyltransferase, mitochondrial                                 | Acac1   | 3735 | 31 | 31 | 31   | 72.4 | 72.4 | 72.4   | 44.816  | 0.0000 | 323.31    | 264330000  | 981   | 18.34 | 18.89 | 18.22 | 18.57 | 18.96 | 19.75 | 19.38 | 19.39 |
| 1.429 | -0.87 | 0.55 | Q61191 | Host cell factor 1:HCf N-terminal chain 2:HCf IHCf1                         | Hcf1    | 2272 | 38 | 38 | 27.3 | 27.3 | 27.3 | 210.43 | 0.0000  | 286.01 | 103050000 | 694        | 16.88 | 17.26 | 16.17 | 17.53 | 17.52 | 18.18 | 17.81 | 17.81 |       |
| 0.899 | -0.87 | 0.55 | P50543 | Protein S100-A11                                                            | S100a11 | 1186 | 5  | 5  | 5    | 51   | 51   | 51     | 11.083  | 0.0000 | 72.168    | 35048000   | 216   | 17.08 | 17.19 | 16.48 | 16.02 | 17.85 | 17.61 | 16.43 | 18.34 |
| 2.713 | -0.87 | 0.55 | Q9E922 | Endonuclease-containing protein 4                                           | Endo4   | 5283 | 43 | 39 | 35   | 91.1 | 91.1 | 73.1   | 61.48   | 0.0000 | 323.31    | 558670000  | 1342  | 19.82 | 19.99 | 18.31 | 18.81 | 19.49 | 19.99 | 20.28 | 20.28 |
| 0.483 | -0.87 | 0.55 | Q8R0J7 | Vacuolar protein sorting-associated protein 37B                             | Vps37b  | 3761 | 2  | 2  | 2    | 10.2 | 10.2 | 10.2   | 31.055  | 0.0000 | 23.282    | 40949000   | 2     | 12.02 | 15.34 | 13.71 | 15.07 | 15.28 | 15.17 | 15.18 | 15.99 |
| 0.739 | -0.87 | 0.55 | Q8VDV8 | MIT domain-containing protein 1                                             | Mitd1   | 3974 | 3  | 3  | 3    | 17.3 | 17.3 | 17.3   | 28.847  | 0.0000 | 9.5053    | 1761100    | 24    | 13.70 | 12.63 | 13.05 | 13.40 | 15.57 | 14.05 | 13.25 | 13.40 |
| 1.462 | -0.87 | 0.55 | Q9YCD5 | Mediator of RNA polymerase II transcription subunit 17                      | Med17   | 3916 | 4  | 4  | 4    | 12.6 | 12.6 | 12.6   | 72.461  | 0.0000 | 29.518    | 10548000   | 30    | 13.35 | 13.00 | 13.33 | 12.94 | 13.75 | 14.76 | 13.37 | 14.22 |
| 2.203 | -0.88 | 0.55 | P94909 | 60S ribosomal protein L19                                                   | L19     | 551  | 19 | 19 | 19   | 56.1 | 56.1 | 56.1   | 14.496  | 0.0000 | 155.11    | 316280000  | 752   | 21.00 | 20.21 | 20.24 | 20.32 | 21.00 | 20.81 | 21.09 | 21.51 |
| 1.133 | -0.88 | 0.55 | Q61193 | Rail guanine nucleotide dissociation stimulator-like 2                      | Rgl2    | 2273 | 11 | 11 | 11   | 23.4 | 23.4 | 23.4   | 83.825  | 0.0000 | 60.963    | 9141300    | 76    | 14.40 | 15.03 | 16.12 | 15.48 | 16.00 | 15.79 | 16.10 | 16.63 |
| 0.495 | -0.88 | 0.54 | Q8BHJ5 | Engulfment and cell motility protein 2                                      | Elmo2   | 3045 | 23 | 17 | 17   | 42.2 | 42.2 | 38.1   | 83.886  | 0.0000 | 138.62    | 24623000   | 218   | 16.17 | 15.87 | 13.06 | 15.46 | 16.20 | 16.68 | 16.30 | 15.96 |
| 2.350 | -0.88 | 0.54 | Q9ERR7 | 15 kDa selenoprotein                                                        | 42248   | 5316 | 6  | 6  | 6    | 30.2 | 30.2 | 30.2   | 17.808  | 0.0000 | 71.215    | 13516000   | 108   | 15.96 | 16.14 | 16.27 | 16.14 | 16.72 | 17.54 | 16.78 | 16.98 |
| 0.425 | -0.88 | 0.54 | Q9JGJ2 | Endonuclease-containing protein 4                                           | Endo4   | 5283 | 43 | 39 | 35   | 91.1 | 91.1 | 73.1   | 61.48   | 0.0000 | 323.31    | 558670000  | 1342  | 19.82 | 19.99 | 18.31 | 18.81 | 19.49 | 19.99 | 20.28 | 20.28 |
| 0.630 | -0.88 | 0.54 | Q9JUK1 | UPF0160 protein MYG1, mitochondrial                                         | Myg1    | 5445 | 14 | 14 | 14   | 46.1 | 46.1 | 46.1   | 42.722  | 0.0000 | 80.81     | 66371000   | 296   | 17.24 | 17.07 | 14.63 | 17.48 | 17.35 | 17.44 | 17.62 | 17.54 |
| 1.202 | -0.88 | 0.54 | Q8R035 | Peptidyl-RNA hydrolase ICT1, mitochondrial                                  | Ict1    | 3745 | 9  | 9  | 9    | 55.3 | 55.3 | 55.3   | 24.477  | 0.0000 | 46.432    | 18715000   | 157   | 15.99 | 15.82 | 15.02 | 14.27 | 15.62 | 16.32 | 15.92 | 16.37 |
| 2.013 | -0.89 | 0.54 | Q60872 | Eukaryotic translation initiation factor 1A                                 | Eif1a   | 2218 | 11 | 11 | 2    | 61.8 | 61.8 | 7.6    | 16.502  | 0.0000 | 176.94    | 57202000   | 280   | 16.80 | 17.57 | 16.93 | 17.32 | 17.98 | 18.39 | 17.64 | 18.16 |
| 1.453 | -0.89 | 0.54 | Q8BVJ4 | Nucleoside protein homologue 1                                              | Nhp1    | 408  | 6  | 6  | 6    | 16.9 | 16.9 | 16.9   | 53.133  | 0.0000 | 36.132    | 40595000   | 67    | 14.66 | 14.42 | 13.45 | 13.84 | 14.68 | 15.37 | 15.13 | 14.59 |
| 2.209 | -0.89 | 0.54 | P27546 | Microtubule-associated protein 4                                            | Map4    | 934  | 18 | 18 | 18   | 26   | 26   | 26     | 117.43  | 0.0000 | 119.31    | 27982000   | 300   | 15.41 | 16.10 | 16.01 | 15.37 | 16.45 | 16.89 | 16.60 | 16.50 |
| 0.419 | -0.89 | 0.54 | Q60953 | Protein PML                                                                 | Pml     | 2227 | 10 | 10 | 10   | 16.5 | 16.5 | 16.5   | 98.241  | 0.0000 | 57.576    | 3143600    | 35    | 10.22 | 12.62 | 13.89 | 13.56 | 12.46 | 13.32 | 14.64 | 13.43 |
| 0.835 | -0.89 | 0.54 | Q68952 | Protein lin-7 homolog C                                                     | Lin7c   | 587  | 7  | 7  | 7    | 39.6 | 39.6 | 39.6   | 21.834  | 0.0000 | 14.873    | 10012000   | 125   | 15.15 | 15.88 | 16.25 | 15.03 | 16.27 | 17.14 | 15.28 | 17.19 |
| 1.11  | -0.89 | 0.54 | Q9PVS9 | Mediator of DNA damage checkpoint protein 1                                 | Mdc1    | 2124 | 7  | 7  | 7    | 3.7  | 3.7  | 3.7    | 184.67  | 0.0000 | 4.209     | 1209000    | 23    | 11.06 | 12.38 | 12.56 | 11.68 | 12.38 | 12.56 | 12.56 | 12.93 |
| 1.108 | -0.90 | 0.54 | Q7O591 | Prefoldin subunit 2                                                         | Pfn2    | 217  | 3  | 3  | 3    | 22.7 | 22.7 | 22.7   | 16.534  | 0.0000 | 57.829    | 47880000   | 36    | 13.30 | 14.45 | 14.85 | 13.55 | 14.85 |       |       |       |

|       |       |               |                                                                            |               |       |    |    |      |       |        |        |         |         |          |           |       |       |       |       |       |       |       |       |       |
|-------|-------|---------------|----------------------------------------------------------------------------|---------------|-------|----|----|------|-------|--------|--------|---------|---------|----------|-----------|-------|-------|-------|-------|-------|-------|-------|-------|-------|
| 1.266 | -0.98 | 0.51 Q8JZU0   | Nucleoside diphosphate-linked moiety X motif 13                            | Nudt13        | 3582  | 3  | 3  | 3    | 14.8  | 14.8   | 14.8   | 39.136  | 0.0000  | 13.881   | 1484600   | 21    | 13.68 | 12.29 | 13.36 | 14.01 | 14.59 | 14.20 | 13.89 | 14.58 |
| 1.453 | -0.98 | 0.51 Q8QCH7   | Transcription factor BTF3 homolog 4                                        | Btf34         | 4600  | 7  | 6  | 6    | 59.5  | 55.7   | 55.7   | 17.27   | 0.0000  | 99.129   | 23621000  | 213   | 15.91 | 16.77 | 16.34 | 15.73 | 17.19 | 17.70 | 16.40 | 17.41 |
| 1.501 | -0.98 | 0.51 P49769   | Presenilin-1/Presenilin-1 NTF subunit;Presenilin-1 CTF subunit;Presenilin1 | Mps8          | 1171  | 5  | 5  | 3    | 19.1  | 19.1   | 11.6   | 52.639  | 0.0000  | 21.104   | 8806200   | 72    | 16.01 | 16.39 | 12.60 | 15.83 | 15.60 | 16.71 | 16.29 | 16.36 |
| 0.769 | -0.99 | 0.50 P51437   | Cathein-related antimicrobial peptide                                      | Camp          | 1196  | 3  | 3  | 21.5 | 21.5  | 21.5   | 19.453 | 0.0000  | 104.06  | 9487700  | 66        | 15.25 | 15.09 | 14.78 | 15.41 | 16.64 | 16.91 | 15.83 | 14.19 |       |
| 1.478 | -0.99 | 0.50 Q8Q890   | Protein SMOG1                                                              | Smog1         | 5193  | 5  | 5  | 14.4 | 14.4  | 14.4   | 51.762 | 0.0000  | 31.101  | 6426200  | 63        | 15.02 | 15.23 | 15.62 | 15.86 | 15.84 | 15.92 | 15.96 | 15.96 |       |
| 0.816 | -0.99 | 0.50 Q8QW76   | Probable ATP-dependent RNA helicase DDX28                                  | Ddx28         | 5133  | 30 | 10 | 10   | 9     | 25     | 23.5   | 59.514  | 0.0000  | 36.596   | 12547000  | 103   | 15.07 | 14.82 | 16.28 | 16.08 | 16.63 | 17.94 | 16.81 | 15.23 |
| 1.341 | -0.99 | 0.50 P30681   | High mobility group protein B2                                             | Hmgb2         | 980   | 29 | 29 | 21   | 69.5  | 69.5   | 48.6   | 24.162  | 0.0000  | 212.88   | 32591000  | 761   | 18.81 | 19.75 | 18.01 | 19.21 | 20.32 | 19.68 | 19.74 | 19.99 |
| 2.383 | -0.99 | 0.50 Q8QRN1   | Nucleolar protein 14                                                       | Nop14         | 3851  | 14 | 14 | 14   | 20.3  | 20.3   | 20.3   | 98.768  | 0.0000  | 50.521   | 15033000  | 178   | 15.32 | 15.20 | 15.90 | 15.53 | 16.21 | 16.54 | 16.26 | 16.90 |
| 1.761 | -0.99 | 0.50 Q8BFF9   | Zinc finger protein 787                                                    | Znf787        | 4047  | 5  | 5  | 16   | 16    | 16     | 40.477 | 0.0000  | 3.1149  | 1636700  | 17        | 12.67 | 13.24 | 12.96 | 13.34 | 12.47 | 13.34 | 12.55 | 14.27 |       |
| 2.913 | -0.99 | 0.50 Q8RLX0   | Protein deglycase DJ-1                                                     | Park7         | 3448  | 19 | 19 | 19   | 95.2  | 95.2   | 95.2   | 20.021  | 0.0000  | 306.51   | 181220000 | 865   | 17.64 | 18.43 | 17.78 | 17.87 | 18.57 | 19.35 | 18.59 | 19.18 |
| 0.913 | -0.99 | 0.50 Q54918   | Bcl-2-like protein 11                                                      | Bcl2l11       | 433   | 4  | 4  | 20.4 | 20.4  | 20.4   | 22.066 | 0.0000  | 7.0722  | 6471200  | 80        | 15.09 | 14.68 | 12.61 | 14.35 | 14.97 | 15.24 | 15.32 | 15.16 |       |
| 2.835 | -0.99 | 0.50 Q8JMD0   | UBU3-interacting and GLEBS motif-containing protein ZNF207                 | Znf207        | 5506  | 5  | 5  | 7.7  | 7.7   | 7.7    | 32.792 | 0.0000  | 11.623  | 14948000 | 86        | 15.45 | 15.49 | 14.94 | 15.41 | 16.33 | 16.42 | 15.96 | 16.37 |       |
| 1.479 | -0.99 | 0.50 P63299   | Actin, cytoplasmic 2;Actin, cytoplasmic 2, N-terminally processed          | Actg1         | 1489  | 5  | 5  | 99.5 | 99.5  | 7.5    | 47.792 | 0.0000  | 312.15  | 46731000 | 571       | 21.26 | 21.43 | 15.34 | 15.32 | 21.96 | 22.29 | 22.43 | 21.99 |       |
| 1.182 | -1.00 | 0.50 Q9D1N9   | 39S ribosomal protein L21, mitochondrial                                   | Mrp21         | 14928 | 6  | 6  | 6    | 40.2  | 40.2   | 23.366 | 0.0000  | 9.825   | 7254300  | 74        | 14.25 | 14.98 | 14.34 | 13.52 | 15.67 | 16.86 | 15.54 | 15.50 |       |
| 1.272 | -1.00 | 0.50 Q9Z1P6   | NADH dehydrogenase [ubiquinone] 1 alpha subcomplex subunit 7               | Ndufa7        | 5816  | 9  | 9  | 78.8 | 78.8  | 78.8   | 12.575 | 0.0000  | 41.344  | 71028000 | 218       | 16.57 | 17.54 | 17.70 | 16.62 | 17.32 | 18.56 | 18.01 | 18.54 |       |
| 0.883 | -1.00 | 0.50 Q8A105   | Sepiapterin reductase                                                      | Spr1          | 2417  | 12 | 12 | 94   | 54    | 54     | 27.883 | 0.0000  | 132.96  | 10610000 | 523       | 13.48 | 14.86 | 15.91 | 17.32 | 16.39 | 15.81 | 18.38 | 18.45 |       |
| 1.139 | -1.00 | 0.50 P58376   | Acylphosphatase-1                                                          | Acy1          | 1280  | 4  | 4  | 52.5 | 52.5  | 11.241 | 0.0000 | 13.297  | 5617800 | 58       | 15.04     | 15.20 | 13.41 | 15.21 | 15.04 | 15.26 | 15.88 | 15.74 | 15.94 |       |
| 3.287 | -1.00 | 0.50 Q8K194   | UAIUE.U5 small nuclear ribonucleoprotein 27 kDa protein                    | Snrnp27       | 3619  | 8  | 8  | 39.4 | 39.4  | 39.4   | 18.885 | 0.0000  | 35.748  | 19824000 | 114       | 15.80 | 16.25 | 15.63 | 15.78 | 16.77 | 16.86 | 16.77 | 17.04 |       |
| 1.366 | -1.00 | 0.50 E1UBD0   | Protein SOGA1;N-terminal form;C-terminal 80 kDa form                       | Soga1         | 217   | 13 | 13 | 13.8 | 13.8  | 13.8   | 19.18  | 0.0000  | 85.544  | 5020500  | 63        | 13.39 | 12.90 | 13.08 | 13.62 | 13.83 | 14.71 | 14.79 | 13.68 |       |
| 3.735 | -1.00 | 0.50 P62983P2 | Ubiquitin-40S ribosomal protein S27a;Ubiquitin-40S ribosomal protein S     | Rps27a;RPS27A | 1474  | 20 | 20 | 7    | 82.1  | 82.1   | 35.9   | 17.951  | 0.0000  | 323.31   | 102210000 | 1528  | 20.95 | 21.47 | 20.78 | 21.19 | 22.15 | 21.99 | 22.01 | 22.26 |
| 1.023 | -1.00 | 0.50 Q8QK01   | Importin-13                                                                | Importin13    | 3601  | 5  | 5  | 7.8  | 7.8   | 108.23 | 0.0000 | 24.911  | 3630100 | 55       | 14.83     | 12.86 | 13.08 | 14.56 | 14.76 | 15.02 | 14.72 | 14.74 | 14.72 |       |
| 1.038 | -1.01 | 0.50 P62267   | 40S ribosomal protein S23                                                  | Rps23         | 1412  | 16 | 16 | 16   | 70.6  | 70.6   | 70.6   | 15.807  | 0.0000  | 121.65   | 20188000  | 440   | 19.15 | 19.46 | 17.67 | 19.55 | 20.55 | 19.92 | 19.31 | 20.27 |
| 1.576 | -1.01 | 0.50 Q8VE99   | Coiled-coil domain-containing protein 115                                  | Ccdc115       | 3996  | 14 | 14 | 14   | 81.1  | 81.1   | 81.1   | 19.742  | 0.0000  | 119.72   | 52912000  | 341   | 16.26 | 17.14 | 15.95 | 16.42 | 17.09 | 17.95 | 17.01 | 17.76 |
| 1.510 | -1.01 | 0.50 P58404   | Striatin-4                                                                 | Striat4       | 1315  | 8  | 5  | 5    | 12.9  | 10.1   | 50.1   | 81.644  | 0.0000  | 12.975   | 2985900   | 48    | 12.92 | 14.39 | 12.74 | 13.74 | 14.57 | 14.37 | 15.09 | 14.35 |
| 0.933 | -1.01 | 0.50 P35979   | 60S ribosomal protein L12                                                  | Rpl12         | 1037  | 17 | 17 | 83   | 83    | 83     | 17.804 | 0.0000  | 323.31  | 30476000 | 838       | 19.30 | 19.54 | 17.10 | 17.80 | 19.63 | 19.72 | 19.73 | 19.58 |       |
| 1.853 | -1.01 | 0.50 Q8DXL7   | Metallophosphatase 1                                                       | Mppe1         | 2886  | 1  | 1  | 1    | 4     | 4      | 46.012 | 0.0002  | 5.3276  | 1058000  | 13        | 12.73 | 12.91 | 13.58 | 12.88 | 13.71 | 14.28 | 13.60 | 14.54 |       |
| 1.330 | -1.01 | 0.50 P58084   | 28S ribosomal protein S6, mitochondrial                                    | Mps8          | 1307  | 8  | 8  | 8    | 69.6  | 69.6   | 69.6   | 14.38   | 0.0000  | 13.847   | 4045600   | 56    | 14.37 | 13.14 | 13.86 | 12.97 | 14.33 | 14.84 | 14.07 | 15.15 |
| 1.441 | -1.01 | 0.50 Q8Q8J3   | Double-stranded RNA-specific adenosine deaminase                           | Adad3         | 3474  | 34 | 34 | 30   | 34.4  | 34.4   | 34.4   | 136.45  | 0.0000  | 222.66   | 29708000  | 289   | 14.91 | 14.96 | 15.36 | 15.45 | 15.59 | 15.79 | 15.80 | 15.49 |
| 1.016 | -1.01 | 0.50 Q8QVJ3   | DnaJ homolog subfamily B member 1                                          | Dnaj1         | 5576  | 8  | 8  | 7    | 28.2  | 28.2   | 28.2   | 38.167  | 0.0000  | 36.573   | 15276000  | 118   | 15.45 | 15.59 | 13.66 | 15.74 | 15.65 | 16.43 | 16.11 | 16.29 |
| 1.130 | -1.01 | 0.50 P35601   | Replication factor C subunit 1                                             | Rfc1          | 1028  | 9  | 9  | 12.4 | 12.4  | 12.4   | 125.98 | 0.0000  | 27.05   | 4598800  | 55        | 13.17 | 13.75 | 14.40 | 14.32 | 13.82 | 15.45 | 15.30 | 15.12 |       |
| 2.240 | -1.02 | 0.49 Q8DB96   | Neurodin                                                                   | Ngdn          | 5135  | 6  | 6  | 6    | 31.1  | 31.1   | 31.1   | 35.658  | 0.0000  | 42.289   | 10529000  | 113   | 15.17 | 15.63 | 14.71 | 14.77 | 15.84 | 16.34 | 15.95 | 16.23 |
| 1.134 | -1.02 | 0.49 P97370   | DNA-directed RNA polymerase I and III subunit RPAC2                        | Rp12          | 16174 | 22 | 22 | 2    | 161.7 | 161.7  | 161.7  | 15.0723 | 0.0000  | 4.2025   | 23671000  | 20    | 14.51 | 14.20 | 13.80 | 13.27 | 15.08 | 14.61 | 14.60 | 15.35 |
| 1.559 | -1.02 | 0.49 Q8VHR5   | Transcriptional repressor p66-beta                                         | Gatad2b       | 4619  | 22 | 22 | 22   | 46.5  | 46.5   | 46.5   | 15.072  | 0.0000  | 5.8867   | 10577000  | 407   | 16.21 | 16.98 | 15.49 | 16.41 | 16.98 | 17.71 | 17.04 | 17.45 |
| 1.151 | -1.02 | 0.49 Q4QRL3   | Coiled-coil domain-containing protein 88B                                  | Ccdc88b       | 2065  | 64 | 64 | 64   | 48.8  | 48.8   | 48.8   | 166.61  | 0.0000  | 246.32   | 84677000  | 654   | 16.16 | 16.55 | 17.78 | 17.31 | 17.23 | 17.84 | 18.24 | 18.58 |
| 0.559 | -1.02 | 0.49 Q8CA72   | Gigaxin                                                                    | Gan           | 3426  | 6  | 6  | 5    | 10.2  | 10.2   | 8.2    | 67.67   | 0.0000  | 18.849   | 7424500   | 62    | 15.75 | 15.36 | 12.32 | 13.55 | 14.93 | 14.87 | 16.15 | 15.14 |
| 1.141 | -1.02 | 0.49 Q8QMF1   | Mammalian ependymal-related protein 1                                      | Usp1          | 1057  | 3  | 3  | 16.1 | 16.1  | 10.7   | 25.485 | 0.0000  | 13.04   | 1100600  | 33        | 13.41 | 13.94 | 12.89 | 14.51 | 14.56 | 14.96 | 14.56 | 14.85 |       |
| 1.228 | -1.02 | 0.49 P18608   | Non-histone chromosomal protein HMG-14                                     | Hmg1n1        | 838   | 6  | 6  | 6    | 67.7  | 67.7   | 67.7   | 10.152  | 0.0000  | 10.639   | 9819800   | 83    | 14.41 | 15.70 | 15.07 | 14.94 | 15.20 | 16.35 | 16.87 | 15.79 |
| 1.707 | -1.03 | 0.49 P61082   | NEDD8-conjugating enzyme Ubc12                                             | Ubc2m         | 1369  | 12 | 12 | 11   | 55.7  | 55.7   | 54.1   | 20.9    | 0.0000  | 22.889   | 81727000  | 247   | 18.06 | 18.24 | 15.45 | 17.83 | 18.32 | 18.47 | 18.44 | 18.44 |
| 2.218 | -1.03 | 0.49 Q8QWCE   | Mitochondrial fission regulator 1-like                                     | Mfr1l1        | 4711  | 7  | 7  | 7    | 39.1  | 39.1   | 39.1   | 31.726  | 0.0000  | 21.674   | 6348400   | 92    | 14.53 | 14.92 | 15.06 | 14.60 | 16.13 | 15.48 | 15.40 | 16.21 |
| 0.520 | -1.03 | 0.49 Q8CYL5   | 60S ribosomal protein L16                                                  | Rpl16         | 4502  | 6  | 6  | 6    | 50.6  | 50.6   | 50.6   | 17.09   | 0.0000  | 47.806   | 9413400   | 143   | 14.41 | 14.03 | 12.64 | 14.51 | 14.79 | 15.53 | 14.96 | 15.35 |
| 1.148 | -1.03 | 0.49 Q8QD69   | C-Maf-inducing protein                                                     | Cmp           | 4973  | 5  | 5  | 5    | 11.6  | 11.6   | 11.6   | 86.258  | 0.0000  | 38.033   | 3879000   | 16    | 14.12 | 14.28 | 13.33 | 13.06 | 14.50 | 13.85 | 15.57 | 15.00 |
| 1.774 | -1.03 | 0.49 Q8QPR4   | 60S ribosomal protein L17                                                  | Rpl17         | 4529  | 20 | 20 | 20   | 68.8  | 68.8   | 68.8   | 21.423  | 0.0000  | 323.31   | 41265000  | 1012  | 18.88 | 19.48 | 19.10 | 19.85 | 20.23 | 20.42 | 19.84 | 20.95 |
| 2.323 | -1.04 | 0.49 Q8T103   | Zinc finger protein ubi-4D                                                 | Dp42          | 2252  | 10 | 10 | 10   | 36.9  | 36.9   | 38.9   | 44.229  | 0.0000  | 62.882   | 14173000  | 140   | 14.80 | 15.53 | 14.74 | 14.77 | 15.82 | 16.41 | 15.96 | 15.80 |
| 1.002 | -1.04 | 0.49 Q8BT54   | Nuclear pore complex subunit 9                                             | Nup54         | 3205  | 9  | 9  | 25.9 | 25.9  | 25.9   | 55.731 | 0.0000  | 47.806  | 9413400  | 143       | 14.41 | 14.03 | 12.64 | 14.51 | 14.79 | 15.53 | 14.96 | 15.35 |       |
| 0.598 | -1.04 | 0.49 Q8Q2M7   | Mannose-6-phosphate isomerase                                              | Mpi           | 4297  | 8  | 8  | 8    | 33.1  | 33.1   | 33.1   | 46.575  | 0.0000  | 51.349   | 11058000  | 80    | 14.79 | 13.06 | 16.24 | 15.80 | 16.33 | 15.64 | 16.46 | 14.74 |
| 1.826 | -1.05 | 0.48 Q8QDE1   | Heterogeneous nuclear ribonucleoprotein M                                  | Hnrmmp        | 4861  | 69 | 69 | 69   | 78.9  | 78.9   | 78.9   | 77.648  | 0.0000  | 323.31   | 100460000 | 2248  | 18.86 | 19.47 | 18.19 | 18.82 | 19.48 | 20.24 | 19.77 | 20.04 |
| 1.561 | -1.05 | 0.48 Q8ERU3   | Zinc finger protein ZNF22                                                  | Znf22         | 5319  | 5  | 5  | 20.3 | 20.3  | 20.3   | 27.294 | 0.0000  | 16.706  | 8865300  | 94        | 14.48 | 15.21 | 14.24 | 15.46 | 15.52 | 16.07 | 15.56 | 16.43 |       |
| 1.302 | -1.05 | 0.48 Q8Q2H8   | Bone marrow stromal antigen 2                                              | Bst2          | 3814  | 5  | 5  | 17.4 | 17.4  | 17.4   | 19.152 | 0.0000  | 27.353  | 6384300  | 60        | 14.29 | 12.52 | 13.4  | 12.52 | 14.56 | 14.86 | 14.74 | 14.25 |       |
| 1.302 | -1.05 | 0.48 Q83TH3   | General transcription factor IIF subunit 1                                 | Gtf2f1        | 1845  | 16 | 16 | 16   | 30.7  | 30.7   | 30.7   | 57.241  | 0.0000  | 187.98   | 48330000  | 223   | 16.21 | 17.28 | 17.45 | 16.94 | 17.92 | 18.52 | 17.13 | 18.51 |
| 0.931 | -1.05 | 0.48 Q8J6B2   | G-protein coupled receptor 183                                             | Gpr183        | 1928  | 2  | 2  | 2    | 5.6   | 5.6    | 5.6    | 40.184  | 0.0000  | 9.0131   | 1120800   | 18    | 12.52 | 11.53 | 11.96 | 12.54 | 14.42 | 12.83 | 11.96 | 13.55 |
| 2.060 | -1.05 | 0.48 Q8CY14   | Putative RNA-binding protein Luc7-like 1                                   | Luc7l1        | 4800  |    |    |      |       |        |        |         |         |          |           |       |       |       |       |       |       |       |       |       |

|       |       |             |                                                               |         |      |    |    |    |       |       |       |        |        |        |           |      |       |       |       |       |       |       |       |       |
|-------|-------|-------------|---------------------------------------------------------------|---------|------|----|----|----|-------|-------|-------|--------|--------|--------|-----------|------|-------|-------|-------|-------|-------|-------|-------|-------|
| 0.444 | -1.16 | 0.45 Q61827 | Transcription factor MafK                                     | Mafk    | 2337 | 8  | 8  | 6  | 47.4  | 47.4  | 38.5  | 17.537 | 0.0000 | 10.717 | 15099000  | 42   | 14.45 | 15.92 | 16.87 | 13.60 | 13.74 | 17.37 | 16.58 | 17.78 |
| 1.397 | -1.16 | 0.45 P21126 | Ubiquitin-like protein 4A                                     | Ubi4a   | 860  | 10 | 10 | 10 | 70.1  | 70.1  | 70.1  | 17.8   | 0.0000 | 30.414 | 34373000  | 281  | 15.39 | 16.56 | 14.92 | 15.52 | 16.36 | 17.21 | 16.20 | 17.27 |
| 2.251 | -1.16 | 0.45 Q6CWW6 | Peptidyl-prolyl cis-trans isomerase NIMA-interacting 4        | Pin4    | 4735 | 11 | 11 | 11 | 74.8  | 74.8  | 74.8  | 13.815 | 0.0000 | 206.16 | 101700000 | 270  | 17.89 | 18.57 | 17.48 | 17.48 | 19.05 | 19.27 | 18.89 | 18.88 |
| 1.968 | -1.16 | 0.45 Q8U072 | Protein scribble homolog                                      | Scrbp   | 2823 | 21 | 21 | 21 | 20.9  | 20.9  | 20.9  | 174.06 | 0.0000 | 89.354 | 161110000 | 222  | 14.56 | 14.49 | 14.65 | 14.89 | 14.96 | 15.76 | 16.26 | 16.26 |
| 1.842 | -1.17 | 0.45 Q8K367 | 1-acyl-sn-glycerol-3-phosphate acyltransferase beta           | Agpat2  | 3704 | 3  | 3  | 3  | 22.77 | 22.77 | 22.77 | 31.01  | 0.0000 | 6.0181 | 2318400   | 27   | 13.17 | 13.58 | 12.72 | 13.47 | 13.77 | 14.16 | 14.71 | 15.15 |
| 1.693 | -1.17 | 0.45 Q8DCL2 | MP18 family protein FAM66A                                    | Fam66a  | 5220 | 4  | 4  | 4  | 30.9  | 30.9  | 30.9  | 18.418 | 0.0000 | 7.3362 | 6466500   | 64   | 14.95 | 15.51 | 13.84 | 15.09 | 16.09 | 16.21 | 15.70 | 16.05 |
| 2.315 | -1.17 | 0.44 Q9CY73 | 39S ribosomal protein L44, mitochondrial                      | Mrp44   | 4790 | 10 | 10 | 10 | 37.2  | 37.2  | 37.2  | 37.527 | 0.0000 | 43.835 | 15612000  | 96   | 15.47 | 15.57 | 14.91 | 14.80 | 16.60 | 16.71 | 15.90 | 16.21 |
| 1.445 | -1.17 | 0.44 Q9WU84 | Copper chaperone for superoxide dismutase                     | Cos     | 5701 | 7  | 7  | 7  | 38    | 38    | 38    | 28.91  | 0.0000 | 42.89  | 10476000  | 79   | 14.48 | 14.80 | 13.88 | 15.63 | 15.78 | 16.56 | 15.54 | 15.60 |
| 1.633 | -1.17 | 0.44 Q9CJF9 | Protein arginase-3                                            | Arg3    | 3570 | 3  | 3  | 3  | 16.3  | 16.3  | 16.3  | 27.6   | 0.0000 | 30.262 | 6033600   | 24   | 16.66 | 16.24 | 16.43 | 16.16 | 16.02 | 16.16 | 17.21 | 15.50 |
| 1.209 | -1.18 | 0.44 Q8C989 | Death-inducible inhibitor 1                                   | Dido1   | 3424 | 10 | 10 | 9  | 6.9   | 6.9   | 6.2   | 247.17 | 0.0000 | 96.57  | 14676000  | 85   | 16.43 | 16.00 | 14.89 | 15.48 | 15.71 | 17.21 | 17.20 | 17.38 |
| 0.704 | -1.18 | 0.44 Q9D984 | Leucine-rich repeat-containing protein C10orf11 homolog       | Rps21   | 5100 | 9  | 9  | 9  | 38    | 38    | 38    | 25.988 | 0.0000 | 54.336 | 11195000  | 102  | 15.21 | 15.61 | 12.36 | 15.56 | 15.85 | 16.37 | 15.24 | 15.99 |
| 1.742 | -1.18 | 0.44 Q9Y1U8 | Suppressor of SWH1 homolog                                    | Ppsn    | 4181 | 7  | 7  | 7  | 16.8  | 16.8  | 16.8  | 52.755 | 0.0000 | 23.813 | 5831100   | 71   | 14.52 | 14.28 | 14.38 | 13.04 | 15.02 | 15.58 | 15.04 | 15.30 |
| 1.945 | -1.18 | 0.44 Q9C367 | Uncharacterized protein C7orf60 homolog                       | Rps1    | 3747 | 8  | 8  | 8  | 37.4  | 37.4  | 37.4  | 22.168 | 0.0000 | 19.47  | 1693100   | 6    | 13.57 | 12.99 | 11.84 | 13.27 | 13.45 | 14.37 | 14.70 | 15.15 |
| 1.351 | -1.18 | 0.44 P62843 | 40S ribosomal protein S15                                     | Rps15   | 1452 | 11 | 11 | 11 | 77.2  | 77.2  | 77.2  | 17.04  | 0.0000 | 323.31 | 699510000 | 1029 | 20.49 | 20.49 | 19.71 | 21.58 | 20.96 | 21.81 | 21.91 | 21.93 |
| 1.095 | -1.19 | 0.44 Q9QX04 | Integrin alpha-X                                              | Igax    | 5542 | 12 | 12 | 11 | 12.1  | 12.1  | 11.2  | 128.15 | 0.0000 | 30.485 | 5563800   | 57   | 15.07 | 13.44 | 14.45 | 13.49 | 16.16 | 15.51 | 15.30 | 14.22 |
| 2.362 | -1.19 | 0.44 Q9Z1N6 | Probable ATP-dependent RNA helicase DDX27                     | Ddx27   | 4235 | 8  | 8  | 8  | 14.2  | 14.2  | 14.2  | 83.98  | 0.0000 | 9.8602 | 7326800   | 80   | 12.16 | 15.03 | 15.24 | 14.28 | 16.32 | 16.09 | 16.35 | 15.70 |
| 1.718 | -1.19 | 0.44 Q9A006 | Taperin                                                       | Tpm     | 23   | 4  | 4  | 4  | 9.1   | 9.1   | 9.1   | 10.088 | 0.0000 | 12.324 | 2668800   | 25   | 13.18 | 14.10 | 13.20 | 13.30 | 15.22 | 14.38 | 15.03 | 15.03 |
| 1.073 | -1.19 | 0.44 Q9NC99 | Nuclear speckle splicing regulatory protein 1                 | Nsp1    | 2119 | 6  | 6  | 6  | 13.1  | 13.1  | 13.1  | 63.798 | 0.0000 | 20.8   | 3044100   | 19   | 13.55 | 13.60 | 13.20 | 13.24 | 15.78 | 13.17 | 14.26 | 15.14 |
| 2.205 | -1.19 | 0.44 Q9CQR2 | 40S ribosomal protein S21                                     | Rps21   | 4624 | 8  | 8  | 8  | 77.1  | 77.1  | 77.1  | 9.1413 | 0.0000 | 115.07 | 51713000  | 255  | 17.28 | 17.73 | 16.87 | 17.54 | 18.17 | 19.08 | 18.19 | 18.75 |
| 1.157 | -1.19 | 0.44 Q9Z2S1 | O-acetyl-ADP-ribose deacetylase MACROD1                       | MacroD1 | 4246 | 4  | 4  | 4  | 17.6  | 17.6  | 17.6  | 35.294 | 0.0000 | 21.263 | 4843400   | 37   | 13.47 | 13.71 | 12.67 | 13.32 | 14.80 | 15.27 | 15.01 | 13.06 |
| 1.921 | -1.19 | 0.44 Q9B567 | 60S ribosomal protein L21                                     | Rpl21   | 329  | 18 | 18 | 18 | 70    | 70    | 70    | 18.562 | 0.0000 | 142.75 | 41076000  | 392  | 19.41 | 19.71 | 18.15 | 20.04 | 20.26 | 20.83 | 20.60 | 20.40 |
| 1.159 | -1.20 | 0.44 Q8V184 | 2-5-oligoadenylate synthase-like protein 1                    | Osl1    | 4033 | 7  | 7  | 7  | 19    | 19    | 19    | 59.088 | 0.0000 | 22.603 | 2897100   | 24   | 11.33 | 11.36 | 11.96 | 12.90 | 11.71 | 15.08 | 12.42 | 13.14 |
| 1.355 | -1.20 | 0.44 Q61072 | Disintegrin and metalloproteinase domain-containing protein 9 | Adam9   | 2244 | 2  | 2  | 2  | 4.5   | 4.5   | 4.5   | 92.079 | 0.0000 | 34.098 | 4226800   | 48   | 13.26 | 15.15 | 14.40 | 14.29 | 14.72 | 15.62 | 15.57 | 15.99 |
| 1.337 | -1.20 | 0.44 Q9J6J9 | PC4 and SFRS1-interacting protein                             | Psp1    | 4338 | 15 | 15 | 14 | 30.1  | 30.1  | 28.5  | 56.696 | 0.0000 | 123.7  | 6547400   | 144  | 17.91 | 16.80 | 16.60 | 16.86 | 18.85 | 18.88 | 18.98 | 19.46 |
| 2.702 | -1.20 | 0.43 Q9Z0V7 | 60S ribosomal protein L35                                     | Rpl35   | 168  | 16 | 16 | 16 | 81.8  | 81.8  | 81.8  | 14.552 | 0.0000 | 323.31 | 855630000 | 946  | 20.12 | 20.68 | 20.76 | 20.41 | 21.84 | 20.57 | 22.17 | 22.17 |
| 3.908 | -1.21 | 0.43 Q9P9L5 | Ribosome-binding protein                                      | Rbp1    | 4507 | 95 | 95 | 95 | 64.6  | 64.6  | 64.6  | 172.88 | 0.0000 | 323.31 | 317360000 | 2201 | 17.21 | 17.37 | 17.24 | 17.21 | 18.38 | 18.82 | 18.19 | 18.86 |
| 1.426 | -1.21 | 0.43 P17095 | High mobility group protein HMIG-HMIG-Y                       | Hmg1a   | 818  | 6  | 6  | 6  | 61.7  | 61.7  | 61.7  | 11.614 | 0.0000 | 42.975 | 10929000  | 64   | 13.31 | 14.42 | 17.65 | 14.36 | 17.87 | 16.33 | 16.51 | 13.45 |
| 2.183 | -1.21 | 0.43 P10171 | Transcription elongation factor A protein 1                   | Tef1    | 728  | 28 | 28 | 28 | 78.4  | 78.4  | 78.4  | 33.88  | 0.0000 | 323.31 | 100550000 | 677  | 17.21 | 17.52 | 17.39 | 17.52 | 17.93 | 17.86 | 17.89 | 17.89 |
| 3.355 | -1.21 | 0.43 Q9CQ28 | Core histone macro-H2A.1                                      | H2alz1  | 5604 | 23 | 23 | 23 | 61.3  | 61.3  | 61.3  | 39.735 | 0.0000 | 323.31 | 302290000 | 894  | 19.05 | 19.26 | 19.21 | 19.39 | 20.54 | 20.77 | 20.01 | 20.43 |
| 0.743 | -1.22 | 0.43 Q9JKP8 | Chromatin accessibility complex protein 1                     | Chac1   | 5457 | 4  | 4  | 4  | 47.3  | 47.3  | 47.3  | 14.127 | 0.0000 | 18.12  | 4152300   | 59   | 14.31 | 12.29 | 12.42 | 15.25 | 14.96 | 14.91 | 15.47 | 13.85 |
| 3.092 | -1.22 | 0.43 P47911 | 60S ribosomal protein L6                                      | Rpl6    | 1129 | 28 | 28 | 28 | 57.4  | 57.4  | 57.4  | 33.509 | 0.0000 | 323.31 | 354020000 | 798  | 18.41 | 17.52 | 18.18 | 18.77 | 19.39 | 19.98 | 19.67 | 19.94 |
| 2.723 | -1.22 | 0.43 Q7TNC4 | Putative RNA-binding protein Luc1-like 2                      | Luc1c2  | 2758 | 28 | 28 | 28 | 49.5  | 49.5  | 49.5  | 223.96 | 0.0000 | 254.74 | 120810000 | 710  | 17.24 | 17.55 | 16.85 | 17.59 | 18.31 | 19.28 | 18.97 | 18.97 |
| 1.589 | -1.22 | 0.43 Q9C367 | Magnesium-dependent phosphatase 1                             | Mcp1    | 5098 | 7  | 7  | 7  | 61.6  | 61.6  | 61.6  | 18.882 | 0.0000 | 254.74 | 18976000  | 188  | 16.46 | 15.82 | 14.68 | 15.76 | 16.65 | 17.41 | 16.63 | 16.97 |
| 1.789 | -1.22 | 0.43 Q9S394 |                                                               | Akap13  | 232  | 13 | 13 | 13 | 9.5   | 9.5   | 9.5   | 303.97 | 0.0000 | 53.712 | 8261300   | 59   | 14.20 | 15.21 | 14.17 | 14.38 | 14.81 | 15.16 | 15.50 | 15.37 |
| 1.297 | -1.22 | 0.43 Q9B567 | Macrophage-capping protein                                    | Capg    | 897  | 24 | 24 | 24 | 52.6  | 52.6  | 52.6  | 39.24  | 0.0000 | 323.31 | 287290000 | 2006 | 21.55 | 22.20 | 19.86 | 21.40 | 22.36 | 22.70 | 22.41 | 22.44 |
| 1.221 | -1.22 | 0.43 P43276 | Hes1                                                          | Hes1b   | 128  | 18 | 18 | 18 | 57.8  | 57.8  | 57.8  | 22.576 | 0.0000 | 323.31 | 116850000 | 898  | 21.04 | 21.52 | 21.42 | 20.99 | 22.37 | 22.56 | 21.93 | 22.30 |
| 2.365 | -1.23 | 0.43 Q81171 | Peroxiredoxin-2                                               | Prx2    | 2267 | 12 | 11 | 11 | 57.6  | 57.6  | 52    | 21.778 | 0.0000 | 323.31 | 524580000 | 736  | 20.19 | 20.15 | 19.60 | 20.77 | 21.48 | 21.03 | 21.67 | 21.44 |
| 0.946 | -1.23 | 0.43 Q35071 | Kinesin-like protein KIF1C                                    | Kif1c   | 332  | 10 | 6  | 6  | 10.6  | 6.9   | 6.9   | 122.43 | 0.0000 | 18.074 | 6041100   | 57   | 15.37 | 15.58 | 13.08 | 15.17 | 15.30 | 16.78 | 16.28 | 15.75 |
| 1.586 | -1.24 | 0.42 Q91V81 | RNA-binding protein 42                                        | Rbn42   | 4050 | 11 | 11 | 11 | 30.5  | 30.5  | 30.5  | 50.235 | 0.0000 | 106.91 | 23497000  | 141  | 14.88 | 16.54 | 16.02 | 16.10 | 16.47 | 17.15 | 17.33 | 17.54 |
| 1.337 | -1.24 | 0.42 Q9D123 | 60S ribosomal protein L13                                     | Rpl13   | 1355 | 31 | 31 | 31 | 68.7  | 68.7  | 68.7  | 24.305 | 0.0000 | 323.31 | 189390000 | 1825 | 20.81 | 21.03 | 21.55 | 21.67 | 22.31 | 22.90 | 22.23 | 22.76 |
| 1.799 | -1.24 | 0.42 Q62446 | Peptidyl-prolyl cis-trans isomerase FKBP3                     | Fkbp3   | 2395 | 23 | 23 | 23 | 70.3  | 70.3  | 72.3  | 25.147 | 0.0000 | 79.784 | 65696000  | 436  | 16.87 | 18.13 | 16.66 | 17.18 | 18.81 | 18.22 | 18.17 | 18.42 |
| 3.939 | -1.25 | 0.42 Q61164 | Transcriptional repressor CTCF                                | Ctcf    | 2264 | 6  | 6  | 6  | 6.5   | 6.5   | 6.2   | 83.745 | 0.0000 | 61.987 | 13511000  | 134  | 15.62 | 15.73 | 15.27 | 15.52 | 16.48 | 16.88 | 16.84 | 16.93 |
| 2.678 | -1.25 | 0.42 P55194 | SH3 domain-binding protein 1                                  | Sh3bp1  | 1268 | 28 | 28 | 28 | 48.5  | 48.5  | 48.2  | 74.172 | 0.0000 | 318.41 | 123940000 | 719  | 17.01 | 17.57 | 16.83 | 17.45 | 17.99 | 18.64 | 18.50 | 18.72 |
| 1.599 | -1.25 | 0.42 Q9J6J8 | Probable ribosome biogenesis protein RLP24                    | Rpl24   | 4406 | 6  | 6  | 6  | 33.1  | 33.1  | 33.1  | 19.611 | 0.0000 | 8.364  | 5812000   | 49   | 14.26 | 14.27 | 15.01 | 14.11 | 14.62 | 15.35 | 15.07 | 15.07 |
| 1.122 | -1.25 | 0.42 Q9GN84 | 28S ribosomal protein S15b, mitochondrial                     | Mps15b  | 4485 | 3  | 3  | 3  | 24.8  | 24.8  | 24.8  | 28.702 | 0.0000 | 26.142 | 4572200   | 46   | 14.55 | 13.67 | 13.01 | 12.74 | 15.25 | 15.33 | 14.86 | 13.52 |
| 1.618 | -1.25 | 0.42 P14115 | 60S ribosomal protein L27a                                    | Rpl27a  | 773  | 13 | 13 | 13 | 66.9  | 66.9  | 66.9  | 16.605 | 0.0000 | 238.26 | 587490000 | 679  | 20.10 | 20.36 | 18.74 | 20.50 | 20.90 | 21.19 | 21.19 | 21.43 |
| 0.587 | -1.25 | 0.42 P9Y350 | Plakophilin-1                                                 | Pkpl1   | 1626 | 17 | 17 | 17 | 27.2  | 27.2  | 27.2  | 80.895 | 0.0000 | 52.979 | 24989000  | 73   | 14.91 | 17.34 | 17.18 | 14.32 | 17.49 | 18.66 | 15.56 | 17.06 |
| 2.747 | -1.25 | 0.42 Q9Y1Y2 | 60S ribosomal RNA processing protein 1 homolog B              | Rpl1b   | 4164 | 9  | 9  | 9  | 16.4  | 16.4  | 16.4  | 80.581 | 0.0000 | 24.531 | 8056800   | 91   | 15.81 | 14.54 | 13.87 | 14.62 | 15.16 | 15.72 | 15.65 | 15.74 |
| 0.870 | -1.25 | 0.42 Q8VD09 | Protein KR11 homolog                                          | Kr11    | 4169 | 11 | 11 | 11 | 21.7  | 21.7  | 21.7  | 82.056 | 0.0000 | 14.553 | 5695800   | 26   | 13.90 | 14.64 | 13.42 | 13.81 | 14.62 | 15.97 | 13.58 | 16.01 |
| 0.870 | -1.26 | 0.42 P70315 | Wiskott-Aldrich syndrome protein homolog                      | Was     | 1552 | 18 | 18 | 17 | 40    | 40    | 37.1  | 54.191 | 0.0000 | 323.31 | 42928000  | 242  | 17.20 | 17.57 | 14.40 | 16.04 |       |       |       |       |

|  |       |       |      |        |                                                                     |             |       |    |    |    |      |      |      |        |        |         |           |      |       |       |       |       |       |       |       |       |
|--|-------|-------|------|--------|---------------------------------------------------------------------|-------------|-------|----|----|----|------|------|------|--------|--------|---------|-----------|------|-------|-------|-------|-------|-------|-------|-------|-------|
|  | 0.773 | -1.48 | 0.36 | P26151 | High affinity immunoglobulin gamma Fc receptor 1                    | Fcgr1       | 918   | 10 | 10 | 10 | 24   | 24   | 24   | 44.887 | 0.0000 | 81.935  | 13880000  | 81   | 12.55 | 15.03 | 16.06 | 16.40 | 15.74 | 16.17 | 16.95 | 17.16 |
|  | 1.871 | -1.48 | 0.36 | P09926 | Surfeit locus protein 2                                             | Surf2       | 703   | 4  | 4  | 4  | 21   | 21   | 21   | 30.355 | 0.0000 | 22.456  | 6448800   | 43   | 13.59 | 14.70 | 15.25 | 14.07 | 16.13 | 15.46 | 16.40 | 15.55 |
|  | 1.110 | -1.48 | 0.36 | Q8CH02 | SURP and G-patch domain-containing protein 1                        | Surp1       | 3516  | 8  | 8  | 8  | 17.9 | 17.9 | 17.9 | 72.648 | 0.0000 | 26.703  | 2198500   | 28   | 12.48 | 13.87 | 12.45 | 11.87 | 15.02 | 13.99 | 12.64 | 14.94 |
|  | 0.871 | -1.48 | 0.36 | A2RTL5 | Arginine/serine-rich coiled-coil protein 2                          | Rsc2        | 50    | 5  | 5  | 5  | 28.2 | 28.2 | 28.2 | 43.876 | 0.0000 | 14.147  | 4303900   | 27   | 14.31 | 15.12 | 14.10 | 12.12 | 16.14 | 15.85 | 13.69 | 15.89 |
|  | 1.793 | -1.48 | 0.36 | P62242 | 40S ribosomal protein S8                                            | Rps8        | 1408  | 8  | 8  | 8  | 58.7 | 58.7 | 58.7 | 24.024 | 0.0000 | 275.68  | 29676000  | 194  | 19.11 | 19.44 | 19.11 | 19.44 | 19.11 | 19.44 | 19.11 | 19.44 |
|  | 1.457 | -1.49 | 0.36 | Q8CF66 | Regulator complex protein LAMTOR4;Regulator complex protein LAMTOR4 | Ragc4       | 3475  | 2  | 2  | 2  | 17.2 | 17.2 | 17.2 | 10.678 | 0.0020 | 3.0928  | 3666600   | 34   | 13.92 | 14.03 | 13.76 | 13.20 | 15.63 | 15.53 | 13.69 | 15.99 |
|  | 2.168 | -1.49 | 0.36 | Q81823 | Programmed cell death protein 4                                     | Pdcd4       | 2336  | 8  | 8  | 8  | 28.6 | 28.6 | 28.6 | 51.702 | 0.0000 | 13.578  | 4237700   | 30   | 13.31 | 14.00 | 13.01 | 12.74 | 14.48 | 14.46 | 15.49 | 14.58 |
|  | 1.944 | -1.49 | 0.36 | Q8BF72 | HAUS augmin-like complex subunit 4                                  | Hau4        | 2947  | 4  | 4  | 4  | 20.4 | 20.4 | 20.4 | 42.196 | 0.0000 | 36.432  | 4237700   | 24   | 13.30 | 13.76 | 13.00 | 14.14 | 14.59 | 14.87 | 16.01 | 14.69 |
|  | 1.013 | -1.49 | 0.36 | Q8CQR7 | Protein-tyrosine phosphatase SH-PTPase                              | Shpt        | 5503  | 8  | 8  | 8  | 55.8 | 55.8 | 55.8 | 18.37  | 0.0000 | 83.958  | 14048000  | 171  | 14.26 | 15.11 | 14.70 | 14.50 | 15.37 | 15.11 | 15.44 | 15.35 |
|  | 1.248 | -1.50 | 0.35 | Q9D902 | General transcription factor IIE subunit 2                          | Gtf2e2      | 5087  | 11 | 11 | 11 | 47.3 | 47.3 | 47.3 | 33.046 | 0.0000 | 34.515  | 11253000  | 131  | 15.00 | 15.62 | 12.78 | 14.58 | 15.92 | 16.32 | 15.53 | 16.18 |
|  | 2.732 | -1.50 | 0.35 | P62858 | 40S ribosomal protein S28                                           | Rps28       | 1456  | 9  | 9  | 9  | 72.5 | 72.5 | 72.5 | 7.8409 | 0.0000 | 71.422  | 49709000  | 237  | 16.44 | 16.82 | 16.14 | 16.09 | 17.80 | 18.31 | 17.26 | 18.11 |
|  | 1.274 | -1.50 | 0.35 | P61865 | Small ubiquitin-related modifier 1                                  | Sumo1       | 1494  | 6  | 6  | 6  | 53.5 | 53.5 | 53.5 | 11.567 | 0.0002 | 5.676   | 11621000  | 96   | 15.88 | 15.34 | 13.36 | 13.71 | 16.06 | 16.19 | 15.75 | 16.31 |
|  | 1.706 | -1.50 | 0.35 | P70279 | Surf2                                                               | Surf2       | 1454  | 20 | 20 | 20 | 40.3 | 40.3 | 40.3 | 41.224 | 0.0000 | 46.758  | 21854000  | 151  | 14.51 | 15.76 | 14.51 | 14.51 | 15.76 | 16.26 | 16.26 | 17.06 |
|  | 1.689 | -1.51 | 0.35 | Q70279 | Protein DGCR14                                                      | Dgcr14      | 482   | 4  | 4  | 4  | 15   | 15   | 15   | 52.603 | 0.0000 | 56.808  | 14022000  | 85   | 13.72 | 15.19 | 13.40 | 13.77 | 15.24 | 15.96 | 14.91 | 16.02 |
|  | 4.772 | -1.52 | 0.35 | P62754 | 40S ribosomal protein S6                                            | Rps6        | 1443  | 33 | 33 | 33 | 69.5 | 69.5 | 69.5 | 28.68  | 0.0000 | 323.31  | 158350000 | 1973 | 20.98 | 21.24 | 21.00 | 21.11 | 22.24 | 22.87 | 22.57 | 22.73 |
|  | 1.280 | -1.52 | 0.35 | Q8CR47 | Ribosome biogenesis protein NSA2 homolog                            | Nsa2        | 4665  | 6  | 6  | 6  | 26.9 | 26.9 | 26.9 | 30.036 | 0.0027 | 2.6928  | 2129900   | 13   | 13.26 | 12.61 | 13.57 | 13.47 | 13.76 | 15.61 | 14.42 | 15.19 |
|  | 1.555 | -1.52 | 0.35 | Q8B655 | 60S ribosomal protein L4                                            | Rpl4        | 5260  | 44 | 44 | 44 | 64.4 | 64.4 | 64.4 | 47.153 | 0.0000 | 323.31  | 75648000  | 1728 | 18.53 | 18.95 | 20.29 | 20.30 | 20.52 | 21.14 | 21.61 | 21.84 |
|  | 2.183 | -1.53 | 0.35 | Q8C9N1 | SNW domain-containing protein 1                                     | Snw1        | 4699  | 23 | 23 | 23 | 53.4 | 53.4 | 53.4 | 61.475 | 0.0000 | 254.13  | 53849000  | 494  | 15.61 | 16.53 | 14.86 | 15.88 | 17.46 | 17.25 | 16.83 | 17.43 |
|  | 1.143 | -1.53 | 0.35 | P70271 | POZ and LIM domain protein 4                                        | Pdlim4      | 1543  | 11 | 11 | 11 | 45.2 | 45.2 | 45.2 | 35.556 | 0.0000 | 37.599  | 14361000  | 103  | 15.46 | 15.65 | 13.03 | 15.48 | 16.96 | 16.90 | 15.64 | 16.23 |
|  | 1.354 | -1.53 | 0.35 | Q9C257 | Junction plakoglobin                                                | Jup         | 1178  | 32 | 32 | 32 | 29   | 29   | 29   | 8.7    | 0.0000 | 286.43  | 18170000  | 652  | 15.84 | 17.22 | 17.57 | 15.67 | 18.10 | 18.78 | 17.09 | 18.44 |
|  | 1.422 | -1.53 | 0.35 | Q8C9H9 | Histone lysine demethylase PHF8                                     | Phf8        | 2895  | 6  | 6  | 6  | 8.7  | 8.7  | 8.7  | 13.55  | 0.0000 | 32.603  | 8244600   | 68   | 14.87 | 15.25 | 14.11 | 15.27 | 16.56 | 16.33 | 16.31 | 16.61 |
|  | 0.865 | -1.53 | 0.35 | P49282 | Natural resistance-associated macrophage protein 2                  | Slc11a2     | 1157  | 2  | 2  | 2  | 9    | 9    | 9    | 62.367 | 0.0000 | 35.014  | 3859200   | 37   | 13.00 | 14.62 | 13.69 | 13.65 | 15.49 | 15.73 | 16.91 | 12.97 |
|  | 1.486 | -1.54 | 0.34 | P58808 | SAM and SH3 domain-containing protein 1                             | Sash1       | 1345  | 21 | 21 | 21 | 26.4 | 26.4 | 26.4 | 135.59 | 0.0000 | 105.65  | 16689000  | 69   | 16.08 | 16.29 | 14.39 | 16.21 | 16.83 | 17.33 | 16.78 | 18.17 |
|  | 2.036 | -1.54 | 0.34 | Q8C9H8 | Transcriptional repressor p58 alpha                                 | Gata2a      | 3534  | 18 | 18 | 18 | 42.6 | 42.6 | 42.6 | 6.7    | 0.0000 | 195.05  | 30735000  | 377  | 14.41 | 21.25 | 13.62 | 16.11 | 15.72 | 16.41 | 16.78 | 16.37 |
|  | 2.751 | -1.54 | 0.34 | P19253 | 60S ribosomal protein L13a                                          | Rpl13a      | 844   | 22 | 22 | 22 | 70.4 | 70.4 | 70.4 | 23.464 | 0.0000 | 73.545  | 17710000  | 504  | 18.52 | 18.52 | 17.42 | 18.15 | 19.49 | 19.73 | 19.51 | 20.03 |
|  | 1.566 | -1.54 | 0.34 | Q99N92 | 39S ribosomal protein L27, mitochondrial                            | Rplp27      | 4490  | 7  | 7  | 7  | 52.7 | 52.7 | 52.7 | 15.944 | 0.0000 | 35.442  | 25475000  | 165  | 16.03 | 17.16 | 15.96 | 14.84 | 17.27 | 18.17 | 17.09 | 17.63 |
|  | 1.882 | -1.55 | 0.34 | Q71F05 | E3 ubiquitin-protein ligase ZNRF2                                   | Znf2        | 2714  | 4  | 4  | 4  | 42.9 | 42.9 | 42.9 | 23.705 | 0.0000 | 45.245  | 6478700   | 87   | 14.26 | 15.39 | 13.34 | 13.74 | 15.73 | 15.72 | 15.73 | 15.72 |
|  | 2.133 | -1.55 | 0.34 | Q9CPT5 | Nucleotide protein 16                                               | Nup16       | 453   | 15 | 15 | 15 | 69.1 | 69.1 | 69.1 | 94.825 | 0.0000 | 136.150 | 15000000  | 161  | 15.14 | 15.14 | 14.70 | 14.70 | 15.39 | 15.46 | 15.35 | 15.21 |
|  | 1.170 | -1.55 | 0.34 | Q91X96 | Guanine nucleotide exchange factor MSS4                             | Rabf1       | 4138  | 3  | 3  | 3  | 28.5 | 28.5 | 28.5 | 13.915 | 0.0000 | 8.2748  | 4970000   | 46   | 13.54 | 15.74 | 13.92 | 14.28 | 15.65 | 16.71 | 14.62 | 16.70 |
|  | 0.434 | -1.55 | 0.34 | Q7TFS1 | Desmoglein-1-beta;Desmoglein-1-alpha                                | Dsg1b;Dsg1a | 2306  | 5  | 5  | 5  | 3.4  | 3.4  | 3.4  | 114.45 | 0.0000 | 9.9671  | 14458000  | 32   | 13.15 | 19.24 | 14.68 | 13.86 | 16.75 | 19.05 | 15.46 | 15.86 |
|  | 1.717 | -1.55 | 0.34 | Q9CQV6 | Ubiquitin-cytochrome-c reductase complex assembly factor 2          | Ugc2        | 4649  | 3  | 3  | 3  | 27.9 | 27.9 | 27.9 | 16.33  | 0.0000 | 15.97   | 7918300   | 63   | 15.14 | 15.74 | 15.09 | 13.66 | 16.19 | 16.92 | 16.04 | 16.67 |
|  | 0.860 | -1.52 | 0.34 | Q8C9H7 | CCO-42 small effector protein                                       | Cox2a2e2    | 2964  | 3  | 3  | 3  | 69   | 69   | 69   | 9.2264 | 0.0000 | 232.65  | 32790000  | 152  | 17.49 | 17.58 | 15.58 | 15.58 | 16.21 | 17.63 | 16.10 | 17.48 |
|  | 1.419 | -1.58 | 0.34 | Q61464 | Zinc finger protein 638                                             | Znf638      | 2302  | 17 | 17 | 17 | 69   | 69   | 69   | 218.13 | 0.0000 | 100.28  | 18872000  | 131  | 14.87 | 15.67 | 14.40 | 15.22 | 16.19 | 16.70 | 17.19 | 16.19 |
|  | 1.628 | -1.58 | 0.33 | P06060 | Protein transport protein SecE1 subunit gamma                       | Secd1g      | 1350  | 3  | 3  | 3  | 29.4 | 29.4 | 29.4 | 7.7412 | 0.0000 | 42.123  | 25663000  | 99   | 16.64 | 16.36 | 15.25 | 16.58 | 17.63 | 18.43 | 16.68 | 18.40 |
|  | 2.246 | -1.60 | 0.33 | Q8DB04 | Interferon-induced 35 kDa protein homolog                           | Ih35        | 5059  | 13 | 13 | 13 | 60.5 | 60.5 | 60.5 | 31.875 | 0.0000 | 99.903  | 35767000  | 160  | 16.01 | 16.83 | 15.20 | 15.81 | 17.37 | 17.76 | 17.17 | 17.94 |
|  | 2.730 | -1.60 | 0.33 | P62900 | 60S ribosomal protein L31                                           | Rpl31       | 14631 | 12 | 12 | 12 | 64   | 64   | 64   | 14.463 | 0.0000 | 196.51  | 454470000 | 548  | 20.43 | 20.03 | 19.84 | 19.84 | 20.43 | 20.03 | 20.99 | 21.70 |
|  | 0.721 | -1.60 | 0.33 | Q8CQ6A | Coiled-coil-helix-coiled-coil-helix domain-containing protein 1     | Chchd1      | 4579  | 2  | 2  | 2  | 16.1 | 16.1 | 16.1 | 13.608 | 0.0000 | 66.402  | 13143000  | 67   | 16.52 | 17.22 | 12.63 | 16.44 | 16.51 | 18.01 | 17.44 | 17.25 |
|  | 0.909 | -1.60 | 0.33 | Q8DBE9 | pre-RNA processing protein FTSJ3                                    | Ftsj3       | 5147  | 7  | 7  | 7  | 13.4 | 13.4 | 13.4 | 95.531 | 0.0000 | 41.941  | 7830700   | 84   | 13.67 | 14.93 | 14.48 | 14.31 | 15.86 | 16.10 | 15.98 | 15.87 |
|  | 0.801 | -1.61 | 0.33 | Q84475 | Histone H2B type 1-B                                                | Hist1b2b    | 2447  | 25 | 1  | 1  | 92.1 | 8.7  | 8.7  | 13.952 | 0.0008 | 2.1731  | 6676700   | 74   | 15.10 | 15.30 | 13.71 | 13.58 | 13.88 | 15.73 | 18.05 | 16.68 |
|  | 1.036 | -1.62 | 0.33 | P62725 | 60S ribosomal protein L23a                                          | Rpl23a      | 6038  | 18 | 18 | 18 | 62.4 | 62.4 | 62.4 | 18.811 | 0.0000 | 131.61  | 60022000  | 749  | 21.91 | 22.75 | 19.31 | 19.31 | 21.91 | 22.75 | 22.56 | 22.56 |
|  | 0.985 | -1.61 | 0.33 | Q8CPZ8 | COX assembly mitochondrial protein homolog                          | Cmc1        | 4548  | 3  | 3  | 3  | 26.4 | 26.4 | 26.4 | 12.552 | 0.0017 | 3.3316  | 4107800   | 17   | 12.31 | 13.41 | 13.98 | 15.81 | 16.00 | 14.61 | 15.18 | 15.98 |
|  | 2.036 | -1.62 | 0.33 | Q6NZB0 | DnaJ homolog subfamily C member 8                                   | DnaJc8      | 2542  | 19 | 18 | 18 | 75.5 | 75.5 | 75.5 | 29.812 | 0.0000 | 175.9   | 23278000  | 177  | 14.97 | 16.20 | 15.06 | 14.39 | 17.04 | 17.11 | 16.21 | 16.74 |
|  | 3.223 | -1.62 | 0.33 | Q8SKR2 | Charged multivesicular body protein 4b                              | Nuam1       | 2660  | 8  | 8  | 8  | 47.2 | 47.2 | 47.2 | 22.983 | 0.0000 | 27.032  | 12489000  | 94   | 14.45 | 14.59 | 14.71 | 14.19 | 15.63 | 16.65 | 16.23 | 15.91 |
|  | 1.533 | -1.62 | 0.33 | Q8DB83 | 60S ribosomal protein L29                                           | Rpl29       | 5257  | 14 | 14 | 14 | 52.7 | 52.7 | 52.7 | 24.936 | 0.0000 | 236.84  | 32718000  | 165  | 15.89 | 16.31 | 12.66 | 16.58 | 17.04 | 17.49 | 16.46 | 16.46 |
|  | 1.054 | -1.63 | 0.32 | Q8D623 | 60S ribosomal protein L37                                           | Rpl37       | 5047  | 6  | 6  | 6  | 52.6 | 52.6 | 52.6 | 11.078 | 0.0004 | 4.338   | 44977000  | 99   | 16.96 | 17.26 | 15.30 | 18.63 | 18.69 | 17.66 | 16.81 | 19.71 |
|  | 2.325 | -1.63 | 0.32 | P47915 | 60S ribosomal protein L29                                           | Rpl29       | 1130  | 17 | 17 | 17 | 56.9 | 56.9 | 56.9 | 17.587 | 0.0000 | 76.888  | 25883000  | 435  | 18.73 | 19.27 | 19.11 | 20.23 | 20.77 | 21.12 | 20.54 | 21.41 |
|  | 1.781 | -1.64 | 0.32 | Q9D168 | Integrator complex subunit 12                                       | Ints12      | 4898  | 4  | 4  | 4  | 11.9 | 11.9 | 11.9 | 48.568 | 0.0000 | 11.934  | 30405000  | 36   | 13.69 | 13.55 | 13.19 | 13.24 | 13.81 | 16.01 | 15.57 | 14.84 |
|  | 2.322 | -1.65 | 0.32 | Q8CQV1 | Pre-mRNA-splicing factor CWK25 homolog                              | Rps10       | 45910 | 15 | 15 | 15 | 77.9 | 77.9 | 77.9 | 21.151 | 0.0000 | 185.32  | 147400000 | 486  | 18.04 | 19.37 | 15.18 | 17.58 | 19.30 | 19.18 | 18.55 | 19.25 |
|  | 1.292 | -1.65 | 0    |        |                                                                     |             |       |    |    |    |      |      |      |        |        |         |           |      |       |       |       |       |       |       |       |       |

|       |       |      |        |                                                                            |            |      |    |    |    |      |      |        |        |        |         |           |       |       |       |       |       |       |       |       |       |
|-------|-------|------|--------|----------------------------------------------------------------------------|------------|------|----|----|----|------|------|--------|--------|--------|---------|-----------|-------|-------|-------|-------|-------|-------|-------|-------|-------|
| 3.284 | -2.06 | 0.24 | Q8BGA5 | KRR1 small subunit processome component homolog                            | Krr1       | 2970 | 8  | 8  | 8  | 30.3 | 30.3 | 30.3   | 43.537 | 0.0000 | 12.058  | 7852700   | 37    | 13.84 | 13.87 | 14.06 | 14.47 | 15.70 | 16.90 | 16.07 | 15.81 |
| 1.322 | -2.07 | 0.24 | Q3VZQ8 | NEDD4-binding protein 2-like 1                                             | N4bg2t1    | 2051 | 5  | 5  | 5  | 25.2 | 25.2 | 25.2   | 28.038 | 0.0000 | 11.997  | 34171000  | 54    | 16.97 | 18.62 | 15.12 | 17.84 | 18.13 | 19.62 | 19.55 | 19.53 |
| 2.322 | -2.09 | 0.23 | POCG14 | Chromosome transmission fidelity protein 8 homolog isoform 2               | Chtf8      | 709  | 12 | 12 | 12 | 36.2 | 36.2 | 36.2   | 52.244 | 0.0000 | 51.981  | 16896000  | 107   | 15.30 | 14.85 | 13.31 | 14.86 | 16.51 | 16.72 | 16.26 | 17.21 |
| 1.786 | -2.11 | 0.23 | P45878 | Peptidyl-prolyl cis-trans isomerase FKBP2                                  | Fkbp2      | 1099 | 3  | 3  | 3  | 14.3 | 14.3 | 14.3   | 15.344 | 0.0000 | 10.835  | 13885000  | 56    | 15.58 | 16.81 | 13.91 | 14.64 | 17.41 | 17.57 | 16.99 | 17.41 |
| 1.704 | -2.13 | 0.23 | Q8BZP9 | Uncharacterized protein C17orf85 homolog                                   |            | 3318 | 12 | 12 | 12 | 19.7 | 19.7 | 19.7   | 70.042 | 0.0000 | 37.218  | 92206000  | 92    | 14.17 | 15.47 | 13.13 | 12.68 | 15.61 | 16.28 | 15.47 | 16.59 |
| 0.349 | -2.15 | 0.23 | Q06830 | Peroxiredoxin-1                                                            | PRDX1      | 1752 | 18 | 6  | 4  | 69.3 | 32.2 | 23.1   | 22.11  | 0.0000 | 23.876  | 77606000  | 26    | 19.71 | 18.87 | 12.27 | 12.87 | 20.94 | 12.94 | 18.45 | 19.99 |
| 1.965 | -2.16 | 0.22 | Q8K003 | Translation machinery-associated protein 7                                 | Tma7       | 3590 | 7  | 6  | 6  | 53.1 | 40.6 | 40.6   | 7.0662 | 0.0000 | 11.939  | 25853000  | 94    | 15.07 | 16.55 | 14.21 | 14.48 | 18.06 | 16.91 | 17.19 | 16.80 |
| 1.046 | -2.21 | 0.22 | Q9D684 | Ras and Rab interactor 2                                                   | Rin2       | 4962 | 4  | 4  | 4  | 6.4  | 6.4  | 6.4    | 101.56 | 0.0018 | 3.1566  | 11166000  | 8     | 11.84 | 13.76 | 13.40 | 15.10 | 16.36 | 13.18 | 17.01 | 16.37 |
| 2.115 | -2.23 | 0.21 | Q8R1F0 | Leydig cell tumor 10 kDa protein homolog                                   | DLEED1738e | 3765 | 5  | 5  | 5  | 30.9 | 30.9 | 30.9   | 10.197 | 0.0000 | 4.7779  | 5324000   | 48    | 13.37 | 14.07 | 12.70 | 14.62 | 16.09 | 15.92 | 15.84 | 16.74 |
| 2.909 | -2.24 | 0.21 | Q9CPN8 | Insulin-like growth factor 2 mRNA-binding protein 3                        | Igf2bp3    | 4522 | 12 | 12 | 11 | 30.7 | 30.7 | 28.5   | 63.574 | 0.0000 | 35.384  | 7971800   | 81    | 13.66 | 13.36 | 14.23 | 13.27 | 15.41 | 15.25 | 16.63 | 16.18 |
| 1.024 | -2.24 | 0.21 | P31996 | Macrosialin                                                                | Cd68       | 992  | 5  | 5  | 5  | 13.5 | 13.5 | 13.5   | 34.817 | 0.0002 | 6.0657  | 52814000  | 60    | 17.78 | 17.65 | 13.57 | 16.17 | 19.05 | 19.29 | 16.85 | 18.94 |
| 1.652 | -2.25 | 0.21 | Q9CPU9 | Probable low affinity copper uptake protein 1                              | SLC31a2    | 4537 | 1  | 1  | 1  | 17.5 | 17.5 | 17.5   | 16.069 | 0.0000 | 54.272  | 8638300   | 66    | 12.22 | 15.43 | 14.24 | 12.82 | 16.03 | 16.21 | 15.94 | 15.52 |
| 3.380 | -2.27 | 0.21 | Q9VD11 | Epithelial-stromal interaction protein 1                                   | Epiat1     | 3954 | 5  | 5  | 5  | 18.8 | 18.8 | 18.8   | 36.098 | 0.0000 | 11.815  | 3628100   | 30    | 12.39 | 12.96 | 13.27 | 13.36 | 15.01 | 14.88 | 15.25 | 15.93 |
| 1.120 | -2.27 | 0.21 | Q9Z266 | SNARE-associated protein Snapin                                            | Snapin     | 5832 | 6  | 6  | 6  | 72.8 | 72.8 | 72.8   | 14.904 | 0.0000 | 146.41  | 20095000  | 96    | 16.73 | 17.37 | 12.91 | 14.44 | 17.10 | 18.16 | 17.37 | 17.91 |
| 1.440 | -2.33 | 0.20 | Q9EPQ7 | SNARE-related lipid transfer protein 5                                     | Stard5     | 5261 | 6  | 6  | 6  | 30   | 30   | 30     | 23.922 | 0.0000 | 22.719  | 12724000  | 100   | 15.28 | 16.54 | 12.86 | 14.11 | 17.46 | 17.77 | 16.24 | 16.62 |
| 1.511 | -2.35 | 0.20 | Q9DB42 | Zinc finger protein 593                                                    | Znf593     | 5126 | 5  | 5  | 5  | 41   | 41   | 41     | 15.147 | 0.0000 | 23.496  | 7338400   | 70    | 13.11 | 15.90 | 14.81 | 14.22 | 16.76 | 17.28 | 16.10 | 17.21 |
| 3.711 | -2.37 | 0.19 | Q9P2K4 | TAFs-like RNA polymerase II p300/CBP-associated factor-associated 5 Tafi9  |            | 3808 | 3  | 3  | 3  | 6.7  | 6.7  | 6.7    | 67.235 | 0.0008 | 4.1507  | 2126400   | 16    | 13.08 | 12.56 | 13.17 | 13.60 | 15.22 | 16.03 | 15.43 | 15.30 |
| 1.897 | -2.41 | 0.19 | Q9CY57 | Chromatin target of PRMT1 protein                                          | Chtop      | 4786 | 8  | 8  | 8  | 34.1 | 34.1 | 34.1   | 26.585 | 0.0000 | 323.31  | 23239000  | 507   | 18.79 | 18.80 | 16.85 | 20.03 | 20.65 | 21.23 | 20.73 | 21.50 |
| 2.098 | -2.42 | 0.19 | Q9D773 | 39S ribosomal protein L2, mitochondrial                                    | Mpl2       | 5021 | 12 | 12 | 12 | 43.8 | 43.8 | 43.8   | 33.34  | 0.0000 | 176     | 30239000  | 186   | 14.25 | 15.82 | 13.18 | 15.43 | 16.79 | 17.54 | 17.05 | 16.97 |
| 1.677 | -2.47 | 0.18 | Q9D937 | Uncharacterized protein C11orf58 homolog                                   |            | 5092 | 6  | 6  | 6  | 41.5 | 41.5 | 41.5   | 14.098 | 0.0000 | 14.513  | 16939000  | 108   | 13.98 | 15.05 | 12.52 | 15.85 | 17.07 | 17.00 | 16.57 | 17.23 |
| 3.939 | -2.51 | 0.18 | Q9B550 | Histone-lysine N-methyltransferase 2B                                      | Kmt2b      | 271  | 14 | 14 | 14 | 7.5  | 7.5  | 7.5    | 294.82 | 0.0000 | 71.898  | 13973000  | 74    | 14.27 | 14.67 | 14.75 | 14.98 | 16.64 | 16.90 | 17.63 | 17.55 |
| 1.839 | -2.61 | 0.16 | Q9BN91 | 39S ribosomal protein L34, mitochondrial                                   | Mpl34      | 4489 | 3  | 3  | 3  | 25   | 25   | 25     | 10.531 | 0.0004 | 4.6748  | 8182800   | 42    | 14.99 | 14.90 | 12.59 | 14.49 | 17.18 | 17.82 | 17.04 | 15.37 |
| 0.919 | -2.72 | 0.15 | Q9R1Q7 | Protoclipid protein 2                                                      | Ptp2       | 5658 | 2  | 2  | 2  | 21.1 | 21.1 | 21.1   | 16.607 | 0.0000 | 34.638  | 71457000  | 118   | 18.70 | 19.47 | 12.75 | 16.87 | 19.37 | 19.76 | 19.76 | 19.80 |
| 0.890 | -2.75 | 0.15 | Q8CJ40 | Roodletin                                                                  | Croc       | 3566 | 6  | 6  | 6  | 3    | 3    | 3      | 226.94 | 0.0044 | 2.4043  | 121400000 | 45    | 20.82 | 20.41 | 14.36 | 13.55 | 20.06 | 20.11 | 19.95 | 20.02 |
| 2.524 | -2.76 | 0.15 | Q9DCG9 | Multifunctional methyltransferase subunit TRM112-like protein              | Tmtt112    | 5212 | 3  | 3  | 3  | 31.2 | 31.2 | 31.2   | 14.141 | 0.0000 | 9.6226  | 8907200   | 67    | 14.93 | 15.74 | 13.54 | 13.53 | 16.96 | 17.49 | 16.90 | 17.52 |
| 5.731 | -2.79 | 0.14 | P61166 | Transmembrane protein 258                                                  | Tmem258    | 1374 | 2  | 2  | 2  | 10.1 | 10.1 | 10.1   | 9.0788 | 0.0009 | 3.658   | 3167600   | 28    | 13.11 | 13.78 | 13.20 | 13.33 | 16.10 | 16.27 | 16.18 | 16.06 |
| 1.844 | -2.83 | 0.14 | Q8K117 | WAS/WASL-interacting protein family member 1                               | Wipf1      | 3628 | 10 | 10 | 10 | 24.9 | 24.9 | 24.9   | 50.08  | 0.0000 | 21.263  | 31171000  | 123   | 15.24 | 17.10 | 14.75 | 13.24 | 18.11 | 17.95 | 17.25 | 18.32 |
| 1.717 | -3.03 | 0.12 | Q8BSL7 | ADP-ribosylation factor 2                                                  | Arf2       | 3189 | 10 | 1  | 1  | 59.7 | 5.5  | 20.746 | 0.0048 | 2.3505 | 9208400 | 27        | 12.75 | 11.58 | 12.98 | 11.89 | 16.15 | 12.67 | 15.98 | 16.51 |       |
| 2.502 | -3.05 | 0.12 | Q9I249 | UAP56-interacting factor                                                   | Fytd1      | 4186 | 15 | 15 | 15 | 41   | 41   | 41     | 35.887 | 0.0000 | 119.67  | 28629000  | 162   | 13.72 | 15.03 | 13.83 | 16.28 | 17.44 | 18.19 | 17.39 | 18.04 |
| 1.321 | -3.06 | 0.12 | O82803 |                                                                            |            | 518  | 16 | 16 | 16 | 91.2 | 91.2 | 91.2   | 22.344 | 0.0000 | 238.41  | 41075000  | 123   | 9.77  | 13.38 | 10.99 | 11.94 | 16.06 | 15.36 | 11.73 | 15.17 |
| 1.239 | -3.07 | 0.12 | Q5U4C3 | Splicing factor, arginine/serine-rich 19                                   | Scaf1      | 2165 | 5  | 5  | 5  | 5.4  | 5.4  | 5.4    | 133.84 | 0.0000 | 6.8592  | 40772000  | 9     | 17.56 | 18.48 | 14.46 | 12.96 | 19.25 | 19.19 | 18.39 | 18.90 |
| 2.026 | -3.17 | 0.11 | P62862 | 40S ribosomal protein S30                                                  | Fau        | 1457 | 4  | 4  | 4  | 33.9 | 33.9 | 33.9   | 6.6478 | 0.0002 | 5.6694  | 102650000 | 102   | 17.27 | 19.80 | 15.94 | 16.75 | 20.91 | 20.59 | 20.34 | 20.59 |
| 2.062 | -3.20 | 0.11 | P61804 | Dolichyl-diphosphooligosaccharide-protein glycosyltransferase subunit Dad1 | Dad1       | 1390 | 2  | 2  | 2  | 19.5 | 19.5 | 19.5   | 12.497 | 0.0002 | 6.0643  | 7126900   | 46    | 12.20 | 14.86 | 14.24 | 11.95 | 16.27 | 17.36 | 15.48 | 16.95 |
| 0.950 | -3.30 | 0.10 | O35682 | Myeloid-associated differentiation marker                                  | Myadm      | 397  | 3  | 3  | 3  | 10.9 | 10.9 | 10.9   | 35.284 | 0.0000 | 82.263  | 52616000  | 141   | 18.29 | 18.93 | 13.03 | 12.03 | 18.65 | 18.93 | 19.13 | 18.78 |

list of proteins in L2 samples:

log2 transformed LFQ intensity values (after removal of contaminants), missing values imputation from normal distribution (shift: 1.6; width: 0.4)

statistical test: two-sided t-test with a p-value of 0.05 and so of 1 and permutation-based FDR of 5 % (250 normalizations for multi-testing correction)

| Significant | neg. log(p-value) | Difference (log2(p)-log2(np)) | fold change (p/np) | Protein IDs | Protein names                                                   | Gene names                          | id    | Peptides | Razor + unique peptides | Unique peptides | Sequence coverage [%] | Unique + razor sequence coverage [%] | Unique sequence coverage [%] | Mol. weight [kDa] | Q-value | Score    | Intensity | MS/MS count | log2 transformed LFQ intensity values |       |       |       |          |       |       |       |       |
|-------------|-------------------|-------------------------------|--------------------|-------------|-----------------------------------------------------------------|-------------------------------------|-------|----------|-------------------------|-----------------|-----------------------|--------------------------------------|------------------------------|-------------------|---------|----------|-----------|-------------|---------------------------------------|-------|-------|-------|----------|-------|-------|-------|-------|
|             |                   |                               |                    |             |                                                                 |                                     |       |          |                         |                 |                       |                                      |                              |                   |         |          |           |             | probe                                 |       |       |       | no probe |       |       |       |       |
|             |                   |                               |                    |             |                                                                 |                                     |       |          |                         |                 |                       |                                      |                              |                   |         |          |           |             | L1+1                                  | L1+2  | L1+4  | L1-1  | L1-2     | L1-3  | L1-4  |       |       |
| *           | 2.850             | 9.35                          | 651.07             | P35492      | Histidine ammonia-lyase                                         | Hial                                | 1022  | 44       | 44                      | 44              | 68                    | 68                                   | 68                           | 72.257            | 0.0000  | 323.31   | 146750000 | 393         | 19.03                                 | 18.74 | 19.28 | 9.47  | 11.78    | 6.26  | 11.16 |       |       |
| *           | 1.447             | 5.94                          | 61.28              | Q09273      | Non-lysosomal glucosylceramidase                                | Gba2                                | 248   | 4        | 4                       | 4               | 3                     | 4.9                                  | 4.9                          | 4.9               | 103.29  | 0.0000   | 5.3502    | 239110000   | 28                                    | 20.84 | 20.30 | 20.63 | 12.77    | 14.05 | 19.78 | 12.62 |       |
| *           | 2.571             | 5.65                          | 50.24              | O35309      | N-myc-interactor                                                | Nmi                                 | 355   | 4        | 4                       | 4               | 4                     | 18.5                                 | 18.5                         | 18.5              | 35.235  | 0.0002   | 5.4976    | 76893000    | 32                                    | 19.94 | 16.49 | 19.54 | 12.98    | 13.43 | 13.71 | 11.90 |       |
| *           | 3.258             | 5.16                          | 35.84              | Q8VHQ9      | Acyl-coenzyme A thioesterase 11                                 | Acot11                              | 4023  | 17       | 17                      | 17              | 17                    | 42.9                                 | 42.9                         | 42.9              | 67.354  | 0.0000   | 323.31    | 67820000    | 316                                   | 16.52 | 16.72 | 16.48 | 12.49    | 12.16 | 10.89 | 10.89 |       |
| *           | 4.560             | 4.78                          | 27.48              | Q9R118      | Serine protease HTRA1                                           | Htra1                               | 5647  | 21       | 21                      | 21              | 21                    | 45.2                                 | 45.2                         | 45.2              | 51.213  | 0.0000   | 202.98    | 42152000    | 249                                   | 17.51 | 17.54 | 17.13 | 11.94    | 12.46 | 13.02 | 13.03 |       |
| *           | 2.660             | 4.75                          | 26.87              | P63369      | Tubulin alpha-1A chain                                          | Tuba1a                              | 1517  | 36       | 4                       | 1               | 10.2                  | 3.1                                  | 50.135                       | 0.0000            | 79.59   | 72237000 | 136       | 19.36       | 18.79                                 | 18.67 | 16.20 | 14.04 | 13.21    | 13.45 |       |       |       |
| *           | 3.575             | 4.55                          | 23.38              | A2AJ03      | Probable C-mannosyltransferase DPY19L4                          | Dpy19l4                             | 31    | 6        | 6                       | 6               | 13.9                  | 13.9                                 | 13.9                         | 83.603            | 0.0000  | 10.727   | 24855000  | 32          | 17.25                                 | 16.94 | 17.08 | 12.95 | 12.04    | 13.51 | 11.68 |       |       |
| *           | 4.635             | 4.46                          | 22.06              | P43024      | Cytochrome c oxidase subunit 6A1, mitochondrial                 | Cox6a1                              | 1085  | 4        | 4                       | 4               | 4                     | 59.5                                 | 59.5                         | 59.5              | 12.352  | 0.0000   | 101.82    | 42226000    | 101                                   | 17.81 | 17.69 | 18.37 | 13.97    | 13.12 | 13.68 | 13.20 |       |
| *           | 1.637             | 4.37                          | 20.72              | Q09005      | Sphingolipid delta(4)-desaturase DES1                           | Dega1                               | 316   | 5        | 5                       | 5               | 5                     | 16.1                                 | 16.1                         | 16.1              | 38.241  | 0.0000   | 76.185    | 59348000    | 138                                   | 19.06 | 18.88 | 18.71 | 17.89    | 13.86 | 12.95 | 13.36 |       |
| *           | 3.418             | 4.37                          | 20.66              | P70158      | Acid sphingomyelinase-like phosphodiesterase 3a                 | Smpld3a                             | 1529  | 15       | 15                      | 15              | 15                    | 42.2                                 | 42.2                         | 42.2              | 49.857  | 0.0000   | 323.31    | 50300000    | 384                                   | 17.10 | 17.28 | 17.10 | 13.95    | 12.95 | 12.29 | 11.96 |       |
| *           | 1.913             | 4.23                          | 18.70              | Q52324      | Splicing factor 3B subunit 5                                    | Sf3b5                               | 4283  | 6        | 6                       | 6               | 6                     | 68.6                                 | 68.6                         | 68.6              | 10.119  | 0.0000   | 146.14    | 43363000    | 177                                   | 17.47 | 18.14 | 18.14 | 13.10    | 11.39 | 14.75 | 15.53 |       |
| *           | 5.457             | 3.99                          | 15.94              | Q9ET22      | Dipeptidyl peptidase 2                                          | Dpp7                                | 5354  | 20       | 20                      | 20              | 20                    | 48.6                                 | 48.6                         | 48.6              | 56.253  | 0.0000   | 323.31    | 64630000    | 662                                   | 21.40 | 21.40 | 21.08 | 17.26    | 16.95 | 17.54 | 17.46 |       |
| *           | 3.670             | 3.99                          | 15.91              | Q61387      | Cytochrome c oxidase subunit 7A-related protein, mitochondrial  | Cox7a2l                             | 2295  | 5        | 5                       | 5               | 5                     | 62.2                                 | 62.2                         | 62.2              | 12.399  | 0.0000   | 58.59     | 44293000    | 39                                    | 16.83 | 16.78 | 16.94 | 13.64    | 12.62 | 12.01 | 13.17 |       |
| *           | 3.373             | 3.96                          | 15.55              | Q9CR67      | Transmembrane protein 33                                        | Tmem33                              | 4676  | 3        | 3                       | 3               | 3                     | 15.4                                 | 15.4                         | 15.4              | 28.031  | 0.0000   | 9.0279    | 17466000    | 39                                    | 17.29 | 17.21 | 17.22 | 14.02    | 12.79 | 13.92 | 12.40 |       |
| *           | 3.545             | 3.89                          | 14.85              | Q91W77      | Polychaete phosphatase                                          | Pcpa                                | 4108  | 6        | 6                       | 6               | 6                     | 7.7                                  | 7.7                          | 7.7               | 103.45  | 0.0000   | 24.906    | 29927000    | 36                                    | 18.15 | 17.22 | 18.16 | 14.26    | 14.22 | 14.25 | 13.07 |       |
| *           | 1.157             | 3.71                          | 13.09              | Q60648      | Ganglioside GM2 activator                                       | Gm2a                                | 2188  | 3        | 3                       | 3               | 3                     | 24.4                                 | 24.4                         | 24.4              | 20.824  | 0.0000   | 28.955    | 28250000    | 54                                    | 18.24 | 18.67 | 17.58 | 14.49    | 13.18 | 18.17 | 11.96 |       |
| *           | 1.373             | 3.69                          | 12.88              | Q9WVM3      | Anaphase-promoting complex subunit 7                            | Anapc7                              | 5758  | 5        | 5                       | 5               | 5                     | 13.5                                 | 13.5                         | 13.5              | 63.02   | 0.0000   | 7.876     | 31408000    | 38                                    | 17.83 | 17.63 | 18.76 | 17.66    | 12.55 | 13.73 | 13.61 |       |
| *           | 3.556             | 3.63                          | 12.36              | Q6A009      | E3 ubiquitin-protein ligase listerin                            | Ltn1                                | 2494  | 3        | 3                       | 3               | 3                     | 4.5                                  | 4.5                          | 4.5               | 198.92  | 0.0000   | 13.423    | 28419000    | 21                                    | 17.24 | 17.06 | 18.11 | 13.83    | 14.49 | 13.18 | 13.97 |       |
| *           | 5.037             | 3.57                          | 11.87              | P18675      | Lysosomal protective protein                                    | Lysosomal protective protein 32 kDa | Ctsa  | 813      | 21                      | 21              | 21                    | 43.2                                 | 43.2                         | 43.2              | 53.844  | 0.0000   | 323.31    | 164190000   | 1311                                  | 22.30 | 22.60 | 22.18 | 19.11    | 18.90 | 18.71 | 18.45 |       |
| *           | 3.055             | 3.56                          | 11.77              | Q9JUK9      | 24-hydroxycholesterol 7-alpha-hydroxylase                       | Cyp39a1                             | 5452  | 1        | 1                       | 1               | 1                     | 2.8                                  | 2.8                          | 2.8               | 53.574  | 0.0046   | 3.954     | 10979000    | 34                                    | 17.19 | 16.93 | 17.05 | 12.46    | 13.84 | 14.51 | 13.41 |       |
| *           | 3.876             | 3.42                          | 10.73              | Q6PE15      | Mycophenolic acid acyl-glucuronide esterase, mitochondrial      | Abhd10                              | 2623  | 17       | 17                      | 17              | 63.3                  | 63.3                                 | 63.3                         | 33.04             | 0.0000  | 164.24   | 32945000  | 154         | 16.73                                 | 17.06 | 16.30 | 13.92 | 12.90    | 13.25 | 13.03 |       |       |
| *           | 3.530             | 3.39                          | 10.47              | Q35298      | Acylglycyl hydrolase                                            | Acylglycyl hydrolase small subunit  | Acoah | 354      | 14                      | 14              | 14                    | 14                                   | 25.1                         | 25.1              | 25.1    | 65.154   | 0.0000    | 323.31      | 33884000                              | 152   | 15.83 | 16.16 | 16.10    | 13.17 | 13.07 | 12.54 | 11.80 |
| *           | 3.204             | 3.25                          | 10.50              | Q9J2D3      | Non-syndromic hearing impairment protein 5 homolog              | Hnf1a                               | 584   | 17       | 17                      | 17              | 58.4                  | 58.4                                 | 58.4                         | 17.6              | 0.0000  | 22.25    | 33232000  | 68          | 17.73                                 | 17.96 | 16.74 | 13.69 | 14.47    | 14.86 | 14.09 |       |       |
| *           | 0.966             | 3.24                          | 9.48               | P51908      | C->U-editing enzyme APOBEC-1                                    | Apoec1                              | 1209  | 7        | 7                       | 7               | 7                     | 29.7                                 | 29.7                         | 29.7              | 27.521  | 0.0000   | 36.896    | 28469000    | 109                                   | 19.08 | 19.01 | 18.29 | 12.83    | 13.30 | 13.18 | 16.90 |       |
| *           | 2.737             | 3.22                          | 9.33               | Q9CQV1      | Succinate dehydrogenase [ubiquinone] cytochrome b small subunit | Sdhb                                | 4769  | 3        | 3                       | 3               | 3                     | 11.3                                 | 11.3                         | 11.3              | 17.014  | 0.0000   | 10.838    | 9112200     | 20                                    | 17.26 | 15.66 | 16.40 | 12.45    | 13.97 | 13.19 | 13.26 |       |
| *           | 1.116             | 3.19                          | 9.12               | Q9QDM5      | Dynein light chain 2, cytoplasmic                               | Dynl2                               | 4880  | 9        | 6                       | 6               | 6                     | 74.2                                 | 43.8                         | 43.8              | 10.35   | 0.0000   | 137.53    | 18315000    | 146                                   | 16.49 | 16.59 | 16.79 | 13.15    | 16.91 | 12.25 | 11.43 |       |
| *           | 3.509             | 3.04                          | 8.22               | Q9CPU4      | Microsomal glutathione S-transferase 3                          | Mgst3                               | 4536  | 4        | 4                       | 4               | 4                     | 34                                   | 34                           | 34                | 16.958  | 0.0000   | 60.109    | 22417000    | 150                                   | 17.22 | 16.95 | 16.99 | 14.49    | 13.22 | 14.00 | 14.34 |       |
| *           | 0.770             | 2.98                          | 7.87               | P47955      | ROS acidic ribosomal protein P1                                 | Rplp1                               | 1179  | 79.8     | 79.8                    | 79.8            | 79.8                  | 11.476                               | 79.8                         | 79.8              | 11.476  | 0.0000   | 2.896     | 23862000    | 67                                    | 17.86 | 17.86 | 17.86 | 18.70    | 12.05 | 16.77 | 16.77 |       |
| *           | 1.268             | 2.97                          | 7.85               | Q6E205      | ATP-dependent RNA helicase DDX3Y                                | Ddx3y                               | 2356  | 35       | 3                       | 3               | 3                     | 47.3                                 | 6.1                          | 6.1               | 73.427  | 0.0000   | 63.04     | 46787000    | 155                                   | 17.68 | 17.26 | 17.97 | 12.98    | 12.93 | 16.12 | 16.61 |       |
| *           | 1.724             | 2.94                          | 7.69               | Q09043      | Napsin-A                                                        | Napsa                               | 318   | 2        | 2                       | 2               | 2                     | 12.4                                 | 12.4                         | 12.4              | 45.544  | 0.0000   | 44.592    | 5614100     | 31                                    | 16.62 | 17.48 | 14.83 | 13.98    | 12.44 | 14.37 | 12.69 |       |
| *           | 2.120             | 2.92                          | 7.58               | Q9JBL8      | 1-acylglycerol-3-phosphate O-acyltransferase ABHD5              | Abhd5                               | 5162  | 8        | 8                       | 8               | 8                     | 28.8                                 | 28.8                         | 28.8              | 39.154  | 0.0000   | 59.913    | 21456000    | 104                                   | 16.87 | 16.81 | 16.59 | 14.89    | 14.80 | 13.47 | 12.38 |       |
| *           | 0.770             | 2.89                          | 7.43               | Q9J2D5      | Non-syndromic hearing impairment protein 5 homolog              | Hnf1a                               | 584   | 4        | 4                       | 4               | 4                     | 2.8                                  | 2.8                          | 2.8               | 176.86  | 0.0025   | 2.896     | 23862000    | 46                                    | 18.58 | 18.11 | 17.98 | 18.40    | 17.48 | 12.88 | 16.21 |       |
| *           | 1.981             | 2.87                          | 7.29               | P41251      | Natural resistance-associated macrophage protein 1              | Sic11a1                             | 1070  | 2        | 2                       | 2               | 2                     | 4.9                                  | 4.9                          | 4.9               | 59.74   | 0.0000   | 6.6022    | 3576900     | 20                                    | 16.63 | 17.77 | 17.08 | 14.29    | 12.04 | 14.36 | 13.82 |       |
| *           | 2.028             | 2.83                          | 7.13               | Q7TMR0      | Lysosomal Pro-X carboxypeptidase                                | Prxp                                | 2749  | 14       | 14                      | 14              | 14                    | 29.1                                 | 29.1                         | 29.1              | 55.026  | 0.0000   | 119.84    | 114550000   | 206                                   | 16.70 | 16.73 | 16.26 | 12.03    | 14.01 | 14.50 | 14.37 |       |
| *           | 5.672             | 2.82                          | 7.08               | Q8BVG4      | Dipeptidyl peptidase 9                                          | Dpp9                                | 3239  | 41       | 41                      | 41              | 40                    | 57.4                                 | 57.4                         | 57.4              | 98      | 0.0000   | 323.31    | 162960000   | 699                                   | 19.14 | 18.97 | 19.00 | 16.28    | 16.31 | 15.94 | 16.32 |       |
| *           | 2.195             | 2.79                          | 6.93               | Q9R3R9      | UDP-GlcNAc-6-epi-Gal beta-1,3-N-acetylglucosaminyltransferase 8 | Cnpb                                | 3819  | 3        | 3                       | 3               | 3                     | 33.9                                 | 33.9                         | 33.9              | 43.37   | 0.0000   | 28.86     | 7539000     | 53                                    | 16.33 | 16.13 | 15.76 | 13.44    | 13.37 | 14.51 | 12.07 |       |
| *           | 1.818             | 2.77                          | 6.83               | Q9JNH8      | Triggering receptor expressed on myeloid cells 2                | Trem2                               | 4469  | 3        | 3                       | 3               | 3                     | 32.2                                 | 32.2                         | 32.2              | 24.527  | 0.0000   | 29.906    | 9404100     | 84                                    | 16.07 | 15.96 | 15.59 | 12.10    | 14.92 | 12.32 | 13.05 |       |
| *           | 1.214             | 2.75                          | 6.74               | Q9JLJ5      | Elongation of very long chain fatty acids protein 1             | Elovl1                              | 5484  | 4        | 4                       | 4               | 4                     | 10.8                                 | 10.8                         | 10.8              | 32.677  | 0.0000   | 22.876    | 21419000    | 82                                    | 17.94 | 17.83 | 17.33 | 16.30    | 13.30 | 16.88 | 13.30 |       |
| *           | 0.911             | 2.73                          | 6.65               | ABG756      | Thyroid adenoma-associated protein homolog                      | Thada                               | 6     | 3        | 3                       | 3               | 2.3                   | 2.3                                  | 2.3                          | 217.29            | 0.0086  | 1.8087   | 16430000  | 16          | 17.83                                 | 17.25 | 17.46 | 16.51 | 12.66    | 17.30 | 12.63 |       |       |
| *           | 1.882             | 2.72                          | 6.60               | Q6ZKX0      | Condensin-2 complex subunit D3                                  | Ncapd3                              | 2699  | 4        | 4                       | 4               | 4                     | 5.4                                  | 5.4                          | 5.4               | 169.43  | 0.0002   | 5.524     | 26334000    | 45                                    | 18.83 | 17.34 | 17.59 | 16.79    | 14.02 | 12.33 | 17.58 |       |
| *           | 1.617             | 2.70                          | 6.52               | Q1ADH3      | Leucine-rich repeat and IQ domain-containing protein 3          | Lrrig3                              |       |          |                         |                 |                       |                                      |                              |                   |         |          |           |             |                                       |       |       |       |          |       |       |       |       |

|   |       |      |      |           |                                                                                               |             |      |    |    |      |       |       |        |        |        |          |          |       |       |       |       |       |       |       |       |
|---|-------|------|------|-----------|-----------------------------------------------------------------------------------------------|-------------|------|----|----|------|-------|-------|--------|--------|--------|----------|----------|-------|-------|-------|-------|-------|-------|-------|-------|
| + | 1.926 | 2.03 | 4.08 | Q9JUD9    | SH2B adapter protein 2                                                                        | Sh2b2       | 5394 | 3  | 3  | 3    | 8.1   | 8.1   | 8.1    | 66.557 | 0.0000 | 74.052   | 5513000  | 33    | 15.41 | 14.30 | 15.45 | 13.88 | 13.34 | 12.50 | 12.39 |
| + | 0.738 | 2.03 | 4.07 | Q8C142    | Low density lipoprotein receptor adapter protein 1                                            | Ldlrap1     | 3351 | 4  | 4  | 4    | 21.1  | 21.1  | 21.1   | 33.975 | 0.0000 | 10.806   | 9718100  | 39    | 16.43 | 17.28 | 16.77 | 16.61 | 13.31 | 16.74 | 12.53 |
| + | 1.335 | 2.02 | 4.07 | P59108    | Copine-2                                                                                      | Cpne2       | 1330 | 10 | 9  | 9    | 21.7  | 21.7  | 21.7   | 61.035 | 0.0000 | 48.17    | 14027000 | 86    | 17.07 | 17.05 | 16.88 | 15.31 | 13.09 | 16.02 | 15.50 |
| + | 0.705 | 2.02 | 4.05 | A6X919    | Probable C-mannosyltransferase DPY19L1                                                        | Dpy19l1     | 605  | 5  | 5  | 5    | 10.9  | 10.9  | 10.9   | 84.196 | 0.0000 | 25.285   | 25290000 | 56    | 15.82 | 16.36 | 16.81 | 12.98 | 13.62 | 12.99 | 17.67 |
| + | 1.729 | 2.01 | 4.04 | Q9RL11    | Rescue alpha-L-fucosidase                                                                     | Fucf1       | 522  | 9  | 9  | 9    | 52.28 | 52.28 | 52.28  | 113.14 | 0.0000 | 17.114   | 19523000 | 171   | 17.22 | 16.68 | 17.22 | 14.51 | 14.61 | 14.50 | 14.58 |
| + | 1.352 | 2.01 | 4.02 | Q9D854    | Oligoribonuclease, mitochondrial                                                              | Rexo2       | 675  | 9  | 9  | 9    | 34.2  | 34.2  | 34.2   | 26.738 | 0.0000 | 35.032   | 14379000 | 63    | 16.08 | 16.01 | 16.58 | 13.80 | 12.78 | 14.56 | 15.73 |
| + | 1.933 | 2.00 | 4.00 | Q8JZK9    | Hydroxymethylglutaryl-CoA synthase, cytoplasmic                                               | Hmgcs1      | 3573 | 6  | 6  | 6    | 21.2  | 21.2  | 21.2   | 57.568 | 0.0000 | 26.945   | 4533900  | 51    | 15.73 | 14.71 | 15.09 | 12.68 | 14.25 | 13.19 | 12.58 |
| + | 1.375 | 1.99 | 3.98 | P97470    | Serine/threonine-protein phosphatase 4 catalytic subunit                                      | Ppp4c       | 1656 | 9  | 7  | 7    | 37.5  | 37.5  | 37.5   | 35.08  | 0.0000 | 36.433   | 16823000 | 60    | 16.29 | 17.30 | 15.82 | 14.53 | 13.22 | 15.85 | 14.32 |
| + | 1.842 | 1.98 | 3.95 | Q8BG50    | Protein MAK16 homolog                                                                         | Mak16       | 2990 | 4  | 4  | 4    | 22.6  | 22.6  | 22.6   | 35.185 | 0.0000 | 30.384   | 9331000  | 107   | 15.33 | 15.28 | 15.39 | 13.43 | 12.57 | 13.42 | 13.99 |
| + | 1.188 | 1.98 | 3.94 | Q7U309    | Integrin beta-5                                                                               | Itgb5       | 10   | 10 | 10 | 15.5 | 15.5  | 15.5  | 87.908 | 0.0000 | 72.623 | 23078000 | 118      | 15.62 | 15.72 | 14.60 | 13.57 | 13.94 | 12.39 | 13.79 |       |
| + | 2.173 | 1.98 | 3.94 | P07742    | Ribonucleoside-diphosphate reductase large subunit                                            | Rrm1        | 6762 | 19 | 19 | 19   | 36.4  | 36.4  | 36.4   | 90.209 | 0.0000 | 218.19   | 13964000 | 127   | 15.91 | 15.78 | 15.38 | 13.95 | 13.06 | 13.23 | 14.62 |
| + | 3.858 | 1.97 | 3.93 | Q3TVP5    | Inactive ubiquitin thioesterase FAM105A                                                       | Fam105a     | 1879 | 5  | 5  | 5    | 11    | 11    | 11     | 41.576 | 0.0000 | 8.311    | 5101200  | 23    | 15.56 | 15.34 | 15.27 | 13.49 | 13.55 | 13.64 | 12.98 |
| + | 3.309 | 1.97 | 3.91 | Q5JLK4    | NADH dehydrogenase [ubiquinone] 1 alpha subcomplex assembly                                   | Ndufa3      | 5454 | 3  | 3  | 3    | 30.8  | 30.8  | 30.8   | 20.733 | 0.0000 | 34.891   | 4181300  | 34    | 15.51 | 15.41 | 15.58 | 13.96 | 13.11 | 13.26 | 13.79 |
| + | 2.231 | 1.95 | 3.87 | Q6A435    | UDP-glucuronosyltransferase 1-6                                                               | Ugt1a6      | 2442 | 13 | 4  | 4    | 31.3  | 31.3  | 31.3   | 60.438 | 0.0000 | 13.465   | 5339700  | 63    | 15.70 | 15.59 | 15.59 | 13.19 | 14.50 | 13.62 | 12.91 |
| + | 3.131 | 1.94 | 3.85 | Q8BGD9    | Eukaryotic translation initiation factor 4B                                                   | Eif4b       | 2978 | 27 | 27 | 26   | 51.4  | 51.4  | 49.9   | 68.839 | 0.0000 | 162.39   | 44645000 | 257   | 17.40 | 18.15 | 17.65 | 16.19 | 15.88 | 15.45 | 15.64 |
| + | 2.757 | 1.94 | 3.84 | Q61239    | Protein farnesyltransferase/geranylgeranyltransferase type-1 subunit                          | Fnta        | 2284 | 19 | 19 | 19   | 53.1  | 53.1  | 53.1   | 44.013 | 0.0000 | 130.58   | 20787000 | 130   | 15.48 | 14.86 | 15.32 | 13.90 | 13.37 | 13.02 | 12.82 |
| + | 1.105 | 1.94 | 3.84 | Q4VAA2    | Protein CDV3                                                                                  | Cdv3        | 2067 | 11 | 11 | 11   | 48.4  | 48.4  | 46.3   | 29.729 | 0.0000 | 263.32   | 7775500  | 59    | 13.47 | 16.52 | 14.47 | 13.81 | 12.94 | 12.85 | 11.91 |
| + | 3.005 | 1.94 | 3.84 | Q04022    | CA-binding protein alpha chain                                                                | Cabpa       | 1896 | 2  | 2  | 2    | 7.5   | 7.5   | 7.5    | 51.344 | 0.0000 | 45.005   | 3786400  | 59    | 15.60 | 15.33 | 15.07 | 13.52 | 13.48 | 13.79 | 12.79 |
| + | 1.531 | 1.92 | 3.79 | O8B653    | Regulator complex protein LAMTOR3                                                             | Lamtor3     | 554  | 5  | 5  | 5    | 58.1  | 58.1  | 58.1   | 13.553 | 0.0000 | 30.438   | 7984100  | 66    | 15.39 | 15.34 | 15.63 | 15.07 | 12.72 | 12.90 | 13.43 |
| + | 0.780 | 1.89 | 3.70 | Q3TWL2    | Type 1 phosphatidylinositol 4,5-bisphosphate 4-phosphatase                                    | Tmem55b     | 1182 | 5  | 4  | 4    | 21.5  | 18    | 18     | 30.047 | 0.0000 | 31.298   | 8913000  | 89    | 15.86 | 15.72 | 15.68 | 12.48 | 11.87 | 15.57 | 15.55 |
| + | 2.296 | 1.89 | 3.70 | P48774    | Glutathione S-transferase Mu 5                                                                | Gstm5       | 1851 | 10 | 8  | 8    | 39.7  | 36.6  | 36.6   | 26.635 | 0.0000 | 21.619   | 7033300  | 86    | 15.21 | 14.86 | 15.13 | 12.95 | 12.43 | 13.37 | 13.97 |
| + | 0.741 | 1.88 | 3.69 | Q8CHP5    | Partner of V14 and mago                                                                       | Wlba        | 322  | 14 | 14 | 13   | 70.4  | 70.4  | 22.689 | 0.0000 | 141.08 | 11253000 | 99       | 12.08 | 15.85 | 13.19 | 11.05 | 13.76 | 11.01 | 11.47 |       |
| + | 1.346 | 1.88 | 3.69 | P10619    | Delta-aminolevulinic acid dehydratase                                                         | Alad        | 722  | 9  | 9  | 9    | 49.7  | 49.7  | 49.7   | 36.023 | 0.0000 | 110.04   | 24628000 | 110   | 21.05 | 21.54 | 21.00 | 21.83 | 20.85 | 13.80 | 21.84 |
| + | 2.684 | 1.88 | 3.67 | Q9JQZ7    | Acetyl-coenzyme A transporter 1                                                               | Slc33a1     | 4320 | 8  | 8  | 8    | 16.7  | 16.7  | 16.7   | 61.075 | 0.0000 | 17.2     | 5840100  | 42    | 15.56 | 14.75 | 14.83 | 13.46 | 13.13 | 12.62 | 13.48 |
| + | 0.177 | 1.86 | 3.64 | Q61176    | Arginase-1                                                                                    | Arg1        | 2268 | 3  | 3  | 3    | 11.5  | 11.5  | 11.5   | 34.807 | 0.0002 | 5.2487   | 4039200  | 11    | 15.37 | 17.22 | 15.14 | 14.16 | 13.16 | 13.02 | 15.84 |
| + | 1.976 | 1.86 | 3.63 | P15535    | Beta-1,4-galactosyltransferase 1,Lactose synthase A protein,N-acetylglucosaminyltransferase 1 | GalT1       | 799  | 5  | 5  | 5    | 13.5  | 13.5  | 13.5   | 44.115 | 0.0000 | 11.029   | 5956600  | 34    | 15.95 | 15.42 | 15.82 | 13.90 | 13.63 | 14.68 | 15.46 |
| + | 1.090 | 1.86 | 3.63 | Q9RL20    | Protein farnesyltransferase/geranylgeranyltransferase type-1 subunit                          | Fnta        | 4404 | 9  | 9  | 9    | 45.2  | 45.2  | 45.2   | 27.403 | 0.0000 | 67.933   | 17996000 | 68    | 16.35 | 15.66 | 16.30 | 16.06 | 14.24 | 12.97 | 15.71 |
| + | 3.125 | 1.86 | 3.62 | O8B455    | 7-dehydrocholesterol reductase                                                                | Dhcr7       | 532  | 2  | 2  | 2    | 5.3   | 5.3   | 5.3    | 53.918 | 0.0004 | 4.6489   | 4452700  | 28    | 15.33 | 15.34 | 15.16 | 13.37 | 13.98 | 13.40 | 12.95 |
| + | 1.512 | 1.85 | 3.61 | Q9D1C8    | Vacuolar protein sorting-associated protein 28 homolog                                        | Vps28       | 4905 | 10 | 10 | 10   | 62    | 62    | 62     | 25.452 | 0.0000 | 69.961   | 6125000  | 136   | 15.44 | 15.86 | 15.66 | 13.05 | 13.16 | 15.29 | 13.70 |
| + | 1.586 | 1.85 | 3.60 | O8BH8E    | Uncharacterized protein C2orf47 homolog, mitochondrial                                        | C2orf47     | 3034 | 4  | 4  | 4    | 16.5  | 16.5  | 16.5   | 32.985 | 0.0000 | 10.749   | 5493600  | 28    | 15.25 | 15.13 | 15.43 | 13.01 | 12.65 | 14.87 | 13.16 |
| + | 1.357 | 1.84 | 3.57 | Q3JUM1    | Protein phosphatase 1, regulatory subunit 12C                                                 | Ppp1r12c    | 2036 | 14 | 28 | 28   | 200   | 28    | 28     | 84.684 | 0.0000 | 27.179   | 5494500  | 28    | 15.08 | 15.46 | 13.81 | 12.73 | 13.01 | 15.19 | 15.19 |
| + | 2.287 | 1.84 | 3.57 | P62700    | Protein yippee-like 5                                                                         | Ypel5       | 1435 | 3  | 3  | 3    | 33.1  | 33.1  | 33.1   | 13.841 | 0.0000 | 34.357   | 2775200  | 35    | 14.78 | 15.51 | 15.07 | 13.81 | 12.96 | 12.55 | 12.48 |
| + | 0.835 | 1.83 | 3.56 | Q810U5    | Coiled-coil domain-containing protein 50                                                      | Ccdc50      | 2932 | 13 | 13 | 13   | 42.6  | 42.6  | 42.6   | 35.321 | 0.0000 | 30.798   | 6662600  | 43    | 12.85 | 16.02 | 14.96 | 12.71 | 11.23 | 14.24 | 12.93 |
| + | 2.135 | 1.83 | 3.56 | O8BXA5    | Cleft lip and palate transmembrane protein 1-like protein                                     | Cleft1n1    | 3284 | 2  | 2  | 2    | 5.4   | 5.4   | 5.4    | 62.183 | 0.0000 | 9.7294   | 4953900  | 60    | 15.52 | 15.28 | 14.84 | 12.57 | 13.51 | 13.30 | 14.15 |
| + | 3.443 | 1.83 | 3.56 | O8BNC2    | Protein phosphatase 1, regulatory subunit 12C                                                 | Ppp1r12c    | 2036 | 14 | 28 | 28   | 200   | 28    | 28     | 84.684 | 0.0000 | 27.179   | 5494500  | 28    | 15.08 | 15.46 | 13.81 | 12.73 | 13.01 | 15.19 | 15.19 |
| + | 1.057 | 1.82 | 3.54 | A2AH22    | Activating molecule in BECN1-regulated autophagy protein 1                                    | Ambrn1      | 22   | 3  | 3  | 3    | 3.9   | 3.9   | 3.9    | 142.88 | 0.0000 | 21.942   | 9893100  | 25    | 16.04 | 16.44 | 16.46 | 16.01 | 13.75 | 12.86 | 15.35 |
| + | 1.367 | 1.82 | 3.54 | O35657    | Sialidase-1                                                                                   | Neu1        | 394  | 5  | 5  | 5    | 21.8  | 21.8  | 21.8   | 44.591 | 0.0000 | 32.185   | 4509200  | 62    | 15.08 | 14.77 | 14.99 | 12.35 | 12.28 | 13.12 | 14.73 |
| + | 0.788 | 1.82 | 3.54 | Q9JKV5    | Secretory carrier-associated membrane protein 4                                               | Scamp4      | 5460 | 2  | 2  | 2    | 17.4  | 17.4  | 17.4   | 25.342 | 0.0002 | 6.0221   | 3886700  | 21    | 15.54 | 15.10 | 15.18 | 15.89 | 11.32 | 13.32 | 13.27 |
| + | 3.376 | 1.81 | 3.51 | O8VQY1    | Protein phosphatase 1, regulatory subunit 12C                                                 | Ppp1r12c    | 2036 | 14 | 28 | 28   | 200   | 28    | 28     | 84.684 | 0.0000 | 27.179   | 5494500  | 28    | 15.08 | 15.46 | 13.81 | 12.73 | 13.01 | 15.19 | 15.19 |
| + | 1.702 | 1.81 | 3.50 | Q9RIJ2    | Tropomyosin alpha-4 chain                                                                     | Tpm4        | 1519 | 15 | 14 | 14   | 75.8  | 70.6  | 70.6   | 28.467 | 0.0000 | 89.828   | 18402000 | 144   | 15.62 | 16.03 | 16.04 | 14.41 | 14.82 | 12.85 | 14.25 |
| + | 2.639 | 1.80 | 3.48 | O8BQU5    | Cyclin-Y                                                                                      | Ccnv        | 2995 | 3  | 3  | 3    | 12    | 12    | 12     | 39.394 | 0.0000 | 14.4     | 5850200  | 80    | 15.37 | 15.23 | 14.96 | 13.81 | 13.26 | 13.76 | 12.72 |
| + | 1.566 | 1.79 | 3.47 | Q3TCN2    | Putative phospholipase B-like 2;Putative phospholipase B-like 2                               | Pfbd2       | 1828 | 12 | 12 | 12   | 27.9  | 27.9  | 27.9   | 66.289 | 0.0000 | 166.15   | 27345000 | 212   | 17.09 | 16.47 | 16.48 | 14.66 | 13.72 | 15.93 | 15.25 |
| + | 2.612 | 1.79 | 3.46 | O8BWMU    | Prostaglandin E synthase 2;Prostaglandin E synthase 2 truncated                               | Ptges2      | 3562 | 8  | 8  | 8    | 34.6  | 34.6  | 34.6   | 43.323 | 0.0000 | 145.95   | 12733000 | 137   | 15.95 | 15.78 | 15.96 | 14.62 | 13.71 | 13.58 | 14.49 |
| + | 0.820 | 1.79 | 3.45 | A6D120    | Protein phosphatase 1, regulatory subunit 12C                                                 | Ppp1r12c    | 2036 | 14 | 28 | 28   | 200   | 28    | 28     | 84.684 | 0.0000 | 27.179   | 5494500  | 28    | 15.08 | 15.46 | 13.81 | 12.73 | 13.01 | 15.19 | 15.19 |
| + | 0.820 | 1.78 | 3.44 | O55101    | Synaptophysin-2                                                                               | Synp2       | 452  | 2  | 2  | 2    | 12.9  | 12.9  | 12.9   | 24.778 | 0.0000 | 26.998   | 20013000 | 37    | 17.26 | 18.03 | 14.94 | 13.26 | 14.95 | 15.88 | 15.74 |
| + | 3.675 | 1.78 | 3.43 | P11609.P1 | Antigen-presenting glycoprotein CD1d1;Antigen-presenting glycoprotein CD1d1                   | Cd1d1,Cd1d2 | 747  | 2  | 2  | 2    | 4.8   | 4.8   | 4.8    | 38.554 | 0.0000 | 8.8268   | 2101100  | 39    | 14.52 | 14.72 | 14.88 | 12.90 | 12.66 | 13.32 | 12.84 |
| + | 1.505 | 1.78 | 3.43 | Q9XQMU    | Abhydrolase domain-containing protein 2                                                       | Ahdh2       | 5546 | 4  | 4  | 4    | 16.8  | 16.8  | 16.8   | 48.377 | 0.0000 | 49.863   | 4484500  | 52    | 15.74 | 15.31 | 15.78 | 14.60 | 12.38 | 14.05 | 14.27 |
| + | 1.337 | 1.77 | 3.41 | Q7BXC5    | Oligosaccharyltransferase complex subunit OSTC                                                | Ostc        | 1817 | 18 | 18 | 18   | 18.1  | 18.1  | 18.1   | 16.815 | 0.0000 | 17.611   | 23818000 | 127   | 17.02 | 16.08 | 16.81 | 14.39 | 13.71 | 16.17 | 15.19 |
| + | 2.775 | 1.76 | 3.40 | O9C0E7    | Endoplasmic reticulum-Golgi intermediate compartment protein 3                                | Ergic3      | 4590 | 6  | 6  | 6    | 17    | 17    | 17     | 43.208 | 0.0000 | 21.273   | 4819900  | 56    | 15.21 | 14.94 | 14.72 | 13.63 | 13.48 | 12.66 | 13.00 |
| + | 0.944 | 1.76 | 3.38 | Q91WU5    | Arsenite methyltransferase                                                                    | As3mt       | 4129 | 5  | 5  | 5    | 19.7  | 19.7  | 19.7   | 41.793 | 0.0000 | 33.161   | 9        |       |       |       |       |       |       |       |       |

|  |       |      |      |        |                                                                                   |          |      |      |      |      |      |      |      |        |        |         |          |       |       |       |       |       |       |       |       |
|--|-------|------|------|--------|-----------------------------------------------------------------------------------|----------|------|------|------|------|------|------|------|--------|--------|---------|----------|-------|-------|-------|-------|-------|-------|-------|-------|
|  | 1.099 | 1.53 | 2.90 | Q9DCD6 | Gamma-aminobutyric acid receptor-associated protein                               | Gabaraap | 5209 | 4    | 4    | 3    | 26.5 | 26.5 | 12   | 13.918 | 0.0000 | 8.5303  | 8154200  | 96    | 15.31 | 15.43 | 15.48 | 13.26 | 12.52 | 14.69 | 15.02 |
|  | 0.551 | 1.53 | 2.89 | Q8BGK6 | Y+L amino acid transporter 2                                                      | Sic7a6   | 2986 | 3    | 3    | 2    | 9.7  | 9.7  | 8.3  | 56.77  | 0.0000 | 31.551  | 11291000 | 60    | 16.40 | 16.23 | 16.06 | 16.36 | 13.37 | 16.67 | 12.39 |
|  | 0.801 | 1.52 | 2.87 | Q9CR82 | HuACA ribonucleoprotein complex subunit 2                                         | Nhp2     | 4687 | 3    | 3    | 3    | 23.5 | 23.5 | 23.5 | 17.247 | 0.0000 | 24.463  | 10764000 | 119   | 15.13 | 15.46 | 15.40 | 16.09 | 12.95 | 13.42 | 12.78 |
|  | 1.841 | 1.52 | 2.86 | Q9BJX3 | Golgi reassembly-stacking protein 2                                               | Gorasp2  | 4353 | 4    | 4    | 4    | 16   | 16   | 18   | 47.038 | 0.0000 | 31.033  | 7590300  | 79    | 15.53 | 15.83 | 15.71 | 14.90 | 13.50 | 14.61 | 13.60 |
|  | 0.711 | 1.51 | 2.85 | Q8BYAT | 2,858 peptidase B                                                                 | Pept2    | 2902 | 24   | 24   | 21   | 25.4 | 25.4 | 24.6 | 102.18 | 0.0000 | 70.131  | 33327000 | 242   | 16.13 | 16.30 | 15.94 | 12.70 | 12.77 | 13.69 | 13.69 |
|  | 0.855 | 1.50 | 2.84 | Q8OU70 | Polycarb protein Suz12                                                            | Suz12    | 4282 | 4    | 4    | 4    | 8.1  | 8.1  | 8.1  | 83.025 | 0.0000 | 16.602  | 9237300  | 24    | 16.42 | 16.02 | 16.10 | 15.24 | 13.62 | 16.44 | 13.70 |
|  | 2.671 | 1.50 | 2.83 | Q9MD09 | Nuclear autoantigenic sperm protein                                               | Nasp     | 4462 | 7    | 7    | 7    | 12.5 | 12.5 | 12.5 | 83.953 | 0.0000 | 28.999  | 5288600  | 79    | 15.17 | 15.18 | 15.24 | 13.96 | 13.10 | 13.65 | 14.06 |
|  | 2.561 | 1.50 | 2.83 | Q8VEB4 | Group XV phospholipase A2                                                         | Pla2g15  | 3998 | 12   | 12   | 12   | 29.9 | 29.9 | 29.9 | 47.307 | 0.0000 | 74.845  | 84748000 | 235   | 16.95 | 17.03 | 17.01 | 15.77 | 14.80 | 15.69 | 15.71 |
|  | 0.466 | 1.50 | 2.83 | Q8CDM1 | Phosphoribosyl pyrophosphate synthase-associated protein 1                        | Ppsap1   | 4878 | 16   | 14   | 14   | 58.1 | 54.2 | 54.2 | 39.431 | 0.0000 | 95.453  | 64687000 | 209   | 18.04 | 18.17 | 18.59 | 18.48 | 13.24 | 16.10 | 17.24 |
|  | 1.433 | 1.50 | 2.83 | Q9QDQ3 | Mitochondrial pyruvate carrier 2                                                  | Mpc2     | 4850 | 4    | 4    | 4    | 30.7 | 30.7 | 30.7 | 14.286 | 0.0000 | 14.194  | 7034600  | 63    | 15.03 | 14.66 | 14.69 | 14.29 | 12.82 | 12.82 | 13.70 |
|  | 1.627 | 1.50 | 2.83 | Q5O528 | [3-methyl-2-oxobutanoate dehydrogenase (lipoamide)] kinase, mitochondrial         | Bckdk    | 4850 | 9    | 9    | 9    | 34.2 | 34.2 | 36.7 | 46.587 | 0.0000 | 87.174  | 6868800  | 59    | 16.06 | 14.95 | 15.05 | 12.94 | 14.07 | 14.22 | 14.18 |
|  | 1.157 | 1.49 | 2.81 | Q3TRM4 | Neuropathy target esterase                                                        | Pnp1a6   | 1871 | 17   | 16   | 16   | 17.2 | 16.6 | 16.6 | 140.54 | 0.0000 | 126.55  | 12300000 | 130   | 14.67 | 14.32 | 13.86 | 12.15 | 14.15 | 13.05 | 11.82 |
|  | 1.060 | 1.49 | 2.81 | Q8OU95 | Ubiquitin-protein ligase E3C                                                      | Ube3c    | 2827 | 5    | 5    | 5    | 7.7  | 7.7  | 7.7  | 123.97 | 0.0000 | 12.096  | 13068000 | 39    | 17.32 | 16.39 | 16.60 | 16.30 | 14.05 | 16.14 | 14.62 |
|  | 2.194 | 1.49 | 2.81 | Q9R158 | Caprin7                                                                           | Caprin7  | 5662 | 7    | 7    | 7    | 13.9 | 13.9 | 13.9 | 92.663 | 0.0000 | 50.577  | 8511363  | 93    | 16.81 | 14.76 | 15.93 | 13.30 | 12.59 | 13.30 | 13.30 |
|  | 2.094 | 1.48 | 2.80 | P97300 | Neuropilin                                                                        | Npfn     | 1618 | 5    | 5    | 5    | 16.1 | 16.1 | 16.1 | 44.373 | 0.0000 | 7.5884  | 4532000  | 32    | 14.97 | 15.06 | 14.08 | 12.95 | 13.64 | 13.45 | 12.83 |
|  | 0.615 | 1.48 | 2.79 | Q8C406 | Axin interactor, dorsalization-associated protein                                 | Aida     | 3387 | 6    | 6    | 6    | 28.5 | 28.5 | 28.5 | 34.888 | 0.0000 | 15.8504 | 51252000 | 43    | 16.60 | 16.96 | 17.34 | 15.74 | 17.09 | 12.81 | 16.30 |
|  | 3.148 | 1.47 | 2.78 | Q8BFY6 | Peflin                                                                            | Peff     | 2952 | 8    | 8    | 8    | 38.2 | 38.2 | 38.2 | 29.227 | 0.0000 | 194.48  | 19369000 | 198   | 16.59 | 16.37 | 16.21 | 14.54 | 15.22 | 15.08 | 14.84 |
|  | 2.829 | 1.47 | 2.77 | Q9Z2H5 | Band 4.1-like protein 1                                                           | Apb411   | 5353 | 9    | 9    | 9    | 14.6 | 14.6 | 14.6 | 98.314 | 0.0000 | 42.496  | 5428900  | 62    | 14.91 | 14.50 | 14.78 | 13.74 | 13.94 | 12.89 | 13.24 |
|  | 0.996 | 1.47 | 2.77 | Q6P2B1 | Transporthin-3                                                                    | Tnp03    | 2556 | 11   | 11   | 11   | 19.9 | 19.9 | 19.9 | 104.17 | 0.0000 | 78.495  | 7308400  | 58    | 16.05 | 15.47 | 15.31 | 14.72 | 12.95 | 15.37 | 15.53 |
|  | 1.125 | 1.47 | 2.77 | Q04230 | H-2 class II histocompatibility antigen, E-B beta chain                           | H2-Eb1   | 639  | 5    | 5    | 2    | 20.1 | 20.1 | 8    | 30.166 | 0.0000 | 13.12   | 6785900  | 31    | 14.22 | 14.03 | 15.12 | 12.61 | 12.07 | 14.40 | 12.88 |
|  | 0.371 | 1.47 | 2.76 | Q8CIV2 | Membralin                                                                         | Tmem259  | 3562 | 3    | 3    | 3    | 6.8  | 6.8  | 6.8  | 30.656 | 0.0000 | 6.5267  | 30502000 | 25    | 18.13 | 17.88 | 18.33 | 12.38 | 12.07 | 17.73 | 18.28 |
|  | 1.396 | 1.46 | 2.76 | Q3S587 | Calumenin                                                                         | Calu     | 5389 | 6    | 6    | 6    | 40.9 | 40.9 | 21   | 77.063 | 0.0000 | 13.669  | 4702600  | 42    | 14.61 | 14.98 | 15.63 | 13.89 | 13.63 | 12.71 | 14.48 |
|  | 2.362 | 1.46 | 2.74 | Q9DDY8 | 39S ribosomal protein L52, mitochondrial                                          | Mrlp52   | 4890 | 3    | 3    | 3    | 40.5 | 40.5 | 40.5 | 13.658 | 0.0000 | 9.7302  | 2971700  | 21    | 14.24 | 14.83 | 14.88 | 13.10 | 13.03 | 13.78 | 12.86 |
|  | 1.456 | 1.46 | 2.74 | Q8CC88 | von Willebrand factor A domain-containing protein 8                               | Vwa8     | 3444 | 35   | 35   | 35   | 27.6 | 27.6 | 27.6 | 213.42 | 0.0000 | 127.9   | 39382000 | 233   | 17.91 | 17.19 | 18.38 | 17.23 | 16.45 | 16.29 | 15.51 |
|  | 1.947 | 1.46 | 2.74 | Q01320 | DNA topoisomerase 2-alpha                                                         | Top2a    | 3472 | 18   | 8    | 8    | 12.6 | 12.6 | 6.2  | 172.79 | 0.0000 | 15.058  | 2687500  | 25    | 14.84 | 15.20 | 14.07 | 12.67 | 13.58 | 13.22 | 13.53 |
|  | 1.940 | 1.45 | 2.74 | PS3082 | Type protein ATPase 16 kDa proteolipid subunit                                    | Atpp0vc  | 3442 | 15   | 15   | 15   | 34.2 | 34.2 | 34.2 | 15.808 | 0.0000 | 215.98  | 22332000 | 437   | 19.79 | 20.38 | 18.51 | 16.88 | 19.42 | 18.02 | 18.02 |
|  | 2.983 | 1.45 | 2.74 | Q02819 | Nucleobindin-1                                                                    | Nucb1    | 1720 | 13   | 15   | 15   | 34   | 34   | 34   | 5.408  | 0.0000 | 83.253  | 12325000 | 16    | 15.38 | 15.67 | 15.58 | 15.41 | 14.21 | 15.58 | 14.30 |
|  | 1.553 | 1.45 | 2.74 | Q9CQ63 | 28S ribosomal protein S17, mitochondrial                                          | Mrlp17   | 4588 | 2    | 2    | 2    | 15   | 15   | 15   | 13.382 | 0.0025 | 2.8818  | 2051900  | 37    | 13.93 | 13.45 | 13.81 | 13.38 | 12.23 | 11.81 | 11.68 |
|  | 0.602 | 1.45 | 2.73 | Q8BGW1 | Alpha-ketoglutarate-dependent dioxygenase FTO                                     | Fto      | 2998 | 6    | 6    | 6    | 15.7 | 15.7 | 15.7 | 58.006 | 0.0000 | 14.802  | 9123300  | 49    | 16.18 | 14.71 | 17.62 | 16.08 | 13.49 | 15.52 | 12.45 |
|  | 1.994 | 1.45 | 2.73 | Q9DCV4 | Regulator of microtubule dynamics protein 1                                       | Rmdn1    | 5234 | 5    | 5    | 5    | 20.7 | 20.7 | 20.7 | 35.008 | 0.0000 | 4.0844  | 3914300  | 38    | 14.39 | 14.79 | 14.83 | 12.53 | 13.15 | 13.27 | 13.93 |
|  | 0.583 | 1.45 | 2.73 | Q2Z432 | Mothers against decapentaplegic homolog 2                                         | Md2      | 2362 | 20.6 | 22.9 | 22.9 | 20.6 | 20.6 | 22.9 | 52.265 | 0.0000 | 20.577  | 18992000 | 71    | 17.46 | 16.87 | 17.18 | 17.46 | 13.66 | 16.86 | 14.93 |
|  | 1.376 | 1.45 | 2.73 | Q8RUJ7 | Vacuolar protein sorting-associated protein 37B                                   | Vps37b   | 3761 | 2    | 2    | 2    | 10.2 | 10.2 | 10.2 | 31.055 | 0.0000 | 23.262  | 4094900  | 38    | 15.28 | 15.27 | 15.25 | 14.21 | 12.74 | 15.30 | 14.82 |
|  | 2.134 | 1.45 | 2.72 | Q64669 | NAD(P)H dehydrogenase [quinone] 1                                                 | Nqo1     | 2456 | 13   | 13   | 13   | 46.7 | 46.7 | 46.7 | 30.959 | 0.0000 | 36.503  | 28066000 | 218   | 17.32 | 17.12 | 17.16 | 15.05 | 16.34 | 16.01 | 15.62 |
|  | 0.541 | 1.44 | 2.72 | Q9JIG8 | PRA1 family protein 2                                                             | Praf2    | 5399 | 3    | 3    | 3    | 21.3 | 21.3 | 21.3 | 19.478 | 0.0000 | 26.795  | 7546900  | 52    | 15.90 | 15.77 | 15.14 | 16.56 | 15.12 | 12.41 | 12.87 |
|  | 1.575 | 1.44 | 2.71 | Q64430 | Nucleic acid transporting ATPase 1                                                | Natp1    | 1019 | 10.9 | 10.9 | 10.9 | 10.9 | 10.9 | 10.9 | 104.92 | 0.0000 | 81.3340 | 10492    | 147   | 15.91 | 15.90 | 15.06 | 15.06 | 14.50 | 15.06 | 14.50 |
|  | 1.070 | 1.44 | 2.70 | Q9CX84 | Regulator of G-protein signaling 19                                               | Rgs19    | 4749 | 5    | 5    | 5    | 34.7 | 34.7 | 34.7 | 24.677 | 0.0000 | 16.349  | 4195900  | 16    | 15.87 | 15.10 | 15.37 | 12.73 | 13.48 | 14.86 | 14.96 |
|  | 1.949 | 1.43 | 2.70 | Q9D086 | Protein PBDC1                                                                     | Pbdc1    | 4856 | 6    | 6    | 6    | 36.9 | 36.9 | 36.9 | 22.223 | 0.0000 | 10.611  | 3851200  | 23    | 15.09 | 14.78 | 14.41 | 13.01 | 13.01 | 13.13 | 14.15 |
|  | 1.418 | 1.43 | 2.69 | Q9CQA1 | Trafficking protein particle complex subunit 5                                    | Trappc5  | 4577 | 3    | 3    | 3    | 24.5 | 24.5 | 24.5 | 20.795 | 0.0004 | 5.2409  | 1372200  | 15    | 14.98 | 13.81 | 14.64 | 12.79 | 13.39 | 13.81 | 12.18 |
|  | 1.173 | 1.43 | 2.69 | Q9JUS7 | Abcd10                                                                            | Abcd10   | 5362 | 6    | 6    | 6    | 11.7 | 11.7 | 11.7 | 10.173 | 0.0000 | 20.417  | 4017700  | 33    | 15.48 | 15.08 | 15.05 | 13.44 | 13.68 | 13.68 | 12.78 |
|  | 0.499 | 1.43 | 2.69 | E9Q8I9 | Protein furry homolog                                                             | Fry      | 249  | 4    | 4    | 4    | 2.3  | 2.3  | 2.3  | 339.09 | 0.0002 | 5.5566  | 2379000  | 42    | 14.28 | 14.65 | 17.22 | 12.72 | 17.18 | 17.06 | 17.14 |
|  | 0.443 | 1.43 | 2.69 | Q61151 | Serine/threonine-protein phosphatase 2A 56 kDa regulatory subunit epsilon Ppp2r5e | Ppp2r5e  | 2260 | 10   | 10   | 8    | 27   | 27   | 20.8 | 54.713 | 0.0000 | 23.352  | 1956000  | 82    | 16.61 | 14.72 | 16.80 | 12.39 | 13.08 | 16.14 | 16.85 |
|  | 1.524 | 1.42 | 2.68 | Q62193 | Replication protein A 32 kDa subunit                                              | Rpa2     | 2368 | 6    | 6    | 6    | 40.7 | 40.7 | 40.7 | 29.718 | 0.0000 | 45.664  | 7932000  | 54    | 16.39 | 16.35 | 16.55 | 15.75 | 14.69 | 15.56 | 14.04 |
|  | 1.918 | 1.42 | 2.68 | Q9DBN1 | Carbonic anhydrase 13                                                             | Ca13     | 5004 | 4    | 4    | 4    | 24.4 | 24.4 | 24.4 | 29.522 | 0.0000 | 38.532  | 6242200  | 86    | 14.08 | 14.38 | 14.74 | 13.29 | 12.68 | 13.80 | 12.14 |
|  | 0.735 | 1.42 | 2.67 | Q8BW04 | Dynactin heavy chain 3, axonemal                                                  | Dnaht3   | 3257 | 1.4  | 1.4  | 1.4  | 1.4  | 1.4  | 1.4  | 46.777 | 0.0005 | 1.8173  | 8593200  | 15.62 | 15.82 | 15.42 | 15.86 | 15.09 | 12.88 | 15.86 | 14.94 |
|  | 0.584 | 1.42 | 2.67 | Q61072 | Disintegrin and metalloproteinase domain-containing protein 9                     | Adam9    | 2244 | 2    | 2    | 2    | 4.5  | 4.5  | 4.5  | 92.079 | 0.0000 | 34.098  | 4226800  | 48    | 15.22 | 14.83 | 15.10 | 12.54 | 13.91 | 12.76 | 15.31 |
|  | 1.744 | 1.41 | 2.66 | P97760 | DNA-directed RNA polymerase II subunit RPB3                                       | Poli2c   | 1667 | 3    | 3    | 3    | 17.8 | 17.8 | 17.8 | 31.443 | 0.0000 | 14.896  | 6315700  | 59    | 14.52 | 15.26 | 15.17 | 13.28 | 13.63 | 12.99 | 14.39 |
|  | 1.348 | 1.41 | 2.66 | Q9JKW0 | ADP-ribosylation factor-like protein 5-interacting protein 1                      | Atfip2   | 5461 | 6    | 6    | 6    | 30.5 | 30.5 | 30.5 | 23.437 | 0.0000 | 84.658  | 2819000  | 212   | 16.46 | 16.51 | 16.56 | 15.64 | 13.95 | 15.96 | 14.85 |
|  | 1.635 | 1.41 | 2.66 | Q9DX11 | Copper homeostasis protein catc1 homolog                                          | Cutc     | 5082 | 46.7 | 46.7 | 46.7 | 46.7 | 46.7 | 46.7 | 29.023 | 0.0000 | 65.843  | 3694800  | 65    | 14.86 | 14.37 | 14.66 | 13.28 | 13.22 | 13.91 | 12.12 |
|  | 1.779 | 1.41 | 2.65 | Q54965 | E3 ubiquitin-protein ligase RNF13                                                 | Rnf13    | 438  | 4    | 4    | 4    | 11.5 | 11.5 | 11.5 | 42.732 | 0.0000 | 16.104  | 3883300  | 37    | 13.79 | 14.92 | 14.52 | 12.31 | 13.37 | 13.30 | 13.04 |
|  | 0.867 | 1.40 | 2.64 | Q8BY99 | Protein O-glucosyltransferase 1                                                   | Poglut1  | 3296 | 7    | 7    | 7    | 19.6 | 19.6 | 19.6 | 46.379 | 0.0000 | 14.095  | 1020300  | 91    | 15.71 | 15.56 | 15.51 | 15.56 | 12.99 | 15.11 | 13.11 |
|  | 0.630 | 1.39 | 2.62 | P07704 | Phospholipid-transporting ATPase IA                                               | Atp8a1   | 1589 |      |      |      |      |      |      |        |        |         |          |       |       |       |       |       |       |       |       |

|       |      |      |            |                                                                        |             |      |    |    |    |      |        |       |          |        |        |          |        |          |       |       |       |       |       |       |       |       |
|-------|------|------|------------|------------------------------------------------------------------------|-------------|------|----|----|----|------|--------|-------|----------|--------|--------|----------|--------|----------|-------|-------|-------|-------|-------|-------|-------|-------|
| 0.754 | 1.26 | 2.40 | Q8VDC0     | Probable leucine--RNA ligase, mitochondrial                            | Lars2       | 3946 | 13 | 13 | 13 | 22.1 | 22.1   | 22.1  | 101.48   | 0.0000 | 83.804 | 10386000 | 117    | 14.73    | 14.71 | 15.46 | 14.43 | 11.93 | 14.91 | 13.55 |       |       |
| 2.615 | 1.26 | 2.39 | P27600     | Guanine nucleotide-binding protein subunit alpha-12                    | Gna12       | 935  | 9  | 8  | 8  | 29.8 | 27.7   | 27.7  | 44.095   | 0.0000 | 19.197 | 4855800  | 40     | 14.77    | 14.04 | 14.42 | 13.28 | 13.32 | 12.82 | 13.18 |       |       |
| 0.372 | 1.26 | 2.39 | Q9CJQ2     | PIH1 domain-containing protein 1                                       | Ph1d1       | 4604 | 6  | 6  | 5  | 24.1 | 21.7   | 21.7  | 32.208   | 0.0000 | 9.5625 | 25438000 | 30     | 17.95    | 18.33 | 18.73 | 16.97 | 18.97 | 13.69 | 18.69 |       |       |
| 1.684 | 1.26 | 2.39 | Q6Z018     | RNA polymerase-associated protein CTR9 homolog                         | Ctr9        | 2349 | 9  | 9  | 9  | 12.8 | 12.8   | 12.8  | 133.41   | 0.0000 | 48.939 | 5371200  | 87     | 14.44    | 14.16 | 14.17 | 13.00 | 12.14 | 13.28 | 13.88 |       |       |
| 1.610 | 1.25 | 2.39 | P14526     | RNA polymerase II subunit 2                                            | Ctr22       | 5913 | 17 | 10 | 7  | 69.3 | 25.716 | 22.47 | 10188000 | 0.0000 | 51.8   | 10188000 | 111    | 15.59    | 15.43 | 14.90 | 13.41 | 14.80 | 13.32 | 13.92 |       |       |
| 0.787 | 1.25 | 2.38 | Q6S5W8     | Pyroglutamy-peptidase 1                                                | Pgppe1      | 5346 | 5  | 5  | 5  | 12.6 | 41.6   | 42.6  | 22.934   | 0.0000 | 51.169 | 6572000  | 108    | 14.88    | 14.89 | 15.12 | 13.80 | 13.61 | 15.30 | 12.15 |       |       |
| 2.625 | 1.24 | 2.37 | Q9QUK3     | Protein CLN8                                                           | Cln8        | 5516 | 4  | 4  | 4  | 19.1 | 19.1   | 19.1  | 33.108   | 0.0000 | 53.579 | 3136800  | 35     | 15.37    | 15.73 | 14.89 | 14.06 | 14.19 | 13.90 | 14.21 |       |       |
| 1.431 | 1.24 | 2.37 | Q8QXN0     | D-beta-hydroxybutyrate dehydrogenase, mitochondrial                    | Bdh1        | 2887 | 11 | 11 | 11 | 40.5 | 40.5   | 40.5  | 38.299   | 0.0000 | 61.064 | 16512000 | 101    | 16.12    | 15.98 | 16.07 | 15.02 | 13.71 | 15.25 | 15.27 |       |       |
| 0.882 | 1.24 | 2.37 | Q8K1A5     | Transmembrane protein 41B                                              | Tmem41b     | 3620 | 2  | 2  | 2  | 9.6  | 9.6    | 9.6   | 32.420   | 0.0000 | 30.706 | 9615100  | 59     | 16.16    | 15.56 | 16.27 | 13.09 | 15.06 | 15.41 | 15.46 |       |       |
| 0.732 | 1.24 | 2.36 | Q70589     | Peripheral plasma membrane protein CASK                                | Cask        | 516  | 5  | 5  | 5  | 10.7 | 10.7   | 10.7  | 105.11   | 0.0000 | 14.373 | 3805200  | 39     | 14.78    | 14.70 | 14.83 | 14.87 | 11.86 | 14.70 | 13.70 |       |       |
| 0.228 | 1.24 | 2.36 | P84244.P02 | Histone H3.3.Histone H3.3C                                             | H3f3a.H3f3c | 1614 | 19 | 1  | 1  | 77.9 | 23.5   | 23.5  | 15.328   | 0.0000 | 30.105 | 44899000 | 102    | 18.07    | 18.00 | 12.28 | 13.47 | 12.35 | 17.65 | 17.24 |       |       |
| 0.614 | 1.24 | 2.36 | Q78HU3     | Multivesicular body subunit 12A                                        | Mvb12a      | 2721 | 4  | 4  | 4  | 19.2 | 19.2   | 19.2  | 28.705   | 0.0000 | 40.514 | 12318000 | 111    | 15.63    | 15.85 | 15.74 | 16.22 | 12.64 | 15.31 | 13.84 |       |       |
| 0.488 | 1.23 | 2.35 | Q8K7C3     | Membrane magnesium transporter 1                                       | Mmg1        | 3646 | 3  | 3  | 3  | 42.7 | 42.7   | 42.7  | 14.677   | 0.0000 | 74.281 | 11132000 | 66     | 16.01    | 15.89 | 15.21 | 16.05 | 15.76 | 14.10 | 11.98 |       |       |
| 1.094 | 1.23 | 2.34 | Q8R6P3     | Sulfotransferase-modifying factor 1                                    | Sumt1       | 3755 | 3  | 3  | 3  | 12.6 | 12.6   | 12.6  | 40.659   | 0.0000 | 8.15   | 4762200  | 36     | 15.17    | 15.78 | 15.63 | 15.46 | 13.56 | 14.62 | 15.40 |       |       |
| 1.089 | 1.23 | 2.34 | Q8B9J9     | Methylome protein 50                                                   | Wdr77       | 4316 | 5  | 5  | 5  | 28.4 | 28.4   | 28.4  | 36.942   | 0.0000 | 63.285 | 3297700  | 37     | 14.85    | 14.92 | 14.10 | 14.12 | 12.76 | 14.19 | 12.52 |       |       |
| 0.519 | 1.23 | 2.34 | Q3UE37     | Ubiquitin-conjugating enzyme E2 Z                                      | Ube2z       | 1953 | 6  | 6  | 6  | 24.7 | 24.7   | 24.7  | 38.368   | 0.0000 | 38.193 | 25067000 | 93     | 16.99    | 16.81 | 16.98 | 17.06 | 16.80 | 15.82 | 13.11 |       |       |
| 2.507 | 1.22 | 2.34 | Q9CRA5     | Golgi phosphoprotein 3                                                 | Golph3      | 4685 | 11 | 11 | 10 | 53.4 | 53.4   | 53.4  | 33.752   | 0.0000 | 83.948 | 13350500 | 193    | 15.12    | 14.66 | 15.02 | 13.92 | 13.68 | 13.99 | 13.25 |       |       |
| 0.295 | 1.22 | 2.33 | Q807B1     | RNA-cytidylyltransferase 20 synthase [NAD(P)+]-like                    | Dus2        | 5025 | 5  | 5  | 5  | 13.2 | 13.2   | 13.2  | 55.324   | 0.0004 | 5.0167 | 37404000 | 99     | 18.45    | 16.51 | 16.03 | 16.27 | 12.72 | 15.97 | 18.90 |       |       |
| 3.040 | 1.22 | 2.33 | Q8BTY2     | Sodium bicarbonate cotransporter 3                                     | Sic4a7      | 3212 | 5  | 5  | 5  | 9.4  | 9.4    | 9.4   | 116.51   | 0.0000 | 45.826 | 5712300  | 60     | 15.16    | 14.86 | 14.67 | 13.58 | 13.83 | 13.88 | 13.42 |       |       |
| 0.828 | 1.22 | 2.33 | Q8CY50     | Translucan-associated protein subunit alpha                            | Sar1        | 4784 | 3  | 3  | 3  | 17.1 | 17.1   | 17.1  | 32.065   | 0.0000 | 6.5913 | 4402400  | 47     | 15.16    | 15.55 | 14.58 | 14.05 | 15.11 | 12.36 | 14.00 |       |       |
| 1.020 | 1.21 | 2.32 | Q907A8     | Armadiol repeat-containing protein 1                                   | Armc1       | 5025 | 6  | 6  | 6  | 45   | 45     | 45    | 31.246   | 0.0000 | 13.303 | 10534000 | 92     | 16.19    | 15.66 | 16.30 | 13.48 | 15.51 | 15.52 | 14.84 |       |       |
| 2.418 | 1.21 | 2.32 | Q35538     | Cohesin subunit SA-2                                                   | Stag2       | 389  | 20 | 20 | 17 | 22.2 | 22.2   | 22.2  | 141.28   | 0.0000 | 90.742 | 16089000 | 174    | 15.15    | 15.55 | 15.36 | 14.20 | 13.52 | 14.19 | 14.42 |       |       |
| 2.154 | 1.21 | 2.32 | Q8K2M0     | 3S5 ribosomal protein L38, mitochondrial                               | Nrpl38      | 3669 | 7  | 7  | 7  | 17.9 | 17.9   | 17.9  | 45.020   | 0.0004 | 4.747  | 5963100  | 48     | 15.24    | 15.17 | 15.22 | 13.34 | 14.30 | 14.00 | 14.35 |       |       |
| 0.886 | 1.21 | 2.32 | Q9CY28     | GTP-binding protein 8                                                  | Gtpbp8      | 4781 | 3  | 3  | 3  | 17.5 | 17.5   | 17.5  | 31.872   | 0.0000 | 11.778 | 2525700  | 45     | 14.49    | 13.56 | 14.85 | 11.95 | 12.65 | 13.53 | 14.22 |       |       |
| 0.441 | 1.21 | 2.31 | Q8R105     | Vacuolar protein sorting-associated protein 37C                        | Vps37c      | 3772 | 7  | 7  | 7  | 22.4 | 22.4   | 22.4  | 38.452   | 0.0000 | 40.204 | 22621000 | 71     | 17.23    | 16.82 | 16.72 | 15.39 | 12.98 | 17.47 | 17.01 |       |       |
| 2.658 | 1.20 | 2.30 | Q8R333     | Conserved oligomeric Golgi complex subunit 6                           | Cog1        | 3848 | 6  | 6  | 6  | 7.8  | 7.8    | 7.8   | 63.039   | 0.0000 | 3.8656 | 3116700  | 15     | 14.71    | 14.63 | 14.65 | 13.59 | 13.86 | 13.35 | 13.94 |       |       |
| 1.234 | 1.20 | 2.30 | Q9Q9N1     | Arrestin domain-containing protein 1                                   | Arnc1       | 4384 | 9  | 9  | 9  | 9    | 9      | 9     | 46.329   | 0.0000 | 7.9014 | 2525500  | 14     | 15.14    | 13.75 | 14.80 | 14.21 | 13.22 | 13.11 | 13.76 |       |       |
| 0.756 | 1.20 | 2.30 | Q9D289     | Trafficking protein particle complex subunit 6B                        | Trapp6b     | 4939 | 5  | 5  | 5  | 34.8 | 34.8   | 34.8  | 17.936   | 0.0000 | 43.742 | 7520600  | 73     | 16.06    | 15.71 | 16.14 | 15.45 | 12.90 | 15.66 | 15.07 |       |       |
| 1.388 | 1.20 | 2.29 | Q9CZP5     | Mitochondrial chaperone BCS1                                           | Bcs1        | 4836 | 6  | 6  | 6  | 23.7 | 23.7   | 23.7  | 47.406   | 0.0000 | 25.817 | 3184900  | 24     | 14.33    | 13.83 | 14.22 | 12.14 | 13.85 | 12.79 | 12.94 |       |       |
| 1.322 | 1.19 | 2.28 | Q9CRD0     | Oc1a domain-containing protein 1                                       | Oc1ad1      | 4628 | 17 | 17 | 17 | 75.3 | 75.3   | 75.3  | 27.61    | 0.0000 | 32.331 | 76216000 | 289    | 18.08    | 18.30 | 18.11 | 17.24 | 17.09 | 16.93 | 16.64 |       |       |
| 1.712 | 1.18 | 2.27 | Q70251     | Elongation factor 1-beta                                               | E1f1        | 4727 | 7  | 7  | 7  | 33.3 | 33.3   | 33.3  | 24.693   | 0.0000 | 60.173 | 26781000 | 126    | 16.84    | 17.37 | 17.13 | 15.86 | 14.84 | 17.11 | 13.66 |       |       |
| 1.829 | 1.18 | 2.27 | Q9CQ54     | Solute carrier family 25 member 46                                     | Slc25a46    | 4692 | 5  | 5  | 5  | 23.7 | 23.7   | 23.7  | 46.224   | 0.0000 | 32.431 | 4345400  | 40     | 15.11    | 14.36 | 14.64 | 13.85 | 12.95 | 13.38 | 13.91 |       |       |
| 0.689 | 1.18 | 2.27 | Q8VE19     | WD repeat-containing protein mio                                       | Mios        | 3983 | 7  | 7  | 7  | 13   | 13     | 13    | 98.334   | 0.0000 | 29.589 | 7877700  | 25     | 16.19    | 15.95 | 15.94 | 16.15 | 14.25 | 15.77 | 13.20 |       |       |
| 1.005 | 1.18 | 2.27 | P27808     | Alpha-1,3-mannosyl-glycoprotein 2-beta-N-acetylglucosaminyltransferase | Mgat1       | 941  | 12 | 12 | 12 | 26.2 | 26.2   | 26.2  | 51.69    | 0.0000 | 32.399 | 9462900  | 82     | 15.16    | 15.49 | 14.88 | 14.90 | 13.20 | 14.75 | 13.15 |       |       |
| 0.918 | 1.18 | 2.27 | Q8B9E8     | Ubiquitin subunit mu-2                                                 | Ubr2        | 3817 | 4  | 4  | 4  | 14.6 | 14.6   | 14.6  | 41.916   | 0.0000 | 12.978 | 2942500  | 14     | 16.36    | 15.77 | 16.13 | 13.87 | 14.07 | 14.01 | 12.42 |       |       |
| 1.722 | 1.17 | 2.26 | Q8CQ26     | STAM-binding protein                                                   | Stamp       | 4556 | 8  | 8  | 8  | 26.7 | 26.7   | 26.7  | 48.513   | 0.0000 | 23.25  | 7620400  | 92     | 15.17    | 14.88 | 14.97 | 13.73 | 13.07 | 14.30 | 14.23 |       |       |
| 0.763 | 1.17 | 2.26 | Q8ER55     | Pleckstrin homology domain-containing family A member 2                | Plekha2     | 5318 | 8  | 8  | 8  | 24.7 | 24.7   | 24.7  | 47.379   | 0.0000 | 108.13 | 6224200  | 78     | 14.68    | 14.52 | 14.50 | 14.49 | 11.89 | 14.34 | 12.85 |       |       |
| 0.799 | 1.17 | 2.25 | Q9CZRH     | Elongation factor 1s, mitochondrial                                    | Tefm        | 4833 | 10 | 10 | 10 | 60.5 | 60.5   | 60.5  | 35.334   | 0.0000 | 166.76 | 16524000 | 135    | 16.58    | 16.42 | 16.36 | 16.18 | 15.47 | 15.92 | 13.54 |       |       |
| 1.827 | 1.17 | 2.25 | Q8CH58     | Vacuolar protein sorting-associated protein 37A                        | Vps37a      | 4837 | 5  | 5  | 5  | 10.6 | 10.6   | 10.6  | 44.871   | 0.0000 | 9.6    | 2698000  | 47     | 14.54    | 14.30 | 14.36 | 12.67 | 14.04 | 14.30 | 14.36 |       |       |
| 0.839 | 1.17 | 2.25 | Q91X21     | Uncharacterized protein KIAA2013                                       | Kiaa2013    | 4133 | 5  | 5  | 5  | 12.6 | 12.6   | 12.6  | 69.424   | 0.0000 | 23.809 | 6143700  | 45     | 15.31    | 14.03 | 15.27 | 13.18 | 14.48 | 15.14 | 12.98 |       |       |
| 1.266 | 1.17 | 2.25 | Q99KU0     | Vacuole membrane protein 1                                             | Vmp1        | 4395 | 3  | 3  | 3  | 12.6 | 12.6   | 12.6  | 45.96    | 0.0000 | 38.841 | 9302700  | 60     | 16.15    | 16.05 | 15.74 | 14.67 | 15.61 | 15.14 | 13.81 |       |       |
| 1.061 | 1.17 | 2.25 | Q8BP80     | Dmx-like protein 2                                                     | Dmx2        | 3166 | 8  | 8  | 8  | 4.6  | 4.6    | 4.6   | 338.2    | 0.0000 | 27.593 | 5781700  | 34     | 16.25    | 14.49 | 14.96 | 13.72 | 14.23 | 14.77 | 13.52 |       |       |
| 0.717 | 1.16 | 2.24 | Q6URV6     | Myosin-14                                                              | Myn14       | 2662 | 22 | 10 | 9  | 10.4 | 10.4   | 10.4  | 5.8      | 5.2    | 228.58 | 0.0000   | 8.8054 | 10632000 | 45    | 16.73 | 16.69 | 16.38 | 15.72 | 16.51 | 13.56 | 15.95 |
| 1.436 | 1.16 | 2.24 | Q9Z2D0     | Myosin-related protein 9                                               | Mtr9        | 5841 | 15 | 15 | 15 | 32.5 | 32.5   | 32.5  | 62.907   | 0.0000 | 123.9  | 9802800  | 116    | 14.46    | 14.45 | 14.46 | 14.21 | 13.22 | 13.11 | 12.74 |       |       |
| 1.438 | 1.16 | 2.23 | Q6PIP5     | NuCD domain-containing protein 1                                       | Nucd1       | 2646 | 3  | 3  | 3  | 10   | 10     | 10    | 66.704   | 0.0000 | 15.13  | 3141100  | 29     | 14.53    | 14.63 | 14.44 | 12.98 | 13.81 | 13.69 | 13.00 |       |       |
| 1.468 | 1.16 | 2.23 | Q8ERF3     | WD repeat-containing protein 61, N-term Wdr61                          | Wdr61       | 5308 | 6  | 6  | 6  | 38.7 | 38.7   | 38.7  | 33.772   | 0.0000 | 45.677 | 4149400  | 43     | 14.37    | 14.86 | 14.82 | 14.00 | 14.14 | 12.86 | 13.10 |       |       |
| 1.025 | 1.16 | 2.23 | Q8CRD6     | Solute carrier family 35 member E1                                     | Slc35e1     | 3456 | 4  | 4  | 4  | 9.5  | 9.5    | 9.5   | 44.325   | 0.0000 | 6.3997 | 3102600  | 31     | 14.91    | 14.87 | 13.13 | 12.60 | 13.35 | 12.98 | 13.66 |       |       |
| 3.152 | 1.15 | 2.23 | P71026     | Histone deacetylase 2                                                  | Hdac2       | 1542 | 16 | 9  | 9  | 32.6 | 32.6   | 32.6  | 55.302   | 0.0000 | 46.311 | 1256900  | 137    | 15.25    | 14.99 | 14.91 | 13.77 | 14.01 | 14.16 | 13.66 |       |       |
| 1.081 | 1.15 | 2.22 | Q8BPM0     | Dishevelled-associated activator of morphogenesis 1                    | Dam1        | 3165 | 13 | 12 | 12 | 16.9 | 16.9   | 16.9  | 123.37   | 0.0000 | 28.818 | 8294300  | 77     | 14.05    | 13.92 | 14.08 | 11.97 | 13.50 | 13.75 | 12.21 |       |       |
| 1.179 | 1.15 | 2.22 | Q6PFR5     | Transformer-2 protein homolog alpha                                    | Tra2a       | 2629 | 6  | 5  | 5  | 22.1 | 18.5   | 18.5  | 32.316   | 0.0000 | 15.823 | 12407000 | 59     | 16.02    | 16.76 | 16.69 | 16.38 | 15.00 | 14.60 | 15.37 |       |       |
| 1.002 | 1.15 | 2.22 | Q9Z0W3     | Nuclear pore complex protein Nup160                                    | Nup160      | 5711 | 18 | 18 | 18 | 21.7 | 21.7   | 21.7  | 158.23   | 0.0000 | 142.23 | 15316000 | 152    | 16.27    | 15.62 | 15.18 | 14.39 | 15.73 | 13.71 | 14    |       |       |

|        |      |             |                                                                              |          |       |    |    |      |        |      |        |        |         |          |          |       |       |       |       |       |       |       |       |
|--------|------|-------------|------------------------------------------------------------------------------|----------|-------|----|----|------|--------|------|--------|--------|---------|----------|----------|-------|-------|-------|-------|-------|-------|-------|-------|
| 2.183  | 1.07 | 2.11 Q8C7U7 | Polypeptide N-acetylglucosaminyltransferase 6                                | Galnt6   | 3415  | 3  | 3  | 3    | 8.8    | 8.8  | 8.8    | 71.536 | 0.0000  | 10.836   | 1840900  | 27    | 14.12 | 13.97 | 14.26 | 12.82 | 13.27 | 12.65 | 13.47 |
| 1.305  | 1.07 | 2.10 Q9D4F8 | Gamma-tubulin complex component 4                                            | Tubgcp4  | 4975  | 5  | 5  | 5    | 12.3   | 12.3 | 12.3   | 76.125 | 0.0000  | 10.517   | 2802200  | 21    | 13.83 | 13.47 | 14.13 | 12.63 | 12.76 | 13.57 | 11.99 |
| 1.621  | 1.07 | 2.10 Q9CQJ4 | E3 ubiquitin-protein ligase RING2                                            | Rnf2     | 4605  | 4  | 4  | 3    | 17     | 17   | 12.8   | 37.623 | 0.0000  | 13.064   | 4194400  | 41    | 14.44 | 14.82 | 14.53 | 14.28 | 13.05 | 13.24 | 13.54 |
| 1.994  | 1.07 | 2.10 Q9KLQ2 | Triple functional domain protein                                             | Trio     | 1778  | 7  | 7  | 7    | 3.8    | 3.8  | 3.8    | 347.96 | 0.0000  | 58.286   | 3848900  | 34    | 13.82 | 13.70 | 15.23 | 12.45 | 13.41 | 13.86 | 13.02 |
| 0.975  | 1.06 | 2.09 P53702 | Hydroxymethyl-CoA lyase                                                      | Hcoa     | 12308 | 5  | 5  | 5    | 26.8   | 26.8 | 26.8   | 30.977 | 0.0000  | 20.695   | 3948330  | 47    | 14.08 | 14.02 | 14.68 | 14.07 | 13.95 | 14.02 | 12.92 |
| 0.1272 | 1.06 | 2.09 Q9S117 | Tartrate-resistant acid phosphatase type 5                                   | Acp5     | 1775  | 3  | 3  | 3    | 15.6   | 15.6 | 15.6   | 36.807 | 0.0000  | 41.956   | 6107700  | 36    | 15.18 | 15.30 | 15.75 | 14.46 | 14.48 | 15.08 | 13.48 |
| 0.837  | 1.06 | 2.09 Q8CIM3 | D-2-hydroxyglutarate dehydrogenase, mitochondrial                            | D2hgdh   | 3558  | 5  | 5  | 5    | 15.7   | 15.7 | 15.7   | 58.575 | 0.0000  | 10.516   | 2763600  | 19    | 14.77 | 14.69 | 14.91 | 13.99 | 14.20 | 12.20 | 14.51 |
| 2.560  | 1.06 | 2.09 Q92186 | Translocin-associated protein subunit delta                                  | Sar4     | 2364  | 9  | 9  | 9    | 45.3   | 45.3 | 45.3   | 18.936 | 0.0000  | 12.04    | 92116000 | 341   | 17.61 | 17.79 | 17.95 | 16.40 | 16.97 | 16.54 | 16.97 |
| 0.420  | 1.06 | 2.09 Q9D020 | Cytosolic 5-nucleotidase 3A                                                  | N5c3a    | 4849  | 9  | 9  | 9    | 46     | 46   | 46     | 37.252 | 0.0000  | 110.7    | 21835000 | 121   | 16.60 | 17.35 | 17.55 | 16.41 | 13.50 | 10.71 | 16.80 |
| 1.114  | 1.06 | 2.08 Q9JUN2 | Aminacylase-1                                                                | Acy1     | 4351  | 5  | 5  | 5    | 22.3   | 22.3 | 22.3   | 46.78  | 0.0000  | 38.191   | 1094000  | 23    | 14.74 | 14.09 | 15.01 | 14.21 | 13.08 | 14.10 | 14.10 |
| 2.103  | 1.06 | 2.08 Q9VB70 | Thioredoxin-related transmembrane protein 1                                  | Tmx1     | 3894  | 9  | 9  | 9    | 24.8   | 24.8 | 24.8   | 31.395 | 0.0000  | 35.203   | 39566000 | 251   | 16.91 | 16.60 | 16.80 | 15.99 | 15.14 | 15.74 | 15.97 |
| 0.963  | 1.06 | 2.08 Q9ES28 | General transcription factor II-I                                            | Gtf2i    | 5352  | 13 | 13 | 12   | 15.8   | 15.8 | 13.9   | 112.26 | 0.0000  | 17.648   | 7832500  | 84    | 14.39 | 14.50 | 14.57 | 13.64 | 14.18 | 13.79 | 12.10 |
| 1.623  | 1.06 | 2.08 Q9BH79 | Anoctamin-10                                                                 | Ano10    | 3021  | 5  | 5  | 5    | 8.3    | 8.3  | 8.3    | 76.187 | 0.0000  | 48.905   | 7623200  | 42    | 14.66 | 14.28 | 14.56 | 13.92 | 12.72 | 13.76 | 13.36 |
| 0.398  | 1.06 | 2.08 Q9Z9Z2 | E3 ubiquitin-protein ligase HECTD1                                           | Hectd1   | 2490  | 18 | 18 | 9    | 9.9    | 9.9  | 9.9    | 290.08 | 0.0000  | 41.257   | 25651000 | 78    | 16.65 | 17.07 | 17.57 | 15.95 | 13.63 | 17.45 | 17.57 |
| 0.965  | 1.06 | 2.08 Q9VEH8 | Endoplasmic reticulum lectin 1                                               | Erlc1    | 4006  | 3  | 3  | 3    | 6.4    | 6.4  | 6.4    | 54.906 | 0.0011  | 3.634    | 3276200  | 31    | 14.46 | 14.35 | 14.30 | 13.30 | 12.14 | 13.44 | 14.37 |
| 0.837  | 1.05 | 2.07 Q08585 | Clathrin light chain A                                                       | Cltla    | 277   | 5  | 5  | 5    | 20.4   | 20.4 | 20.4   | 25.604 | 0.0000  | 18.104   | 3588300  | 43    | 14.32 | 15.12 | 14.10 | 13.58 | 12.22 | 14.49 | 13.56 |
| 0.712  | 1.05 | 2.07 Q9JL56 | Glycerophosphodiester phosphodiesterase 1                                    | Gde1     | 5472  | 5  | 5  | 5    | 17.5   | 17.5 | 17.5   | 37.629 | 0.0000  | 9.6362   | 4862000  | 38    | 14.86 | 15.08 | 14.78 | 13.57 | 12.32 | 14.62 | 14.92 |
| 0.697  | 1.04 | 2.06 Q9RLG2 | Transporin-2                                                                 | Tpox2    | 4427  | 11 | 4  | 4    | 17     | 8.1  | 10.46  | 0.0000 | 62.723  | 4910000  | 89       | 14.69 | 14.28 | 14.68 | 13.35 | 14.23 | 14.39 | 11.99 |       |
| 3.195  | 1.04 | 2.06 Q88428 | Bifunctional 3-phosphoadenosine 5-phosphosulfate synthase 2:Sulfate adPases2 | AdPases2 | 528   | 20 | 20 | 19   | 44.1   | 44.1 | 41.9   | 70.35  | 0.0000  | 96.804   | 21169000 | 217   | 15.86 | 15.42 | 15.98 | 14.57 | 14.42 | 14.77 | 14.55 |
| 1.294  | 1.04 | 2.05 Q3UDF0 |                                                                              | Sic2a6   | 1947  | 11 | 11 | 10   | 17.9   | 17.1 | 54.433 | 0.0000 | 151.23  | 19161000 | 129      | 15.23 | 15.05 | 15.23 | 13.87 | 15.11 | 14.02 | 13.54 |       |
| 1.534  | 1.04 | 2.05 Q3TR13 | Syembryn-A                                                                   | Ric8a    | 1849  | 12 | 12 | 11   | 29.6   | 29.6 | 27     | 59.846 | 0.0000  | 69.271   | 12337000 | 74    | 15.69 | 15.53 | 15.76 | 14.35 | 15.25 | 14.92 | 13.98 |
| 0.646  | 1.04 | 2.05 Q8VJ75 | Importin-4                                                                   | Ipo4     | 4030  | 16 | 16 | 15   | 19.3   | 19.3 | 19.3   | 119.27 | 0.0000  | 125.99   | 25319000 | 232   | 16.70 | 15.80 | 16.36 | 15.80 | 14.41 | 15.84 | 15.97 |
| 1.196  | 1.04 | 2.05 Q8CFE6 | Sodium-coupled neutral amino acid transporter 2                              | Sic2a2   | 3485  | 4  | 4  | 4    | 12.5   | 12.5 | 12.5   | 55.003 | 0.0000  | 167.34   | 3159100  | 65    | 14.72 | 14.10 | 14.27 | 13.84 | 13.73 | 12.33 | 13.41 |
| 1.630  | 1.03 | 2.05 Q9D5V6 | Synapse-associated protein 1                                                 | Syp1     | 4987  | 4  | 4  | 4    | 13.7   | 13.7 | 14.1   | 41.349 | 0.0000  | 80.933   | 3073100  | 56    | 13.15 | 14.11 | 14.00 | 13.14 | 12.72 | 12.67 | 12.33 |
| 1.060  | 1.03 | 2.05 Q8BJM7 | S-adenosyl-L-methionine-dependent tRNA 4-demethyllysine synthase             | Tys1     | 3082  | 5  | 5  | 5    | 8.2    | 8.2  | 8.2    | 81.598 | 0.0000  | 6.719    | 2172600  | 23    | 13.99 | 13.94 | 14.12 | 12.28 | 14.16 | 12.84 | 12.65 |
| 1.037  | 1.03 | 2.05 Q9C5A2 | Ribose-phosphate pyrophosphokinase 2                                         | Ppy2     | 4697  | 15 | 7  | 52.8 | 46.97  | 29.2 | 34.789 | 0.0000 | 7.264   | 13058900 | 157      | 15.21 | 15.21 | 15.21 | 13.93 | 13.08 | 14.75 | 14.86 |       |
| 0.985  | 1.03 | 2.04 Q9EJL5 | Protein SET                                                                  | Set      | 5289  | 8  | 8  | 8    | 29.1   | 29.1 | 33.377 | 0.0000 | 91.015  | 12395000 | 165      | 15.56 | 16.09 | 15.02 | 15.10 | 15.56 | 15.09 | 15.59 |       |
| 0.436  | 1.03 | 2.04 Q9JHF7 | Hematopoietic prostaglandin D synthase                                       | Hpgds    | 5358  | 9  | 9  | 9    | 56.8   | 56.8 | 56.8   | 23.227 | 0.0000  | 105.35   | 39718000 | 178   | 17.74 | 17.34 | 17.58 | 17.45 | 13.90 | 17.32 | 17.41 |
| 0.712  | 1.03 | 2.04 Q35654 | DNA polymerase delta subunit 2                                               | Pold2    | 393   | 10 | 10 | 10   | 30.9   | 30.9 | 30.9   | 51.354 | 0.0000  | 44.819   | 7882500  | 95    | 15.01 | 15.09 | 15.18 | 15.52 | 13.65 | 14.30 | 12.78 |
| 0.547  | 1.02 | 2.03 Q9DB80 | Prostamide/prostaglandin F synthase                                          | Fam13b   | 5129  | 5  | 5  | 5    | 26.9   | 26.9 | 26.9   | 21.67  | 0.0000  | 14.688   | 13875000 | 111   | 15.49 | 15.27 | 14.58 | 12.66 | 13.16 | 15.45 | 15.09 |
| 1.461  | 1.02 | 2.03 P58137 | Acyl-coenzyme A thioesterase 8                                               | Acof8    | 1303  | 10 | 10 | 10   | 42.2   | 42.2 | 42.2   | 35.827 | 0.0000  | 84.919   | 10955000 | 67    | 14.56 | 14.37 | 14.58 | 14.37 | 13.44 | 14.58 | 14.72 |
| 2.007  | 1.02 | 2.03 Q64373 | Bcl-2-like protein 1                                                         | Bcl2l1   | 2437  | 3  | 3  | 3    | 13.7   | 13.7 | 13.7   | 26.132 | 0.0004  | 8.422    | 4766600  | 46    | 14.85 | 14.14 | 14.65 | 13.57 | 13.42 | 13.91 | 13.19 |
| 2.409  | 1.02 | 2.03 Q3URF8 | BTB/POZ domain-containing protein KCTD21                                     | Kctd21   | 2023  | 4  | 4  | 4    | 30.4   | 30.4 | 30.4   | 29.623 | 0.0000  | 22.407   | 4350700  | 57    | 14.21 | 13.58 | 13.49 | 12.80 | 12.85 | 12.60 | 12.70 |
| 0.603  | 1.02 | 2.03 P21460 | Cystatin-C                                                                   | Cst3     | 865   | 3  | 3  | 3    | 26.4   | 26.4 | 26.4   | 15.531 | 0.0000  | 32.809   | 6307500  | 73    | 14.84 | 15.07 | 15.13 | 15.07 | 12.15 | 13.95 | 14.79 |
| 0.990  | 1.02 | 2.03 Q8K157 | Calnexin 1, leucinease                                                       | Calm1    | 3613  | 36 | 36 | 36   | 37.798 | 36.3 | 36.3   | 37.798 | 0.0000  | 49.155   | 14780000 | 147   | 15.93 | 15.93 | 15.93 | 14.77 | 12.97 | 14.65 | 12.73 |
| 0.857  | 1.02 | 2.02 Q9D1H7 | Golgi to ER traffic protein 4 homolog                                        | Ge4      | 4915  | 5  | 5  | 5    | 16.8   | 16.8 | 16.8   | 36.525 | 0.0000  | 42.367   | 5339200  | 50    | 16.02 | 15.47 | 15.56 | 15.11 | 13.26 | 15.31 | 14.99 |
| 0.646  | 1.01 | 2.02 Q912W2 | GDP-fucose protein O-fucosyltransferase 1                                    | Pofut1   | 4203  | 8  | 8  | 8    | 30     | 30   | 30     | 44.688 | 0.0000  | 110.69   | 11775000 | 85    | 15.22 | 14.95 | 14.81 | 14.35 | 15.08 | 12.22 | 14.27 |
| 0.730  | 1.01 | 2.02 Q8R313 | Exocyst complex component 6                                                  | Exoc6    | 3829  | 9  | 8  | 8    | 15.2   | 14.1 | 14.1   | 93.076 | 0.0000  | 32.597   | 9201400  | 82    | 15.53 | 15.02 | 15.41 | 14.72 | 12.67 | 14.86 | 14.98 |
| 1.256  | 1.01 | 2.01 Q9NVL3 | Ube2A carrier family 12 member 7                                             | Uba7     | 5766  | 10 | 10 | 10   | 12.4   | 12.4 | 91.93  | 0.0000 | 72.0700 | 97000    | 108      | 14.13 | 14.07 | 14.93 | 14.07 | 14.07 | 14.07 | 14.07 |       |
| 0.606  | 1.01 | 2.01 Q70131 | Ninjurin-1                                                                   | Ninj1    | 469   | 2  | 2  | 1    | 1      | 1    | 13.2   | 16.555 | 0.0000  | 98.18    | 8916400  | 84    | 16.67 | 16.75 | 16.40 | 14.05 | 16.92 | 15.05 | 16.96 |
| 1.071  | 1.01 | 2.01 P18181 | CD48 antigen                                                                 | Cd48     | 835   | 8  | 8  | 8    | 33.8   | 33.8 | 33.8   | 27.383 | 0.0000  | 35.306   | 25680000 | 108   | 16.11 | 15.84 | 15.84 | 15.30 | 13.74 | 15.27 | 15.37 |
| 0.748  | 1.01 | 2.01 Q8K385 | Ferric-chelate reductase 1                                                   | FRRS1    | 3695  | 3  | 3  | 3    | 6.4    | 6.4  | 6.4    | 66.047 | 0.0000  | 7.675    | 4982800  | 56    | 15.52 | 15.39 | 15.26 | 15.24 | 12.97 | 15.23 | 14.09 |
| 1.340  | 1.01 | 2.01 Q8C708 | Transmembrane protein C10orf54 homolog                                       | Uchl1    | 3407  | 3  | 3  | 3    | 11.1   | 11.1 | 11.1   | 24.532 | 0.0000  | 8.2037   | 2484400  | 46    | 14.25 | 13.75 | 14.07 | 12.53 | 12.92 | 13.90 | 12.71 |
| 0.467  | 1.01 | 2.01 Q8R0P9 | Ubiquitin carboxyl-terminal hydrolase isozyme L1                             | UchL1b   | 5637  | 8  | 8  | 8    | 36.8   | 36.8 | 36.8   | 24.836 | 0.0000  | 29.336   | 7707500  | 58    | 15.34 | 15.95 | 16.14 | 15.10 | 15.90 | 15.12 | 14.36 |
| 1.623  | 1.01 | 2.01 Q9B5V1 | Sodium- and chloride-dependent creatine transporter 1                        | Sic2a8   | 3989  | 3  | 3  | 3    | 5.9    | 5.9  | 5.9    | 70.999 | 0.0000  | 11.376   | 1433500  | 22    | 14.88 | 14.19 | 14.00 | 12.18 | 15.00 | 13.42 | 12.80 |
| 0.875  | 1.00 | 2.01 Q08800 | Serin B8                                                                     | Serpinb8 | 3001  | 14 | 14 | 14   | 53.7   | 53.7 | 53.7   | 42.15  | 0.0000  | 248.82   | 55383000 | 238   | 17.28 | 17.08 | 17.31 | 16.90 | 16.68 | 16.48 | 14.83 |
| 0.473  | 1.00 | 2.01 Q8R5G7 | Arf-GAP with Rho-GAP domain, ANK repeat and PH domain-containing prArp3      | Arp3     | 3888  | 14 | 14 | 14   | 14.8   | 14.8 | 14.8   | 169.74 | 0.0000  | 56.343   | 9226600  | 69    | 15.55 | 15.45 | 15.91 | 16.29 | 15.32 | 14.34 | 12.57 |
| 0.707  | 1.00 | 2.00 P24789 | Cyclin-dependent kinase 11B                                                  | Cdk11b   | 1302  | 12 | 12 | 12   | 14.5   | 14.5 | 14.5   | 91.512 | 0.0000  | 18.195   | 7653300  | 63    | 14.65 | 14.95 | 14.88 | 14.72 | 12.97 | 14.65 | 12.73 |
| 1.360  | 1.00 | 2.00 Q8KBC8 | Phosphatidylinositol 4-kinase beta                                           | Pik4b    | 3099  | 4  | 4  | 4    | 6.9    | 6.9  | 6.9    | 91.514 | 0.0000  | 11.859   | 4100500  | 22    | 14.53 | 14.28 | 14.76 | 14.08 | 13.71 | 13.64 | 12.68 |
| 1.190  | 1.00 | 1.99 Q9D404 | 3-oxoacyl-[acyl-carrier-protein] synthase, mitochondrial                     | Oxsm     | 4971  | 5  | 5  | 5    | 21.4   | 21.4 | 21.4   | 48.627 | 0.0000  | 52.531   | 3925400  | 68    | 14.92 | 14.97 | 15.01 | 13.94 | 12.98 | 14.44 | 14.53 |
| 0.377  | 0.99 | 1.99 Q9D8R1 | Uncharacterized protein C17orf78 homolog                                     | Gm11437  | 2125  | 2  | 2  | 2    | 8.3    | 8.3  | 8.3    | 32.583 | 0.0024  | 2.977    | 75620000 | 33    | 16.94 | 18.49 | 18.19 | 17.08 | 14.46 | 17.24 | 18.76 |
| 0.912  | 0.99 | 1.99 Q9D6L8 | Peptidyl-prolyl cis-trans isomerase-like 3                                   | Ppi3     | 5002  | 2  | 2  | 2    | 20.5   | 20.5 | 20.5   | 18.127 | 0.0000  | 34.29    | 10944000 | 29    | 14.29 | 14.68 | 14.81 | 14.73 | 13.03 | 12.77 | 13.98 |
| 1.634  | 0.99 | 1.98 Q9DBR1 | Protein phosphatase 1 regulatory subunit 12A                                 | Ppp1r12a | 5172  | 30 | 28 | 34.2 | 34.2   | 34.2 | 11     |        |         |          |          |       |       |       |       |       |       |       |       |

|       |      |             |                                                                               |          |      |     |     |     |        |        |        |         |        |        |           |     |       |       |       |       |       |       |       |
|-------|------|-------------|-------------------------------------------------------------------------------|----------|------|-----|-----|-----|--------|--------|--------|---------|--------|--------|-----------|-----|-------|-------|-------|-------|-------|-------|-------|
| 0.730 | 0.93 | 1.90 E9Q784 | Histone-lysine N-methyltransferase                                            | Zc3h13   | 245  | 8   | 8   | 8   | 6.2    | 6.2    | 6.2    | 20375   | 0.0000 | 16.216 | 3851700   | 46  | 14.30 | 14.65 | 14.85 | 15.19 | 13.18 | 13.43 | 13.01 |
| 0.732 | 0.93 | 1.90 E9PYH6 | WD repeat-containing protein 41                                               | Seld1a   | 223  | 8   | 8   | 8   | 7      | 7      | 7      | 186.06  | 0.0000 | 13.41  | 3970900   | 40  | 14.99 | 15.08 | 15.22 | 12.81 | 14.54 | 14.10 | 15.22 |
| 1.300 | 0.93 | 1.90 Q3UDP0 | Calpain-5                                                                     | Wdr41    | 1949 | 12  | 12  | 12  | 38.3   | 38.3   | 38.3   | 51.51   | 0.0000 | 38.701 | 12123000  | 112 | 15.37 | 15.54 | 15.43 | 14.59 | 13.66 | 15.06 | 14.78 |
| 0.680 | 0.93 | 1.90 Q0R888 | Man2b1                                                                        | Ckapn5   | 285  | 14  | 14  | 14  | 25.6   | 25.6   | 25.6   | 72.954  | 0.0000 | 32.828 | 12926000  | 150 | 14.89 | 14.71 | 15.02 | 12.17 | 14.78 | 14.35 | 14.49 |
| 2.085 | 0.92 | 1.89 P27046 | NFAT activation molecule 1                                                    | Nfatm1   | 385  | 36  | 36  | 36  | 37.5   | 37.5   | 37.5   | 131.63  | 0.0000 | 31.543 | 57148000  | 561 | 16.31 | 15.41 | 15.02 | 15.15 | 15.02 | 15.71 | 15.53 |
| 0.840 | 0.92 | 1.89 Q8R4V1 | NIF3-like protein 1                                                           | Nif3l1   | 2874 | 6   | 6   | 6   | 25.4   | 25.4   | 25.4   | 29.887  | 0.0000 | 30.166 | 14343000  | 106 | 15.76 | 14.95 | 15.55 | 14.36 | 13.93 | 15.71 | 14.01 |
| 0.947 | 0.92 | 1.89 Q9EQ80 | Choline/ethanolamine kinase                                                   | Chkb     | 5273 | 6   | 6   | 6   | 23.9   | 23.9   | 23.9   | 41.745  | 0.0000 | 33.682 | 10578000  | 127 | 15.59 | 15.32 | 15.55 | 14.84 | 13.40 | 15.20 | 14.84 |
| 1.556 | 0.92 | 1.89 Q55229 | Ras-related GTP-binding protein A                                             | Rraga    | 465  | 12  | 12  | 12  | 44.4   | 44.4   | 44.4   | 45.126  | 0.0000 | 96.94  | 14755000  | 157 | 15.20 | 14.98 | 15.45 | 13.87 | 14.84 | 14.52 | 13.93 |
| 1.096 | 0.92 | 1.89 Q6X035 | Thioredoxin domain-containing protein 12                                      | Txdn12   | 2877 | 15  | 15  | 6   | 52.4   | 52.4   | 52.4   | 23      | 0.0000 | 11.778 | 26790000  | 250 | 16.48 | 16.34 | 16.34 | 15.75 | 14.51 | 15.47 | 16.17 |
| 0.761 | 0.92 | 1.89 Q9CQJ0 | Cathein-related antimicrobial peptide                                         | Camp     | 4634 | 3   | 3   | 3   | 29.4   | 29.4   | 29.4   | 19.048  | 0.0000 | 3.9211 | 1370100   | 19  | 13.98 | 14.18 | 13.77 | 13.68 | 12.99 | 13.77 | 11.95 |
| 0.470 | 0.91 | 1.88 P51437 | Spatacsin                                                                     | Spg11    | 1196 | 3   | 3   | 3   | 21.5   | 21.5   | 21.5   | 19.453  | 0.0000 | 104.66 | 9438700   | 66  | 15.72 | 14.99 | 15.73 | 13.05 | 13.65 | 15.81 | 15.74 |
| 1.321 | 0.91 | 1.88 Q3UH43 | H-2 class II histocompatibility antigen gamma chain                           | Cd74     | 1968 | 12  | 12  | 12  | 7.4    | 7.4    | 7.4    | 273.93  | 0.0000 | 89.172 | 26211000  | 85  | 16.88 | 16.43 | 16.67 | 15.70 | 15.02 | 16.38 | 15.87 |
| 2.083 | 0.91 | 1.88 PQ4441 | Phosphatidate cytidyltransferase 2                                            | Cd2p     | 1642 | 13  | 13  | 13  | 42.7   | 42.7   | 42.7   | 31.557  | 0.0000 | 173.89 | 78060000  | 229 | 18.73 | 18.49 | 18.56 | 17.27 | 17.80 | 18.10 | 17.56 |
| 0.894 | 0.91 | 1.88 Q9QL43 | Thioredoxin domain-containing protein 17                                      | Txdn17   | 4407 | 3   | 3   | 3   | 11.7   | 11.7   | 11.7   | 51.313  | 0.0000 | 30.457 | 9114000   | 91  | 15.98 | 16.08 | 14.75 | 13.80 | 15.41 | 15.22 |       |
| 1.073 | 0.91 | 1.88 Q9CQM5 | SET and MYND domain-containing protein 5                                      | Smyd5    | 4612 | 4   | 4   | 4   | 28.5   | 28.5   | 28.5   | 14.015  | 0.0000 | 46.096 | 4606500   | 62  | 14.46 | 15.69 | 15.28 | 13.74 | 14.35 | 13.96 | 14.89 |
| 0.791 | 0.91 | 1.88 Q3TYX3 | Nuclear factor of activated T-cells, cytoplasmic 2                            | Nfatc2   | 1890 | 5   | 5   | 5   | 13.2   | 13.2   | 13.2   | 47.095  | 0.0000 | 8.4097 | 5278000   | 68  | 15.02 | 14.85 | 14.61 | 14.84 | 13.33 | 12.95 | 14.56 |
| 0.707 | 0.91 | 1.88 Q9Q591 | Proteasome assembly chaperone 2                                               | Psmg2    | 2180 | 9   | 9   | 9   | 18.2   | 18.2   | 18.2   | 100.02  | 0.0000 | 60.001 | 11253000  | 96  | 15.11 | 15.06 | 15.61 | 14.32 | 15.12 | 15.02 | 12.95 |
| 0.558 | 0.91 | 1.88 Q9EST4 | Collet-coil domain-containing protein 6                                       | Cctc6    | 5344 | 5   | 5   | 5   | 18.9   | 18.9   | 18.9   | 29.524  | 0.0002 | 5.8302 | 4613100   | 44  | 14.57 | 14.64 | 15.03 | 13.95 | 12.45 | 15.44 | 13.51 |
| 0.644 | 0.90 | 1.87 D3Y2P9 | 28S ribosomal protein S29, mitochondrial                                      | Dap3     | 2189 | 11  | 11  | 11  | 33.5   | 33.5   | 33.5   | 44.699  | 0.0000 | 80.966 | 12295000  | 118 | 15.39 | 14.69 | 15.06 | 15.39 | 13.54 | 15.04 | 12.59 |
| 0.516 | 0.90 | 1.87 Q9ER88 | Caspase recruitment domain-containing protein 9                               | Card9    | 5300 | 12  | 12  | 12  | 32.6   | 32.6   | 32.6   | 62.461  | 0.0000 | 77.716 | 19510000  | 144 | 16.12 | 15.90 | 16.07 | 16.21 | 11.67 | 16.24 | 16.38 |
| 0.269 | 0.90 | 1.87 A2AIV8 | BIRC2 and CDKN1A-interacting protein                                          | Bircp    | 26   | 6   | 6   | 6   | 33.5   | 33.5   | 33.5   | 35.942  | 0.0000 | 33.651 | 5238700   | 54  | 15.25 | 14.44 | 14.61 | 13.30 | 13.18 | 14.90 | 14.06 |
| 0.887 | 0.90 | 1.87 Q9CQJ0 | Caseinolytic peptidase B protein homolog                                      | Ctpb     | 4716 | 6   | 6   | 6   | 33.5   | 33.5   | 33.5   | 117.94  | 0.0000 | 4.2979 | 2395500   | 18  | 14.01 | 13.86 | 14.22 | 13.82 | 12.52 | 12.81 | 13.35 |
| 1.297 | 0.90 | 1.87 Q9D824 | Pre-mRNA 3-end-processing factor FIP1                                         | Fip11    | 2189 | 7   | 7   | 7   | 14.6   | 14.6   | 14.6   | 76.003  | 0.0006 | 4.2979 | 2395500   | 18  | 14.01 | 13.86 | 14.22 | 13.82 | 12.52 | 12.81 | 13.35 |
| 1.226 | 0.90 | 1.87 Q9D824 | Aladin                                                                        | Aaas     | 5048 | 13  | 13  | 13  | 29.6   | 29.6   | 29.6   | 64.958  | 0.0000 | 86.179 | 9022700   | 69  | 15.12 | 16.39 | 15.55 | 14.80 | 15.24 | 14.69 | 14.41 |
| 1.019 | 0.90 | 1.87 P58742 | Putative decarboxylase TADN1                                                  | Tadn1    | 1321 | 4   | 4   | 4   | 10.1   | 10.1   | 10.1   | 59.43   | 0.0000 | 39.849 | 4531200   | 66  | 15.02 | 14.93 | 14.90 | 14.99 | 13.27 | 14.23 | 14.71 |
| 1.709 | 0.90 | 1.87 Q9PRM1 | Phospholipase B-like 1: Phospholipase B-like 1 chain A:Phospholipase B-IFBd1  | Pfbd1    | 1321 | 5   | 5   | 5   | 19.7   | 19.7   | 19.7   | 33.955  | 0.0000 | 7.5288 | 4054400   | 35  | 14.34 | 15.18 | 13.79 | 13.79 | 13.84 | 14.23 | 13.71 |
| 1.802 | 0.90 | 1.86 Q9VC10 | Phospholipase B-like 1: Phospholipase B-like 1 chain A:Phospholipase B-IFBd1  | Pfbd1    | 1321 | 5   | 5   | 5   | 19.7   | 19.7   | 19.7   | 33.955  | 0.0000 | 7.5288 | 4054400   | 35  | 14.34 | 15.18 | 13.79 | 13.79 | 13.84 | 14.23 | 13.71 |
| 2.065 | 0.89 | 1.86 Q9DCT2 | NADH dehydrogenase [ubiquinone] iron-sulfur protein 3, mitochondrial          | Ndufs4   | 364  | 18  | 18  | 18  | 38.4   | 38.4   | 38.4   | 62.998  | 0.0000 | 251.87 | 78900000  | 465 | 16.72 | 17.13 | 16.88 | 17.37 | 16.88 | 17.37 | 16.88 |
| 0.699 | 0.89 | 1.86 Q91ZR2 | Sorting nexin-18                                                              | Snx18    | 5230 | 12  | 12  | 12  | 38.8   | 38.8   | 38.8   | 30.149  | 0.0000 | 40.965 | 30188000  | 147 | 17.15 | 17.15 | 17.19 | 16.21 | 15.96 | 16.79 | 16.11 |
| 1.370 | 0.89 | 1.86 Q9WV76 | AP-4 complex subunit beta-1                                                   | Ap4b1    | 4199 | 8   | 8   | 8   | 16.6   | 16.6   | 16.6   | 67.903  | 0.0000 | 47.139 | 7333100   | 47  | 14.91 | 13.92 | 14.72 | 14.93 | 13.54 | 12.75 | 13.28 |
| 1.642 | 0.89 | 1.86 Q3LHC7 | AP-4 complex subunit beta-1                                                   | Ap4b1    | 4199 | 8   | 8   | 8   | 16.6   | 16.6   | 16.6   | 67.903  | 0.0000 | 47.139 | 7333100   | 47  | 14.91 | 13.92 | 14.72 | 14.93 | 13.54 | 12.75 | 13.28 |
| 1.326 | 0.89 | 1.85 Q61206 | Platelet-activating factor acetylcholinesterase IB subunit beta               | Pafah1b2 | 5276 | 4   | 4   | 4   | 8.1    | 8.1    | 8.1    | 82.975  | 0.0051 | 2.913  | 2462400   | 14  | 13.82 | 13.76 | 14.20 | 13.27 | 12.58 | 12.62 | 13.66 |
| 0.762 | 0.89 | 1.85 Q9D617 | Protein FAM69A                                                                | Fam69a   | 1972 | 3.6 | 3.6 | 3.6 | 34.6   | 34.6   | 34.6   | 131.72  | 0.0086 | 30.457 | 3872800   | 91  | 15.98 | 16.08 | 14.75 | 13.80 | 15.41 | 15.22 |       |
| 0.514 | 0.89 | 1.85 Q9CR89 | Endoplasmic reticulum-Golgi intermediate compartment protein 2                | Ergic2   | 4994 | 3   | 3   | 3   | 9.6    | 9.6    | 9.6    | 48.936  | 0.0000 | 18.718 | 4125100   | 38  | 13.99 | 13.91 | 14.17 | 13.59 | 12.28 | 12.80 | 14.40 |
| 1.225 | 0.89 | 1.85 Q9C822 | Kinesin and ankyrin repeat domain-containing protein 2                        | Kank2    | 4682 | 3   | 3   | 3   | 13.3   | 13.3   | 13.3   | 42.481  | 0.0000 | 16.663 | 2954500   | 57  | 13.94 | 14.35 | 14.28 | 15.19 | 12.83 | 13.00 | 12.19 |
| 0.282 | 0.88 | 1.85 Q148V7 | LisH domain and HEAT repeat-containing protein KIAA1468                       | Kiaa1468 | 3274 | 9.6 | 9.6 | 9.6 | 90.244 | 90.244 | 90.244 | 9.6     | 0.0000 | 30.307 | 3629500   | 37  | 14.50 | 13.62 | 14.44 | 13.15 | 13.44 | 14.61 | 14.46 |
| 0.979 | 0.88 | 1.84 Q88587 | Catechol O-methyltransferase                                                  | Comt     | 1785 | 9   | 9   | 9   | 11.3   | 11.3   | 11.3   | 134.50  | 0.0000 | 10.641 | 18938000  | 30  | 17.50 | 18.12 | 16.36 | 17.96 | 13.50 | 16.60 | 17.72 |
| 1.325 | 0.88 | 1.84 Q9R086 | RNA-binding protein 3                                                         | Rbm3     | 548  | 13  | 13  | 13  | 52.1   | 52.1   | 52.1   | 29.486  | 0.0000 | 216.16 | 55193000  | 347 | 17.63 | 17.61 | 17.26 | 15.55 | 17.24 | 16.83 | 16.84 |
| 0.519 | 0.88 | 1.84 Q7TP00 | Phosphatidylinositol 4-phosphate 3-kinase C2 domain-containing subunit 3      | Pip4qc2  | 601  | 7   | 7   | 7   | 51     | 51     | 51     | 16.604  | 0.0000 | 31.33  | 15096000  | 102 | 16.21 | 16.76 | 16.88 | 16.37 | 15.64 | 15.19 | 15.75 |
| 2.645 | 0.88 | 1.83 Q91XU3 | Phosphatidylinositol 5-phosphate 4-kinase type-2 gamma                        | Pip4kc2  | 2763 | 12  | 12  | 12  | 67.7   | 67.7   | 67.7   | 47.335  | 0.0000 | 133.29 | 5275000   | 302 | 16.25 | 15.93 | 16.37 | 15.33 | 15.47 | 16.36 | 15.05 |
| 2.706 | 0.87 | 1.83 P00405 | Cytochrome c oxidase subunit 2                                                | Mtco2    | 4149 | 23  | 23  | 23  | 67.7   | 67.7   | 67.7   | 47.335  | 0.0000 | 133.29 | 5275000   | 302 | 16.25 | 15.93 | 16.37 | 15.33 | 15.47 | 16.36 | 15.05 |
| 0.510 | 0.87 | 1.83 Q80ZJ1 | Ras-related protein Rap-2a                                                    | Rap2a    | 610  | 8   | 8   | 8   | 30.8   | 30.8   | 30.8   | 25.976  | 0.0000 | 18.22  | 369640000 | 531 | 20.28 | 19.93 | 20.14 | 19.13 | 19.26 | 19.52 | 19.05 |
| 2.984 | 0.87 | 1.83 Q80ZJ1 | Ras-related protein Rap-2a                                                    | Rap2a    | 2914 | 9   | 9   | 9   | 58.5   | 58.5   | 58.5   | 20.642  | 0.0000 | 21.515 | 18821000  | 112 | 16.79 | 16.49 | 16.30 | 15.61 | 13.92 | 16.20 | 16.88 |
| 0.728 | 0.87 | 1.83 Q9DCE1 | Mitochondrial-processing peptidase subunit alpha                              | Pmpca    | 2517 | 22  | 22  | 22  | 51.3   | 51.3   | 51.3   | 58.278  | 0.0000 | 236.9  | 61220000  | 467 | 16.96 | 16.70 | 16.72 | 16.09 | 15.84 | 16.06 | 15.71 |
| 0.591 | 0.87 | 1.83 Q6ZPY7 | Leucine-rich repeat/flightless-interacting protein 1                          | Lfrp1    | 2046 | 8   | 8   | 8   | 17.3   | 17.3   | 17.3   | 79.246  | 0.0000 | 47.139 | 4674400   | 72  | 14.25 | 15.04 | 13.28 | 16.51 | 13.06 | 15.12 | 12.60 |
| 1.856 | 0.87 | 1.83 Q8VEE4 | Lysine-specific demethylase 3B                                                | Kdm3b    | 5187 | 9   | 9   | 9   | 10.7   | 10.7   | 10.7   | 170.87  | 0.0000 | 47.317 | 7042300   | 53  | 14.85 | 14.39 | 15.23 | 14.64 | 14.45 | 12.15 | 14.57 |
| 0.569 | 0.87 | 1.83 Q37E22 | Replication protein A 70 kDa DNA-binding subunit/Replication protein A 70 kDa | Rpa1     | 4002 | 16  | 16  | 16  | 28.9   | 28.9   | 28.9   | 69.036  | 0.0000 | 111.83 | 23353000  | 240 | 15.72 | 15.74 | 15.67 | 14.99 | 15.06 | 14.25 | 15.06 |
| 0.257 | 0.87 | 1.82 P62627 | Oxysterol-binding protein 1                                                   | Osbp     | 1808 | 21  | 21  | 21  | 31.8   | 31.8   | 31.8   | 88.796  | 0.0000 | 222.77 | 36195000  | 327 | 15.93 | 15.38 | 15.59 | 15.51 | 13.10 | 15.61 | 14.84 |
| 0.666 | 0.87 | 1.82 Q91VK1 | Oxysterol-binding protein 1                                                   | Osbp     | 1808 | 21  | 21  | 21  | 31.8   | 31.8   | 31.8   | 88.796  | 0.0000 | 222.77 | 36195000  | 327 | 15.93 | 15.38 | 15.59 | 15.51 | 13.10 | 15.61 | 14.84 |
| 1.977 | 0.86 | 1.82 Q8BHQ1 | Basic leucine zipper and W2 domain-containing protein 2                       | Bzwl2    | 1432 | 6   | 6   | 6   | 64.6   | 64.6   | 64.6   | 10.95   | 0.0000 | 17.657 | 18540000  | 172 | 16.51 | 16.54 | 17.15 | 17.93 | 13.84 | 17.47 | 13.73 |
| 1.031 | 0.86 | 1.82 P55284 | Nardilysin                                                                    | Nrd1     | 1797 | 7   | 7   | 7   | 21     | 21     | 21     | 19.3    | 0.0000 | 55.35  | 7467200   | 109 | 15.21 | 14.65 | 15.11 | 14.93 | 12.71 | 14.73 | 14.14 |
| 1.000 | 0.86 | 1.81 Q92Z90 | Adenosine kinase                                                              | Adk      | 3036 | 26  | 26  | 26  | 31.5   | 31.5   | 31.5   | 132.893 | 0.0000 | 156.75 | 29181000  | 295 | 16.62 | 16.29 | 16.41 | 15.93 | 15.71 | 15.56 |       |

|        |      |              |                                                                              |         |      |    |    |    |      |        |        |        |        |          |           |       |       |       |       |       |       |       |       |
|--------|------|--------------|------------------------------------------------------------------------------|---------|------|----|----|----|------|--------|--------|--------|--------|----------|-----------|-------|-------|-------|-------|-------|-------|-------|-------|
| 1.154  | 0.81 | 1.75 Q61165  | Sodium/hydrogen exchanger 1                                                  | Sic9a1  | 2265 | 8  | 8  | 8  | 15.7 | 15.7   | 15.7   | 91.467 | 0.0000 | 95.407   | 6639600   | 100   | 15.32 | 15.15 | 15.45 | 15.06 | 13.69 | 14.60 | 14.69 |
| 1.466  | 0.80 | 1.75 Q91W78  | RNA-binding protein 47                                                       | Rbm47   | 4128 | 14 | 14 | 14 | 45.4 | 45.4   | 45.4   | 64.061 | 0.0000 | 153.25   | 35592000  | 264   | 16.56 | 16.60 | 16.83 | 16.14 | 15.23 | 16.25 | 15.82 |
| 0.137  | 0.80 | 1.74 Q7N582  | MICOS complex subunit Mic10                                                  | Mnos1   | 2764 | 3  | 3  | 3  | 14.5 | 14.5   | 14.5   | 8.5669 | 0.0002 | 5.9123   | 70079000  | 24    | 19.04 | 19.10 | 18.99 | 12.71 | 20.45 | 19.88 | 19.93 |
| 2.057  | 0.80 | 1.74 P62482  | Voltage-gated potassium channel subunit beta-2                               | Kcnab2  | 2140 | 24 | 24 | 24 | 71.4 | 66.2   | 61.4   | 41.021 | 0.0000 | 323.31   | 131936000 | 621   | 18.15 | 17.58 | 17.57 | 17.22 | 16.83 | 16.96 | 16.89 |
| 0.521  | 0.80 | 1.74 P73303  | ATP domain-containing protein 1                                              | Ctbp2   | 1551 | 24 | 22 | 24 | 50.3 | 65.514 | 65.514 | 65.514 | 0.0000 | 79.629   | 55094000  | 456   | 16.58 | 16.45 | 16.57 | 16.22 | 15.94 | 16.45 | 16.17 |
| 1.2102 | 0.80 | 1.74 Q5NCR9  | Nuclear speckle splicing regulatory protein 1                                | Nsrp1   | 2139 | 6  | 6  | 6  | 13.1 | 13.1   | 13.1   | 63.798 | 0.0000 | 20.8     | 3044100   | 19    | 13.05 | 14.32 | 13.35 | 13.00 | 12.69 | 12.68 | 12.74 |
| 0.931  | 0.80 | 1.74 Q3UV70  | [Pyruvate dehydrogenase [acetyl-transferring]]-phosphatase 1, mitochondrial  | Pdp1    | 2036 | 11 | 11 | 11 | 33.8 | 33.8   | 33.8   | 61.18  | 0.0000 | 149.6    | 10469500  | 111   | 13.72 | 14.67 | 14.97 | 13.24 | 13.73 | 14.29 | 13.36 |
| 1.273  | 0.80 | 1.74 P55302  | Alpha-2-macroglobulin receptor-associated protein                            | Lrpap1  | 1272 | 23 | 23 | 23 | 61.4 | 61.4   | 61.4   | 42.215 | 0.0000 | 79.455   | 37290000  | 279   | 16.54 | 16.91 | 17.09 | 16.58 | 16.33 | 15.58 | 15.71 |
| 0.823  | 0.79 | 1.73 Q8WY14  | Aniamorin                                                                    | Clapm1  | 4036 | 5  | 5  | 5  | 27.2 | 27.2   | 27.2   | 33.429 | 0.0000 | 12.297   | 2570200   | 21    | 13.78 | 14.15 | 14.08 | 14.26 | 13.32 | 12.60 | 12.96 |
| 0.398  | 0.79 | 1.73 Q2YDW2  | Protein mita1 homolog 1                                                      | Mita1   | 1804 | 9  | 9  | 9  | 25.9 | 25.9   | 25.9   | 61.23  | 0.0000 | 33.596   | 5353400   | 37    | 14.71 | 14.25 | 14.25 | 14.28 | 13.60 | 12.02 | 15.45 |
| 1.366  | 0.79 | 1.73 Q9D379  | Epoxide hydrolase 1                                                          | Ephx1   | 4961 | 18 | 18 | 18 | 33   | 33     | 33     | 52.576 | 0.0000 | 77.051   | 22651000  | 167   | 15.90 | 15.52 | 14.86 | 14.87 | 14.73 | 14.28 | 14.65 |
| 0.974  | 0.79 | 1.73 P18242  | Cathepsin D                                                                  | Ctad    | 3636 | 27 | 27 | 25 | 56.6 | 56.6   | 55.1   | 44.953 | 0.0000 | 323.31   | 129510000 | 1402  | 21.38 | 21.46 | 21.65 | 20.58 | 20.58 | 20.78 | 20.87 |
| 3.083  | 0.79 | 1.73 Q8CHJ2  | E3 ubiquitin-protein ligase TRIM32                                           | Trim32  | 3519 | 5  | 5  | 5  | 10.1 | 10.1   | 10.1   | 72.057 | 0.0000 | 18.869   | 4381200   | 49    | 14.66 | 13.43 | 13.93 | 13.01 | 13.38 | 13.77 | 12.72 |
| 1.577  | 0.79 | 1.72 A2ADY9  | Protein Dd11 homolog 2                                                       | Dd2     | 18   | 12 | 12 | 12 | 58.4 | 58.4   | 58.4   | 44.59  | 0.0000 | 316.11   | 85058000  | 469   | 17.06 | 17.12 | 17.33 | 17.21 | 14.87 | 16.86 | 16.50 |
| 0.595  | 0.78 | 1.72 Q9QLC9  | Peroxisome assembly factor 2                                                 | Pex6    | 4419 | 3  | 3  | 3  | 7    | 7      | 7      | 104.55 | 0.0000 | 47.747   | 2056300   | 45    | 13.56 | 12.56 | 14.32 | 12.15 | 13.14 | 12.01 | 13.50 |
| 0.567  | 0.78 | 1.72 Q9EQJ0  | Two pore calcium channel protein 1                                           | Tpcn1   | 5281 | 4  | 4  | 4  | 6.1  | 6.1    | 6.1    | 94.495 | 0.0000 | 7.9797   | 3736600   | 27    | 14.36 | 14.06 | 14.41 | 12.23 | 13.03 | 14.49 | 14.23 |
| 0.842  | 0.78 | 1.72 Q921Q2  | Abhydrolase domain-containing protein 16A                                    | Abhd16a | 5817 | 16 | 16 | 16 | 36   | 36     | 36     | 63.085 | 0.0000 | 83.362   | 19348000  | 178   | 15.32 | 15.06 | 15.09 | 14.99 | 13.37 | 14.92 | 14.22 |
| 0.824  | 0.78 | 1.72 Q88676  | Short-chain dehydrogenase/reductase 3                                        | Dhrs3   | 580  | 6  | 6  | 6  | 21.5 | 21.5   | 21.5   | 33.652 | 0.0000 | 223.02   | 63862000  | 238   | 15.71 | 14.33 | 14.77 | 16.15 | 18.50 | 18.36 | 18.92 |
| 1.173  | 0.78 | 1.72 Q9JIA7  | Sphingosine kinase 2                                                         | Sphk2   | 5393 | 14 | 14 | 14 | 38.2 | 38.2   | 38.2   | 65.617 | 0.0000 | 172.7    | 23017000  | 201   | 16.38 | 16.00 | 16.34 | 15.92 | 13.68 | 16.57 | 15.57 |
| 0.795  | 0.78 | 1.71 P51880  | Fatty acid-binding protein, brain                                            | Fabp7   | 1207 | 5  | 5  | 5  | 45.5 | 45.5   | 45.5   | 14.893 | 0.0000 | 13.053   | 9114800   | 110   | 15.11 | 15.46 | 15.79 | 15.76 | 14.08 | 14.51 | 14.37 |
| 1.055  | 0.77 | 1.71 Q9R0C8  | Guanine nucleotide exchange factor VAV3                                      | Vav3    | 5622 | 11 | 10 | 10 | 16.6 | 15.5   | 15.5   | 97.967 | 0.0000 | 61.044   | 6007200   | 59    | 14.89 | 15.01 | 15.34 | 13.92 | 14.48 | 15.06 | 13.77 |
| 0.473  | 0.77 | 1.71 P61079  | Ubiquitin-conjugating enzyme E2 D3                                           | Ube2d3  | 1368 | 6  | 6  | 6  | 48.3 | 48.3   | 48.3   | 12.2   | 0.0000 | 223.02   | 63862000  | 238   | 15.71 | 14.33 | 14.77 | 16.15 | 18.50 | 18.36 | 18.92 |
| 3.435  | 0.77 | 1.70 Q64514  | Tripeptide-peptidase 2                                                       | Tpp2    | 2449 | 84 | 84 | 84 | 63.8 | 63.8   | 63.8   | 139.85 | 0.0000 | 323.31   | 591750000 | 2091  | 19.43 | 19.25 | 19.24 | 18.64 | 16.55 | 18.42 | 18.44 |
| 1.424  | 0.77 | 1.70 P58281  | Dynamitin-like 120 kDa protein, mitochondrial;Dynamitin-like 120 kDa protein | Opta1   | 1313 | 54 | 54 | 54 | 61.6 | 61.6   | 61.6   | 111.34 | 0.0000 | 323.31   | 117220000 | 903   | 16.64 | 16.41 | 16.53 | 16.26 | 15.16 | 15.78 | 15.84 |
| 0.786  | 0.77 | 1.70 Q9D7J6  | Deoxyribonuclease-1-like 1                                                   | Dnase11 | 5033 | 5  | 5  | 5  | 19.4 | 19.4   | 19.4   | 35.604 | 0.0000 | 56.793   | 3741400   | 62    | 14.67 | 14.25 | 14.07 | 14.51 | 13.80 | 13.15 | 12.81 |
| 0.377  | 0.77 | 1.70 Q91V11  | Indole-3-pyruvate decarboxylase                                              | Anm2    | 4061 | 9  | 9  | 9  | 4    | 4      | 4      | 10.155 | 0.0000 | 62.365   | 5788100   | 60    | 14.62 | 14.28 | 14.07 | 15.49 | 16.83 | 13.97 | 15.83 |
| 0.421  | 0.77 | 1.70 Q9H116  | Vesicle transport through interaction with t-SNAREs homolog 1A               | Vt1a    | 392  | 4  | 4  | 4  | 39.2 | 39.2   | 39.2   | 24.986 | 0.0000 | 99.06    | 1052300   | 128   | 15.56 | 15.21 | 15.47 | 15.65 | 15.21 | 15.47 | 15.32 |
| 0.392  | 0.76 | 1.70 Q8R2K1  | Fucose mutarotase                                                            | Fuom    | 3807 | 3  | 3  | 3  | 33.3 | 33.3   | 33.3   | 16.805 | 0.0000 | 22.478   | 5386500   | 86    | 14.79 | 14.99 | 14.94 | 14.19 | 15.48 | 12.17 | 14.73 |
| 1.323  | 0.76 | 1.70 P11440  | Cyclin-dependent kinase 1                                                    | Cdk1    | 744  | 12 | 10 | 10 | 54.2 | 47.8   | 34.106 | 0.0000 | 40.695 | 11099000 | 99        | 15.73 | 16.08 | 15.31 | 15.01 | 15.00 | 15.34 | 14.43 |       |
| 1.389  | 0.76 | 1.70 Q9CP08  | ATP synthase subunit g, mitochondrial                                        | Atp5l   | 4527 | 6  | 6  | 6  | 50.5 | 50.5   | 50.5   | 11.424 | 0.0000 | 70.611   | 95726000  | 225   | 19.41 | 19.12 | 18.95 | 18.50 | 17.75 | 16.73 | 16.81 |
| 1.454  | 0.76 | 1.70 Q9JUF6  | Protein arginine N-methyltransferase 1                                       | Prmt1   | 5395 | 12 | 12 | 12 | 38.8 | 38.8   | 38.8   | 42.435 | 0.0000 | 132.69   | 52902000  | 319   | 16.80 | 16.80 | 17.28 | 16.80 | 16.80 | 16.80 | 16.80 |
| 0.982  | 0.76 | 1.70 P31786  | Acy-CoA-binding protein                                                      | Dbi     | 4900 | 9  | 9  | 8  | 85.1 | 83.9   | 10     | 0.0000 | 72.266 | 29149000 | 159       | 17.06 | 17.90 | 17.61 | 17.48 | 16.39 | 16.28 | 16.90 |       |
| 0.818  | 0.76 | 1.69 Q8VD58  | Syntaxin-18                                                                  | Sxt18   | 3971 | 10 | 10 | 10 | 32.9 | 32.9   | 32.9   | 38.381 | 0.0000 | 38.889   | 8733600   | 121   | 15.19 | 15.00 | 15.20 | 15.15 | 13.38 | 14.69 | 14.25 |
| 0.816  | 0.76 | 1.69 Q9JKB3  | Y-box-binding protein 3                                                      | Ybx3    | 5447 | 7  | 2  | 2  | 25.2 | 13.9   | 13.9   | 38.813 | 0.0000 | 19.72    | 1530000   | 29    | 13.90 | 13.68 | 15.00 | 13.49 | 12.99 | 14.11 | 13.14 |
| 1.318  | 0.76 | 1.69 Q96766  | 18-mannosyl-glycoprotein 2-beta-N-acetylglucosaminyltransferase              | Mgat2   | 5365 | 12 | 12 | 12 | 7.2  | 51.029 | 51.029 | 7.2    | 0.0000 | 9.7895   | 24006000  | 133   | 14.52 | 13.93 | 14.25 | 13.26 | 13.92 | 14.24 | 12.77 |
| 1.092  | 0.76 | 1.69 Q8C0L0  | Thioredoxin-related transmembrane protein 4                                  | Tmx4    | 3341 | 6  | 6  | 6  | 24.8 | 24.8   | 24.8   | 37.131 | 0.0000 | 67.716   | 5416800   | 64    | 14.67 | 13.98 | 14.32 | 13.87 | 13.90 | 12.81 | 13.69 |
| 0.430  | 0.76 | 1.69 Q8CA72  | Glixaxoin                                                                    | Gan     | 3426 | 6  | 6  | 5  | 10.2 | 10.2   | 10.2   | 67.67  | 0.0000 | 18.849   | 7424500   | 62    | 15.19 | 14.79 | 15.35 | 12.46 | 14.69 | 15.28 | 14.97 |
| 0.454  | 0.76 | 1.69 Q8C0B8  | SLAMF motif-containing protein 2                                             | Slanf2  | 3536 | 10 | 10 | 9  | 20.3 | 20.3   | 20.3   | 62.377 | 0.0000 | 19.523   | 4670700   | 23    | 13.47 | 14.42 | 15.11 | 14.26 | 12.06 | 13.71 | 14.28 |
| 0.651  | 0.75 | 1.69 P48991  | Protein mita1 homolog 1                                                      | Mita1   | 2115 | 6  | 6  | 6  | 21.5 | 21.5   | 21.5   | 77.966 | 0.0000 | 32.562   | 11349000  | 121   | 14.23 | 14.23 | 14.68 | 14.23 | 14.23 | 14.68 | 14.33 |
| 0.825  | 0.75 | 1.69 Q70469  | Docking protein 2                                                            | Dok2    | 502  | 11 | 11 | 11 | 32   | 32     | 32     | 45.522 | 0.0000 | 14.118   | 15459000  | 63    | 16.03 | 15.73 | 15.87 | 15.99 | 15.15 | 15.17 | 14.18 |
| 0.917  | 0.75 | 1.69 P59326  | YTH domain-containing family protein 1                                       | Ythdf1  | 1335 | 10 | 6  | 4  | 21.3 | 15.2   | 12.7   | 60.878 | 0.0000 | 47.643   | 3988700   | 65    | 13.44 | 13.47 | 13.32 | 12.74 | 13.13 | 13.09 | 11.67 |
| 0.976  | 0.75 | 1.69 Q9R0J0  | Serine/arginine-rich splicing factor 10                                      | Srsf10  | 5642 | 8  | 8  | 8  | 24.4 | 24.4   | 24.4   | 31.3   | 0.0000 | 39.163   | 26846000  | 134   | 17.26 | 17.56 | 17.21 | 17.47 | 16.57 | 16.02 | 16.30 |
| 2.126  | 0.75 | 1.68 Q9D5D10 | ATPase family AAA domain-containing protein 1                                | Atad1   | 4985 | 9  | 9  | 9  | 31.9 | 31.9   | 31.9   | 40.744 | 0.0000 | 97.208   | 18570000  | 211   | 15.60 | 15.19 | 15.21 | 14.90 | 14.49 | 14.38 | 14.54 |
| 0.965  | 0.75 | 1.68 Q9P4M1  | Tubulin                                                                      | Tuba1b  | 1475 | 16 | 16 | 16 | 39.9 | 62.368 | 62.368 | 39.9   | 0.0000 | 69.917   | 15895000  | 144   | 15.27 | 16.01 | 15.37 | 15.25 | 14.07 | 15.32 | 15.07 |
| 0.985  | 0.75 | 1.68 Q8Y0X8  | Protein RMD5 homolog A                                                       | Rmd5a   | 2040 | 6  | 6  | 6  | 21.7 | 21.7   | 21.7   | 43.992 | 0.0000 | 15.66    | 5253100   | 89    | 13.81 | 13.69 | 13.97 | 12.42 | 13.40 | 12.86 | 13.62 |
| 0.440  | 0.75 | 1.68 Q8B8G7  | Enolase-phosphatase E1                                                       | Enoph1  | 2974 | 5  | 5  | 5  | 32.3 | 32.3   | 32.3   | 63     | 0.0000 | 37.314   | 4784600   | 93    | 14.55 | 14.49 | 13.59 | 14.80 | 12.97 | 13.91 | 12.03 |
| 3.006  | 0.75 | 1.68 P61202  | CDP signalosome complex subunit 2                                            | Cope2   | 1375 | 21 | 21 | 21 | 63   | 63     | 63     | 51.596 | 0.0000 | 323.31   | 59939000  | 479   | 16.69 | 16.43 | 16.63 | 15.94 | 15.64 | 15.93 | 15.84 |
| 1.454  | 0.75 | 1.68 Q9D9V0  | ER-hand domain-containing protein D2                                         | Ehfd2   | 5082 | 27 | 27 | 27 | 61.7 | 26.791 | 26.791 | 61.7   | 0.0000 | 123.55   | 49296000  | 168   | 16.89 | 17.38 | 17.16 | 16.90 | 15.97 | 16.28 | 16.43 |
| 0.402  | 0.75 | 1.68 Q9CR27  | WASH complex subunit CDC5C3                                                  | Cdc5c3  | 4662 | 5  | 5  | 3  | 35.1 | 22.7   | 21.092 | 0.0000 | 6.824  | 6286400  | 34        | 14.69 | 15.01 | 15.16 | 15.54 | 13.22 | 12.90 | 15.18 |       |
| 0.964  | 0.74 | 1.67 P23298  | Protein kinase C eta type                                                    | Pkchc   | 482  | 4  | 4  | 4  | 7.5  | 7.5    | 7.5    | 77.918 | 0.0000 | 8.3028   | 2952600   | 44    | 13.77 | 13.61 | 14.03 | 13.62 | 13.05 | 12.19 | 13.37 |
| 0.567  | 0.74 | 1.67 Q9QYB5  | Gamma-adducin                                                                | Adc3    | 5567 | 9  | 9  | 9  | 19.3 | 19.3   | 19.3   | 78.776 | 0.0000 | 67.75    | 5857500   | 66    | 14.73 | 14.38 | 14.49 | 14.04 | 14.47 | 12.55 | 13.60 |
| 0.323  | 0.74 | 1.67 Q9R0M6  | Ras-related protein Rab-BA                                                   | Rab1e   | 4614 | 7  | 7  | 7  | 46.8 | 22.908 | 22.908 | 46.8   | 0.0000 | 101.85   | 19436000  | 137   | 16.32 | 16.37 | 16.57 | 16.37 | 13.25 | 16.63 | 16.41 |
| 0.572  | 0.74 | 1.67 Q8K0Z7  | Translational activator of cytochrome c oxidase 1                            | Taco1   | 3811 | 8  | 8  | 8  |      |        |        |        |        |          |           |       |       |       |       |       |       |       |       |

|       |      |        |                                             |                                                                              |             |      |      |      |      |      |      |        |        |        |         |          |       |       |       |       |       |       |       |       |
|-------|------|--------|---------------------------------------------|------------------------------------------------------------------------------|-------------|------|------|------|------|------|------|--------|--------|--------|---------|----------|-------|-------|-------|-------|-------|-------|-------|-------|
| 0.983 | 0.70 | 1.62   | Q9CWD8                                      | Iron-sulfur protein NUBPL                                                    | Nubpl       | 4710 | 4    | 4    | 4    | 23.5 | 23.5 | 23.5   | 34.139 | 0.0000 | 31.185  | 2826200  | 43    | 14.31 | 14.45 | 14.61 | 13.42 | 13.33 | 14.60 | 13.70 |
| 2.857 | 0.70 | 1.62   | Q821N5                                      | Spliceosome RNA helicase Ddx39b                                              | Ddx39b      | 5815 | 26   | 11   | 11   | 65.7 | 38.1 | 38.1   | 49.035 | 0.0000 | 32.331  | 8038800  | 419   | 18.22 | 17.85 | 18.02 | 17.38 | 17.23 | 17.46 | 17.27 |
| 0.398 | 0.69 | 1.62   | P53612                                      | Geranylgeranyl transferase type-2 subunit beta                               | Rabggtb     | 1284 | 3    | 3    | 3    | 10.6 | 10.6 | 10.6   | 37.803 | 0.0000 | 8.1985  | 6979300  | 35    | 14.74 | 15.36 | 14.76 | 15.25 | 12.96 | 13.43 | 15.39 |
| 1.062 | 0.69 | 1.62   | Q8R123                                      | FAD synthase,Molybdenum cofactor biosynthesis protein-like region:FAD        | F1ad1       | 3773 | 6    | 6    | 6    | 20.5 | 20.5 | 20.5   | 54.766 | 0.0000 | 59.061  | 1123400  | 114   | 15.62 | 15.02 | 14.77 | 14.46 | 14.95 | 14.43 | 13.92 |
| 0.445 | 0.69 | 1.62   | Q9C946                                      | Hydroxyacyl phosphopant transferase                                          | Hpa15       | 48.5 | 5    | 5    | 5    | 48.5 | 48.5 | 48.5   | 15.054 | 0.0000 | 45.818  | 4701730  | 52    | 14.32 | 15.14 | 14.68 | 14.74 | 14.42 | 15.14 | 14.68 |
| 0.407 | 0.69 | 1.61   | P63878                                      | Tubulin gamma-1 chain;Tubulin gamma-2 chain                                  | Tubg1;Tubg2 | 1604 | 10   | 10   | 10   | 41   | 41   | 41     | 51.1   | 0.0000 | 108.065 | 8161500  | 99    | 15.39 | 14.84 | 14.88 | 13.31 | 13.31 | 15.65 | 15.13 |
| 0.408 | 0.69 | 1.61   | Q9ES74                                      | Serine/threonine-protein kinase Nek7                                         | Nek7        | 5332 | 15   | 15   | 13   | 58.9 | 58.9 | 53.3   | 34.537 | 0.0000 | 90.715  | 34016000 | 340   | 16.05 | 15.85 | 16.10 | 16.09 | 13.47 | 15.80 | 15.88 |
| 2.097 | 0.69 | 1.61   | Q8VDW0                                      | ATP-dependent RNA helicase DDX39A                                            | Ddx39a      | 3975 | 27   | 27   | 11   | 65.6 | 65.6 | 39.6   | 49.067 | 0.0000 | 269.37  | 15802000 | 577   | 18.72 | 18.26 | 18.58 | 17.67 | 17.71 | 18.10 | 17.83 |
| 0.920 | 0.69 | 1.61   | Q3ULP5                                      | Protein Cbf37 homolog                                                        | Cbf37       | 1985 | 2    | 2    | 2    | 13.9 | 13.9 | 13.9   | 23.848 | 0.0000 | 15.335  | 4760100  | 66    | 14.66 | 14.32 | 14.69 | 14.53 | 13.19 | 14.17 | 13.57 |
| 0.903 | 0.69 | 1.61   | Q8R349                                      | Cell division cycle protein 16 homolog                                       | Cdc16       | 3833 | 9    | 9    | 9    | 9.4  | 9.4  | 71     | 459    | 0.0000 | 10.569  | 2712000  | 30    | 13.93 | 13.60 | 13.66 | 13.66 | 12.21 | 13.01 | 13.30 |
| 0.349 | 0.69 | 1.61   | Q91X87                                      | Protein YIF1A                                                                | Yif1a       | 4140 | 2    | 2    | 2    | 7.2  | 7.2  | 7.2    | 32.134 | 0.0000 | 10.094  | 6046600  | 41    | 15.08 | 14.65 | 14.61 | 14.62 | 14.67 | 15.07 | 12.04 |
| 1.792 | 0.68 | 1.61   | Q9ZXX1                                      | Heterogeneous nuclear ribonucleoprotein F:Heterogeneous nuclear ribon        | Hnmpf       | 5870 | 26   | 26   | 24   | 68   | 68   | 65.5   | 45.729 | 0.0000 | 32.331  | 16336000 | 689   | 18.82 | 19.22 | 19.14 | 18.39 | 18.44 | 18.01 | 18.40 |
| 1.267 | 0.68 | 1.61   | P68368                                      | Tubulin alpha-4A chain                                                       | Tuba4a      | 1516 | 33   | 9    | 9    | 58.7 | 16.5 | 16.5   | 49.924 | 0.0000 | 97.877  | 83518000 | 272   | 18.47 | 18.44 | 18.40 | 17.68 | 17.15 | 15.00 | 18.17 |
| 0.972 | 0.68 | 1.61   | Q9B642                                      | Protein-arginine deiminase type-2                                            | Padi2       | 1765 | 7    | 7    | 7    | 14.3 | 14.3 | 14.3   | 76.249 | 0.0000 | 54.062  | 62485000 | 77    | 16.92 | 19.04 | 18.06 | 18.06 | 18.48 | 18.16 | 18.51 |
| 0.515 | 0.68 | 1.61   | Q8Y98                                       | Phospholipase DDHD2                                                          | Dhd2        | 2898 | 7    | 7    | 7    | 13.9 | 13.9 | 13.9   | 79.576 | 0.0000 | 18.194  | 4740000  | 32    | 14.52 | 14.51 | 13.99 | 14.82 | 12.13 | 14.06 | 12.61 |
| 0.263 | 0.68 | 1.60   | Q8BL86                                      | Metallo-beta-lactamase domain-containing protein 2                           | Mblac2      | 3113 | 3    | 3    | 3    | 15.1 | 15.1 | 15.1   | 31.205 | 0.0000 | 12.083  | 7135700  | 26    | 16.30 | 16.31 | 16.15 | 16.69 | 12.93 | 16.14 | 16.53 |
| 3.389 | 0.68 | 1.60   | Q8RH41                                      | Ubiquitin carboxy-terminal hydrolase 15                                      | Usp15       | 3889 | 35   | 35   | 34   | 44.1 | 44.1 | 43.2   | 112.32 | 0.0000 | 283.76  | 45331000 | 424   | 16.46 | 16.43 | 16.36 | 15.85 | 15.56 | 15.84 | 15.70 |
| 0.167 | 0.68 | 1.60   | Q9CWE3                                      | RNA-binding protein BA                                                       | Rbm8a       | 4740 | 4    | 4    | 4    | 32.2 | 32.2 | 32.2   | 19.899 | 0.0000 | 112.62  | 3093000  | 26    | 11.58 | 15.58 | 14.38 | 14.31 | 15.19 | 10.56 | 12.59 |
| 0.787 | 0.68 | 1.60   | P70404                                      | Isoactate dehydrogenase [NAD] subunit gamma 1, mitochondrial                 | Ish3g       | 1567 | 15   | 15   | 15   | 48.1 | 48.1 | 48.1   | 42.785 | 0.0000 | 32.331  | 47939000 | 325   | 16.73 | 16.30 | 16.56 | 15.23 | 16.75 | 15.99 | 15.43 |
| 1.909 | 0.68 | 1.60   | Q9QZET                                      | Transin-associated protein X                                                 | Tsnax       | 5596 | 22   | 22   | 22   | 79   | 79   | 79     | 32.926 | 0.0000 | 227.54  | 52044000 | 432   | 16.90 | 16.66 | 16.73 | 16.38 | 16.20 | 16.03 | 15.72 |
| 0.370 | 0.68 | 1.60   | Q64281                                      | Leukocyte immunoglobulin-like receptor subfamily B member 4                  | Lir4b       | 428  | 5    | 5    | 5    | 26   | 26   | 26     | 37.544 | 0.0000 | 26.155  | 11635000 | 74    | 17.12 | 17.36 | 15.70 | 14.39 | 16.65 | 16.57 | 16.88 |
| 2.274 | 0.68 | 1.60   | Q8K1X1                                      | WD repeat-containing protein 11                                              | Wdr11       | 3635 | 29   | 29   | 29   | 33.8 | 33.8 | 33.8   | 135.94 | 0.0000 | 256.77  | 26999000 | 322   | 16.08 | 15.64 | 15.66 | 15.06 | 15.31 | 14.99 | 15.30 |
| 2.696 | 0.68 | 1.60   | Q54734                                      | Dodecyl-phosphatidylglycerol-phosphate-protein glycosyltransferase 48 kDa su | Ddost       | 418  | 18   | 18   | 18   | 48.1 | 48.1 | 48.1   | 49.027 | 0.0000 | 32.331  | 15004000 | 490   | 18.97 | 18.81 | 18.95 | 18.24 | 17.92 | 18.15 | 18.22 |
| 0.660 | 0.68 | 1.60   | Q8K1C9                                      | Leucine-rich repeat-containing protein 41                                    | Lrrc41      | 3624 | 5    | 5    | 5    | 9    | 9    | 9      | 88.179 | 0.0000 | 15.575  | 1993000  | 36    | 14.05 | 13.74 | 13.64 | 13.64 | 13.06 | 12.04 | 13.79 |
| 1.238 | 0.67 | 1.60   | Q8VD66                                      | Amylase domain-containing protein 4                                          | Ahb4a       | 2945 | 4    | 4    | 4    | 16.1 | 16.1 | 16.1   | 38.86  | 0.0000 | 11.942  | 4463900  | 46    | 15.42 | 14.77 | 15.05 | 14.15 | 14.01 | 14.66 | 14.77 |
| 0.663 | 0.67 | 1.60   | Q61127                                      | Norf-A-binding protein 2                                                     | Nab2        | 3253 | 6    | 6    | 5    | 13.3 | 13.3 | 13.3   | 16.576 | 0.0000 | 37.455  | 37202400 | 30    | 14.44 | 14.37 | 14.60 | 13.03 | 14.45 | 13.45 | 14.91 |
| 0.729 | 0.67 | 1.60   | Q9QZS7                                      | HES1-like protein                                                            | Hes1        | 142  | 14   | 14   | 14   | 24.2 | 24.2 | 24.2   | 75.1   | 0.0000 | 22.163  | 4945400  | 69    | 14.43 | 14.42 | 13.75 | 14.38 | 12.74 | 13.81 | 13.15 |
| 2.603 | 0.67 | 1.59   | Q9CQ07                                      | ATP synthase F(0) complex subunit B1, mitochondrial                          | Atp5f1      | 4622 | 25   | 25   | 25   | 68.8 | 68.8 | 68.8   | 28.948 | 0.0000 | 32.30   | 47017000 | 884   | 20.10 | 19.60 | 19.87 | 19.16 | 19.20 | 19.19 | 19.18 |
| 0.271 | 0.67 | 1.59   | P56391                                      | Cytochrome c oxidase subunit 6B1                                             | Cox6b1      | 1284 | 3    | 3    | 3    | 53.5 | 53.5 | 53.5   | 10.071 | 0.0004 | 4.8241  | 8940800  | 32    | 14.06 | 17.30 | 16.51 | 13.79 | 15.27 | 15.94 | 15.85 |
| 0.797 | 0.67 | 1.59   | Q3JUK4                                      | Protein FAM53F                                                               | Fam53f      | 1899 | 3    | 3    | 3    | 10.7 | 10.7 | 10.7   | 55.012 | 0.0000 | 63.221  | 1952000  | 40    | 13.90 | 14.01 | 14.65 | 13.92 | 13.60 | 13.89 | 12.64 |
| 0.819 | 0.67 | 1.59   | Q9UK44                                      | Nucleolar UAP repeat-containing protein 1b                                   | Nap1b       | 551  | 13.5 | 13.5 | 13.5 | 13.5 | 13.5 | 13.5   | 164.08 | 0.0000 | 53.067  | 9702500  | 47    | 14.68 | 14.32 | 14.68 | 14.32 | 14.32 | 14.68 | 14.32 |
| 0.884 | 0.67 | 1.59   | P21107                                      | Tropomyosin alpha-3 chain                                                    | Tpm3        | 1859 | 17   | 17   | 8    | 47.4 | 47.4 | 27.4   | 32.994 | 0.0000 | 304.224 | 10780000 | 380   | 18.11 | 18.55 | 18.39 | 18.22 | 18.07 | 16.89 | 17.55 |
| 1.471 | 0.67 | 1.59   | P63330                                      | Serine/threonine-protein phosphatase 2A catalytic subunit alpha isoform      | Ppp2ca      | 1507 | 28   | 28   | 7    | 85.4 | 85.4 | 85.4   | 35.608 | 0.0000 | 32.331  | 11399000 | 636   | 18.02 | 17.86 | 17.72 | 16.88 | 17.56 | 17.24 | 17.31 |
| 1.366 | 0.67 | 1.59   | Q9RL85                                      | Elongator complex protein 5                                                  | Elp5        | 4411 | 3    | 3    | 3    | 21.7 | 21.7 | 21.7   | 33.497 | 0.0000 | 6.725   | 2567800  | 32    | 14.06 | 14.09 | 14.29 | 13.60 | 12.88 | 13.65 | 13.78 |
| 0.633 | 0.67 | 1.59   | Q9C251                                      | Adrenin alpha-1                                                              | Adm3        | 4833 | 19   | 16   | 16   | 41   | 41   | 41     | 57.552 | 0.0000 | 100.26  | 3128000  | 26    | 16.26 | 16.08 | 15.96 | 16.08 | 15.63 | 15.96 | 15.96 |
| 0.334 | 0.67 | 1.59   | Q9CQ86                                      | Transmembrane protein 14C                                                    | Tmem14c     | 4616 | 3    | 3    | 3    | 50   | 50   | 50     | 11.642 | 0.0000 | 16.032  | 4899400  | 62    | 15.42 | 14.65 | 14.63 | 13.00 | 15.77 | 13.15 | 15.01 |
| 0.274 | 0.67 | 1.59   | Q8K212                                      | Phosphofurin acidic cluster sorting protein 1                                | Pacs1       | 3640 | 10   | 10   | 10   | 18   | 18   | 18     | 104.83 | 0.0000 | 48.196  | 8398700  | 81    | 14.53 | 14.77 | 14.98 | 15.18 | 11.60 | 14.88 | 14.70 |
| 1.454 | 0.67 | 1.59   | Q9Q939                                      | 3-mercaptopurinate sulfotransferase                                          | Mps1        | 4335 | 14   | 14   | 14   | 49.2 | 49.2 | 49.2   | 33.097 | 0.0000 | 65.726  | 1843000  | 132   | 15.26 | 14.69 | 15.07 | 15.38 | 12.93 | 14.62 | 14.22 |
| 0.67  | 1.59 | Q9Q2X2 | Non-ATPase non-ATPase regulatory subunit 10 | Psm10                                                                        | 5873        | 3    | 3    | 3    | 16.9 | 16.9 | 16.9 | 25.083 | 0.0000 | 21.163 | 6201800 | 69       | 14.42 | 14.79 | 15.07 | 14.42 | 14.47 | 14.67 | 14.67 |       |
| 0.241 | 0.66 | 1.58   | Q9CFD0                                      | E3 ubiquitin-protein ligase NEDD4-like                                       | Nedd4       | 1486 | 10   | 10   | 10   | 15.3 | 15.3 | 15.3   | 115.42 | 0.0000 | 24.342  | 7237500  | 60    | 15.46 | 15.86 | 15.68 | 15.21 | 14.41 | 15.02 | 15.37 |
| 0.392 | 0.66 | 1.58   | Q8BG04                                      | Zinc-binding alcohol dehydrogenase domain-containing protein 2               | Zad2        | 2976 | 11   | 11   | 11   | 47.7 | 47.7 | 47.7   | 40.528 | 0.0000 | 22.906  | 1226300  | 97    | 15.71 | 15.66 | 15.53 | 15.48 | 13.13 | 15.52 | 15.75 |
| 0.566 | 0.66 | 1.58   | Q9ER41                                      | Torsin-1B                                                                    | Tor1b       | 5294 | 5    | 5    | 5    | 18.5 | 18.5 | 18.5   | 37.817 | 0.0000 | 52.215  | 3889800  | 46    | 13.94 | 14.54 | 14.21 | 13.26 | 13.38 | 14.82 | 12.81 |
| 1.839 | 0.66 | 1.58   | Q9WTY3                                      | Glycosylphosphatidylinositol anchor attachment 1 protein                     | Gpaal1      | 5675 | 5    | 5    | 5    | 11   | 11   | 11     | 67.948 | 0.0000 | 27.356  | 1255700  | 85    | 16.01 | 15.72 | 15.98 | 14.85 | 15.28 | 15.45 | 15.40 |
| 0.774 | 0.66 | 1.58   | Q8YD96                                      | Helicase domain-containing protein 39C                                       | Htc39c      | 3974 | 17   | 17   | 17   | 40.1 | 40.1 | 40.1   | 55.183 | 0.0000 | 62.018  | 6201800  | 69    | 14.42 | 14.79 | 15.07 | 14.42 | 14.47 | 14.67 | 14.67 |
| 0.239 | 0.66 | 1.58   | Q9CR29                                      | Collet-coil domain-containing protein 43                                     | Ccdc43      | 4663 | 7    | 7    | 7    | 40.1 | 40.1 | 40.1   | 25.049 | 0.0000 | 84.577  | 3095000  | 27    | 12.16 | 15.27 | 11.56 | 12.49 | 12.53 | 13.26 | 11.07 |
| 1.387 | 0.66 | 1.58   | Q8CE50                                      | Sorting nexin-30                                                             | Snx30       | 3467 | 16   | 16   | 16   | 51.5 | 51.5 | 51.5   | 49.52  | 0.0000 | 127.34  | 14962000 | 163   | 15.80 | 15.31 | 15.19 | 15.09 | 14.42 | 14.97 | 14.62 |
| 0.298 | 0.66 | 1.58   | Q9Q832                                      | DnaJ homolog subfamily B member 4                                            | Dnajp4      | 5049 | 6    | 5    | 5    | 28.8 | 25.2 | 25.2   | 37.781 | 0.0000 | 11.215  | 8238600  | 49    | 15.68 | 16.31 | 16.14 | 16.23 | 13.13 | 16.26 | 15.94 |
| 1.272 | 0.65 | 1.57   | Q8R2C0                                      | Mitochondrial ribosome maintenance complex-binding protein                   | Mcm3        | 3840 | 22   | 22   | 22   | 22.1 | 22.1 | 22.1   | 72.89  | 0.0000 | 28.163  | 3691800  | 45    | 14.72 | 13.89 | 14.28 | 13.68 | 13.69 | 13.49 | 14.68 |
| 2.221 | 0.65 | 1.57   | Q9BN81                                      | Acetyl-coenzyme A synthetase 2-like, mitochondrial                           | Acs1        | 4495 | 8    | 8    | 8    | 17   | 17   | 17     | 74.622 | 0.0000 | 56.464  | 6917400  | 112   | 14.56 | 14.32 | 14.47 | 13.52 | 13.86 | 13.74 | 14.05 |
| 1.401 | 0.65 | 1.57   | Q9B857                                      | Platelet glycoprotein 4                                                      | Cd36        | 1767 | 10   | 10   | 10   | 17.8 | 17.8 | 17.8   | 52.697 | 0.0000 | 69.66   | 28927000 | 153   | 17.85 | 17.79 | 17.75 | 16.69 | 17.56 | 17.37 | 16.94 |
| 2.408 | 0.65 | 1.57   | Q9BWC7                                      | Arf-GAP domain and FG repeat-containing protein 2                            | Afg2        | 2860 | 7    | 5    | 5    | 5    | 17.7 | 17.7   | 48.967 | 0.0000 | 34.835  | 10943000 | 109   | 15.36 | 15.59 | 15.51 | 15.10 | 14.85 | 14.71 | 14.67 |
| 3.4   |      |        |                                             |                                                                              |             |      |      |      |      |      |      |        |        |        |         |          |       |       |       |       |       |       |       |       |

|       |      |      |         |                                                                                 |                |      |    |    |      |      |        |        |        |         |         |           |       |       |       |       |       |       |       |       |
|-------|------|------|---------|---------------------------------------------------------------------------------|----------------|------|----|----|------|------|--------|--------|--------|---------|---------|-----------|-------|-------|-------|-------|-------|-------|-------|-------|
| 0.209 | 0.61 | 1.53 | Q9D657  | Ribosome-recycling factor, mitochondrial                                        | Mrf1           | 5008 | 8  | 8  | 8    | 46.2 | 46.2   | 46.2   | 29.05  | 0.0000  | 183.98  | 12519000  | 103   | 15.09 | 15.90 | 15.36 | 17.02 | 12.43 | 15.40 | 14.51 |
| 0.684 | 0.61 | 1.53 | Q70572  | Sphingomyelin phosphodiesterase 2                                               | Smpd2          | 514  | 7  | 7  | 7    | 22   | 22     | 22     | 47.466 | 0.0000  | 16.442  | 4560400   | 34    | 14.85 | 13.68 | 13.95 | 13.19 | 14.25 | 13.58 | 13.18 |
| 0.750 | 0.61 | 1.53 | Q7TS08  | Pyruvate dehydrogenase phosphatase regulatory subunit, mitochondrial            | Pdp1           | 2787 | 10 | 10 | 10   | 16.1 | 16.1   | 16.1   | 99.229 | 0.0000  | 57.062  | 5787900   | 51    | 14.58 | 13.55 | 14.66 | 13.34 | 14.12 | 13.90 | 13.26 |
| 0.706 | 0.61 | 1.52 | Q8BUV9  | Geranyl/geranyl transferase type-1 subunit beta                                 | Pgg11b         | 3233 | 6  | 6  | 5    | 21.8 | 21.8   | 16.2   | 42.354 | 0.0000  | 29.669  | 7461500   | 57    | 13.83 | 13.96 | 14.24 | 13.98 | 13.80 | 13.33 | 12.49 |
| 0.425 | 0.61 | 1.52 | Q8K2Y9  | Central cavemalin malformations protein 2 homolog                               | Cav2           | 3671 | 12 | 12 | 12   | 12.4 | 12.4   | 12.4   | 49.917 | 0.0000  | 6.6034  | 19002000  | 29    | 13.50 | 13.75 | 13.68 | 13.47 | 13.50 | 13.52 | 13.52 |
| 0.411 | 0.61 | 1.52 | Q8CY66  | HIACA ribonucleoprotein complex subunit 1                                       | Gari1          | 4789 | 2  | 2  | 2    | 9.5  | 9.5    | 9.5    | 23.474 | 0.0004  | 4.9343  | 5165100   | 45    | 14.36 | 14.71 | 15.19 | 13.42 | 15.65 | 13.51 | 14.00 |
| 0.367 | 0.61 | 1.52 | Q4KML4  | Costars family protein ABRACL                                                   | Abrac1         | 2061 | 3  | 3  | 3    | 46.9 | 46.9   | 46.9   | 9.0303 | 0.0000  | 29.25   | 6622700   | 76    | 15.89 | 16.10 | 15.87 | 13.86 | 16.40 | 14.91 | 16.21 |
| 1.164 | 0.60 | 1.52 | Q9CQW2  | ADP-ribosylation factor-like protein 8B                                         | Arf1b          | 4643 | 10 | 10 | 5    | 55.9 | 55.9   | 23.7   | 21.539 | 0.0000  | 122.51  | 91601000  | 270   | 18.75 | 18.36 | 18.46 | 18.52 | 17.60 | 17.79 | 17.76 |
| 0.425 | 0.60 | 1.52 | P39888  | Tyrosine-protein kinase Fyn                                                     | Fyn            | 1054 | 7  | 6  | 3    | 15.3 | 15.3   | 8.4    | 60.674 | 0.0000  | 35.352  | 18855000  | 96    | 17.54 | 17.11 | 17.11 | 15.15 | 16.80 | 17.33 | 17.33 |
| 0.555 | 0.60 | 1.51 | Q8Q9K1  | Myeloid leukemia factor 2                                                       | Mlf2           | 4395 | 4  | 4  | 4    | 23.5 | 23.5   | 18.2   | 28.055 | 0.0000  | 7.1161  | 2014300   | 18    | 13.69 | 13.72 | 13.68 | 14.24 | 12.84 | 12.86 | 12.86 |
| 0.308 | 0.60 | 1.52 | Q9Z158  | GRB2-associated-binding protein 2                                               | Gab2           | 5821 | 7  | 7  | 6    | 17.3 | 17.3   | 15     | 73.207 | 0.0000  | 40.424  | 7242200   | 97    | 14.41 | 14.58 | 14.64 | 14.90 | 11.92 | 14.69 | 14.26 |
| 0.910 | 0.60 | 1.52 | Q8K274  | Ketosamine-3-kinase                                                             | Fnk3p          | 3647 | 6  | 6  | 26.9 | 26.9 | 34.468 | 0.0000 | 29.815 | 7143500 | 88      | 15.13     | 15.10 | 15.05 | 13.79 | 14.45 | 15.13 | 15.13 |       |       |
| 0.523 | 0.60 | 1.52 | Q8PDD8  | Vacuolar fusion protein MON1 homolog A                                          | Mon1a          | 2612 | 4  | 4  | 4    | 11.7 | 11.7   | 11.7   | 62.311 | 0.0000  | 33.898  | 2517100   | 33    | 13.83 | 13.81 | 13.94 | 13.16 | 12.06 | 14.02 | 13.80 |
| 2.154 | 0.60 | 1.52 | Q5S234  | Proteasome subunit beta type-5                                                  | Psm5b          | 466  | 12 | 12 | 4    | 47   | 47     | 47     | 28.532 | 0.0000  | 187.96  | 44091000  | 259   | 17.61 | 17.25 | 16.74 | 16.74 | 16.61 | 16.98 | 16.74 |
| 1.870 | 0.60 | 1.52 | P11688  | Integrin alpha-5/Integrin alpha-5 heavy chain/Integrin alpha-5 light chain      | Itpa5          | 749  | 16 | 16 | 16   | 18   | 18     | 18     | 115.04 | 0.0000  | 217.49  | 28433000  | 218   | 16.62 | 16.23 | 16.40 | 16.05 | 15.77 | 15.91 | 15.53 |
| 1.875 | 0.60 | 1.52 | Q9CQRE  | Serine/threonine-protein phosphatase 6 catalytic subunit/Serine/threonine-Ppp6c | Ppp6c          | 4626 | 15 | 15 | 15   | 60.3 | 60.3   | 60.3   | 35.159 | 0.0000  | 104.12  | 48077000  | 363   | 16.74 | 16.57 | 16.66 | 16.22 | 15.70 | 16.27 | 16.03 |
| 0.204 | 0.60 | 1.52 | Q79K45  | DNA-directed RNA polymerase I subunit RPA34                                     | Cd3sep         | 2717 | 8  | 8  | 8    | 32.3 | 32.3   | 32.3   | 43.082 | 0.0000  | 32.675  | 6943900   | 62    | 13.41 | 15.39 | 13.31 | 15.24 | 11.38 | 12.82 | 14.30 |
| 0.454 | 0.60 | 1.51 | Q8ZPR5  | Sphingomyelin phosphodiesterase 4                                               | Smpd4          | 2650 | 6  | 6  | 6    | 10.4 | 10.4   | 10.4   | 93.275 | 0.0000  | 27.803  | 8776000   | 49    | 16.08 | 15.14 | 15.98 | 15.57 | 15.47 | 15.54 | 13.77 |
| 2.655 | 0.60 | 1.51 | P14901  | Heme oxygenase 1                                                                | Hmoa1          | 788  | 22 | 22 | 22   | 70.6 | 70.6   | 70.6   | 32.928 | 0.0000  | 192.86  | 128520000 | 472   | 18.60 | 18.49 | 18.56 | 18.20 | 17.92 | 17.84 | 17.55 |
| 0.635 | 0.60 | 1.51 | Q9D821  | Activating signal co-receptor 1 complex subunit 1                               | Ascc1          | 5086 | 5  | 5  | 5    | 17.4 | 17.4   | 17.4   | 41.279 | 0.0009  | 3.9257  | 4674100   | 17    | 15.06 | 15.24 | 15.03 | 15.04 | 14.05 | 15.24 | 13.74 |
| 1.782 | 0.60 | 1.51 | Q91YP2  | Neurolysin, mitochondrial                                                       | Nin            | 422  | 24 | 24 | 24   | 42.2 | 42.2   | 42.2   | 40.229 | 0.0000  | 134     | 44886000  | 306   | 16.62 | 16.55 | 16.41 | 16.20 | 15.69 | 16.08 | 15.85 |
| 0.725 | 0.59 | 1.51 | Q98L53  | Phosphoserine phosphatase                                                       | Psp1           | 4445 | 11 | 11 | 11   | 54.7 | 54.7   | 54.7   | 25.098 | 0.0000  | 19.508  | 12852000  | 113   | 15.10 | 15.10 | 15.01 | 15.09 | 13.60 | 14.69 | 15.12 |
| 0.585 | 0.59 | 1.51 | Q8YCH6  | Delta(24)-sterol reductase                                                      | Dhcr24         | 3921 | 14 | 14 | 14   | 24.4 | 24.4   | 24.4   | 60.112 | 0.0000  | 42.376  | 10752000  | 75    | 13.75 | 14.92 | 14.94 | 14.13 | 14.65 | 13.49 | 13.40 |
| 0.509 | 0.59 | 1.51 | Q8CF89  | TGF-beta-activated kinase 1 and MAP3K7-binding protein 1                        | Tak1           | 3476 | 7  | 7  | 7    | 21.1 | 21.1   | 21.1   | 54.616 | 0.0000  | 7.6827  | 3301400   | 23    | 13.87 | 14.18 | 14.50 | 14.36 | 13.38 | 14.15 | 12.48 |
| 0.973 | 0.59 | 1.51 | P22366  | Myeloid differentiation primary response protein MyD88                          | MyD88          | 873  | 12 | 12 | 12   | 46.3 | 46.3   | 46.3   | 33.753 | 0.0000  | 40.034  | 13271000  | 143   | 15.39 | 15.05 | 15.24 | 15.04 | 15.31 | 14.52 | 14.14 |
| 2.495 | 0.59 | 1.51 | Q9CWI9  | Nucleoporin Nup37                                                               | Nup37          | 4733 | 5  | 5  | 5    | 23   | 23     | 23     | 36.731 | 0.0000  | 17.644  | 3837000   | 35    | 14.47 | 14.77 | 14.47 | 13.86 | 14.46 | 14.25 | 14.02 |
| 0.651 | 0.59 | 1.51 | Q5O591  | Protein INPACT                                                                  | Protein INPACT | 442  | 5  | 5  | 5    | 19.8 | 19.8   | 19.8   | 36.276 | 0.0000  | 22.39   | 3519600   | 48    | 14.04 | 14.04 | 13.13 | 13.50 | 15.01 | 12.87 | 12.87 |
| 0.452 | 0.59 | 1.51 | Q9Z1C5  | Protein bicucullin D homolog 2                                                  | Bicd2          | 4217 | 8  | 8  | 8    | 12.8 | 12.8   | 12.8   | 93.39  | 0.0000  | 42.957  | 7765000   | 89    | 14.97 | 15.36 | 15.07 | 15.58 | 13.35 | 15.00 | 14.24 |
| 1.993 | 0.59 | 1.51 | Q60737  | Casein kinase II subunit alpha                                                  | Cank2a1        | 2199 | 18 | 18 | 18   | 53.7 | 53.7   | 53.7   | 45.133 | 0.0000  | 323.31  | 81820000  | 501   | 17.00 | 16.89 | 16.96 | 16.33 | 16.03 | 16.62 | 16.45 |
| 1.619 | 0.59 | 1.51 | P91731  | Proteasome activator complex subunit 2                                          | Pame1          | 1636 | 21 | 20 | 20   | 72.3 | 67.9   | 67.9   | 28.673 | 0.0000  | 193.22  | 53621000  | 446   | 16.73 | 16.70 | 16.73 | 16.37 | 15.68 | 16.13 | 16.32 |
| 0.438 | 0.59 | 1.51 | Q9JPU0  | Myeloid-activated protein kinase kinase kinase kinase 3                         | Map3k4         | 934  | 4  | 4  | 4    | 9.1  | 9.1    | 9.1    | 101.12 | 0.0000  | 31.831  | 2743300   | 35    | 13.14 | 12.73 | 14.84 | 12.73 | 13.63 | 15.03 | 15.03 |
| 1.034 | 0.59 | 1.50 | Q9Z424  | Ceramide synthase 2                                                             | Cers2          | 4303 | 7  | 7  | 7    | 7.2  | 7.2    | 7.2    | 12.4   | 0.0000  | 76.887  | 14378000  | 168   | 15.54 | 15.43 | 15.81 | 15.78 | 13.03 | 15.60 | 15.60 |
| 0.553 | 0.59 | 1.50 | Q8BW96  | Calcium/calmodulin-dependent protein kinase type 1D                             | Cank1d         | 3256 | 9  | 7  | 7    | 24.2 | 19     | 19     | 42.918 | 0.0000  | 29.237  | 4642200   | 63    | 14.47 | 14.20 | 14.46 | 14.48 | 14.45 | 13.38 | 12.84 |
| 0.352 | 0.59 | 1.50 | Q8CFD4  | Sorcin nexin-8                                                                  | Snx8           | 3480 | 13 | 13 | 13   | 36.6 | 36.6   | 36.6   | 52.058 | 0.0000  | 109.677 | 16850000  | 133   | 15.46 | 14.92 | 14.93 | 15.21 | 12.92 | 14.39 | 15.55 |
| 3.705 | 0.59 | 1.50 | Q9R0R5  | Signal peptidase complex catalytic subunit SEC11A                               | Sec11a         | 9321 | 11 | 11 | 11   | 35.2 | 35.2   | 35.2   | 20.626 | 0.0000  | 77.805  | 64196000  | 405   | 17.79 | 17.65 | 17.49 | 17.05 | 14.58 | 14.68 | 14.58 |
| 0.520 | 0.59 | 1.50 | Q8K245  | Calreticulin                                                                    | Uvrug          | 3644 | 9  | 9  | 9    | 14.6 | 14.6   | 14.6   | 77.524 | 0.0000  | 15.236  | 4732400   | 52    | 14.54 | 13.94 | 14.44 | 14.10 | 14.11 | 14.18 | 12.49 |
| 0.313 | 0.59 | 1.50 | Q90000  | Nuclear receptor coactivator 3                                                  | Ncoa3          | 315  | 6  | 6  | 6    | 6.8  | 6.8    | 6.8    | 15.54  | 0.0000  | 35.541  | 4911100   | 76    | 14.38 | 14.30 | 14.68 | 14.82 | 14.20 | 11.95 | 14.51 |
| 0.940 | 0.58 | 1.50 | Q9AKJ23 | Proteasome assembly chaperone 1                                                 | Pamg1          | 5442 | 12 | 12 | 12   | 43.6 | 43.6   | 43.6   | 33.104 | 0.0000  | 51.135  | 19620000  | 166   | 15.44 | 15.47 | 15.60 | 15.31 | 15.33 | 14.79 | 14.25 |
| 0.248 | 0.58 | 1.50 | Q80H47  | Protein domain phosphoinositide-interacting protein 2                           | PIP2i          | 484  | 14 | 14 | 14   | 19.8 | 19.8   | 19.8   | 49.777 | 0.0000  | 43.718  | 14.465    | 30    | 14.55 | 14.87 | 15.48 | 14.55 | 12.33 | 14.33 | 14.33 |
| 1.691 | 0.58 | 1.50 | Q91405  | Protein transport protein Sec23a                                                | Sec23a         | 529  | 26 | 26 | 26   | 56.6 | 56.6   | 56.6   | 86.161 | 0.0000  | 323.31  | 49539000  | 398   | 17.02 | 16.72 | 16.87 | 16.45 | 16.57 | 15.99 | 16.14 |
| 1.268 | 0.58 | 1.50 | Q8K268  | ATP-binding cassette sub-family F member 3                                      | Abcf3          | 3645 | 14 | 14 | 14   | 30.7 | 30.7   | 30.7   | 79.864 | 0.0000  | 83.039  | 16371000  | 166   | 16.17 | 15.80 | 15.94 | 15.61 | 14.85 | 15.47 | 15.61 |
| 1.850 | 0.58 | 1.50 | Q5A692  | Centromere/kinetochore protein zw10 homolog                                     | Zw10           | 417  | 17 | 17 | 16   | 28.8 | 28.8   | 28.8   | 88.062 | 0.0000  | 156.02  | 14136000  | 172   | 15.81 | 15.31 | 15.34 | 14.80 | 14.92 | 15.09 | 14.81 |
| 0.322 | 0.58 | 1.50 | Q70551  | SRF5 protein kinase 1                                                           | Srk1           | 512  | 7  | 5  | 5    | 12.8 | 10.5   | 10.5   | 73.088 | 0.0008  | 41.129  | 1921400   | 24    | 13.58 | 14.35 | 13.70 | 14.60 | 12.53 | 12.24 | 13.81 |
| 2.044 | 0.58 | 1.50 | P35275  | Ras-related protein Rab-33D                                                     | Rab33d         | 301  | 15 | 15 | 15   | 33.8 | 33.8   | 33.8   | 24.416 | 0.0000  | 21.681  | 9062200   | 74    | 14.04 | 13.98 | 15.68 | 15.42 | 15.46 | 15.28 | 15.28 |
| 0.727 | 0.58 | 1.49 | Q6P069  | Sorcin                                                                          | Sri            | 2551 | 14 | 14 | 14   | 63.1 | 63.1   | 63.1   | 21.627 | 0.0000  | 104.54  | 58905000  | 224   | 17.57 | 18.24 | 18.17 | 16.76 | 17.73 | 17.15 | 18.03 |
| 1.780 | 0.58 | 1.49 | P56135  | ATP synthase subunit f, mitochondrial                                           | Atf52          | 1275 | 7  | 7  | 7    | 53.4 | 53.4   | 53.4   | 10.344 | 0.0000  | 20.357  | 10558000  | 203   | 19.13 | 18.70 | 18.90 | 18.28 | 18.20 | 18.64 | 18.19 |
| 0.894 | 0.58 | 1.49 | P36552  | Oxygen-dependent coproporphyrinogen-III oxidase, mitochondrial                  | Cpox           | 1043 | 13 | 13 | 13   | 35.4 | 35.4   | 35.4   | 49.714 | 0.0000  | 43.683  | 13988000  | 140   | 14.75 | 14.86 | 14.83 | 14.56 | 13.44 | 14.51 | 14.03 |
| 2.632 | 0.58 | 1.49 | P29785  | Oxidative aminotransferase, mitochondrial                                       | Oat1           | 976  | 24 | 24 | 24   | 78.6 | 78.6   | 78.6   | 48.354 | 0.0000  | 31.311  | 15575000  | 771   | 18.05 | 17.53 | 17.33 | 17.28 | 17.25 | 17.46 | 17.58 |
| 1.683 | 0.58 | 1.49 | Q8UJ08  | SH3 domain-binding glutamic acid-rich-like protein                              | Sh3bgr1        | 5436 | 6  | 6  | 6    | 59.6 | 59.6   | 59.6   | 12.811 | 0.0000  | 137.49  | 17259000  | 183   | 15.81 | 16.43 | 16.25 | 15.55 | 15.70 | 15.46 | 15.69 |
| 1.350 | 0.58 | 1.49 | Q9EP89  | Serine beta-lactamase-like protein LACTB, mitochondrial                         | Lactb          | 5247 | 20 | 20 | 20   | 40.1 | 40.1   | 40.1   | 60.705 | 0.0000  | 154.38  | 34815000  | 348   | 16.36 | 15.96 | 15.95 | 15.53 | 15.09 | 15.84 | 15.59 |
| 1.725 | 0.58 | 1.49 | P24527  | Leukotriene A-4 hydrolase                                                       | Lta4h          | 898  | 42 | 42 | 42   | 74.1 | 74.1   | 74.1   | 69.05  | 0.0000  | 323.31  | 204930000 | 926   | 18.21 | 17.98 |       |       |       |       |       |

|       |      |      |        |                                                              |           |      |      |      |      |        |       |        |         |        |          |           |       |       |       |       |       |       |       |       |
|-------|------|------|--------|--------------------------------------------------------------|-----------|------|------|------|------|--------|-------|--------|---------|--------|----------|-----------|-------|-------|-------|-------|-------|-------|-------|-------|
| 0.373 | 0.55 | 1.46 | Q99KR6 | E3 ubiquitin-protein ligase RNF34                            | Rnf34     | 4391 | 6    | 6    | 6    | 23.7   | 23.7  | 23.7   | 42.03   | 0.0000 | 19.865   | 2581900   | 22    | 13.60 | 13.91 | 14.00 | 14.63 | 13.62 | 12.51 | 12.41 |
| 1.523 | 0.55 | 1.46 | O35250 | Exocyst complex component 7                                  | Exoc7     | 351  | 35   | 35   | 35   | 61.1   | 61.1  | 61.1   | 79.959  | 0.0000 | 204.76   | 41200000  | 466   | 15.78 | 15.41 | 15.35 | 15.22 | 14.73 | 15.13 | 14.80 |
| 0.489 | 0.55 | 1.46 | Q9DC63 | F-box only protein 3                                         | Fbxo3     | 5198 | 55   | 55   | 55   | 14.2   | 14.2  | 14.2   | 55.227  | 0.0000 | 10.198   | 4303400   | 25    | 14.99 | 14.60 | 14.03 | 14.63 | 13.51 | 13.20 | 14.64 |
| 1.330 | 0.55 | 1.46 | O89079 | Coatomer subunit epsilon                                     | Cope      | 600  | 19   | 19   | 19   | 70.7   | 60.7  | 60.7   | 34.567  | 0.0000 | 20.738   | 76489000  | 460   | 17.38 | 17.44 | 17.59 | 17.08 | 16.41 | 17.05 | 17.15 |
| 0.413 | 0.54 | 1.46 | Q9D224 | Sim58                                                        | Sim58     | 495  | 15   | 15   | 15   | 15.8   | 15.8  | 15.8   | 25.057  | 0.0000 | 9.0594   | 2186700   | 146   | 14.33 | 14.33 | 14.33 | 14.44 | 14.31 | 14.75 | 13.98 |
| 2.200 | 0.54 | 1.46 | P06745 | Glucose-6-phosphate isomerase                                | Gpi       | 661  | 47   | 47   | 37   | 71.1   | 61.1  | 58.8   | 62.566  | 0.0000 | 323.31   | 118820000 | 2285  | 20.31 | 20.08 | 20.41 | 19.54 | 19.88 | 19.58 | 19.50 |
| 1.174 | 0.54 | 1.46 | O89103 | Complement component C1q receptor                            | Cd93      | 603  | 6    | 6    | 6    | 10.7   | 10.7  | 10.7   | 69.354  | 0.0000 | 23.12    | 6009400   | 77    | 15.22 | 15.06 | 14.82 | 14.48 | 14.02 | 14.88 | 14.60 |
| 0.595 | 0.54 | 1.46 | O8BIQ5 | Cleavage stimulation factor subunit 2                        | Cstf2     | 3064 | 6    | 6    | 6    | 23.1   | 23.1  | 12.4   | 61.341  | 0.0000 | 36.868   | 3296600   | 42    | 13.39 | 13.93 | 14.14 | 13.89 | 12.56 | 12.93 | 13.73 |
| 3.427 | 0.54 | 1.45 | O8CZ71 | Eukaryotic translation initiation factor 3 subunit L         | Elf3      | 3738 | 37   | 37   | 36   | 63.5   | 63.5  | 63.5   | 66.612  | 0.0000 | 323.31   | 165050000 | 847   | 17.75 | 17.57 | 17.62 | 17.12 | 17.04 | 17.22 | 17.06 |
| 1.722 | 0.54 | 1.45 | P05213 | Tubulin alpha-1B chain                                       | Tuba1b    | 659  | 36   | 36   | 0    | 72.7   | 72.7  | 0      | 50.151  | 0.0000 | 323.31   | 278150000 | 3438  | 22.41 | 22.34 | 22.18 | 21.89 | 22.18 | 21.99 | 21.60 |
| 1.346 | 0.54 | 1.45 | P10649 | Glutathione S-transferase Mu 1                               | Gstm1     | 727  | 39   | 39   | 25   | 91.1   | 52.8  | 25.9   | 25.97   | 0.0000 | 323.31   | 200940000 | 2223  | 21.35 | 21.88 | 21.56 | 20.68 | 21.31 | 21.08 | 21.16 |
| 0.454 | 0.54 | 1.45 | Q9CYW8 | DNA replication complex GINS protein PSF3                    | Gins3     | 4791 | 4    | 4    | 4    | 26.9   | 26.9  | 26.9   | 24.576  | 0.0000 | 17.542   | 2487100   | 39    | 13.81 | 13.91 | 14.33 | 13.89 | 12.21 | 14.12 | 13.69 |
| 0.291 | 0.54 | 1.45 | P13808 | Anion exchange protein 2                                     | Sic4a2    | 769  | 8    | 8    | 8    | 10.3   | 10.3  | 10.3   | 136.81  | 0.0000 | 36.311   | 8780200   | 72    | 14.87 | 15.50 | 14.91 | 13.36 | 13.61 | 15.91 | 15.34 |
| 4.516 | 0.54 | 1.45 | P14824 | Annexin A6                                                   | Anxa6     | 786  | 7    | 7    | 7    | 86.2   | 85.9  | 75.894 | 86.2    | 0.0000 | 323.31   | 821550000 | 2603  | 19.34 | 19.25 | 19.24 | 18.78 | 18.73 | 18.68 | 18.75 |
| 0.389 | 0.54 | 1.45 | Q6NZM9 | Histone deacetylase 4                                        | Hdac4     | 2547 | 10   | 10   | 9    | 13.8   | 13.8  | 13.2   | 118.56  | 0.0000 | 27.361   | 5763100   | 48    | 13.92 | 14.46 | 15.04 | 12.71 | 14.55 | 13.80 | 14.67 |
| 1.888 | 0.54 | 1.45 | P37040 | NAD(PH)-cytochrome P450 reductase                            | Por       | 1046 | 55   | 55   | 55   | 73.3   | 73.3  | 73.3   | 77.043  | 0.0000 | 323.31   | 517180000 | 1608  | 19.24 | 19.10 | 19.14 | 18.57 | 18.32 | 18.85 | 18.78 |
| 0.589 | 0.54 | 1.45 | Q91Y42 | Sorting nexin-4                                              | Snx4      | 4161 | 21   | 21   | 21   | 45.3   | 45.3  | 45.3   | 51.777  | 0.0000 | 149.75   | 42073000  | 401   | 16.10 | 15.78 | 16.02 | 15.83 | 14.42 | 15.95 | 15.50 |
| 1.377 | 0.54 | 1.45 | Q9D670 | Receptor expression-enhancing protein 5                      | Reep5     | 2217 | 11   | 11   | 11   | 27     | 21.95 | 21.95  | 21.95   | 0.0000 | 240      | 11312000  | 507   | 15.05 | 15.66 | 17.87 | 17.49 | 16.96 | 17.40 | 17.21 |
| 0.641 | 0.54 | 1.45 | AK3GB4 | TBC1 domain family member 8B                                 | Tbcl8b    | 51   | 10   | 10   | 9    | 14.7   | 14.7  | 13.7   | 127.89  | 0.0000 | 44.41    | 6949100   | 90    | 14.41 | 14.16 | 14.60 | 14.41 | 12.93 | 14.02 | 14.04 |
| 0.646 | 0.54 | 1.45 | Q8CIG2 | BAG family molecular chaperone regulator 5                   | Bag5      | 3538 | 4    | 4    | 4    | 13.9   | 13.9  | 13.9   | 50.942  | 0.0000 | 19.078   | 4581100   | 76    | 14.01 | 14.81 | 15.17 | 14.29 | 14.42 | 14.32 | 13.46 |
| 1.943 | 0.54 | 1.45 | O8QX50 | Ubiquitin-associated protein 2-like                          | Uba2p2    | 2870 | 23   | 23   | 23   | 29.9   | 29.9  | 29.9   | 116.8   | 0.0000 | 30.115   | 37911000  | 412   | 16.50 | 16.78 | 16.59 | 16.32 | 15.84 | 16.14 | 16.04 |
| 0.702 | 0.54 | 1.45 | Q9DF77 | Nuclear receptor coactivator 7                               | Ncoar7    | 2554 | 4    | 4    | 4    | 6.6    | 6.6   | 106.36 | 0.0000  | 6.3131 | 2807400  | 22        | 14.14 | 14.15 | 14.14 | 13.79 | 13.52 | 12.93 | 14.30 |       |
| 2.243 | 0.54 | 1.45 | Q8BNJ0 | Armadillo repeat-containing protein 6                        | Arm6      | 3155 | 8    | 8    | 8    | 29.7   | 29.7  | 29.7   | 50.683  | 0.0000 | 67.483   | 12470000  | 132   | 15.70 | 15.32 | 15.56 | 14.85 | 15.03 | 14.97 | 15.13 |
| 2.035 | 0.53 | 1.45 | Q9Z2U0 | Proteasome subunit alpha type-7                              | Psm7      | 5864 | 23   | 23   | 23   | 70.6   | 70.6  | 70.6   | 27.855  | 0.0000 | 323.31   | 22674000  | 663   | 18.85 | 18.84 | 19.05 | 18.16 | 18.60 | 18.28 | 18.48 |
| 1.733 | 0.53 | 1.45 | P54818 | Galactocerebrosidase                                         | Galc      | 1259 | 7    | 7    | 7    | 15.2   | 15.2  | 15.2   | 77.256  | 0.0000 | 57.317   | 18472000  | 155   | 16.85 | 16.73 | 16.56 | 16.91 | 16.14 | 15.53 | 16.13 |
| 0.689 | 0.53 | 1.45 | O3JUND | Src kinase-associated phosphoprotein 2                       | Skap2     | 1820 | 18   | 18   | 18   | 52     | 52    | 40.712 | 0.0000  | 174.96 | 59841000 | 325       | 14.74 | 17.02 | 16.89 | 16.40 | 16.44 | 16.29 | 16.97 |       |
| 2.128 | 0.53 | 1.44 | Q9DBW5 | 26S proteasome non-ATPase regulatory subunit 12              | Rps28     | 5079 | 32   | 32   | 34   | 76.1   | 76.1  | 73.7   | 52.8952 | 0.0000 | 323.31   | 194580000 | 829   | 17.83 | 17.49 | 17.68 | 17.20 | 16.78 | 17.09 | 17.08 |
| 0.870 | 0.53 | 1.45 | Q9CWY8 | Ribonuclease H2 subunit A                                    | Rnash2a   | 4739 | 6    | 6    | 6    | 32.9   | 32.9  | 32.9   | 33.512  | 0.0000 | 20.558   | 8002800   | 93    | 15.08 | 15.04 | 15.37 | 14.59 | 14.39 | 14.22 | 15.32 |
| 0.526 | 0.53 | 1.45 | Q91YN0 | Protein C12orf4 homolog                                      | D6Wsu163a | 4167 | 8    | 8    | 8    | 23.7   | 23.7  | 63.643 | 0.0000  | 25.24  | 2463800  | 26        | 13.86 | 13.83 | 14.64 | 13.23 | 14.59 | 13.24 | 13.25 |       |
| 0.598 | 0.53 | 1.44 | Q91Y58 | Calcium/calmodulin-dependent protein kinase type 1           | Camk1     | 4277 | 11   | 11   | 9    | 44.4   | 44.4  | 39     | 41.624  | 0.0000 | 57.48    | 7852900   | 106   | 15.14 | 15.56 | 15.16 | 14.75 | 15.69 | 14.42 | 14.16 |
| 0.821 | 0.53 | 1.44 | Q9BLC8 | Translation initiation factor eIF-2B subunit alpha           | EIF2b1    | 4415 | 31.5 | 31.5 | 31.5 | 31.5   | 31.5  | 31.5   | 31.5    | 0.0000 | 27.891   | 8740100   | 70    | 14.93 | 15.28 | 15.07 | 15.28 | 15.15 | 14.93 | 15.06 |
| 0.731 | 0.53 | 1.44 | Q9Z2R1 | UPF0183 protein C16orf70 homolog                             | Upf1      | 4174 | 4    | 4    | 4    | 16.4   | 16.4  | 14.47  | 47.416  | 0.0000 | 14.457   | 2724500   | 35    | 14.25 | 14.15 | 14.23 | 13.51 | 13.01 | 13.83 | 14.39 |
| 2.525 | 0.53 | 1.44 | P53994 | Ras-related protein Rab-2A                                   | Rab2a     | 1243 | 18   | 18   | 12   | 75.5   | 40.2  | 47.2   | 23.547  | 0.0000 | 272.83   | 139990000 | 455   | 18.81 | 18.59 | 18.56 | 17.96 | 18.24 | 18.12 | 18.18 |
| 0.254 | 0.53 | 1.44 | Q8BW00 | Probable peptidyl-tRNA hydrolase                             | Prhr1     | 3252 | 5    | 5    | 5    | 40.2   | 40.2  | 40.2   | 22.16   | 0.0000 | 40.077   | 6882900   | 37    | 15.63 | 15.53 | 16.60 | 16.04 | 13.40 | 16.00 | 16.14 |
| 3.407 | 0.53 | 1.44 | Q8VEU6 | Adenosine deaminase                                          | Adad      | 3985 | 16.5 | 16.5 | 16.5 | 38.737 | 16.5  | 38.737 | 7.4402  | 0.0000 | 7.4402   | 7225900   | 62    | 14.98 | 15.40 | 15.68 | 15.40 | 15.40 | 15.68 | 15.68 |
| 0.876 | 0.53 | 1.44 | Q9PE01 | U5 small nuclear ribonucleoprotein 40 kDa protein            | Snmp40    | 2622 | 13   | 13   | 13   | 57.3   | 57.3  | 57.3   | 39.275  | 0.0000 | 318.87   | 2689000   | 236   | 16.26 | 15.51 | 16.05 | 15.80 | 15.57 | 15.38 | 14.90 |
| 1.265 | 0.53 | 1.44 | Q8BX21 | Protein disulfide-isomerase Tmx3                             | Tmx3      | 3291 | 11   | 11   | 11   | 23.5   | 23.5  | 51.847 | 0.0000  | 42.849 | 46545000 | 153       | 17.32 | 16.84 | 17.12 | 16.75 | 16.31 | 16.89 | 16.33 |       |
| 1.631 | 0.53 | 1.44 | P09581 | Macrophage colony-stimulating factor 1 receptor              | Csf1r     | 6999 | 26   | 26   | 26   | 25.1   | 25.1  | 109.18 | 0.0000  | 266.35 | 13783000 | 532       | 18.78 | 18.49 | 18.63 | 18.33 | 17.84 | 18.27 | 18.00 |       |
| 2.536 | 0.53 | 1.44 | Q9DCM1 | 60.208kD protein 75 kDa mitochondrial                        | Trap1     | 4614 | 34   | 34   | 34   | 56.7   | 56.7  | 56.7   | 29.788  | 0.0000 | 323.31   | 142070000 | 980   | 17.88 | 17.68 | 17.68 | 17.88 | 17.68 | 17.68 | 17.68 |
| 0.799 | 0.52 | 1.44 | Q9DBZ5 | Eukaryotic translation initiation factor 3 subunit K         | Elf3k     | 5185 | 10   | 10   | 10   | 50.5   | 50.5  | 50.5   | 25.086  | 0.0000 | 63.039   | 49424000  | 228   | 17.57 | 17.66 | 17.11 | 17.11 | 16.12 | 17.02 | 17.42 |
| 0.223 | 0.52 | 1.44 | P62774 | Myotrophin                                                   | Mtpn      | 1444 | 6    | 6    | 6    | 68.6   | 68.6  | 68.6   | 12.861  | 0.0000 | 198.68   | 2478900   | 233   | 16.33 | 17.06 | 16.85 | 17.32 | 13.96 | 16.53 | 17.08 |
| 0.435 | 0.52 | 1.44 | Q6PM47 | O-phosphoserine-1-tRNA (Sec) selenium transferase            | Sepsaca   | 2581 | 5    | 5    | 5    | 19.8   | 19.8  | 19.8   | 55.265  | 0.0000 | 31.756   | 4372300   | 52    | 14.57 | 14.12 | 14.13 | 14.42 | 12.59 | 14.41 | 13.99 |
| 1.388 | 0.52 | 1.44 | AG6H11 | Mitochondrial intermediate peptidase                         | Mpep      | 61   | 6    | 6    | 6    | 10.1   | 10.1  | 10.1   | 80.851  | 0.0000 | 19.92    | 6390800   | 53    | 15.30 | 13.85 | 15.31 | 14.11 | 15.09 | 14.55 | 13.44 |
| 0.351 | 0.52 | 1.44 | Q8B441 | Metaxin-2                                                    | Metaxn2   | 152  | 12   | 12   | 12   | 63.5   | 63.5  | 29.758 | 0.0000  | 323.31 | 25485000 | 162       | 14.86 | 16.78 | 16.68 | 16.78 | 16.78 | 16.68 | 16.68 |       |
| 0.820 | 0.52 | 1.44 | Q9R1L0 | Steroid-4-alpha-carboxylate 3-dehydrogenase, decarboxylating | Nsdhl     | 5651 | 18   | 18   | 18   | 57.5   | 57.5  | 40.685 | 0.0000  | 20.4   | 5427800  | 391       | 16.28 | 16.03 | 15.95 | 15.84 | 15.51 | 15.54 | 15.37 |       |
| 0.285 | 0.52 | 1.43 | P04040 | Catalase                                                     | CAT       | 335  | 8    | 6    | 6    | 36.6   | 15.7  | 15.7   | 59.755  | 0.0000 | 24.227   | 4222200   | 41    | 14.44 | 16.17 | 15.49 | 14.47 | 15.24 | 13.62 | 16.08 |
| 0.526 | 0.52 | 1.43 | Q8BM00 | F-box only protein 38                                        | Fbxo38    | 618  | 7    | 7    | 7    | 8.9    | 8.9   | 133.93 | 0.0000  | 22.409 | 5414100  | 42        | 14.24 | 14.20 | 14.69 | 14.29 | 14.20 | 12.78 | 14.16 |       |
| 0.919 | 0.52 | 1.43 | Q3J3R1 | Monofunctional C1-tetrahydrolate synthase, mitochondrial     | Mthfr1    | 205  | 34   | 34   | 34   | 47.2   | 47.2  | 105.73 | 0.0000  | 323.31 | 6615300  | 690       | 16.55 | 16.18 | 16.38 | 16.22 | 15.21 | 16.03 | 15.96 |       |
| 0.848 | 0.52 | 1.43 | P47934 | Carnitine O-acetyltransferase                                | Crat      | 1131 | 21   | 21   | 20   | 37.5   | 37.5  | 35.8   | 70.839  | 0.0000 | 10.8     | 3515800   | 306   | 15.93 | 15.85 | 15.74 | 15.75 | 14.61 | 15.54 | 15.39 |
| 2.362 | 0.52 | 1.43 | Q8VEH8 | Phosphate carrier protein, mitochondrial                     | Sic25a3   | 4015 | 22   | 22   | 22   | 54.1   | 54.1  | 39.632 | 0.0000  | 261.91 | 49000000 | 736       | 20.64 | 20.43 | 20.41 | 20.11 | 19.90 | 20.08 | 19.81 |       |
| 2.595 | 0.52 | 1.43 | P07356 | Annexin A2                                                   | Anxa2     | 670  | 63   | 63   | 63   | 63     | 94.1  | 94.1   | 38.676  | 0.0000 | 323.31   | 325220000 | 3618  | 21.37 | 21.15 | 21.35 | 20.89 | 20.75 | 20.85 | 20.62 |
| 0.379 | 0.52 | 1.43 | Q9RC28 | Zone matrix structural antigen 2                             | Sm2       | 3814 | 5    | 5    | 5    | 17.    |       |        |         |        |          |           |       |       |       |       |       |       |       |       |

|       |      |      |        |                                                            |           |      |    |    |    |      |      |      |        |          |        |           |      |       |       |       |       |       |       |       |
|-------|------|------|--------|------------------------------------------------------------|-----------|------|----|----|----|------|------|------|--------|----------|--------|-----------|------|-------|-------|-------|-------|-------|-------|-------|
| 2.940 | 0.49 | 1.41 | P11499 | Heat shock protein HSP 90-beta                             | Hsp90ab1  | 745  | 83 | 83 | 60 | 78.2 | 78.2 | 65.2 | 83.28  | 0.0000   | 323.31 | 171450000 | 3337 | 20.50 | 20.40 | 20.45 | 20.09 | 20.00 | 19.94 | 19.80 |
| 0.510 | 0.49 | 1.41 | P08207 | Protein S100-A10                                           | S100a10   | 681  | 8  | 8  | 8  | 67   | 67   | 67   | 11.186 | 0.0000   | 68.213 | 12753000  | 357  | 18.34 | 18.73 | 18.99 | 18.38 | 17.18 | 18.80 | 18.62 |
| 2.195 | 0.49 | 1.41 | P47811 | Mitogen-activated protein kinase 14                        | Mapk14    | 1126 | 21 | 21 | 21 | 80.6 | 80.6 | 80.6 | 41.287 | 0.0000   | 228.85 | 101210000 | 615  | 17.99 | 17.61 | 17.73 | 17.33 | 17.38 | 17.29 | 17.17 |
| 0.852 | 0.49 | 1.41 | Q50J78 | Mitrim, mitochondrial                                      | Ndufr2    | 2094 | 7  | 7  | 7  | 51.8 | 51.8 | 51.8 | 19.628 | 0.0000   | 94.014 | 9179900   | 118  | 15.40 | 15.14 | 15.36 | 14.17 | 14.77 | 15.10 | 15.19 |
| 1.126 | 0.49 | 1.40 | Q8C95  | Crysdal-like protein-related protein 11                    | Crysdal11 | 3546 | 26 | 26 | 26 | 40.2 | 40.2 | 40.2 | 62.81  | 0.0000   | 123.93 | 3735600   | 315  | 16.35 | 16.35 | 16.35 | 16.01 | 16.08 | 16.01 | 16.08 |
| 1.487 | 0.49 | 1.40 | Q8Q606 | Estradiol 17-beta-dehydrogenase 11                         | Hsd17b11  | 5268 | 14 | 14 | 14 | 55   | 55   | 55   | 33.68  | 0.0000   | 239.59 | 72657000  | 372  | 18.12 | 17.62 | 17.84 | 17.27 | 17.33 | 17.65 | 17.24 |
| 0.161 | 0.49 | 1.40 | Q5SX39 | Myosin-4                                                   | Myh4      | 2158 | 16 | 15 | 1  | 11.2 | 10.7 | 0.7  | 222.86 | 0.0000   | 31.098 | 6378100   | 39   | 12.97 | 13.38 | 15.91 | 15.36 | 13.54 | 13.68 | 11.81 |
| 0.711 | 0.49 | 1.40 | Q924C1 | Exportin-5                                                 | Xpo5      | 4291 | 13 | 13 | 13 | 17.1 | 17.1 | 17.1 | 136.97 | 0.0000   | 57.282 | 6515000   | 99   | 14.45 | 14.07 | 14.20 | 13.69 | 14.47 | 13.05 | 14.01 |
| 0.598 | 0.48 | 1.40 | P97814 | Proline-serine-threonine phosphatase-interacting protein 1 | Pitprip1  | 1675 | 17 | 17 | 17 | 32.5 | 32.5 | 32.5 | 47.59  | 0.0000   | 29.465 | 34811000  | 246  | 16.50 | 16.13 | 16.28 | 15.63 | 15.05 | 16.45 | 16.16 |
| 0.578 | 0.49 | 1.40 | Q8NVE8 | WD repeat-containing protein 44                            | Wdr44     | 2531 | 6  | 6  | 6  | 6.2  | 6.2  | 6.2  | 10.155 | 0.0000   | 6.8243 | 2953300   | 30   | 14.50 | 14.30 | 14.07 | 13.90 | 14.30 | 14.30 | 14.04 |
| 0.367 | 0.49 | 1.40 | Q35Z29 | Tyrosine-protein phosphatase non-receptor type 9           | Ptpn9     | 930  | 6  | 6  | 6  | 13.3 | 13.3 | 13.3 | 67.969 | 0.0000   | 15.443 | 6124000   | 57   | 14.82 | 14.26 | 13.63 | 12.75 | 13.57 | 13.95 | 14.73 |
| 1.272 | 0.48 | 1.40 | P47857 | ATP-dependent 6-phosphofructokinase, muscle type           | Pfkfb     | 1128 | 16 | 10 | 10 | 26.8 | 20.1 | 20.1 | 85.268 | 0.0000   | 76.001 | 7793800   | 98   | 15.18 | 14.52 | 14.64 | 14.21 | 14.48 | 14.14 | 14.35 |
| 0.350 | 0.48 | 1.40 | Q9BKW9 | T-cell immunomodulatory protein                            | Itg1      | 4398 | 2  | 2  | 2  | 6.1  | 6.1  | 6.1  | 67.484 | 0.0000   | 12.65  | 1858000   | 19   | 14.03 | 13.58 | 13.71 | 14.01 | 13.71 | 11.85 | 13.58 |
| 0.790 | 0.48 | 1.40 | Q8E556 | Trafficking protein particle complex subunit 4             | Trappo4   | 5329 | 5  | 5  | 4  | 22.4 | 22.4 | 21.9 | 24.385 | 0.0004   | 4.6663 | 6757600   | 40   | 15.48 | 14.82 | 15.37 | 14.18 | 14.78 | 14.83 | 15.16 |
| 1.079 | 0.48 | 1.40 | P04117 | Fatty acid-binding protein, adipocyte                      | Fabp4     | 636  | 10 | 10 | 10 | 68.9 | 68.9 | 68.9 | 14.65  | 0.0000   | 83.553 | 50391000  | 326  | 16.93 | 17.25 | 17.46 | 16.50 | 16.49 | 16.78 | 17.15 |
| 0.405 | 0.48 | 1.40 | Q8EQ02 | Protein YIPF5                                              | Yip5      | 5286 | 3  | 3  | 3  | 22.2 | 22.2 | 22.2 | 27.873 | 0.0000   | 96.637 | 9222900   | 81   | 15.79 | 15.88 | 16.11 | 15.94 | 14.16 | 15.86 | 15.82 |
| 2.230 | 0.48 | 1.40 | P28516 | 26S proteasome non-ATPase regulatory subunit 7             | Psm7      | 926  | 16 | 16 | 16 | 50.5 | 50.5 | 50.5 | 36.539 | 0.0000   | 285.93 | 63018000  | 353  | 18.05 | 17.82 | 18.02 | 17.65 | 17.42 | 17.53 | 17.32 |
| 0.329 | 0.48 | 1.40 | P0D0V1 | Ubiquitin-conjugating enzyme E2 G2                         | Ube2g2    | 714  | 27 | 16 | 5  | 34.5 | 14.4 | 14.4 | 46.977 | 0.0000   | 180.86 | 5377500   | 362  | 16.36 | 16.17 | 16.43 | 16.46 | 14.41 | 16.66 | 16.23 |
| 0.263 | 0.48 | 1.40 | P60695 | Ubiquitin-conjugating enzyme E2 G2                         | Ube2g2    | 1356 | 6  | 6  | 6  | 53.3 | 53.3 | 53.3 | 18.566 | 0.0000   | 70.447 | 14662000  | 106  | 16.14 | 16.63 | 17.02 | 15.69 | 17.58 | 16.45 | 14.74 |
| 1.156 | 0.48 | 1.40 | Q8DAW6 | U4U6 small nuclear ribonucleoprotein Prp4                  | Prp4      | 5114 | 20 | 20 | 20 | 44.7 | 44.7 | 44.7 | 58.369 | 0.0000   | 63.004 | 29572000  | 285  | 15.64 | 15.11 | 15.41 | 15.00 | 14.50 | 15.13 | 14.99 |
| 0.414 | 0.48 | 1.40 | Q61301 | Catenin alpha-2                                            | Ctnna2    | 2289 | 4  | 2  | 2  | 7    | 3.4  | 3.4  | 106.28 | 0.0000   | 9.626  | 2942300   | 33   | 13.22 | 13.84 | 14.11 | 13.65 | 12.18 | 13.93 | 13.22 |
| 0.785 | 0.48 | 1.39 | Q8K4X7 | 1-acyl-sn-glycerol-3-phosphate acyltransferase delta       | Agpat4    | 3729 | 11 | 11 | 11 | 24.9 | 24.9 | 24.9 | 43.81  | 0.0000   | 26.729 | 11661000  | 97   | 14.75 | 15.16 | 15.42 | 14.80 | 15.10 | 15.33 | 14.23 |
| 0.186 | 0.48 | 1.39 | Q80866 | Phosphotriesterase-related protein                         | Pter      | 2216 | 6  | 6  | 6  | 25.5 | 25.5 | 25.5 | 39.215 | 0.0000   | 63.439 | 7925500   | 87   | 15.63 | 15.53 | 15.48 | 13.79 | 13.44 | 17.50 | 15.54 |
| 0.853 | 0.48 | 1.39 | Q80X44 | Phosphatidylinositol 5-phosphate 4-kinase type-2 beta      | Pip4k2b   | 2882 | 20 | 14 | 14 | 49.3 | 38.2 | 38.2 | 47.318 | 0.0000   | 99.178 | 27452000  | 171  | 16.28 | 15.89 | 16.39 | 15.24 | 15.50 | 15.11 | 15.99 |
| 1.031 | 0.48 | 1.39 | P35585 | AP-1 complex subunit mu-1                                  | Ap1m1     | 1027 | 21 | 21 | 21 | 55.1 | 55.1 | 55.1 | 48.542 | 0.0000   | 162.01 | 71593000  | 410  | 17.21 | 17.09 | 17.04 | 16.82 | 16.07 | 16.87 | 16.78 |
| 0.350 | 0.48 | 1.39 | Q8PNC0 | DMX-like protein 1                                         | Dmx1      | 163  | 16 | 16 | 16 | 8.6  | 8.6  | 8.6  | 336    | 0.0000   | 15.53  | 7096600   | 81   | 15.01 | 15.33 | 14.58 | 14.91 | 15.02 | 15.82 | 15.61 |
| 0.261 | 0.47 | 1.39 | Q9QYJ3 | DnaJ homolog subfamily B member 1                          | Dnajb1    | 5576 | 8  | 7  | 7  | 28.2 | 28.2 | 28.2 | 38.167 | 0.0000   | 36.573 | 1253000   | 118  | 16.93 | 16.19 | 16.27 | 16.19 | 13.38 | 16.22 | 16.82 |
| 0.714 | 0.47 | 1.39 | P97355 | Spermine synthase                                          | Sms       | 1629 | 10 | 10 | 10 | 54.6 | 54.6 | 54.6 | 41.313 | 0.0000   | 17.18  | 36680000  | 219  | 17.51 | 17.77 | 17.54 | 17.58 | 17.52 | 16.49 | 16.94 |
| 0.460 | 0.47 | 1.39 | Q3V0C5 | Ubiquitin carboxyl-terminal hydrolase 48                   | Usp48     | 2048 | 11 | 11 | 11 | 17.3 | 17.3 | 17.3 | 120.63 | 0.0000   | 45.106 | 5987000   | 68   | 14.59 | 14.25 | 14.32 | 14.78 | 12.94 | 13.98 | 13.95 |
| 1.596 | 0.47 | 1.39 | Q8CB94 | Glycogen phosphorylase, brain form                         | Pgbg      | 3545 | 59 | 49 | 43 | 68.3 | 60   | 53.1 | 96.729 | 0.0000   | 323.31 | 154560000 | 737  | 17.93 | 17.48 | 17.76 | 17.45 | 17.12 | 17.37 | 17.07 |
| 0.423 | 0.47 | 1.39 | E2JF22 | Pleurotinic mechanosensitive ion channel component 1       | Pleco1    | 215  | 3  | 3  | 3  | 3.8  | 3.8  | 3.8  | 292    | 0.0000   | 23.026 | 4982100   | 52   | 14.52 | 14.52 | 14.52 | 14.05 | 14.52 | 14.52 | 14.34 |
| 0.958 | 0.47 | 1.39 | P12382 | ATP-dependent 6-phosphofructokinase, liver type            | Pfkfb     | 3545 | 59 | 49 | 43 | 68.3 | 60   | 53.1 | 96.729 | 0.0000   | 323.31 | 154560000 | 737  | 17.93 | 17.48 | 17.76 | 17.45 | 17.12 | 17.37 | 17.07 |
| 1.907 | 0.47 | 1.39 | Q8BMD0 | Calcium-binding mitochondrial carrier protein ScaMC-1      | Sic25a2a4 | 3134 | 27 | 27 | 27 | 61.3 | 61.3 | 61.3 | 52.901 | 0.0000   | 323.31 | 175660000 | 773  | 18.70 | 18.41 | 18.54 | 18.28 | 17.88 | 18.12 | 18.03 |
| 0.488 | 0.47 | 1.39 | Q9D4H1 | Exocyst complex component 2                                | Exoc2     | 4976 | 20 | 20 | 20 | 25.8 | 25.8 | 25.8 | 103.96 | 0.0000   | 123.93 | 26819000  | 335  | 15.59 | 15.22 | 15.44 | 15.57 | 13.98 | 15.38 | 14.86 |
| 0.520 | 0.47 | 1.39 | Q9D3D6 | 37 kDa nuclear calcium uniporter regulator 1               | Ucnr1     | 4754 | 8  | 8  | 8  | 24.7 | 24.7 | 24.7 | 80.161 | 0.0000   | 16.146 | 8199000   | 104  | 14.71 | 14.12 | 14.43 | 14.10 | 14.22 | 14.86 | 14.34 |
| 0.365 | 0.47 | 1.39 | Q91X80 | Three-prime repair exonuclease 1                           | Trex1     | 4139 | 13 | 13 | 13 | 52.2 | 52.2 | 52.2 | 33.675 | 0.0000   | 120.89 | 31379000  | 194  | 15.63 | 15.51 | 15.43 | 16.21 | 14.04 | 15.29 | 14.67 |
| 0.607 | 0.47 | 1.39 | Q9DQJ4 | ADP-ribosylation factor-like protein 2                     | Arf2      | 4870 | 11 | 11 | 11 | 71.7 | 71.7 | 71.7 | 20.864 | 0.0000   | 63.544 | 20119000  | 191  | 16.23 | 16.41 | 16.09 | 16.39 | 16.15 | 15.16 | 15.38 |
| 3.301 | 0.47 | 1.39 | Q9DBN0 | Elongation factor 1-gamma                                  | Eef1g     | 5065 | 34 | 34 | 34 | 62.9 | 62.9 | 62.9 | 50.106 | 0.0000   | 323.31 | 589990000 | 1119 | 20.46 | 20.36 | 20.40 | 20.02 | 19.86 | 19.98 | 19.88 |
| 0.549 | 0.47 | 1.38 | A2R5V5 | DMX-like protein 1                                         | Dmx1      | 163  | 16 | 16 | 16 | 8.6  | 8.6  | 8.6  | 336    | 0.0000   | 15.53  | 7096600   | 81   | 15.01 | 15.33 | 14.58 | 14.91 | 15.02 | 15.82 | 15.61 |
| 0.327 | 0.47 | 1.38 | Q8BN21 | Serine/threonine-protein kinase VRK2                       | Vrk2      | 3152 | 10 | 10 | 10 | 23.9 | 23.9 | 23.9 | 58.118 | 0.0000   | 29.703 | 14006000  | 67   | 15.82 | 15.64 | 15.74 | 15.75 | 13.76 | 15.65 | 15.91 |
| 0.826 | 0.47 | 1.38 | Q7TN98 | Cytoplasmic polyadenylation element-binding protein 4      | Cpeb4     | 2757 | 13 | 13 | 9  | 25.1 | 25.1 | 25.1 | 80.121 | 0.0000   | 93.945 | 10911000  | 144  | 14.92 | 14.84 | 15.09 | 13.95 | 14.27 | 14.88 | 14.83 |
| 0.570 | 0.47 | 1.38 | P53811 | Phosphatidylinositol transfer protein beta isoform         | Pitgpb    | 1241 | 15 | 13 | 13 | 53.1 | 46.9 | 46.9 | 31.487 | 0.0000   | 40.068 | 21397000  | 208  | 15.72 | 15.52 | 15.85 | 15.59 | 14.30 | 15.57 | 15.46 |
| 0.373 | 0.47 | 1.38 | Q8T1U4 | Mitofusin-1                                                | Mfn1      | 2940 | 5  | 5  | 5  | 9.6  | 9.6  | 9.6  | 83.725 | 0.0000   | 29.94  | 2208900   | 19   | 14.32 | 13.29 | 13.46 | 13.39 | 13.16 | 14.13 | 12.21 |
| 1.680 | 0.47 | 1.38 | Q8CQY5 | Magnesium transporter protein 1                            | Magi1     | 4541 | 10 | 9  | 9  | 22.7 | 22.7 | 22.7 | 37.969 | 0.0000   | 27.617 | 23829000  | 129  | 17.17 | 17.82 | 17.68 | 17.17 | 17.82 | 17.15 | 17.31 |
| 0.744 | 0.47 | 1.38 | Q8R059 | UDP-glucose 4-epimerase                                    | Gale      | 3748 | 13 | 13 | 13 | 43.2 | 43.2 | 43.2 | 38.224 | 0.0000   | 137.25 | 14950000  | 164  | 15.47 | 15.09 | 15.16 | 15.41 | 14.43 | 14.88 | 14.37 |
| 1.097 | 0.47 | 1.38 | Q80UM3 | N-alpha-acetyltransferase 15, NatA auxiliary subunit       | Naa15     | 2832 | 42 | 38 | 51 | 51.2 | 46.6 | 46.6 | 100.96 | 0.0000   | 293.45 | 101920000 | 600  | 16.93 | 16.48 | 16.75 | 16.14 | 15.88 | 16.58 | 16.42 |
| 0.521 | 0.47 | 1.38 | Q8R3Y8 | Interferon regulatory factor 2-binding protein 1           | Irf2bp1   | 3860 | 5  | 4  | 4  | 12.5 | 11.3 | 11.3 | 61.75  | 0.0000   | 23.07  | 5377400   | 85   | 14.94 | 14.87 | 15.20 | 14.72 | 13.55 | 14.94 | 14.95 |
| 0.360 | 0.47 | 1.38 | Q35678 | Monoglyceride lipase                                       | Mgl1      | 677  | 16 | 16 | 16 | 67.7 | 67.7 | 67.7 | 33.387 | 0.0000   | 140.93 | 4109600   | 148  | 14.02 | 13.99 | 13.99 | 14.10 | 13.99 | 12.63 | 12.34 |
| 1.753 | 0.47 | 1.38 | Q8BMP6 | Golgi resident protein CGP60                               | Acb3      | 3145 | 11 | 11 | 11 | 30.7 | 30.7 | 30.7 | 60.18  | 0.0000   | 186.49 | 29304000  | 213  | 16.67 | 16.84 | 16.68 | 16.34 | 15.95 | 16.41 | 16.35 |
| 0.592 | 0.47 | 1.38 | Q8R0A7 | Uncharacterized protein KIAA0513                           | Kiaa0513  | 3754 | 6  | 6  | 6  | 22.9 | 22.9 | 22.9 | 46.318 | 0.0000   | 16.379 | 3746200   | 61   | 14.29 | 13.79 | 13.76 | 14.27 | 13.27 | 12.96 | 13.43 |
| 0.519 | 0.47 | 1.38 | Q8C3X2 | Coiled-coil domain-containing protein 90B, mitochondrial   | Ccdc90b   | 3107 | 11 | 11 | 11 | 55.9 | 55.9 | 55.9 | 29.596 | 0.0000</ |        |           |      |       |       |       |       |       |       |       |

|       |      |      |        |                                                                          |          |      |    |    |    |       |      |      |         |        |          |           |      |       |       |       |       |       |       |       |
|-------|------|------|--------|--------------------------------------------------------------------------|----------|------|----|----|----|-------|------|------|---------|--------|----------|-----------|------|-------|-------|-------|-------|-------|-------|-------|
| 0.573 | 0.43 | 1.35 | P60670 | Nuclear protein localization protein 4 homolog                           | Nploc4   | 1357 | 25 | 25 | 25 | 49.8  | 49.8 | 49.8 | 68.016  | 0.0000 | 115.63   | 58369000  | 373  | 16.66 | 16.82 | 16.88 | 16.70 | 15.51 | 16.52 | 16.71 |
| 0.249 | 0.43 | 1.35 | Q80UJ1 | Ankyrin repeat and zinc finger domain-containing protein 1               | Ankzf1   | 2837 | 6  | 6  | 6  | 12.4  | 12.4 | 12.4 | 82.975  | 0.0000 | 16.946   | 5013500   | 32   | 15.06 | 14.70 | 14.85 | 15.67 | 12.91 | 14.84 | 14.34 |
| 0.229 | 0.43 | 1.35 | Q6ZVY3 | 40S ribosomal protein S27-like                                           | Rps27i   | 2710 | 6  | 3  | 3  | 41.7  | 15.5 | 15.5 | 9.4771  | 0.0000 | 15.159   | 52000000  | 122  | 18.29 | 18.04 | 18.40 | 18.28 | 15.96 | 18.63 | 18.43 |
| 2.028 | 0.43 | 1.34 | Q9JMA1 | Ubiquitin carboxyl-terminal hydrolase 14                                 | Ubp14    | 5503 | 25 | 25 | 25 | 50.3  | 50.3 | 50.3 | 56.001  | 0.0000 | 323.31   | 113090000 | 589  | 17.83 | 17.96 | 17.89 | 17.67 | 17.34 | 17.49 | 17.36 |
| 0.533 | 0.43 | 1.34 | Q8V8N6 | Aryl-CoA synthetase family member 2, mitochondrial                       | Acsf2    | 3933 | 13 | 13 | 13 | 67.95 | 13.9 | 13.9 | 159.26  | 0.0000 | 164.1500 | 150000    | 89   | 15.34 | 15.34 | 15.34 | 15.34 | 15.34 | 15.34 | 15.34 |
| 1.099 | 0.43 | 1.34 | Q8VHE0 | Translocation protein SEC63 homolog                                      | Secf3    | 4018 | 11 | 11 | 11 | 15.4  | 15.4 | 15.4 | 87.889  | 0.0000 | 82.615   | 31661000  | 252  | 16.01 | 15.36 | 15.76 | 15.23 | 15.56 | 15.22 | 15.12 |
| 1.170 | 0.43 | 1.34 | Q99P88 | Nuclear pore complex protein Nup155                                      | Nup155   | 4503 | 19 | 19 | 19 | 18.2  | 18.2 | 18.2 | 155.12  | 0.0000 | 323.31   | 31919000  | 370  | 16.27 | 16.24 | 16.26 | 15.59 | 15.58 | 15.90 | 16.24 |
| 0.892 | 0.43 | 1.34 | Q88708 | Origin recognition complex subunit 4                                     | Orc4     | 561  | 2  | 2  | 1  | 6.9   | 6.9  | 3.7  | 49.981  | 0.0002 | 5.4064   | 1097100   | 16   | 13.24 | 12.98 | 13.25 | 12.49 | 12.81 | 12.40 | 13.23 |
| 1.249 | 0.43 | 1.34 | Q8Q7X3 | Dual specificity protein phosphatase 3                                   | Dusp3    | 5043 | 9  | 9  | 9  | 69.2  | 69.2 | 69.2 | 20.472  | 0.0000 | 323.31   | 120590000 | 426  | 19.03 | 16.93 | 16.93 | 16.90 | 16.35 | 18.83 | 18.56 |
| 1.688 | 0.43 | 1.34 | Q35286 | Pre-mRNA-splicing factor ATP-dependent RNA helicase DHX15                | Dhx15    | 352  | 43 | 43 | 42 | 53.5  | 53.5 | 53.5 | 91.006  | 0.0000 | 308.44   | 186960000 | 1076 | 17.30 | 17.30 | 17.45 | 17.02 | 17.30 | 17.02 | 16.86 |
| 1.125 | 0.43 | 1.34 | P95646 | C-terminal-binding protein 2                                             | Ctbp2    | 1290 | 15 | 9  | 8  | 22.9  | 22.5 | 20.9 | 48.956  | 0.0000 | 60.155   | 18091000  | 123  | 16.29 | 16.09 | 16.09 | 15.98 | 16.10 | 15.41 | 15.69 |
| 0.484 | 0.42 | 1.34 | Q9D305 | Syntaxin-11                                                              | Stx11    | 4966 | 8  | 8  | 8  | 36.2  | 36.2 | 36.2 | 33.369  | 0.0000 | 27.106   | 18701000  | 110  | 16.24 | 16.22 | 16.40 | 16.48 | 15.03 | 16.29 | 15.68 |
| 0.531 | 0.42 | 1.34 | Q9WUK2 | Eukaryotic translation initiation factor 4H                              | EIf4h    | 5712 | 13 | 13 | 13 | 53.2  | 53.2 | 53.2 | 27.341  | 0.0000 | 93.209   | 19224000  | 85   | 15.82 | 16.54 | 16.26 | 16.17 | 16.23 | 15.07 | 15.67 |
| 0.903 | 0.42 | 1.34 | Q9CXY6 | 26S proteasome non-ATPase regulatory subunit 8                           | Psm8     | 4748 | 8  | 8  | 8  | 24.9  | 24.9 | 24.9 | 39.93   | 0.0000 | 15.389   | 8077000   | 65   | 16.31 | 16.70 | 16.42 | 15.66 | 15.74 | 15.92 |       |
| 0.460 | 0.42 | 1.34 | Q9DB88 | Trans-1,2-dihydrobenzene-1,2-diol dehydrogenase                          | Dhdh     | 5140 | 16 | 16 | 16 | 53.8  | 53.8 | 53.8 | 36.3    | 0.0000 | 224.29   | 29937000  | 282  | 15.43 | 15.13 | 15.52 | 13.98 | 15.45 | 15.01 | 15.33 |
| 2.485 | 0.42 | 1.34 | Q07076 | Annexin A7                                                               | Anxa7    | 1753 | 33 | 32 | 32 | 52.7  | 52.7 | 52.7 | 49.925  | 0.0000 | 323.31   | 313780000 | 1119 | 18.96 | 18.74 | 18.76 | 18.45 | 18.43 | 18.46 | 18.26 |
| 0.754 | 0.42 | 1.34 | Q9ES87 | Retinon-3                                                                | Rtn3     | 5333 | 5  | 5  | 5  | 7.7   | 7.7  | 7.7  | 103.88  | 0.0000 | 198.57   | 65293000  | 239  | 18.12 | 17.87 | 18.18 | 17.19 | 17.47 | 17.67 | 18.21 |
| 1.589 | 0.42 | 1.34 | Q9DBV0 | Mitochondrial-induced differentiation-associated protein 2               | Cdnp2    | 5160 | 3  | 3  | 3  | 7.6   | 7.6  | 7.6  | 56.268  | 0.0000 | 7.1927   | 5081100   | 35   | 15.69 | 15.78 | 15.41 | 15.92 | 13.57 | 15.62 | 15.52 |
| 1.320 | 0.42 | 1.34 | Q9DSV5 | Cullin-5                                                                 | Cul5     | 4986 | 27 | 27 | 27 | 40.3  | 40.3 | 40.3 | 90.973  | 0.0000 | 92.756   | 24174000  | 199  | 15.51 | 15.40 | 15.52 | 15.40 | 14.77 | 14.96 | 15.11 |
| 1.613 | 0.42 | 1.34 | P12265 | Beta-glucuronidase                                                       | Gusb     | 755  | 37 | 37 | 37 | 49.7  | 49.7 | 49.7 | 74.194  | 0.0000 | 323.31   | 477460000 | 1070 | 19.71 | 19.89 | 19.76 | 19.07 | 19.53 | 19.50 | 19.38 |
| 0.351 | 0.42 | 1.34 | P90295 | Arylamine N-acetyltransferase 2                                          | Nat2     | 1178 | 9  | 9  | 9  | 46.2  | 46.2 | 46.2 | 33.701  | 0.0000 | 65.58    | 18901000  | 127  | 16.31 | 16.34 | 16.08 | 15.27 | 15.12 | 16.02 | 16.78 |
| 0.737 | 0.42 | 1.34 | Q9CZ28 | Vacuole-sorting protein SNF8                                             | Snf8     | 4815 | 10 | 10 | 10 | 51.2  | 51.2 | 51.2 | 28.886  | 0.0000 | 81.385   | 20674000  | 111  | 16.41 | 16.58 | 16.85 | 15.99 | 15.81 | 16.21 | 16.79 |
| 0.638 | 0.42 | 1.34 | P11928 | 2-5-oligoadenylate synthase 1A                                           | Oas1a    | 752  | 21 | 21 | 21 | 56.4  | 56.4 | 56.4 | 42.428  | 0.0000 | 236.37   | 66143000  | 562  | 16.42 | 16.34 | 16.40 | 16.20 | 16.57 | 15.73 | 15.40 |
| 0.719 | 0.42 | 1.33 | Q54890 | Integrin beta-3                                                          | Itpb3    | 431  | 3  | 3  | 3  | 5.2   | 5.2  | 5.2  | 86.738  | 0.0000 | 38.83    | 2802200   | 45   | 15.42 | 15.02 | 15.13 | 14.50 | 14.31 | 15.23 | 15.04 |
| 0.47  | 0.42 | 1.33 | Q8BY87 | Ubiquitin carboxyl-terminal hydrolase 47                                 | Ubp47    | 5287 | 20 | 20 | 20 | 22.6  | 22.6 | 22.6 | 50.605  | 0.0000 | 51.601   | 18988000  | 181  | 15.40 | 15.34 | 15.50 | 15.75 | 14.13 | 15.35 | 15.14 |
| 1.163 | 0.42 | 1.33 | Q9Z379 | Calcium/calmodulin-dependent protein kinase type II subunit gamma        | Kam2g    | 4287 | 11 | 7  | 4  | 27.2  | 18   | 13   | 19      | 0.0000 | 40.346   | 9165400   | 110  | 15.42 | 15.14 | 15.05 | 14.92 | 13.31 | 14.90 | 14.51 |
| 0.371 | 0.42 | 1.33 | Q3TL0  | Trafficking protein particle complex subunit 10                          | Trappc10 | 1860 | 11 | 11 | 11 | 13.9  | 13.9 | 13.9 | 141.49  | 0.0000 | 43.953   | 5511300   | 62   | 14.41 | 13.37 | 14.25 | 13.14 | 14.48 | 13.74 | 13.02 |
| 2.853 | 0.42 | 1.33 | Q8BQ07 | Phospholipase D4                                                         | Plid4    | 2957 | 20 | 20 | 20 | 48.7  | 48.7 | 48.7 | 56.153  | 0.0000 | 194.84   | 188180000 | 581  | 19.45 | 19.52 | 19.37 | 19.17 | 19.89 | 19.00 | 18.97 |
| 0.914 | 0.42 | 1.33 | Q6Z351 | Transferrin receptor protein 1                                           | Tfrc     | 2891 | 26 | 26 | 26 | 45.6  | 45.6 | 45.6 | 85.73   | 0.0000 | 176.95   | 54471000  | 287  | 17.00 | 16.97 | 16.96 | 16.56 | 17.09 | 16.43 | 16.21 |
| 0.245 | 0.42 | 1.33 | Q61830 | Macrophage mannose receptor 1                                            | Mrc1     | 2334 | 25 | 25 | 25 | 25.3  | 25.3 | 25.3 | 164.98  | 0.0000 | 151.27   | 23936000  | 245  | 14.53 | 14.54 | 14.68 | 14.54 | 14.54 | 14.54 | 14.54 |
| 1.901 | 0.41 | 1.33 | P24547 | Inosine-5-monophosphate dehydrogenase 2                                  | Impdh2   | 889  | 31 | 29 | 57 | 55.8  | 55.8 | 55.8 | 55.814  | 0.0000 | 314.21   | 88459000  | 626  | 16.98 | 17.02 | 16.94 | 16.61 | 16.31 | 16.74 | 16.60 |
| 0.990 | 0.41 | 1.33 | Q35969 | Guanidinoacetate N-methyltransferase                                     | Gamt     | 415  | 9  | 9  | 9  | 52.5  | 52.5 | 52.5 | 26.336  | 0.0000 | 60.122   | 31695000  | 191  | 16.21 | 16.06 | 15.99 | 15.88 | 15.97 | 15.60 | 15.22 |
| 1.224 | 0.41 | 1.33 | Q8R317 | Ubiquitin-1                                                              | Ubpq1    | 3830 | 7  | 7  | 5  | 25.9  | 25.9 | 21.6 | 61.976  | 0.0000 | 207.25   | 11255000  | 123  | 15.34 | 15.73 | 15.70 | 15.15 | 15.24 | 14.89 | 15.43 |
| 0.774 | 0.41 | 1.33 | Q8V815 | 12S-oligoadenylate synthase 3                                            | Oas3     | 4033 | 30 | 30 | 30 | 42.3  | 42.3 | 42.3 | 126.333 | 0.0000 | 323.31   | 121980000 | 607  | 17.57 | 17.57 | 17.37 | 17.51 | 16.97 | 17.37 | 17.37 |
| 0.843 | 0.41 | 1.33 | Q8D6Y7 | Mitochondrial peptide methionine sulfoxide reductase                     | Mera     | 5012 | 10 | 10 | 10 | 55.4  | 55.4 | 55.4 | 25.988  | 0.0000 | 28.872   | 32122000  | 177  | 16.19 | 15.95 | 16.30 | 16.20 | 15.40 | 16.02 | 15.39 |
| 1.331 | 0.41 | 1.33 | Q9D906 | Ubiquitin-like modifier-activating enzyme ATG7                           | Atg7     | 5089 | 33 | 33 | 33 | 54    | 54   | 54   | 77.519  | 0.0000 | 302.48   | 17517000  | 514  | 16.65 | 16.29 | 16.45 | 16.18 | 15.76 | 16.11 | 16.07 |
| 0.802 | 0.41 | 1.33 | Q35134 | DNA-directed RNA polymerase I subunit RPA1                               | Pola1a   | 341  | 8  | 8  | 8  | 7.3   | 7.3  | 7.3  | 194.11  | 0.0000 | 26.563   | 5280800   | 59   | 14.89 | 14.58 | 15.00 | 14.44 | 13.89 | 14.79 | 14.54 |
| 0.570 | 0.41 | 1.33 | Q9D353 | 30S ribosomal protein L4, mitochondrial                                  | Lmr4     | 4963 | 29 | 29 | 29 | 14.5  | 14.5 | 14.5 | 91.389  | 0.0000 | 7.2395   | 2373800   | 133  | 12.94 | 13.66 | 13.66 | 13.31 | 13.66 | 13.66 | 13.66 |
| 0.566 | 0.41 | 1.33 | Q6R5N8 | Toll-like receptor 13                                                    | Tlr13    | 2653 | 19 | 19 | 19 | 21.5  | 21.5 | 21.5 | 114.44  | 0.0000 | 160.93   | 47569000  | 300  | 17.93 | 17.18 | 17.36 | 17.62 | 16.06 | 17.15 | 17.07 |
| 0.331 | 0.41 | 1.33 | P58044 | Isopentenyl-diphosphate Delta-isomerase 1                                | Idi1     | 1304 | 6  | 6  | 6  | 34.4  | 34.4 | 34.4 | 26.289  | 0.0000 | 131.06   | 13356000  | 115  | 15.83 | 15.68 | 15.98 | 14.77 | 16.49 | 14.61 | 15.55 |
| 0.804 | 0.41 | 1.33 | Q80Y17 | Lethal(2) giant larvae protein homolog 1                                 | Lgl1     | 2894 | 7  | 7  | 7  | 12    | 12   | 12   | 112.62  | 0.0000 | 14.495   | 3015800   | 30   | 13.81 | 14.10 | 13.43 | 13.55 | 13.71 | 13.20 | 13.03 |
| 0.479 | 0.41 | 1.33 | Q8BHF7 | CDP-diacylglycerol--glycerol-3-phosphate 3-phosphatidyltransferase, mito | Pgs1     | 3035 | 10 | 10 | 10 | 22.4  | 22.4 | 22.4 | 62.488  | 0.0000 | 64.122   | 13837000  | 138  | 15.29 | 15.04 | 15.18 | 15.55 | 14.02 | 14.62 | 14.85 |
| 0.342 | 0.41 | 1.33 | Q9D353 | 30S ribosomal protein L4, mitochondrial                                  | Lmr4     | 4963 | 29 | 29 | 29 | 14.5  | 14.5 | 14.5 | 91.389  | 0.0000 | 7.2395   | 2373800   | 133  | 12.94 | 13.66 | 13.66 | 13.31 | 13.66 | 13.66 | 13.66 |
| 0.839 | 0.41 | 1.32 | Q61542 | SNAR-related lipid transfer protein 3                                    | Stard3   | 2308 | 7  | 7  | 7  | 27.6  | 27.6 | 27.6 | 50.469  | 0.0000 | 86.531   | 31360000  | 142  | 14.81 | 14.43 | 14.69 | 14.27 | 14.66 | 13.77 | 14.24 |
| 1.060 | 0.40 | 1.32 | Q9GK23 | Ufm1-specific protease 2                                                 | Ufp2     | 4360 | 13 | 13 | 13 | 47.9  | 47.9 | 47.9 | 52.515  | 0.0000 | 59.414   | 14738000  | 151  | 15.25 | 15.15 | 15.22 | 14.91 | 15.20 | 14.48 | 14.62 |
| 1.301 | 0.40 | 1.32 | Q8BTK9 | Inactive hydroxysteroid dehydrogenase-like protein 1                     | Hsd1i    | 3211 | 11 | 11 | 11 | 43    | 43   | 43   | 36.867  | 0.0000 | 118.28   | 28130000  | 170  | 16.41 | 16.03 | 15.82 | 15.60 | 15.84 | 15.65 | 15.65 |
| 1.228 | 0.40 | 1.32 | P90924 | Tubulin beta-5 chain                                                     | Tub5     | 169  | 37 | 7  | 6  | 73.2  | 20.5 | 17.1 | 46.67   | 0.0000 | 32.31    | 107830000 | 824  | 22.61 | 21.96 | 22.31 | 21.69 | 21.32 | 21.94 | 21.72 |
| 0.183 | 0.40 | 1.32 | Q8BZ79 | Laconase domain-containing protein 1                                     | Lacc1    | 3319 | 6  | 6  | 6  | 23.5  | 23.5 | 23.5 | 47.514  | 0.0000 | 155.97   | 912100    | 72   | 14.90 | 15.29 | 15.36 | 16.13 | 12.93 | 15.65 | 14.41 |
| 0.400 | 0.40 | 1.32 | Q8VDK1 | Nitrilase homolog 1                                                      | Nit1     | 3957 | 8  | 8  | 8  | 40.2  | 40.2 | 40.2 | 35.705  | 0.0000 | 96.486   | 22808000  | 214  | 16.48 | 16.16 | 16.14 | 15.70 | 16.92 | 15.34 | 15.47 |
| 1.389 | 0.40 | 1.32 | Q9Z2F4 | Tubulin beta-6 chain                                                     | Tub6     | 4254 | 30 | 17 | 15 | 72.5  | 55.3 | 50.1 | 50.09   | 0.0000 | 220.1    | 47549000  | 338  | 17.63 | 17.44 | 17.35 | 17.31 | 17.22 | 16.88 | 16.87 |
| 0.487 | 0.40 | 1.32 | Q9F2E7 | Nuclear fragile X mental retardation-interacting protein 2               | Nufip2   | 4204 | 12 | 12 | 12 | 23.6  | 23.6 | 23.6 | 75.656  | 0.0000 |          |           |      |       |       |       |       |       |       |       |

|       |      |      |               |                                                                                   |           |        |      |      |      |      |      |      |        |        |         |           |      |       |       |       |       |       |       |       |
|-------|------|------|---------------|-----------------------------------------------------------------------------------|-----------|--------|------|------|------|------|------|------|--------|--------|---------|-----------|------|-------|-------|-------|-------|-------|-------|-------|
| 0.386 | 0.38 | 1.30 | Q9WU08        | TNFAIP3-interacting protein 1                                                     | Trip1     | 5724   | 5    | 5    | 5    | 9.4  | 9.4  | 9.4  | 73.049 | 0.0000 | 20.585  | 17.16400  | 45   | 13.95 | 13.46 | 13.38 | 13.33 | 12.53 | 12.93 | 14.09 |
| 0.350 | 0.38 | 1.30 | Q6YQ21        | Heparanase;Heparanase 8 kDa subunit;Heparanase 50 kDa subunit                     | Hpse      | 2673   | 14   | 14   | 14   | 37.9 | 37.9 | 37.9 | 60.065 | 0.0000 | 146.29  | 36182000  | 240  | 16.94 | 16.52 | 16.45 | 15.72 | 15.61 | 16.52 | 17.19 |
| 0.712 | 0.38 | 1.30 | Q91ZK1        | Ras-related protein Rab-4B                                                        | Rab4b     | 4198   | 12   | 12   | 11   | 70.0 | 70.0 | 63.4 | 23.629 | 0.0000 | 135.42  | 23147000  | 264  | 15.96 | 15.71 | 15.92 | 15.24 | 15.04 | 15.74 | 15.92 |
| 0.186 | 0.38 | 1.30 | Q9N9B4        | 28S ribosomal protein S18b, mitochondrial                                         | Mps18b    | 4485   | 3    | 3    | 3    | 24.8 | 24.8 | 24.8 | 28.702 | 0.0000 | 26.142  | 4572200   | 48   | 14.40 | 14.34 | 15.07 | 14.51 | 14.53 | 15.45 | 12.42 |
| 1.195 | 0.38 | 1.30 | Q6Z465        | Synaptic vesicle membrane protein VAMP-1 homolog                                  | Vamp1     | 43.096 | 26.3 | 26.3 | 26.3 | 60.3 | 60.3 | 60.3 | 43.096 | 0.0000 | 323.31  | 60558000  | 1403 | 20.00 | 20.00 | 20.00 | 20.00 | 20.00 | 20.00 | 19.76 |
| 1.129 | 0.37 | 1.30 | Q8H958        | Glucosamine-6-phosphate isomerase 1                                               | Gnpi1     | 4888   | 22   | 22   | 20   | 88.6 | 88.6 | 84.4 | 32.540 | 0.0000 | 32.331  | 150310000 | 592  | 18.78 | 18.39 | 18.44 | 18.23 | 17.83 | 18.31 | 18.25 |
| 0.266 | 0.37 | 1.30 | Q8R488        | NACHT, LRR and PYD domains-containing protein 3                                   | Nlrp3     | 3867   | 6    | 6    | 6    | 6.7  | 6.7  | 6.7  | 118.27 | 0.0000 | 29.207  | 3292200   | 35   | 13.74 | 12.95 | 12.94 | 12.70 | 12.47 | 14.11 | 12.06 |
| 0.975 | 0.37 | 1.30 | P61021        | Ras-related protein Rab-5B                                                        | Rab5b     | 1364   | 11   | 7    | 7    | 66   | 47.9 | 47.9 | 23.707 | 0.0000 | 74.936  | 60330200  | 204  | 18.11 | 18.00 | 18.18 | 17.43 | 17.62 | 17.68 | 18.16 |
| 1.439 | 0.37 | 1.30 | P08030        | Adenine phosphoribosyltransferase                                                 | Aprt      | 675    | 18   | 18   | 17   | 96.7 | 96.7 | 96.1 | 19.724 | 0.0000 | 265.05  | 285310000 | 644  | 19.86 | 19.85 | 19.52 | 19.28 | 19.51 | 19.49 | 19.33 |
| 0.317 | 0.37 | 1.29 | Q9BR57        | Heptadyl-tryptophan cis-trans isomerase F, mitochondrial                          | Hptf      | 4392   | 6    | 5    | 5    | 33.5 | 33.5 | 33.5 | 21.737 | 0.0000 | 15.397  | 6546700   | 42   | 15.05 | 15.05 | 15.36 | 15.02 | 15.05 | 15.23 | 14.80 |
| 2.250 | 0.37 | 1.29 | Q8H959        | Syntaxin-binding protein 1                                                        | Syntaxin1 | 279    | 15   | 15   | 15   | 33.2 | 33.2 | 33.2 | 67.568 | 0.0000 | 71.485  | 16453000  | 151  | 15.85 | 15.80 | 15.70 | 15.34 | 15.52 | 15.28 | 15.50 |
| 0.739 | 0.37 | 1.29 | Q61235        | Beta-2-syntrophin                                                                 | Sntb2     | 2283   | 10   | 10   | 10   | 21.5 | 21.5 | 21.5 | 56.381 | 0.0000 | 28.839  | 14583000  | 132  | 15.85 | 15.46 | 15.88 | 14.99 | 15.74 | 15.12 | 15.58 |
| 0.747 | 0.37 | 1.29 | Q8M8M0        | CB1 cannabinoid receptor-interacting protein 1                                    | Crip1     | 2113   | 5    | 5    | 5    | 53.7 | 53.7 | 53.7 | 18.612 | 0.0000 | 40.026  | 2617400   | 29   | 14.48 | 14.14 | 13.79 | 14.04 | 13.98 | 13.57 | 13.47 |
| 1.146 | 0.37 | 1.29 | Q8P9R2        | Serine/threonine protein kinase OSR1                                              | Osrl      | 2592   | 9    | 9    | 9    | 28.1 | 28.1 | 28.1 | 58.213 | 0.0000 | 134.92  | 21550000  | 189  | 15.12 | 16.18 | 16.05 | 15.54 | 15.49 | 16.03 | 15.92 |
| 0.405 | 0.37 | 1.29 | Q61712        | DnaJ homolog subfamily C member 1                                                 | Dnajc1    | 2327   | 11   | 11   | 11   | 23.7 | 23.7 | 23.7 | 63.869 | 0.0000 | 32.258  | 8122400   | 75   | 14.10 | 14.39 | 14.89 | 14.25 | 13.67 | 14.85 | 13.59 |
| 0.317 | 0.37 | 1.29 | Q8R3L2        | Transcription factor Z5                                                           | Tcfz5     | 3850   | 3    | 3    | 3    | 7.2  | 7.2  | 7.2  | 76.684 | 0.0000 | 7.3655  | 1862600   | 19   | 14.15 | 13.94 | 14.78 | 14.61 | 12.90 | 13.89 | 14.27 |
| 1.780 | 0.37 | 1.29 | Q9QDCH        | Eukaryotic translation initiation factor 3 subunit F                              | Eif3f     | 5214   | 15   | 15   | 15   | 48.2 | 48.2 | 48.2 | 37.984 | 0.0000 | 32.27   | 87371000  | 445  | 18.01 | 17.81 | 17.71 | 17.58 | 17.58 | 17.37 | 17.36 |
| 1.200 | 0.37 | 1.29 | P42227        | Signal transducer and activator of transcription 3                                | Stat3     | 1076   | 33   | 33   | 33   | 54.9 | 54.9 | 54.9 | 68.053 | 0.0000 | 323.31  | 86404000  | 657  | 16.64 | 16.35 | 16.51 | 16.47 | 16.06 | 16.08 | 15.93 |
| 0.170 | 0.37 | 1.29 | Q8CAK1        | Pulvative transferase CAF17 homolog, mitochondrial                                | Iba57     | 3429   | 6    | 6    | 6    | 19.8 | 19.8 | 19.8 | 38.399 | 0.0000 | 22.326  | 4293800   | 46   | 14.30 | 14.89 | 14.88 | 12.26 | 14.99 | 15.10 | 14.94 |
| 1.529 | 0.37 | 1.29 | Q9R8K5        | Phosphoserine aminotransferase                                                    | Psat1     | 4366   | 26   | 26   | 26   | 65.7 | 65.7 | 65.7 | 40.472 | 0.0000 | 223.76  | 87357000  | 612  | 17.12 | 17.01 | 17.15 | 16.91 | 16.84 | 16.69 | 16.46 |
| 0.258 | 0.37 | 1.29 | Q9R059        | Four and a half LIM domains protein 3                                             | Flh3      | 5614   | 7    | 7    | 7    | 31.8 | 31.8 | 31.8 | 31.794 | 0.0000 | 11.865  | 10992000  | 65   | 15.18 | 15.72 | 15.71 | 15.50 | 15.30 | 13.85 | 16.04 |
| 3.049 | 0.37 | 1.29 | Q9EP09        | Phosphatidylinositol phosphatase SAC1                                             | Sacm1     | 5243   | 30   | 30   | 30   | 54.9 | 54.9 | 54.9 | 66.943 | 0.0000 | 323.31  | 106720000 | 721  | 17.56 | 17.45 | 17.46 | 17.18 | 17.02 | 17.15 | 17.17 |
| 0.733 | 0.37 | 1.29 | Q8C129        | Leucyl-cystinyl aminopeptidase                                                    | Lncpe     | 3350   | 23   | 23   | 22   | 28.2 | 28.2 | 28.2 | 117.3  | 0.0000 | 157.96  | 41955000  | 308  | 16.59 | 16.35 | 16.46 | 16.55 | 16.01 | 16.22 | 16.01 |
| 2.643 | 0.37 | 1.29 | P25799        | Nuclear factor NF-kappa-B p105 subunit;Nuclear factor NF-kappa-B p50 subunit      | Nfkb1     | 9113   | 19   | 19   | 19   | 29.9 | 29.9 | 29.9 | 29.9   | 0.0000 | 208.29  | 28864000  | 252  | 16.20 | 16.39 | 16.38 | 15.90 | 15.97 | 16.04 | 15.91 |
| 0.864 | 0.37 | 1.29 | Q9D7B6        | Isobutyryl-CoA dehydrogenase, mitochondrial                                       | Acad8     | 5027   | 14   | 14   | 14   | 47.7 | 47.7 | 47.7 | 45.019 | 0.0000 | 105.8   | 31388000  | 256  | 16.14 | 15.91 | 16.16 | 15.80 | 15.28 | 16.07 | 15.67 |
| 0.390 | 0.37 | 1.29 | P59439        | Hermansky-Pudlak syndrome 5 protein homolog                                       | Hps5      | 1037   | 7    | 7    | 7    | 10.4 | 10.4 | 10.4 | 126.34 | 0.0000 | 38.1200 | 3812000   | 95   | 12.55 | 13.07 | 13.07 | 12.50 | 12.12 | 13.41 | 12.78 |
| 0.420 | 0.37 | 1.29 | Q9KSR8        | Probable aminopeptidase NFEPL1                                                    | Nfepl1    | 2526   | 16   | 16   | 16   | 49.6 | 49.6 | 49.6 | 55.549 | 0.0000 | 96.85   | 27622000  | 2437 | 16.73 | 16.68 | 16.88 | 16.73 | 16.68 | 16.79 | 16.79 |
| 0.523 | 0.37 | 1.29 | Q99M71        | Mammalian spermidin-related protein 1                                             | Epdrl     | 4457   | 3    | 3    | 2    | 16.1 | 16.1 | 10.7 | 25.485 | 0.0002 | 5.8667  | 1910600   | 33   | 13.60 | 13.26 | 13.40 | 13.78 | 12.82 | 12.58 | 13.03 |
| 0.699 | 0.37 | 1.29 | Q9D753        | Exosome complex component RRP43                                                   | Exos8     | 5020   | 6    | 6    | 6    | 29.7 | 29.7 | 29.7 | 29.949 | 0.0000 | 25.614  | 6160900   | 79   | 15.27 | 15.15 | 15.58 | 15.03 | 15.45 | 12.36 | 14.45 |
| 1.096 | 0.36 | 1.29 | Q60854        | Serpin B6                                                                         | Serpinb6  | 2212   | 44   | 44   | 44   | 94.4 | 94.4 | 94.4 | 42.598 | 0.0000 | 323.31  | 56339000  | 2098 | 19.56 | 19.46 | 19.53 | 19.39 | 19.34 | 19.09 | 18.78 |
| 0.244 | 0.36 | 1.29 | Q92523        | Serine/threonine/calcium exchanger 6, mitochondrial                               | Sclx6a1   | 431    | 3    | 3    | 3    | 3.1  | 3.1  | 3.1  | 64.364 | 0.0000 | 38.453  | 1391900   | 32   | 11.52 | 11.52 | 12.61 | 11.52 | 11.52 | 11.91 | 13.68 |
| 0.244 | 0.36 | 1.29 | Q9P9T1        | Rho GDP-ATPase inhibitor 1                                                        | Arhgdia   | 4516   | 24   | 24   | 24   | 94.6 | 94.6 | 94.6 | 23.407 | 0.0000 | 323.31  | 117440000 | 1400 | 21.29 | 21.23 | 21.16 | 20.98 | 20.90 | 20.85 | 20.71 |
| 0.191 | 0.36 | 1.29 | Q8BJL0        | SWI/SNF-related matrix-associated actin-dependent regulator of chromatin Smarcal1 | Smrca1    | 3079   | 4    | 4    | 4    | 6.7  | 6.7  | 6.7  | 100.84 | 0.0002 | 5.7276  | 2768000   | 46   | 14.01 | 13.82 | 14.32 | 13.32 | 14.43 | 14.88 | 12.12 |
| 0.121 | 0.36 | 1.29 | Q8RZJ3        | 28S ribosomal protein S26, mitochondrial                                          | Mps26     | 2920   | 6    | 6    | 6    | 3.7  | 3.7  | 3.7  | 23.443 | 0.0000 | 25.695  | 6895800   | 71   | 14.88 | 14.64 | 14.97 | 14.69 | 11.92 | 16.41 | 14.85 |
| 0.645 | 0.36 | 1.29 | Q8BJL9        | Isocitrate dehydrogenase, mitochondrial                                           | Icdh      | 34.5   | 34.5 | 34.5 | 34.5 | 34.5 | 34.5 | 34.5 | 112.8  | 0.0000 | 239.49  | 70373000  | 67   | 16.76 | 16.58 | 16.51 | 16.47 | 16.47 | 16.47 | 16.47 |
| 0.193 | 0.36 | 1.28 | P19426        | Negative elongation factor E                                                      | Nelfe     | 847    | 13   | 13   | 13   | 44.3 | 44.3 | 44.3 | 42.554 | 0.0000 | 99.677  | 10421000  | 71   | 15.30 | 15.86 | 15.45 | 14.88 | 13.60 | 15.89 | 16.32 |
| 0.363 | 0.36 | 1.28 | Q8K221        | Arfap2                                                                            | Arfap2    | 3642   | 4    | 4    | 4    | 15.8 | 15.8 | 15.8 | 37.772 | 0.0000 | 36.354  | 2576400   | 39   | 13.88 | 13.14 | 13.26 | 13.62 | 12.79 | 13.57 | 12.30 |
| 0.220 | 0.36 | 1.28 | Q6Q787        | Lymphocyte cytosolic protein 2                                                    | Lcp2      | 12     | 12   | 12   | 12   | 23.5 | 23.5 | 23.5 | 60.238 | 0.0000 | 32.264  | 24418000  | 189  | 15.68 | 16.01 | 16.11 | 15.94 | 14.03 | 16.04 | 16.28 |
| 0.763 | 0.36 | 1.28 | Q9R1R0        | Immunoglobulin superfamily member 8                                               | Pnma4     | 68.6   | 18   | 18   | 18   | 68.6 | 68.6 | 68.6 | 29.47  | 0.0000 | 258.47  | 69020000  | 407  | 16.58 | 16.57 | 17.73 | 17.52 | 17.73 | 17.52 | 17.28 |
| 0.639 | 0.36 | 1.28 | Q8R3K6        | Immunoglobulin superfamily member 8                                               | Igsb8     | 3838   | 6    | 6    | 6    | 12.6 | 12.6 | 12.6 | 65.01  | 0.0000 | 45.641  | 4709600   | 39   | 15.00 | 14.68 | 14.32 | 14.32 | 14.77 | 14.05 | 13.96 |
| 1.412 | 0.36 | 1.28 | Q61081        | Hsp90 co-chaperone Cdc37;Hsp90 co-chaperone Cdc37, N-terminally pro-Cdc37         | Cdc37     | 2246   | 28   | 28   | 28   | 53.8 | 53.8 | 53.8 | 44.953 | 0.0000 | 323.31  | 139300000 | 751  | 18.07 | 17.83 | 18.11 | 17.66 | 17.53 | 17.89 | 17.49 |
| 1.015 | 0.36 | 1.28 | Q61024        | Asparagine synthetase [glutamine-hydrolyzing]                                     | Asns      | 2238   | 25   | 25   | 25   | 52.4 | 52.4 | 52.4 | 64.282 | 0.0000 | 180.03  | 50549000  | 317  | 16.98 | 16.69 | 16.75 | 16.40 | 16.80 | 16.45 | 16.14 |
| 1.926 | 0.36 | 1.28 | Q8F0D5        | Cleithrin heavy chain 1                                                           | Cltc      | 2473   | 133  | 133  | 133  | 68.2 | 68.2 | 68.2 | 191.55 | 0.0000 | 323.31  | 204670000 | 5207 | 20.33 | 20.04 | 20.15 | 19.71 | 19.90 | 19.91 | 19.74 |
| 1.024 | 0.36 | 1.28 | Q8JUK7        | 28S ribosomal protein L39, mitochondrial                                          | Mps39     | 542    | 13   | 13   | 13   | 43.2 | 43.2 | 43.2 | 38.540 | 0.0000 | 90.851  | 17385000  | 210  | 15.14 | 15.05 | 15.07 | 15.14 | 15.05 | 15.14 | 14.79 |
| 0.526 | 0.36 | 1.28 | Q8C0P5        | Coronin-2A                                                                        | Coro2a    | 2416   | 14   | 14   | 13   | 28.1 | 28.1 | 26.7 | 59.573 | 0.0000 | 37.799  | 43670000  | 124  | 17.95 | 17.71 | 17.73 | 17.43 | 17.89 | 16.82 | 17.61 |
| 0.838 | 0.36 | 1.28 | Q6Z293;Q3T9E4 |                                                                                   | Tgfp1     | 1811   | 9    | 9    | 9    | 28   | 28   | 28   | 47.12  | 0.0000 | 36.638  | 11499000  | 34   | 14.06 | 14.10 | 13.80 | 13.59 | 14.01 | 13.22 | 13.68 |
| 0.980 | 0.36 | 1.28 | P49446        | Protein tyrosine-protein phosphatase epsilon                                      | Ptpe      | 1164   | 18   | 18   | 17   | 36.1 | 36.1 | 33.5 | 80.687 | 0.0000 | 130.12  | 2247900   | 258  | 16.04 | 15.80 | 16.02 | 15.31 | 15.40 | 15.76 | 15.90 |
| 0.242 | 0.36 | 1.28 | Q6JH22        | Proteoglycan endo-1                                                               | End1      | 5379   | 1    | 1    | 1    | 4.3  | 4.3  | 4.3  | 54.297 | 0.0000 | 15.397  | 2344900   | 32   | 15.23 | 14.30 | 13.61 | 15.01 | 13.24 | 13.91 | 13.68 |
| 1.877 | 0.36 | 1.28 | P35123        | Ubiquitin carboxyl-terminal hydrolase 4                                           | Usp4      | 1010   | 27   | 26   | 26   | 35.5 | 35.5 | 35.5 | 108.34 | 0.0000 | 166.72  | 73239000  | 440  | 19.08 | 18.81 | 18.90 | 18.66 | 18.69 | 18.49 | 18.46 |
| 0.426 | 0.36 | 1.28 | Q8BK77        | THO complex subunit 5 homolog                                                     | Thoc5     | 3106   | 10   | 10   | 10   | 23.6 | 23.6 | 23.6 | 78.685 | 0.0000 | 80.253  | 6657700   | 74   | 14.81 | 14.51 | 15.03 | 14.30 | 15.18 | 13.77 | 14.45 |
| 1.483 | 0.36 | 1.28 | Q9CYN2        | Signal peptidase complex subunit 2                                                | Spca2     | 4803   | 16   | 16   | 16   | 53.5 | 53.5 |      |        |        |         |           |      |       |       |       |       |       |       |       |

|       |      |      |         |                                                                              |          |      |    |    |    |      |      |      |        |        |        |           |      |       |       |       |       |       |       |       |
|-------|------|------|---------|------------------------------------------------------------------------------|----------|------|----|----|----|------|------|------|--------|--------|--------|-----------|------|-------|-------|-------|-------|-------|-------|-------|
| 0.824 | 0.33 | 1.26 | Q9DZV8  | Major facilitator superfamily domain-containing protein 10                   | Mfsd10   | 4954 | 4  | 4  | 4  | 11.4 | 11.4 | 11.4 | 49.369 | 0.0000 | 15.459 | 21375000  | 125  | 16.90 | 16.84 | 16.52 | 16.68 | 16.65 | 16.24 | 16.13 |
| 1.142 | 0.33 | 1.26 | Q8BV13  | Sorting nexin-17                                                             | Snx17    | 3244 | 16 | 16 | 16 | 43.2 | 43.2 | 43.2 | 52.797 | 0.0000 | 96.733 | 31058000  | 230  | 16.00 | 15.85 | 16.08 | 15.75 | 15.33 | 15.86 | 15.65 |
| 0.655 | 0.33 | 1.26 | Q9C244  | NSL1 cofactor p47                                                            | Nsf1p    | 4818 | 9  | 9  | 9  | 38.1 | 38.1 | 38.1 | 40.709 | 0.0000 | 67.787 | 14392000  | 120  | 16.04 | 16.46 | 16.42 | 16.35 | 15.59 | 15.79 | 16.18 |
| 0.328 | 0.33 | 1.26 | Q3J2P1  | Protein transport protein Sec24A                                             | Sec24a   | 1912 | 8  | 8  | 8  | 11.2 | 11.2 | 11.2 | 118.78 | 0.0000 | 12.422 | 5831100   | 44   | 15.19 | 14.52 | 14.72 | 14.88 | 13.51 | 14.66 | 14.88 |
| 0.512 | 0.33 | 1.26 | Q8BU30  | lamin 2                                                                      | lamin    | 3216 | 48 | 48 | 48 | 42.9 | 42.9 | 42.9 | 144.27 | 0.0000 | 323.31 | 10672000  | 753  | 17.10 | 16.82 | 16.56 | 16.16 | 16.79 | 17.10 | 17.13 |
| 0.333 | 0.33 | 1.26 | Q9WTU5  | Acyl-protein thioesterase 2                                                  | Lyp2a    | 5618 | 18 | 18 | 18 | 69.3 | 69.3 | 69.3 | 24.794 | 0.0000 | 32.331 | 215970000 | 638  | 17.29 | 17.62 | 17.55 | 16.81 | 17.55 | 17.02 | 17.25 |
| 0.378 | 0.33 | 1.26 | Q9QZV9  | NTF2-related export protein 1                                                | Nxt1     | 5608 | 2  | 2  | 2  | 25.7 | 25.7 | 25.7 | 15.847 | 0.0000 | 9.5023 | 2088000   | 25   | 14.32 | 14.09 | 14.05 | 13.45 | 13.27 | 13.91 | 14.66 |
| 0.577 | 0.33 | 1.26 | Q78IK2  | Up-regulated during skeletal muscle growth protein 5                         | Ulmg5    | 2722 | 4  | 4  | 4  | 44.8 | 44.8 | 44.8 | 6.3814 | 0.0000 | 21.442 | 12122000  | 112  | 15.71 | 15.74 | 15.73 | 15.71 | 14.74 | 15.49 | 15.64 |
| 1.285 | 0.33 | 1.26 | Q9TV4   | NADH-dependent protein Rab-14                                                | Rab14    | 4046 | 25 | 25 | 25 | 37.4 | 37.4 | 37.4 | 23.897 | 0.0000 | 323.31 | 288280000 | 900  | 19.08 | 18.93 | 19.17 | 18.60 | 19.02 | 18.64 | 18.97 |
| 0.353 | 0.33 | 1.26 | Q9WTU5  | Nuclear factor NF-kappa-B p100 subunit:Nuclear factor NF-kappa-B p52 subunit | Nfkb2    | 5618 | 22 | 22 | 22 | 35.8 | 35.8 | 35.8 | 96.831 | 0.0000 | 173.84 | 23280000  | 263  | 15.49 | 15.64 | 15.64 | 16.01 | 14.42 | 15.23 | 15.47 |
| 0.602 | 0.33 | 1.26 | Q9PD26  | GPI transamidase component PIG-S                                             | Pigs     | 2609 | 11 | 11 | 11 | 84.2 | 84.2 | 84.2 | 61.71  | 0.0000 | 11.52  | 14674000  | 108  | 15.82 | 15.91 | 15.46 | 15.88 | 15.34 | 14.95 | 15.44 |
| 0.606 | 0.33 | 1.26 | Q60634  | Flotillin-2                                                                  | Flot2    | 2187 | 21 | 21 | 21 | 52.6 | 52.6 | 52.6 | 47.037 | 0.0000 | 132.34 | 24672000  | 236  | 15.77 | 15.50 | 15.71 | 15.69 | 14.76 | 15.54 | 15.32 |
| 0.650 | 0.33 | 1.26 | Q9TVN6  | Probable ATP-dependent RNA helicase DDX41                                    | Ddx41    | 4071 | 14 | 14 | 13 | 30.9 | 30.9 | 30.9 | 69.819 | 0.0000 | 68.532 | 10557000  | 141  | 14.82 | 14.56 | 14.96 | 14.74 | 13.96 | 14.60 | 14.65 |
| 1.395 | 0.33 | 1.25 | Q9P1F5  | Serine/threonine protein phosphatase 2A 55 kDa regulatory subunit B alpha    | Ppp2r2b  | 2554 | 18 | 18 | 13 | 50.1 | 50.1 | 50.1 | 51.691 | 0.0000 | 225.67 | 60686000  | 308  | 17.32 | 17.14 | 17.17 | 16.84 | 17.16 | 16.79 | 16.76 |
| 1.084 | 0.33 | 1.25 | Q9CZU3  | Superkiller viralicidal activity 2-like 2                                    | Skiv22   | 4839 | 35 | 35 | 35 | 39.8 | 39.8 | 39.8 | 117.64 | 0.0000 | 272.84 | 56433000  | 435  | 16.67 | 16.18 | 16.58 | 16.17 | 16.31 | 16.14 | 15.97 |
| 0.853 | 0.32 | 1.25 | Q3UMR5  | Calcium uniporter protein, mitochondrial                                     | Mcu      | 2001 | 14 | 14 | 14 | 40   | 40   | 40   | 39.681 | 0.0000 | 109.93 | 24927000  | 189  | 15.86 | 15.43 | 15.62 | 15.45 | 15.24 | 14.99 | 15.58 |
| 0.310 | 0.32 | 1.25 | Q9QCQ8  | NADH dehydrogenase [ubiquinone] 1 beta subcomplex subunit 9                  | Ndubf9   | 4607 | 10 | 10 | 10 | 58.7 | 58.7 | 58.7 | 21.984 | 0.0000 | 52.294 | 18489000  | 123  | 15.56 | 15.69 | 15.74 | 15.71 | 14.25 | 15.62 | 15.78 |
| 0.200 | 0.32 | 1.25 | Q9VDP2  | UPO428 protein CXXorf5 homolog                                               | UPO428   | 2963 | 5  | 5  | 5  | 26.1 | 26.1 | 26.1 | 25.594 | 0.0000 | 10.416 | 4262000   | 66   | 14.36 | 14.64 | 14.74 | 14.45 | 12.75 | 15.22 | 14.65 |
| 0.856 | 0.32 | 1.25 | Q9BDC3  | Cap-specific mRNA (nucleoside-2'-O)-methyltransferase 1                      | Cmt1r    | 5142 | 15 | 15 | 15 | 21.1 | 21.1 | 21.1 | 95.675 | 0.0000 | 42.837 | 14891000  | 152  | 14.78 | 14.41 | 14.81 | 14.25 | 14.60 | 14.04 | 14.48 |
| 1.730 | 0.32 | 1.25 | Q89023  | Tripeptidyl-peptidase 1                                                      | Tpp1     | 596  | 8  | 8  | 8  | 23.1 | 23.1 | 23.1 | 61.341 | 0.0000 | 94.805 | 73061000  | 235  | 19.26 | 19.17 | 19.09 | 18.67 | 19.01 | 18.82 | 18.90 |
| 0.745 | 0.32 | 1.25 | Q7TMM6  | Protein Hook homolog 2                                                       | Hook2    | 2745 | 5  | 5  | 5  | 12.7 | 12.7 | 12.7 | 83.365 | 0.0000 | 32.74  | 3260400   | 26   | 13.42 | 13.39 | 13.62 | 13.62 | 13.17 | 12.85 | 12.99 |
| 1.675 | 0.32 | 1.25 | P17710  | Hexokinase-1                                                                 | Hk1      | 628  | 57 | 57 | 50 | 53.8 | 53.8 | 53.8 | 108.3  | 0.0000 | 323.31 | 27175000  | 1314 | 17.99 | 17.75 | 17.85 | 17.71 | 17.43 | 17.45 | 17.51 |
| 0.492 | 0.32 | 1.25 | Q5C263  | Uronin protein DS2                                                           | Tp52     | 2385 | 10 | 10 | 10 | 58.9 | 58.9 | 58.9 | 24.313 | 0.0000 | 193.86 | 23286000  | 216  | 15.46 | 15.79 | 15.57 | 15.90 | 15.17 | 14.76 | 15.32 |
| 1.184 | 0.32 | 1.25 | Q9CZD3  | Glycine-tRNA ligase                                                          | Gars     | 4825 | 39 | 39 | 39 | 57.3 | 57.3 | 57.3 | 81.877 | 0.0000 | 323.31 | 138380000 | 924  | 17.31 | 17.18 | 17.27 | 17.17 | 16.67 | 17.06 | 16.84 |
| 0.516 | 0.32 | 1.25 | Q8BSF4  | Phosphatidylserine decarboxylase proenzyme:Phosphatidylserine decarboxylase  | Ptdc1    | 3187 | 7  | 7  | 7  | 70.4 | 70.4 | 70.4 | 45.926 | 0.0000 | 28.85  | 4466600   | 46   | 14.48 | 14.35 | 14.55 | 13.85 | 13.72 | 14.26 | 14.75 |
| 0.681 | 0.32 | 1.25 | Q9BT73  | Ethylmalonyl-CoA decarboxylase                                               | Echdc1   | 5103 | 8  | 8  | 8  | 39.4 | 39.4 | 39.4 | 35.467 | 0.0000 | 41.455 | 5954200   | 47   | 14.73 | 15.36 | 15.36 | 14.68 | 15.12 | 14.77 | 14.55 |
| 1.521 | 0.32 | 1.25 | P46025  | Tyrosine-protein kinase SYK                                                  | Nyk      | 1139 | 46 | 46 | 45 | 73.6 | 73.6 | 73.6 | 71.376 | 0.0000 | 323.31 | 345590000 | 1232 | 18.86 | 18.57 | 18.70 | 18.63 | 15.82 | 18.73 | 18.22 |
| 1.000 | 0.32 | 1.25 | Q9QXX4  | Calcium-binding mitochondrial carrier protein Atrial2                        | Slc25a13 | 5554 | 40 | 34 | 34 | 72.6 | 66.7 | 66.7 | 74.466 | 0.0000 | 323.31 | 198520000 | 822  | 18.70 | 18.35 | 18.61 | 18.46 | 17.95 | 18.35 | 18.18 |
| 2.309 | 0.32 | 1.25 | Q99LD9  | Translation initiation factor eIF-2B subunit beta                            | Eif2b2   | 4422 | 12 | 12 | 12 | 42.7 | 42.7 | 42.7 | 38.897 | 0.0000 | 66.297 | 15680000  | 172  | 15.32 | 15.26 | 15.27 | 14.86 | 14.90 | 15.01 | 15.15 |
| 1.230 | 0.32 | 1.25 | P61027  | Ras-related protein Rab-10                                                   | Rab10    | 1366 | 15 | 14 | 13 | 60.5 | 55.5 | 55.5 | 22.541 | 0.0000 | 116.66 | 92571000  | 288  | 18.26 | 18.32 | 18.29 | 17.86 | 18.01 | 17.93 | 18.11 |
| 0.965 | 0.32 | 1.25 | Q8R021  | Wdr37-like-associated protein 1                                              | Wdr37    | 5637 | 17 | 17 | 17 | 56.7 | 56.7 | 56.7 | 36.945 | 0.0000 | 175.28 | 37072000  | 308  | 16.48 | 16.07 | 16.46 | 16.22 | 15.45 | 16.16 | 15.64 |
| 2.212 | 0.32 | 1.25 | Q9QCV8  | Actin-related protein 2/3 complex subunit 2                                  | Arpc2    | 4706 | 35 | 35 | 35 | 90.3 | 90.3 | 90.3 | 34.357 | 0.0000 | 323.31 | 464170000 | 1489 | 19.02 | 18.95 | 19.16 | 17.86 | 18.64 | 18.69 | 19.02 |
| 0.519 | 0.32 | 1.25 | Q9KU39  | Vacuolar protein sorting-associated protein 41 homolog                       | Vps41    | 2112 | 19 | 19 | 19 | 25.2 | 25.2 | 25.2 | 98.601 | 0.0000 | 61.053 | 29434000  | 254  | 17.07 | 16.86 | 16.84 | 16.75 | 15.94 | 16.95 | 16.79 |
| 0.866 | 0.32 | 1.24 | P52633  | Signal transducer and transcription activator 6                              | Stat6    | 1222 | 24 | 24 | 24 | 49.6 | 49.6 | 49.6 | 93.496 | 0.0000 | 318.97 | 36951000  | 367  | 16.44 | 16.14 | 16.26 | 15.71 | 16.29 | 15.77 | 16.09 |
| 0.706 | 0.32 | 1.24 | Q9D7N3  | Dolichylsuccinyl-CoA synthetase 1, mitochondrial                             | Hmg1     | 5035 | 10 | 10 | 10 | 31.8 | 31.8 | 31.8 | 44.926 | 0.0000 | 72.551 | 46277000  | 114  | 17.99 | 17.94 | 17.94 | 17.99 | 17.47 | 18.34 | 18.64 |
| 0.919 | 0.32 | 1.24 | P62889  | 60S ribosomal protein L30                                                    | Rpl30    | 1463 | 13 | 13 | 13 | 82.6 | 82.6 | 82.6 | 12.784 | 0.0000 | 84.226 | 227260000 | 516  | 19.50 | 19.33 | 19.30 | 18.80 | 19.41 | 19.12 | 18.91 |
| 0.388 | 0.31 | 1.24 | Q99M15  | Proline-serine-threonine phosphatase-interacting protein 2                   | Ptpn22   | 4453 | 15 | 15 | 14 | 55.4 | 55.4 | 55.4 | 38.948 | 0.0000 | 141.47 | 43607000  | 340  | 16.73 | 16.53 | 16.75 | 16.73 | 15.49 | 16.70 | 16.50 |
| 0.638 | 0.31 | 1.24 | Q8CFX1  | GDH6PGL endoplasmic bifunctional protein:Glucose 1-dehydrogenase-6-Hpdd      | Hpdd     | 3493 | 15 | 15 | 15 | 28.1 | 28.1 | 28.1 | 88.927 | 0.0000 | 147.25 | 40679000  | 240  | 18.20 | 17.84 | 17.95 | 18.15 | 17.29 | 17.72 | 17.56 |
| 0.119 | 0.31 | 1.24 | Q5Q125  | Tripartite motif-containing protein 65                                       | Trip65   | 435  | 6  | 6  | 6  | 19.7 | 19.7 | 19.7 | 33.363 | 0.0000 | 8.4139 | 4958600   | 78   | 14.12 | 14.54 | 14.71 | 16.03 | 15.47 | 15.45 | 15.48 |
| 0.257 | 0.31 | 1.24 | Q898P7  | ATP-dependent zinc metalloprotease YME1L1                                    | Yme1l1   | 589  | 20 | 20 | 20 | 33.6 | 33.6 | 33.6 | 80.027 | 0.0000 | 229.91 | 32276000  | 168  | 17.39 | 17.22 | 17.48 | 17.02 | 17.80 | 15.91 | 17.48 |
| 0.586 | 0.31 | 1.24 | P49717  | DNA replication licensing factor MCM4                                        | Mcm4     | 1168 | 30 | 30 | 30 | 36.2 | 36.2 | 36.2 | 96.735 | 0.0000 | 313.38 | 73065000  | 566  | 17.39 | 17.58 | 17.45 | 16.63 | 17.16 | 17.21 | 17.63 |
| 1.434 | 0.31 | 1.24 | Q61792  | LIM and SH3 domain protein 1                                                 | Lasp1    | 2335 | 25 | 25 | 25 | 62   | 62   | 62   | 29.994 | 0.0000 | 315.31 | 456602000 | 1129 | 19.17 | 19.20 | 19.43 | 18.97 | 18.81 | 19.15 | 18.87 |
| 1.972 | 0.31 | 1.24 | Q9JHR7  | Inulin-degrading enzyme                                                      | Ide      | 5371 | 36 | 36 | 36 | 37.7 | 37.7 | 37.7 | 117.77 | 0.0000 | 219.47 | 53079000  | 469  | 16.17 | 16.10 | 16.14 | 15.88 | 15.65 | 15.95 | 15.83 |
| 0.844 | 0.31 | 1.24 | Q9BYC6  | Nicotin                                                                      | Nicn     | 392  | 17 | 17 | 17 | 33.9 | 33.9 | 33.9 | 62.907 | 0.0000 | 181.82 | 34954000  | 303  | 16.23 | 16.63 | 16.52 | 16.43 | 15.83 | 16.35 | 16.26 |
| 1.875 | 0.31 | 1.24 | Q7TPR4  | Alpha-actinin-1                                                              | Actn1    | 2771 | 72 | 46 | 45 | 77.7 | 58.6 | 57   | 103.07 | 0.0000 | 323.31 | 225670000 | 1167 | 18.28 | 18.16 | 18.41 | 18.06 | 17.84 | 17.98 | 18.00 |
| 0.324 | 0.31 | 1.24 | Q9JHL0  | Linker for activation of T-cells family member 2                             | Ltat2    | 5367 | 4  | 4  | 4  | 30   | 30   | 30   | 22.876 | 0.0000 | 52.453 | 3040300   | 66   | 14.27 | 14.20 | 13.77 | 12.85 | 14.24 | 14.17 | 13.82 |
| 0.153 | 0.31 | 1.24 | Q9RLB0  | Deoxynucleotidyltransferase terminal-interacting protein 1                   | Dntt1p   | 4412 | 7  | 7  | 7  | 30.5 | 30.5 | 30.5 | 36.852 | 0.0000 | 57.112 | 8053800   | 70   | 14.33 | 14.71 | 15.26 | 15.27 | 17.00 | 15.38 | 14.47 |
| 0.290 | 0.31 | 1.24 | Q8BF14  | Tripartite motif-containing protein 65                                       | Trip65   | 435  | 23 | 23 | 23 | 29.5 | 29.5 | 29.5 | 58.458 | 0.0000 | 140.82 | 853400    | 68   | 15.23 | 14.90 | 14.64 | 15.32 | 13.55 | 15.04 | 14.54 |
| 1.507 | 0.31 | 1.24 | Q64324  | Syntaxin-binding protein 2                                                   | Sxbp2    | 2430 | 45 | 45 | 45 | 74.5 | 74.5 | 74.5 | 66.357 | 0.0000 | 323.31 | 216800000 | 1226 | 17.82 | 17.68 | 17.78 | 17.37 | 17.66 | 17.28 | 17.49 |
| 1.166 | 0.31 | 1.24 | Q60932  | Voltage-dependent anion-selective channel protein 1                          | Vdac1    | 2224 | 30 | 30 | 30 | 86.1 | 86.1 | 86.1 | 32.351 | 0.0000 | 323.31 | 452670000 | 1408 | 20.24 | 20.19 | 20.09 | 19.79 | 20.18 | 19.79 | 19.70 |
| 0.241 | 0.31 | 1.24 | Q91W1K1 | SPRY domain-containing protein 4                                             | Spry4    | 4115 | 5  | 5  | 5  |      |      |      |        |        |        |           |      |       |       |       |       |       |       |       |

|       |      |      |        |                                                                           |          |      |    |    |    |      |        |         |        |        |           |          |       |       |       |       |       |       |       |       |
|-------|------|------|--------|---------------------------------------------------------------------------|----------|------|----|----|----|------|--------|---------|--------|--------|-----------|----------|-------|-------|-------|-------|-------|-------|-------|-------|
| 0.617 | 0.29 | 1.22 | Q91Y78 | CSC1-like protein 1                                                       | Tmem63a  | 4180 | 7  | 7  | 7  | 11.9 | 11.9   | 11.9    | 91.859 | 0.0000 | 59.194    | 10005000 | 114   | 15.89 | 15.66 | 15.81 | 15.78 | 15.00 | 15.70 | 15.51 |
| 1.425 | 0.29 | 1.22 | Q60865 | Caprin-1                                                                  | Caprin-1 | 2215 | 14 | 14 | 14 | 26   | 26     | 26      | 78.168 | 0.0000 | 121.42    | 19608000 | 217   | 15.97 | 16.13 | 16.15 | 15.94 | 15.84 | 15.58 | 15.82 |
| 0.878 | 0.29 | 1.22 | Q35345 | Importin subunit alpha-7                                                  | Kpna6    | 360  | 15 | 15 | 11 | 40.5 | 40.5   | 33.2    | 59.964 | 0.0000 | 149.04    | 29823000 | 314   | 16.58 | 16.40 | 16.19 | 16.24 | 16.31 | 15.83 | 16.03 |
| 1.869 | 0.29 | 1.22 | P97864 | Caspase-7/Caspase-7 subunit p20/Caspase-7 subunit p11                     | Casp7    | 1681 | 5  | 5  | 5  | 18.8 | 18.8   | 18.8    | 34.06  | 0.0000 | 23.143    | 5812800  | 71    | 15.10 | 15.23 | 15.29 | 15.12 | 14.55 | 14.96 | 15.03 |
| 0.538 | 0.29 | 1.22 | Q37N45 | Protein FAM172A                                                           | Fam172a  | 1862 | 4  | 4  | 4  | 15.6 | 15.6   | 15.6    | 48.072 | 0.0000 | 15.802    | 17069000 | 14    | 13.69 | 13.69 | 13.72 | 13.78 | 13.69 | 13.72 | 13.71 |
| 0.623 | 0.29 | 1.22 | Q09159 | Lysosomal alpha-mannosidase                                               | Man2b1   | 328  | 35 | 35 | 35 | 44.6 | 44.6   | 114.65  | 0.0000 | 323.31 | 264100000 | 962      | 18.73 | 18.58 | 18.57 | 18.34 | 18.17 | 18.40 | 18.37 |       |
| 0.157 | 0.29 | 1.22 | Q8VC04 | Transmembrane protein 106A                                                | Tmem106a | 3904 | 4  | 4  | 4  | 17.6 | 17.6   | 17.6    | 29.109 | 0.0000 | 17.177    | 11122000 | 88    | 17.17 | 15.67 | 15.19 | 16.33 | 14.53 | 16.07 | 15.97 |
| 0.478 | 0.29 | 1.22 | Q8K2V7 | 39S ribosomal protein L47, mitochondrial                                  | Mrlp47   | 3678 | 8  | 8  | 8  | 32.5 | 32.5   | 32.5    | 29.725 | 0.0000 | 46.888    | 10017000 | 144   | 14.64 | 14.58 | 14.80 | 14.69 | 13.89 | 14.83 | 14.15 |
| 0.529 | 0.29 | 1.22 | P15532 | Nucleoside diphosphate kinase A                                           | Nme1     | 797  | 13 | 7  | 7  | 82.2 | 48.7   | 17.208  | 0.0000 | 33.751 | 13696000  | 276      | 19.02 | 19.24 | 19.06 | 18.48 | 19.04 | 19.22 | 19.21 |       |
| 0.460 | 0.29 | 1.22 | Q9DC90 | Peroxisomal carnitine O-acyltransferase                                   | Crot     | 518  | 12 | 12 | 11 | 58.2 | 28.1   | 70.264  | 0.0000 | 53.199 | 12076000  | 111      | 13.36 | 13.15 | 13.08 | 14.81 | 14.30 | 15.06 | 15.30 |       |
| 0.195 | 0.29 | 1.22 | Q28BM3 | Eukaryotic translation initiation factor 1A, X-chromosomal                | Efl1a    | 3141 | 11 | 2  | 2  | 61.2 | 7.6    | 16.46   | 0.0008 | 4.1678 | 2012400   | 15       | 12.07 | 14.50 | 13.03 | 13.72 | 12.78 | 12.21 | 12.94 |       |
| 0.336 | 0.29 | 1.22 | Q80XL6 | Acyl-CoA dehydrogenase family member 11                                   | Acad11   | 2885 | 10 | 10 | 10 | 18.4 | 18.4   | 87.365  | 0.0000 | 75.791 | 7086200   | 77       | 14.84 | 13.98 | 15.06 | 13.95 | 14.11 | 14.80 | 14.50 |       |
| 1.341 | 0.29 | 1.22 | Q88JY1 | 26S proteasome non-ATPase regulatory subunit 5                            | Psm5d    | 3050 | 29 | 29 | 29 | 70.2 | 70.2   | 15.971  | 0.0000 | 323.31 | 113900000 | 733      | 17.88 | 18.08 | 18.04 | 17.71 | 17.98 | 17.55 | 17.75 |       |
| 0.513 | 0.29 | 1.22 | P24389 | Peptidyl-prolyl cis-trans isomerase B                                     | Pib      | 896  | 24 | 24 | 24 | 75.9 | 75.9   | 23.715  | 0.0000 | 254.98 | 304520000 | 703      | 18.91 | 19.12 | 19.12 | 18.60 | 18.42 | 18.71 | 19.36 |       |
| 0.130 | 0.29 | 1.22 | Q64005 | PAB-dependent poly(A)-specific ribonuclease subunit PAN3                  | Pan3     | 2416 | 4  | 4  | 4  | 7    | 7      | 89.744  | 0.0000 | 12.212 | 3277200   | 45       | 14.01 | 13.64 | 14.36 | 14.63 | 11.71 | 14.31 | 14.24 |       |
| 1.741 | 0.28 | 1.22 | Q91ZJ5 | UTP-glucose-1-phosphate uridylyltransferase                               | Ugp2     | 4196 | 42 | 42 | 42 | 67.1 | 67.1   | 56.979  | 0.0000 | 323.31 | 20978000  | 1166     | 18.14 | 18.16 | 18.27 | 17.86 | 17.76 | 18.06 | 17.95 |       |
| 0.855 | 0.28 | 1.22 | Q31TH6 | Sadenosylmethionine synthase isoform type-2                               | Mat2a    | 1847 | 19 | 19 | 19 | 43.3 | 43.3   | 43.688  | 0.0000 | 107.64 | 69173000  | 374      | 17.09 | 16.88 | 17.05 | 16.88 | 16.35 | 16.76 | 16.90 |       |
| 0.436 | 0.28 | 1.22 | Q80X82 | Symplekin                                                                 | Symplek  | 2874 | 14 | 14 | 14 | 17.7 | 17.7   | 142.62  | 0.0000 | 88.8   | 10836000  | 152      | 15.29 | 15.17 | 15.22 | 14.61 | 14.50 | 15.12 | 15.54 |       |
| 0.376 | 0.28 | 1.22 | P22315 | Ferrochelatase, mitochondrial                                             | Fech     | 873  | 9  | 9  | 9  | 36.9 | 36.9   | 47.13   | 0.0000 | 81.086 | 28311000  | 300      | 15.84 | 15.46 | 15.82 | 15.87 | 15.67 | 15.47 | 14.69 |       |
| 0.688 | 0.28 | 1.22 | P68040 | Guanine nucleotide-binding protein subunit beta-2-like 1;Guanine nucleoti | Gnb2l1   | 1513 | 29 | 29 | 29 | 87.7 | 87.7   | 35.076  | 0.0000 | 323.31 | 602030000 | 1108     | 20.69 | 20.52 | 20.51 | 20.00 | 20.21 | 20.35 | 20.11 |       |
| 0.599 | 0.28 | 1.22 | P17156 | Heat shock-related 70 kDa protein 2                                       | Hspa2    | 819  | 26 | 8  | 8  | 42   | 17.5   | 19.641  | 0.0000 | 17.593 | 6599600   | 68       | 14.70 | 14.87 | 15.05 | 14.36 | 14.32 | 15.05 | 14.64 |       |
| 2.079 | 0.28 | 1.22 | Q08R10 | 116 kDa U5 small nuclear ribonucleoprotein component                      | Eftuac   | 304  | 41 | 39 | 39 | 56.6 | 55.5   | 109.36  | 0.0000 | 244.55 | 81746000  | 748      | 16.93 | 16.94 | 16.66 | 16.54 | 16.46 | 16.50 | 16.96 |       |
| 0.935 | 0.28 | 1.22 | Q8BTV2 | Cleavage and polyadenylation specificity factor subunit 7                 | Cpsf7    | 3208 | 13 | 13 | 13 | 35.7 | 35.7   | 52.01   | 0.0000 | 219.22 | 20126000  | 238      | 15.91 | 15.75 | 15.76 | 15.18 | 15.65 | 15.57 | 15.72 |       |
| 0.344 | 0.28 | 1.21 | P61965 | WD repeat-containing protein 5                                            | Wdr5     | 1395 | 13 | 13 | 13 | 54.8 | 54.8   | 36.588  | 0.0000 | 46.696 | 24148000  | 161      | 16.28 | 15.59 | 15.88 | 15.42 | 16.38 | 15.48 | 15.25 |       |
| 1.258 | 0.28 | 1.21 | Q8K207 | BRO1 domain-containing protein BROX                                       | Brox     | 3668 | 19 | 19 | 19 | 60.3 | 60.3   | 46.201  | 0.0000 | 230.61 | 69681000  | 437      | 17.72 | 17.41 | 17.33 | 17.15 | 17.24 | 17.32 | 17.12 |       |
| 0.257 | 0.28 | 1.21 | Q9P2D3 | Putative ATP-dependent RNA helicase DHX57                                 | Dhx57    | 2571 | 5  | 5  | 5  | 6.4  | 155.76 | 0.0000  | 8.7751 | 155400 | 155400000 | 27       | 13.78 | 13.78 | 13.20 | 13.78 | 13.20 | 12.75 | 13.96 |       |
| 1.291 | 0.28 | 1.21 | Q9WUJ3 | ATP-dependent 6-phosphofructokinase, platelet type                        | Pfkfb3   | 5703 | 45 | 45 | 41 | 58.3 | 58.3   | 45.454  | 0.0000 | 323.31 | 273890000 | 1452     | 18.89 | 18.89 | 18.84 | 18.87 | 18.89 | 18.84 | 18.94 |       |
| 1.636 | 0.28 | 1.21 | P05132 | cAMP-dependent protein kinase catalytic subunit alpha                     | Prkaca   | 648  | 25 | 25 | 13 | 54.7 | 54.7   | 30.2    | 40.57  | 0.0000 | 191.84    | 61700000 | 416   | 17.48 | 17.29 | 17.42 | 17.30 | 17.05 | 17.04 | 17.08 |
| 1.189 | 0.28 | 1.21 | Q91W86 | Vacuolar protein sorting-associated protein 11 homolog                    | Vps11    | 4096 | 36 | 36 | 36 | 44   | 44     | 107.72  | 0.0000 | 230.25 | 37349000  | 725      | 16.66 | 16.35 | 16.44 | 16.38 | 16.08 | 16.27 | 16.07 |       |
| 1.387 | 0.28 | 1.21 | Q9WUJ2 | Proctactin regulatory element-binding protein 1                           | Preb     | 5420 | 13 | 13 | 13 | 38.4 | 38.4   | 45.437  | 0.0000 | 190.63 | 30619000  | 289      | 16.33 | 16.20 | 16.50 | 16.04 | 16.18 | 16.14 | 15.91 |       |
| 0.208 | 0.28 | 1.21 | Q80SY3 | Viral protein ATPase subunit 2                                            | Atpv02   | 2795 | 10 | 10 | 10 | 42.3 | 42.3   | 40.492  | 0.0000 | 10.893 | 18657000  | 115      | 17.11 | 17.15 | 16.68 | 16.94 | 16.74 | 17.03 | 16.83 |       |
| 1.346 | 0.28 | 1.21 | P51660 | Peroxisomal multifunctional enzyme type 2;(3R)-hydroxyacyl-CoA dehydr     | Hsd17b4  | 1129 | 39 | 39 | 39 | 58.8 | 58.8   | 79.481  | 0.0000 | 323.31 | 242740000 | 1093     | 18.42 | 18.23 | 18.50 | 18.11 | 17.92 | 18.24 | 18.15 |       |
| 0.922 | 0.28 | 1.21 | P24063 | Integrin alpha-L                                                          | Itgal    | 894  | 34 | 34 | 34 | 30.3 | 30.3   | 128.33  | 0.0000 | 250.14 | 12600000  | 520      | 17.01 | 16.71 | 16.64 | 16.71 | 16.35 | 16.63 | 16.35 |       |
| 0.360 | 0.27 | 1.21 | P55772 | Ectonucleoside triphosphate diphosphohydrolase 1                          | Entpd1   | 1273 | 10 | 10 | 10 | 21.8 | 21.8   | 57.205  | 0.0000 | 119.19 | 24796000  | 138      | 16.50 | 16.51 | 16.41 | 16.29 | 15.47 | 16.80 | 16.22 |       |
| 0.238 | 0.27 | 1.21 | Q92R60 | 40-kDa-dependent protein kinase catalytic subunit PRKX                    | Prkx     | 4273 | 5  | 5  | 5  | 18.6 | 18.6   | 40.469  | 0.0000 | 15.585 | 33723000  | 146      | 15.72 | 15.85 | 15.82 | 15.57 | 15.42 | 15.85 | 15.91 |       |
| 0.488 | 0.27 | 1.21 | Q920F8 | Disintegrin and metalloproteinase domain-containing protein 17            | Adam17   | 5767 | 23 | 23 | 23 | 34.1 | 34.1   | 93.055  | 0.0000 | 115.64 | 32172000  | 278      | 15.86 | 15.62 | 15.80 | 15.82 | 14.89 | 15.69 | 15.55 |       |
| 1.372 | 0.27 | 1.21 | P97384 | Annexin A11                                                               | Anxa11   | 1641 | 35 | 35 | 34 | 48.9 | 48.9   | 54.079  | 0.0000 | 323.31 | 175500000 | 966      | 18.06 | 17.92 | 17.90 | 17.79 | 17.84 | 17.60 | 17.51 |       |
| 0.541 | 0.27 | 1.21 | Q91V64 | Isochorismatase domain-containing protein 1                               | Isoct1   | 4048 | 12 | 12 | 12 | 45.5 | 45.5   | 32.032  | 0.0000 | 57.412 | 34732000  | 239      | 16.71 | 16.61 | 16.62 | 16.86 | 16.06 | 16.15 | 15.99 |       |
| 0.155 | 0.27 | 1.21 | Q9V1E6 | Protein FAM108B                                                           | Fam108b  | 1115 | 6  | 6  | 6  | 11.5 | 11.5   | 109.671 | 0.0000 | 68.774 | 4682400   | 14       | 14.16 | 14.24 | 14.84 | 14.17 | 14.16 | 14.38 | 14.61 |       |
| 1.513 | 0.27 | 1.21 | Q9R0K2 | Glycogenin-1                                                              | Gygi1    | 5617 | 12 | 12 | 12 | 42   | 42     | 37.402  | 0.0000 | 264.98 | 60372000  | 313      | 17.76 | 17.70 | 17.82 | 17.60 | 17.29 | 17.47 | 17.00 |       |
| 0.662 | 0.27 | 1.21 | P50396 | Rab GDP dissociation inhibitor alpha                                      | Gdi1     | 1179 | 22 | 15 | 14 | 67.6 | 61.5   | 50.521  | 0.0000 | 142.36 | 21677000  | 170      | 15.99 | 16.04 | 15.97 | 15.87 | 15.30 | 15.68 | 16.06 |       |
| 0.384 | 0.27 | 1.21 | Q70503 | Very-long-chain 3-oxoacyl-CoA reductase                                   | Hsd17b12 | 510  | 22 | 22 | 22 | 63.5 | 63.5   | 34.741  | 0.0000 | 323.31 | 230240000 | 674      | 18.48 | 17.85 | 17.90 | 18.19 | 18.00 | 17.82 | 17.22 |       |
| 0.988 | 0.27 | 1.21 | Q98LCL | NADH dehydrogenase [ubiquinone] 1 alpha subcomplex subunit 10, mito       | Ndu10    | 4416 | 17 | 17 | 17 | 61.1 | 61.1   | 40.603  | 0.0000 | 133.08 | 44003000  | 388      | 16.22 | 15.90 | 16.19 | 16.08 | 15.78 | 15.65 | 15.83 |       |
| 0.219 | 0.27 | 1.21 | Q92Z80 | Thyrosylphosphatase D1                                                    | Ptd1     | 5733 | 14 | 14 | 14 | 15.3 | 15.3   | 123.97  | 0.0000 | 323.31 | 70289000  | 118      | 19.34 | 19.17 | 19.24 | 18.75 | 18.51 | 19.01 | 19.08 |       |
| 2.307 | 0.27 | 1.20 | Q92V4  | Phlebotropic regulator 1                                                  | Plrg1    | 487  | 18 | 18 | 18 | 48.7 | 48.7   | 56.937  | 0.0000 | 229.29 | 40336000  | 306      | 16.78 | 16.66 | 16.78 | 16.42 | 16.42 | 16.58 | 16.47 |       |
| 0.789 | 0.27 | 1.20 | Q9Z1T1 | AP-3 complex subunit beta-1                                               | Ap3b1    | 5822 | 51 | 51 | 51 | 46.3 | 46.3   | 122.74  | 0.0000 | 323.31 | 175240000 | 918      | 17.95 | 17.54 | 17.95 | 17.45 | 17.31 | 17.74 | 17.67 |       |
| 0.480 | 0.27 | 1.20 | Q70252 | Heme oxygenase 2                                                          | Hmox2    | 480  | 26 | 26 | 26 | 72.4 | 72.4   | 35.738  | 0.0000 | 323.31 | 141270000 | 702      | 17.95 | 17.66 | 17.72 | 17.93 | 17.02 | 17.71 | 17.39 |       |
| 0.882 | 0.27 | 1.20 | Q8K1Z0 | Ubiquitin carboxyl-terminal protein COO9, mitochondrial                   | Cog9     | 3623 | 8  | 8  | 8  | 34.5 | 34.5   | 35.082  | 0.0000 | 100.35 | 11241000  | 146      | 15.22 | 15.25 | 15.47 | 15.31 | 15.14 | 14.93 | 14.88 |       |
| 1.702 | 0.27 | 1.20 | Q3U7R1 | Extended synaptotagmin-1                                                  | Esy1t    | 1932 | 79 | 79 | 79 | 69.3 | 69.3   | 121.55  | 0.0000 | 323.31 | 751930000 | 2376     | 19.21 | 19.00 | 18.99 | 18.87 | 18.71 | 18.89 | 18.74 |       |
| 0.537 | 0.27 | 1.20 | Q9QWR8 | Alpha-N-acetylgalactosaminidase                                           | Naga     | 5527 | 17 | 17 | 17 | 44.8 | 44.8   | 47.234  | 0.0000 | 70.782 | 80968000  | 289      | 18.59 | 18.56 | 18.10 | 18.13 | 18.55 | 17.80 | 18.10 |       |
| 0.340 | 0.27 | 1.20 | Q9WUL7 | ADP-ribosylation factor-like protein 3                                    | Arf3     | 5714 | 7  | 7  | 7  | 53.3 | 53.3   | 20.486  | 0.0000 | 38.699 | 10340000  | 119      | 15.31 | 15.34 | 15.89 | 14.80 | 15.78 | 15.08 | 15.32 |       |
| 0.203 | 0.27 | 1.20 | Q9C1E1 | Myeloid cell nuclear differentiation antigen-like protein                 | Mndal    | 3549 | 6  | 6  | 6  | 10.9 | 10.9   | 103.68  | 0.0000 | 103.68 | 3437500   | 22       | 13.96 | 13.15 | 13.54 | 14.38 | 12.7  |       |       |       |

|       |      |      |        |                                                                              |         |      |     |     |     |      |      |       |         |        |          |           |       |       |       |       |       |       |       |       |
|-------|------|------|--------|------------------------------------------------------------------------------|---------|------|-----|-----|-----|------|------|-------|---------|--------|----------|-----------|-------|-------|-------|-------|-------|-------|-------|-------|
| 0.202 | 0.25 | 1.19 | Q8VE62 | Polyadenylate-binding protein-interacting protein 1                          | Paip1   | 3987 | 4   | 4   | 3   | 14   | 14   | 10.2  | 45.701  | 0.0000 | 18.054   | 3515800   | 32    | 14.02 | 14.63 | 14.06 | 14.21 | 12.90 | 14.65 | 14.20 |
| 0.102 | 0.25 | 1.19 | Q8JUA2 | Conserved oligomeric Golgi complex subunit 8                                 | Cog8    | 5421 | 10  | 10  | 10  | 29.2 | 29.2 | 29.2  | 71.601  | 0.0000 | 53.045   | 5428000   | 39    | 14.67 | 13.50 | 13.48 | 12.53 | 15.64 | 13.01 | 13.36 |
| 0.376 | 0.25 | 1.19 | Q55106 | Striatin                                                                     | Strn    | 454  | 20  | 20  | 19  | 47.8 | 47.8 | 46.5  | 85.965  | 0.0000 | 228.61   | 35636000  | 285   | 16.38 | 16.23 | 16.20 | 16.01 | 15.37 | 16.33 | 16.38 |
| 0.774 | 0.24 | 1.18 | Q8CGY8 | UDP-N-acetylglucosamine-peptide N-acetylglucosaminyltransferase 1110         | Ugt11   | 3514 | 36  | 36  | 36  | 42.9 | 42.9 | 42.9  | 116.95  | 0.0000 | 249.94   | 50863000  | 569   | 16.22 | 16.04 | 16.06 | 16.16 | 15.72 | 15.94 | 15.62 |
| 0.134 | 0.24 | 1.18 | Q8Q6J8 | Protein FAM162a                                                              | Fam162a | 5014 | 40  | 40  | 40  | 40   | 40   | 40    | 17.725  | 0.0000 | 32.45    | 14307000  | 64    | 15.86 | 15.99 | 15.99 | 15.86 | 14.23 | 15.99 | 15.97 |
| 0.775 | 0.24 | 1.18 | Q6Q086 | Serum paraoxonase/arylesterase 2                                             | Pon2    | 2353 | 10  | 10  | 10  | 42.7 | 42.7 | 42.7  | 39.617  | 0.0000 | 101.37   | 14071000  | 111   | 15.72 | 15.48 | 15.68 | 15.06 | 15.59 | 15.39 | 15.50 |
| 1.508 | 0.24 | 1.18 | Q921J2 | GTP-binding protein Rheb                                                     | Rheb    | 4229 | 7   | 7   | 7   | 38.6 | 38.6 | 38.6  | 20.451  | 0.0000 | 60.555   | 25755000  | 153   | 16.98 | 16.87 | 16.99 | 16.79 | 16.59 | 16.83 | 16.60 |
| 0.306 | 0.24 | 1.18 | Q8B220 | Poly [ADP-ribose] polymerase 12                                              | Parp12  | 3310 | 13  | 13  | 13  | 28.7 | 28.7 | 28.7  | 79.916  | 0.0000 | 61.12    | 11668000  | 146   | 14.62 | 14.49 | 14.44 | 14.46 | 14.63 | 13.80 | 14.00 |
| 0.087 | 0.24 | 1.18 | Q8CQF8 | Ribosomal protein 63, mitochondrial                                          | Mrp37   | 4596 | 5   | 5   | 5   | 31.4 | 31.4 | 31.4  | 11.952  | 0.0000 | 12.393   | 15959000  | 134   | 14.79 | 15.42 | 15.71 | 16.16 | 11.87 | 15.97 | 16.26 |
| 2.291 | 0.24 | 1.18 | Q9WVJ2 | 26S proteasome non-ATPase regulatory subunit 13                              | Psm13   | 5750 | 25  | 25  | 25  | 60.9 | 60.9 | 60.9  | 42.808  | 0.0000 | 323.31   | 187071000 | 480   | 17.71 | 17.77 | 17.64 | 17.61 | 17.77 | 17.61 | 17.59 |
| 1.118 | 0.24 | 1.18 | Q810B6 | Rabarinin-5                                                                  | Rabn1   | 2926 | 40  | 40  | 40  | 46.8 | 46.8 | 46.8  | 126.65  | 0.0000 | 323.31   | 113880000 | 849   | 17.01 | 16.74 | 16.90 | 16.86 | 16.57 | 16.62 | 16.56 |
| 0.792 | 0.24 | 1.18 | P70697 | Uroporphyrinogen decarboxylase                                               | Urod    | 1585 | 15  | 15  | 15  | 61   | 61   | 61    | 40.691  | 0.0000 | 170.06   | 27493000  | 191   | 16.42 | 16.11 | 16.69 | 16.18 | 16.23 | 16.17 | 16.07 |
| 0.337 | 0.24 | 1.18 | P28656 | Nucleosome assembly protein 1-like 1                                         | Nap111  | 954  | 12  | 10  | 10  | 38.1 | 35.5 | 35.5  | 45.345  | 0.0000 | 120.88   | 62330000  | 311   | 17.46 | 17.88 | 17.91 | 17.53 | 16.16 | 17.14 | 17.20 |
| 0.301 | 0.24 | 1.18 | Q91WL5 | WW domain-containing oxidoreductase                                          | Wwox    | 4119 | 3   | 3   | 3   | 9.7  | 9.7  | 9.7   | 46.512  | 0.0000 | 7.5278   | 2812300   | 34    | 13.95 | 13.14 | 14.11 | 13.98 | 13.08 | 13.41 | 13.49 |
| 0.325 | 0.24 | 1.18 | Q3TUN1 | Phosphatidate cytidyltransferase, mitochondrial                              | Tamm41  | 1876 | 8   | 8   | 8   | 36.8 | 36.8 | 36.8  | 37.827  | 0.0000 | 46.946   | 5348100   | 48    | 14.14 | 13.71 | 13.99 | 13.21 | 13.35 | 14.10 | 14.16 |
| 1.476 | 0.24 | 1.18 | Q9WUW2 | Serine/threonine-protein kinase TBK1                                         | Tbk1    | 5718 | 26  | 26  | 26  | 44   | 44   | 44    | 83.424  | 0.0000 | 291.95   | 50592000  | 365   | 16.95 | 16.69 | 16.89 | 16.65 | 16.69 | 16.57 | 16.50 |
| 0.500 | 0.24 | 1.18 | Q8B738 | Baculoviral IAP repeat-containing protein 6                                  | Birc6   | 564  | 26  | 26  | 26  | 9.5  | 9.5  | 9.5   | 532.16  | 0.0000 | 151.08   | 31252000  | 271   | 16.82 | 16.42 | 16.77 | 16.60 | 15.99 | 16.72 | 16.40 |
| 0.796 | 0.24 | 1.18 | P16025 | Cathepsin B; Cathepsin B light chain; Cathepsin B heavy chain                | Ctsb    | 724  | 23  | 23  | 23  | 62.8 | 62.8 | 62.8  | 37.279  | 0.0000 | 323.31   | 771270000 | 1555  | 20.73 | 21.02 | 21.05 | 20.49 | 20.92 | 20.57 | 20.85 |
| 0.478 | 0.24 | 1.18 | Q9WV05 | Methylthioribulose-1-phosphate dehydratase                                   | Ap1p    | 5759 | 15  | 15  | 15  | 68.5 | 68.5 | 68.5  | 26.949  | 0.0000 | 57.305   | 38741000  | 327   | 16.28 | 16.01 | 16.15 | 16.22 | 15.70 | 16.21 | 15.50 |
| 0.359 | 0.24 | 1.18 | Q8BJ48 | N-acetylglucosamine-1-phosphodiester alpha-N-acetylglucosaminidase           | Nagpa   | 3071 | 3   | 3   | 3   | 9.3  | 9.3  | 9.3   | 56.043  | 0.0000 | 10.103   | 3401100   | 18    | 14.23 | 14.21 | 13.77 | 13.19 | 14.07 | 14.07 | 14.00 |
| 1.646 | 0.24 | 1.18 | Q8BZW8 | NHL repeat-containing protein 2                                              | Nhr12   | 3320 | 9   | 9   | 9   | 19.7 | 19.7 | 19.7  | 78.429  | 0.0000 | 27.413   | 9063300   | 89    | 14.98 | 14.84 | 15.00 | 14.74 | 14.60 | 14.83 | 14.64 |
| 0.398 | 0.24 | 1.18 | P84084 | ADP-ribosylation factor 5                                                    | Arf5    | 1606 | 12  | 5   | 5   | 67.8 | 27.8 | 27.8  | 20.529  | 0.0000 | 42.167   | 30805000  | 175   | 15.28 | 17.34 | 17.79 | 16.99 | 17.91 | 17.16 | 17.26 |
| 1.007 | 0.24 | 1.18 | Q61093 | Cytochrome b-245 heavy chain                                                 | Cyb2b   | 2250 | 27  | 27  | 27  | 42.5 | 42.5 | 42.5  | 65.304  | 0.0000 | 323.31   | 334160000 | 716   | 19.43 | 19.11 | 19.43 | 19.24 | 19.13 | 18.92 | 19.00 |
| 1.050 | 0.24 | 1.18 | Q08529 | Calpain-2 catalytic subunit                                                  | Capn2   | 268  | 53  | 53  | 52  | 72.6 | 72.6 | 71.7  | 79.871  | 0.0000 | 323.31   | 244720000 | 1209  | 18.14 | 18.09 | 18.07 | 18.00 | 18.05 | 17.73 | 17.67 |
| 1.784 | 0.24 | 1.18 | Q9CQV8 | 14-3-3 protein beta/alpha; 14-3-3 protein beta/alpha, N-terminally processed | Yvhb    | 4641 | 34  | 25  | 24  | 85.4 | 81.7 | 78.9  | 28.086  | 0.0000 | 323.31   | 366100000 | 897   | 19.74 | 19.74 | 19.68 | 19.58 | 19.49 | 19.50 | 19.33 |
| 0.496 | 0.24 | 1.18 | Q70475 | UDP-glucose 6-dehydrogenase                                                  | Ugdh    | 503  | 22  | 22  | 22  | 58.6 | 58.6 | 54.83 | 22.84   | 0.0000 | 323.31   | 48681000  | 433   | 16.37 | 16.14 | 16.37 | 16.22 | 16.69 | 16.08 | 16.47 |
| 0.525 | 0.24 | 1.18 | P28459 | Phosphatidylinositol 3-kinase regulatory subunit alpha                       | Pip31   | 528  | 27  | 27  | 26  | 32.4 | 32.4 | 32.4  | 83.516  | 0.0000 | 177.47   | 47174000  | 324   | 17.02 | 17.43 | 17.68 | 17.46 | 17.57 | 17.61 | 17.59 |
| 0.213 | 0.24 | 1.18 | P04627 | Serine/threonine-protein kinase A-Raf                                        | Araf    | 643  | 11  | 7   | 6   | 25.3 | 18.2 | 15.6  | 67.581  | 0.0000 | 23.665   | 10799000  | 64    | 15.34 | 15.40 | 15.00 | 15.59 | 14.03 | 15.52 | 14.91 |
| 0.143 | 0.24 | 1.18 | Q7TS02 | RNA polymerase II subunit A C-terminal domain phosphatase                    | Ctdp1   | 2782 | 9   | 9   | 9   | 17.3 | 17.3 | 17.3  | 104.55  | 0.0000 | 72.164   | 6429000   | 92    | 14.10 | 14.40 | 13.99 | 14.21 | 14.04 | 14.50 | 14.08 |
| 1.362 | 0.24 | 1.18 | Q6S2N7 | Myoferlin                                                                    | Myfz    | 2488 | 133 | 133 | 132 | 66.4 | 66.4 | 66.4  | 233.32  | 0.0000 | 323.31   | 516740000 | 2971  | 18.27 | 18.07 | 18.24 | 18.00 | 17.84 | 18.10 | 17.89 |
| 0.242 | 0.24 | 1.18 | Q92ZK3 | RNA domain-containing adapter for CUL3-related RhoA degradation              | TRIP12  | 426  | 8   | 8   | 8   | 9.8  | 9.8  | 9.8   | 35.702  | 0.0000 | 22.504   | 2065600   | 34    | 13.61 | 13.64 | 14.15 | 13.61 | 13.64 | 13.61 | 13.61 |
| 0.482 | 0.24 | 1.18 | Q8B737 | DNA-dependent RNA polymerase II subunit RPB2                                 | Rpb2    | 3489 | 32  | 32  | 32  | 35.2 | 35.2 | 35.2  | 133.91  | 0.0000 | 291.89   | 51574000  | 558   | 16.36 | 15.98 | 16.16 | 16.32 | 15.68 | 16.09 | 15.63 |
| 0.916 | 0.24 | 1.18 | Q8BYC6 | Serine/threonine-protein kinase TAO3                                         | Tak3    | 3297 | 60  | 60  | 53  | 49   | 49   | 45.1  | 105.33  | 0.0000 | 323.31   | 105930000 | 1078  | 16.94 | 16.60 | 16.56 | 16.34 | 16.38 | 16.53 | 16.62 |
| 1.096 | 0.24 | 1.18 | Q3TX57 | 26S proteasome non-ATPase regulatory subunit 1                               | Psm1    | 1886 | 36  | 36  | 36  | 46.9 | 46.9 | 46.9  | 105.73  | 0.0000 | 323.31   | 95159000  | 834   | 16.88 | 16.60 | 16.68 | 16.46 | 16.64 | 16.31 | 16.54 |
| 0.751 | 0.23 | 1.18 | P62263 | 14-3-3 protein gamma; 14-3-3 protein gamma, N-terminally processed           | Yip6    | 136  | 21  | 21  | 21  | 96.2 | 96.2 | 96.2  | 28.302  | 0.0000 | 323.31   | 174192000 | 1256  | 20.33 | 20.32 | 20.34 | 20.33 | 20.36 | 20.34 | 20.34 |
| 1.153 | 0.23 | 1.18 | Q9JUF7 | Coatomer subunit beta                                                        | Copb1   | 5397 | 43  | 43  | 42  | 52.7 | 52.7 | 51.7  | 107.06  | 0.0000 | 323.31   | 143740000 | 870   | 18.44 | 18.37 | 18.46 | 18.24 | 18.41 | 18.07 | 18.05 |
| 0.097 | 0.23 | 1.18 | Q08997 | Copper transport protein ATOX1                                               | Atox1   | 314  | 5   | 5   | 5   | 69.1 | 69.1 | 69.1  | 7.3384  | 0.0000 | 102.72   | 33510000  | 251   | 16.17 | 16.73 | 16.85 | 17.04 | 14.18 | 16.94 | 17.24 |
| 0.111 | 0.23 | 1.17 | Q9EP53 | D-glucuronyl C5-epimerase                                                    | Glice   | 5263 | 4   | 4   | 4   | 8.1  | 8.1  | 8.1   | 70.088  | 0.0004 | 4.9685   | 146080    | 15    | 14.25 | 13.95 | 13.93 | 12.31 | 14.52 | 13.95 | 14.47 |
| 0.269 | 0.23 | 1.17 | Q92PE2 | Phospholipase-related protein 5                                              | Plp1    | 2674 | 19  | 19  | 19  | 17.1 | 17.1 | 17.1  | 203.061 | 0.0000 | 244.9400 | 60228     | 16.99 | 16.28 | 16.09 | 16.59 | 16.28 | 16.09 | 16.28 |       |
| 0.142 | 0.23 | 1.17 | Q8BJ21 | 26S ribosomal protein S35, mitochondrial                                     | Mrp35   | 3091 | 9   | 9   | 9   | 36.2 | 36.2 | 36.2  | 35.975  | 0.0000 | 64.356   | 15751000  | 119   | 15.48 | 15.71 | 15.83 | 16.22 | 13.53 | 16.14 | 15.87 |
| 0.235 | 0.23 | 1.17 | Q9CZV4 | Long-chain-fatty-acyl-CoA ligase 3                                           | Acsf3   | 4842 | 19  | 17  | 17  | 39   | 36.7 | 36.7  | 80.491  | 0.0000 | 149.27   | 20968000  | 183   | 15.65 | 15.07 | 15.40 | 15.78 | 15.56 | 14.75 | 14.50 |
| 0.704 | 0.23 | 1.17 | Q91Z15 | FYVE, RhoGEF and PH domain-containing protein 4                              | Fg4     | 4200 | 13  | 13  | 13  | 24.2 | 24.2 | 24.2  | 86.54   | 0.0000 | 69.503   | 6606400   | 93    | 14.33 | 14.15 | 14.43 | 14.01 | 14.28 | 13.76 | 14.23 |
| 0.254 | 0.23 | 1.17 | Q9EP97 | Serpin-specific protease 3                                                   | Serp3   | 5248 | 5   | 5   | 5   | 10.4 | 10.4 | 10.4  | 64.402  | 0.0000 | 15.882   | 4810800   | 73    | 14.58 | 14.44 | 14.36 | 13.64 | 15.50 | 14.44 | 13.84 |
| 0.767 | 0.23 | 1.17 | Q8B469 | Selenide water dikinase 1                                                    | Septd1  | 3017 | 12  | 12  | 12  | 46.2 | 46.2 | 46.2  | 90.96   | 0.0000 | 217.69   | 41540000  | 223   | 17.79 | 18.15 | 18.24 | 17.40 | 17.81 | 17.87 | 17.65 |
| 1.869 | 0.23 | 1.17 | P10107 | Annexin A1                                                                   | Anxa1   | 418  | 62  | 62  | 61  | 93.9 | 93.9 | 93.9  | 38.734  | 0.0000 | 323.31   | 314540000 | 3743  | 22.42 | 22.41 | 22.60 | 22.30 | 22.26 | 22.17 | 22.26 |
| 0.135 | 0.23 | 1.17 | P62075 | Mitochondrial import inner membrane translocase subunit Tim13                | Tim13   | 1402 | 3   | 3   | 3   | 53.7 | 53.7 | 53.7  | 10.458  | 0.0000 | 44.621   | 2328900   | 20    | 13.09 | 14.21 | 14.08 | 14.27 | 12.17 | 13.95 | 13.87 |
| 1.227 | 0.23 | 1.17 | P56480 | ATP synthase subunit beta, mitochondrial                                     | Atp5b   | 1288 | 41  | 41  | 41  | 86.6 | 86.6 | 86.6  | 56.3    | 0.0000 | 323.31   | 184900000 | 2950  | 21.42 | 21.60 | 21.45 | 21.24 | 21.09 | 21.41 | 21.31 |
| 0.276 | 0.23 | 1.17 | Q9EPL0 | Xylosyltransferase 2                                                         | Xylt2   | 525  | 6   | 6   | 6   | 6.4  | 6.4  | 6.4   | 96.81   | 0.0000 | 8.9232   | 308800    | 37    | 13.49 | 13.25 | 12.94 | 13.15 | 13.64 | 12.81 | 12.38 |
| 0.370 | 0.23 | 1.17 | Q8B879 | Apoptotic protease-activating factor 1                                       | Apaf1   | 582  | 28  | 28  | 28  | 27.5 | 27.5 | 27.5  | 141     | 0.0000 | 115.68   | 30372000  | 291   | 16.06 | 15.49 | 15.86 | 15.61 | 15.07 | 15.99 | 15.63 |
| 0.895 | 0.23 | 1.17 | Q90020 | Heterogeneous nuclear ribonucleoprotein A/B                                  | Hnmpab  | 4314 | 22  | 22  | 21  | 54.4 | 54.4 | 54.4  | 30.831  | 0.0000 | 20.781   | 60887000  | 411   | 17.33 | 17.65 | 17.72 | 17.23 | 17.26 | 17.50 | 17.36 |
| 0.581 | 0.23 | 1.17 | Q9WUP7 | Hydroxy carboxy-terminal hydrolase isozyme L5                                | Uchi5   |      |     |     |     |      |      |       |         |        |          |           |       |       |       |       |       |       |       |       |

|       |      |                 |                                                                                   |          |      |    |    |    |      |      |      |        |        |          |           |          |       |       |       |       |       |       |       |       |
|-------|------|-----------------|-----------------------------------------------------------------------------------|----------|------|----|----|----|------|------|------|--------|--------|----------|-----------|----------|-------|-------|-------|-------|-------|-------|-------|-------|
| 0.577 | 0.21 | 1.15 Q8C050     | Ribosomal protein S6 kinase alpha-5                                               | Rps6ka5  | 3234 | 39 | 39 | 39 | 39   | 30.9 | 30.9 | 30.9   | 96.582 | 0.0000   | 175.12    | 22607000 | 155   | 16.46 | 16.67 | 16.57 | 16.61 | 16.02 | 16.52 | 16.31 |
| 0.225 | 0.21 | 1.15 Q6DTY7     | 6-phosphofructo-2-kinase/fructose-2,6-bisphosphatase 4,6-phosphofructo            | Pfkfb4   | 2511 | 13 | 13 | 13 | 38.4 | 38.4 | 38.4 | 54.066 | 0.0000 | 87.984   | 11045000  | 115      | 14.48 | 14.05 | 14.53 | 14.60 | 14.45 | 14.23 | 13.32 |       |
| 1.035 | 0.20 | 1.15 Q9Z105     | Chloride intracellular channel protein 1                                          | Clic1    | 5818 | 24 | 24 | 24 | 79.7 | 79.7 | 79.7 | 27.013 | 0.0000 | 323.31   | 830800000 | 1199     | 21.31 | 21.05 | 21.21 | 21.15 | 20.85 | 21.01 | 20.93 |       |
| 0.515 | 0.20 | 1.15 Q9SE51     | Lipopolysaccharide-responsive and beige-like anchor protein                       | Lrba     | 5336 | 9  | 9  | 8  | 4.3  | 4.3  | 3.7  | 317.06 | 0.0000 | 14.005   | 3305400   | 62       | 14.28 | 13.78 | 14.28 | 13.92 | 14.05 | 14.03 | 13.64 |       |
| 0.601 | 0.20 | 1.15 Q9XKX3     | Cytoplasmic subunit gamma-3                                                       | Cgcp2    | 5547 | 30 | 31 | 31 | 48.7 | 48.7 | 48.7 | 97.670 | 0.0000 | 84500000 | 323.31    | 84500000 | 522   | 14.28 | 13.78 | 14.28 | 13.92 | 14.05 | 14.03 | 13.64 |
| 0.075 | 0.20 | 1.15 Q8R050.Q14 | Eukaryotic peptide chain release factor GTP-binding subunit ERF3A/Euka Gcap1/Gap2 | Cap2     | 3747 | 18 | 18 | 18 | 37.1 | 37.1 | 37.1 | 86.625 | 0.0000 | 11.277   | 48390000  | 374      | 16.53 | 16.50 | 16.82 | 16.35 | 16.13 | 16.07 | 16.51 |       |
| 0.264 | 0.20 | 1.15 P61759     | Prefoldin subunit 3                                                               | Vbp1     | 1389 | 8  | 8  | 8  | 48.5 | 48.5 | 48.5 | 22.435 | 0.0000 | 323.31   | 12554000  | 138      | 15.33 | 15.63 | 15.65 | 15.22 | 14.82 | 15.27 | 16.03 |       |
| 0.992 | 0.20 | 1.15 Q8JZ02     | AFG3-like protein 2                                                               | Afg3l2   | 3578 | 24 | 24 | 22 | 30.3 | 30.3 | 29.3 | 89.518 | 0.0000 | 94.562   | 59887000  | 328      | 16.45 | 16.21 | 16.36 | 16.24 | 16.24 | 16.12 | 15.96 |       |
| 0.136 | 0.20 | 1.15 Q9DBK9     | Ceramide synthase 5                                                               | Cers5    | 5001 | 7  | 7  | 7  | 16.2 | 16.2 | 16.2 | 48.166 | 0.0000 | 58.647   | 13843000  | 78       | 15.69 | 15.39 | 15.49 | 16.08 | 15.70 | 15.55 | 13.97 |       |
| 0.143 | 0.20 | 1.15 Q9BLJ9     | Malonyl-CoA decarboxylase, mitochondrial                                          | Mlycd    | 4323 | 3  | 3  | 3  | 10.8 | 10.8 | 10.8 | 54.735 | 0.0000 | 22.894   | 2274300   | 35       | 14.27 | 13.74 | 13.86 | 14.55 | 14.41 | 12.73 | 13.47 |       |
| 0.352 | 0.20 | 1.15 Q6Q766     | Immunity-related GTPase family M protein 1                                        | Irgm1    | 2204 | 22 | 22 | 22 | 56.5 | 56.5 | 56.5 | 46.551 | 0.0000 | 323.31   | 63359000  | 402      | 16.34 | 16.09 | 16.15 | 16.55 | 15.61 | 15.89 | 15.91 |       |
| 0.482 | 0.20 | 1.15 Q6Z418     | Drebrin-like protein                                                              | Dbrn1    | 2387 | 19 | 19 | 19 | 48.9 | 48.9 | 48.9 | 48.699 | 0.0000 | 162.64   | 5268600   | 314      | 17.68 | 18.12 | 17.97 | 17.90 | 17.80 | 17.34 | 17.84 |       |
| 0.806 | 0.20 | 1.15 Q9PLE9     | Peroxisomal acyl-coenzyme A oxidase 3                                             | Acox3    | 5260 | 31 | 31 | 31 | 54.7 | 54.7 | 54.7 | 78.403 | 0.0000 | 224.46   | 103450000 | 611      | 17.53 | 17.26 | 17.39 | 17.26 | 17.31 | 17.26 | 16.93 |       |
| 0.772 | 0.20 | 1.15 P45652     | Medium-chain specific acyl-CoA dehydrogenase, mitochondrial                       | Acad10   | 1100 | 25 | 25 | 25 | 61.5 | 61.5 | 61.5 | 45.481 | 0.0000 | 323.31   | 136340000 | 780      | 16.07 | 17.72 | 18.01 | 17.79 | 17.81 | 17.82 | 17.52 |       |
| 0.847 | 0.20 | 1.15 Q64442     | Sorbitol dehydrogenase                                                            | Sord     | 2444 | 19 | 19 | 19 | 57.4 | 57.4 | 57.4 | 38.249 | 0.0000 | 155.49   | 54868000  | 317      | 17.06 | 17.20 | 17.19 | 16.75 | 17.19 | 16.91 | 16.96 |       |
| 1.242 | 0.20 | 1.15 P35821     | Tyrosine-protein phosphatase non-receptor type 1                                  | Ptpn1    | 1033 | 24 | 24 | 24 | 63   | 63   | 63   | 49.593 | 0.0000 | 230.65   | 77658000  | 405      | 17.18 | 16.91 | 17.13 | 16.96 | 16.82 | 16.92 | 16.81 |       |
| 0.346 | 0.20 | 1.15 Q8QW54     | CAAX-prenyl protease 1 homolog                                                    | Zmpste24 | 2859 | 11 | 11 | 11 | 27.4 | 27.4 | 27.4 | 54.734 | 0.0000 | 158.58   | 50531000  | 288      | 17.23 | 16.73 | 16.80 | 17.00 | 16.27 | 16.97 | 16.64 |       |
| 0.574 | 0.20 | 1.15 Q9Z024     | B-cell receptor-associated protein 29                                             | Bcop29   | 4851 | 19 | 19 | 19 | 40.8 | 40.8 | 40.8 | 55.843 | 0.0000 | 122.81   | 66436000  | 353      | 17.35 | 17.63 | 17.62 | 17.25 | 17.38 | 17.14 | 17.36 |       |
| 0.343 | 0.20 | 1.15 Q8Z1L5     | Conserved oligomeric Golgi complex subunit 2                                      | Cog2     | 4231 | 19 | 19 | 19 | 37.6 | 37.6 | 37.6 | 82.039 | 0.0000 | 171.24   | 19232000  | 126      | 16.30 | 16.19 | 16.00 | 16.36 | 16.16 | 15.88 | 15.46 |       |
| 0.152 | 0.20 | 1.15 Q8BG01     | Spermatogenesis-defective protein 39 homolog                                      | Vpasp39  | 2987 | 10 | 10 | 10 | 27.1 | 27.1 | 27.1 | 56.624 | 0.0000 | 87.858   | 10403000  | 104      | 15.08 | 14.40 | 14.79 | 13.92 | 15.83 | 14.38 | 14.78 |       |
| 0.372 | 0.20 | 1.15 P08226     | Apolipoprotein E                                                                  | ApoE     | 2882 | 32 | 32 | 32 | 78.5 | 78.5 | 78.5 | 35.866 | 0.0000 | 323.31   | 328940000 | 943      | 18.89 | 18.32 | 18.49 | 18.38 | 17.88 | 18.70 | 18.42 |       |
| 0.689 | 0.20 | 1.15 Q9Z024     | Colicoid domain-containing protein 47                                             | Ccd47    | 4851 | 19 | 19 | 19 | 40.8 | 40.8 | 40.8 | 55.843 | 0.0000 | 122.81   | 66436000  | 353      | 17.35 | 17.63 | 17.62 | 17.25 | 17.38 | 17.14 | 17.36 |       |
| 1.102 | 0.20 | 1.14 P15460     | Argininosuccinate synthase                                                        | Ass1     | 810  | 29 | 29 | 29 | 67   | 67   | 67   | 46.584 | 0.0000 | 291.54   | 91030000  | 408      | 17.73 | 17.81 | 17.56 | 17.60 | 17.59 | 17.42 | 17.41 |       |
| 2.648 | 0.20 | 1.14 Q61035     | Histidine-tRNA ligase, cytoplasmic                                                | Hars     | 2241 | 35 | 35 | 18 | 62.5 | 62.5 | 28.7 | 57.432 | 0.0000 | 323.31   | 139270000 | 784      | 17.45 | 17.47 | 17.49 | 17.34 | 17.28 | 17.20 | 17.28 |       |
| 0.876 | 0.19 | 1.14 Q9ERE7     | LDL chaperone MED5                                                                | Medc2    | 5306 | 6  | 6  | 6  | 27.7 | 27.7 | 27.7 | 25.206 | 0.0000 | 18.488   | 9529200   | 90       | 15.25 | 15.50 | 15.38 | 15.30 | 15.06 | 15.33 | 15.04 |       |
| 0.301 | 0.19 | 1.14 Q55135     | Eukaryotic translation initiation factor 6                                        | Eif6     | 451  | 46 | 46 | 46 | 45.1 | 45.1 | 45.1 | 26.511 | 0.0000 | 243.28   | 44573700  | 79       | 17.74 | 17.33 | 17.74 | 17.74 | 16.83 | 15.72 | 16.28 |       |
| 1.504 | 0.19 | 1.14 Q9K340     | DCC-interacting protein 13-alpha                                                  | App1     | 7027 | 20 | 19 | 19 | 41.6 | 40.6 | 40.6 | 79.327 | 0.0000 | 104.42   | 21853000  | 205      | 15.81 | 15.72 | 15.85 | 15.85 | 15.66 | 15.66 | 15.66 |       |
| 0.163 | 0.19 | 1.14 P97480     | Eyes absent homolog 3                                                             | Eya3     | 1660 | 3  | 3  | 3  | 9.2  | 9.2  | 9.2  | 55.973 | 0.0000 | 23.959   | 1061500   | 20       | 13.29 | 13.25 | 13.66 | 12.90 | 13.45 | 12.37 | 14.11 |       |
| 0.140 | 0.19 | 1.14 P01942     | Hemoglobin subunit alpha                                                          | Hba      | 624  | 6  | 4  | 4  | 42.3 | 35.9 | 35.9 | 15.085 | 0.0000 | 14.277   | 11636000  | 71       | 14.59 | 14.74 | 15.79 | 14.14 | 14.54 | 14.93 | 15.77 |       |
| 0.686 | 0.19 | 1.14 Q91V92     | ATP-citrate synthase                                                              | Acly     | 4052 | 55 | 55 | 55 | 55.1 | 55.1 | 55.1 | 119.73 | 0.0000 | 323.31   | 269590000 | 1401     | 18.33 | 18.11 | 18.25 | 18.30 | 17.84 | 18.11 | 17.83 |       |
| 0.251 | 0.19 | 1.14 P21270     | Protein nucleotide-binding protein G(q) subunit alpha                             | Gnaq3    | 861  | 15 | 15 | 15 | 58.5 | 58.5 | 58.5 | 42.158 | 0.0000 | 239.18   | 64576000  | 478      | 16.74 | 16.69 | 16.33 | 16.72 | 16.46 | 16.56 | 16.39 |       |
| 0.698 | 0.19 | 1.14 Q8C854     | Myelin expression factor 2                                                        | Myef2    | 3420 | 18 | 18 | 18 | 34.9 | 34.9 | 34.9 | 63.294 | 0.0000 | 89.675   | 39833000  | 270      | 16.74 | 16.69 | 16.96 | 16.73 | 16.38 | 16.71 | 16.66 |       |
| 0.577 | 0.19 | 1.14 P63325     | 40S ribosomal protein S10                                                         | Rps10    | 1505 | 17 | 16 | 16 | 67.3 | 67.3 | 67.3 | 18.916 | 0.0000 | 107.62   | 168220000 | 491      | 18.79 | 18.84 | 18.97 | 18.71 | 18.99 | 18.40 | 18.59 |       |
| 0.708 | 0.19 | 1.14 P35486     | Pyruvate dehydrogenase E1 component subunit alpha, somatic form, mito             | Pdh1a    | 1021 | 32 | 32 | 32 | 66.7 | 66.7 | 66.7 | 43.231 | 0.0000 | 129.66   | 105090000 | 638      | 16.97 | 16.65 | 16.89 | 16.68 | 16.51 | 16.67 | 16.53 |       |
| 0.705 | 0.19 | 1.14 Q7T134     | Ubiquitin-protein phosphatase 6 regulatory subunit 1                              | Ubp2     | 2782 | 12 | 12 | 12 | 27.7 | 27.7 | 27.7 | 94.526 | 0.0000 | 89.392   | 39334000  | 71       | 14.64 | 14.21 | 14.68 | 14.21 | 14.68 | 14.21 | 14.68 |       |
| 0.833 | 0.19 | 1.14 Q9JLZ4     | Ubiquitin-conjugating enzyme E2 J1                                                | Ube2j1   | 5440 | 1  | 1  | 1  | 5.3  | 5.3  | 5.3  | 34.989 | 0.0000 | 15.298   | 2273600   | 67       | 13.93 | 14.04 | 13.94 | 13.58 | 13.94 | 13.84 | 13.63 |       |
| 0.982 | 0.19 | 1.14 Q9Z2C5     | Myotubularin                                                                      | Mtm1     | 5840 | 24 | 24 | 24 | 47.1 | 47.1 | 47.1 | 69.558 | 0.0000 | 211.67   | 27418000  | 277      | 16.07 | 15.78 | 16.01 | 15.85 | 15.77 | 15.82 | 15.62 |       |
| 1.136 | 0.19 | 1.14 Q3TKY6     | Peptidyl-prolyl cis-trans isomerase CWC27 homolog                                 | Cwc27    | 1857 | 7  | 7  | 7  | 24.3 | 24.3 | 24.3 | 53.542 | 0.0000 | 36.211   | 5516000   | 54       | 13.53 | 14.52 | 14.36 | 14.40 | 12.98 | 14.69 | 13.73 |       |
| 0.589 | 0.19 | 1.14 Q3TMK7     | Usp47-like oxidase 2                                                              | Ubox2    | 1862 | 12 | 12 | 12 | 15.3 | 15.3 | 15.3 | 77.774 | 0.0000 | 40.503   | 2543000   | 62       | 12.93 | 12.63 | 12.74 | 12.93 | 12.63 | 12.74 | 12.93 |       |
| 0.100 | 0.19 | 1.14 Q6Q597     | 2-conjugate alpha dehydrogenase, mitochondrial                                    | Ogdh     | 5212 | 54 | 54 | 54 | 52.3 | 52.3 | 52.3 | 116.45 | 0.0000 | 323.31   | 290220000 | 1381     | 18.21 | 18.06 | 18.17 | 18.01 | 17.91 | 18.04 | 17.89 |       |
| 0.311 | 0.19 | 1.14 Q6PDN3     | Myosin light chain kinase, smooth muscle/Myosin light chain kinase, smoo          | Mylik    | 2619 | 6  | 6  | 6  | 3.7  | 3.7  | 3.7  | 212.92 | 0.0027 | 2.6964   | 43962000  | 48       | 18.62 | 18.62 | 18.29 | 18.64 | 17.86 | 18.66 | 18.12 |       |
| 0.458 | 0.19 | 1.14 Q8BK67     | Receptor tyrosine kinase                                                          | Rcc2     | 3096 | 29 | 29 | 29 | 62.7 | 62.7 | 62.7 | 55.983 | 0.0000 | 178.71   | 87742000  | 617      | 17.31 | 16.82 | 17.19 | 17.07 | 16.67 | 17.14 | 16.80 |       |
| 0.325 | 0.19 | 1.14 P42267     | Epidermal growth factor receptor substrate 15                                     | Eps15    | 1080 | 13 | 13 | 13 | 24   | 24   | 24   | 98.47  | 0.0000 | 259.29   | 23019000  | 182      | 17.02 | 16.97 | 16.94 | 17.02 | 16.19 | 16.96 | 17.00 |       |
| 0.969 | 0.19 | 1.14 P31938     | Dual specificity mitogen-activated protein kinase kinase 1                        | Map2k1   | 991  | 25 | 25 | 25 | 62.8 | 62.8 | 62.8 | 43.474 | 0.0000 | 211.21   | 78235000  | 454      | 17.28 | 17.26 | 17.28 | 17.28 | 17.05 | 16.90 | 17.01 |       |
| 0.338 | 0.19 | 1.14 Q9E612     | Receptor-type tyrosine-protein phosphatase O                                      | Ptpro    | 240  | 7  | 7  | 7  | 9.3  | 9.3  | 9.3  | 138.59 | 0.0000 | 71.17    | 10602000  | 92       | 15.08 | 15.43 | 14.76 | 14.54 | 14.91 | 14.96 | 15.21 |       |
| 0.075 | 0.18 | 1.14 Q9CWL6     | Ubiquitin-cytochrome c reductase complex assembly factor 1                        | Uqccl    | 4732 | 3  | 3  | 3  | 13.2 | 13.2 | 13.2 | 34.299 | 0.0000 | 23.049   | 1295900   | 13       | 13.90 | 12.87 | 14.14 | 11.44 | 14.40 | 13.82 | 13.95 |       |
| 0.602 | 0.18 | 1.14 Q91W84     | Pleckstrin homology domain-containing family F member 2                           | Plekfr2  | 4102 | 7  | 7  | 7  | 52.6 | 52.6 | 52.6 | 27.754 | 0.0000 | 18.945   | 11794000  | 87       | 15.23 | 15.28 | 14.95 | 14.96 | 15.22 | 14.95 | 14.75 |       |
| 0.256 | 0.18 | 1.14 Q6ZV11     | Dynactin subunit 3                                                                | Dnacl    | 5792 | 13 | 12 | 12 | 61.8 | 61.8 | 61.8 | 20.970 | 0.0000 | 188.9    | 1109800   | 108      | 15.20 | 15.37 | 15.43 | 15.13 | 15.14 | 15.09 | 14.39 |       |
| 0.726 | 0.18 | 1.14 Q3JUF7     | 7-methylguanosine phosphate-specific 5-nucleotidase                               | Nt5c3b   | 1958 | 6  | 6  | 6  | 30.7 | 30.7 | 30.7 | 34.425 | 0.0000 | 105.94   | 7266300   | 131      | 14.34 | 14.53 | 14.42 | 14.02 | 14.21 | 14.26 | 14.48 |       |
| 0.146 | 0.18 | 1.14 Q6ZV07     | Myotubularin                                                                      | Sps3     | 2704 | 7  | 7  | 7  | 27.8 | 27.8 | 27.8 | 20.313 | 0.0000 | 14.097   | 18940000  | 81       | 17.46 | 16.97 | 16.35 | 17.56 | 16.09 | 17.00 | 16.32 |       |
| 0.264 | 0.18 | 1.14 Q7TQ13     | Ubiquitin thioesterase OTUB1                                                      | Otb1     | 2775 | 14 | 14 | 14 | 14.4 | 14.4 | 14.4 | 67.2   | 0.0000 | 242.89   | 44134000  | 231      | 17.03 | 17.24 | 16.94 | 17.52 | 16.90 | 16.70 | 16.44 |       |
| 0.177 | 0.18 | 1.14 Q91YF3     | Deoxyribonuclease phosphatase</                                                   |          |      |    |    |    |      |      |      |        |        |          |           |          |       |       |       |       |       |       |       |       |

|       |      |      |         |                                                                                 |          |       |    |    |      |        |        |        |          |        |          |            |       |       |       |       |         |       |       |       |
|-------|------|------|---------|---------------------------------------------------------------------------------|----------|-------|----|----|------|--------|--------|--------|----------|--------|----------|------------|-------|-------|-------|-------|---------|-------|-------|-------|
| 0.428 | 0.17 | 1.12 | P21958  | Antigen peptide transporter 1                                                   | Tap1     | 870   | 37 | 17 | 17   | 34.5   | 34.5   | 34.5   | 78.863   | 0.0000 | 323.31   | 70294000   | 326   | 16.93 | 16.59 | 16.58 | 16.87   | 16.32 | 16.53 | 16.41 |
| 0.075 | 0.17 | 1.12 | Q64010  | Adaptor molecule crk                                                            | Crk      | 2411  | 5  | 5  | 5    | 22.7   | 22.7   | 22.7   | 33.814   | 0.0000 | 18.451   | 1927800    | 17    | 12.85 | 14.13 | 14.67 | 13.20   | 14.41 | 14.83 | 12.42 |
| 0.221 | 0.17 | 1.12 | Q91XD7  | Cysteine-rich with EGF-like domain protein 1                                    | Crel1    | 4143  | 3  | 3  | 3    | 7.6    | 7.6    | 7.6    | 45.717   | 0.0000 | 29.405   | 3959200    | 41    | 14.78 | 14.10 | 14.11 | 14.41   | 13.66 | 14.53 | 14.06 |
| 0.397 | 0.17 | 1.12 | P61161  | Actin-related protein 2                                                         | Actr2    | 13722 | 45 | 45 | 44   | 80.2   | 80.2   | 80.2   | 44.76    | 0.0000 | 323.31   | 727520000  | 1648  | 20.40 | 20.25 | 20.17 | 20.38   | 19.74 | 20.29 | 20.02 |
| 0.438 | 0.17 | 1.12 | P28807  | Protein kinase C delta type/Protein kinase C delta type regulatory subunit      | Pkcδ     | 961   | 51 | 40 | 51   | 67.8   | 67.8   | 67.8   | 22.41    | 0.0000 | 22.411   | 102738000  | 1018  | 18.07 | 17.83 | 18.02 | 18.11   | 17.63 | 18.02 | 17.83 |
| 0.287 | 0.17 | 1.12 | Q96J47  | Dehydrogenase/reductase SDR family member 7B                                    | Dhrs7b   | 4325  | 10 | 10 | 10   | 36.5   | 36.5   | 36.5   | 34.086   | 0.0000 | 67.839   | 29974000   | 276   | 15.96 | 15.67 | 15.67 | 15.37   | 15.20 | 15.97 | 15.87 |
| 0.168 | 0.17 | 1.12 | Q9R117  | Non-receptor tyrosine-protein kinase TYK2                                       | Tyk2     | 5646  | 9  | 8  | 8    | 10.5   | 9.5    | 9.5    | 133.31   | 0.0000 | 11.785   | 4801600    | 41    | 13.79 | 13.25 | 14.29 | 13.86   | 13.49 | 14.08 | 12.99 |
| 1.219 | 0.16 | 1.12 | A2RSJ4  | UHRF1-binding protein 1-like                                                    | Uhrf1bp1 | 47    | 6  | 6  | 6    | 6.3    | 6.3    | 6.3    | 161.94   | 0.0000 | 13.996   | 7116000    | 49    | 15.47 | 15.46 | 15.46 | 15.36   | 15.34 | 15.38 | 15.13 |
| 0.274 | 0.16 | 1.12 | Q35075  | Down syndrome critical region protein 3 homolog                                 | Dscr3    | 333   | 6  | 6  | 6    | 30.3   | 30.3   | 30.3   | 32.97    | 0.0000 | 104.37   | 23637000   | 183   | 16.61 | 16.45 | 16.47 | 16.75   | 16.78 | 16.39 | 16.47 |
| 0.171 | 0.16 | 1.12 | Q6K496  | Exocyst complex component 3                                                     | Exoc3    | 2520  | 16 | 18 | 18   | 24.2   | 24.2   | 24.2   | 86.454   | 0.0000 | 91.653   | 13359000   | 197   | 14.44 | 14.44 | 14.04 | 15.13   | 14.65 | 15.11 | 14.60 |
| 0.185 | 0.16 | 1.12 | P62082  | 40S ribosomal protein S7                                                        | Rps7     | 14033 | 28 | 28 | 28   | 84     | 84     | 84     | 22.127   | 0.0000 | 323.31   | 873660000  | 1180  | 20.89 | 21.32 | 21.57 | 20.41   | 21.30 | 21.07 | 21.60 |
| 0.219 | 0.16 | 1.12 | Q9D106  | Endoplasmic reticulum resident protein 44                                       | Erp44    | 4933  | 13 | 13 | 13   | 36.2   | 36.2   | 36.2   | 46.852   | 0.0000 | 150.11   | 24347000   | 254   | 15.93 | 16.44 | 16.37 | 16.52   | 15.82 | 16.06 | 15.93 |
| 0.297 | 0.16 | 1.12 | P52196  | Thiosulfate sulfurtransferase                                                   | Tst      | 1213  | 6  | 6  | 6    | 25.3   | 25.3   | 25.3   | 33.466   | 0.0000 | 19.85    | 12334000   | 93    | 15.67 | 15.46 | 15.92 | 15.19   | 15.12 | 16.10 | 15.69 |
| 0.753 | 0.16 | 1.12 | P63329  | Serine/threonine-protein phosphatase 2B catalytic subunit alpha isoform         | Ptpca    | 1506  | 25 | 25 | 16   | 48.9   | 48.9   | 48.9   | 58.643   | 0.0000 | 194.84   | 62502000   | 478   | 16.78 | 16.44 | 16.53 | 16.50   | 16.51 | 16.30 | 16.37 |
| 0.423 | 0.16 | 1.12 | Q82110  | Delta-1-pyrroline-5-carboxylate synthase/Glutamate 5-kinase/Gamma-glut Aldh18a1 | Naa35    | 5795  | 28 | 28 | 28   | 45.8   | 45.8   | 45.8   | 87.265   | 0.0000 | 303.36   | 72541000   | 463   | 16.97 | 16.84 | 16.92 | 17.14   | 16.74 | 16.56 | 16.54 |
| 0.223 | 0.16 | 1.12 | Q6PH08  | N-alpha-acetyltransferase 35, Na/C auxiliary subunit                            | Comm5d   | 2641  | 11 | 11 | 11   | 20.8   | 20.8   | 20.8   | 83.305   | 0.0000 | 37.759   | 6055500    | 76    | 14.12 | 14.18 | 14.16 | 14.29   | 13.29 | 14.07 | 14.33 |
| 0.149 | 0.16 | 1.12 | Q8R395  | COMM domain-containing protein 5                                                | Comm5d   | 3839  | 5  | 5  | 5    | 27.7   | 27.7   | 27.7   | 24.493   | 0.0000 | 41.596   | 6422800    | 37    | 15.43 | 15.20 | 15.05 | 14.88   | 14.51 | 16.04 | 14.63 |
| 0.099 | 0.16 | 1.12 | Q8RG75  | Maternal-CoA-acyl carrier protein transacylase, mitochondrial                   | Mcat     | 3844  | 6  | 6  | 6    | 27     | 27     | 27     | 41.928   | 0.0000 | 47.02    | 5236200    | 65    | 15.05 | 14.64 | 14.05 | 15.27   | 14.65 | 14.57 | 13.15 |
| 0.079 | 0.16 | 1.12 | Q8PEW0  | Type I inositol 3,4-bisphosphate 4-phosphatase                                  | Inpp4a   | 5267  | 8  | 8  | 8    | 12.5   | 12.5   | 12.5   | 105.54   | 0.0000 | 32.707   | 8004700    | 73    | 15.18 | 14.07 | 14.09 | 14.36   | 15.70 | 13.03 | 14.08 |
| 0.282 | 0.16 | 1.12 | Q61037  | Tuberin                                                                         | Tsc2     | 2242  | 6  | 6  | 6    | 5.8    | 5.8    | 5.8    | 202.07   | 0.0000 | 53.43    | 5011500    | 67    | 14.63 | 14.20 | 14.07 | 13.98   | 14.47 | 14.32 | 13.79 |
| 0.226 | 0.16 | 1.12 | P62806  | Histone H4                                                                      | Hist4H4  | 1445  | 24 | 24 | 24   | 77.7   | 77.7   | 77.7   | 11.367   | 0.0000 | 323.31   | 1131000000 | 7987  | 23.62 | 24.27 | 23.78 | 23.82   | 24.17 | 23.24 | 23.68 |
| 0.065 | 0.16 | 1.12 | Q8C075  | Signal-induced proliferation-associated 1-like protein 1                        | Sipal11  | 3348  | 4  | 4  | 3    | 3.8    | 3.8    | 3.8    | 197.03   | 0.0000 | 9.859    | 1259500    | 34    | 12.45 | 12.59 | 12.12 | 12.40   | 13.37 | 10.95 | 11.80 |
| 0.188 | 0.16 | 1.12 | P101027 | Complement C3/Complement C3 beta chain/C3-beta-c/Complement C3 alpha C3         | Abcc3    | 617   | 23 | 22 | 22   | 20.4   | 20     | 18.6   | 48.000   | 0.0000 | 76.043   | 17835000   | 83    | 16.02 | 15.38 | 15.75 | 14.94   | 15.63 | 16.14 | 15.53 |
| 0.191 | 0.16 | 1.12 | B2RX12  | Canalicular multispecific organic anion transporter 2                           | Abcc3    | 82    | 17 | 15 | 15   | 18.1   | 16.7   | 16.7   | 169.22   | 0.0000 | 141.8    | 21954000   | 174   | 16.82 | 15.98 | 16.24 | 16.67   | 15.92 | 15.77 | 16.41 |
| 0.519 | 0.16 | 1.12 | Q9DB05  | Alpha-soluble NSF attachment protein                                            | Napa     | 5116  | 21 | 21 | 21   | 76.3   | 76.3   | 76.3   | 33.189   | 0.0000 | 302.15   | 19839000   | 760   | 18.53 | 18.31 | 18.26 | 18.26   | 18.41 | 18.24 | 17.93 |
| 0.150 | 0.16 | 1.12 | Q8CD33  | OWF19-like protein                                                              | Cwf19l1  | 9     | 9  | 9  | 21.8 | 21.8   | 21.8   | 60.19  | 0.0000   | 47.316 | 4772900  | 59         | 14.14 | 13.97 | 14.54 | 13.46 | 14.14   | 13.76 | 13.82 |       |
| 0.289 | 0.16 | 1.12 | Q9CQ06  | Basic leucine zipper and WD domain-containing protein 1                         | Lczw1    | 4582  | 22 | 22 | 21   | 58.7   | 48.043 | 48.043 | 277.82   | 0.0000 | 277.82   | 73777000   | 324   | 17.27 | 17.78 | 17.77 | 17.78   | 17.77 | 17.22 | 17.55 |
| 0.157 | 0.16 | 1.12 | Q6NW99  | Fibronectin type III domain-containing protein 3B                               | Fndc3b   | 2537  | 8  | 8  | 8    | 10.5   | 10.5   | 10.5   | 132.76   | 0.0000 | 38.087   | 4626500    | 40    | 13.81 | 14.24 | 13.94 | 13.84   | 13.06 | 13.88 | 14.58 |
| 0.374 | 0.16 | 1.12 | Q9WVA3  | Mitotic checkpoint protein BUB3                                                 | Bub3     | 5743  | 17 | 17 | 16   | 42.9   | 42.9   | 42.6   | 36.954   | 0.0000 | 173.92   | 51604000   | 310   | 17.56 | 17.09 | 17.32 | 17.46   | 17.17 | 17.06 | 16.91 |
| 0.779 | 0.16 | 1.12 | Q9J006  | Histone deacetylase 1                                                           | Hdac1    | 322   | 17 | 17 | 10   | 47.1   | 34.6   | 55.074 | 0.0000   | 265.86 | 11666000 | 403        | 18.66 | 18.45 | 18.46 | 18.50 | 18.44   | 18.32 | 18.20 |       |
| 0.645 | 0.16 | 1.12 | Q8C087  | Human peroxanucleotidyltransferase 3                                            | Pnc3     | 2361  | 52 | 52 | 52   | 39.251 | 39.251 | 39.251 | 108.3000 | 0.0000 | 224.9    | 110830000  | 406   | 18.97 | 18.64 | 18.68 | 18.62   | 18.46 | 18.54 | 18.46 |
| 0.108 | 0.16 | 1.12 | Q8Z321  | DNA topoisomerase 3-beta-1                                                      | Top3b    | 5878  | 7  | 7  | 6    | 12.9   | 11.6   | 96.948 | 0.0000   | 20.786 | 4533300  | 47         | 13.44 | 13.61 | 14.24 | 14.02 | 13.88   | 14.37 | 12.45 |       |
| 0.168 | 0.16 | 1.12 | Q8C0J6  | Ankyrin repeat domain-containing protein SOWAHC                                 | Sowahc   | 3339  | 8  | 8  | 8    | 21.9   | 21.9   | 21.9   | 54.937   | 0.0000 | 39.159   | 10195000   | 160   | 13.99 | 14.25 | 14.63 | 13.76   | 13.57 | 14.60 | 14.60 |
| 1.315 | 0.16 | 1.11 | P42208  | Septin-2                                                                        | Samn50   | 1074  | 24 | 24 | 24   | 71.2   | 71.2   | 71.2   | 41.525   | 0.0000 | 323.31   | 19572000   | 751   | 13.93 | 13.04 | 19.11 | 19.03   | 18.81 | 18.95 | 18.97 |
| 0.231 | 0.16 | 1.12 | Q8D071  | Mitochondrial nucleotide acision repeat protein homolog                         | Mms19    | 4853  | 12 | 12 | 12   | 20.9   | 20.9   | 20.9   | 113.09   | 0.0000 | 150.32   | 23222000   | 265   | 16.03 | 15.62 | 16.01 | 15.92   | 16.02 | 16.01 | 16.01 |
| 0.572 | 0.16 | 1.11 | Q791V5  | Mitochondrial carrier homolog 2                                                 | Mtch2    | 2743  | 14 | 14 | 14   | 50.8   | 50.8   | 50.8   | 33.490   | 0.0000 | 203.1    | 15701000   | 471   | 19.63 | 19.30 | 19.38 | 19.42   | 19.09 | 19.40 | 19.22 |
| 0.235 | 0.16 | 1.11 | Q6G705  | Phosphatidylglycerophosphatase and protein-tyrosine phosphatase 1               | Ptpn11   | 2467  | 5  | 5  | 5    | 29     | 29     | 21.942 | 0.0000   | 12.405 | 3790300  | 38         | 14.01 | 14.43 | 14.00 | 14.23 | 14.18   | 13.39 | 14.16 |       |
| 0.265 | 0.16 | 1.11 | Q8BVU0  | Leucine-rich repeat and calponin homology domain-containing protein 3           | Lrch3    | 3478  | 13 | 13 | 13   | 23.8   | 23.8   | 23.8   | 86.34    | 0.0000 | 80.364   | 15633000   | 154   | 15.42 | 15.43 | 15.73 | 15.06   | 15.67 | 15.74 | 15.01 |
| 0.351 | 0.16 | 1.11 | Q33043  | Interleukin-13 receptor 1                                                       | Il13ra1  | 195   | 19 | 19 | 19   | 39.4   | 39.4   | 39.4   | 45.05    | 0.0000 | 46.351   | 16983000   | 154   | 15.50 | 15.59 | 15.51 | 15.53   | 15.50 | 15.51 | 15.53 |
| 0.683 | 0.15 | 1.11 | Q8D0L8  | mRNA cap guanine-N7 methyltransferase                                           | Rmt1     | 4847  | 21 | 21 | 21   | 48.6   | 48.6   | 48.6   | 53.291   | 0.0000 | 215.79   | 36940000   | 347   | 16.73 | 16.42 | 16.62 | 16.49   | 16.25 | 16.56 | 16.44 |
| 0.385 | 0.15 | 1.11 | Q99KN2  | Probable cytosolic iron-sulfur protein assembly protein CIAO1                   | Ciao1    | 4385  | 9  | 9  | 9    | 32.2   | 32.2   | 32.2   | 37.632   | 0.0000 | 36.998   | 21508000   | 145   | 16.17 | 15.72 | 15.95 | 15.99   | 15.72 | 15.95 | 15.51 |
| 0.497 | 0.15 | 1.11 | Q64310  | Surfactant protein 4                                                            | Surf4    | 2428  | 7  | 7  | 7    | 28.6   | 28.6   | 28.6   | 30.381   | 0.0000 | 172.66   | 2573100    | 197   | 16.89 | 17.00 | 16.47 | 16.63   | 16.61 | 16.71 | 16.58 |
| 0.572 | 0.15 | 1.11 | Q3THK7  | GMP synthase [glutamine-hydrolyzing]                                            | Gmps     | 1846  | 30 | 30 | 30   | 58.6   | 58.6   | 58.6   | 76.723   | 0.0000 | 317.57   | 65815000   | 528   | 17.04 | 17.01 | 16.93 | 16.74   | 17.02 | 16.61 | 17.00 |
| 0.836 | 0.15 | 1.11 | Q8JHJ5  | Isocitrate dehydrogenase, mitochondrial                                         | Icdh     | 5361  | 20 | 20 | 20   | 60.1   | 60.1   | 60.1   | 46.328   | 0.0000 | 165.62   | 87453000   | 528   | 17.22 | 17.37 | 17.28 | 17.22   | 17.37 | 17.28 | 17.22 |
| 0.416 | 0.15 | 1.11 | Q9WV57  | Dual specificity mitogen-activated protein kinase kinase 5                      | Map2k5   | 5761  | 3  | 3  | 3    | 9.4    | 9.4    | 9.4    | 50.104   | 0.0000 | 11.037   | 3704400    | 47    | 13.96 | 13.86 | 14.25 | 13.92   | 14.15 | 13.69 | 13.72 |
| 0.102 | 0.15 | 1.11 | Q7TM33  | E3 ubiquitin-protein ligase UHRF2                                               | Uhrf2    | 2744  | 6  | 6  | 6    | 12.8   | 12.8   | 12.8   | 90.105   | 0.0000 | 29.682   | 8767000    | 55    | 15.55 | 15.43 | 15.54 | 15.62   | 16.17 | 14.05 | 15.58 |
| 0.473 | 0.15 | 1.11 | Q8RGH2  | Sorting and assembly machinery component 50 homolog                             | Samn50   | 2983  | 19 | 19 | 19   | 50.1   | 50.1   | 51.863 | 0.0000   | 69.963 | 39169000 | 288        | 16.28 | 16.20 | 16.13 | 15.85 | 16.38   | 16.07 | 15.93 |       |
| 1.115 | 0.15 | 1.11 | P27601  | Quanine nucleotide-binding protein subunit alpha-13                             | Gnat13   | 531   | 21 | 21 | 20   | 55.2   | 55.2   | 55.2   | 44.054   | 0.0000 | 218.56   | 11926000   | 517   | 19.71 | 19.68 | 19.68 | 19.46   | 19.39 | 19.54 | 19.47 |
| 0.226 | 0.15 | 1.11 | Q8CQD1  | Ras-related protein Rab-5A                                                      | Rab5a    | 4586  | 12 | 7  | 6    | 67     | 47.4   | 44.2   | 23.598   | 0.0000 | 83.788   | 33613000   | 191   | 17.13 | 16.92 | 17.13 | 16.28   | 17.26 | 16.94 | 17.16 |
| 0.312 | 0.15 | 1.11 | Q99K93  | Lambda-crystallin homolog                                                       | Cry1f    | 4387  | 21 | 21 | 21   | 90     | 90     | 35.208 | 0.0000   | 203.12 | 51094000 | 364        | 17.06 | 16.96 | 16.96 | 17.17 | 16.37   | 16.96 | 16.87 |       |
| 0.113 | 0.15 | 1.11 | Q63850  | Nuclear pore glycoprotein p62                                                   | Nup62    | 2406  | 3  | 3  | 3    | 7      | 7      | 7      | 53.254   | 0.0000 | 7.3605   | 1759500    | 34    | 13.76 | 13.78 | 13.83 | 14.06</ |       |       |       |

|       |      |      |            |                                                                            |                   |       |    |    |    |      |      |      |        |         |          |           |          |       |       |       |       |       |       |       |       |
|-------|------|------|------------|----------------------------------------------------------------------------|-------------------|-------|----|----|----|------|------|------|--------|---------|----------|-----------|----------|-------|-------|-------|-------|-------|-------|-------|-------|
| 0.074 | 0.13 | 1.10 | Q9DB90     | Protein SMO9                                                               | Smg9              | 5133  | 5  | 5  | 5  | 14.4 | 14.4 | 14.4 | 57.62  | 0.0000  | 31.101   | 6426200   | 63       | 15.07 | 14.73 | 15.55 | 15.70 | 13.44 | 15.39 | 15.37 |       |
| 0.116 | 0.13 | 1.10 | Q80917     | Legumain                                                                   | Lgmn              | 595   | 9  | 9  | 9  | 25.7 | 25.7 | 25.7 | 49.372 | 0.0000  | 62.071   | 10324000  | 120      | 15.03 | 15.26 | 15.05 | 15.56 | 15.24 | 15.18 | 13.95 |       |
| 0.109 | 0.13 | 1.10 | Q9CQ68     | UPF0568 protein C14orf166 homolog                                          |                   | 4591  | 12 | 12 | 12 | 54.1 | 54.1 | 54.1 | 28.352 | 0.0000  | 63.859   | 22395000  | 228      | 15.74 | 16.04 | 16.54 | 15.07 | 16.55 | 15.82 | 16.44 |       |
| 1.070 | 0.13 | 1.10 | Q921F4     | Heterogeneous nuclear ribonucleoprotein L-like                             | Hnmp1             | 23221 | 31 | 31 | 31 | 64.6 | 64.6 | 64.6 | 64.124 | 0.0000  | 289.8    | 94525000  | 709      | 17.74 | 17.60 | 17.79 | 17.54 | 17.77 | 15.56 | 17.67 |       |
| 0.479 | 0.13 | 1.10 | Q91X78     | Heat shock protein 105 kDa                                                 | Hsp101            | 4133  | 19 | 19 | 19 | 43.7 | 43.7 | 43.7 | 30.182 | 0.0005  | 65.506   | 10522000  | 349      | 15.13 | 19.45 | 19.71 | 19.61 | 19.34 | 19.31 | 19.21 |       |
| 1.805 | 0.13 | 1.10 | Q61699     | Heat shock protein 105 kDa                                                 | Hsp101            | 42325 | 45 | 45 | 45 | 61.2 | 61.2 | 61.2 | 47.3   | 0.06406 | 0.0000   | 323.31    | 63600000 | 606   | 16.44 | 16.26 | 16.34 | 16.33 | 16.06 | 16.27 | 16.21 |
| 0.755 | 0.13 | 1.10 | Q91VH6     | Protein MEMO1                                                              | Memo1             | 4062  | 12 | 12 | 12 | 63.6 | 63.6 | 63.6 | 33.692 | 0.0000  | 17.000   | 30102000  | 282      | 16.43 | 16.27 | 16.45 | 16.10 | 16.22 | 16.34 | 16.35 |       |
| 1.183 | 0.13 | 1.10 | Q9WU78     | Programmed cell death 6-interacting protein                                | Pdcd6ip           | 5698  | 76 | 76 | 76 | 74.2 | 74.2 | 74.2 | 96.023 | 0.0000  | 323.31   | 534680000 | 2218     | 18.87 | 18.73 | 18.85 | 18.70 | 18.62 | 18.78 | 18.64 |       |
| 0.390 | 0.13 | 1.10 | Q9ZDN1     | Eukaryotic translation initiation factor 2 subunit 3, X-linked             | Elf2s3x           | 5778  | 34 | 34 | 34 | 11   | 64.4 | 64.4 | 23.5   | 0.0005  | 323.31   | 223310000 | 1055     | 18.68 | 18.47 | 18.71 | 18.53 | 18.74 | 18.19 | 18.49 |       |
| 0.240 | 0.13 | 1.10 | Q8KUC3     | GDP-mannose 4-6 dehydratase                                                | Man4b             | 3603  | 16 | 16 | 16 | 54.3 | 54.3 | 54.3 | 41.984 | 0.0000  | 144.16   | 27421000  | 240      | 15.93 | 16.31 | 16.01 | 16.50 | 15.99 | 16.01 | 15.67 |       |
| 0.481 | 0.13 | 1.10 | Q3TD01     | Dolichyl-diphosphoglucosyltransferase subunit S15t3b                       | S15t3b            | 18    | 18 | 18 | 17 | 22.2 | 22.2 | 22.2 | 93.245 | 0.0000  | 69.715   | 66650000  | 262      | 18.20 | 17.95 | 18.14 | 17.89 | 17.77 | 18.19 | 18.01 |       |
| 0.690 | 0.13 | 1.10 | Q9CZW5     | Mitochondrial import receptor subunit TOM70                                | Tomm70a           | 4843  | 19 | 19 | 19 | 36.2 | 36.2 | 36.2 | 67.589 | 0.0000  | 212.27   | 29897000  | 330      | 16.14 | 15.91 | 16.10 | 16.02 | 15.86 | 16.01 | 15.79 |       |
| 0.087 | 0.13 | 1.10 | Q9JKK1     | Syntaxin-6                                                                 | Stx6              | 5453  | 5  | 5  | 5  | 27.5 | 27.5 | 27.5 | 28.996 | 0.0000  | 26.699   | 42424000  | 42       | 14.51 | 14.50 | 14.38 | 15.02 | 13.66 | 13.43 | 15.22 |       |
| 0.246 | 0.13 | 1.10 | Q9PAV2     | Probable E3 ubiquitin-protein ligase HERC4                                 | Herc4             | 2630  | 19 | 19 | 19 | 23.7 | 23.7 | 23.7 | 118.41 | 0.0000  | 92.589   | 11425000  | 125      | 15.24 | 14.92 | 15.20 | 15.20 | 15.39 | 14.72 | 14.78 |       |
| 0.306 | 0.13 | 1.10 | Q9CXY6     | Interleukin enhancer-binding factor 2                                      | Ilf2              | 4774  | 16 | 16 | 16 | 49.5 | 49.5 | 49.5 | 43.062 | 0.0000  | 107.94   | 43560000  | 283      | 17.37 | 17.44 | 17.41 | 17.50 | 17.30 | 16.85 | 17.43 |       |
| 0.295 | 0.13 | 1.10 | P17563.Q63 | Selenium-binding protein 1;Selenium-binding protein 2                      | Selenbp1;Selenbp2 | 826   | 18 | 18 | 18 | 54.9 | 54.9 | 54.9 | 52.513 | 0.0000  | 128.85   | 25034000  | 225      | 16.22 | 16.22 | 15.87 | 16.25 | 15.76 | 16.14 | 15.74 |       |
| 0.221 | 0.13 | 1.10 | P70388     | DNA repair protein RAD50                                                   | Rad50             | 1563  | 27 | 27 | 27 | 25.8 | 25.8 | 25.8 | 153.49 | 0.0000  | 184.84   | 17765000  | 238      | 15.45 | 15.25 | 15.61 | 15.60 | 14.85 | 15.61 | 15.17 |       |
| 0.176 | 0.13 | 1.10 | Q8CD10     | Calcium uptake protein 2, mitochondrial                                    | Mtcu2             | 3454  | 7  | 7  | 7  | 22.2 | 22.2 | 22.2 | 49.475 | 0.0000  | 153.4    | 5137000   | 67       | 15.13 | 15.11 | 14.85 | 15.08 | 15.43 | 14.35 | 14.65 |       |
| 0.305 | 0.13 | 1.10 | Q3JMB5     | Smith-Magenis syndrome chromosomal region candidate gene 6 protein h Smc8r | Smc8r             | 1998  | 13 | 13 | 13 | 17.6 | 17.6 | 17.6 | 104.96 | 0.0000  | 44.687   | 8543300   | 126      | 14.20 | 14.06 | 14.30 | 13.70 | 14.39 | 14.09 | 14.04 |       |
| 0.172 | 0.13 | 1.10 | Q8C104     | Conserved oligomeric Golgi complex subunit 3                               | Cog3              | 3535  | 5  | 5  | 5  | 7.8  | 7.8  | 7.8  | 93.282 | 0.0000  | 8.3602   | 3691200   | 55       | 14.47 | 13.60 | 14.36 | 14.35 | 13.62 | 14.03 | 14.06 |       |
| 0.096 | 0.13 | 1.10 | Q8K301     | Probable ATP-dependent RNA helicase DDX52                                  | Ddx52             | 3682  | 6  | 6  | 6  | 15.6 | 15.6 | 15.6 | 67.473 | 0.0000  | 83.499   | 3402800   | 34       | 13.79 | 13.88 | 13.82 | 14.27 | 14.26 | 12.52 | 13.78 |       |
| 0.556 | 0.13 | 1.10 | P14685     | 26S proteasome non-ATPase regulatory subunit 3                             | Psm3              | 784   | 39 | 39 | 39 | 60.9 | 60.9 | 60.9 | 60.718 | 0.0000  | 323.31   | 144390000 | 978      | 16.51 | 16.72 | 17.58 | 17.27 | 17.61 | 17.27 | 17.39 |       |
| 0.788 | 0.13 | 1.10 | Q9D0K2     | Succinyl-CoA:3-ketoadid coenzyme A transferase 1, mitochondrial            | Oxtc1             | 4873  | 30 | 30 | 30 | 68.1 | 68.1 | 68.1 | 55.988 | 0.0000  | 323.31   | 42075000  | 1276     | 18.76 | 18.72 | 18.55 | 18.58 | 18.60 | 18.60 | 18.40 |       |
| 0.112 | 0.13 | 1.10 | Q8BP80.Q9  | MOB kinase activator 1B;MOB kinase activator 1A                            | Mob1b;Mob1a       | 3163  | 8  | 8  | 8  | 37.5 | 37.5 | 37.5 | 25.091 | 0.0000  | 60.161   | 41792000  | 176      | 17.07 | 16.99 | 17.29 | 17.19 | 15.95 | 17.43 | 17.38 |       |
| 0.430 | 0.13 | 1.10 | Q9BLD4     | COP9 signalosome complex subunit 1                                         | Gps1              | 4420  | 27 | 27 | 27 | 58.4 | 58.4 | 58.4 | 53.442 | 0.0000  | 120.31   | 41239000  | 415      | 16.82 | 16.39 | 16.69 | 16.60 | 16.62 | 16.35 | 16.45 |       |
| 0.092 | 0.13 | 1.10 | Q9CQD3     | Poly(A)-specific ribonuclease PARN                                         | Parn              | 3951  | 6  | 6  | 6  | 16   | 16   | 16   | 71.558 | 0.0000  | 28.355   | 39860000  | 182      | 15.32 | 15.61 | 15.90 | 15.72 | 15.62 | 15.73 | 15.36 |       |
| 0.524 | 0.13 | 1.10 | Q9Z1Z2     | Serine-threonine kinase receptor-associated protein                        | Strap             | 22    | 22 | 22 | 21 | 66.6 | 66.6 | 66.6 | 38.442 | 0.0000  | 323.31   | 119450000 | 574      | 17.61 | 17.59 | 17.59 | 17.54 | 17.59 | 17.53 | 17.27 |       |
| 0.351 | 0.13 | 1.10 | Q9DBG7     | Signal recognition particle receptor subunit alpha                         | Spr               | 5154  | 22 | 22 | 22 | 45   | 45   | 45   | 69.622 | 0.0000  | 245.63   | 50959000  | 505      | 16.47 | 16.16 | 16.48 | 16.13 | 16.47 | 16.00 | 16.36 |       |
| 0.648 | 0.13 | 1.10 | Q80528     | Hexokinase-2                                                               | Hk2               | 267   | 53 | 48 | 48 | 55.7 | 53.7 | 53.7 | 102.53 | 0.0000  | 323.31   | 153570000 | 1105     | 17.51 | 17.15 | 17.30 | 17.19 | 17.17 | 19.26 | 17.14 |       |
| 0.060 | 0.13 | 1.10 | Q9CXC30    | Protein YIF1B                                                              | Yif1b             | 4745  | 5  | 5  | 5  | 35.4 | 35.4 | 35.4 | 33.982 | 0.0000  | 60.855   | 9865700   | 88       | 16.10 | 15.20 | 15.72 | 16.25 | 13.77 | 16.01 | 16.15 |       |
| 0.801 | 0.13 | 1.10 | Q9D700     | Ribose-phosphate pyrophosphokinase 1                                       | Rpps1             | 5223  | 64 | 64 | 64 | 64.8 | 64.8 | 64.8 | 34.334 | 0.0000  | 128.09   | 73032000  | 171      | 17.41 | 17.61 | 17.58 | 17.41 | 17.39 | 17.41 | 17.63 |       |
| 0.801 | 0.13 | 1.10 | Q9CXCFA    | TBC1 domain family member 15                                               | Tbcd15            | 4754  | 25 | 25 | 25 | 42.2 | 42.2 | 42.2 | 76.526 | 0.0000  | 107.65   | 38944000  | 258      | 16.67 | 16.66 | 16.63 | 16.71 | 16.48 | 16.50 | 16.42 |       |
| 0.216 | 0.13 | 1.10 | Q90489     | Cyclin-dependent kinase 18                                                 | Cdk18             | 1737  | 15 | 14 | 11 | 35.3 | 33.5 | 26.8 | 51.847 | 0.0000  | 139.42   | 17989000  | 196      | 15.66 | 15.58 | 15.80 | 15.22 | 16.07 | 15.58 | 15.34 |       |
| 0.402 | 0.12 | 1.10 | P14576     | Signal recognition particle 54 kDa protein                                 | Spr54             | 782   | 26 | 26 | 26 | 62.5 | 62.5 | 62.5 | 55.72  | 0.0000  | 260.59   | 66627000  | 462      | 17.46 | 17.22 | 17.27 | 17.46 | 17.04 | 17.25 | 17.03 |       |
| 0.207 | 0.12 | 1.10 | Q9Z1Z5     | Transferrin receptor factor alpha-induced protein 8                        | Tfrsf8            | 515   | 10 | 10 | 10 | 51.2 | 51.2 | 51.2 | 22.96  | 0.0000  | 345.4    | 42390000  | 197      | 17.40 | 17.45 | 17.45 | 16.80 | 17.45 | 17.11 | 17.50 |       |
| 0.647 | 0.12 | 1.10 | P39054     | Dynamin-2                                                                  | Dnm2              | 1051  | 52 | 52 | 38 | 55.1 | 55.1 | 44   | 98.144 | 0.0000  | 323.31   | 306160000 | 1468     | 18.83 | 18.84 | 18.90 | 18.54 | 18.83 | 18.89 | 18.86 |       |
| 0.361 | 0.12 | 1.10 | Q8BFRA     | N-acetylglucosamine-6-sulfatase                                            | Gns               | 2944  | 23 | 23 | 23 | 45.6 | 45.6 | 45.6 | 61.174 | 0.0000  | 104.34   | 101670000 | 386      | 18.35 | 18.24 | 18.27 | 18.42 | 17.93 | 18.32 | 17.98 |       |
| 0.181 | 0.12 | 1.10 | Q3TDN2     | FAS-associated factor 2                                                    | Faf2              | 1833  | 17 | 17 | 17 | 43.6 | 43.6 | 43.6 | 52.471 | 0.0000  | 290.46   | 33970000  | 301      | 16.32 | 16.02 | 15.97 | 16.11 | 16.40 | 15.40 | 16.00 |       |
| 0.087 | 0.12 | 1.10 | Q8K301     | Protein inhibitor of protein phosphatase 1                                 | Pip1r             | 214   | 21 | 21 | 21 | 21.4 | 21.4 | 21.4 | 38.527 | 0.0000  | 144.870  | 1647000   | 69       | 16.17 | 16.72 | 17.01 | 16.41 | 16.62 | 16.52 | 16.15 |       |
| 0.151 | 0.12 | 1.10 | Q9PCN47    | Hellase-like transposon factor                                             | Hell              | 2605  | 9  | 9  | 9  | 13.3 | 13.3 | 13.3 | 113.32 | 0.0000  | 28.773   | 3643500   | 29       | 13.72 | 13.06 | 13.07 | 13.57 | 12.97 | 13.30 | 13.19 |       |
| 0.115 | 0.12 | 1.10 | Q64282     | Interferon-induced protein with tetratricopeptide repeats 1                | Itf1              | 2427  | 29 | 29 | 28 | 66.1 | 66.1 | 65.9 | 53.737 | 0.0000  | 323.31   | 52123000  | 310      | 14.55 | 14.40 | 14.31 | 14.83 | 14.82 | 14.10 | 13.45 |       |
| 0.055 | 0.12 | 1.10 | Q9QXL1     | Kinesin-like protein KIF21B                                                | Kif21b            | 5545  | 11 | 11 | 11 | 10.3 | 10.3 | 10.3 | 186.18 | 0.0000  | 13.521   | 8813200   | 44       | 15.43 | 14.21 | 15.77 | 15.31 | 13.30 | 15.69 | 15.74 |       |
| 0.395 | 0.12 | 1.10 | Q9C8R2     | Mitochondrial 2-oxoglutarate/malate carrier protein                        | Slc25a11          | 4674  | 22 | 22 | 22 | 71   | 71   | 71   | 34.155 | 0.0000  | 238.4    | 138160000 | 584      | 18.47 | 18.10 | 17.96 | 18.03 | 17.96 | 18.15 | 18.09 |       |
| 0.201 | 0.12 | 1.10 | Q9CY81     | Nuclear pore membrane glycoprotein 210                                     | Nup210            | 5567  | 17 | 17 | 17 | 17.1 | 17.1 | 17.1 | 204.1  | 0.0000  | 2185.100 | 299       | 15.75    | 15.69 | 15.74 | 15.75 | 15.69 | 15.74 | 15.63 |       |       |
| 0.337 | 0.12 | 1.10 | Q9SSZ5     | Tensin-3                                                                   | Tns3              | 2141  | 40 | 40 | 37 | 48   | 46.2 | 46.2 | 155.59 | 0.0000  | 323.31   | 109350000 | 758      | 17.21 | 16.93 | 17.26 | 17.23 | 16.80 | 17.15 | 16.85 |       |
| 0.470 | 0.12 | 1.10 | P51881     | ADP/ATP translocase 2ADP/ATP translocase 2, N-terminally processed         | Slc25a5           | 1208  | 42 | 42 | 27 | 74.2 | 74.2 | 50.7 | 32.931 | 0.0000  | 323.31   | 115050000 | 1648     | 21.16 | 20.85 | 20.77 | 20.71 | 20.72 | 20.90 | 20.88 |       |
| 1.221 | 0.12 | 1.10 | P56389     | Ubiquitin carboxyl-terminal hydrolase 5                                    | Usp5              | 1286  | 48 | 48 | 48 | 66.1 | 66.1 | 66.1 | 95.832 | 0.0000  | 323.31   | 300370000 | 1217     | 19.23 | 19.27 | 19.26 | 19.15 | 19.22 | 19.02 | 19.14 |       |
| 0.519 | 0.12 | 1.10 | Q9D677     | Ubiquitin b-c1 complex subunit 2, mitochondrial                            | Ubp2c2            | 513   | 27 | 27 | 27 | 52.8 | 52.8 | 52.8 | 48.234 | 0.0000  | 323.31   | 228330000 | 865      | 19.45 | 19.32 | 19.26 | 19.34 | 19.29 | 19.19 | 19.03 |       |
| 0.311 | 0.12 | 1.10 | P25206     | DNA replication licensing factor MCM3                                      | Mcm3              | 905   | 36 | 36 | 34 | 48.8 | 48.8 | 48.8 | 91.545 | 0.0000  | 323.31   | 55428000  | 589      | 16.33 | 16.05 | 15.90 | 16.09 | 16.02 | 15.81 | 15.79 |       |
| 0.077 | 0.12 | 1.10 | Q9JUM96    | Cdo42 effector protein 4                                                   | Cdo42ep4          | 5502  | 3  | 3  | 3  | 11.5 | 11.5 | 11.5 | 37.869 | 0.0002  | 5.8993   | 1021700   | 4        | 14.59 | 13.04 | 14.62 | 13.87 | 14.76 | 13.39 | 13.83 |       |
| 0.360 | 0.12 | 1.10 | A24342</   |                                                                            |                   |       |    |    |    |      |      |      |        |         |          |           |          |       |       |       |       |       |       |       |       |

|       |      |             |                                                                         |         |       |    |    |    |       |       |       |        |        |           |           |       |       |       |       |       |       |       |       |
|-------|------|-------------|-------------------------------------------------------------------------|---------|-------|----|----|----|-------|-------|-------|--------|--------|-----------|-----------|-------|-------|-------|-------|-------|-------|-------|-------|
| 0.527 | 0.10 | 1.07 P39429 | TNF receptor-associated factor 2                                        | Traf2   | 1053  | 3  | 3  | 3  | 8.4   | 8.4   | 8.4   | 56.026 | 0.0000 | 33.883    | 9626600   | 53    | 15.93 | 15.72 | 15.63 | 15.75 | 15.61 | 15.59 | 15.67 |
| 0.227 | 0.10 | 1.07 P21995 | Emigin                                                                  | Emb     | 872   | 4  | 4  | 4  | 16.4  | 16.4  | 16.4  | 37.064 | 0.0000 | 7.2849    | 2557800   | 115   | 17.20 | 16.98 | 16.81 | 17.19 | 17.10 | 16.72 | 16.66 |
| 0.243 | 0.10 | 1.07 P57784 | U2 small nuclear ribonucleoprotein A                                    | Snrp1   | 1301  | 18 | 18 | 18 | 75.7  | 75.7  | 75.7  | 28.357 | 0.0000 | 323.31    | 38891000  | 280   | 16.56 | 16.40 | 16.29 | 16.57 | 16.26 | 15.99 | 16.45 |
| 0.074 | 0.10 | 1.07 Q9ESJ0 | Exptorin-4                                                              | Xpo4    | 4537  | 4  | 4  | 4  | 5.9   | 5.9   | 5.9   | 129.98 | 0.0000 | 16.175    | 4120400   | 48    | 14.42 | 14.57 | 14.48 | 15.11 | 14.28 | 14.84 | 13.30 |
| 0.046 | 0.10 | 1.07 Q9B673 | Long-chain-fatty-acyl-CoA ligase 4                                      | Sgk3    | 5302  | 7  | 7  | 7  | 20.6  | 20.6  | 20.6  | 57.145 | 0.0000 | 34.082    | 32371200  | 46    | 14.84 | 14.92 | 14.43 | 13.81 | 12.69 | 14.01 | 13.76 |
| 0.026 | 0.10 | 1.07 Q9CR61 | NADH dehydrogenase [ubiquinone] 1 beta subcomplex subunit 5             | Ndufb7  | 56373 | 4  | 4  | 4  | 45.3  | 45.3  | 45.3  | 16.331 | 0.0000 | 36.778    | 10209000  | 56    | 15.25 | 16.16 | 15.53 | 14.24 | 13.90 | 13.78 | 17.61 |
| 0.550 | 0.10 | 1.07 Q9ET01 | Glycogen phosphorylase, liver form                                      | Pylg    | 5353  | 66 | 66 | 54 | 74.5  | 74.5  | 64.4  | 97.462 | 0.0000 | 323.31    | 240710000 | 1362  | 17.93 | 17.65 | 17.67 | 17.66 | 17.68 | 17.68 | 17.60 |
| 0.245 | 0.10 | 1.07 E903L2 | Septin-9                                                                | Pklka   | 233   | 29 | 29 | 29 | 18.7  | 18.7  | 18.7  | 23.704 | 0.0000 | 125.64    | 27785000  | 296   | 15.47 | 14.94 | 15.24 | 15.01 | 15.32 | 15.17 | 14.98 |
| 0.350 | 0.10 | 1.07 Q9OJG5 | Uncharacterized protein C18orf8 homolog                                 | Mic1    | 2828  | 28 | 28 | 28 | 38.1  | 38.1  | 39.1  | 65.574 | 0.0000 | 323.31    | 108900000 | 709   | 17.66 | 17.81 | 17.56 | 17.55 | 17.76 | 17.30 | 17.45 |
| 0.085 | 0.09 | 1.07 Q9VC42 | AP-2 complex subunit beta                                               | Ap2b1   | 3809  | 8  | 8  | 8  | 18.6  | 18.6  | 18.6  | 74.922 | 0.0000 | 10.000    | 3094200   | 40    | 14.64 | 14.09 | 12.78 | 14.37 | 13.09 | 14.01 | 13.70 |
| 0.407 | 0.09 | 1.07 Q9OBG3 | Rootletin                                                               | Crocc   | 5151  | 51 | 51 | 28 | 55.2  | 55.2  | 36.3  | 104.58 | 0.0000 | 323.31    | 201480000 | 1114  | 17.68 | 17.35 | 17.50 | 17.53 | 17.47 | 17.33 | 17.32 |
| 0.165 | 0.09 | 1.07 Q9CJ40 | Long-chain-fatty-acyl-CoA ligase 4                                      | Acsl4   | 3566  | 6  | 6  | 6  | 3     | 3     | 3     | 226.94 | 0.0044 | 2.4043    | 121400000 | 45    | 20.28 | 20.11 | 20.55 | 20.62 | 19.85 | 20.13 | 20.28 |
| 0.559 | 0.09 | 1.07 Q9JUT7 | ATP-dependent Clp protease ATP-binding subunit clpX-like, mitochondrial | Clpx    | 5515  | 35 | 35 | 33 | 59.2  | 59.2  | 56.8  | 79.076 | 0.0000 | 253.05    | 95855000  | 645   | 17.77 | 17.38 | 17.73 | 17.73 | 17.64 | 17.59 | 17.52 |
| 0.215 | 0.09 | 1.07 Q9JH54 | Protein transport protein Sec23b                                        | Sec23b  | 5372  | 38 | 38 | 18 | 42.7  | 42.7  | 42.7  | 69.228 | 0.0000 | 120.34    | 16265000  | 262   | 14.76 | 14.43 | 14.58 | 14.83 | 14.45 | 14.49 | 14.21 |
| 0.376 | 0.09 | 1.07 Q9D662 | Serine/threonine-protein phosphatase PP1-gamma catalytic subunit        | Ppp1cc  | 4990  | 38 | 38 | 35 | 64.8  | 64.8  | 61.1  | 86.436 | 0.0000 | 323.31    | 162520000 | 948   | 17.86 | 17.77 | 17.85 | 17.59 | 17.99 | 17.70 | 17.66 |
| 0.258 | 0.09 | 1.07 P63087 | Aspartate aminotransferase, mitochondrial                               | Got2    | 1489  | 21 | 4  | 3  | 63.2  | 12.7  | 93.5  | 36.983 | 0.0000 | 27.669    | 40884000  | 133   | 17.97 | 17.68 | 17.71 | 17.94 | 17.79 | 17.54 | 17.50 |
| 0.477 | 0.09 | 1.07 P05202 | Glucosylase 2 subunit beta                                              | Ptkcsh  | 650   | 36 | 36 | 36 | 73    | 73    | 73    | 47.411 | 0.0000 | 323.31    | 431080000 | 1054  | 19.72 | 19.53 | 19.59 | 19.70 | 19.47 | 19.49 | 19.43 |
| 0.142 | 0.09 | 1.07 Q9B795 | WW domain-binding protein 4                                             | Wtp4    | 3382  | 9  | 9  | 9  | 15.4  | 15.4  | 15.4  | 58.792 | 0.0000 | 22.439    | 24852000  | 167   | 16.51 | 16.88 | 16.86 | 17.16 | 16.54 | 16.22 | 16.74 |
| 0.057 | 0.09 | 1.07 Q61048 | Phosphoglucosyltransferase 2                                            | Pgm2    | 2243  | 7  | 7  | 7  | 24.5  | 24.5  | 24.5  | 42.136 | 0.0000 | 50.369    | 84338000  | 52    | 18.81 | 20.72 | 19.98 | 20.34 | 19.09 | 19.43 | 20.00 |
| 0.342 | 0.09 | 1.07 Q7TSV4 | Maleylacetoacetate isomerase                                            | Gatz1   | 2789  | 22 | 22 | 22 | 49.2  | 49.2  | 49.2  | 68.747 | 0.0000 | 221.78    | 67493000  | 561   | 17.31 | 17.02 | 17.24 | 17.21 | 17.17 | 16.88 | 17.17 |
| 0.206 | 0.09 | 1.07 Q9WVL0 | Lipase maturation factor 2                                              | Lmf2    | 5753  | 3  | 3  | 3  | 19.4  | 19.4  | 19.4  | 24.275 | 0.0000 | 157.671   | 6381600   | 50    | 14.99 | 14.80 | 14.92 | 15.09 | 14.72 | 14.98 | 14.45 |
| 0.041 | 0.09 | 1.07 Q9C3X8 | Eukaryotic translation initiation factor 3 subunit I                    | Eif3    | 5594  | 21 | 21 | 21 | 70.5  | 70.5  | 70.5  | 36.46  | 0.0000 | 322.13    | 124840000 | 578   | 17.55 | 17.39 | 17.58 | 17.72 | 17.05 | 17.51 | 17.38 |
| 0.208 | 0.09 | 1.07 Q9OZD9 | NGFI-A-binding protein 1                                                | Nab1    | 2254  | 4  | 3  | 3  | 10.1  | 8.2   | 8.2   | 54.009 | 0.0000 | 7.6503    | 2303000   | 37    | 13.77 | 13.31 | 14.23 | 13.93 | 14.24 | 14.08 | 12.45 |
| 0.144 | 0.09 | 1.07 Q9BG32 | 26S proteasome non-ATPase regulatory subunit 11                         | Psm11   | 2962  | 34 | 34 | 34 | 78.7  | 78.7  | 78.7  | 47.436 | 0.0000 | 309.94    | 190220000 | 690   | 18.79 | 18.59 | 18.68 | 18.83 | 17.99 | 18.79 | 18.77 |
| 0.318 | 0.09 | 1.06 Q9JU77 | Pre-mRNA-processing-activating factor 8                                 | Nans    | 4330  | 73 | 73 | 73 | 43.30 | 43.30 | 43.30 | 74.024 | 0.0000 | 22.246    | 127790000 | 640   | 17.94 | 17.64 | 17.86 | 18.05 | 17.66 | 17.94 | 18.06 |
| 0.024 | 0.09 | 1.06 Q9P9V0 | 39S ribosomal protein L50, mitochondrial                                | Mrlp50  | 4518  | 63 | 63 | 82 | 41.6  | 41.6  | 41.6  | 273.61 | 0.0000 | 323.31    | 395660000 | 1195  | 21.11 | 20.69 | 20.81 | 20.97 | 20.71 | 20.98 | 20.55 |
| 0.027 | 0.09 | 1.06 Q9VD79 | H-2 class I histocompatibility antigen, K-B alpha chain                 | H2-K1   | 3972  | 3  | 3  | 3  | 27    | 27    | 27    | 18.213 | 0.0000 | 12.972    | 6894500   | 80    | 14.62 | 15.07 | 15.52 | 16.56 | 15.27 | 15.07 | 16.02 |
| 0.672 | 0.09 | 1.06 P01901 | Neurospilin-1                                                           | Nrp1    | 6222  | 17 | 15 | 5  | 42.5  | 39.8  | 15.2  | 41.301 | 0.0000 | 88.172    | 472210000 | 349   | 22.16 | 22.23 | 22.21 | 22.18 | 22.27 | 21.96 | 22.13 |
| 0.591 | 0.09 | 1.06 P97333 | Actin-related protein 2/3 complex subunit 1B                            | Arpc1b  | 1624  | 16 | 16 | 16 | 25.6  | 25.6  | 25.6  | 103    | 0.0000 | 209.55    | 23227000  | 989   | 16.41 | 15.63 | 16.20 | 16.21 | 15.59 | 16.60 | 15.57 |
| 0.658 | 0.09 | 1.06 Q9WVJ2 | Phospholipase A-2-activating protein                                    | Pla2    | 5733  | 36 | 36 | 33 | 68.3  | 68.3  | 68.3  | 10.653 | 0.0000 | 323.31    | 771640000 | 1813  | 20.93 | 20.13 | 20.05 | 20.40 | 20.14 | 20.10 | 19.96 |
| 0.082 | 0.09 | 1.06 P27612 | Alpha-1,3/1,6-mannosyltransferase ALG2                                  | Alg2    | 5146  | 15 | 15 | 15 | 45.5  | 45.5  | 45.5  | 47.404 | 0.0000 | 77.366    | 19872000  | 169   | 15.48 | 15.42 | 15.40 | 14.80 | 15.68 | 15.39 | 15.51 |
| 0.147 | 0.09 | 1.06 P05555 | Integrin alpha-M                                                        | Itga2   | 652   | 45 | 45 | 45 | 40    | 40    | 40    | 127.48 | 0.0000 | 323.31    | 243250000 | 1075  | 18.37 | 18.24 | 17.91 | 18.50 | 17.87 | 17.96 | 18.01 |
| 0.328 | 0.09 | 1.06 Q9BVF0 | Targe beta-coppeiler repeat-containing protein 1                        | Tcp1r1  | 2850  | 29 | 29 | 29 | 23.2  | 23.2  | 23.2  | 130.26 | 0.0000 | 57.631    | 19645000  | 155   | 15.82 | 15.55 | 15.65 | 15.85 | 15.62 | 15.58 | 15.66 |
| 0.275 | 0.09 | 1.06 P97452 | Ribosome biogenesis protein BOP1                                        | Bop1    | 1652  | 12 | 12 | 12 | 23.1  | 23.1  | 23.1  | 82.545 | 0.0000 | 100.51    | 14485000  | 108   | 15.24 | 15.06 | 15.16 | 15.37 | 14.99 | 15.03 | 14.89 |
| 0.172 | 0.09 | 1.06 Q9ES46 | BTB/POZ domain-containing protein KCTD12                                | Kctd12  | 5327  | 14 | 12 | 13 | 41.9  | 38.6  | 41.9  | 41.669 | 0.0000 | 82.632    | 35878000  | 187   | 17.60 | 17.47 | 17.62 | 17.13 | 17.68 | 17.31 | 17.60 |
| 0.344 | 0.09 | 1.06 Q9WVJ3 | ATP-dependent RNA helicase DDX58                                        | Ddx58   | 2667  | 17 | 17 | 16 | 55.4  | 55.4  | 55.4  | 35.892 | 0.0000 | 32.24     | 166440000 | 624   | 19.03 | 18.66 | 18.78 | 18.76 | 17.72 | 18.85 | 18.62 |
| 0.230 | 0.09 | 1.06 Q9C989 | CST complex subunit STN1                                                | Odc1    | 2658  | 47 | 47 | 47 | 57.1  | 57.1  | 57.1  | 105.97 | 0.0000 | 827.42000 | 581       | 15.83 | 15.83 | 15.83 | 15.83 | 15.83 | 15.83 | 15.83 |       |
| 0.091 | 0.08 | 1.06 Q9CPPE | NADH dehydrogenase [ubiquinone] 1 alpha subcomplex subunit 5            | Ndufa5  | 3677  | 5  | 5  | 5  | 21    | 21    | 21    | 43.485 | 0.0000 | 9.047     | 2959500   | 31    | 13.84 | 14.33 | 13.97 | 14.30 | 14.00 | 13.76 | 13.75 |
| 0.251 | 0.08 | 1.06 Q9PD05 | SWI/SNF complex subunit SMARCC2                                         | Smrcc2  | 4524  | 11 | 11 | 11 | 86.2  | 86.2  | 86.2  | 13.36  | 0.0000 | 125.51    | 16160000  | 148   | 15.58 | 15.42 | 16.40 | 15.39 | 15.88 | 15.54 | 16.06 |
| 0.091 | 0.08 | 1.06 Q9DB80 | Mitochondrial import inner membrane translocase subunit TIM50           | Tim50   | 2611  | 27 | 27 | 18 | 26.5  | 26.5  | 26.5  | 132.6  | 0.0000 | 248.55    | 53120000  | 488   | 16.69 | 16.67 | 16.95 | 16.80 | 16.61 | 16.87 | 16.46 |
| 0.222 | 0.08 | 1.06 Q9BML5 | Plectrokinin domain-containing family F member 1                        | Plekfh1 | 5053  | 18 | 18 | 18 | 38    | 38    | 38    | 39.776 | 0.0000 | 170.07    | 46372000  | 331   | 16.53 | 16.86 | 16.71 | 15.90 | 16.81 | 16.33 | 17.17 |
| 0.048 | 0.08 | 1.06 Q93T82 | Ras-related protein Rap-2c                                              | Rap2c   | 3219  | 9  | 4  | 4  | 58.5  | 29.5  | 29.5  | 20.745 | 0.0000 | 21.197    | 18982000  | 115   | 16.32 | 16.30 | 15.84 | 15.55 | 16.78 | 15.90 | 16.08 |
| 0.152 | 0.08 | 1.06 Q9BU31 | Ceramide kinase                                                         | Cerk    | 3276  | 5  | 5  | 5  | 14.3  | 14.3  | 14.3  | 13.32  | 0.0000 | 23.475    | 5035300   | 71    | 14.84 | 14.28 | 14.86 | 14.73 | 14.58 | 14.74 | 14.28 |
| 0.161 | 0.08 | 1.06 Q9BYA0 | Large neutral amino acids transporter small subunit 4                   | Tbcd    | 3295  | 21 | 21 | 21 | 24.8  | 24.8  | 24.8  | 44.8   | 0.0000 | 32.33     | 38693000  | 223   | 16.86 | 16.36 | 16.25 | 16.62 | 16.45 | 16.05 | 15.96 |
| 0.052 | 0.08 | 1.06 Q9OB93 | Calponin-2                                                              | Cnm2    | 1760  | 12 | 12 | 12 | 49.5  | 49.5  | 49.5  | 33.155 | 0.0000 | 51.134    | 24382000  | 133   | 15.65 | 16.19 | 16.64 | 14.96 | 16.80 | 15.97 | 16.80 |
| 0.082 | 0.08 | 1.06 Q9JF55 | Diphosphomevalonate decarboxylase                                       | Mvd     | 4337  | 12 | 12 | 12 | 47.4  | 47.4  | 47.4  | 44.072 | 0.0000 | 158.14    | 23278000  | 221   | 15.51 | 15.70 | 15.49 | 16.12 | 15.37 | 15.73 | 14.73 |
| 0.065 | 0.08 | 1.06 P11276 | Fibronectin-Anastellin                                                  | Fn1     | 741   | 12 | 12 | 12 | 7.1   | 7.1   | 7.1   | 272.53 | 0.0000 | 73.367    | 10080000  | 101   | 15.31 | 15.26 | 14.77 | 15.47 | 14.35 | 15.77 | 14.53 |
| 0.334 | 0.08 | 1.06 Q9ES30 | Complement C11b receptor                                                | C11orf2 | 5325  | 2  | 2  | 2  | 8.9   | 8.9   | 8.9   | 6.828  | 0.0000 | 3.5028    | 4635200   | 19    | 13.70 | 13.54 | 13.58 | 13.78 | 13.96 | 13.34 | 12.98 |
| 0.473 | 0.08 | 1.06 Q9SS44 | Active breakpoint cluster region-related protein                        | Abr     | 4462  | 26 | 26 | 26 | 51.7  | 51.7  | 51.7  | 58.841 | 0.0000 | 11.651    | 69793000  | 431   | 17.06 | 17.27 | 17.25 | 17.26 | 16.93 | 17.10 | 17.18 |
| 0.263 | 0.08 | 1.06 Q9CZN7 | Serine hydrolase                                                        | Shmt2   | 2139  | 42 | 42 | 40 | 59.1  | 59.1  | 59.1  | 97.666 | 0.0000 | 307.91    | 114430000 | 714   | 17.51 | 17.36 | 17.50 | 17.51 | 17.36 | 17.38 | 17.26 |
| 0.103 | 0.08 | 1.06 Q9DBT5 | AMP deaminase 2                                                         | Ampd2   | 4834  | 35 | 35 | 34 | 75    | 75    | 75    | 55.758 | 0.0000 | 323.31    | 169470000 | 893   | 17.96 | 17.57 | 17.73 | 17.68 | 17.48 | 17.74 | 17.79 |
| 0.128 | 0.08 | 1.06 P31725 | Kinesin light chain 4                                                   | Klc4    | 5177  | 21 | 21 | 21 | 31.5  | 31.5  | 31.5  | 92.036 | 0.0000 | 51.9      | 32680000  | 3     |       |       |       |       |       |       |       |

|       |      |      |        |                                                                                 |              |      |    |    |    |         |         |         |         |        |           |           |       |       |       |       |       |       |       |       |
|-------|------|------|--------|---------------------------------------------------------------------------------|--------------|------|----|----|----|---------|---------|---------|---------|--------|-----------|-----------|-------|-------|-------|-------|-------|-------|-------|-------|
| 0.196 | 0.06 | 1.05 | P46638 | Ras-related protein Rab-11b                                                     | Rab11b       | 1107 | 19 | 19 | 4  | 70.6    | 70.6    | 17.9    | 24.489  | 0.0000 | 206.12    | 207410000 | 471   | 19.16 | 18.90 | 18.80 | 18.99 | 19.02 | 18.88 | 18.67 |
| 0.072 | 0.06 | 1.05 | Q9D0F3 | Protein ERGIC-53                                                                | Lman1        | 4862 | 14 | 14 | 14 | 30.9    | 30.9    | 30.9    | 57.788  | 0.0000 | 140.13    | 47630000  | 208   | 16.75 | 16.36 | 16.99 | 16.79 | 15.77 | 16.91 | 16.55 |
| 0.058 | 0.06 | 1.04 | Q9GLD0 | Ubiquitin carboxyl-terminal hydrolase 16                                        | Usp16        | 4426 | 5  | 5  | 5  | 8.6     | 8.6     | 8.6     | 93.433  | 0.0000 | 9.0463    | 3548200   | 21    | 13.94 | 13.92 | 14.64 | 14.24 | 14.55 | 13.33 | 14.19 |
| 0.092 | 0.06 | 1.04 | Q9Z1D1 | Eukaryotic translation initiation factor 3 subunit G                            | Elf3g        | 5804 | 11 | 11 | 11 | 11      | 40.6    | 40.6    | 35.638  | 0.0000 | 83.783    | 28575000  | 228   | 16.20 | 16.94 | 16.79 | 16.35 | 16.32 | 16.81 | 16.79 |
| 0.178 | 0.06 | 1.04 | Q9ZB51 | Transmembrane protein 43                                                        | Tmem43       | 5177 | 24 | 24 | 24 | 63.55   | 63.55   | 44.783  | 0.0000  | 32.331 | 124620000 | 37        | 17.65 | 17.65 | 17.45 | 17.68 | 16.97 | 17.45 | 17.49 |       |
| 0.028 | 0.06 | 1.04 | Q3ZNV4 | Metal transporter CNNM3                                                         | Cnnm3        | 5807 | 5  | 5  | 5  | 12.8    | 12.8    | 12.8    | 76.278  | 0.0000 | 16.856    | 3789700   | 57    | 14.76 | 13.92 | 12.76 | 14.04 | 14.13 | 14.50 | 12.35 |
| 0.048 | 0.06 | 1.04 | Q9DM43 | Mitochondrial glutamate carrier 1                                               | Slc25a22     | 5003 | 5  | 5  | 9  | 38.1    | 38.1    | 31.6    | 34.67   | 0.0000 | 31.752    | 16268000  | 98    | 15.59 | 15.20 | 15.52 | 14.34 | 15.47 | 15.65 | 16.04 |
| 0.029 | 0.06 | 1.04 | Q6Q477 | Calcium-transporting ATPase                                                     | Atp2b4       | 2649 | 19 | 6  | 6  | 21.2    | 38.1    | 9.1     | 133.07  | 0.0000 | 15.28     | 3899500   | 31    | 13.81 | 13.65 | 14.12 | 14.38 | 14.43 | 14.39 | 11.98 |
| 0.177 | 0.06 | 1.04 | P18125 | L-lactate dehydrogenase B chain                                                 | Ldhb         | 806  | 16 | 14 | 14 | 54.2    | 48.7    | 46.7    | 36.572  | 0.0000 | 34.54     | 34373000  | 276   | 16.24 | 15.89 | 16.18 | 16.08 | 15.80 | 16.17 | 16.11 |
| 0.222 | 0.06 | 1.04 | Q9EPJ0 | Regulator of nonsense transcripts 1                                             | Ufl1f        | 5264 | 44 | 44 | 44 | 48.6    | 48.6    | 48.6    | 123.97  | 0.0000 | 323.31    | 108270000 | 805   | 17.16 | 16.83 | 17.08 | 17.11 | 16.83 | 17.00 | 16.92 |
| 0.162 | 0.06 | 1.04 | Q8R3D1 | TBC1 domain family member 13                                                    | Tbcl13       | 3842 | 11 | 11 | 11 | 39.8    | 39.8    | 39.8    | 46.452  | 0.0000 | 47.531    | 405510000 | 206   | 16.61 | 16.20 | 16.35 | 16.39 | 16.37 | 16.07 | 16.46 |
| 0.254 | 0.06 | 1.04 | Q9QL45 | Eukaryotic translation initiation factor 2 subunit 2                            | Elf2a2       | 4408 | 22 | 22 | 21 | 50.2    | 46.2    | 46.2    | 38.092  | 0.0000 | 123.13    | 75039000  | 517   | 16.84 | 16.74 | 16.85 | 16.82 | 16.91 | 16.70 | 16.98 |
| 0.282 | 0.06 | 1.04 | P51807 | Dynem light chain Tctex-type 1                                                  | Dynt1        | 1202 | 4  | 4  | 4  | 49.6    | 49.6    | 49.6    | 12.483  | 0.0000 | 281.73    | 20244000  | 150   | 16.63 | 16.41 | 16.62 | 16.67 | 16.41 | 16.47 | 16.42 |
| 0.097 | 0.06 | 1.04 | Q9PGL7 | WASH complex subunit FAM21                                                      | Fam21        | 2639 | 23 | 23 | 23 | 36.1    | 36.1    | 36.1    | 145.31  | 0.0000 | 158.92    | 14115000  | 198   | 14.90 | 15.58 | 15.43 | 15.09 | 15.06 | 15.26 | 15.68 |
| 0.527 | 0.06 | 1.04 | Q9D7N9 | Adipocyte plasma membrane-associated protein                                    | Apmap        | 5037 | 13 | 13 | 13 | 42.2    | 42.2    | 42.2    | 46.434  | 0.0000 | 191.83    | 37324000  | 325   | 16.67 | 16.69 | 16.77 | 16.66 | 16.62 | 16.58 | 16.74 |
| 0.186 | 0.06 | 1.04 | Q61425 | Hydroxyacyl-coenzyme A dehydrogenase, mitochondrial                             | Hadh         | 2299 | 21 | 21 | 21 | 80.9    | 80.9    | 80.9    | 34.463  | 0.0000 | 323.31    | 113590000 | 539   | 17.97 | 17.91 | 17.67 | 17.72 | 18.03 | 17.76 | 17.65 |
| 0.172 | 0.06 | 1.04 | Q8C166 | Copein-1                                                                        | Cope1        | 3355 | 20 | 19 | 19 | 47.2    | 45.5    | 45.5    | 58.886  | 0.0000 | 139.43    | 82054000  | 342   | 17.78 | 17.95 | 17.95 | 17.97 | 17.64 | 17.68 | 18.05 |
| 0.085 | 0.06 | 1.04 | P28352 | DNA-(apurinic or pyrimidinic site) lyase-DNA-(apurinic or pyrimidinic site)Ape1 | Ape1         | 949  | 19 | 19 | 19 | 71.6    | 71.6    | 71.6    | 35.49   | 0.0000 | 196.43    | 80228000  | 507   | 17.17 | 16.91 | 16.91 | 17.12 | 17.41 | 16.52 | 16.70 |
| 0.191 | 0.06 | 1.04 | Q8CKK3 | Lon protease homolog, mitochondrial                                             | Lonp1        | 3509 | 46 | 46 | 46 | 63.1    | 63.1    | 63.1    | 105.84  | 0.0000 | 323.31    | 86030000  | 712   | 17.01 | 16.77 | 16.88 | 16.93 | 16.59 | 16.97 | 16.83 |
| 0.095 | 0.06 | 1.04 | Q8VD65 | Phosphoinositide 3-kinase regulatory subunit 4                                  | Pik3r4       | 3942 | 26 | 26 | 26 | 27.5    | 27.5    | 27.5    | 152.6   | 0.0000 | 164.35    | 21307000  | 209   | 15.39 | 14.93 | 15.41 | 15.33 | 14.75 | 15.40 | 15.27 |
| 0.182 | 0.06 | 1.04 | P62196 | 26S protease regulatory subunit 8                                               | Ppmc5        | 1407 | 37 | 37 | 37 | 83.3    | 83.3    | 83.3    | 45.626  | 0.0000 | 323.31    | 205520000 | 1036  | 18.51 | 18.58 | 18.57 | 18.31 | 18.78 | 18.45 | 18.43 |
| 0.134 | 0.06 | 1.04 | Q3TJH4 | 2,5-phosphodiesterase 12                                                        | Pde12        | 1850 | 11 | 11 | 11 | 28.1    | 28.1    | 28.1    | 67.513  | 0.0000 | 53.863    | 14863000  | 149   | 15.55 | 15.66 | 15.70 | 15.57 | 15.94 | 15.70 | 15.37 |
| 0.167 | 0.06 | 1.04 | P62259 | 14-3-3 protein epsilon                                                          | Whae         | 1410 | 32 | 29 | 29 | 85.5    | 85.5    | 85.5    | 29.174  | 0.0000 | 323.31    | 564100000 | 1307  | 20.15 | 20.43 | 20.26 | 20.44 | 20.29 | 20.15 | 20.00 |
| 0.130 | 0.06 | 1.04 | Q92119 | Exosome complex component RRP41                                                 | Exosa4       | 4228 | 7  | 7  | 7  | 39.2    | 39.2    | 39.2    | 26.249  | 0.0000 | 182.34    | 11028000  | 130   | 15.70 | 15.80 | 15.82 | 16.05 | 15.51 | 15.48 | 15.82 |
| 0.175 | 0.06 | 1.04 | Q3U319 | E3 ubiquitin-protein ligase BRE1B                                               | Rnf40        | 1916 | 16 | 16 | 16 | 22.9    | 22.9    | 22.9    | 113.97  | 0.0000 | 91.03     | 9028000   | 110   | 13.69 | 13.82 | 13.98 | 13.62 | 13.80 | 14.00 | 13.67 |
| 0.102 | 0.06 | 1.04 | Q8BF04 | WD repeat-containing protein 82                                                 | Wdr82        | 2942 | 11 | 11 | 11 | 26.5    | 26.5    | 26.5    | 35.079  | 0.0000 | 146.93    | 295860000 | 247   | 17.14 | 16.77 | 16.86 | 17.18 | 16.05 | 16.77 | 16.85 |
| 0.043 | 0.06 | 1.04 | Q8BWI1 | Protein prune homolog                                                           | Prune        | 3365 | 6  | 6  | 6  | 17.2    | 17.2    | 17.2    | 50.239  | 0.0000 | 38.39     | 42027000  | 62    | 14.17 | 13.90 | 13.98 | 14.57 | 14.23 | 14.05 | 12.92 |
| 0.209 | 0.06 | 1.04 | Q8ERK4 | Exportin-2                                                                      | Cse1l        | 5313 | 26 | 26 | 26 | 31.8    | 31.8    | 31.8    | 110.45  | 0.0000 | 323.31    | 200390000 | 714   | 20.80 | 20.63 | 20.74 | 20.87 | 20.99 | 20.63 | 20.48 |
| 0.302 | 0.06 | 1.04 | Q9K8K8 | Hydroxyacylglutathione hydrolase, mitochondrial                                 | Hagh         | 4369 | 8  | 8  | 8  | 34      | 34      | 34      | 34.084  | 0.0000 | 84.058    | 23330000  | 189   | 15.98 | 16.07 | 16.24 | 16.08 | 15.69 | 15.99 | 16.12 |
| 0.031 | 0.06 | 1.04 | Q6ZQH8 | Nucleoporin NUP188 homolog                                                      | Nup188       | 2699 | 12 | 12 | 12 | 9.4     | 9.4     | 9.4     | 196.69  | 0.0000 | 25.574    | 6633300   | 68    | 14.73 | 13.87 | 14.17 | 13.16 | 14.63 | 13.70 | 15.32 |
| 0.153 | 0.06 | 1.04 | Q9B917 | Notin-1                                                                         | Not1         | 528  | 19 | 19 | 19 | 52.8    | 52.8    | 52.8    | 47.513  | 0.0000 | 61.954    | 24446000  | 158   | 15.47 | 15.32 | 15.48 | 15.24 | 15.39 | 15.47 | 15.48 |
| 0.080 | 0.05 | 1.04 | Q9D6T0 | Nitric oxide synthase-interacting protein                                       | Nosip        | 5096 | 7  | 7  | 7  | 33.2    | 33.2    | 33.2    | 33.209  | 0.0000 | 41.716    | 7024900   | 69    | 14.95 | 15.44 | 15.56 | 15.71 | 15.02 | 15.25 | 15.08 |
| 0.044 | 0.05 | 1.04 | Q61183 | Q9V9Poly(A) polymerase alpha:Poly(A) polymerase beta                            | Papola/Papob | 2269 | 6  | 6  | 6  | 12.2    | 12.2    | 12.2    | 82.308  | 0.0000 | 18.805    | 12463000  | 81    | 15.57 | 15.40 | 15.60 | 15.78 | 14.48 | 16.13 | 15.48 |
| 0.091 | 0.05 | 1.04 | Q4JIM5 | Abelson tyrosine-protein kinase 2                                               | Abl2         | 2060 | 3  | 3  | 2  | 5.5     | 5.5     | 5.5     | 128.19  | 0.0000 | 38.145    | 2563000   | 59    | 13.48 | 13.56 | 13.91 | 13.38 | 14.05 | 13.43 | 13.54 |
| 0.044 | 0.05 | 1.04 | Q8B370 | Nucleoside diphosphate kinase 1                                                 | Ndck1a       | 525  | 6  | 6  | 6  | 176.022 | 176.022 | 176.022 | 34.5560 | 0.0000 | 16.46     | 3455600   | 47    | 13.65 | 13.46 | 13.46 | 13.65 | 13.46 | 13.46 | 13.47 |
| 0.415 | 0.05 | 1.04 | Q91XD6 | Vacuolar protein-sorting-associated protein 36                                  | Vps36        | 4142 | 19 | 19 | 19 | 58      | 58      | 58      | 43.735  | 0.0000 | 128.41    | 31495000  | 248   | 16.10 | 16.01 | 15.98 | 16.06 | 15.89 | 15.92 | 16.03 |
| 0.024 | 0.05 | 1.04 | P05977 | Myosin light chain 1/3, skeletal muscle isoform                                 | My1l         | 654  | 3  | 3  | 3  | 19.1    | 19.1    | 19.1    | 20.594  | 0.0000 | 8.5512    | 3496900   | 45    | 14.65 | 15.78 | 14.35 | 15.81 | 13.80 | 14.09 | 15.79 |
| 0.046 | 0.05 | 1.04 | Q9Z1M0 | P2X purinoceptor 7                                                              | P2rx7        | 5812 | 13 | 13 | 13 | 34.3    | 34.3    | 34.3    | 68.388  | 0.0000 | 116.47    | 19656000  | 211   | 15.94 | 15.56 | 15.34 | 15.91 | 14.63 | 16.02 | 15.67 |
| 0.058 | 0.05 | 1.04 | Q3UPH1 | Protein RRR1C1                                                                  | Rrrc1        | 2014 | 10 | 10 | 10 | 33.9    | 33.9    | 33.9    | 46.297  | 0.0000 | 140.69    | 25625000  | 166   | 16.46 | 16.35 | 16.22 | 16.58 | 16.35 | 16.47 | 16.43 |
| 0.031 | 0.05 | 1.04 | Q8C407 | Protein YIPF4                                                                   | Yip4         | 3384 | 4  | 4  | 4  | 28.9    | 28.9    | 28.9    | 27.283  | 0.0000 | 17.617    | 8641300   | 67    | 14.90 | 14.61 | 14.98 | 14.71 | 13.83 | 15.87 | 15.28 |
| 0.149 | 0.05 | 1.04 | Q9CV02 | Ataxin-3                                                                        | Atxn3        | 4707 | 6  | 6  | 6  | 22.5    | 22.5    | 22.5    | 40.533  | 0.0000 | 37.68     | 7811500   | 67    | 15.14 | 15.39 | 15.41 | 15.37 | 15.28 | 14.99 | 15.40 |
| 0.261 | 0.05 | 1.04 | Q9JL62 | Glycolipid transfer protein                                                     | Gltp         | 5473 | 10 | 10 | 10 | 49.8    | 49.8    | 49.8    | 23.689  | 0.0000 | 61.053    | 79385000  | 350   | 18.41 | 18.48 | 18.54 | 18.26 | 18.57 | 18.43 | 18.44 |
| 0.813 | 0.05 | 1.04 | Q9C0J6 | Cocoon-like protein                                                             | Cof1         | 4803 | 28 | 28 | 28 | 99.3    | 99.3    | 99.3    | 15.944  | 0.0000 | 323.31    | 60776000  | 1065  | 19.73 | 19.70 | 19.70 | 19.66 | 19.68 | 19.70 | 19.59 |
| 0.208 | 0.05 | 1.04 | Q9B1Y4 | TrkB domain-containing protein                                                  | Trkb         | 4357 | 28 | 28 | 28 | 18.2    | 18.2    | 18.2    | 42.189  | 0.0000 | 72.763    | 15420000  | 103   | 16.02 | 15.75 | 15.85 | 16.17 | 16.02 | 15.82 | 15.85 |
| 0.145 | 0.05 | 1.04 | Q9Z0Q4 | Vacuolar protein sorting-associated protein 16 homolog                          | Vps16        | 4612 | 27 | 27 | 27 | 41      | 41      | 41      | 94.927  | 0.0000 | 212.92    | 59140000  | 446   | 16.87 | 16.52 | 16.67 | 16.72 | 16.50 | 16.82 | 16.50 |
| 0.193 | 0.05 | 1.04 | Q61205 | Platelet-activating factor acetylhydrolase IB subunit gamma                     | Pafah1b3     | 2275 | 11 | 11 | 11 | 64.2    | 64.2    | 64.2    | 25.853  | 0.0000 | 58.817    | 16208000  | 124   | 16.34 | 16.34 | 16.21 | 16.28 | 16.28 | 16.40 | 16.02 |
| 0.251 | 0.05 | 1.04 | P50516 | V-type proton ATPase catalytic subunit A                                        | Atp6v1a      | 1184 | 56 | 56 | 56 | 96.1    | 96.1    | 96.1    | 68.325  | 0.0000 | 323.31    | 136450000 | 2659  | 20.55 | 20.37 | 20.49 | 20.46 | 20.38 | 20.55 | 20.28 |
| 0.092 | 0.05 | 1.04 | Q8UJ28 | MAP kinase-activating death domain protein                                      | Madd         | 2816 | 14 | 14 | 14 | 13.8    | 13.8    | 13.8    | 175.18  | 0.0000 | 87.9      | 13322000  | 153   | 14.70 | 14.51 | 14.64 | 14.80 | 14.34 | 14.97 | 14.43 |
| 0.173 | 0.05 | 1.04 | Q6ZKQ5 | Arf-GAP with coiled-coil, ANK repeat and PH domain-containing protein 2         | Acap2        | 2700 | 25 | 25 | 24 | 42.6    | 42.6    | 41.6    | 87.21   | 0.0000 | 146.38    | 43330000  | 450   | 15.91 | 15.71 | 15.84 | 15.89 | 15.56 | 15.92 | 15.71 |
| 0.096 | 0.05 | 1.04 | Q3UCV8 | Ubiquitin thioesterase otulin                                                   | Otluin       | 1945 | 9  | 9  | 9  | 34.7    | 34.7    | 34.7    | 40.32   | 0.0000 | 24.28     | 21603000  | 184   | 15.50 | 15.80 | 15.76 | 15.55 | 15.99 | 15.71 | 15.30 |
| 0.053 | 0.05 | 1.03 | Q8QZU7 | Protein asunser homolog                                                         | Asun         | 3766 | 5  | 5  | 5  | 7.4     | 7.4     | 7.4     | 82.779  | 0      |           |           |       |       |       |       |       |       |       |       |

|       |      |      |        |                                                                                       |          |      |      |      |    |      |      |        |        |        |           |            |       |       |       |       |       |       |       |       |
|-------|------|------|--------|---------------------------------------------------------------------------------------|----------|------|------|------|----|------|------|--------|--------|--------|-----------|------------|-------|-------|-------|-------|-------|-------|-------|-------|
| 0.166 | 0.03 | 1.02 | Q9DCD0 | 6-phosphogluconate dehydrogenase, decarboxylating                                     | Pgd      | 5207 | 50   | 50   | 50 | 89.9 | 89.9 | 89.9   | 53.247 | 0.0000 | 323.31    | 1965300000 | 2821  | 21.02 | 20.89 | 20.88 | 20.89 | 20.95 | 20.89 | 20.78 |
| 0.014 | 0.03 | 1.02 | Q99K90 | TGF-beta-activated kinase 1 and MAP3K7-binding protein 2                              | Tab2     | 4367 | 9    | 9    | 9  | 21.9 | 21.9 | 21.9   | 76.441 | 0.0000 | 39.613    | 8694100    | 97    | 14.39 | 14.43 | 14.55 | 15.09 | 12.60 | 14.97 | 15.05 |
| 0.043 | 0.03 | 1.02 | Q9JUL8 | Serine--RNA ligase, mitochondrial                                                     | Sars2    | 5431 | 10   | 10   | 10 | 25.7 | 25.7 | 25.7   | 58.316 | 0.0000 | 133.11    | 7633200    | 98    | 14.43 | 14.05 | 14.41 | 14.77 | 14.12 | 14.22 | 13.97 |
| 0.127 | 0.03 | 1.02 | P49312 | Heterogeneous nuclear ribonucleoprotein A1:Heterogeneous nuclear ribonucleoprotein A1 | Hnra1    | 1160 | 23   | 23   | 23 | 79.7 | 79.7 | 79.7   | 34.196 | 0.0000 | 283.15    | 65335000   | 458   | 16.88 | 17.20 | 17.13 | 17.05 | 17.08 | 17.00 | 17.02 |
| 0.130 | 0.03 | 1.02 | Q9P5D9 | U6 snRNP maintenance of chromosomes flexible hinge domain-containing protein          | Hmfrp1   | 2571 | 38   | 38   | 38 | 26.7 | 26.7 | 26.7   | 20.000 | 0.0000 | 283.15    | 33288000   | 329   | 15.42 | 15.34 | 15.32 | 15.34 | 15.34 | 15.34 | 15.39 |
| 0.080 | 0.03 | 1.02 | Q9P3D0 | U8 snRNP-decapping enzyme                                                             | Nutylm1  | 2561 | 4    | 4    | 4  | 25.6 | 25.6 | 25.6   | 21.825 | 0.0000 | 17.761    | 2989500    | 39    | 14.21 | 13.96 | 14.28 | 14.00 | 14.35 | 14.02 | 14.12 |
| 0.024 | 0.03 | 1.02 | Q6DFX2 | Anthrax toxin receptor 2                                                              | Antr2    | 2507 | 3    | 3    | 3  | 11.3 | 11.3 | 11.3   | 53.184 | 0.0000 | 9.7942    | 1926100    | 24    | 13.26 | 13.32 | 13.15 | 14.04 | 12.46 | 13.16 | 13.19 |
| 0.035 | 0.03 | 1.02 | Q9Z2X8 | Kelch-like ECH-associated protein 1                                                   | Keap1    | 5872 | 8    | 8    | 8  | 14.7 | 14.7 | 14.7   | 69.552 | 0.0000 | 12.119    | 3875400    | 40    | 14.10 | 13.70 | 13.96 | 13.81 | 12.72 | 14.49 | 13.87 |
| 0.020 | 0.03 | 1.02 | P62635 | Ras-related protein Rap-1A                                                            | Rap1a    | 1450 | 17   | 17   | 17 | 35.3 | 35.3 | 35.3   | 20.987 | 0.0000 | 33.806    | 19004000   | 164   | 15.63 | 16.03 | 17.17 | 16.55 | 15.58 | 16.52 | 16.62 |
| 0.094 | 0.03 | 1.02 | Q9TVR2 | ATP synthase subunit gamma, mitochondrial                                             | Atp5c1   | 587  | 22   | 22   | 22 | 58.7 | 58.7 | 58.7   | 32.886 | 0.0000 | 323.31    | 175060000  | 708   | 18.06 | 17.94 | 18.05 | 17.87 | 17.88 | 18.20 | 18.04 |
| 0.083 | 0.02 | 1.02 | Q99K48 | Non-POU domain-containing octamer-binding protein                                     | Nono     | 4362 | 46   | 44   | 44 | 75.9 | 75.9 | 75.9   | 54.54  | 0.0000 | 323.31    | 252450000  | 1208  | 18.28 | 18.12 | 18.31 | 18.23 | 18.13 | 18.43 | 18.06 |
| 0.019 | 0.02 | 1.02 | P55258 | Ras-related protein Rab-8A                                                            | Rab8a    | 1270 | 19   | 14   | 14 | 60.9 | 51.7 | 51.7   | 23.668 | 0.0000 | 79.579    | 61220000   | 304   | 17.75 | 17.27 | 17.50 | 17.53 | 17.46 | 17.37 | 17.58 |
| 0.055 | 0.02 | 1.02 | Q9JHK5 | Pleckstrin                                                                            | Plek     | 5366 | 25   | 25   | 25 | 56.6 | 56.6 | 56.6   | 39.9   | 0.0000 | 305.44    | 96551000   | 489   | 17.27 | 17.63 | 17.67 | 17.24 | 17.49 | 17.60 | 17.67 |
| 0.041 | 0.02 | 1.02 | Q9JUY4 | Probable ATP-dependent RNA helicase DDX20                                             | Ddx20    | 5430 | 11   | 11   | 11 | 21.9 | 21.9 | 21.9   | 91.709 | 0.0000 | 55        | 10344000   | 125   | 15.38 | 15.06 | 14.98 | 15.49 | 14.98 | 14.82 | 15.15 |
| 0.071 | 0.02 | 1.02 | Q88844 | Isochorate dehydrogenase [NADP] cytoplasmic                                           | Icdh1    | 574  | 52   | 52   | 50 | 89.6 | 89.6 | 89.6   | 46.674 | 0.0000 | 323.31    | 1272500000 | 2627  | 19.89 | 19.93 | 19.93 | 19.99 | 20.13 | 19.74 | 19.72 |
| 0.025 | 0.02 | 1.02 | Q8C1M8 | Integrator complex subunit 4                                                          | Ints4    | 3560 | 11   | 11   | 11 | 18.2 | 18.2 | 18.2   | 108.19 | 0.0000 | 46.493    | 4701400    | 87    | 13.82 | 13.43 | 13.87 | 13.87 | 14.22 | 13.62 | 13.03 |
| 0.013 | 0.02 | 1.02 | Q9QYV1 | Retinol dehydrogenase 11                                                              | Rdh11    | 5571 | 14   | 14   | 14 | 38.9 | 38.9 | 38.9   | 35.147 | 0.0000 | 100.02    | 37154000   | 238   | 17.66 | 17.39 | 17.26 | 17.58 | 17.24 | 17.40 | 17.43 |
| 0.022 | 0.02 | 1.02 | Q8RH2D | Protein FAM69A                                                                        | Fam69a   | 3053 | 14   | 12   | 12 | 45.5 | 38.7 | 37.342 | 0.0000 | 185.84 | 44913000  | 204        | 16.16 | 16.19 | 16.45 | 16.20 | 17.02 | 15.93 | 15.78 |       |
| 0.065 | 0.02 | 1.02 | Q9Z2F2 | 2-5-glucosylate synthase-like protein 2                                               | Oat2     | 5849 | 8    | 8    | 7  | 23.2 | 17.9 | 17.9   | 58.767 | 0.0000 | 26.838    | 8915500    | 65    | 12.83 | 13.11 | 13.01 | 13.71 | 12.47 | 13.63 | 12.04 |
| 0.064 | 0.02 | 1.02 | Q9QZ55 | Costamer subunit gamma-1                                                              | Copp1    | 5595 | 38   | 38   | 35 | 61.3 | 61.3 | 57.2   | 97.512 | 0.0000 | 323.31    | 198890000  | 1116  | 18.45 | 18.11 | 18.27 | 18.29 | 18.41 | 18.05 | 18.28 |
| 0.087 | 0.02 | 1.02 | Q6P5E6 | ADP-ribosylation factor-binding protein GGA2                                          | Gga2     | 2575 | 11   | 10   | 10 | 33.8 | 32.7 | 32.7   | 66.048 | 0.0000 | 187.55    | 20227000   | 183   | 16.16 | 16.28 | 16.17 | 16.34 | 16.04 | 16.08 | 16.27 |
| 0.095 | 0.02 | 1.02 | Q00262 | Syntaxin-2                                                                            | Sxc2     | 1695 | 6    | 6    | 6  | 35.3 | 35.3 | 33.177 | 0.0000 | 285.76 | 14422000  | 184        | 15.97 | 15.73 | 15.74 | 15.82 | 15.87 | 15.81 | 15.87 |       |
| 0.041 | 0.02 | 1.01 | P84089 | Enhancer of rudimentary homolog                                                       | Erh      | 1607 | 8    | 8    | 8  | 85.6 | 85.6 | 12.269 | 0.0000 | 113.15 | 20442000  | 256        | 15.54 | 15.96 | 16.15 | 15.80 | 16.06 | 15.67 | 15.90 |       |
| 0.068 | 0.02 | 1.01 | Q70310 | Glycopeptide N-tetradecanoyltransferase 1                                             | Nmt1     | 486  | 27   | 27   | 23 | 46.6 | 42.7 | 56.888 | 0.0000 | 323.31 | 90814000  | 558        | 17.40 | 17.14 | 17.27 | 17.33 | 17.10 | 17.42 | 17.15 |       |
| 0.049 | 0.02 | 1.01 | Q9QX89 | Developmentally-regulated GTP-binding protein 2                                       | Drg2     | 5535 | 22   | 22   | 22 | 54.1 | 54.1 | 40.718 | 0.0000 | 180.68 | 51589000  | 383        | 16.80 | 16.49 | 16.68 | 16.92 | 16.43 | 16.69 | 16.51 |       |
| 0.043 | 0.03 | 1.01 | Q61102 | ATP-binding cassette sub-family B member 7, mitochondrial                             | Abcb7    | 2521 | 31   | 31   | 31 | 46.5 | 54.1 | 82.58  | 0.0000 | 249.75 | 459152000 | 496        | 15.87 | 15.97 | 15.88 | 15.81 | 15.97 | 15.68 | 15.45 |       |
| 0.051 | 0.02 | 1.01 | P93316 | T-complex protein 1 subunit epsilon                                                   | Cdb      | 558  | 59   | 59   | 59 | 85.8 | 85.8 | 59.623 | 0.0000 | 323.31 | 556260000 | 2012       | 19.32 | 19.35 | 19.35 | 19.32 | 19.35 | 19.62 | 19.49 |       |
| 0.087 | 0.02 | 1.01 | Q3U609 | Lamin-B receptor                                                                      | Lbr      | 1936 | 22   | 22   | 22 | 31.8 | 31.8 | 71.439 | 0.0000 | 149    | 40757000  | 316        | 16.68 | 16.70 | 16.64 | 16.79 | 16.73 | 16.63 | 16.47 |       |
| 0.041 | 0.02 | 1.01 | Q8R049 | ADP-ribosylation factor-binding protein GGA1                                          | Gga1     | 3760 | 16   | 16   | 15 | 33.2 | 32.1 | 69.971 | 0.0000 | 323.31 | 39672000  | 340        | 16.71 | 16.41 | 16.71 | 16.93 | 16.59 | 16.52 | 16.32 |       |
| 0.063 | 0.02 | 1.01 | P54071 | Isochorate dehydrogenase [NADP], mitochondrial                                        | Icdh2    | 1246 | 38   | 36   | 36 | 71.5 | 71.5 | 71.5   | 50.906 | 0.0000 | 323.31    | 32353000   | 1118  | 18.50 | 18.24 | 18.31 | 18.46 | 18.46 | 18.22 | 18.17 |
| 0.024 | 0.02 | 1.01 | P48024 | Eukaryotic translation initiation factor 1                                            | EIF1     | 1136 | 12   | 12   | 12 | 65.5 | 55.7 | 12.745 | 0.0000 | 134.84 | 19118000  | 122        | 17.01 | 17.24 | 16.97 | 17.02 | 16.97 | 16.97 | 16.99 |       |
| 0.045 | 0.02 | 1.01 | Q9R1P1 | Proteasome subunit beta type-3                                                        | Psm3     | 5654 | 11   | 11   | 11 | 53.7 | 53.7 | 22.965 | 0.0000 | 169.58 | 125470000 | 413        | 19.49 | 19.14 | 19.22 | 19.22 | 19.49 | 19.32 | 19.04 |       |
| 0.063 | 0.02 | 1.01 | Q6PD03 | Serine/threonine-protein phosphatase 2A 56 kDa regulatory subunit alpha Ppp2r5a       | Ppp2r5a  | 2607 | 15   | 15   | 15 | 33.1 | 33.1 | 56.346 | 0.0000 | 419    | 15261000  | 221        | 14.96 | 14.86 | 15.06 | 15.02 | 14.76 | 14.97 | 15.15 |       |
| 0.051 | 0.02 | 1.01 | Q63844 | Mitogen-activated protein kinase 3                                                    | Mapk3    | 2405 | 25   | 25   | 19 | 70   | 70   | 48.038 | 0.0000 | 323.31 | 272570000 | 764        | 19.84 | 19.55 | 19.51 | 19.63 | 19.69 | 19.73 | 19.42 |       |
| 0.105 | 0.02 | 1.01 | Q6EFL8 | Protein FAM69A                                                                        | Fam69a   | 3053 | 14   | 12   | 12 | 45.5 | 38.7 | 37.342 | 0.0000 | 185.84 | 44913000  | 204        | 16.16 | 16.19 | 16.45 | 16.20 | 17.02 | 15.93 | 15.78 |       |
| 0.032 | 0.02 | 1.01 | Q5U458 | DnaJ homolog subfamily C member 11                                                    | Dnajc11  | 2164 | 18   | 18   | 18 | 34.3 | 34.3 | 63.232 | 0.0000 | 129.23 | 18097000  | 178        | 15.25 | 15.25 | 14.92 | 15.36 | 15.33 | 14.82 | 14.98 |       |
| 0.086 | 0.02 | 1.01 | Q9Z2R8 | Protein disulfide-isomerase A6                                                        | Pdia6    | 4276 | 27   | 27   | 27 | 53.9 | 53.9 | 48.1   | 0.0000 | 323.31 | 453530000 | 956        | 19.50 | 19.42 | 19.59 | 19.56 | 19.57 | 19.40 | 19.41 |       |
| 0.063 | 0.02 | 1.01 | Q88531 | Palmitoyl-protein thioesterase 1                                                      | Ppt1     | 540  | 12   | 12   | 12 | 37.6 | 37.6 | 34.49  | 0.0000 | 285.44 | 77989000  | 331        | 17.66 | 17.92 | 17.88 | 17.92 | 17.79 | 17.65 | 17.85 |       |
| 0.025 | 0.02 | 1.01 | P56466 | Yeast-terminal domain RNA polymerase I polypeptide A small phosphoprotein             | Dhbp1    | 21   | 1316 | 1316 | 4  | 4    | 21.8 | 21.8   | 29.269 | 0.0000 | 113.15    | 20442000   | 119   | 16.20 | 16.20 | 16.09 | 16.09 | 16.20 | 16.09 | 16.09 |
| 0.027 | 0.02 | 1.01 | Q88384 | Vesicle transport through protein with t-SNAREs homolog 1B                            | Vt1b     | 526  | 14   | 14   | 14 | 56   | 56   | 26.713 | 0.0000 | 166.75 | 49696000  | 272        | 16.73 | 16.74 | 16.63 | 16.76 | 16.19 | 16.96 | 16.86 |       |
| 0.053 | 0.02 | 1.01 | Q3U1L0 | Protein transport protein Sec31A                                                      | Sec31a   | 2015 | 49   | 49   | 49 | 39.2 | 39.2 | 133.57 | 0.0000 | 323.31 | 143540000 | 1058       | 17.41 | 17.14 | 17.34 | 17.20 | 17.45 | 17.32 | 17.15 |       |
| 0.055 | 0.02 | 1.01 | P01899 | POH-2 class I histocompatibility antigen, D-B alpha chain/H-2-D1/H-2L                 | H2-L2    | 621  | 26   | 26   | 18 | 53.9 | 53.9 | 40.836 | 0.0000 | 222.05 | 309290000 | 670        | 19.43 | 19.38 | 19.24 | 19.54 | 19.33 | 19.29 | 19.19 |       |
| 0.020 | 0.02 | 1.01 | P24604 | Tyrosine-protein kinase Tec                                                           | Tec      | 900  | 7    | 7    | 7  | 13.2 | 13.2 | 73.425 | 0.0000 | 35.05  | 3048800   | 62         | 14.05 | 13.50 | 13.23 | 13.74 | 13.65 | 13.77 | 13.14 |       |
| 0.048 | 0.02 | 1.01 | Q64105 | Protein-tyrosine phosphatase                                                          | Spr      | 54   | 12   | 12   | 12 | 54   | 54   | 27.883 | 0.0000 | 100.02 | 100610000 | 523        | 18.54 | 18.53 | 18.51 | 18.54 | 18.53 | 18.54 | 18.54 |       |
| 0.033 | 0.02 | 1.01 | P41241 | Tyrosine-protein kinase CSK                                                           | Csk      | 1068 | 31   | 31   | 30 | 74.2 | 74.2 | 50.716 | 0.0000 | 203.77 | 97358000  | 613        | 17.21 | 17.25 | 17.25 | 17.58 | 16.95 | 17.20 | 17.16 |       |
| 0.010 | 0.01 | 1.01 | Q9D920 | Loss of heterozygosity 12 chromosomal region 1 protein homolog                        | Loh12cr1 | 5090 | 5    | 5    | 5  | 40.5 | 40.5 | 22.12  | 0.0000 | 18.885 | 2776200   | 32         | 13.72 | 13.95 | 13.89 | 14.28 | 12.86 | 13.42 | 14.80 |       |
| 0.047 | 0.01 | 1.01 | P52332 | Tyrosine-protein kinase JAK1                                                          | Jak1     | 1215 | 26   | 26   | 24 | 29.2 | 29.2 | 27.6   | 133.37 | 0.0000 | 110.76    | 31170000   | 327   | 16.02 | 15.73 | 15.93 | 16.02 | 15.77 | 15.96 | 15.77 |
| 0.069 | 0.01 | 1.01 | P46564 | Adenylosuccinate synthetase isozyme 2                                                 | Adss     | 493  | 29   | 26   | 25 | 55.7 | 49.3 | 50.02  | 0.0000 | 245.34 | 182230000 | 726        | 19.91 | 19.76 | 19.88 | 19.94 | 19.76 | 19.89 | 19.69 |       |
| 0.024 | 0.01 | 1.01 | Q8BY16 | Lysophosphatidylcholine acyltransferase 2                                             | Lpcat2   | 3300 | 15   | 15   | 15 | 36.9 | 36.9 | 60.253 | 0.0000 | 100.88 | 45007000  | 265        | 16.73 | 16.59 | 16.47 | 16.54 | 16.94 | 16.23 | 16.62 |       |
| 0.062 | 0.01 | 1.01 | Q09131 | Glutathione S-transferase omega-1                                                     | Gsto1    | 327  | 29   | 29   | 29 | 74.2 | 74.2 | 27.497 | 0.0000 | 271    | 219320000 | 871        | 19.19 | 18.93 | 19.02 | 19.07 | 18.98 | 19.10 | 18.97 |       |
| 0.082 | 0.01 | 1.01 | Q9JZ28 | Protein flightless-1 homolog                                                          | Flii     | 5417 | 53   | 53   | 53 | 54.3 | 54.3 | 144.8  | 0.0000 | 323.31 | 175230000 | 1029       | 17.69 | 17.61 | 17.70 | 17.56 | 17.64 | 17.71 | 17.71 |       |
| 0.044 | 0.01 | 1.01 | Q9D958 |                                                                                       |          |      |      |      |    |      |      |        |        |        |           |            |       |       |       |       |       |       |       |       |

|       |       |      |         |                                                                                     |          |      |    |    |      |      |        |        |        |          |           |           |       |       |       |       |       |       |       |       |
|-------|-------|------|---------|-------------------------------------------------------------------------------------|----------|------|----|----|------|------|--------|--------|--------|----------|-----------|-----------|-------|-------|-------|-------|-------|-------|-------|-------|
| 0.015 | 0.00  | 1.00 | Q9QZ73  | DCN1-like protein 1                                                                 | Dcam1d1  | 5586 | 4  | 4  | 4    | 17.4 | 17.4   | 17.4   | 30.097 | 0.0000   | 33.289    | 11377000  | 79    | 16.01 | 15.98 | 15.98 | 15.99 | 16.01 | 15.93 | 15.89 |
| 0.009 | 0.00  | 1.00 | Q5JKV1  | Proteasomal ubiquitin receptor ADRM1                                                | Adrm1    | 5459 | 7  | 7  | 7    | 19.9 | 19.9   | 19.9   | 42.06  | 0.0000   | 65.122    | 31485000  | 118   | 17.50 | 17.32 | 17.47 | 17.48 | 17.49 | 17.52 | 17.24 |
| 0.006 | 0.00  | 1.00 | Q8CBY8  | Dynactin subunit 4                                                                  | Dctn4    | 3441 | 14 | 14 | 14   | 35.8 | 35.8   | 35.8   | 53.056 | 0.0000   | 109.19    | 39263000  | 285   | 17.11 | 16.69 | 17.20 | 17.06 | 16.88 | 17.15 | 16.90 |
| 0.010 | 0.00  | 1.00 | Q8B8H6  | UPF0317 protein C14orf159 homolog, mitochondrial                                    |          | 3022 | 20 | 20 | 20   | 39.7 | 39.7   | 39.7   | 66.365 | 0.0000   | 162.61    | 34185000  | 320   | 16.03 | 15.97 | 16.05 | 16.25 | 15.91 | 15.96 | 15.96 |
| 0.010 | 0.00  | 1.00 | Q6P8K1  | 46-kDa non-6-Sorting rexin-6, N-terminally processed                                | Smc6     | 2566 | 33 | 33 | 33   | 64   | 64     | 64     | 69.77  | 0.0000   | 323.31    | 12815000  | 845   | 16.91 | 16.91 | 16.91 | 16.96 | 16.91 | 16.91 | 16.93 |
| 0.024 | 0.00  | 1.00 | Q8AH87  | Cytoplasmic dynein 1 intermediate chain 2                                           | Dync1i2  | 5324 | 18 | 18 | 18   | 42.5 | 42.5   | 42.5   | 68.393 | 0.0000   | 323.31    | 138280000 | 626   | 18.45 | 18.52 | 18.46 | 18.49 | 18.53 | 18.52 | 18.37 |
| 0.016 | 0.00  | 1.00 | P58389  | Serine/threonine-protein phosphatase 2A activator                                   | Ppp2r4   | 1314 | 16 | 16 | 16   | 68.4 | 68.4   | 68.4   | 36.71  | 0.0000   | 323.31    | 63609000  | 388   | 17.25 | 17.13 | 17.30 | 17.24 | 17.36 | 17.25 | 17.07 |
| 0.003 | 0.00  | 1.00 | Q35744  | Chitinase-like protein 3                                                            | Chil3    | 404  | 22 | 22 | 22   | 57.3 | 57.3   | 57.3   | 44.458 | 0.0000   | 134.22    | 109870000 | 425   | 17.20 | 17.54 | 18.44 | 17.33 | 17.51 | 17.84 | 18.25 |
| 0.003 | 0.00  | 1.00 | Q8OU58  | Pumilio homolog 2                                                                   | Pum2     | 2820 | 10 | 6  | 6    | 9.8  | 5.7    | 114.31 | 0.0000 | 31.795   | 73841000  | 87        | 14.63 | 14.11 | 14.56 | 14.65 | 15.01 | 15.36 | 14.72 |       |
| 0.014 | 0.00  | 1.00 | P14206  | 40S ribosomal protein SA                                                            | Rpsa     | 777  | 20 | 20 | 18   | 64.4 | 64.4   | 32.838 | 0.0000 | 323.31   | 469100000 | 741       | 20.81 | 20.81 | 20.81 | 20.85 | 20.72 | 20.77 | 20.58 |       |
| 0.005 | 0.00  | 1.00 | Q3TF01  | SPRY domain-containing protein 7                                                    | Spry7    | 1839 | 6  | 6  | 6    | 35.7 | 35.7   | 5.7    | 21.681 | 0.0000   | 24.985    | 4796800   | 75    | 13.48 | 13.87 | 14.39 | 14.05 | 14.20 | 13.32 | 14.10 |
| 0.006 | 0.00  | 1.00 | Q9QY76  | Vesicle-associated membrane protein-associated protein B                            | Vapb     | 5562 | 18 | 17 | 60.9 | 60.9 | 60.9   | 26.946 | 0.0000 | 118.42   | 143800000 | 492       | 18.02 | 17.85 | 18.03 | 18.26 | 17.35 | 18.15 | 18.12 |       |
| 0.026 | -0.01 | 1.00 | P30416  | Peptidyl-prolyl cis-trans isomerase FKBP4/Peptidyl-prolyl cis-trans isomerase FKBP4 | Rbp4     | 978  | 30 | 30 | 30   | 69.9 | 69.9   | 69.9   | 51.572 | 0.0000   | 287.15    | 68119000  | 507   | 16.93 | 16.75 | 16.89 | 17.01 | 16.81 | 16.88 | 16.76 |
| 0.014 | -0.01 | 1.00 | Q9YV19  | Ran-binding protein 10                                                              | Ranbp10  | 2663 | 12 | 12 | 30.2 | 30.2 | 30.2   | 67.188 | 0.0000 | 113.44   | 21912000  | 205       | 16.15 | 15.81 | 16.07 | 16.27 | 15.94 | 16.06 | 15.79 |       |
| 0.019 | -0.01 | 1.00 | P70318  | Nucleosyls TTR                                                                      | Ttr1     | 1553 | 15 | 15 | 12   | 46.7 | 46.7   | 38     | 43.388 | 0.0000   | 218.76    | 49091000  | 309   | 17.81 | 17.86 | 18.00 | 17.73 | 17.96 | 18.12 | 17.78 |
| 0.006 | -0.01 | 1.00 | Q8R0L7  | A-kinase anchor protein 8-like                                                      | Akap8l   | 5628 | 8  | 8  | 8    | 17   | 17     | 17     | 71.453 | 0.0000   | 20.045    | 5365000   | 50    | 14.54 | 15.46 | 14.75 | 13.94 | 14.39 | 14.72 | 15.44 |
| 0.011 | -0.01 | 1.00 | Q91XF0  | Pyridoxine-5-phosphate oxidase                                                      | Ppox     | 4146 | 4  | 4  | 4    | 20.7 | 20.7   | 20.7   | 30.114 | 0.0000   | 17.018    | 6120000   | 26    | 15.68 | 15.30 | 15.66 | 15.46 | 15.22 | 15.95 | 15.68 |
| 0.004 | -0.01 | 1.00 | Q8BYU6  | Torsin-1A-interacting protein 2                                                     | Tor1aip2 | 3306 | 7  | 7  | 7    | 21.5 | 21.5   | 21.5   | 54.495 | 0.0000   | 50.776    | 5946800   | 56    | 13.41 | 13.33 | 13.17 | 13.89 | 12.30 | 14.14 | 12.99 |
| 0.015 | -0.01 | 1.00 | Q8OC07  | Phenylalanine-tRNA ligase alpha subunit                                             | Farsa    | 3330 | 36 | 36 | 36   | 63.2 | 63.2   | 57.598 | 0.0000 | 323.31   | 160340000 | 721       | 18.84 | 18.54 | 18.87 | 18.50 | 18.87 | 18.53 | 18.46 |       |
| 0.004 | -0.01 | 0.99 | Q8DBB5  | Eukaryotic translation initiation factor 4E type 3                                  | Eif4e3   | 5139 | 6  | 6  | 30   | 30   | 22.836 | 0.0000 | 10.883 | 4904800  | 44        | 14.44     | 13.58 | 14.10 | 13.28 | 13.93 | 13.60 | 15.37 |       |       |
| 0.012 | -0.01 | 0.99 | Q9D189  | 39S ribosomal protein L28, mitochondrial                                            | Mrp28    | 4904 | 13 | 13 | 13   | 51.4 | 51.4   | 51.4   | 30.169 | 0.0000   | 74.389    | 42045000  | 328   | 16.04 | 16.38 | 16.54 | 16.00 | 16.18 | 16.45 | 16.88 |
| 0.017 | -0.01 | 0.99 | Q8BM37  | Rab3 GTPase-activating protein non-catalytic subunit                                | Rab3gap2 | 2136 | 26 | 26 | 26   | 29.6 | 29.6   | 48.229 | 0.0000 | 136.12   | 26988000  | 343       | 15.67 | 14.78 | 15.38 | 15.44 | 15.41 | 15.66 | 15.30 |       |
| 0.008 | -0.01 | 0.99 | Q9ULZ9  | Kruppel-like factor 13                                                              | Klf13    | 5441 | 5  | 5  | 4    | 23.5 | 16.6   | 31.36  | 0.0000 | 15.06    | 6487000   | 42        | 14.78 | 14.91 | 14.83 | 14.99 | 14.50 | 15.59 | 14.31 |       |
| 0.014 | -0.01 | 0.99 | P48678  | Prelamin-A/C,Lamin-A/C                                                              | Lmna     | 1147 | 94 | 94 | 92   | 90.1 | 90.1   | 74.737 | 0.0000 | 323.31   | 86233000  | 2869      | 19.11 | 19.91 | 19.46 | 19.47 | 19.47 | 19.51 | 19.59 |       |
| 0.136 | -0.01 | 0.99 | P917429 | Annexin A4                                                                          | Anxa4    | 1648 | 39 | 39 | 38   | 87.5 | 87.5   | 35.915 | 0.0000 | 323.31   | 105450000 | 1708      | 20.52 | 20.52 | 20.54 | 20.52 | 20.59 | 20.49 | 20.54 |       |
| 0.001 | -0.01 | 0.99 | P70362  | Ubiquitin fusion degradation protein 1 homolog                                      | Ufd1l    | 1560 | 13 | 13 | 13   | 45.8 | 45.8   | 34.481 | 0.0000 | 48.029   | 34801000  | 236       | 17.23 | 16.86 | 17.03 | 17.05 | 16.88 | 16.88 | 16.89 |       |
| 0.021 | -0.01 | 0.99 | P42225  | Signal transducer and activator of transcription 1                                  | Stat1    | 1075 | 49 | 49 | 49   | 57.3 | 57.3   | 87.196 | 0.0000 | 323.31   | 49823000  | 1213      | 18.61 | 16.64 | 16.68 | 16.68 | 16.68 | 16.67 | 16.81 |       |
| 0.038 | -0.01 | 0.99 | Q1YE66  | Importin-9                                                                          | Ipo9     | 4155 | 19 | 19 | 19   | 28.8 | 28.8   | 116.05 | 0.0000 | 323.31   | 59831000  | 469       | 17.27 | 16.97 | 17.09 | 17.21 | 17.03 | 17.13 | 17.11 |       |
| 0.009 | -0.01 | 0.99 | Q9J1F3  | Bifunctional lysine-specific demethylase and histidyl-hydroxylase NOG6              | No6b     | 5425 | 8  | 8  | 8    | 18.7 | 18.7   | 67.556 | 0.0000 | 16.468   | 3712200   | 39        | 13.20 | 13.41 | 13.92 | 13.68 | 12.77 | 13.77 | 13.88 |       |
| 0.006 | -0.01 | 0.99 | Q8K4J6  | MKL1myocardin-like protein 1                                                        | Mkl1     | 3718 | 6  | 5  | 12.8 | 7.4  | 11.4   | 102.54 | 0.0000 | 38.183   | 2672400   | 50        | 13.44 | 13.29 | 13.19 | 12.38 | 12.65 | 13.70 | 14.53 |       |
| 0.029 | -0.01 | 0.99 | P35235  | Glucose-6-phosphate non-receptor type 11                                            | Gpn11    | 101  | 25 | 25 | 25   | 46.4 | 46.4   | 68.034 | 0.0000 | 101.37   | 43096000  | 365       | 16.46 | 16.38 | 16.48 | 16.46 | 16.46 | 16.46 | 16.46 |       |
| 0.065 | -0.01 | 0.99 | Q90612  | Glucose-6-phosphate 1-dehydrogenase X                                               | G6pdx    | 3699 | 56 | 56 | 44   | 79   | 68.7   | 59.262 | 0.0000 | 323.31   | 88944000  | 2038      | 18.89 | 20.06 | 20.07 | 20.03 | 19.97 | 19.99 | 20.08 |       |
| 0.029 | -0.01 | 0.99 | Q6PD02  | Chromodomain-helicase-DNA-binding protein 4                                         | Chd4     | 2620 | 50 | 39 | 32.1 | 32.1 | 25.8   | 217.75 | 0.0000 | 323.31   | 72070000  | 674       | 16.17 | 15.96 | 16.02 | 15.80 | 16.21 | 16.07 | 16.16 |       |
| 0.005 | -0.01 | 0.99 | Q8OZW2  | Protein THEM6                                                                       | Them6    | 2923 | 2  | 2  | 2    | 12.6 | 12.6   | 23.802 | 0.0000 | 6.899    | 2294600   | 27        | 13.75 | 13.41 | 13.60 | 13.01 | 12.33 | 15.18 | 13.85 |       |
| 0.023 | -0.01 | 0.99 | O70172  | Phosphatidylinositol 5-phosphate 4-kinase type-2 alpha                              | Ptd4k    | 4751 | 23 | 23 | 16   | 52.3 | 47.51  | 146.37 | 0.0000 | 78937000 | 468       | 17.12     | 17.12 | 17.21 | 17.12 | 17.12 | 17.12 | 17.12 |       |       |
| 0.028 | -0.01 | 0.99 | P62869  | Transcription elongation factor B polypeptide 2                                     | Tae2b    | 1458 | 11 | 11 | 11   | 68.6 | 68.6   | 15.17  | 0.0000 | 67.803   | 35513000  | 192       | 16.83 | 17.01 | 17.21 | 17.01 | 17.04 | 17.04 | 16.84 |       |
| 0.047 | -0.01 | 0.99 | E9QAT4  | Sec16a                                                                              | Sec16a   | 254  | 23 | 23 | 23   | 17.4 | 17.4   | 254.2  | 0.0000 | 106.43   | 21990000  | 220       | 16.02 | 15.88 | 16.03 | 16.06 | 15.90 | 16.10 | 15.88 |       |
| 0.049 | -0.01 | 0.99 | P63154  | Crooked neck-like protein 1                                                         | Cnk1l    | 1492 | 16 | 16 | 16   | 31.2 | 31.2   | 83.415 | 0.0000 | 91.889   | 18545000  | 221       | 15.50 | 15.57 | 15.70 | 15.58 | 15.48 | 15.72 | 15.62 |       |
| 0.031 | -0.01 | 0.99 | Q92157  | 39S ribosomal protein L37, mitochondrial                                            | Mrp37    | 4539 | 16 | 16 | 16   | 45.9 | 45.9   | 48.34  | 0.0000 | 65.049   | 16168000  | 134       | 14.96 | 14.77 | 14.76 | 14.96 | 14.77 | 14.76 | 14.97 |       |
| 0.011 | -0.01 | 0.99 | Q8K214  | Ubiquitin-cytochrome-c reductase complex assembly factor 3                          | Uqc3     | 36   | 3  | 3  | 36   | 36   | 9.9830 | 0.0009 | 3.7502 | 4715700  | 14        | 15.19     | 14.90 | 15.32 | 14.48 | 15.17 | 15.29 | 15.05 |       |       |
| 0.015 | -0.01 | 0.99 | Q3U1Y4  | DENN domain-containing protein 4B                                                   | Dennd4b  | 1906 | 9  | 9  | 9    | 9.3  | 9.3    | 164.74 | 0.0000 | 25.709   | 7232800   | 86        | 14.25 | 13.80 | 13.80 | 13.99 | 13.39 | 14.33 | 14.15 |       |
| 0.008 | -0.01 | 0.99 | Q3UDR8  | Protein YIPF3/Protein YIPF3, N-terminally processed                                 | Yip3     | 1950 | 7  | 7  | 7    | 23.3 | 23.3   | 37.998 | 0.0000 | 28.135   | 7553900   | 43        | 16.09 | 15.31 | 15.46 | 15.41 | 14.92 | 16.80 | 15.41 |       |
| 0.014 | -0.01 | 0.99 | Q9CR06  | Adapin ear-binding coat-associated protein 1                                        | Ncap1    | 4683 | 5  | 5  | 5    | 24.4 | 24.4   | 29.639 | 0.0004 | 4.5864   | 5277600   | 27        | 14.95 | 15.38 | 14.95 | 14.72 | 15.73 | 15.13 | 14.84 |       |
| 0.019 | -0.01 | 0.99 | Q9Z2W0  | Dapsyl aminopeptidase                                                               | Dap1     | 5862 | 40 | 40 | 40   | 52.2 | 52.2   | 52.206 | 0.0000 | 323.31   | 90121000  | 404       | 17.39 | 17.11 | 17.18 | 17.33 | 17.41 | 17.35 | 16.82 |       |
| 0.024 | -0.01 | 0.99 | Q9Z2B1  | O-acetyl-ADP-ribose deacetylase MACROD1                                             | Macro1   | 4246 | 4  | 4  | 4    | 17.6 | 17.6   | 35.294 | 0.0000 | 21.263   | 4804300   | 37        | 14.49 | 14.20 | 14.10 | 14.68 | 14.45 | 14.12 | 13.86 |       |
| 0.039 | -0.01 | 0.99 | Q9DAR7  | m7GpppX diphosphatase                                                               | Dcps     | 5109 | 21 | 21 | 21   | 59.8 | 59.8   | 38.988 | 0.0000 | 113.83   | 54933000  | 293       | 16.67 | 16.74 | 16.89 | 17.03 | 16.73 | 16.62 | 16.72 |       |
| 0.058 | -0.01 | 0.99 | Q9JAY0  | TGFalpha enzyme subunit beta, mitochondrial;3-ketoacyl-CoA thiolase                 | Hadhb    | 4356 | 35 | 35 | 35   | 66.7 | 66.7   | 51.386 | 0.0000 | 305.99   | 19302000  | 768       | 18.01 | 17.74 | 17.96 | 17.93 | 18.00 | 17.90 | 17.84 |       |
| 0.057 | -0.01 | 0.99 | Q3UM45  | Trifunctional protein 1 regulatory subunit 7                                        | Rpp1r7   | 1991 | 20 | 20 | 20   | 47.6 | 47.6   | 41.291 | 0.0000 | 178.66   | 36338000  | 336       | 16.36 | 16.36 | 16.36 | 16.44 | 16.50 | 16.43 | 16.55 |       |
| 0.022 | -0.01 | 0.99 | Q8B456  | Calpain small subunit 1                                                             | Capns1   | 533  | 26 | 26 | 26   | 66.5 | 66.5   | 28.463 | 0.0000 | 323.31   | 647540000 | 1424      | 19.61 | 20.17 | 20.20 | 19.84 | 20.31 | 19.77 | 20.11 |       |
| 0.045 | -0.01 | 0.99 | Q921F2  | TAR DNA-binding protein 43                                                          | Tarbp1   | 4220 | 18 | 18 | 18   | 54.1 | 54.1   | 44.547 | 0.0000 | 323.31   | 119650000 | 495       | 18.01 | 17.85 | 17.94 | 18.03 | 18.14 | 17.90 | 17.73 |       |
| 0.055 | -0.01 | 0.99 | Q9B855  | Receptor-interacting serine/threonine-protein kinase 1                              | Ripk1    | 2213 | 23 | 23 | 23   | 38.7 | 38.7   | 74.854 | 0.0000 | 225.1    | 48928000  | 389       | 16.45 | 16.63 | 16.78 | 16.72 | 16.59 | 16.54 | 16.70 |       |
| 0.026 | -0.02 | 0.99 | P62862  | 40S ribosomal protein S25                                                           | Rps25    | 1774 | 16 | 16 | 16   | 68.8 | 68.8   | 13.762 | 0.0000 | 160.32   | 21510000  | 335       | 19.41 | 19.35 | 19.41 | 19.23 | 19.40 |       |       |       |

|       |       |      |         |                                                                         |          |      |    |    |     |       |       |        |        |        |           |           |       |       |       |       |       |       |       |       |
|-------|-------|------|---------|-------------------------------------------------------------------------|----------|------|----|----|-----|-------|-------|--------|--------|--------|-----------|-----------|-------|-------|-------|-------|-------|-------|-------|-------|
| 0.056 | -0.03 | 0.98 | Q91VH2  | Sorting nexin-9                                                         | Sna9     | 4061 | 18 | 18 | 18  | 46.1  | 46.1  | 46.1   | 66.54  | 0.0000 | 78.504    | 42059000  | 226   | 17.02 | 16.61 | 16.91 | 17.16 | 17.10 | 16.79 | 16.49 |
| 0.056 | -0.03 | 0.98 | Q99K05  | Protein unc-45 homolog A                                                | Unc45a   | 4371 | 17 | 17 | 17  | 21.3  | 21.3  | 21.3   | 103.45 | 0.0000 | 73.599    | 19020000  | 144   | 15.80 | 15.35 | 15.92 | 15.63 | 16.09 | 15.49 | 15.67 |
| 0.071 | -0.03 | 0.98 | Q9DBL7  | Bifunctional coenzyme A synthase,Phosphopantetheine adenylyltransferase | Coasy    | 5161 | 13 | 13 | 13  | 35.7  | 35.7  | 35.7   | 62.022 | 0.0000 | 107.86    | 21084000  | 178   | 15.48 | 15.34 | 15.69 | 15.43 | 15.67 | 15.25 | 15.79 |
| 0.073 | -0.03 | 0.98 | P47199  | Quinone oxidoreductase                                                  | Cyzc     | 1114 | 6  | 6  | 6   | 29.3  | 29.3  | 29.3   | 35.268 | 0.0000 | 24.786    | 8607100   | 158   | 14.56 | 14.62 | 14.64 | 14.43 | 14.55 | 14.51 | 14.57 |
| 0.056 | -0.03 | 0.98 | Q4VBES  | WD repeat-containing protein 15                                         | Wdr18    | 2071 | 10 | 10 | 10  | 28.3  | 28.3  | 28.3   | 40.513 | 0.0000 | 45.163    | 10870000  | 113   | 15.76 | 15.66 | 15.32 | 15.74 | 15.64 | 15.34 | 15.24 |
| 0.132 | -0.03 | 0.98 | Q9JWR1  | Sideroflexin-1                                                          | Sfn1     | 4344 | 18 | 17 | 17  | 58.4  | 58.4  | 58.4   | 35.640 | 0.0000 | 323.31    | 91820000  | 550   | 17.47 | 17.11 | 17.28 | 17.40 | 17.24 | 17.35 | 17.30 |
| 0.047 | -0.03 | 0.98 | P07091  | Protein S100-A4                                                         | S100a4   | 667  | 13 | 13 | 13  | 64.4  | 64.4  | 64.4   | 11.21  | 0.0000 | 87.084    | 40630000  | 529   | 20.83 | 21.41 | 21.26 | 21.63 | 20.79 | 21.07 | 21.33 |
| 0.006 | -0.03 | 0.98 | Q3TC93  | HCLS1-binding protein 3                                                 | Hs1bp3   | 1825 | 12 | 12 | 12  | 48.4  | 48.4  | 48.4   | 43.691 | 0.0000 | 96.237    | 16284000  | 206   | 14.98 | 15.16 | 15.05 | 15.35 | 14.85 | 15.05 | 15.14 |
| 0.107 | -0.04 | 0.98 | Q8BMJ2  | Leucine-RNA ligase, cytoplasmic                                         | Lars     | 5140 | 66 | 66 | 66  | 57.7  | 57.7  | 57.7   | 134.19 | 0.0000 | 323.31    | 175430000 | 1161  | 17.49 | 17.39 | 17.52 | 17.71 | 17.24 | 17.51 | 17.54 |
| 0.179 | -0.04 | 0.98 | Q9B842  | P.ViE, RhoGDPF, and PH domain-containing protein 3                      | P3d3     | 572  | 29 | 28 | 28  | 62.4  | 62.4  | 62.4   | 60.823 | 0.0000 | 323.31    | 76590000  | 584   | 16.96 | 16.73 | 16.86 | 16.84 | 16.73 | 16.86 | 16.73 |
| 0.273 | -0.04 | 0.98 | P68404  | Protein kinase C beta type                                              | Prkcb    | 1520 | 24 | 24 | 24  | 42.6  | 42.6  | 42.6   | 76.75  | 0.0000 | 66.789    | 56240000  | 390   | 16.87 | 16.72 | 16.77 | 16.74 | 16.88 | 16.85 | 16.81 |
| 0.115 | -0.04 | 0.98 | Q9Z0P5  | Twinfilin-2                                                             | Twf2     | 5780 | 25 | 22 | 22  | 77.4  | 77.4  | 77.4   | 39.47  | 0.0000 | 323.31    | 147000000 | 642   | 17.71 | 18.12 | 17.96 | 17.83 | 18.06 | 17.98 | 17.99 |
| 0.027 | -0.04 | 0.98 | Q8BTf3  | E3 ubiquitin-protein ligase UBR5                                        | Ubr5     | 2811 | 12 | 12 | 12  | 8.5   | 8.5   | 8.5    | 308.35 | 0.0000 | 80.171    | 6326300   | 85    | 14.32 | 14.16 | 14.41 | 14.73 | 13.17 | 14.73 | 14.70 |
| 0.180 | -0.04 | 0.98 | E8ZRY6  | RNA-binding protein 25                                                  | Rbn25    | 89   | 26 | 26 | 26  | 32.6  | 32.6  | 32.6   | 99.551 | 0.0000 | 180.75    | 53380000  | 353   | 15.87 | 16.05 | 15.95 | 16.00 | 16.11 | 15.98 | 15.94 |
| 0.031 | -0.04 | 0.97 | P56371  | Ras-related protein Rab-4A                                              | Rab4a    | 1279 | 4  | 3  | 3   | 25.2  | 18.8  | 18.8   | 24.08  | 0.0000 | 25.87     | 2061100   | 22    | 13.92 | 13.50 | 13.92 | 12.96 | 14.51 | 13.79 | 14.03 |
| 0.044 | -0.04 | 0.97 | Q5PRF0  | HEAT repeat-containing protein 5A                                       | Heat5a   | 2123 | 16 | 16 | 16  | 12.4  | 12.4  | 12.4   | 210.89 | 0.0000 | 182.45    | 9875800   | 139   | 14.63 | 14.30 | 14.29 | 14.41 | 15.07 | 13.94 | 14.36 |
| 0.070 | -0.04 | 0.97 | Q98LJ0  | CTTNBP2 N-terminal-like protein                                         | Ctnb2nl  | 4435 | 19 | 19 | 19  | 37.9  | 37.9  | 37.9   | 69.84  | 0.0000 | 54.139    | 14515000  | 165   | 14.67 | 14.83 | 15.14 | 15.10 | 14.66 | 14.74 | 15.16 |
| 0.078 | -0.04 | 0.97 | E9D912  | Rap1gdr1                                                                | Rap1gdr1 | 251  | 23 | 23 | 22  | 47.3  | 47.3  | 47.3   | 46.3   | 0.0000 | 226.14    | 65834000  | 370   | 16.90 | 16.95 | 16.93 | 16.86 | 16.86 | 16.65 | 17.32 |
| 0.170 | -0.04 | 0.97 | Q8C147  | Dedicator of cytokinesis protein 8                                      | Dock8    | 3352 | 69 | 69 | 67  | 38.1  | 37.8  | 37.8   | 238.98 | 0.0000 | 323.31    | 130060000 | 1155  | 16.88 | 16.42 | 16.68 | 16.65 | 16.64 | 16.70 | 16.53 |
| 0.074 | -0.04 | 0.97 | Q6KCD5  | Nipped-B-like protein                                                   | Nlbp1    | 2522 | 16 | 16 | 15  | 8     | 6.6   | 6.6    | 315.45 | 0.0000 | 32.677    | 10698000  | 74    | 15.22 | 15.38 | 14.82 | 15.14 | 15.46 | 15.09 | 15.02 |
| 0.156 | -0.04 | 0.97 | Q8R1B4  | Eukaryotic translation initiation factor 3 subunit C                    | Eif3c    | 3783 | 54 | 54 | 54  | 52.9  | 52.9  | 52.9   | 105.53 | 0.0000 | 323.31    | 197520000 | 1189  | 17.83 | 17.53 | 17.67 | 17.64 | 17.81 | 17.62 | 17.79 |
| 0.271 | -0.04 | 0.97 | Q0B573  | Galeitin-9                                                              | Lgals9   | 487  | 12 | 12 | 12  | 48.7  | 48.7  | 48.7   | 40.035 | 0.0000 | 223.23    | 57999000  | 214   | 16.89 | 16.92 | 16.91 | 16.81 | 17.01 | 16.98 | 17.00 |
| 0.076 | -0.04 | 0.97 | Q9P449  | Phosphatidylinositol 3,4,5-trisphosphate 5-phosphatase 2                | Insip1   | 2668 | 41 | 39 | 37  | 40.1  | 38.7  | 38.9   | 138.97 | 0.0000 | 323.31    | 72589000  | 414   | 17.21 | 16.94 | 17.30 | 17.54 | 17.15 | 16.91 | 17.14 |
| 0.032 | -0.04 | 0.97 | Q8BH57  | WD repeat-containing protein 48                                         | Wdr48    | 3013 | 11 | 11 | 11  | 24.7  | 24.7  | 24.7   | 76.006 | 0.0000 | 51.712    | 8446800   | 67    | 14.60 | 13.62 | 14.78 | 15.07 | 14.24 | 14.00 | 14.20 |
| 0.056 | -0.04 | 0.97 | Q9BJX4  | Eukaryotic translation initiation factor 3 subunit M                    | Eif3m    | 4354 | 16 | 16 | 16  | 55.3  | 55.3  | 55.3   | 42.516 | 0.0000 | 291.95    | 63672000  | 243   | 18.97 | 18.41 | 18.40 | 18.31 | 18.70 | 18.48 | 19.04 |
| 0.107 | -0.04 | 0.97 | P48410  | ATP-binding cassette sub-family D member 1                              | Abcd1    | 372  | 22 | 22 | 22  | 32.5  | 32.5  | 32.5   | 114.23 | 0.0000 | 145.023   | 110510000 | 346   | 16.55 | 16.46 | 16.48 | 16.61 | 16.51 | 16.24 | 16.56 |
| 0.031 | -0.04 | 0.97 | P62849  | 40S ribosomal protein S24                                               | S24      | 1453 | 13 | 13 | 13  | 52.6  | 52.6  | 52.6   | 15.423 | 0.0000 | 253.15    | 24860000  | 589   | 19.46 | 19.60 | 19.62 | 19.42 | 19.86 | 19.62 | 20.61 |
| 0.206 | -0.04 | 0.97 | Q99LF4  | tRNA-splicing ligase RtcB homolog                                       | Rtcb     | 4425 | 28 | 28 | 28  | 65.1  | 65.1  | 65.1   | 55.249 | 0.0000 | 323.31    | 159700000 | 887   | 17.70 | 17.69 | 17.67 | 17.67 | 17.91 | 17.62 | 17.71 |
| 0.044 | -0.04 | 0.97 | Q6NV83  | U2 snRNP-associated SURF motif-containing protein                       | U2surp   | 2530 | 20 | 20 | 19  | 26.6  | 26.6  | 26.6   | 118.26 | 0.0000 | 50.1      | 21338000  | 226   | 15.11 | 15.27 | 15.17 | 14.79 | 14.73 | 15.59 | 15.79 |
| 0.053 | -0.04 | 0.97 | P62702  | 40S ribosomal protein S4, X isoform                                     | Rps4x    | 1436 | 34 | 34 | 34  | 79.5  | 79.5  | 79.5   | 29.597 | 0.0000 | 323.31    | 663610000 | 1226  | 19.37 | 19.47 | 19.70 | 19.66 | 19.80 | 19.86 | 19.79 |
| 0.288 | -0.04 | 0.97 | A2A474  | Dedicator of cytokinesis protein 11                                     | Dock11   | 25   | 42 | 42 | 42  | 25.5  | 25.5  | 25.5   | 23.777 | 0.0000 | 183.54    | 51875000  | 528   | 15.92 | 15.91 | 15.92 | 15.87 | 16.05 | 15.92 | 16.05 |
| 0.113 | -0.04 | 0.97 | P35278  | Ras-related protein Rab-5C                                              | Rab5c    | 1033 | 17 | 17 | 12  | 75    | 55.6  | 23.412 | 0.0000 | 259.78 | 245490000 | 726       | 19.10 | 18.82 | 18.82 | 18.71 | 19.17 | 18.92 | 19.00 |       |
| 0.049 | -0.04 | 0.97 | Q00993  | Tyrosine-protein kinase receptor UFO                                    | Axl      | 1702 | 9  | 9  | 8   | 15.2  | 15.2  | 13.5   | 98.19  | 0.0000 | 26.476    | 3799700   | 31    | 13.62 | 13.09 | 13.74 | 13.72 | 13.78 | 12.87 | 13.73 |
| 0.129 | -0.04 | 0.97 | Q9QZL0  | Receptor-interacting serine/threonine-protein kinase 3                  | Ripk3    | 5600 | 15 | 15 | 15  | 39.3  | 39.3  | 39.3   | 53.322 | 0.0000 | 151.8     | 37977000  | 245   | 16.49 | 16.45 | 16.58 | 16.62 | 16.76 | 16.27 | 16.55 |
| 0.056 | -0.04 | 0.97 | Q5DTM8  | U3 ubiquitin-protein ligase BRE1A                                       | Bre1a    | 205  | 19 | 19 | 19  | 113.2 | 113.2 | 113.2  | 49.7   | 0.0000 | 86.923    | 158890000 | 523   | 16.47 | 15.82 | 15.82 | 16.47 | 15.95 | 15.98 | 15.82 |
| 0.085 | -0.04 | 0.97 | Q5UIY5  | Serine protease HTRA2, mitochondrial                                    | Htra2    | 5412 | 14 | 14 | 13  | 37.1  | 37.1  | 37.1   | 40.348 | 0.0000 | 120.87    | 369510000 | 213   | 16.33 | 16.96 | 16.65 | 16.45 | 16.73 | 16.68 | 16.90 |
| 0.149 | -0.04 | 0.97 | P50544  | Very long-chain specific acyl-CoA dehydrogenase, mitochondrial          | Acadvl   | 1187 | 30 | 30 | 30  | 61.4  | 61.4  | 61.4   | 70.875 | 0.0000 | 323.31    | 105580000 | 792   | 17.52 | 17.18 | 17.33 | 17.25 | 17.44 | 17.31 | 17.55 |
| 0.028 | -0.04 | 0.97 | Q3UJ0M1 | Trafficking protein particle complex subunit 9                          | Trappc9  | 1896 | 7  | 7  | 7   | 7.2   | 7.2   | 7.2    | 126.23 | 0.0000 | 16.477    | 3629500   | 38    | 13.92 | 13.82 | 13.27 | 13.43 | 14.98 | 13.47 | 12.97 |
| 0.110 | -0.04 | 0.97 | P28491  | High affinity immunoglobulin epsilon receptor subunit gamma             | Igfb1g   | 859  | 32 | 32 | 32  | 32.6  | 32.6  | 32.6   | 9.6523 | 0.0000 | 77.006    | 240180000 | 72    | 19.71 | 19.36 | 19.78 | 19.76 | 19.36 | 19.78 | 19.60 |
| 0.096 | -0.05 | 0.97 | P51150  | Ras-related protein Rab-7A                                              | Rab7a    | 1191 | 25 | 25 | 25  | 87.2  | 87.2  | 87.2   | 23.489 | 0.0000 | 323.31    | 444590000 | 942   | 20.08 | 20.05 | 19.91 | 19.81 | 19.83 | 20.27 | 20.33 |
| 0.127 | -0.05 | 0.97 | Q05512  | Serine/threonine-protein kinase MARK2                                   | Mark2    | 1740 | 15 | 15 | 11  | 25.8  | 25.8  | 20     | 86.305 | 0.0000 | 86.57     | 21568000  | 215   | 15.26 | 14.99 | 15.27 | 15.27 | 15.45 | 15.09 | 15.06 |
| 0.052 | -0.05 | 0.97 | Q0D110  | 5-formyltetrahydrofolate cyclo-ligase                                   | Mthfs    | 4892 | 8  | 8  | 8   | 38.9  | 38.9  | 38.9   | 23.201 | 0.0000 | 21.148    | 7921500   | 67    | 13.44 | 14.01 | 14.06 | 13.86 | 13.46 | 14.48 | 13.73 |
| 0.136 | -0.05 | 0.97 | Q9WTR1  | Transient receptor potential cation channel subfamily V member 2        | Tprv2    | 5684 | 22 | 22 | 22  | 32.7  | 32.7  | 32.7   | 85.964 | 0.0000 | 252.58    | 82567000  | 525   | 17.08 | 16.89 | 17.01 | 16.79 | 17.24 | 17.16 | 16.97 |
| 0.073 | -0.05 | 0.97 | Q8P935  | Protein-methionine sulfotransferase MICALL1                             | Micall1  | 386  | 29 | 29 | 29  | 36.3  | 36.3  | 36.3   | 14.502 | 0.0000 | 145.02    | 47583000  | 469   | 16.07 | 15.78 | 15.84 | 16.07 | 15.85 | 16.92 | 16.70 |
| 0.030 | -0.05 | 0.97 | Q6Z245  | Son of sevenless homolog 1                                              | Sos1     | 2372 | 7  | 5  | 8.4 | 8.7   | 6.1   | 150.88 | 0.0000 | 15.858 | 5518500   | 19        | 14.30 | 13.48 | 14.94 | 13.74 | 15.09 | 13.81 | 14.51 |       |
| 0.025 | -0.05 | 0.97 | Q54879  | High mobility group protein B3                                          | Hmgb3    | 429  | 17 | 15 | 15  | 58    | 53    | 53     | 23.01  | 0.0000 | 91.998    | 13268000  | 121   | 15.16 | 16.26 | 16.74 | 16.85 | 14.51 | 15.72 | 15.97 |
| 0.026 | -0.05 | 0.97 | Q8P6G6  | Guanine nucleotide-binding protein-like 3-like protein                  | Gnl3     | 2637 | 3  | 3  | 3   | 9     | 9     | 9      | 65.194 | 0.0000 | 10.726    | 3282800   | 15    | 14.17 | 14.10 | 14.43 | 15.28 | 13.42 | 15.07 | 13.36 |
| 0.131 | -0.05 | 0.97 | Q8C0N6  | Thioredoxin-like protein 1                                              | Txn1l    | 346  | 11 | 11 | 11  | 63    | 63    | 63     | 32.237 | 0.0000 | 153.21    | 62690000  | 204   | 16.45 | 16.60 | 16.68 | 16.92 | 16.51 | 16.64 | 16.70 |
| 0.071 | -0.05 | 0.97 | Q7TMM9  | Tubulin beta-2A chain                                                   | Tub2a    | 2747 | 37 | 9  | 2   | 73    | 28.8  | 3.6    | 49.906 | 0.0000 | 210.43    | 95885000  | 206   | 18.13 | 17.88 | 18.34 | 17.67 | 18.50 | 18.18 | 18.30 |
| 0.100 | -0.05 | 0.97 | Q7QTQ0  | Ataxin-2-like protein                                                   | Atxn2l   | 2774 | 12 | 12 | 12  | 17.6  | 17.6  | 110.65 | 0.0000 | 48.943 | 32251000  | 225       | 16.71 | 16.80 | 16.84 | 16.61 | 16.57 | 17.15 | 16.99 |       |
| 0.112 | -0.05 | 0.97 | Q91V61  | Sideroflexin-3                                                          | Sfn3     | 4047 | 24 | 24 | 24  | 71.7  | 65.7  | 35.406 | 0.0000 | 323.31 | 151060000 | 794       | 18.04 | 17.63 | 17.79 | 18    |       |       |       |       |

|       |       |             |                                                                 |          |      |    |    |    |       |       |        |         |        |          |            |       |         |       |       |       |       |       |       |
|-------|-------|-------------|-----------------------------------------------------------------|----------|------|----|----|----|-------|-------|--------|---------|--------|----------|------------|-------|---------|-------|-------|-------|-------|-------|-------|
| 0.166 | -0.06 | 0.96 Q91Y10 | Argininosuccinate lyase                                         | Asl      | 4158 | 32 | 32 | 32 | 64    | 64    | 64     | 51.739  | 0.0000 | 323.31   | 121490000  | 654   | 17.52   | 17.26 | 17.14 | 17.45 | 17.16 | 17.59 | 17.28 |
| 0.207 | -0.06 | 0.96 Q1HF20 | IRNA (cytosine(34)-C(5))-methyltransferase                      | Nsun2    | 1795 | 31 | 31 | 31 | 47.7  | 47.7  | 47.7   | 85.451  | 0.0000 | 176.73   | 79640000   | 642   | 16.95   | 16.68 | 16.88 | 16.87 | 17.14 | 16.76 | 16.83 |
| 0.222 | -0.06 | 0.96 Q9D1E6 | Tubulin-folding cofactor B                                      | Tbcb     | 4908 | 18 | 18 | 18 | 80.7  | 80.7  | 80.7   | 27.385  | 0.0000 | 183.8    | 55969600   | 416   | 16.99   | 17.19 | 17.38 | 17.40 | 17.20 | 17.15 | 17.28 |
| 0.210 | -0.06 | 0.96 Q9WTX8 | Mitotic spindle assembly checkpoint protein MAD1                | Mad11    | 5693 | 9  | 9  | 9  | 17.3  | 17.3  | 17.3   | 83.54   | 0.0000 | 60.005   | 64679000   | 112   | 14.61   | 14.20 | 14.16 | 15.04 | 13.96 | 14.52 | 14.03 |
| 0.074 | -0.06 | 0.96 Q8U9P3 | Histone H4 acetyltransferase KAT5                               | Kat5     | 2634 | 13 | 13 | 13 | 17.2  | 17.2  | 17.2   | 104.033 | 0.0000 | 45.291   | 144820000  | 153   | 14.58   | 14.29 | 14.54 | 15.28 | 14.56 | 14.80 | 14.87 |
| 0.072 | -0.06 | 0.96 Q8ESX5 | HIACA ribonucleoprotein complex subunit 4                       | Dic1     | 2580 | 20 | 20 | 20 | 47.3  | 47.3  | 47.3   | 57.401  | 0.0000 | 187.03   | 39135000   | 354   | 16.13   | 15.93 | 16.22 | 16.26 | 15.92 | 16.26 | 16.10 |
| 0.413 | -0.06 | 0.96 P09411 | Phosphoglycerate kinase 1                                       | Pgk1     | 696  | 62 | 62 | 54 | 99.5  | 99.5  | 97.4   | 44.55   | 0.0000 | 323.31   | 3891600000 | 4039  | 21.66   | 21.64 | 21.75 | 21.86 | 21.79 | 21.73 | 21.61 |
| 0.196 | -0.06 | 0.96 Q9QYJ0 | DnaJ homolog subfamily A member 2                               | Dnaaj2   | 5575 | 17 | 17 | 17 | 50.2  | 50.2  | 50.2   | 45.745  | 0.0000 | 96.681   | 42979000   | 357   | 16.28   | 16.41 | 16.47 | 16.28 | 16.68 | 16.29 | 16.97 |
| 0.232 | -0.06 | 0.96 P82343 | N-acetylglucosamine 2-epimerase                                 | Rentp    | 1599 | 20 | 20 | 20 | 38.8  | 38.8  | 38.8   | 49.771  | 0.0000 | 323.31   | 90722000   | 579   | 17.65   | 17.44 | 17.23 | 17.52 | 17.61 | 17.48 | 17.41 |
| 0.030 | -0.07 | 0.96 Q9D2E2 | Target of EGR1 protein 1                                        | Tce1     | 4841 | 3  | 3  | 3  | 11.7  | 11.7  | 11.7   | 59.87   | 0.0000 | 21.574   | 1965000    | 36    | 13.92   | 13.67 | 14.44 | 14.87 | 12.26 | 14.60 | 14.57 |
| 0.032 | -0.07 | 0.96 Q9D288 | Cell growth-regulating nuclear protein                          | Lyar     | 1763 | 12 | 12 | 12 | 31.7  | 31.7  | 31.7   | 43.735  | 0.0000 | 46.755   | 6515000    | 48    | 13.48   | 15.02 | 13.88 | 15.34 | 14.68 | 13.38 | 13.36 |
| 0.024 | -0.07 | 0.96 Q9JL00 | CD2-associated protein                                          | Cd2ap    | 5487 | 14 | 14 | 13 | 34.5  | 34.5  | 31.4   | 70.449  | 0.0000 | 56.774   | 3779500    | 25    | 10.85   | 14.10 | 11.17 | 11.56 | 12.71 | 11.64 | 12.52 |
| 0.039 | -0.07 | 0.96 Q8B851 | Putative hydrolase RBBP9                                        | Rbbp9    | 577  | 7  | 7  | 6  | 63.4  | 63.4  | 60.8   | 20.911  | 0.0000 | 26.017   | 3492800    | 32    | 14.03   | 13.75 | 14.19 | 12.83 | 15.15 | 13.89 | 14.41 |
| 0.110 | -0.07 | 0.96 Q9DCT1 | 1,5-anhydro-D-fructose reductase                                | Afr1a2   | 5229 | 12 | 12 | 12 | 48.8  | 48.8  | 48.8   | 34.446  | 0.0000 | 75.477   | 21224000   | 190   | 16.03   | 15.93 | 16.40 | 15.68 | 15.96 | 15.71 |       |
| 0.475 | -0.07 | 0.96 Q9WTM5 | RuvB-like 2                                                     | Ruvb12   | 5679 | 33 | 33 | 33 | 72.6  | 72.6  | 72.6   | 51.112  | 0.0000 | 323.31   | 113950000  | 676   | 17.36   | 17.31 | 17.26 | 17.51 | 17.31 | 17.39 | 17.30 |
| 0.315 | -0.07 | 0.95 P84091 | AP-2 complex subunit mu                                         | Ap2m1    | 1608 | 30 | 30 | 30 | 62.5  | 62.5  | 62.5   | 49.654  | 0.0000 | 133.45   | 15878000   | 635   | 17.99   | 17.71 | 17.91 | 17.96 | 17.83 | 18.05 | 17.97 |
| 0.174 | -0.07 | 0.95 Q9CZK8 | 40S ribosomal protein S19                                       | Rps19    | 4846 | 23 | 23 | 23 | 73.1  | 73.1  | 73.1   | 16.085  | 0.0000 | 214.68   | 39895000   | 688   | 19.47   | 19.60 | 19.99 | 19.66 | 19.65 | 19.98 | 19.85 |
| 0.210 | -0.07 | 0.95 Q8B9K4 | Cytoskeleton-associated protein 4                               | Ckap4    | 3142 | 48 | 48 | 48 | 74.6  | 74.6  | 74.6   | 109.05  | 0.0000 | 323.31   | 16238000   | 1168  | 16.90   | 16.65 | 16.98 | 16.68 | 17.05 | 16.72 |       |
| 0.170 | -0.07 | 0.95 P61620 | Protein transport protein SecE1 subunit alpha isoform 1         | SecE1a1  | 1387 | 11 | 11 | 11 | 29.2  | 29.2  | 29.2   | 52.264  | 0.0000 | 128.35   | 6183000    | 322   | 17.67   | 17.98 | 17.47 | 17.84 | 17.94 | 17.73 | 17.58 |
| 0.082 | -0.07 | 0.95 P70261 | Paladin                                                         | Pald1    | 1541 | 10 | 10 | 10 | 16.8  | 16.8  | 16.8   | 96.739  | 0.0000 | 48.271   | 9570400    | 122   | 14.97   | 14.45 | 14.49 | 15.12 | 14.22 | 15.04 | 14.45 |
| 0.606 | -0.07 | 0.95 P47754 | F-actin-capping protein subunit alpha-2                         | Capza2   | 1120 | 27 | 27 | 22 | 89.2  | 89.2  | 79     | 32.967  | 0.0000 | 323.31   | 44577000   | 1001  | 20.01   | 19.87 | 19.95 | 20.04 | 20.07 | 20.01 | 19.92 |
| 0.083 | -0.07 | 0.95 Q92180 | Conserved oligomeric Golgi complex subunit 1                    | Cog1     | 5800 | 16 | 16 | 16 | 25.2  | 25.2  | 25.2   | 109.05  | 0.0000 | 136.35   | 20233000   | 263   | 15.46   | 15.75 | 15.75 | 16.05 | 14.97 | 15.56 | 15.90 |
| 0.091 | -0.07 | 0.95 Q9ER02 | Striatin-3                                                      | Stri3    | 5310 | 11 | 10 | 8  | 16.2  | 14.9  | 13.6   | 87.140  | 0.0000 | 30.312   | 8013100    | 62    | 14.14   | 14.75 | 15.24 | 14.74 | 14.80 | 14.87 | 14.71 |
| 0.078 | -0.07 | 0.95 Q08600 | Endonuclease G, mitochondrial                                   | Endog    | 280  | 4  | 4  | 4  | 19    | 19    | 19     | 32.19   | 0.0000 | 11.942   | 3697100    | 30    | 14.36   | 14.39 | 14.77 | 14.76 | 13.97 | 14.43 | 15.13 |
| 0.196 | -0.07 | 0.95 P24270 | Catalase                                                        | Cat      | 895  | 49 | 49 | 37 | 80.3  | 80.3  | 64.1   | 59.795  | 0.0000 | 323.31   | 87816000   | 2253  | 19.93   | 20.00 | 20.25 | 19.96 | 19.97 | 20.30 | 20.28 |
| 0.318 | -0.07 | 0.95 P97807 | Fumarate hydratase, mitochondrial                               | Fh       | 1673 | 27 | 27 | 27 | 70.8  | 70.8  | 54.356 | 17.768  | 0.0000 | 323.31   | 18816000   | 762   | 18.63   | 18.62 | 18.99 | 18.82 | 18.69 | 18.61 | 18.77 |
| 0.526 | -0.07 | 0.95 P62270 | 40S ribosomal protein S18                                       | Rps18    | 1413 | 25 | 25 | 25 | 70.4  | 70.4  | 70.4   | 17.918  | 0.0000 | 323.31   | 52605000   | 1004  | 19.89   | 19.73 | 19.89 | 19.84 | 19.97 | 19.91 | 19.79 |
| 0.195 | -0.07 | 0.95 Q60668 | Heterogeneous nuclear ribonucleoprotein D0                      | Hnmpd    | 2191 | 23 | 23 | 22 | 47.9  | 47.9  | 45.6   | 38.354  | 0.0000 | 323.31   | 15874000   | 708   | 18.87   | 19.20 | 19.32 | 19.30 | 19.01 | 19.31 | 19.17 |
| 0.069 | -0.07 | 0.95 P58404 | Striatin-4                                                      | Stri4    | 1315 | 8  | 5  | 5  | 12.9  | 12.9  | 10.1   | 81.644  | 0.0000 | 12.975   | 2885900    | 28    | 13.91   | 14.55 | 14.83 | 14.68 | 13.87 | 14.45 | 15.00 |
| 0.425 | -0.07 | 0.95 Q9PGF7 | Exocyst complex component 8                                     | Exoc8    | 2635 | 23 | 23 | 23 | 33.1  | 33.1  | 33.1   | 81.034  | 0.0000 | 159.77   | 42112000   | 367   | 16.41   | 16.23 | 16.35 | 16.54 | 16.32 | 16.38 | 16.36 |
| 0.160 | -0.07 | 0.95 Q9QY42 | Mitochondrial import receptor subunit TOM40 homolog             | Tom40    | 5563 | 9  | 9  | 9  | 36.3  | 36.3  | 37.895 | 17.662  | 0.0000 | 13.92    | 2368800    | 164   | 16.81   | 16.77 | 16.63 | 16.56 | 16.19 | 16.54 | 16.50 |
| 0.148 | -0.07 | 0.95 Q6Q770 | Syntaxin-binding protein 3                                      | Stxbp3   | 2525 | 30 | 30 | 29 | 54.2  | 54.2  | 53     | 67.942  | 0.0000 | 33.37    | 65371000   | 595   | 16.60   | 16.38 | 16.36 | 16.56 | 16.32 | 16.42 | 16.53 |
| 0.048 | -0.07 | 0.95 Q9R006 | Actin-related protein 2/3 complex subunit 1A                    | Arcp1a   | 5637 | 7  | 4  | 4  | 25.1  | 16.5  | 16.5   | 41.626  | 0.0000 | 20.053   | 2765700    | 40    | 13.93   | 13.15 | 13.93 | 14.50 | 13.65 | 14.13 | 12.68 |
| 0.245 | -0.07 | 0.95 Q3TR11 | Trafficking protein particle complex subunit 13                 | Trappc13 | 1848 | 6  | 6  | 6  | 22.3  | 22.3  | 22.3   | 48.676  | 0.0000 | 57.481   | 1031900    | 82    | 15.22   | 15.35 | 15.41 | 15.23 | 15.68 | 15.25 | 15.63 |
| 0.076 | -0.07 | 0.95 Q8B230 | Protein-arginine kinase D2                                      | Pkcd2    | 3303 | 4  | 4  | 4  | 4.9   | 4.9   | 4.9    | 96.541  | 0.0000 | 10.956   | 19100      | 13    | 13.18   | 12.65 | 16.93 | 12.98 | 12.75 | 13.68 | 12.72 |
| 0.058 | -0.07 | 0.95 Q3S381 | Acidic leucine-rich nuclear phosphoprotein 32 family member A   | Anp32a   | 365  | 14 | 10 | 10 | 40.5  | 36.4  | 36.4   | 28.537  | 0.0000 | 42.021   | 14264000   | 127   | 14.56   | 15.84 | 15.74 | 16.08 | 15.01 | 15.51 | 15.21 |
| 0.248 | -0.07 | 0.95 Q9JLJ2 | 4-trimethylaminobutylaldehyde dehydrogenase                     | Aldh9a1  | 5483 | 40 | 40 | 40 | 76.7  | 76.7  | 76.7   | 53.514  | 0.0000 | 323.31   | 32285000   | 1317  | 18.70   | 18.37 | 18.50 | 18.74 | 18.73 | 18.47 | 18.46 |
| 0.053 | -0.07 | 0.95 Q9CP03 | Mitochondrial import receptor subunit TOM22 homolog             | Tom22    | 4526 | 6  | 6  | 6  | 50    | 50    | 50     | 15.537  | 0.0000 | 104.83   | 75994000   | 201   | 18.15   | 18.36 | 18.58 | 17.87 | 18.87 | 17.65 | 19.37 |
| 0.154 | -0.07 | 0.95 P57776 | Proteasome factor 1-delta                                       | Pf1d1    | 1293 | 56 | 56 | 56 | 120.6 | 120.6 | 120.6  | 31.293  | 0.0000 | 32.41    | 9576000    | 428   | 17.41   | 17.75 | 17.41 | 17.95 | 17.41 | 17.75 | 17.41 |
| 0.272 | -0.07 | 0.95 P2R063 | Mitochondrial subunit beta type-2                               | Psmb8    | 945  | 20 | 20 | 20 | 67.8  | 67.8  | 67.8   | 30.26   | 0.0000 | 236.09   | 12219000   | 594   | 15.54   | 18.35 | 18.40 | 18.46 | 18.72 | 18.30 | 18.54 |
| 0.293 | -0.08 | 0.95 Q99L27 | GMP reductase 2                                                 | Gmpr2    | 4405 | 16 | 16 | 14 | 50.3  | 50.3  | 44.3   | 38.018  | 0.0000 | 99.388   | 38036000   | 240   | 16.27   | 16.28 | 16.40 | 16.44 | 16.60 | 16.20 | 16.33 |
| 0.073 | -0.08 | 0.95 Q9JL80 | Ribosome production factor 2 homolog                            | Rpf2     | 5419 | 5  | 5  | 5  | 21.6  | 21.6  | 21.6   | 35.363  | 0.0000 | 15.845   | 6378700    | 81    | 14.42   | 14.52 | 14.77 | 13.99 | 14.42 | 14.73 | 15.45 |
| 0.141 | -0.08 | 0.95 Q54782 | Epididymis-specific alpha-mannosidase                           | Man2b2   | 4241 | 27 | 27 | 27 | 29.7  | 29.7  | 29.7   | 115.61  | 0.0000 | 280.68   | 69844000   | 533   | 16.72   | 16.96 | 16.76 | 16.58 | 17.26 | 16.54 | 16.65 |
| 0.252 | -0.08 | 0.95 Q3TRM6 | Histone H3                                                      | H3c      | 1872 | 52 | 52 | 52 | 69.6  | 69.6  | 100.1  | 0.0000  | 323.31 | 59432000 | 1766       | 19.42 | 19.13   | 19.43 | 19.22 | 19.19 | 19.30 | 19.40 |       |
| 0.186 | -0.08 | 0.95 Q3UW53 | Protein Niban                                                   | Fam129a  | 4020 | 49 | 49 | 49 | 58.4  | 58.4  | 56.4   | 102.65  | 0.0000 | 323.31   | 18389000   | 824   | 19.25   | 18.79 | 18.97 | 19.29 | 18.96 | 19.20 | 18.88 |
| 0.046 | -0.08 | 0.95 P15533 | Tripartite motif-containing protein 30A                         | Trim30a  | 798  | 7  | 7  | 7  | 19.4  | 19.4  | 19.4   | 57.329  | 0.0000 | 21.242   | 2840000    | 41    | 12.41   | 13.79 | 13.26 | 13.76 | 12.69 | 14.09 | 12.38 |
| 0.083 | -0.08 | 0.95 Q9CVW4 | Protein unc-53 homolog B1                                       | Unc53b1  | 3933 | 5  | 5  | 5  | 8.9   | 8.9   | 8.9    | 66.98   | 0.0000 | 23.179   | 1875600    | 128   | 16.41   | 16.13 | 16.96 | 16.21 | 17.24 | 16.54 | 16.33 |
| 0.119 | -0.08 | 0.95 Q9B9J5 | Actinophagin protein 5                                          | Atg5     | 433  | 30 | 30 | 30 | 30.9  | 30.9  | 30.9   | 32.402  | 0.0000 | 110.29   | 1245100    | 154   | 15.81   | 14.92 | 15.21 | 15.61 | 15.14 | 14.65 | 15.09 |
| 0.061 | -0.08 | 0.95 Q8BWV4 | La-related protein 4                                            | Larp4    | 3268 | 6  | 6  | 6  | 11.8  | 11.8  | 11.8   | 79.763  | 0.0000 | 29.883   | 4898100    | 54    | 13.64   | 13.94 | 14.11 | 14.59 | 12.96 | 13.91 | 14.44 |
| 0.134 | -0.08 | 0.95 Q9CWL8 | Beta-catenin-like protein 1                                     | Ctnnb1   | 4720 | 14 | 14 | 13 | 26.5  | 26.5  | 26.5   | 64.979  | 0.0000 | 35.224   | 2435000    | 188   | 16.72   | 16.63 | 16.60 | 17.14 | 16.25 | 16.71 | 16.82 |
| 0.212 | -0.08 | 0.95 Q9JMV6 | Actin-related protein 2/3 complex subunit 3                     | Arcp3    | 5499 | 19 | 19 | 19 | 74.7  | 74.7  | 74.7   | 20.524  | 0.0000 | 245.03   | 25368000   | 649   | 19.98   | 20.01 | 20.12 | 20.02 | 20.45 | 20.09 | 19.89 |
| 0.322 | -0.08 | 0.95 P47809 | D3 ubiquitin-specific mitogen-activated protein kinase kinase 4 | Map3k4   | 1129 | 7  | 7  | 7  | 23.9  | 23.9  | 23.9   | 44.113  | 0.0000 | 51.518   | 20820000   | 169   | 15.81</ |       |       |       |       |       |       |

|       |       |      |            |                                                                                 |          |      |    |    |    |      |      |       |        |        |        |            |      |       |       |       |       |       |       |       |
|-------|-------|------|------------|---------------------------------------------------------------------------------|----------|------|----|----|----|------|------|-------|--------|--------|--------|------------|------|-------|-------|-------|-------|-------|-------|-------|
| 0.112 | -0.10 | 0.94 | P63158     | High mobility group protein B1                                                  | Hmgb1    | 1493 | 29 | 22 | 22 | 74   | 57.2 | 57.2  | 24.893 | 0.0000 | 207.94 | 371440000  | 935  | 18.83 | 19.71 | 19.43 | 19.92 | 19.00 | 19.25 | 19.52 |
| 0.102 | -0.10 | 0.94 | O89112     | LancC-like protein 1                                                            | Lanc1    | 606  | 10 | 10 | 10 | 27.3 | 27.3 | 27.3  | 45.341 | 0.0000 | 16.399 | 7331700    | 68   | 15.08 | 15.07 | 15.07 | 15.05 | 16.03 | 14.83 | 14.79 |
| 0.199 | -0.10 | 0.94 | Q8VC03     | Echinoderm microtubule-associated protein-like 3                                | Emi3     | 3903 | 17 | 17 | 17 | 29.9 | 29.9 | 29.9  | 95.694 | 0.0000 | 111.31 | 18365000   | 222  | 15.04 | 14.81 | 14.87 | 15.38 | 15.11 | 14.82 | 14.70 |
| 0.499 | -0.10 | 0.94 | P97770     | THUMP domain-containing protein 3                                               | Thumpd3  | 1669 | 9  | 9  | 9  | 21.4 | 21.4 | 21.4  | 56.431 | 0.0000 | 34.872 | 9861200    | 99   | 14.90 | 14.60 | 14.79 | 14.86 | 14.74 | 14.46 | 14.83 |
| 0.095 | -0.10 | 0.94 | A2AH62     | Mediator of RNA polymerase II transcription subunit 12                          | Med12    | 2454 | 7  | 7  | 7  | 7.4  | 7.4  | 7.4   | 24.561 | 0.0000 | 16.744 | 34483000   | 66   | 13.27 | 13.27 | 13.27 | 13.24 | 13.94 | 13.77 | 13.65 |
| 0.375 | -0.10 | 0.93 | Q8CBE3     | WD repeat-containing protein 37                                                 | Wdr37    | 3437 | 14 | 14 | 14 | 31.7 | 31.7 | 31.7  | 55.045 | 0.0000 | 103.88 | 17220000   | 158  | 15.38 | 15.15 | 15.34 | 15.38 | 15.54 | 15.45 | 15.77 |
| 0.278 | -0.10 | 0.93 | Q9D3P8     | Plasminogen receptor (KT)                                                       | Plgrkt   | 4968 | 9  | 9  | 9  | 41.5 | 41.5 | 41.5  | 17.261 | 0.0000 | 20.322 | 28815000   | 136  | 17.05 | 16.77 | 16.65 | 17.05 | 16.77 | 17.10 | 16.78 |
| 0.165 | -0.10 | 0.93 | Q3UQN2     | F-BAR domain only protein 2                                                     | Fcho2    | 2019 | 24 | 24 | 24 | 43.5 | 43.5 | 43.5  | 88.733 | 0.0000 | 323.31 | 34313000   | 318  | 16.16 | 15.92 | 16.11 | 16.27 | 16.59 | 16.07 | 15.71 |
| 0.290 | -0.10 | 0.93 | P98017     | Bcl-2-like protein 13                                                           | Bcl2l13  | 1329 | 5  | 5  | 5  | 18.7 | 18.7 | 18.7  | 46.719 | 0.0000 | 20.637 | 12931000   | 93   | 15.82 | 15.71 | 15.61 | 15.53 | 15.75 | 16.05 | 15.90 |
| 0.267 | -0.10 | 0.93 | Q8C650     | SecE                                                                            | SecE     | 3403 | 7  | 7  | 7  | 14.6 | 14.6 | 14.6  | 52.422 | 0.0000 | 16.329 | 6003000    | 72   | 14.67 | 14.56 | 14.62 | 14.75 | 14.97 | 14.87 | 14.39 |
| 0.194 | -0.10 | 0.93 | Q08539     | Myc box-dependent-interacting protein 1                                         | Bin1     | 1269 | 21 | 19 | 19 | 40   | 40   | 40    | 64.469 | 0.0000 | 206.57 | 51028000   | 447  | 16.80 | 16.95 | 16.86 | 17.35 | 16.58 | 16.85 | 17.09 |
| 0.479 | -0.10 | 0.93 | Q6P1B1     | Xaa-Pro aminopeptidase 1                                                        | Xnpnap1  | 2552 | 30 | 30 | 30 | 64.5 | 64.5 | 64.5  | 69.59  | 0.0000 | 242.41 | 102480000  | 517  | 17.75 | 17.81 | 17.97 | 17.80 | 17.94 | 17.93 | 18.10 |
| 0.254 | -0.10 | 0.93 | Q81ZV3     | SWI5NF-related matrix-associated actin-dependent regulator of chromatin Smcra5c | Smcra5c  | 4204 | 41 | 41 | 41 | 39   | 39   | 39    | 121.63 | 0.0000 | 162.98 | 77487000   | 623  | 16.36 | 16.22 | 16.42 | 16.44 | 16.23 | 16.27 | 16.78 |
| 0.166 | -0.10 | 0.93 | P61087     | Ubiquitin-conjugating enzyme E2 K                                               | Ubc2k    | 1370 | 17 | 17 | 17 | 79.5 | 79.5 | 79.5  | 22.406 | 0.0000 | 93.675 | 35018000   | 263  | 16.43 | 16.47 | 16.68 | 16.64 | 16.28 | 16.44 | 17.14 |
| 0.193 | -0.10 | 0.93 | P97820     | Mitogen-activated protein kinase kinase kinase 4                                | Map4k4   | 1676 | 16 | 7  | 6  | 15.7 | 8.9  | 8.4   | 140.6  | 0.0000 | 43.828 | 14089000   | 77   | 17.15 | 16.66 | 17.21 | 17.22 | 16.75 | 17.20 | 17.25 |
| 0.267 | -0.10 | 0.93 | Q35226     | 26S proteasome non-ATPase regulatory subunit 4                                  | Psm4     | 348  | 10 | 10 | 10 | 40.7 | 40.7 | 40.7  | 40.703 | 0.0000 | 135.92 | 49883000   | 391  | 16.59 | 16.71 | 17.01 | 16.28 | 16.79 | 16.75 | 16.96 |
| 0.298 | -0.10 | 0.93 | Q8K1M6     | Dynamin-1-like protein                                                          | Dnm1     | 3630 | 38 | 38 | 38 | 60.5 | 60.5 | 60.5  | 82.657 | 0.0000 | 323.31 | 119400000  | 853  | 17.32 | 16.86 | 17.12 | 17.16 | 17.28 | 17.02 | 17.35 |
| 0.098 | -0.10 | 0.93 | Q9Z2E4     | Ethanolamine-phosphate cytidylyltransferase                                     | Cytc2    | 4252 | 8  | 8  | 8  | 23.8 | 23.8 | 23.8  | 45.234 | 0.0000 | 27.084 | 8394800    | 65   | 15.26 | 15.01 | 14.37 | 15.51 | 15.16 | 14.28 | 14.97 |
| 0.504 | -0.10 | 0.93 | P60122     | RuvB-like 1                                                                     | Ruvb1    | 1351 | 30 | 30 | 29 | 75.2 | 75.2 | 75.2  | 50.213 | 0.0000 | 256.59 | 103170000  | 673  | 17.00 | 17.14 | 17.26 | 17.27 | 17.32 | 17.29 | 17.07 |
| 0.377 | -0.10 | 0.93 | Q9ER72     | Cysteine- $\gamma$ -RNA ligase, cytoplasmic                                     | Cars     | 5296 | 46 | 46 | 46 | 68.1 | 68.1 | 68.1  | 94.859 | 0.0000 | 323.31 | 101720000  | 740  | 16.90 | 16.67 | 17.02 | 17.02 | 16.77 | 17.10 | 16.97 |
| 0.815 | -0.10 | 0.93 | P26638     | Serine- $\gamma$ -RNA ligase, cytoplasmic                                       | Sars     | 927  | 46 | 46 | 46 | 69.5 | 69.5 | 69.5  | 58.388 | 0.0000 | 323.31 | 303710000  | 1413 | 18.30 | 18.32 | 18.42 | 18.36 | 18.58 | 18.44 | 18.43 |
| 0.054 | -0.10 | 0.93 | A0A0B1J1G0 | RAF proto-oncogene serine/threonine-protein kinase                              | Raf1     | 3    | 3  | 3  | 3  | 13.7 | 13.7 | 13.7  | 28.398 | 0.0000 | 11.71  | 4586100    | 45   | 14.36 | 14.59 | 13.26 | 13.32 | 13.46 | 14.51 | 13.65 |
| 0.445 | -0.10 | 0.93 | Q9GN57     | RAF proto-oncogene serine/threonine-protein kinase                              | Raf1     | 4453 | 14 | 14 | 9  | 33.8 | 33.8 | 25.5  | 72.917 | 0.0000 | 154.12 | 25857000   | 168  | 16.44 | 16.20 | 16.37 | 16.34 | 16.48 | 16.63 | 16.32 |
| 0.051 | -0.11 | 0.93 | Q9CQ79     | Thioredoxin domain-containing protein 9                                         | Txdn9    | 4571 | 5  | 5  | 5  | 31.4 | 31.4 | 31.4  | 26.259 | 0.0000 | 58.879 | 2219800    | 47   | 13.77 | 11.65 | 14.37 | 13.48 | 13.55 | 12.86 | 13.57 |
| 0.284 | -0.11 | 0.93 | P70255     | Nuclear factor 1-C type                                                         | Nfc      | 1172 | 3  | 3  | 3  | 14.1 | 14.1 | 14.1  | 48.768 | 0.0002 | 6.1073 | 1774500    | 11   | 13.51 | 13.46 | 13.63 | 13.67 | 13.93 | 13.63 | 13.33 |
| 0.310 | -0.11 | 0.93 | P49480     | Cathepsin H; Cathepsin H mini chain; Cathepsin H; Cathepsin H heavy             | Cthc     | 1540 | 10 | 10 | 10 | 38.4 | 38.4 | 37.17 | 10.389 | 0.0000 | 28.898 | 24989000   | 149  | 16.88 | 16.88 | 16.88 | 16.82 | 17.22 | 16.86 | 16.94 |
| 0.070 | -0.11 | 0.93 | Q9CQ09     | GTP-binding protein SAR1b                                                       | Sar1b    | 456  | 9  | 9  | 9  | 5.9  | 5.9  | 5.9   | 22.382 | 0.0000 | 78.309 | 45409000   | 177  | 15.48 | 13.03 | 17.58 | 17.18 | 18.07 | 17.18 | 16.59 |
| 0.659 | -0.11 | 0.93 | Q8QTY0     | Formin-binding protein 1                                                        | Fbnp1    | 2815 | 28 | 28 | 27 | 47.1 | 47.1 | 47.1  | 71.343 | 0.0000 | 173.3  | 49969000   | 407  | 16.38 | 16.34 | 16.31 | 16.61 | 16.35 | 16.35 | 16.49 |
| 0.327 | -0.11 | 0.93 | Q9EQH2     | Endoplasmic reticulum aminopeptidase 1                                          | Erap1    | 5277 | 27 | 27 | 27 | 31.4 | 31.4 | 31.4  | 106.6  | 0.0000 | 323.61 | 89830000   | 690  | 17.41 | 17.21 | 17.23 | 17.64 | 17.50 | 17.25 | 17.17 |
| 0.281 | -0.11 | 0.93 | Q8R5A6     | TBC1 domain family member 22A                                                   | Tbc1d22a | 3883 | 15 | 15 | 15 | 37.6 | 37.6 | 37.6  | 59.362 | 0.0000 | 98.294 | 20132000   | 168  | 15.83 | 15.74 | 15.93 | 16.24 | 15.59 | 16.02 | 15.92 |
| 0.173 | -0.11 | 0.93 | P18760     | ChR1                                                                            | ChR1     | 843  | 18 | 18 | 18 | 94.6 | 94.6 | 94.6  | 18.559 | 0.0000 | 323.31 | 1570920000 | 1815 | 18.91 | 21.34 | 21.48 | 22.13 | 21.48 | 21.81 | 14.63 |
| 0.091 | -0.11 | 0.93 | Q8QYV3     | Transcription/transcription domain-associated protein                           | Trap     | 2908 | 5  | 5  | 5  | 5    | 3    | 3     | 291.55 | 0.0000 | 14.262 | 3907000    | 55   | 14.17 | 13.78 | 13.90 | 14.09 | 13.16 | 14.90 | 14.08 |
| 0.116 | -0.11 | 0.93 | Q3UVK0     | Endoplasmic reticulum metalloproteinase 1                                       | Emp1     | 2038 | 11 | 11 | 11 | 14.6 | 14.6 | 14.6  | 100.15 | 0.0000 | 41.968 | 16528000   | 136  | 15.68 | 15.03 | 15.29 | 16.07 | 15.36 | 15.53 | 14.81 |
| 0.625 | -0.11 | 0.93 | P47802     | Metastin-1                                                                      | Mt1      | 1124 | 11 | 11 | 11 | 39.7 | 39.7 | 39.7  | 35.623 | 0.0000 | 40.676 | 26014000   | 241  | 16.69 | 16.36 | 16.50 | 16.61 | 16.62 | 16.65 | 16.63 |
| 0.210 | -0.11 | 0.93 | Q9QXV5     | LM domain-containing helix-DNA-binding protein 8                                | Chd8     | 1773 | 5  | 5  | 5  | 5.6  | 5.6  | 5.6   | 290.84 | 0.0000 | 21.798 | 3882000    | 65   | 14.16 | 13.78 | 14.31 | 14.10 | 13.87 | 14.71 | 14.55 |
| 0.192 | -0.11 | 0.93 | P49138     | MAP kinase-activated protein kinase 2                                           | Mapkapk2 | 1156 | 26 | 26 | 25 | 61.4 | 61.4 | 58.3  | 44.040 | 0.0000 | 155.09 | 73545000   | 420  | 16.82 | 16.84 | 16.84 | 17.19 | 16.39 | 17.14 | 17.05 |
| 0.486 | -0.11 | 0.93 | Q9CZV8     | F-box/RR-repeat protein 20                                                      | Fbx20    | 4841 | 6  | 6  | 6  | 13.8 | 13.8 | 13.8  | 48.396 | 0.0000 | 9.2105 | 2458600    | 22   | 13.93 | 13.59 | 13.73 | 13.86 | 13.98 | 13.74 | 13.87 |
| 0.722 | -0.11 | 0.93 | P00504     | Fructose-bisphosphate aldolase A                                                | Aldoa    | 3447 | 52 | 52 | 52 | 12   | 98.9 | 98.9  | 30.35  | 0.0000 | 323.31 | 603270000  | 5509 | 22.47 | 22.63 | 22.46 | 22.71 | 22.65 | 22.60 | 22.43 |
| 0.099 | -0.11 | 0.93 | Q9CFE2     | RAF609 protein Cdc42T22 homolog                                                 | Cdc42    | 348  | 10 | 10 | 10 | 35   | 35   | 35    | 39.291 | 0.0000 | 65.666 | 11221000   | 174  | 14.65 | 14.65 | 14.65 | 14.65 | 14.65 | 14.65 | 14.65 |
| 0.139 | -0.11 | 0.93 | Q9CQ50     | Ras-related protein Rab-43                                                      | Rab43    | 3498 | 7  | 6  | 6  | 6    | 36.8 | 36.8  | 23.263 | 0.0000 | 31.854 | 6989300    | 69   | 14.71 | 14.60 | 14.93 | 15.13 | 14.10 | 15.16 | 15.03 |
| 0.165 | -0.11 | 0.93 | Q5U509     | BRCA1-A complex subunit RAP80                                                   | Uimc1    | 2168 | 5  | 5  | 5  | 8.1  | 8.1  | 8.1   | 81.477 | 0.0000 | 12.979 | 1269700    | 13   | 11.84 | 12.48 | 11.89 | 12.18 | 11.73 | 12.41 | 12.41 |
| 0.099 | -0.11 | 0.93 | Q9CQ02     | Methyltransferase-like protein 16                                               | Mett16   | 4598 | 6  | 6  | 6  | 10.3 | 10.3 | 10.3  | 62.34  | 0.0004 | 4.8804 | 2422800    | 22   | 14.17 | 12.69 | 13.44 | 13.81 | 13.83 | 13.38 | 13.16 |
| 0.118 | -0.11 | 0.93 | P23198     | Chromobox protein homolog 3                                                     | Cbx3     | 880  | 5  | 4  | 4  | 36.6 | 36.6 | 27.9  | 20.855 | 0.0000 | 19.461 | 14222000   | 118  | 15.27 | 15.81 | 15.59 | 16.20 | 15.22 | 15.18 | 16.07 |
| 0.092 | -0.11 | 0.93 | Q9C8B5     | Charged multivesicular body protein 4b                                          | Chmp4b   | 505  | 14 | 14 | 14 | 52.7 | 52.7 | 52.7  | 24.936 | 0.0000 | 296.94 | 37811000   | 165  | 16.61 | 16.58 | 16.58 | 16.61 | 16.58 | 16.58 | 16.53 |
| 0.438 | -0.11 | 0.93 | Q9QNM1     | Lysine- $\gamma$ -RNA ligase                                                    | Kars     | 4468 | 37 | 37 | 37 | 47.6 | 47.6 | 47.6  | 67.839 | 0.0000 | 299.57 | 96053000   | 754  | 17.99 | 17.79 | 18.00 | 18.01 | 18.28 | 17.94 | 17.92 |
| 0.660 | -0.11 | 0.93 | Q08547     | Vesicle-trafficking protein SEC22b                                              | Sec22b   | 270  | 20 | 20 | 20 | 79.1 | 79.1 | 79.1  | 24.74  | 0.0000 | 294.03 | 121490000  | 407  | 18.13 | 18.02 | 18.01 | 18.29 | 18.01 | 18.23 | 18.14 |
| 0.053 | -0.11 | 0.93 | Q8K859     | Pumilio domain-containing protein KIAA0020                                      | Kiaa0020 | 3104 | 5  | 5  | 5  | 8.5  | 8.5  | 8.5   | 72.799 | 0.0000 | 14.108 | 4537700    | 36   | 13.00 | 14.57 | 14.62 | 12.84 | 14.06 | 14.66 | 15.15 |
| 0.733 | -0.11 | 0.93 | Q9JLV6     | Bifunctional polynucleotide phosphatase/kinase/Polynucleotide 3-phosphatase     | Pfnp     | 5405 | 28 | 28 | 28 | 63.6 | 63.6 | 63.6  | 57.223 | 0.0000 | 289.18 | 65987000   | 464  | 16.51 | 16.58 | 16.47 | 16.56 | 16.79 | 16.54 | 16.63 |
| 1.839 | -0.11 | 0.93 | Q3URD3     | Sarcolemmal membrane-associated protein                                         | Simap    | 2021 | 12 | 12 | 12 | 16.9 | 16.9 | 16.9  | 96.932 | 0.0000 | 39.099 | 3897000    | 72   | 13.58 | 13.61 | 13.56 | 13.63 | 13.70 | 13.71 | 13.74 |
| 0.198 | -0.11 | 0.92 | Q8VHK9     | ATP-dependent RNA helicase DHX36                                                | Dhx36    | 4021 | 11 | 11 | 11 | 20.5 | 20.5 | 20.5  | 113.88 | 0.0000 | 38.594 | 6679800    | 103  | 15.44 | 14.37 | 14.80 | 15.01 | 14.26 | 14.57 | 14.88 |
| 0.056 | -0.11 | 0.92 | Q9ZD74     | Intersectin-1                                                                   | Itsn1    | 5781 | 12 | 12 | 12 | 11.8 | 11.8 | 11.8  | 194.29 | 0.0000 | 3      |            |      |       |       |       |       |       |       |       |

|       |       |      |        |                                                                          |          |      |     |     |     |      |      |        |        |        |           |           |       |       |       |       |       |       |       |       |
|-------|-------|------|--------|--------------------------------------------------------------------------|----------|------|-----|-----|-----|------|------|--------|--------|--------|-----------|-----------|-------|-------|-------|-------|-------|-------|-------|-------|
| 0.411 | -0.13 | 0.91 | P09925 | Surflet locus protein 1                                                  | Surf1    | 702  | 6   | 5   | 6   | 29.7 | 29.7 | 29.7   | 34.798 | 0.0000 | 34.801    | 9396200   | 72    | 15.18 | 15.14 | 15.20 | 15.61 | 15.09 | 15.15 | 15.37 |
| 0.265 | -0.13 | 0.91 | Q7T095 | Protein lunapark                                                         | Lnp      | 2773 | 7   | 7   | 7   | 20.2 | 20.2 | 20.2   | 47.499 | 0.0000 | 25.415    | 13429000  | 131   | 14.97 | 14.84 | 15.03 | 14.79 | 15.32 | 14.86 | 15.15 |
| 0.299 | -0.13 | 0.91 | Q00519 | Xanthine dehydrogenase/oxidase:Xanthine dehydrogenase:Xanthine oxid      | Xdh      | 1697 | 57  | 57  | 55  | 47.3 | 47.3 | 46.6   | 146.56 | 0.0000 | 323.31    | 28943000  | 1532  | 18.24 | 17.95 | 18.29 | 18.59 | 18.33 | 18.31 | 17.94 |
| 0.362 | -0.13 | 0.91 | P42230 | Signal transducer and activator of transcription 5A                      | Stat5a   | 1077 | 17  | 17  | 6   | 23   | 23   | 8.1    | 90.83  | 0.0000 | 90.869    | 24632000  | 251   | 15.83 | 15.65 | 15.75 | 16.22 | 15.65 | 15.91 | 15.71 |
| 0.156 | -0.13 | 0.91 | Q4V453 | Pleiotropic chromatin cohesin protein PDS5 homolog B                     | Pds5b    | 206  | 23  | 23  | 26  | 23   | 23   | 164.42 | 123.48 | 0.0000 | 123.48    | 37546000  | 248   | 15.61 | 15.01 | 15.62 | 16.01 | 15.62 | 15.77 | 15.93 |
| 0.081 | -0.13 | 0.91 | Q46222 | Calcium/calmodulin-dependent protein kinase type II subunit delta        | Camk2d   | 2642 | 22  | 22  | 17  | 48.5 | 48.5 | 40.3   | 56.369 | 0.0000 | 296.59    | 10430000  | 529   | 17.77 | 17.71 | 17.81 | 18.02 | 18.01 | 17.81 | 17.87 |
| 0.820 | -0.13 | 0.91 | Q8CG48 | Structural maintenance of chromosomes protein 2                          | Smc2     | 3497 | 64  | 64  | 64  | 55.2 | 55.2 | 55.2   | 134.24 | 0.0000 | 294.97    | 76308000  | 671   | 16.17 | 16.21 | 16.22 | 16.28 | 16.51 | 16.33 | 16.21 |
| 0.421 | -0.13 | 0.91 | Q99JW4 | LIM and senescent cell antigen-like-containing domain protein 1          | Lims1    | 4352 | 17  | 17  | 17  | 51.1 | 51.1 | 51.1   | 37.24  | 0.0000 | 77.39     | 58165000  | 584   | 16.43 | 16.07 | 16.34 | 16.38 | 16.51 | 16.58 | 16.18 |
| 0.435 | -0.13 | 0.91 | Q99M99 | Propionyl-CoA carboxylase beta chain, mitochondrial                      | Pccb     | 4469 | 25  | 25  | 25  | 71.9 | 71.9 | 58.408 | 45.08  | 0.0000 | 306.83    | 91355000  | 479   | 17.96 | 17.83 | 18.08 | 17.98 | 18.42 | 17.96 | 18.16 |
| 0.098 | -0.13 | 0.91 | Q4A863 | Transcription factor RbB                                                 | Rbb      | 1736 | 4   | 4   | 4   | 12.2 | 12.2 | 60.305 | 36.475 | 0.0000 | 36.475    | 9073500   | 63    | 15.05 | 14.84 | 15.02 | 15.70 | 14.48 | 16.07 | 15.92 |
| 1.079 | -0.13 | 0.91 | Q921G8 | Gamma-tubulin complex component 2                                        | Tubgp2   | 4224 | 13  | 13  | 13  | 20   | 20   | 20     | 103.22 | 0.0000 | 36.167    | 8169400   | 133   | 14.15 | 14.10 | 14.23 | 14.41 | 14.20 | 14.26 | 14.30 |
| 0.085 | -0.13 | 0.91 | Q3UNZ8 | Quinone oxidoreductase-like protein 2                                    | Qox2     | 2011 | 6   | 6   | 6   | 36.6 | 36.6 | 36.6   | 37.808 | 0.0000 | 48.516    | 3135800   | 48    | 13.64 | 12.99 | 13.77 | 14.90 | 13.15 | 12.91 | 13.45 |
| 0.502 | -0.13 | 0.91 | Q8UX85 | 28S ribosomal protein S7, mitochondrial                                  | Mps7     | 2875 | 11  | 11  | 10  | 50   | 50   | 47.1   | 28.062 | 0.0000 | 48.484    | 15422000  | 150   | 16.16 | 16.09 | 16.18 | 16.37 | 16.33 | 16.43 | 15.99 |
| 0.273 | -0.13 | 0.91 | P11835 | Integrin beta-2                                                          | Igb2     | 37   | 3   | 3   | 3   | 45.1 | 45.1 | 85.025 | 0.0000 | 323.31 | 691186000 | 1282      | 20.65 | 20.25 | 20.52 | 20.93 | 20.36 | 20.77 | 20.35 |       |
| 0.331 | -0.13 | 0.91 | Q9CX00 | IST1 homolog                                                             | Ist1     | 4742 | 16  | 16  | 16  | 46.4 | 46.4 | 46.4   | 39.468 | 0.0000 | 278.44    | 28260000  | 286   | 16.17 | 15.85 | 15.81 | 16.19 | 16.28 | 16.10 | 15.74 |
| 0.895 | -0.13 | 0.91 | Q8BTM8 | Filamin-A                                                                | Flna     | 3204 | 184 | 184 | 175 | 70   | 70   | 68.4   | 281.22 | 0.0000 | 323.31    | 280460000 | 6735  | 19.91 | 19.95 | 20.08 | 20.22 | 19.99 | 20.17 | 20.08 |
| 0.928 | -0.13 | 0.91 | Q81U08 | Zinc finger FYVE domain-containing protein 1                             | Zfyve1   | 2928 | 11  | 11  | 11  | 21.5 | 21.5 | 21.5   | 86.939 | 0.0000 | 68.267    | 7636600   | 108   | 14.63 | 14.61 | 14.53 | 14.83 | 14.77 | 14.56 | 14.74 |
| 0.376 | -0.14 | 0.91 | Q8DB73 | NADH-cytochrome b5 reductase 1                                           | Cyb5r1   | 5130 | 14  | 14  | 14  | 46.9 | 46.9 | 46.9   | 34.134 | 0.0000 | 104.03    | 33915000  | 256   | 16.43 | 16.15 | 16.25 | 16.14 | 16.71 | 16.43 | 16.37 |
| 0.836 | -0.14 | 0.91 | Q8CIE6 | Cotasterone subunit alpha;Xenin;Proxenin                                 | Copa     | 3550 | 73  | 73  | 73  | 61.8 | 61.8 | 61.8   | 138.43 | 0.0000 | 323.31    | 412070000 | 1819  | 19.02 | 18.76 | 18.90 | 19.01 | 19.14 | 19.01 | 18.95 |
| 0.117 | -0.14 | 0.91 | Q9QZ05 | Eukaryotic translation initiation factor 2-alpha kinase 4                | Elf2ak4  | 5582 | 3   | 3   | 3   | 2.3  | 2.3  | 2.3    | 198.48 | 0.0000 | 8.3241    | 1672300   | 17    | 13.04 | 12.62 | 13.02 | 13.10 | 13.85 | 13.03 | 12.14 |
| 0.984 | -0.14 | 0.91 | P70677 | Caspase-3;Caspase-3 subunit p17;Caspase-3 subunit p12                    | Casp3    | 1583 | 9   | 9   | 9   | 40.1 | 40.1 | 40.1   | 31.474 | 0.0000 | 31.356    | 17693000  | 101   | 16.33 | 16.30 | 16.19 | 16.46 | 16.49 | 16.26 | 16.41 |
| 0.395 | -0.14 | 0.91 | F6ZDS4 | Nucleoporin TPR                                                          | Nup1     | 257  | 50  | 50  | 50  | 27.8 | 27.8 | 27.8   | 273.90 | 0.0000 | 110.82    | 40299000  | 567   | 15.58 | 15.39 | 15.63 | 15.84 | 15.33 | 15.79 | 15.73 |
| 0.233 | -0.14 | 0.91 | Q8VC81 | Nucleoporin NDC1                                                         | Ndc1     | 3913 | 8   | 8   | 8   | 21.2 | 21.2 | 21.2   | 75.409 | 0.0000 | 66.266    | 20963000  | 120   | 16.66 | 16.40 | 16.53 | 16.96 | 16.83 | 16.78 | 16.11 |
| 0.181 | -0.14 | 0.91 | P50429 | Arylsulfatase                                                            | Arsb     | 1182 | 9   | 9   | 9   | 17   | 17   | 17     | 59.646 | 0.0000 | 18.37     | 18233000  | 117   | 16.19 | 16.20 | 16.62 | 15.83 | 16.49 | 16.79 | 16.78 |
| 0.751 | -0.14 | 0.91 | P97369 | Neutrophil cytosolic factor 4                                            | Ncf4     | 1634 | 29  | 29  | 29  | 76.1 | 76.1 | 38.707 | 76.1   | 0.0000 | 323.31    | 265454000 | 985   | 18.40 | 18.33 | 18.40 | 18.46 | 18.65 | 18.40 | 18.37 |
| 0.286 | -0.14 | 0.91 | Q8CSH3 | Exosome complex exonuclease RRP44                                        | Rrp44    | 4698 | 22  | 22  | 22  | 35.3 | 35.3 | 108.84 | 0.0000 | 112.13 | 21988000  | 316       | 15.54 | 15.08 | 15.48 | 15.39 | 15.48 | 15.95 | 15.34 |       |
| 0.230 | -0.14 | 0.91 | Q8ZU11 | Tight junction protein ZO-2                                              | Tjp2     | 5787 | 8   | 8   | 8   | 11   | 11   | 11     | 131.28 | 0.0000 | 25.459    | 8379000   | 53    | 15.60 | 16.12 | 16.37 | 15.91 | 16.00 | 16.39 | 16.35 |
| 1.274 | -0.14 | 0.91 | Q9WUR2 | Enoyl-CoA delta isomerase 2, mitochondrial                               | Eci2     | 5721 | 13  | 13  | 13  | 38.4 | 38.4 | 38.4   | 43.267 | 0.0000 | 58.743    | 14999000  | 144   | 16.02 | 15.99 | 15.85 | 16.02 | 16.15 | 16.07 | 16.13 |
| 1.116 | -0.14 | 0.91 | Q8CJ35 | Dedicator of cytokinesis protein 2                                       | Dock2    | 3376 | 91  | 91  | 90  | 55.6 | 55.6 | 55.1   | 211.7  | 0.0000 | 323.31    | 305970000 | 2056  | 17.36 | 17.17 | 17.38 | 17.41 | 17.59 | 17.49 | 17.47 |
| 0.402 | -0.14 | 0.91 | Q9UKV1 | Sic3 transporter 1                                                       | Sic3     | 5430 | 13  | 13  | 13  | 10.8 | 10.8 | 41.789 | 0.0000 | 12.115 | 10562000  | 97        | 15.94 | 15.93 | 15.95 | 15.94 | 15.93 | 15.95 | 15.93 |       |
| 1.028 | -0.14 | 0.91 | Q8KUP8 | Chromatin accessibility complex protein 1                                | Chrac1   | 5457 | 4   | 4   | 4   | 4    | 4    | 47.3   | 14.127 | 0.0000 | 18.12     | 4152300   | 59    | 14.10 | 14.06 | 15.48 | 15.48 | 14.14 | 14.56 | 15.46 |
| 0.847 | -0.14 | 0.91 | Q8OUJ7 | Rab3 GTPase-activating protein catalytic subunit                         | Rab3gap1 | 2829 | 28  | 28  | 28  | 35.7 | 35.7 | 110.2  | 0.0000 | 190.73 | 51588000  | 436       | 16.95 | 16.84 | 17.05 | 17.17 | 17.18 | 16.99 | 17.00 |       |
| 0.604 | -0.14 | 0.91 | Q3SU45 | Transmembrane protein 140, mitochondrial                                 | Tm140    | 2143 | 62  | 62  | 61  | 62.1 | 62.1 | 60.8   | 117.23 | 0.0000 | 323.31    | 34969000  | 1615  | 18.97 | 18.66 | 18.77 | 19.04 | 18.89 | 19.04 | 18.78 |
| 0.408 | -0.14 | 0.91 | Q8CZ38 | Neurofilament NEHD1-associated protein 1                                 | Nef1     | 553  | 9   | 9   | 9   | 47.1 | 47.1 | 136.33 | 0.0000 | 323.31 | 160400000 | 1194      | 17.57 | 17.51 | 17.57 | 17.57 | 17.62 | 17.53 | 17.48 |       |
| 0.268 | -0.14 | 0.91 | Q9QOU0 | Transforming protein RhoA                                                | Rhoa     | 5514 | 18  | 18  | 10  | 67.9 | 67.9 | 39.9   | 21.782 | 0.0000 | 239.34    | 492120000 | 1176  | 18.95 | 18.94 | 19.40 | 19.01 | 19.59 | 18.99 | 19.36 |
| 0.301 | -0.14 | 0.91 | Q9CQA9 | Cancer-related nucleoside-triphosphatase homolog                         | Ntpcr    | 4580 | 11  | 11  | 11  | 79.5 | 79.5 | 79.5   | 20.667 | 0.0000 | 104.02    | 43632000  | 264   | 16.78 | 17.02 | 17.40 | 17.41 | 16.93 | 17.21 | 17.27 |
| 0.265 | -0.14 | 0.91 | Q6Q902 | Epidermal growth factor receptor substrate 15-like 1                     | Eps15r1  | 2220 | 16  | 16  | 16  | 27.7 | 27.7 | 27.7   | 99.307 | 0.0000 | 82.486    | 14381000  | 169   | 15.39 | 15.45 | 15.43 | 15.80 | 15.82 | 15.04 | 15.99 |
| 0.056 | -0.14 | 0.91 | Q9CZ26 | Thrombospondin protein L40, mitochondrial                                | Tsp40    | 5803 | 40  | 40  | 40  | 58.0 | 58.0 | 40.3   | 24.301 | 0.0000 | 40.3      | 4021900   | 61    | 15.02 | 15.02 | 15.02 | 15.02 | 15.02 | 15.02 | 15.02 |
| 0.163 | -0.14 | 0.91 | Q61578 | NADPH:adenosine oxidoreductase, mitochondrial                            | Nadpr    | 2314 | 11  | 11  | 11  | 35   | 35   | 35     | 54.201 | 0.0000 | 66.771    | 14940000  | 129   | 15.67 | 15.62 | 15.48 | 16.19 | 16.10 | 14.98 | 15.98 |
| 0.258 | -0.14 | 0.91 | Q8BZA9 | Fructose-2,6-bisphosphatase TIGAR                                        | Tigar    | 3312 | 7   | 7   | 7   | 45.4 | 45.4 | 45.4   | 29.19  | 0.0000 | 124.85    | 21813000  | 117   | 16.34 | 16.35 | 16.31 | 17.01 | 16.43 | 16.18 | 16.27 |
| 1.018 | -0.14 | 0.91 | Q9Q6Z1 | Nucleolar protein 56                                                     | Nop56    | 5014 | 31  | 31  | 31  | 66.9 | 66.9 | 66.9   | 64.464 | 0.0000 | 323.31    | 9885600   | 852   | 16.25 | 16.30 | 16.26 | 16.39 | 16.27 | 16.50 | 16.51 |
| 0.380 | -0.14 | 0.91 | Q8R088 | Glycyl phosphoglycerate 3-kinase                                         | Golp3k   | 3752 | 8   | 7   | 7   | 33   | 28.4 | 28.4   | 32.905 | 0.0000 | 22.755    | 4417500   | 29    | 14.08 | 14.56 | 13.97 | 14.33 | 14.46 | 14.30 | 14.29 |
| 0.089 | -0.14 | 0.91 | Q8CSH3 | Protein arginine N-methyltransferase 5                                   | Rmt5     | 3553 | 13  | 13  | 13  | 25.7 | 25.7 | 72.679 | 0.0000 | 64.574 | 14976000  | 169       | 16.73 | 16.70 | 16.40 | 16.73 | 16.40 | 16.73 | 16.62 |       |
| 0.110 | -0.14 | 0.91 | Q9Q592 | Pyruvate carboxylase, mitochondrial                                      | Pc       | 1744 | 30  | 30  | 30  | 35.8 | 35.8 | 129.68 | 0.0000 | 105.32 | 37456000  | 357       | 15.95 | 15.44 | 15.80 | 16.69 | 15.54 | 16.34 | 16.35 |       |
| 0.926 | -0.14 | 0.91 | Q8BS50 | Regulator of microtubule dynamics protein 2                              | Rmdn2    | 3186 | 2   | 2   | 2   | 35.8 | 35.8 | 6.8    | 47.016 | 0.0002 | 5.9662    | 4265500   | 56    | 14.36 | 14.30 | 14.47 | 14.38 | 14.65 | 14.51 | 14.53 |
| 0.408 | -0.14 | 0.91 | Q8RXR6 | Serine/threonine-protein phosphatase 6 regulatory ankryin repeat subunit | Ankr44   | 55   | 32  | 32  | 31  | 35.8 | 35.8 | 34.7   | 107.38 | 0.0000 | 156.1     | 49594000  | 551   | 15.93 | 15.64 | 15.92 | 16.19 | 16.10 | 15.91 | 15.69 |
| 0.814 | -0.14 | 0.91 | Q8C627 | Bifunctional glutamate/proline- RNA ligase/Glutamate- RNA ligase/Protein | Eps      | 3507 | 111 | 111 | 111 | 74.7 | 74.7 | 170.06 | 0.0000 | 323.31 | 260151000 | 2651      | 17.61 | 17.47 | 17.76 | 17.67 | 17.63 | 17.83 | 17.62 |       |
| 0.418 | -0.14 | 0.91 | Q9PCP1 | Cytochrome c oxidase subunit 6C                                          | Cox6c    | 4525 | 10  | 10  | 10  | 64.5 | 64.5 | 64.5   | 8.4699 | 0.0000 | 89.107    | 250040000 | 468   | 15.55 | 19.37 | 19.54 | 19.66 | 19.28 | 19.80 | 19.77 |
| 0.155 | -0.14 | 0.91 | Q35495 | Cyclin-dependent kinase 14                                               | Cdk14    | 377  | 6   | 5   | 5   | 13.6 | 11.9 | 11.9   | 52.995 | 0.0000 | 82.641    | 2737900   | 30    | 13.33 | 14.00 | 13.98 | 13.24 | 14.15 | 14.41 | 13.86 |
| 0.622 | -0.14 | 0.91 | Q7TT50 | Serine/threonine-protein kinase MRCK beta                                | Cdk42bpb | 2793 | 39  | 38  | 27  | 57.4 | 27.4 | 27.4   | 194.75 | 0.0000 | 133.72    | 28611000  | 345   | 15.19 | 15.16 | 15.33 | 15.54 | 15.24 | 15.49 | 15.22 |
| 0.285 | -0.15 | 0.90 | Q30368 | Protein subunit 6                                                        | Pf6n     | 1728 | 6   | 6   | 6   | 50.4 | 50.4 | 50.4   | 14.454 | 0.0000 | 15.749    | 4731600   | 56    | 13.49 | 14.00 | 14.27 | 13.95 | 14.25 | 14.10 | 13.96 |

|       |       |             |                                                                                |          |       |    |    |    |      |      |      |         |        |        |          |      |       |       |       |       |       |       |       |
|-------|-------|-------------|--------------------------------------------------------------------------------|----------|-------|----|----|----|------|------|------|---------|--------|--------|----------|------|-------|-------|-------|-------|-------|-------|-------|
| 0.381 | -0.16 | 0.89 P70182 | Phosphatidylinositol 4-phosphate 5-kinase type-1 alpha                         | Pip5k1a  | 1530  | 6  | 5  | 5  | 17.2 | 14.7 | 14.7 | 60.484  | 0.0000 | 18.905 | 5004500  | 68   | 14.04 | 13.63 | 13.56 | 14.18 | 13.90 | 13.91 | 13.62 |
| 0.610 | -0.16 | 0.89 O70378 | ER membrane protein complex subunit 8                                          | Emc8     | 492   | 8  | 8  | 8  | 52.2 | 52.2 | 52.2 | 23.348  | 0.0000 | 106.12 | 3304000  | 284  | 16.50 | 16.75 | 16.66 | 16.74 | 16.95 | 16.57 | 16.95 |
| 0.919 | -0.16 | 0.89 Q9K6C8 | von Willebrand factor A domain-containing protein 5A                           | Vwa5a    | 4370  | 49 | 49 | 49 | 55.6 | 55.6 | 55.6 | 87.142  | 0.0000 | 323.31 | 49977000 | 1873 | 19.50 | 19.23 | 19.42 | 19.48 | 19.68 | 19.55 | 19.48 |
| 0.179 | -0.16 | 0.89 Q9CYH2 | Redox-regulatory protein FAM213a                                               | Fam213a  | 4797  | 5  | 5  | 5  | 17.4 | 17.4 | 17.4 | 24.394  | 0.0000 | 19.949 | 5429300  | 68   | 14.33 | 14.40 | 14.35 | 14.44 | 14.40 | 13.71 | 15.02 |
| 0.622 | -0.16 | 0.89 Q8B520 | Vacuole-rich repeat protein SHOC-2                                             | Shoc2    | 5338  | 7  | 7  | 7  | 18.9 | 18.9 | 18.9 | 64.8922 | 0.0000 | 18.9   | 5985500  | 124  | 15.81 | 14.74 | 14.75 | 14.86 | 15.19 | 14.76 | 14.98 |
| 0.048 | -0.16 | 0.89 Q9CJQ6 | Density-regulated protein                                                      | Dnmr     | 4696  | 5  | 5  | 5  | 42.4 | 42.4 | 42.4 | 22.166  | 0.0000 | 51.043 | 7997300  | 62   | 13.69 | 16.34 | 12.45 | 13.94 | 14.27 | 13.15 | 15.94 |
| 0.378 | -0.17 | 0.89 Q9CQI3 | Glia maturation factor beta                                                    | Gmfb     | 4601  | 12 | 12 | 9  | 64.1 | 64.1 | 64.1 | 16.723  | 0.0000 | 84.669 | 2666600  | 206  | 15.82 | 16.39 | 16.21 | 16.48 | 16.11 | 16.13 | 16.50 |
| 0.464 | -0.17 | 0.89 P08003 | Protein disulfide-isomerase A4                                                 | Pdia4    | 674   | 52 | 52 | 52 | 59.4 | 59.4 | 59.4 | 71.962  | 0.0000 | 323.31 | 31236000 | 1390 | 18.08 | 18.22 | 18.42 | 18.55 | 18.06 | 18.48 | 18.52 |
| 0.429 | -0.17 | 0.89 Q9CZY3 | Ubiquitin-conjugating enzyme E2 variant 1                                      | Ube2v1   | 4848  | 12 | 12 | 6  | 82.3 | 82.3 | 82.3 | 49.1635 | 0.0000 | 201.03 | 13153000 | 351  | 18.78 | 16.54 | 19.03 | 18.78 | 19.20 | 19.05 | 18.77 |
| 1.213 | -0.17 | 0.89 Q8A028 | Switch-associated protein 70                                                   | Swap70   | 2895  | 41 | 41 | 41 | 62.9 | 62.9 | 62.9 | 68.995  | 0.0000 | 323.31 | 11545000 | 801  | 17.20 | 17.06 | 17.20 | 17.32 | 17.19 | 17.20 | 17.18 |
| 0.075 | -0.17 | 0.89 Q91X51 | Golgi reassembly-stacking protein 1                                            | Gorasp1  | 4134  | 2  | 2  | 2  | 8.1  | 8.1  | 8.1  | 46.882  | 0.0000 | 9.381  | 2324600  | 27   | 14.34 | 12.09 | 14.96 | 14.11 | 14.59 | 13.36 | 13.85 |
| 0.351 | -0.17 | 0.89 Q6ZQI3 | Maleicn                                                                        | Mlec     | 2697  | 17 | 17 | 17 | 51.2 | 51.2 | 51.2 | 32.342  | 0.0000 | 126.01 | 50723000 | 261  | 17.66 | 17.56 | 17.47 | 17.55 | 18.23 | 17.60 | 17.55 |
| 0.683 | -0.17 | 0.89 Q09172 | Glutamate-cysteine ligase regulatory subunit                                   | Gclm     | 3300  | 14 | 14 | 14 | 45.3 | 45.3 | 45.3 | 30.534  | 0.0000 | 323.31 | 15718000 | 533  | 18.59 | 18.59 | 18.81 | 18.62 | 19.01 | 18.62 | 18.77 |
| 0.617 | -0.17 | 0.89 Q8CJ22 | Vacuolar protein sorting-associated protein 26B                                | Vps26b   | 3334  | 12 | 11 | 38 | 38.7 | 38.7 | 38.7 | 39.124  | 0.0000 | 35.615 | 20563000 | 124  | 15.81 | 15.73 | 15.85 | 15.85 | 16.27 | 15.92 | 15.80 |
| 0.321 | -0.17 | 0.89 P61514 | 60S ribosomal protein L37a                                                     | Rpl37a   | 1386  | 8  | 8  | 8  | 73.9 | 73.9 | 73.9 | 10.275  | 0.0000 | 133.91 | 74001000 | 258  | 17.74 | 17.84 | 18.05 | 17.80 | 17.71 | 18.24 | 18.44 |
| 1.158 | -0.17 | 0.89 Q91V26 | Stromal membrane-associated protein 1                                          | Smap1    | 4086  | 9  | 8  | 8  | 18.4 | 16.6 | 16.6 | 47.66   | 0.0000 | 48.188 | 11150000 | 181  | 14.73 | 14.53 | 14.77 | 14.88 | 14.74 | 14.91 | 14.76 |
| 0.601 | -0.17 | 0.89 Q8QZV0 | Ribonuclease H2 subunit B                                                      | Rnaseh2b | 2922  | 11 | 11 | 11 | 38   | 38   | 38   | 34.729  | 0.0000 | 53.459 | 11144000 | 174  | 15.14 | 15.49 | 15.35 | 15.33 | 15.63 | 15.38 | 15.64 |
| 0.364 | -0.17 | 0.89 P57080 | Ubiquitin carboxyl-terminal hydrolase 25                                       | Ubp25    | 1295  | 13 | 13 | 13 | 14.3 | 14.3 | 14.3 | 121.42  | 0.0000 | 64.067 | 12193000 | 188  | 14.98 | 14.96 | 15.03 | 15.50 | 15.40 | 14.98 | 14.97 |
| 0.350 | -0.17 | 0.89 Q64737 | Trifunctional purine biosynthetic protein adenosine-3-Phosphoribosylamine Gart | Gart     | 2464  | 48 | 48 | 48 | 58.3 | 58.3 | 58.3 | 10.75   | 0.0000 | 323.31 | 18363000 | 1349 | 18.16 | 18.07 | 18.44 | 18.08 | 18.43 | 18.26 | 18.80 |
| 0.717 | -0.17 | 0.89 Q5XJY5 | Cotaster subunit delta                                                         | Arcn1    | 2173  | 44 | 44 | 44 | 71.2 | 71.2 | 71.2 | 57.229  | 0.0000 | 323.31 | 22005000 | 1199 | 17.55 | 17.62 | 17.74 | 17.65 | 18.05 | 17.72 | 17.81 |
| 0.970 | -0.17 | 0.89 Q8K310 | Matrin-3                                                                       | Matr3    | 3685  | 44 | 44 | 44 | 54.6 | 54.6 | 54.6 | 94.629  | 0.0000 | 323.31 | 21068000 | 1065 | 18.38 | 18.35 | 18.53 | 18.46 | 18.73 | 18.65 | 18.52 |
| 0.110 | -0.17 | 0.89 Q9JMD0 | BUR3-interacting and GLEBS motif-containing protein ZNF207                     | Znf207   | 5506  | 5  | 5  | 5  | 7.7  | 7.7  | 7.7  | 52.782  | 0.0000 | 11.623 | 14948000 | 98   | 15.31 | 15.70 | 15.62 | 16.37 | 14.31 | 16.15 | 16.03 |
| 1.066 | -0.17 | 0.89 Q08808 | Protein diaphanous homolog 1                                                   | Diaph1   | 3003  | 63 | 63 | 63 | 51.7 | 51.7 | 51.7 | 139.34  | 0.0000 | 323.31 | 15567000 | 1165 | 17.04 | 16.98 | 17.11 | 17.05 | 17.31 | 17.19 | 17.31 |
| 0.794 | -0.17 | 0.89 Q9Z120 | General vesicular transport factor p15                                         | Uso1     | 5826  | 29 | 29 | 29 | 40.6 | 40.6 | 40.6 | 106.98  | 0.0000 | 243.83 | 15020000 | 781  | 17.60 | 17.26 | 17.62 | 17.66 | 17.62 | 17.74 | 17.64 |
| 0.537 | -0.17 | 0.89 Q9QZK7 | Docking protein 3                                                              | Dok3     | 5599  | 15 | 15 | 15 | 55.2 | 55.2 | 55.2 | 48.027  | 0.0000 | 73.4   | 37997000 | 300  | 16.06 | 15.90 | 16.07 | 16.29 | 16.42 | 16.13 | 15.88 |
| 0.579 | -0.17 | 0.89 Q9Z1T2 | Torin-1A-inhibiting protein 1                                                  | Tor1aip1 | 4133  | 40 | 40 | 40 | 41.3 | 41.3 | 41.3 | 60.781  | 0.0000 | 304.81 | 78981000 | 420  | 17.50 | 17.50 | 17.67 | 17.50 | 17.07 | 17.72 | 17.11 |
| 0.147 | -0.17 | 0.89 Q84428 | Diacylglycerol kinase epsilon                                                  | Dgke     | 5649  | 12 | 12 | 4  | 12.9 | 12.9 | 12.9 | 63.534  | 0.0000 | 38.211 | 1583700  | 27   | 14.06 | 13.78 | 13.17 | 13.78 | 13.17 | 13.92 | 13.02 |
| 0.508 | -0.17 | 0.89 Q91YR1 | Twirlin-1                                                                      | Twf1     | 4173  | 21 | 18 | 18 | 50.3 | 46.3 | 46.3 | 40.079  | 0.0000 | 323.31 | 12422000 | 527  | 17.21 | 17.43 | 17.57 | 17.32 | 17.83 | 17.52 | 17.63 |
| 0.598 | -0.17 | 0.89 Q9D2R0 | Acetoacetyl-CoA synthetase                                                     | Aacs     | 4949  | 18 | 18 | 18 | 28.7 | 28.7 | 28.7 | 75.199  | 0.0000 | 125.19 | 50704000 | 334  | 16.84 | 16.71 | 16.58 | 16.81 | 17.17 | 16.79 | 16.75 |
| 0.711 | -0.17 | 0.89 P20600 | Beta-hexosaminidase subunit beta                                               | Hexb     | 852   | 28 | 28 | 27 | 48.5 | 48.5 | 48.5 | 61.115  | 0.0000 | 190.04 | 24444000 | 694  | 19.09 | 18.79 | 18.80 | 19.00 | 19.27 | 19.00 | 18.99 |
| 1.312 | -0.17 | 0.89 P26041 | Thymidine synthase                                                             | Tms      | 917   | 81 | 81 | 81 | 92.9 | 92.9 | 92.9 | 77.669  | 0.0000 | 32.31  | 50520000 | 21   | 13.17 | 12.93 | 13.25 | 13.17 | 13.21 | 12.57 | 21.46 |
| 0.747 | -0.17 | 0.89 P07607 | Thymidylate synthase                                                           | Tyms     | 671   | 3  | 3  | 3  | 14.3 | 14.3 | 14.3 | 34.958  | 0.0000 | 52.314 | 11448000 | 39   | 15.25 | 15.58 | 15.63 | 15.78 | 15.81 | 15.66 | 15.59 |
| 0.191 | -0.17 | 0.89 Q9ET26 | E3 ubiquitin-protein ligase RNF114                                             | Rnf114   | 5355  | 6  | 6  | 6  | 28.4 | 28.4 | 28.4 | 25.745  | 0.0000 | 40.509 | 8372900  | 83   | 14.87 | 14.70 | 14.52 | 15.28 | 15.26 | 14.89 | 14.05 |
| 0.920 | -0.17 | 0.89 Q91WC0 | Histone-lysine N-methyltransferase setd3                                       | Setd3    | 4103  | 13 | 13 | 13 | 31.8 | 31.8 | 31.8 | 67.175  | 0.0000 | 111.72 | 17667000 | 214  | 15.66 | 15.77 | 15.68 | 15.87 | 15.67 | 15.93 | 16.02 |
| 0.553 | -0.17 | 0.89 Q9P066 | Ubr1-binding protein 15                                                        | Ubp15    | 2597  | 37 | 37 | 37 | 38.2 | 38.2 | 38.2 | 132.96  | 0.0000 | 42.357 | 8425000  | 788  | 16.92 | 16.73 | 16.96 | 16.92 | 16.56 | 16.96 | 16.97 |
| 0.531 | -0.17 | 0.89 Q8V136 | Paxillin                                                                       | Pxn      | 4027  | 18 | 18 | 18 | 50.1 | 50.1 | 50.1 | 64.476  | 0.0000 | 323.31 | 46747000 | 412  | 16.65 | 16.51 | 16.57 | 17.01 | 16.63 | 16.90 | 16.47 |
| 0.318 | -0.18 | 0.89 Q88543 | COP9 signalosome complex subunit 3                                             | Cops3    | 5423  | 16 | 16 | 16 | 51.1 | 51.1 | 51.1 | 47.832  | 0.0000 | 323.31 | 36557000 | 303  | 16.67 | 16.41 | 16.55 | 17.00 | 16.72 | 16.95 | 16.19 |
| 0.787 | -0.18 | 0.89 Q9WV80 | Sorting nexin-1                                                                | Snx1     | 5736  | 34 | 32 | 32 | 57.7 | 53.6 | 53.6 | 58.951  | 0.0000 | 323.31 | 10982000 | 823  | 18.11 | 18.21 | 18.42 | 18.25 | 18.42 | 18.55 | 18.48 |
| 0.516 | -0.18 | 0.89 P61979 | Human ribonuclease nuclear ribonucleoprotein K                                 | Hnrnpk   | 13876 | 37 | 35 | 35 | 67.2 | 67.2 | 67.2 | 59.676  | 0.0000 | 32.31  | 53424000 | 1400 | 20.30 | 19.47 | 19.68 | 20.30 | 19.47 | 19.68 | 19.12 |
| 0.373 | -0.18 | 0.88 P63037 | DnaJ homolog subfamily A member 1                                              | Dnaj1a   | 1832  | 24 | 24 | 24 | 65   | 65   | 65   | 44.868  | 0.0000 | 260.39 | 74628000 | 486  | 17.15 | 17.66 | 17.72 | 17.47 | 17.91 | 17.52 | 17.86 |
| 0.590 | -0.18 | 0.88 P59016 | Vacuolar protein sorting-associated protein 33B                                | Vps33b   | 1328  | 15 | 15 | 15 | 30   | 30   | 30   | 70.525  | 0.0000 | 87.843 | 20164000 | 184  | 16.01 | 15.95 | 15.89 | 16.09 | 16.45 | 16.06 | 15.91 |
| 0.403 | -0.18 | 0.88 P85004 | Isochorismatase domain-containing protein 2A, mitochondrial                    | Isc2a    | 1615  | 10 | 10 | 10 | 76.2 | 76.2 | 76.2 | 22.417  | 0.0000 | 189.76 | 55052000 | 224  | 17.58 | 17.20 | 17.06 | 17.78 | 17.49 | 17.32 | 17.24 |
| 0.778 | -0.18 | 0.88 Q8PAP5 | GTPase-activating protein and VPS9 domain-containing protein 1                 | Gapv1    | 2599  | 28 | 28 | 28 | 23.3 | 23.3 | 23.3 | 162.4   | 0.0000 | 91.637 | 53585000 | 326  | 17.50 | 17.28 | 17.43 | 17.62 | 17.68 | 17.71 | 17.32 |
| 0.102 | -0.18 | 0.88 Q8K1H1 | TufA domain-containing protein 7                                               | Tuf7     | 3627  | 7  | 7  | 7  | 11.3 | 11.3 | 11.3 | 122.534 | 0.0000 | 43.644 | 6371500  | 62   | 14.51 | 13.85 | 14.12 | 14.51 | 13.92 | 14.13 | 14.12 |
| 0.717 | -0.18 | 0.88 P35263 | Ras-related protein Rab-18                                                     | Rab18    | 185   | 29 | 29 | 29 | 85   | 85   | 85   | 23.035  | 0.0000 | 17.338 | 72689000 | 418  | 17.31 | 17.26 | 17.36 | 17.49 | 17.75 | 17.38 | 17.34 |
| 0.424 | -0.18 | 0.88 Q0DB85 | Ribosomal RNA-processing protein 8                                             | Rpl8     | 5132  | 5  | 5  | 5  | 19.5 | 19.5 | 19.5 | 51.066  | 0.0000 | 19.385 | 3176400  | 39   | 13.71 | 14.33 | 13.72 | 14.04 | 14.10 | 14.01 | 14.25 |
| 0.270 | -0.18 | 0.88 Q61543 | Golgi apparatus protein 1                                                      | Golgt1   | 2309  | 28 | 28 | 28 | 28.8 | 28.8 | 28.8 | 133.73  | 0.0000 | 65.819 | 38166000 | 350  | 16.22 | 15.96 | 15.83 | 16.82 | 15.93 | 15.93 | 16.05 |
| 0.424 | -0.18 | 0.88 P57746 | V-type proton ATPase subunit D                                                 | Atp6d1   | 129   | 17 | 17 | 17 | 68   | 68   | 68   | 28.369  | 0.0000 | 32.31  | 88498000 | 404  | 18.28 | 18.13 | 17.88 | 18.42 | 18.08 | 18.57 | 18.02 |
| 0.224 | -0.18 | 0.88 Q8QTH2 | Protein LAP2                                                                   | Erbp2p   | 2804  | 21 | 21 | 19 | 23.3 | 23.3 | 23.3 | 157.25  | 0.0000 | 94.214 | 33838000 | 276  | 16.49 | 16.20 | 16.53 | 16.31 | 17.33 | 16.17 | 16.53 |
| 1.232 | -0.18 | 0.88 P08775 | DNA-directed RNA polymerase II subunit RPB1                                    | Rpb1     | 689   | 46 | 46 | 46 | 35.7 | 35.7 | 35.7 | 217.17  | 0.0000 | 323.31 | 49219000 | 523  | 15.81 | 15.62 | 15.86 | 15.99 | 15.85 | 16.01 | 15.91 |
| 0.786 | -0.18 | 0.88 Q8QXP8 | Protein FAM176B                                                                | Fam176b  | 2888  | 5  | 5  | 5  | 14.5 | 14.5 | 14.5 | 38.555  | 0.0000 | 8.8249 | 3569000  | 59   | 13.75 | 13.85 | 13.65 | 13.77 | 13.81 | 14.13 | 14.01 |
| 2.424 | -0.18 | 0.88 P17225 | Polypyrimidine tract-binding protein 1                                         | Ptbp1    | 8162  | 26 | 21 | 21 | 62.2 | 62.2 | 62.2 | 56.477  | 0.0000 |        |          |      |       |       |       |       |       |       |       |

|       |       |              |                                                                                  |             |      |    |    |    |      |        |        |        |        |           |           |       |       |       |       |       |       |       |       |
|-------|-------|--------------|----------------------------------------------------------------------------------|-------------|------|----|----|----|------|--------|--------|--------|--------|-----------|-----------|-------|-------|-------|-------|-------|-------|-------|-------|
| 0.951 | -0.20 | 0.87 P67778  | Prohibitin                                                                       | Phb         | 1508 | 32 | 32 | 32 | 94.5 | 94.5   | 94.5   | 29.82  | 0.0000 | 323.31    | 419520000 | 1111  | 18.58 | 18.74 | 18.85 | 18.99 | 18.98 | 19.01 | 18.72 |
| 0.663 | -0.20 | 0.87 Q6DFW4  | Nucleolar protein 58                                                             | Nop58       | 2506 | 26 | 26 | 26 | 49.6 | 49.6   | 49.6   | 60.342 | 0.0000 | 301.66    | 86125000  | 627   | 16.83 | 16.50 | 16.50 | 16.80 | 17.07 | 16.62 | 16.77 |
| 1.087 | -0.20 | 0.87 P63321  | Ras-related protein Rai-A                                                        | Rala        | 1503 | 10 | 5  | 5  | 51   | 26.7   | 26.7   | 23.553 | 0.0000 | 26.016    | 25829000  | 172   | 16.22 | 16.21 | 16.39 | 16.33 | 16.62 | 16.40 | 16.56 |
| 0.873 | -0.20 | 0.87 Q61990  | Poly(C)-binding protein 2                                                        | Pcbp2       | 2345 | 21 | 15 | 15 | 78.2 | 66.3   | 66.3   | 38.221 | 0.0000 | 264.14    | 112430000 | 395   | 18.06 | 17.95 | 18.27 | 18.46 | 18.32 | 18.28 | 18.28 |
| 0.455 | -0.20 | 0.87 Q6CX91  | Dehydrogenase/reductase SDR family member 7                                      | Dhrs7       | 3719 | 12 | 12 | 12 | 37.9 | 476.37 | 476.37 | 38.167 | 0.0000 | 65.317    | 21720000  | 169   | 15.79 | 15.67 | 15.86 | 16.01 | 15.72 | 16.01 | 16.39 |
| 0.686 | -0.20 | 0.87 P67499  | Telomerase protein component 1                                                   | Tp1         | 1665 | 16 | 16 | 16 | 10.1 | 10.1   | 10.1   | 291.46 | 0.0000 | 95.473    | 100600000 | 120   | 14.45 | 14.17 | 14.41 | 14.74 | 14.35 | 14.70 | 14.40 |
| 1.335 | -0.20 | 0.87 P46471  | 26S protease regulatory subunit 7                                                | Psmc2       | 1106 | 34 | 34 | 34 | 78.8 | 78.8   | 78.8   | 48.647 | 0.0000 | 323.31    | 193710000 | 808   | 18.23 | 17.99 | 18.15 | 18.34 | 18.35 | 18.42 | 18.21 |
| 0.075 | -0.21 | 0.87 Q91W52  | Transmembrane protein 19                                                         | Tmem19      | 4092 | 2  | 2  | 2  | 7.4  | 7.4    | 7.4    | 36.296 | 0.0009 | 3.6981    | 6343300   | 37    | 15.96 | 13.49 | 16.27 | 15.85 | 13.72 | 16.20 | 16.01 |
| 0.202 | -0.21 | 0.87 Q8VE49  | Vacuolar protein sorting-associated protein 4A                                   | Vps4a       | 4009 | 15 | 9  | 9  | 40.0 | 28.4   | 28.4   | 48.906 | 0.0000 | 54.192    | 9053200   | 99    | 13.86 | 14.14 | 15.03 | 14.61 | 14.26 | 14.21 | 15.28 |
| 0.532 | -0.21 | 0.87 Q8Z1R2  | Large proline-rich protein BA06                                                  | Bagl1       | 5800 | 23 | 23 | 23 | 31.9 | 31.9   | 31.9   | 121.04 | 0.0000 | 216.32    | 41630000  | 309   | 16.69 | 16.59 | 16.62 | 16.77 | 16.68 | 17.06 | 17.21 |
| 0.589 | -0.21 | 0.87 Q8DB59  | TBC domain-containing protein kinase-like protein                                | Tbck        | 3129 | 8  | 8  | 8  | 18.5 | 18.5   | 18.5   | 86.37  | 0.0000 | 25.333    | 28024000  | 54    | 16.57 | 16.83 | 17.35 | 17.74 | 13.69 | 18.99 | 18.08 |
| 1.396 | -0.21 | 0.87 P68317  | Oxysterol-binding protein domain protein 3                                       | Osbpl3      | 5176 | 14 | 13 | 13 | 21.1 | 21.1   | 21.1   | 96.965 | 0.0000 | 50.922    | 10508000  | 111   | 15.08 | 14.60 | 14.88 | 15.26 | 15.13 | 14.81 | 15.03 |
| 1.045 | -0.21 | 0.87 Q8BH07  | T-complex protein 1 subunit zeta                                                 | Ctfa        | 1594 | 37 | 37 | 32 | 61.4 | 61.4   | 58.2   | 58.004 | 0.0000 | 323.31    | 598070000 | 1903  | 19.10 | 18.98 | 19.02 | 19.11 | 19.34 | 18.18 | 19.34 |
| 1.228 | -0.21 | 0.87 Q8BJ34  | Poly(ADP-ribose) polymerase 1                                                    | Ptpr1       | 3033 | 18 | 18 | 18 | 53.3 | 48.6   | 48.6   | 56.7   | 0.0000 | 323.31    | 140440000 | 472   | 18.15 | 18.02 | 18.28 | 18.32 | 18.16 | 18.53 |       |
| 1.055 | -0.21 | 0.87 Q35382  | SUN domain-containing protein 2                                                  | Sun2        | 3084 | 40 | 39 | 39 | 63.9 | 63.9   | 62.8   | 81.604 | 0.0000 | 323.31    | 85062000  | 740   | 16.56 | 16.36 | 16.57 | 16.61 | 16.65 | 16.71 | 16.85 |
| 0.680 | -0.21 | 0.87 P61963  | Exocyst complex component 4                                                      | Exoc4       | 366  | 23 | 23 | 23 | 32.5 | 32.5   | 32.5   | 110.54 | 0.0000 | 189.12    | 31477000  | 303   | 15.79 | 15.50 | 15.75 | 15.76 | 15.96 | 15.86 | 15.98 |
| 0.324 | -0.21 | 0.87 Q8Q714  | DBP1- and CUL4-associated factor 7                                               | Dcaf7       | 1394 | 4  | 4  | 4  | 12.6 | 12.6   | 12.6   | 38.926 | 0.0000 | 7.3118    | 4570900   | 54    | 15.03 | 15.00 | 14.92 | 15.17 | 15.42 | 15.30 | 14.87 |
| 0.364 | -0.21 | 0.86 Q6VN88  | WD repeat and FYVE domain-containing protein 3                                   | Wdrf3       | 2664 | 27 | 27 | 27 | 11.1 | 11.1   | 11.1   | 392.33 | 0.0000 | 93.661    | 16395000  | 161   | 14.58 | 13.96 | 14.34 | 14.73 | 14.60 | 14.67 | 14.02 |
| 0.639 | -0.21 | 0.86 Q8JHW2  | Omega-amidase NIT2                                                               | Nit2        | 5376 | 19 | 19 | 19 | 87.7 | 87.7   | 87.7   | 30.501 | 0.0000 | 156.72    | 40913000  | 293   | 16.47 | 16.51 | 16.53 | 16.61 | 17.09 | 16.66 | 16.49 |
| 0.118 | -0.21 | 0.86 Q8YV63  | MOB kinase activator 2                                                           | Mob2        | 4029 | 5  | 5  | 4  | 20   | 20     | 20     | 26.851 | 0.0000 | 9.5597    | 4890500   | 48    | 14.50 | 12.65 | 14.24 | 14.88 | 13.26 | 14.62 | 13.48 |
| 0.435 | -0.21 | 0.86 P33610  | DNA primase large subunit                                                        | Prim2       | 1003 | 11 | 11 | 11 | 25.7 | 25.7   | 25.7   | 58.408 | 0.0000 | 18.816    | 4565700   | 39    | 13.71 | 13.71 | 13.46 | 14.24 | 13.87 | 13.72 | 13.44 |
| 1.088 | -0.21 | 0.86 B2R934  | Plexin-B5                                                                        | PlexnB5     | 86   | 48 | 48 | 47 | 30.8 | 30.8   | 30.8   | 206.23 | 0.0000 | 323.31    | 141470000 | 833   | 17.53 | 17.42 | 17.34 | 17.85 | 17.58 | 17.60 | 17.54 |
| 0.120 | -0.21 | 0.86 P10630  | Eukaryotic initiation factor 4A-II;Eukaryotic initiation factor 4A-II, N-termina | Eif4a2      | 725  | 7  | 7  | 7  | 52.6 | 23.8   | 23.8   | 46.402 | 0.0000 | 62.978    | 3068600   | 54    | 14.53 | 14.52 | 12.57 | 13.40 | 14.68 | 13.80 | 14.45 |
| 1.899 | -0.21 | 0.86 Q9RLB2  | Dehydrogenase/reductase SDR family member 4                                      | Dhrs4       | 4413 | 8  | 8  | 8  | 25.8 | 25.8   | 25.8   | 29.884 | 0.0000 | 17.097    | 12772000  | 147   | 15.00 | 14.97 | 14.94 | 15.25 | 15.27 | 15.12 | 15.08 |
| 0.731 | -0.21 | 0.86 Q3JUB25 | MIF4G domain-containing protein                                                  | Mif4g       | 1943 | 2  | 2  | 2  | 17.6 | 17.6   | 17.6   | 25.493 | 0.0000 | 10.505    | 10270000  | 6     | 13.07 | 13.07 | 13.06 | 14.10 | 13.63 | 13.72 | 13.44 |
| 1.191 | -0.21 | 0.86 Q9JUM7  | Mannosyl-oligosaccharide glucosidase                                             | Mogg        | 2833 | 22 | 22 | 22 | 34.1 | 34.1   | 34.1   | 91.83  | 0.0000 | 158.53    | 31568000  | 300   | 15.93 | 15.90 | 15.98 | 15.92 | 16.16 | 16.01 | 16.06 |
| 0.230 | -0.21 | 0.86 P00375  | Dihydrofolate reductase                                                          | Dhfr        | 609  | 15 | 15 | 15 | 75.9 | 75.9   | 75.9   | 21.606 | 0.0000 | 130.13    | 41741000  | 218   | 17.24 | 17.28 | 17.59 | 16.79 | 18.11 | 17.98 | 17.45 |
| 1.178 | -0.21 | 0.86 Q9CQ26  | NADH dehydrogenase [ubiquinone] 1 beta subcomplex subunit 3                      | Ndubf3      | 4652 | 5  | 5  | 5  | 42.3 | 42.3   | 42.3   | 11.692 | 0.0000 | 10.34     | 13581000  | 50    | 16.27 | 16.45 | 16.31 | 16.63 | 16.62 | 16.35 | 16.61 |
| 0.903 | -0.21 | 0.86 Q2TBE6  | Phosphatidylinositol 4-kinase type 2-alpha                                       | Plk4a2a     | 1801 | 17 | 17 | 17 | 46.3 | 46.3   | 46.3   | 54.257 | 0.0000 | 136.13    | 32753000  | 265   | 16.13 | 15.77 | 15.83 | 16.26 | 16.02 | 16.03 | 16.17 |
| 0.363 | -0.21 | 0.86 P36993  | 5S rRNA pseudouridine C5-demethylase                                             | C5mr1       | 981  | 4  | 4  | 4  | 7.4  | 7.4    | 7.4    | 39.023 | 0.0000 | 13.34     | 33417000  | 133   | 16.55 | 16.27 | 16.18 | 16.55 | 16.27 | 16.18 | 16.55 |
| 0.241 | -0.21 | 0.86 Q70496  | H+(+)Cl(-) exchange transporter 7                                                | Cln7        | 509  | 15 | 15 | 15 | 15   | 24.4   | 24.4   | 88.712 | 0.0000 | 111.05    | 24449000  | 172   | 16.25 | 15.87 | 16.06 | 15.82 | 15.80 | 17.00 | 16.48 |
| 0.126 | -0.21 | 0.86 Q99ME2  | WD repeat-containing protein 6                                                   | Wdr6        | 4463 | 10 | 10 | 10 | 14   | 14     | 12.1   | 9.0000 | 32.36  | 4091900   | 31        | 14.77 | 14.62 | 13.50 | 14.51 | 15.40 | 14.61 | 13.12 |       |
| 1.340 | -0.21 | 0.86 Q8VDN2  | Sodium/potassium-transporting ATPase subunit alpha-1                             | Atp1a1      | 3962 | 70 | 70 | 48 | 52.9 | 52.9   | 41.1   | 112.98 | 0.0000 | 133.41    | 80607000  | 2486  | 19.13 | 19.62 | 19.65 | 19.95 | 19.84 | 19.89 | 19.71 |
| 0.376 | -0.21 | 0.86 Q70480  | 5S rRNA-associated membrane protein 4                                            | Atp1a1      | 3962 | 70 | 70 | 48 | 52.9 | 52.9   | 41.1   | 112.98 | 0.0000 | 133.41    | 80607000  | 2486  | 19.13 | 19.62 | 19.65 | 19.95 | 19.84 | 19.89 | 19.71 |
| 0.129 | -0.22 | 0.86 Q61462  | Cytochrome b-245 light chain                                                     | Cyba        | 2301 | 2  | 2  | 2  | 19.8 | 19.8   | 19.8   | 20.748 | 0.0000 | 75.219    | 10753000  | 114   | 18.84 | 18.11 | 18.63 | 19.56 | 17.32 | 19.34 | 18.75 |
| 0.985 | -0.22 | 0.86 P23591  | GDP-L-ucose synthase                                                             | Tata3       | 886  | 17 | 17 | 17 | 46.1 | 46.1   | 46.1   | 35.777 | 0.0000 | 193.76    | 42643000  | 305   | 16.78 | 16.63 | 16.59 | 16.99 | 16.67 | 16.84 | 17.03 |
| 0.779 | -0.22 | 0.86 Q8R053  | Coronin-1A                                                                       | Coro1a      | 569  | 37 | 36 | 35 | 67   | 66.2   | 64.8   | 50.989 | 0.0000 | 323.31    | 873280000 | 1381  | 19.69 | 20.15 | 19.93 | 20.21 | 20.21 | 19.96 | 20.20 |
| 1.482 | -0.22 | 0.86 Q9Z1M7  | Fam64                                                                            | Fam64       | 423  | 26 | 26 | 24 | 69.8 | 69.8   | 36.776 | 0.0000 | 323.31 | 292870000 | 846       | 19.38 | 19.33 | 19.33 | 19.38 | 19.33 | 19.33 | 19.38 |       |
| 0.124 | -0.22 | 0.86 Q8R053  | Protein phosphatase 1 regulatory subunit 12B                                     | Ppp1r12b    | 2969 | 8  | 8  | 8  | 6.6  | 7.1    | 7.1    | 109.05 | 0.0000 | 8.209     | 3747700   | 18    | 13.12 | 13.52 | 13.14 | 14.87 | 14.99 | 13.81 | 12.74 |
| 0.431 | -0.22 | 0.86 Q9JUF9  | Signal peptide peptidase-like 2A                                                 | Spp2a       | 5426 | 5  | 5  | 5  | 13.4 | 13.4   | 13.4   | 58.128 | 0.0000 | 68.384    | 9578100   | 73    | 14.87 | 15.08 | 14.95 | 15.62 | 14.74 | 15.24 | 15.12 |
| 0.285 | -0.22 | 0.86 P36536  | GTP-binding protein SAR1a                                                        | Sar1a       | 1042 | 13 | 13 | 9  | 51.5 | 51.5   | 44.4   | 22.371 | 0.0000 | 124.75    | 89746000  | 256   | 18.48 | 18.85 | 18.82 | 18.43 | 19.52 | 18.61 | 19.17 |
| 0.829 | -0.22 | 0.86 Q8C181  | Muscleblind-like protein 2                                                       | Mbln2       | 3359 | 15 | 5  | 5  | 38.3 | 16.9   | 16.9   | 40.195 | 0.0000 | 70.847    | 15544000  | 108   | 16.51 | 16.71 | 16.80 | 17.03 | 17.04 | 16.66 | 16.84 |
| 0.608 | -0.22 | 0.86 Q9C1T0  | Ran-binding protein 3                                                            | Ranbp3      | 2212 | 8  | 8  | 8  | 22.6 | 22.6   | 22.6   | 52.572 | 0.0000 | 42.038    | 8292700   | 103   | 15.12 | 15.33 | 15.74 | 15.12 | 15.74 | 15.32 | 15.41 |
| 0.158 | -0.22 | 0.86 Q5CFM8  | RNA-binding protein 27                                                           | Rbm27       | 2130 | 10 | 10 | 9  | 10.6 | 10.6   | 10.6   | 118.55 | 0.0000 | 36.18     | 4127700   | 48    | 13.21 | 13.44 | 14.40 | 14.13 | 12.87 | 14.60 | 14.02 |
| 1.042 | -0.22 | 0.86 P08249  | Maleate dehydrogenase, mitochondrial                                             | Mdh2        | 684  | 34 | 34 | 34 | 75.4 | 75.4   | 75.4   | 35.511 | 0.0000 | 323.31    | 131470000 | 1758  | 20.62 | 20.75 | 20.53 | 20.97 | 20.94 | 20.86 | 20.63 |
| 1.548 | -0.22 | 0.86 P46062  | Signal-induced proliferation-associated protein 1                                | Spa1        | 112  | 27 | 27 | 27 | 32.1 | 32.1   | 32.1   | 112.06 | 0.0000 | 155.61    | 54544000  | 404   | 16.79 | 16.65 | 16.72 | 16.90 | 17.03 | 16.81 | 17.03 |
| 1.041 | -0.22 | 0.86 Q9CXT8  | Mitochondrial-processing peptidase subunit beta                                  | Atp1a1      | 3962 | 70 | 70 | 48 | 52.9 | 52.9   | 41.1   | 112.98 | 0.0000 | 133.41    | 80607000  | 2486  | 19.13 | 19.62 | 19.65 | 19.95 | 19.84 | 19.89 | 19.71 |
| 0.205 | -0.22 | 0.86 Q8BH02  | Torsin-4A                                                                        | Tor4a       | 3700 | 12 | 12 | 12 | 39   | 39     | 39     | 47.585 | 0.0000 | 146.44    | 22049000  | 206   | 15.23 | 15.69 | 16.00 | 16.12 | 14.91 | 16.28 | 16.14 |
| 0.949 | -0.22 | 0.86 P13864  | DNA (cytosine-5)-methyltransferase 1                                             | Dnmt1       | 3004 | 36 | 36 | 36 | 30.2 | 30.2   | 30.2   | 183.19 | 0.0000 | 126.28    | 37291000  | 395   | 16.32 | 16.42 | 16.22 | 16.29 | 16.68 | 16.64 | 16.55 |
| 0.970 | -0.22 | 0.86 Q8BYW1  | Rho GTPase-activating protein 25                                                 | Arhgap25    | 3377 | 40 | 40 | 39 | 78.1 | 78.1   | 78.1   | 73.362 | 0.0000 | 323.31    | 87090000  | 671   | 16.89 | 17.05 | 17.13 | 17.25 | 17.47 | 17.08 | 17.18 |
| 0.437 | -0.22 | 0.86 Q6D575  | Kinesin-like protein KIF1B                                                       | Kif1b       | 2309 | 23 | 23 | 23 | 15.1 | 15.1   | 15.1   | 20.677 | 0.0000 | 35.719    | 25050000  | 240   | 15.78 | 15.69 | 15.78 | 15.86 | 16.26 | 15.89 | 15.78 |
| 0.773 | -0.22 | 0.86 Q7TSF10 | Desmoglein-1-beta;Desmoglein-1-alpha                                             | Dsg1b;Dsg1a | 2307 | 5  | 5  | 5  | 3.4  | 3.4    | 3.4    | 114.45 | 0.0000 | 9.9617    | 14194000  | 3     |       |       |       |       |       |       |       |

|       |       |      |        |                                                                                            |          |        |    |    |      |      |      |        |        |        |          |           |       |       |       |       |       |       |       |       |
|-------|-------|------|--------|--------------------------------------------------------------------------------------------|----------|--------|----|----|------|------|------|--------|--------|--------|----------|-----------|-------|-------|-------|-------|-------|-------|-------|-------|
| 0.591 | -0.25 | 0.84 | Q9ERU9 | E3 SUMO-protein ligase RanBP2                                                              | Ranbp2   | 5320   | 71 | 71 | 70   | 29.8 | 29.8 | 29.5   | 341.12 | 0.0000 | 323.31   | 99914000  | 714   | 18.25 | 18.09 | 18.24 | 18.68 | 18.63 | 18.46 | 17.99 |
| 1.115 | -0.25 | 0.84 | Q8BFH4 | N-acetylglucosamine kinase                                                                 | Galk2    | 2475   | 23 | 23 | 23   | 56.3 | 56.3 | 56.3   | 50.503 | 0.0000 | 323.31   | 67146000  | 390   | 17.45 | 17.18 | 17.30 | 17.68 | 17.58 | 17.63 | 17.34 |
| 0.440 | -0.25 | 0.84 | Q8BH60 | Golgi-associated PDZ and coiled-coil motif-containing protein                              | Gopc     | 3016   | 7  | 7  | 7    | 15.3 | 15.3 | 15.3   | 50.662 | 0.0000 | 8.7531   | 4394800   | 43    | 14.12 | 14.47 | 14.95 | 14.41 | 14.81 | 14.94 | 14.87 |
| 1.876 | -0.25 | 0.84 | Q9RLM2 | CDK5 regulatory subunit-associated protein 3                                               | Cdkrap3  | 4440   | 11 | 11 | 11   | 26.2 | 26.2 | 26.2   | 56.99  | 0.0000 | 24.073   | 13779000  | 149   | 15.48 | 15.31 | 15.52 | 15.73 | 15.66 | 15.75 | 15.81 |
| 0.388 | -0.25 | 0.84 | Q9RLU0 | Charged multivesicular body protein 1b-1                                                   | Chmbp1b1 | 22.124 | 5  | 5  | 2    | 20.6 | 20.6 | 20.6   | 22.124 | 0.0000 | 15.094   | 22317000  | 100   | 15.75 | 16.67 | 16.73 | 17.04 | 16.67 | 17.04 | 16.99 |
| 1.215 | -0.25 | 0.84 | Q8C011 | Alkylglyoxaloxycarboxylphosphate synthase, peroxisomal                                     | Agps     | 3337   | 31 | 31 | 31   | 56.3 | 56.3 | 56.3   | 71.683 | 0.0000 | 281.96   | 101300000 | 636   | 17.13 | 17.10 | 17.22 | 17.23 | 17.31 | 17.42 | 17.62 |
| 1.124 | -0.25 | 0.84 | P97287 | Induced myeloid leukemia cell differentiation protein Mcl-1 homolog                        | Mcl1     | 1617   | 11 | 11 | 11   | 51.1 | 51.1 | 51.1   | 35.217 | 0.0000 | 57.391   | 29590000  | 201   | 16.58 | 16.40 | 16.41 | 16.69 | 16.95 | 16.58 | 16.62 |
| 1.026 | -0.25 | 0.84 | Q8K0G5 | Protein TSSC1                                                                              | Tssc1    | 3606   | 4  | 4  | 4    | 16.3 | 16.3 | 16.3   | 43.126 | 0.0000 | 23.597   | 8520000   | 124   | 15.14 | 15.16 | 15.21 | 15.54 | 15.58 | 15.43 | 15.14 |
| 1.412 | -0.25 | 0.84 | Q9JUM4 | Coronin-1C                                                                                 | Coro1c   | 5716   | 46 | 46 | 41   | 67.5 | 67.5 | 67.5   | 53.12  | 0.0000 | 323.31   | 547230000 | 1479  | 19.08 | 19.23 | 19.30 | 19.34 | 19.37 | 19.49 | 19.58 |
| 1.328 | -0.25 | 0.84 | Q9R6S3 | Dihydropyrimidinase-related protein 2                                                      | Dhpyr2   | 47     | 47 | 47 | 42   | 80.6 | 80.6 | 80.6   | 62.277 | 0.0000 | 323.31   | 90326000  | 1907  | 19.02 | 19.48 | 19.48 | 19.88 | 19.89 | 19.76 | 19.87 |
| 0.684 | -0.25 | 0.84 | Q8CCN5 | Breast carcinoma-amplified sequence 3 homolog                                              | Bcas3    | 3451   | 11 | 11 | 11   | 18.1 | 18.1 | 18.1   | 101.02 | 0.0000 | 75.917   | 10227000  | 128   | 15.32 | 14.94 | 15.31 | 15.77 | 15.24 | 15.42 | 15.33 |
| 0.261 | -0.25 | 0.84 | Q9MRP6 | Serrate RNA effector molecule homolog                                                      | Srtt     | 4474   | 46 | 46 | 46   | 44.2 | 44.2 | 44.2   | 100.45 | 0.0000 | 258.49   | 72929000  | 631   | 17.30 | 17.49 | 17.50 | 17.67 | 17.70 | 17.67 | 17.67 |
| 1.772 | -0.25 | 0.84 | Q8BJW6 | Eukaryotic translation initiation factor 2A:Eukaryotic translation initiation factor eIF2a | eIF2a    | 3089   | 30 | 30 | 30   | 64   | 64   | 64     | 64.403 | 0.0000 | 323.31   | 108960000 | 728   | 17.31 | 17.40 | 17.40 | 17.47 | 17.66 | 17.60 | 17.74 |
| 0.219 | -0.25 | 0.84 | P58802 | TBC1 domain family member 10A                                                              | Tbc1d10a | 1324   | 5  | 5  | 13   | 13.4 | 13.4 | 13.4   | 56.202 | 0.0000 | 15.786   | 3416100   | 46    | 13.75 | 13.64 | 14.47 | 12.79 | 14.26 | 14.11 |       |
| 2.141 | -0.25 | 0.84 | Q9JUL8 | Hepatocyte growth factor-regulated tyrosine kinase substrate                               | Hgs      | 4434   | 21 | 21 | 20   | 32.4 | 32.4 | 31.4   | 86.014 | 0.0000 | 139.57   | 24375000  | 185   | 16.03 | 16.04 | 16.13 | 16.30 | 16.31 | 16.43 | 16.22 |
| 0.859 | -0.25 | 0.84 | Q8R081 | Heterogeneous nuclear ribonucleoprotein L                                                  | Hnmp1    | 3750   | 31 | 31 | 31   | 61.6 | 61.6 | 61.6   | 63.963 | 0.0000 | 323.31   | 324740000 | 1095  | 18.75 | 19.06 | 19.12 | 19.05 | 19.47 | 19.16 | 19.23 |
| 0.766 | -0.25 | 0.84 | P60867 | 40S ribosomal protein S20                                                                  | Rps20    | 1363   | 13 | 13 | 13   | 79.8 | 79.8 | 79.8   | 13.373 | 0.0000 | 235.24   | 422050000 | 909   | 19.40 | 19.72 | 19.90 | 19.84 | 20.14 | 19.76 | 19.97 |
| 2.046 | -0.25 | 0.84 | Q89110 | Caspase-8/Caspase-6 subunit p18/Caspase-8 subunit p10                                      | Casp8    | 605    | 32 | 32 | 32   | 71.7 | 71.7 | 71.7   | 55.356 | 0.0000 | 161.6    | 86857000  | 749   | 16.68 | 16.76 | 16.78 | 17.12 | 17.00 | 16.95 | 16.99 |
| 0.336 | -0.25 | 0.84 | Q70305 | Ataxin-2                                                                                   | Atxn2    | 484    | 5  | 5  | 5    | 6.5  | 6.5  | 6.5    | 136.48 | 0.0000 | 25.907   | 3957500   | 62    | 13.75 | 13.90 | 14.23 | 14.23 | 15.12 | 14.45 | 14.65 |
| 0.151 | -0.25 | 0.84 | Q8C078 | Calcium/calmodulin-dependent protein kinase kinase 2                                       | Camkk2   | 3326   | 8  | 8  | 8    | 18.4 | 18.4 | 18.4   | 64.617 | 0.0000 | 26.601   | 6020700   | 63    | 13.69 | 13.41 | 12.81 | 14.59 | 12.56 | 14.21 | 12.85 |
| 2.232 | -0.25 | 0.84 | Q08788 | Dynactin subunit 1                                                                         | Dctn1    | 299    | 56 | 56 | 56   | 49.2 | 49.2 | 49.2   | 141.67 | 0.0000 | 323.31   | 143300000 | 1079  | 17.10 | 17.17 | 17.21 | 17.40 | 17.53 | 17.38 | 17.35 |
| 0.893 | -0.25 | 0.84 | P62331 | ADP-ribosylation factor 6                                                                  | Arf6     | 1426   | 10 | 10 | 10   | 66.9 | 66.9 | 66.9   | 20.082 | 0.0000 | 156.51   | 40720000  | 299   | 16.64 | 16.66 | 16.53 | 16.55 | 16.65 | 16.67 | 17.01 |
| 0.474 | -0.25 | 0.84 | Q9JXJ7 | Nuclear RNA export factor 1                                                                | Nxf1     | 4255   | 19 | 19 | 19   | 39.8 | 39.8 | 39.8   | 70.296 | 0.0000 | 84.122   | 26203000  | 276   | 15.72 | 15.78 | 16.00 | 15.89 | 16.65 | 15.91 | 15.98 |
| 0.649 | -0.25 | 0.84 | Q08582 | GTP-binding protein 1                                                                      | Gtpbp1   | 275    | 22 | 22 | 22   | 40.3 | 40.3 | 40.3   | 72.3   | 0.0000 | 150.25   | 4214000   | 355   | 16.39 | 16.35 | 16.34 | 16.21 | 16.77 | 16.54 | 16.93 |
| 0.284 | -0.25 | 0.84 | Q9D7H3 | RNA 3-terminal phosphate cyclase                                                           | RtcA     | 2030   | 8  | 8  | 8    | 32.2 | 32.2 | 32.2   | 39.254 | 0.0000 | 51.267   | 6760700   | 81    | 14.70 | 14.45 | 14.29 | 15.20 | 15.30 | 14.25 | 14.19 |
| 0.177 | -0.25 | 0.84 | Q6S5S7 | Histone H2A type 2-A/Histone H2A type 2-C                                                  | Hist2aa1 | 5515   | 13 | 13 | 13   | 77.7 | 77.7 | 77.7   | 14.095 | 0.0000 | 323.31   | 554760000 | 1865  | 23.75 | 24.96 | 23.76 | 24.70 | 25.31 | 24.96 | 19.07 |
| 1.031 | -0.25 | 0.84 | Q9BMA4 | Signal recognition particle subunit SRP95                                                  | Srp95    | 3130   | 35 | 35 | 35   | 60.3 | 60.3 | 60.3   | 33.721 | 0.0000 | 323.31   | 88518000  | 656   | 16.93 | 16.57 | 16.85 | 16.86 | 16.57 | 16.85 | 17.02 |
| 2.736 | -0.25 | 0.84 | Q0GNC1 | Inverted formin-2                                                                          | Ifn2     | 1774   | 25 | 25 | 25   | 30.5 | 30.5 | 30.5   | 138.56 | 0.0000 | 230.98   | 53267000  | 403   | 17.13 | 16.99 | 17.14 | 17.31 | 17.37 | 17.35 | 17.33 |
| 0.542 | -0.26 | 0.84 | Q8ZQ06 | CAD protein;Glutamine-dependent carboxymalyl-phosphate synthase;Aspartyl-Cad               | Aspcad   | 637    | 43 | 43 | 43   | 27   | 27   | 27     | 243.24 | 0.0000 | 323.31   | 75280000  | 637   | 16.79 | 16.84 | 16.50 | 17.20 | 16.83 | 16.89 | 16.40 |
| 0.767 | -0.26 | 0.84 | Q8JZK4 | Splicing factor 45                                                                         | Rbm17    | 3586   | 8  | 8  | 8    | 24   | 24   | 24     | 45.303 | 0.0000 | 31.787   | 15830000  | 139   | 15.87 | 16.34 | 16.25 | 16.62 | 16.36 | 16.47 | 16.19 |
| 1.317 | -0.26 | 0.84 | P70122 | Spliceosome maturation protein SBDS                                                        | Sbds     | 1529   | 68 | 68 | 18   | 68.8 | 68.8 | 68.8   | 28.78  | 0.0000 | 105.54   | 46726000  | 303   | 16.32 | 16.38 | 16.41 | 16.49 | 16.50 | 16.49 | 16.50 |
| 0.052 | -0.26 | 0.84 | Q5A825 | Bystin                                                                                     | Bystn    | 426    | 6  | 6  | 6    | 18.8 | 18.8 | 18.8   | 49.783 | 0.0000 | 25.026   | 4590900   | 93    | 14.50 | 14.24 | 16.41 | 14.43 | 14.71 | 14.61 | 15.13 |
| 1.468 | -0.26 | 0.84 | Q8CHC4 | Synaptotagmin-1                                                                            | Synj1    | 3521   | 32 | 32 | 32   | 30.2 | 30.2 | 30.2   | 172.62 | 0.0000 | 322.53   | 68612000  | 521   | 16.30 | 16.04 | 16.15 | 16.50 | 16.32 | 16.52 | 16.34 |
| 0.281 | -0.26 | 0.84 | Q56A08 | G patch domain and KOW motifs-containing protein                                           | Gpkow    | 2088   | 15 | 15 | 15   | 37.1 | 37.1 | 37.1   | 53.831 | 0.0000 | 35.408   | 17841000  | 163   | 14.86 | 15.44 | 15.71 | 14.80 | 15.89 | 15.84 | 15.84 |
| 1.499 | -0.26 | 0.84 | Q70133 | ATP-dependent RNA helicase A                                                               | Rhlfa    | 470    | 40 | 40 | 40   | 40.9 | 40.9 | 40.9   | 149.47 | 0.0000 | 323.31   | 204580000 | 1291  | 17.95 | 18.06 | 18.06 | 18.06 | 18.06 | 18.06 | 18.06 |
| 1.447 | -0.26 | 0.84 | P35282 | Ras-related protein Rab-21                                                                 | Rab21    | 1015   | 14 | 14 | 14   | 56.3 | 56.3 | 56.3   | 24.106 | 0.0000 | 107.42   | 74175000  | 361   | 16.07 | 17.97 | 18.10 | 18.28 | 18.50 | 18.15 | 18.29 |
| 0.834 | -0.26 | 0.84 | Q8R1A4 | Dedicator of cytokinesis protein 7                                                         | Dock7    | 3782   | 36 | 34 | 34   | 22.4 | 21.2 | 21.2   | 241.44 | 0.0000 | 146.95   | 46772000  | 463   | 15.83 | 15.58 | 15.88 | 15.68 | 15.92 | 16.03 | 16.19 |
| 0.076 | -0.26 | 0.84 | Q8YVD0 | PH-interacting protein                                                                     | Phip     | 3950   | 7  | 7  | 7    | 4.6  | 4.6  | 4.6    | 206.72 | 0.0000 | 14.054   | 11630000  | 52    | 16.34 | 15.70 | 15.85 | 13.22 | 17.73 | 16.81 | 17.13 |
| 1.116 | -0.26 | 0.84 | Q8CD23 | Leukodermatolysin protein VCP135                                                           | Vcp1     | 3461   | 31 | 31 | 31   | 31.7 | 31.7 | 31.7   | 134.51 | 0.0000 | 105.54   | 16300000  | 628   | 16.08 | 15.74 | 15.85 | 16.08 | 15.85 | 16.08 | 16.08 |
| 0.819 | -0.26 | 0.83 | P20029 | 78 kDa glucose-regulated protein                                                           | Hspa5    | 551    | 68 | 66 | 66   | 69.5 | 69.5 | 69.5   | 72.421 | 0.0000 | 323.31   | 174950000 | 2902  | 20.76 | 21.13 | 21.21 | 21.41 | 21.04 | 21.37 | 21.38 |
| 1.149 | -0.26 | 0.83 | Q5XG73 | Acyl-CoA-binding domain-containing protein 5                                               | Acbd5    | 2171   | 11 | 11 | 11   | 26.6 | 26.6 | 26.6   | 56.613 | 0.0000 | 41.914   | 15879000  | 106   | 15.56 | 15.20 | 15.59 | 15.73 | 15.80 | 15.70 | 15.62 |
| 0.546 | -0.26 | 0.83 | Q8K337 | Type II inositol 1,4,5-trisphosphate 5-phosphatase                                         | Inpp5b   | 3687   | 5  | 5  | 5    | 6.7  | 6.7  | 6.7    | 112.76 | 0.0000 | 19.876   | 6953900   | 58    | 14.83 | 14.45 | 14.65 | 15.22 | 14.44 | 14.91 | 15.08 |
| 0.430 | -0.26 | 0.83 | Q9Z226 | Mitochondrial carnitine/acetylarnitine carrier protein                                     | Slc25a20 | 5874   | 9  | 9  | 9    | 42.5 | 42.5 | 42.5   | 33.026 | 0.0000 | 34.35    | 19327000  | 81    | 16.15 | 16.11 | 15.34 | 15.78 | 16.37 | 16.29 | 16.10 |
| 0.488 | -0.26 | 0.83 | Q9JUM4 | Mitochondrial carnitine/acetylarnitine carrier protein                                     | Slc25a20 | 5874   | 9  | 9  | 9    | 42.5 | 42.5 | 42.5   | 33.026 | 0.0000 | 34.35    | 19327000  | 81    | 16.15 | 16.11 | 15.34 | 15.78 | 16.37 | 16.29 | 16.10 |
| 2.010 | -0.26 | 0.83 | Q9JUM4 | Mitochondrial carnitine/acetylarnitine carrier protein                                     | Slc25a20 | 5874   | 9  | 9  | 9    | 42.5 | 42.5 | 42.5   | 33.026 | 0.0000 | 34.35    | 19327000  | 81    | 16.15 | 16.11 | 15.34 | 15.78 | 16.37 | 16.29 | 16.10 |
| 0.347 | -0.27 | 0.83 | P11672 | Nitrophil gelatinase-associated lipocalin                                                  | Lcn2     | 748    | 5  | 5  | 5    | 28.5 | 28.5 | 28.5   | 22.875 | 0.0000 | 10.456   | 3434200   | 30    | 12.03 | 13.06 | 13.17 | 12.73 | 13.11 | 13.12 | 13.12 |
| 1.363 | -0.27 | 0.83 | P18653 | Ribosomal protein S6 kinase alpha-1                                                        | Rps6ka1  | 839    | 37 | 37 | 24   | 52.9 | 52.9 | 52.9   | 81.594 | 0.0000 | 234.71   | 91418000  | 731   | 16.64 | 16.50 | 16.57 | 16.97 | 16.98 | 16.69 | 16.71 |
| 0.909 | -0.27 | 0.83 | Q8C1H9 | Cell division cycle and apoptosis regulator protein 1                                      | Ccna1    | 3517   | 20 | 20 | 21.9 | 21.9 | 21.9 | 132.06 | 0.0000 | 168.54 | 33251000 | 303       | 16.28 | 16.56 | 16.68 | 16.45 | 16.77 | 16.91 | 16.91 |       |
| 0.927 | -0.27 | 0.83 | A1L314 | Macrophage-expressed gene 1 protein                                                        | Mpeg1    | 4      | 24 | 24 | 24   | 33.9 | 33.9 | 33.9   | 78.39  | 0.0000 | 253.16   | 33623000  | 813   | 19.80 | 19.62 | 19.69 | 20.22 | 19.72 | 20.09 | 19.84 |
| 0.497 | -0.27 | 0.83 | Q8BQ24 | Rat GTPase-activating protein subunit beta                                                 | Ralgapb  | 3174   | 9  | 9  | 9    | 9.1  | 9.1  | 9.1    | 165.2  | 0.0000 | 24.901   | 3693900   | 39    | 14.38 | 14.05 | 13.90 | 14.35 | 14.29 | 14.85 | 14.01 |
| 0.319 | -0.27 | 0.83 | Q9D4H2 | GRIP and coiled-coil domain-containing protein                                             | Gccl     | 4977   | 6  | 6  | 6    | 11.1 | 11.1 | 11.1   | 87.676 | 0.0000 | 14.475   |           |       |       |       |       |       |       |       |       |

|       |       |             |                                                             |         |      |    |    |    |      |      |      |         |        |         |           |      |       |       |       |       |       |       |       |
|-------|-------|-------------|-------------------------------------------------------------|---------|------|----|----|----|------|------|------|---------|--------|---------|-----------|------|-------|-------|-------|-------|-------|-------|-------|
| 1.640 | -0.29 | 0.82 Q3TPX4 | Exocyst complex component 5                                 | Exoc5   | 1867 | 19 | 19 | 19 | 38   | 38   | 38   | 81.737  | 0.0000 | 130.82  | 18172000  | 226  | 15.22 | 15.06 | 15.24 | 15.52 | 15.33 | 15.61 | 15.39 |
| 1.008 | -0.29 | 0.82 PE2313 | U6 snRNA-associated Sm-like protein LSM6                    | Lsm6    | 1421 | 7  | 7  | 7  | 50   | 50   | 50   | 9.1275  | 0.0000 | 10.338  | 10196000  | 118  | 15.38 | 15.17 | 15.35 | 15.52 | 15.50 | 15.39 | 15.53 |
| 0.904 | -0.29 | 0.82 Q3UQ44 | Ras GTPase-activating-like protein IQGAP2                   | Iqgap2  | 2016 | 67 | 64 | 64 | 46.1 | 44.4 | 44.4 | 180.53  | 0.0000 | 30.331  | 135090000 | 1261 | 16.84 | 16.53 | 16.85 | 16.87 | 16.81 | 17.18 | 17.24 |
| 0.366 | -0.29 | 0.82 Q8OUU9 | Membrane-associated progesterone receptor component 2       | Pgrmc2  | 2839 | 7  | 7  | 7  | 38.7 | 38.7 | 38.7 | 23.334  | 0.0000 | 68.638  | 13147000  | 114  | 15.63 | 16.01 | 15.78 | 15.92 | 16.89 | 15.70 | 15.88 |
| 0.889 | -0.29 | 0.82 Q8RVU5 | Shc-like protein 2                                          | Shc2    | 5718 | 19 | 18 | 18 | 57.8 | 57.8 | 57.8 | 44.5032 | 0.0000 | 78.976  | 27387000  | 239  | 15.42 | 15.37 | 15.27 | 15.52 | 15.89 | 15.57 | 15.50 |
| 0.564 | -0.29 | 0.82 Q8K2V1 | Serine/threonine-protein phosphatase 4 regulatory subunit 1 | Ppp4r1  | 3674 | 13 | 13 | 13 | 17.8 | 17.8 | 17.8 | 106.3   | 0.0000 | 31.539  | 21106000  | 195  | 16.40 | 15.98 | 16.26 | 16.96 | 16.20 | 16.80 | 16.25 |
| 0.336 | -0.29 | 0.82 Q6P5B0 | RRP12-like protein                                          | Rrp12   | 2569 | 17 | 17 | 17 | 17.9 | 17.9 | 17.9 | 143.13  | 0.0000 | 91.951  | 13531000  | 145  | 14.99 | 14.89 | 15.21 | 15.25 | 14.61 | 15.34 | 16.06 |
| 1.128 | -0.29 | 0.82 Q9D1M4 | Eukaryotic translation elongation factor 1 epsilon-1        | Eef1e1  | 4926 | 8  | 8  | 8  | 54.6 | 54.6 | 54.6 | 18.959  | 0.0000 | 125.17  | 23533000  | 152  | 15.97 | 16.13 | 16.40 | 16.43 | 16.61 | 16.46 | 16.31 |
| 1.245 | -0.29 | 0.82 Q3TJDT | PDZ and LIM domain protein                                  | Pdlim7  | 1853 | 7  | 7  | 7  | 23.4 | 23.4 | 23.4 | 50.118  | 0.0000 | 22.286  | 6386500   | 70   | 14.39 | 14.23 | 14.65 | 14.67 | 14.64 | 14.68 | 14.88 |
| 0.351 | -0.29 | 0.82 Q8QJY2 | E3 ubiquitin-protein ligase KCMF1                           | Kcmf1   | 2842 | 5  | 5  | 5  | 18.6 | 18.6 | 18.6 | 41.791  | 0.0000 | 172.81  | 9020500   | 97   | 14.74 | 15.29 | 14.62 | 14.85 | 15.85 | 15.19 | 15.63 |
| 0.140 | -0.29 | 0.82 Q8QVPI | Epsin-1                                                     | Epn1    | 2854 | 7  | 7  | 7  | 16.5 | 16.5 | 16.5 | 60.211  | 0.0000 | 24.024  | 7229600   | 82   | 14.66 | 14.26 | 15.02 | 15.58 | 13.04 | 15.60 | 15.53 |
| 0.639 | -0.29 | 0.82 Q9Q104 | Unconventional myosin-Va                                    | Myo5a   | 4315 | 70 | 70 | 67 | 44.3 | 44.3 | 44.3 | 215.54  | 0.0000 | 32.331  | 128900000 | 1263 | 16.96 | 16.56 | 16.79 | 16.93 | 16.68 | 17.40 | 17.21 |
| 0.534 | -0.29 | 0.82 Q9HW27 | Sodium/potassium-transporting ATPase subunit alpha-4        | Atp1a4  | 5729 | 14 | 11 | 11 | 11.9 | 11.5 | 11.4 | 114.89  | 0.0004 | 46.824  | 8896200   | 51   | 15.78 | 15.52 | 15.33 | 16.38 | 15.69 | 15.57 | 15.68 |
| 1.574 | -0.29 | 0.82 Q8K207 | Procollagen galactosyltransferase 1                         | Cgalgt1 | 3651 | 17 | 17 | 17 | 32.1 | 32.1 | 32.1 | 71.08   | 0.0000 | 63.064  | 56244000  | 251  | 17.84 | 17.79 | 17.78 | 18.15 | 18.25 | 18.01 | 17.93 |
| 1.569 | -0.29 | 0.82 Q9Q2A5 | Retinoid-inducible serine carboxypeptidase                  | Scpep1  | 4206 | 20 | 20 | 20 | 30.5 | 30.5 | 30.5 | 50.964  | 0.0000 | 217.27  | 17747000  | 509  | 17.82 | 18.06 | 18.01 | 18.15 | 18.41 | 18.28 | 18.16 |
| 0.215 | -0.29 | 0.82 Q91YE7 | RNA-binding protein 5                                       | Rbm5    | 4156 | 11 | 11 | 10 | 20.6 | 20.6 | 19.3 | 92.31   | 0.0000 | 67.676  | 6482500   | 102  | 14.01 | 14.50 | 14.47 | 15.33 | 13.35 | 14.92 | 14.88 |
| 0.789 | -0.29 | 0.82 Q8S579 | Emerin                                                      | Emd     | 274  | 8  | 8  | 8  | 45.9 | 45.9 | 45.9 | 29.435  | 0.0000 | 147.67  | 48716000  | 319  | 17.31 | 17.23 | 17.11 | 17.71 | 17.11 | 17.74 | 17.46 |
| 0.611 | -0.29 | 0.82 Q8QK21 | Secretory carrier-associated membrane protein 1             | Scamp1  | 3556 | 10 | 10 | 10 | 36.4 | 36.4 | 36.4 | 38.028  | 0.0000 | 323.31  | 28914000  | 319  | 16.52 | 16.15 | 16.51 | 16.14 | 16.71 | 16.44 | 16.44 |
| 0.663 | -0.29 | 0.82 P09405 | Nucleolin                                                   | Ncl     | 695  | 36 | 36 | 36 | 42.1 | 42.1 | 42.1 | 76.722  | 0.0000 | 323.31  | 10869000  | 702  | 16.80 | 17.45 | 17.47 | 17.73 | 17.44 | 17.38 | 17.57 |
| 0.966 | -0.29 | 0.82 Q8BH95 | Enoyl-CoA hydratase, mitochondrial                          | Echs1   | 3024 | 18 | 18 | 18 | 62.4 | 62.4 | 62.4 | 31.474  | 0.0000 | 323.31  | 209100000 | 806  | 18.81 | 18.26 | 18.36 | 18.33 | 18.50 | 18.46 | 18.46 |
| 0.770 | -0.29 | 0.82 P56382 | ATP synthase subunit epsilon, mitochondrial                 | Atp5e   | 1283 | 8  | 8  | 8  | 78.8 | 78.8 | 78.8 | 5.8378  | 0.0000 | 12.971  | 41423000  | 183  | 17.54 | 17.45 | 17.62 | 17.87 | 17.97 | 18.07 | 17.40 |
| 0.313 | -0.29 | 0.82 Q8PFF9 | Nuclear pore complex protein Nup98-Nup96                    | Nup98   | 2627 | 44 | 44 | 44 | 32.8 | 32.8 | 32.8 | 197.24  | 0.0000 | 323.31  | 121540000 | 795  | 16.96 | 17.17 | 17.20 | 16.94 | 17.68 | 17.41 | 17.50 |
| 0.495 | -0.29 | 0.82 A2AB59 | Rho GTPase-activating protein 27                            | Ahrap27 | 417  | 7  | 7  | 7  | 21.2 | 21.2 | 21.2 | 97.407  | 0.0000 | 70.654  | 9977300   | 77   | 14.94 | 14.57 | 15.18 | 15.73 | 15.01 | 15.98 | 14.90 |
| 0.932 | -0.29 | 0.82 Q4VC33 | Macrophage erythroblast attachor                            | Amae    | 2073 | 15 | 15 | 15 | 45.5 | 45.5 | 45.5 | 45.336  | 0.0000 | 88.476  | 22347000  | 211  | 15.50 | 15.09 | 15.38 | 15.59 | 15.84 | 15.37 | 15.65 |
| 0.372 | -0.29 | 0.82 P0C6B7 | Immunoglobulin superfamily member 6                         | Igfb8   | 706  | 7  | 7  | 7  | 24.1 | 24.1 | 24.1 | 26.354  | 0.0000 | 80.882  | 21114000  | 154  | 15.85 | 15.63 | 16.17 | 16.62 | 15.66 | 15.52 | 15.99 |
| 2.145 | -0.29 | 0.82 Q9PQ02 | GEM-interacting protein                                     | Gimp    | 2636 | 34 | 34 | 34 | 40.2 | 40.2 | 40.2 | 54.402  | 0.0000 | 266.87  | 82442000  | 797  | 16.64 | 16.43 | 16.64 | 16.85 | 16.44 | 16.89 | 16.81 |
| 0.613 | -0.29 | 0.82 Q9Q892 | Inosine triphosphate pyrophosphatase                        | Itpa    | 505  | 10 | 10 | 10 | 59.6 | 59.6 | 59.6 | 21.897  | 0.0000 | 95.851  | 99765000  | 110  | 19.74 | 19.20 | 19.48 | 18.70 | 20.40 | 19.53 | 19.36 |
| 0.271 | -0.29 | 0.82 Q8ER73 | Elongator complex protein 4                                 | Itpa    | 5297 | 3  | 3  | 3  | 10.2 | 10.2 | 10.2 | 46.325  | 0.0000 | 57.774  | 4394400   | 83   | 15.01 | 14.46 | 13.30 | 14.80 | 14.30 | 14.67 | 14.43 |
| 0.870 | -0.30 | 0.82 Q88630 | Golgi SNAP receptor complex member 1                        | Gosr1   | 5252 | 12 | 12 | 12 | 60.4 | 60.4 | 60.4 | 28.489  | 0.0000 | 109.953 | 20589000  | 175  | 16.40 | 16.40 | 16.63 | 16.43 | 16.72 | 17.01 | 16.92 |
| 0.786 | -0.30 | 0.81 Q9DB12 | Gasdermin-D                                                 | Gsdmcd1 | 5072 | 22 | 22 | 22 | 53.8 | 53.8 | 53.8 | 53.237  | 0.0000 | 321.69  | 113060000 | 548  | 17.91 | 18.23 | 17.77 | 18.41 | 18.52 | 18.09 | 18.06 |
| 0.334 | -0.30 | 0.81 Q9QWV3 | Tropo-3 and F-actin-binding protein                         | Trop3   | 809  | 5  | 5  | 4  | 4.4  | 3.9  | 3.9  | 25.4307 | 0.0000 | 32.31   | 2543000   | 32   | 13.47 | 12.45 | 12.78 | 13.47 | 12.93 | 12.78 | 12.92 |
| 0.194 | -0.30 | 0.81 P16332 | Methylmalonyl-CoA mutase, mitochondrial                     | Mut     | 809  | 20 | 20 | 20 | 47.2 | 47.2 | 47.2 | 82.843  | 0.0000 | 32.31   | 18262000  | 320  | 15.37 | 15.26 | 15.38 | 15.53 | 15.97 | 15.28 | 15.75 |
| 0.740 | -0.30 | 0.81 Q3U258 | Voltage-gated hydrogen channel 1                            | Hvcm1   | 1913 | 8  | 8  | 8  | 34.6 | 34.6 | 34.6 | 31.242  | 0.0000 | 100.33  | 9528400   | 74   | 15.88 | 15.23 | 15.65 | 15.91 | 15.48 | 16.08 | 15.65 |
| 0.134 | -0.30 | 0.81 Q9QWU7 | Kinesin-like protein KIF13A                                 | Kif13a  | 5290 | 5  | 5  | 5  | 3.3  | 3.3  | 3.3  | 195.81  | 0.0000 | 23.227  | 5179000   | 65   | 13.53 | 15.26 | 15.37 | 15.40 | 13.37 | 16.15 | 15.55 |
| 0.699 | -0.30 | 0.81 Q3U0V1 | Optic tectum element-binding protein 2                      | Ohp2    | 169  | 37 | 37 | 34 | 51.2 | 51.2 | 51.2 | 76.775  | 0.0000 | 323.31  | 22373000  | 1145 | 17.65 | 15.95 | 16.08 | 16.74 | 16.03 | 16.71 | 16.44 |
| 0.253 | -0.30 | 0.81 Q9R207 | Nibin                                                       | Nbn     | 5668 | 4  | 4  | 4  | 6.7  | 6.7  | 6.7  | 83.794  | 0.0000 | 22.445  | 4989200   | 67   | 14.83 | 15.01 | 14.80 | 13.99 | 15.56 | 15.45 | 15.71 |
| 1.145 | -0.30 | 0.81 Q9N9B9 | Splicing factor 3B subunit 1                                | Sf3b1   | 4497 | 49 | 49 | 49 | 42.1 | 42.1 | 42.1 | 145.81  | 0.0000 | 323.31  | 62711000  | 588  | 16.23 | 15.76 | 16.03 | 16.24 | 16.34 | 16.23 | 16.23 |
| 0.147 | -0.30 | 0.81 Q8BUR4 | Dedicator of cytokinesis protein 1                          | Dock1   | 3229 | 22 | 21 | 20 | 15.1 | 14.6 | 14.6 | 215.08  | 0.0000 | 42.03   | 12822000  | 128  | 15.08 | 14.39 | 14.93 | 14.73 | 16.88 | 14.90 | 13.89 |
| 0.819 | -0.30 | 0.81 Q59772 | 60S ribosomal protein L23, mitochondrial                    | Lp23b   | 417  | 7  | 7  | 7  | 47.9 | 47.9 | 47.9 | 17.121  | 0.0000 | 70.654  | 9977300   | 138  | 16.96 | 16.37 | 16.88 | 16.96 | 16.37 | 16.88 | 16.88 |
| 0.968 | -0.30 | 0.81 P60358 | 60 kDa heat shock protein, mitochondrial                    | Hspd1   | 962  | 71 | 71 | 71 | 90.2 | 90.2 | 90.2 | 60.955  | 0.0000 | 323.31  | 174860000 | 4305 | 20.93 | 21.04 | 21.26 | 21.55 | 21.01 | 21.56 | 21.28 |
| 0.218 | -0.30 | 0.81 Q9U1J3 | Something about silencing protein 10                        | Utp3    | 5383 | 3  | 3  | 3  | 9.6  | 9.6  | 9.6  | 53.398  | 0.0000 | 8.6125  | 2569600   | 21   | 14.06 | 14.00 | 13.47 | 13.83 | 13.06 | 15.05 | 14.64 |
| 3.030 | -0.30 | 0.81 Q9Z2P9 | Putative oxidoreductase GLYR1                               | Glyr1   | 4266 | 13 | 13 | 13 | 31.5 | 31.5 | 31.5 | 59.715  | 0.0000 | 121.08  | 32777000  | 416  | 15.76 | 15.65 | 15.69 | 15.92 | 16.00 | 16.03 | 16.05 |
| 0.990 | -0.30 | 0.81 P19258 | Protein Mpv17                                               | Mpv17   | 845  | 6  | 6  | 6  | 34.7 | 34.7 | 34.7 | 19.686  | 0.0000 | 153.21  | 14984000  | 131  | 15.30 | 14.70 | 15.09 | 15.39 | 15.30 | 15.28 | 15.34 |
| 1.713 | -0.30 | 0.81 Q9C309 | Inosine triphosphatase                                      | Itpa    | 505  | 6  | 6  | 6  | 22.9 | 22.9 | 22.9 | 49.970  | 0.0000 | 104.2   | 10712000  | 134  | 15.20 | 14.98 | 15.18 | 15.43 | 15.51 | 15.43 | 15.35 |
| 0.422 | -0.30 | 0.81 E9Q5K9 | YTH domain-containing protein 1                             | Ythdc1  | 329  | 9  | 9  | 9  | 12.4 | 12.4 | 12.4 | 85.846  | 0.0000 | 22.561  | 10081000  | 91   | 14.30 | 14.32 | 14.48 | 14.45 | 14.37 | 15.46 | 14.41 |
| 0.562 | -0.30 | 0.81 Q8BYH7 | TBC1 domain family member 17                                | Tbcd17  | 3298 | 9  | 9  | 9  | 21.9 | 21.9 | 21.9 | 72.859  | 0.0000 | 19.553  | 9428900   | 81   | 15.43 | 14.67 | 14.94 | 15.62 | 15.31 | 15.38 | 14.98 |
| 0.305 | -0.31 | 0.81 Q7TS11 | Pleckstrin homology domain-containing family M member 1     | Pleckm1 | 618  | 5  | 5  | 5  | 6.8  | 6.8  | 6.8  | 118.53  | 0.0000 | 20.721  | 4494200   | 66   | 13.50 | 12.88 | 13.55 | 14.42 | 12.90 | 13.44 | 13.72 |
| 1.719 | -0.31 | 0.81 P70161 | Importin subunit beta-1                                     | Impb1   | 1521 | 40 | 40 | 40 | 51.1 | 51.1 | 51.1 | 97.183  | 0.0000 | 32.31   | 30279000  | 1008 | 18.95 | 18.62 | 18.95 | 18.15 | 19.40 | 18.98 | 19.22 |
| 0.590 | -0.31 | 0.81 Q4KYV0 | Cell differentiation protein RCD1 homolog                   | Rcdp1   | 5464 | 6  | 6  | 6  | 26.8 | 26.8 | 26.8 | 33.601  | 0.0000 | 72.456  | 11415000  | 141  | 15.68 | 15.21 | 15.21 | 15.68 | 15.19 | 15.89 | 15.94 |
| 0.969 | -0.31 | 0.81 Q9ERA6 | Tufelin-interacting protein 11                              | Tfp11   | 5301 | 17 | 17 | 17 | 22.4 | 22.4 | 22.4 | 96.304  | 0.0000 | 124.82  | 15212000  | 181  | 15.12 | 15.06 | 15.26 | 15.26 | 15.79 | 15.26 | 15.49 |
| 0.281 | -0.31 | 0.81 Q8C5K5 | Uncharacterized protein CXorf38 homolog                     | Cxorf38 | 336  | 3  | 3  | 3  | 17.2 | 17.2 | 17.2 | 36.588  | 0.0000 | 22.827  | 1254300   | 34   | 13.60 | 13.27 | 13.52 | 12.78 | 13.76 | 14.71 | 13.81 |
| 1.062 | -0.31 | 0.81 Q8BRN8 | Coiled-coil and C2 domain-containing protein 1B             | C2cbrb  | 3183 | 22 | 22 | 22 | 41.3 | 41.3 | 41.3 | 93.93   | 0.0000 | 163.67  | 28434000  | 288  | 16.81 | 15.67 | 15.55 | 16.9  |       |       |       |

|        |       |      |        |                                                                                      |          |      |    |    |    |      |      |      |        |        |          |           |       |       |       |       |       |       |       |       |
|--------|-------|------|--------|--------------------------------------------------------------------------------------|----------|------|----|----|----|------|------|------|--------|--------|----------|-----------|-------|-------|-------|-------|-------|-------|-------|-------|
| 2.176  | -0.33 | 0.79 | Q62230 | Sialoadhesin                                                                         | Siglec1  | 2370 | 38 | 38 | 38 | 28.6 | 28.6 | 28.6 | 182.98 | 0.0000 | 228.34   | 75068000  | 456   | 15.91 | 15.79 | 15.81 | 16.29 | 16.19 | 16.17 | 16.02 |
| 1.005  | -0.33 | 0.79 | P28740 | Kinesin-like protein KIF2A                                                           | Kif2a    | 960  | 19 | 19 | 18 | 30.6 | 30.6 | 29.4 | 79.755 | 0.0000 | 77.417   | 16098000  | 231   | 14.50 | 14.48 | 14.77 | 15.00 | 14.47 | 14.95 | 15.15 |
| 1.098  | -0.33 | 0.79 | P61082 | NEDD8-conjugating enzyme Ubc12                                                       | Ube2m    | 1369 | 12 | 12 | 11 | 55.7 | 55.7 | 54.1 | 20.9   | 0.0000 | 22.889   | 81727000  | 247   | 17.87 | 18.25 | 18.38 | 18.31 | 18.58 | 18.47 | 18.63 |
| 0.155  | -0.33 | 0.79 | Q8BG57 | Choline/ethanolaminephosphotransferase 1                                             | Cept1    | 2992 | 5  | 5  | 5  | 13.9 | 13.9 | 13.9 | 48.434 | 0.0000 | 22.71    | 15786000  | 64    | 14.69 | 16.39 | 14.87 | 16.67 | 14.92 | 16.59 | 14.43 |
| 2.046  | -0.33 | 0.79 | Q6216A | 5'-UTR-dependent RNA helicase DDX3X-putative ATP-dependent RNA helicase C1Pas1       | DDX3X    | 3719 | 20 | 20 | 20 | 78.9 | 78.9 | 78.9 | 37.9   | 0.0000 | 32.331   | 383690000 | 1356  | 19.21 | 18.80 | 19.37 | 19.28 | 19.37 | 19.35 | 19.05 |
| 0.365  | -0.33 | 0.79 | Q8BF08 | Parkinson disease 7 domain-containing protein 1                                      | Pddc1    | 2943 | 5  | 5  | 5  | 33.9 | 33.9 | 37.3 | 23.277 | 0.0000 | 168.96   | 14655000  | 114   | 15.75 | 15.06 | 15.35 | 16.00 | 15.30 | 15.54 | 15.44 |
| 1.072  | -0.33 | 0.79 | Q6PDL0 | Cytoplasmic dynein 1 light intermediate chain 2                                      | Dync1li2 | 2616 | 16 | 15 | 15 | 50.8 | 48.2 | 48.2 | 54.218 | 0.0000 | 190.58   | 37032000  | 289   | 16.16 | 16.31 | 16.72 | 16.68 | 16.00 | 16.72 | 16.63 |
| 0.398  | -0.33 | 0.79 | Q912V0 | Melanoma inhibitory activity protein 2                                               | Mia2     | 4201 | 14 | 14 | 14 | 12   | 12   | 12   | 156.46 | 0.0000 | 69.504   | 16240000  | 90    | 15.17 | 15.16 | 15.84 | 15.01 | 16.00 | 16.21 | 15.67 |
| 0.396  | -0.34 | 0.79 | Q81739 | Integrin alpha-6, Integrin alpha-6 heavy chain, integrin alpha-6 light chain         | Iiga6    | 2330 | 9  | 9  | 9  | 12   | 12   | 12   | 122.16 | 0.0000 | 20.508   | 13071000  | 100   | 16.17 | 15.72 | 15.16 | 16.51 | 15.91 | 16.24 | 15.43 |
| 0.194  | -0.34 | 0.79 | Q8BM54 | Ubiquone biosynthesis C-methyltransferase, mitochondrial                             | Cmg3     | 3149 | 4  | 4  | 4  | 15.4 | 15.4 | 15.4 | 40.956 | 0.0000 | 14.899   | 3356000   | 27    | 14.42 | 14.62 | 14.68 | 14.51 | 14.62 | 14.38 | 14.50 |
| 0.896  | -0.34 | 0.79 | Q8B622 | Poly(ADP-ribose) glycohydrolase                                                      | Parg     | 5    | 5  | 5  | 5  | 6.1  | 6.1  | 6.1  | 109.32 | 0.0000 | 10.679   | 2371600   | 30    | 13.73 | 13.62 | 13.50 | 13.76 | 14.30 | 14.09 | 13.66 |
| 0.530  | -0.34 | 0.79 | Q9JHW4 | Selenocysteine-specific elongation factor                                            | Efsecf   | 2177 | 11 | 11 | 11 | 31.4 | 31.4 | 31.4 | 63.538 | 0.0000 | 95.786   | 17864000  | 154   | 15.85 | 16.00 | 15.90 | 16.53 | 16.55 | 15.54 | 16.41 |
| 0.558  | -0.34 | 0.79 | Q8Q664 | Lymphoid-restricted membrane protein, Processed lymphoid-restricted m-Lmp            | Lmp      | 5390 | 9  | 9  | 9  | 27.1 | 27.1 | 27.1 | 59.587 | 0.0000 | 79.398   | 147010000 | 86    | 21.10 | 20.18 | 20.27 | 20.77 | 20.67 | 20.81 | 21.17 |
| 2.292  | -0.34 | 0.79 | Q64376 | Peptidyl-prolyl cis-trans isomerase FKBP5, Peptidyl-prolyl cis-trans isomerase FKBP5 | Isbp5    | 2439 | 10 | 10 | 10 | 42.1 | 42.1 | 42.1 | 50.965 | 0.0000 | 23.362   | 16238000  | 141   | 15.60 | 15.55 | 15.92 | 15.76 | 15.92 | 15.89 | 15.92 |
| 0.466  | -0.34 | 0.79 | Q8Q122 | Transducin-like enhancer protein 3                                                   | Tie3     | 1761 | 8  | 8  | 4  | 15.7 | 15.7 | 9.8  | 83.446 | 0.0000 | 21.187   | 20540000  | 58    | 17.70 | 16.50 | 17.57 | 17.57 | 17.66 | 17.67 | 17.48 |
| 0.248  | -0.34 | 0.79 | Q8Q2M6 | CD97 antigen                                                                         | Cd97     | 5777 | 2  | 2  | 2  | 4.2  | 4.2  | 4.2  | 90.412 | 0.0000 | 8.3445   | 575620    | 25    | 13.82 | 12.69 | 12.85 | 13.15 | 14.33 | 12.53 | 13.83 |
| 2.580  | -0.34 | 0.79 | Q9ERN0 | Secretory carrier-associated membrane protein 2                                      | Scamp2   | 5315 | 6  | 6  | 6  | 18.8 | 18.8 | 18.8 | 36.464 | 0.0000 | 196.41   | 33388000  | 140   | 17.47 | 17.37 | 17.25 | 17.64 | 17.67 | 17.76 | 17.73 |
| 1.331  | -0.34 | 0.79 | P82245 | 40S ribosomal protein S15a                                                           | Rps15a   | 1409 | 15 | 15 | 15 | 82.3 | 82.3 | 82.3 | 14.839 | 0.0000 | 111.44   | 177940000 | 599   | 18.91 | 18.66 | 18.78 | 19.36 | 18.90 | 19.08 | 19.16 |
| 0.300  | -0.34 | 0.79 | P08074 | Carbonyl reductase [NADPH] 2                                                         | Cbr2     | 677  | 11 | 11 | 11 | 62.7 | 62.7 | 62.7 | 25.958 | 0.0000 | 164.27   | 6434200   | 68    | 12.73 | 12.37 | 12.16 | 11.74 | 13.38 | 13.29 | 12.63 |
| 0.915  | -0.34 | 0.79 | Q8C2K5 | RAS protein activator like-3                                                         | Rasa3    | 3372 | 13 | 13 | 13 | 18.9 | 18.9 | 18.9 | 114.78 | 0.0000 | 45.547   | 15579000  | 143   | 15.09 | 14.84 | 15.49 | 15.72 | 15.46 | 15.57 | 15.76 |
| 0.263  | -0.34 | 0.79 | Q8BVU5 | ADP-ribose pyrophosphatase, mitochondrial                                            | Nudt9    | 3248 | 6  | 6  | 6  | 18.9 | 18.9 | 18.9 | 38.604 | 0.0000 | 6.2519   | 1533500   | 20    | 12.75 | 13.28 | 13.23 | 12.72 | 13.67 | 12.78 | 14.53 |
| 1.252  | -0.34 | 0.79 | P24452 | Macrophage-capping protein                                                           | Capg     | 897  | 24 | 24 | 24 | 52.6 | 52.6 | 52.6 | 38.24  | 0.0000 | 23.316   | 287290000 | 2006  | 21.88 | 22.32 | 22.26 | 22.62 | 22.35 | 22.49 | 22.56 |
| 0.384  | -0.34 | 0.79 | Q8VEH3 | ADP-ribosylation factor-like protein 8A                                              | Arf8a    | 4005 | 9  | 4  | 4  | 53.2 | 25.8 | 25.8 | 21.39  | 0.0000 | 32.311   | 49023000  | 122   | 18.38 | 18.15 | 18.01 | 19.13 | 17.66 | 16.78 | 18.52 |
| 0.189  | -0.34 | 0.79 | Q8C2B3 | 39S ribosomal protein L55, mitochondrial                                             | Mrl55    | 4821 | 8  | 8  | 8  | 43.3 | 43.3 | 43.3 | 15.121 | 0.0000 | 23.497   | 12714000  | 78    | 15.01 | 16.09 | 16.47 | 16.59 | 14.74 | 16.40 | 17.06 |
| 0.397  | -0.34 | 0.79 | Q64705 | Upstream stimulatory factor 2                                                        | Usf2     | 2460 | 3  | 3  | 3  | 12.4 | 12.4 | 12.4 | 133.54 | 0.0002 | 5.8719   | 1434900   | 14    | 12.60 | 13.29 | 13.13 | 13.23 | 12.84 | 13.19 | 14.13 |
| 1.527  | -0.34 | 0.79 | Q8ES52 | Phosphatidylinositol 3,4,5-trisphosphate 5-phosphatase 1                             | Inpp5d   | 5238 | 8  | 8  | 8  | 56.5 | 56.5 | 56.5 | 67.083 | 0.0000 | 32.331   | 218900000 | 1316  | 17.76 | 17.65 | 17.66 | 17.75 | 17.34 | 18.05 | 18.14 |
| 1.097  | -0.34 | 0.79 | Q9JMH6 | Thioredoxin reductase 1, cytoplasmic                                                 | Trr      | 5511 | 49 | 49 | 47 | 65.9 | 65.9 | 65.9 | 87.083 | 0.0000 | 32.331   | 469310000 | 1088  | 14.51 | 18.88 | 19.67 | 18.88 | 19.67 | 19.67 | 20.19 |
| 0.756  | -0.34 | 0.79 | P21550 | Beta-enolase                                                                         | Eno3     | 866  | 13 | 7  | 7  | 22.2 | 23.7 | 23.7 | 47.024 | 0.0000 | 12.572   | 6195000   | 71    | 14.83 | 14.61 | 15.29 | 15.00 | 15.54 | 15.16 | 15.32 |
| 1.426  | -0.34 | 0.79 | Q70370 | Cathepsin S                                                                          | Cts      | 491  | 21 | 21 | 21 | 49.4 | 59.4 | 59.4 | 38.474 | 0.0000 | 32.331   | 58433000  | 865   | 20.16 | 20.33 | 20.39 | 20.49 | 20.81 | 20.48 | 20.77 |
| 1.377  | -0.34 | 0.79 | Q9ZM47 | Mannose-6-phosphate isomerase                                                        | Mpi      | 4297 | 8  | 8  | 8  | 33.1 | 33.1 | 33.1 | 46.575 | 0.0000 | 51.349   | 11058000  | 80    | 15.98 | 15.31 | 16.38 | 16.35 | 15.52 | 16.40 | 16.67 |
| 0.989  | -0.34 | 0.79 | P61327 | Protein mago nashi homolog 2                                                         | Mago     | 138  | 24 | 24 | 24 | 66.4 | 66.4 | 66.4 | 17.153 | 0.0000 | 69.555   | 52310000  | 46    | 17.11 | 17.16 | 17.37 | 17.27 | 17.16 | 17.42 | 17.35 |
| 0.955  | -0.34 | 0.79 | Q6ZWN5 | 40S ribosomal protein S9                                                             | Rps9     | 2703 | 25 | 25 | 25 | 66.5 | 66.5 | 66.5 | 22.591 | 0.0000 | 110.19   | 384080000 | 854   | 19.19 | 19.20 | 19.22 | 19.43 | 19.44 | 19.56 | 19.75 |
| 0.262  | -0.34 | 0.79 | Q69Z02 | Pre-mRNA-splicing factor ISY1 homolog                                                | Isp1     | 2489 | 3  | 3  | 3  | 9.8  | 9.8  | 9.8  | 32.989 | 0.0000 | 32.098   | 5195500   | 104   | 14.20 | 14.43 | 15.10 | 15.88 | 13.89 | 14.96 | 14.95 |
| 1.937  | -0.34 | 0.79 | Q55128 | Histone deacetylase complex subunit SAP18                                            | Sap18    | 457  | 7  | 7  | 7  | 52.9 | 52.9 | 52.9 | 17.595 | 0.0000 | 77.541   | 17669000  | 139   | 15.70 | 15.74 | 16.01 | 16.18 | 16.20 | 16.18 | 16.08 |
| 0.7424 | -0.34 | 0.79 | Q55356 | 5S rRNA nucleolar RNA-associated protein 18 homolog                                  | Nap18    | 213  | 13 | 13 | 13 | 33.9 | 33.9 | 33.9 | 10.217 | 0.0000 | 102.82   | 144070000 | 15    | 15.24 | 15.86 | 15.78 | 15.72 | 16.36 | 14.38 | 15.65 |
| 1.125  | -0.34 | 0.79 | Q64704 | Syntaxin-3                                                                           | Stx3     | 2459 | 14 | 14 | 14 | 41.5 | 41.5 | 41.5 | 33.243 | 0.0000 | 236.06   | 26828000  | 191   | 16.17 | 15.96 | 16.34 | 16.65 | 16.31 | 16.71 | 16.34 |
| 1.340  | -0.34 | 0.79 | Q80TL7 | Protein MON2 homolog                                                                 | Mon2     | 2807 | 9  | 9  | 9  | 9    | 9    | 9    | 189.08 | 0.0000 | 58.786   | 9242400   | 83    | 15.27 | 14.83 | 14.99 | 15.28 | 15.43 | 15.52 | 15.27 |
| 0.986  | -0.34 | 0.79 | Q3UQ84 | Threonine--RNA ligase, mitochondrial                                                 | Tars2    | 2017 | 10 | 10 | 10 | 16.3 | 16.3 | 16.3 | 81.699 | 0.0000 | 14.635   | 7084000   | 60    | 14.47 | 14.41 | 14.77 | 14.63 | 14.75 | 14.99 | 15.19 |
| 0.581  | -0.34 | 0.79 | Q9XCE7 | Transmembrane em24 domain-containing protein 5                                       | Tmem5    | 17   | 4  | 4  | 4  | 17   | 17   | 17   | 22.737 | 0.0000 | 170.7600 | 170       | 16.82 | 16.42 | 16.47 | 16.82 | 16.42 | 16.47 | 16.82 |       |
| 1.599  | -0.35 | 0.79 | Q9CFC0 | U4U16 small nuclear ribonucleoprotein Pp31                                           | Pp31     | 3417 | 19 | 19 | 19 | 41.7 | 41.7 | 41.7 | 55.429 | 0.0000 | 137.87   | 35066000  | 398   | 15.82 | 15.99 | 16.08 | 16.22 | 16.16 | 16.32 | 16.51 |
| 0.718  | -0.35 | 0.79 | Q9ECQ5 | N-terminal kinase-like protein                                                       | Scyl1    | 5275 | 19 | 19 | 19 | 34.9 | 34.9 | 34.9 | 89.159 | 0.0000 | 88.18    | 45884000  | 213   | 17.14 | 16.98 | 17.09 | 17.61 | 16.90 | 17.38 | 17.77 |
| 0.643  | -0.35 | 0.79 | Q6A068 | Cell division cycle 5-like protein                                                   | Cdc5l    | 2498 | 36 | 36 | 36 | 53.6 | 53.6 | 53.6 | 92.188 | 0.0000 | 255.25   | 58895000  | 519   | 15.89 | 16.59 | 16.68 | 16.42 | 16.70 | 16.82 | 16.99 |
| 1.156  | -0.35 | 0.79 | Q8ZD04 | Heterogeneous nuclear ribonucleoproteins C1/C2                                       | Hnmpc    | 5828 | 25 | 25 | 25 | 58.5 | 58.5 | 58.5 | 34.384 | 0.0000 | 131.49   | 164770000 | 512   | 18.49 | 18.63 | 18.60 | 18.65 | 18.76 | 19.12 | 19.14 |
| 1.235  | -0.35 | 0.79 | Q8BU14 | Transducin protein SEC2                                                              | Sec2     | 3211 | 7  | 7  | 7  | 15.6 | 15.6 | 15.6 | 45.58  | 0.0000 | 32.331   | 25954000  | 163   | 17.08 | 16.88 | 16.53 | 16.88 | 16.88 | 16.88 | 16.88 |
| 0.802  | -0.35 | 0.79 | Q8YVY2 | Nuclear-interacting partner of ALK                                                   | Zc3hc1   | 2607 | 6  | 6  | 6  | 17.6 | 17.6 | 17.6 | 55.196 | 0.0000 | 14.903   | 6480000   | 74    | 14.87 | 14.37 | 14.94 | 15.25 | 15.18 | 15.15 | 14.71 |
| 1.416  | -0.35 | 0.79 | P97808 | FXD3 domain-containing ion transport regulator 5                                     | Fxyd5    | 1674 | 5  | 5  | 5  | 38.2 | 38.2 | 38.2 | 19.454 | 0.0000 | 120.22   | 7369000   | 111   | 14.73 | 14.42 | 14.61 | 15.07 | 15.08 | 14.77 | 14.81 |
| 0.547  | -0.35 | 0.79 | Q71FD5 | E3 ubiquitin-protein ligase ZNRF2                                                    | Znrf2    | 2714 | 4  | 4  | 4  | 42.9 | 42.9 | 42.9 | 23.705 | 0.0000 | 45.245   | 6478700   | 87    | 14.25 | 14.55 | 14.86 | 15.53 | 14.67 | 14.65 | 14.75 |
| 0.250  | -0.35 | 0.79 | Q8B555 | Sn3 histone deacetylase corepressor complex component SDS3                           | Sds3     | 3175 | 12 | 12 | 12 | 12.2 | 12.2 | 12.2 | 38.107 | 0.0000 | 20.67    | 1448200   | 46    | 13.33 | 12.55 | 12.38 | 14.62 | 12.80 | 12.69 | 13.65 |
| 0.476  | -0.35 | 0.79 | Q9JURC | Transmembrane protein 9B, Transmembrane protein 9                                    | Tmem9b   | 5433 | 4  | 4  | 4  | 25.6 | 25.6 | 25.6 | 22.607 | 0.0000 | 32.687   | 4583200   | 58    | 13.94 | 14.54 | 13.94 | 15.15 | 14.09 | 14.49 | 14.22 |
| 1.174  | -0.35 | 0.79 | Q9QYE6 | Golgin subfamily A member 5                                                          | Golga5   | 5570 | 34 | 34 | 34 | 56.5 | 56.5 | 56.5 | 82.367 | 0.0000 | 258.6    | 42744000  | 488   | 15.85 | 15.64 | 15.86 | 16.10 | 15.82 | 16.26 | 16.34 |
| 0.311  | -0.35 | 0.79 | Q9Q1J3 | SAP domain-containing ribonucleoprotein                                              | Sarp     | 2921 | 13 | 13 | 13 | 51.4 | 51.4 | 51.4 | 23.532 | 0.0000 | 266.03   | 67058000  | 429   | 15.98 |       |       |       |       |       |       |

|       |       |                 |                                                                                  |                 |       |     |    |    |      |      |        |        |          |           |            |       |       |       |       |       |       |       |       |
|-------|-------|-----------------|----------------------------------------------------------------------------------|-----------------|-------|-----|----|----|------|------|--------|--------|----------|-----------|------------|-------|-------|-------|-------|-------|-------|-------|-------|
| 0.921 | -0.37 | 0.77 Q8C2K1     | Differentially expressed in FDCP 6                                               | Duf6            | 3371  | 22  | 22 | 22 | 33.7 | 33.7 | 33.7   | 73.453 | 0.0000   | 48.214    | 18645000   | 204   | 14.73 | 14.46 | 14.66 | 14.58 | 15.32 | 15.12 | 14.94 |
| 0.580 | -0.37 | 0.77 D3YXK2     | Scaffold attachment factor B1                                                    | Salb            | 210   | 22  | 22 | 18 | 28.4 | 28.4 | 21.1   | 105.1  | 0.0000   | 262.51    | 21204000   | 249   | 14.19 | 14.85 | 15.16 | 15.12 | 14.69 | 15.29 | 15.34 |
| 1.155 | -0.37 | 0.77 Q92208     | Leucine-rich repeat-containing protein 59                                        | Lrc59           | 4271  | 17  | 17 | 17 | 48.9 | 48.9 | 48.9   | 34.877 | 0.0000   | 194.61    | 294440000  | 621   | 18.71 | 18.71 | 18.81 | 19.15 | 19.03 | 19.47 | 18.81 |
| 2.044 | -0.37 | 0.77 Q8BUK6     | Protein Hook homolog 3                                                           | Hook3           | 3226  | 21  | 21 | 21 | 3.9  | 3.9  | 3.9    | 83.217 | 0.0000   | 125.38    | 132230000  | 253   | 19.98 | 20.04 | 20.22 | 20.60 | 20.33 | 20.47 | 20.41 |
| 1.290 | -0.37 | 0.77 T2B692     | E3 ubiquitin-protein ligase CBL                                                  | Cbl             | 870   | 15  | 13 | 15 | 22.3 | 22.3 | 100.56 | 0.0000 | 94.84    | 40440000  | 261        | 16.57 | 16.48 | 16.58 | 16.67 | 17.14 | 16.48 | 16.86 |       |
| 0.316 | -0.38 | 0.77 A2ASS6     | Titin                                                                            | Ttn             | 37    | 25  | 25 | 25 | 0.9  | 0.9  | 0.9    | 3906.4 | 0.0015   | 3.3944    | 109000000  | 136   | 16.93 | 17.96 | 18.28 | 17.95 | 17.31 | 18.48 | 18.67 |
| 0.281 | -0.38 | 0.77 P42232     | Signal transducer and activator of transcription 5B                              | Stat5b          | 1078  | 16  | 5  | 5  | 24.3 | 9.3  | 9.3    | 90.001 | 0.0000   | 11.998    | 6144900    | 72    | 14.27 | 14.13 | 14.30 | 13.34 | 15.04 | 14.56 | 15.49 |
| 0.772 | -0.38 | 0.77 Q06185     | ATP synthase subunit e, mitochondrial                                            | Atp5i           | 1750  | 7   | 7  | 7  | 67.6 | 67.6 | 67.6   | 8.2355 | 0.0000   | 28.136    | 71789000   | 159   | 18.34 | 18.08 | 18.39 | 19.05 | 18.16 | 18.78 | 18.80 |
| 0.167 | -0.38 | 0.77 Q9R269     | Periplakin                                                                       | Ppl             | 5672  | 12  | 12 | 12 | 7.3  | 7.3  | 7.3    | 204    | 0.0000   | 17.136    | 4428400    | 29    | 13.11 | 12.36 | 12.84 | 15.02 | 11.61 | 13.30 | 12.65 |
| 0.681 | -0.38 | 0.77 Q9NKG2     | E3 ubiquitin-protein ligase UBR2                                                 | Ubr2            | 2666  | 8   | 8  | 8  | 5.9  | 5.9  | 198.15 | 0.0000 | 94.84    | 7449300   | 74         | 14.81 | 14.81 | 14.73 | 15.03 | 15.46 | 15.57 | 14.91 |       |
| 1.175 | -0.38 | 0.77 P62192     | 26S protease regulatory subunit 4                                                | Psmc1           | 1406  | 35  | 35 | 35 | 71.6 | 71.6 | 4.94   | 0.0000 | 323.31   | 234470000 | 1095       | 17.87 | 17.87 | 18.10 | 18.43 | 17.98 | 18.49 | 18.53 |       |
| 0.623 | -0.38 | 0.77 Q5SV85     | Synergizer gamma                                                                 | Syng            | 2150  | 4   | 4  | 4  | 4.1  | 4.1  | 4.1    | 139.61 | 0.0000   | 6.8095    | 1579300    | 15    | 13.10 | 12.80 | 12.97 | 13.56 | 13.87 | 13.05 | 12.88 |
| 0.545 | -0.38 | 0.77 Q5JK36     | ADP-sugar pyrophosphatase                                                        | Nudt5           | 5463  | 7   | 7  | 7  | 36.2 | 36.2 | 36.2   | 23.984 | 0.0000   | 19.57     | 6453000    | 83    | 14.31 | 14.84 | 14.94 | 15.20 | 14.46 | 15.09 | 15.55 |
| 1.305 | -0.38 | 0.77 P14733     | Lamin B1                                                                         | Lmb1            | 785   | 79  | 77 | 70 | 83.2 | 83.2 | 75.9   | 66.785 | 0.0000   | 323.31    | 404700000  | 2053  | 17.76 | 18.09 | 17.94 | 18.55 | 18.11 | 18.17 | 18.41 |
| 1.020 | -0.38 | 0.77 Q9DC70     | NADH dehydrogenase [ubiquinone] iron-sulfur protein 7, mitochondrial             | Ndufs7          | 5200  | 8   | 8  | 8  | 34.8 | 34.8 | 34.8   | 24.683 | 0.0000   | 92.219    | 18104000   | 127   | 16.67 | 16.31 | 16.32 | 16.63 | 16.54 | 17.01 | 17.07 |
| 0.852 | -0.38 | 0.77 P48193     | Protein 4.1                                                                      | Epb41           | 1141  | 26  | 26 | 23 | 30.1 | 30.1 | 27.7   | 96.91  | 0.0000   | 66.011    | 27489000   | 223   | 15.59 | 15.12 | 15.06 | 16.05 | 15.43 | 15.55 | 15.52 |
| 0.957 | -0.38 | 0.77 P70315     | Wiskott-Aldrich syndrome protein homolog                                         | Was             | 1552  | 18  | 18 | 17 | 40   | 37.1 | 40     | 54.191 | 0.0000   | 323.31    | 42928000   | 242   | 17.31 | 17.35 | 17.09 | 17.92 | 17.87 | 17.40 | 17.32 |
| 1.672 | -0.38 | 0.77 Q96KR3     | Beta-lactamase-like protein 2                                                    | Lact2           | 4390  | 13  | 13 | 13 | 48.3 | 48.3 | 32.754 | 0.0000 | 45.509   | 41083000  | 311        | 16.67 | 16.65 | 16.97 | 17.29 | 17.36 | 17.23 | 17.62 |       |
| 0.634 | -0.38 | 0.77 P97344     | Myosin phosphatase Rho-interacting protein                                       | Mrip            | 1649  | 8   | 8  | 7  | 10.2 | 10.2 | 48.3   | 116.41 | 0.0000   | 12.553    | 4320500    | 46    | 13.47 | 14.13 | 14.30 | 13.94 | 14.68 | 14.31 | 14.45 |
| 1.306 | -0.38 | 0.77 Q9DS53     | ADP-ribosylation factor GTPase-activating protein 3                              | Arfgap3         | 5069  | 20  | 19 | 19 | 41.7 | 39.8 | 39.8   | 57.455 | 0.0000   | 114.39    | 39897000   | 291   | 15.82 | 15.79 | 16.03 | 16.06 | 16.08 | 16.41 | 16.50 |
| 0.354 | -0.38 | 0.77 Q99M08     | Uncharacterized protein C4orf3 homolog                                           | C4orf3          | 4452  | 2   | 2  | 2  | 24.6 | 24.6 | 24.6   | 74.043 | 0.0000   | 48.406    | 28387000   | 91    | 17.40 | 18.01 | 16.98 | 18.78 | 17.28 | 17.74 | 17.58 |
| 0.504 | -0.38 | 0.77 P22780     | Beta-galactosidase                                                               | Gbl             | 334   | 23  | 23 | 22 | 35.2 | 35.2 | 33.4   | 73.12  | 0.0000   | 204.24    | 63321000   | 399   | 16.68 | 16.25 | 15.94 | 16.73 | 16.00 | 16.86 | 17.16 |
| 0.705 | -0.38 | 0.77 Q9BHS3     | Pre-mRNA-splicing factor RBM22                                                   | Rbm22           | 3050  | 8   | 8  | 8  | 28.3 | 28.3 | 28.3   | 46.895 | 0.0000   | 24.332    | 8436200    | 82    | 14.84 | 15.38 | 15.33 | 15.60 | 16.04 | 15.47 | 15.17 |
| 0.983 | -0.38 | 0.77 Q9ER69     | Pre-mRNA-splicing regulator WTAP                                                 | Wtap            | 5295  | 4   | 4  | 4  | 15.2 | 15.2 | 15.2   | 44.176 | 0.0000   | 23.972    | 1873200    | 41    | 13.12 | 12.99 | 13.29 | 13.70 | 13.74 | 13.55 | 13.08 |
| 0.126 | -0.38 | 0.77 Q9CWN7     | CCR4-NOT transcription complex subunit 11                                        | Cnot11          | 4722  | 3   | 3  | 3  | 12.1 | 12.1 | 12.1   | 54.959 | 0.0025   | 2.9065    | 3035200    | 35    | 12.95 | 13.75 | 13.08 | 14.59 | 14.08 | 14.80 | 14.34 |
| 0.107 | -0.38 | 0.77 P11182     | Alpha-endolase                                                                   | Eno1            | 820   | 66  | 66 | 66 | 58   | 58   | 58     | 47.14  | 0.0000   | 97.978    | 870630000  | 9696  | 22.03 | 22.35 | 22.40 | 22.46 | 22.89 | 22.43 | 22.86 |
| 0.700 | -0.39 | 0.77 P44704     | Myelin basic protein                                                             | Mbp             | 6417  | 304 | 4  | 4  | 14.8 | 14.8 | 14.8   | 21.187 | 0.0000   | 11.048    | 3443500    | 45    | 13.76 | 13.69 | 13.68 | 14.54 | 13.79 | 14.02 | 14.02 |
| 3.023 | -0.39 | 0.77 Q9CRY7     | Glycerophosphodiester phosphodiesterase domain-containing protein 1              | Gdpd1           | 4695  | 9   | 9  | 9  | 27.1 | 27.1 | 27.1   | 35.866 | 0.0000   | 19.514    | 16941000   | 172   | 15.91 | 16.00 | 15.97 | 16.32 | 16.25 | 16.46 | 16.36 |
| 1.530 | -0.39 | 0.76 Q99J98     | SWI/SNF-related matrix-associated actin-dependent regulator of chromatin Smarcd2 | Smarcd2         | 4346  | 18  | 18 | 16 | 42.4 | 42.4 | 38.8   | 59.084 | 0.0000   | 99.723    | 34673000   | 252   | 15.91 | 15.99 | 16.09 | 16.39 | 16.67 | 16.25 | 16.23 |
| 0.949 | -0.39 | 0.76 P57759     | Endoplasmic reticulum resident protein 29                                        | Erp29           | 1298  | 21  | 21 | 21 | 63.7 | 63.7 | 63.7   | 28.823 | 0.0000   | 300.32    | 223410000  | 756   | 18.67 | 19.17 | 19.30 | 19.54 | 19.13 | 19.47 | 19.59 |
| 0.928 | -0.39 | 0.76 Q9ZU11     | Proteasome subunit alpha type-5                                                  | Psm5            | 5865  | 10  | 10 | 10 | 56.8 | 56.8 | 26.411 | 0.0000 | 44933000 | 218       | 17.73      | 17.73 | 17.14 | 18.11 | 17.92 | 17.82 | 17.74 | 17.73 |       |
| 2.029 | -0.39 | 0.76 Q9IWS0     | Cold shock domain-containing protein E1                                          | Csde1           | 10491 | 27  | 27 | 27 | 32.6 | 32.6 | 32.6   | 88.79  | 0.0000   | 15.154    | 59729000   | 504   | 16.15 | 16.30 | 16.50 | 16.59 | 16.71 | 16.76 | 16.75 |
| 0.428 | -0.39 | 0.76 Q08017.P70 | Nascent polypeptide-associated complex subunit alpha;Nascent polypepti           | Naca            | 1581  | 6   | 6  | 6  | 28.8 | 28.8 | 28.8   | 23.384 | 0.0000   | 160.29    | 20276000   | 133   | 15.95 | 16.85 | 16.63 | 17.36 | 17.16 | 16.10 | 16.84 |
| 2.494 | -0.39 | 0.76 P46460     | Vesicle-fusing ATPase                                                            | Nsf             | 1104  | 49  | 49 | 49 | 69.4 | 69.4 | 69.4   | 82.613 | 0.0000   | 323.31    | 19710000   | 984   | 17.85 | 17.74 | 17.94 | 18.13 | 18.19 | 18.26 | 18.35 |
| 0.488 | -0.39 | 0.76 Q8R171     | Secretory multivesicular body protein 7                                          | Scmp7           | 3798  | 8   | 8  | 8  | 25.7 | 25.7 | 25.7   | 6.8    | 0.0000   | 7.818     | 2037100    | 68    | 13.75 | 14.29 | 14.29 | 14.58 | 14.58 | 14.58 | 14.58 |
| 0.917 | -0.39 | 0.76 Q8R404     | Protein QIL1                                                                     | Qil1            | 3861  | 6   | 6  | 6  | 86.6 | 86.6 | 86.6   | 13.373 | 0.0000   | 225.69    | 29793000   | 210   | 16.88 | 17.01 | 16.60 | 16.92 | 17.02 | 17.34 | 17.60 |
| 0.728 | -0.39 | 0.76 Q9EQ20     | Methylmalonate-semialdehyde dehydrogenase [acylating], mitochondrial             | Aldh8a1         | 5269  | 15  | 15 | 15 | 37.6 | 37.6 | 37.6   | 57.915 | 0.0000   | 122.85    | 17484000   | 140   | 15.97 | 15.80 | 15.37 | 15.64 | 16.19 | 16.11 | 16.48 |
| 0.801 | -0.39 | 0.76 Q9D6R2     | Isocitrate dehydrogenase [NAD] subunit alpha, mitochondrial                      | Icdh3a          | 5007  | 21  | 21 | 21 | 51.6 | 51.6 | 51.6   | 39.638 | 0.0000   | 182.15    | 9083300    | 611   | 17.27 | 17.29 | 17.44 | 18.04 | 18.08 | 17.40 | 17.37 |
| 0.227 | -0.39 | 0.76 Q3ZJ02     | Ubiquitin                                                                        | Ubi             | 507   | 3   | 3  | 3  | 50.7 | 50.7 | 50.7   | 6.8    | 0.0000   | 7.818     | 2037100    | 68    | 13.75 | 14.29 | 14.29 | 14.58 | 14.58 | 14.58 | 14.58 |
| 0.652 | -0.39 | 0.76 Q9CR88     | Cytochrome b-c1 complex subunit Rieske, mitochondrial                            | Cytochrome b-c1 | 4677  | 11  | 11 | 11 | 53.6 | 53.6 | 53.6   | 29.367 | 0.0000   | 146.44    | 68774000   | 308   | 17.78 | 17.59 | 18.08 | 18.35 | 18.57 | 18.31 | 17.57 |
| 0.960 | -0.39 | 0.76 Q9JMH9     | Unconventional myosin XVIIIa                                                     | Myo18a          | 5512  | 51  | 51 | 51 | 30.8 | 30.8 | 30.8   | 232.75 | 0.0000   | 323.31    | 53586000   | 630   | 15.25 | 15.01 | 15.49 | 15.64 | 15.26 | 15.75 | 15.92 |
| 0.587 | -0.39 | 0.76 Q35691     | Pinn                                                                             | Pnn             | 399   | 24  | 24 | 24 | 26.5 | 26.5 | 26.5   | 82.435 | 0.0000   | 132.43    | 54371000   | 412   | 16.03 | 16.16 | 16.74 | 16.08 | 16.83 | 17.02 | 16.88 |
| 0.333 | -0.39 | 0.76 Q9J238     | Tetratricopeptide repeat protein 1                                               | Ttrc1           | 4185  | 2   | 2  | 2  | 9.6  | 9.6  | 9.6    | 33.263 | 0.0004   | 5.125     | 1562600    | 26    | 13.58 | 14.62 | 14.00 | 14.67 | 15.09 | 13.42 | 14.66 |
| 1.435 | -0.39 | 0.76 Q8BV13     | CYP epoxide hydrolase complex subunit 7b                                         | Cyp7b           | 323   | 4   | 4  | 4  | 28   | 28   | 28     | 29.687 | 0.0000   | 8.065     | 8056200    | 124   | 15.87 | 14.79 | 13.68 | 15.36 | 15.13 | 15.67 | 14.62 |
| 1.055 | -0.39 | 0.76 Q9WVA2     | Taglin-2                                                                         | Tagln2          | 5744  | 32  | 32 | 32 | 99.5 | 99.5 | 99.5   | 22.395 | 0.0000   | 323.31    | 1284400000 | 1747  | 21.02 | 21.10 | 21.10 | 21.94 | 21.27 | 21.42 | 21.30 |
| 0.958 | -0.39 | 0.76 Q9JLC5     | Electron transfer flavoprotein subunit alpha, mitochondrial                      | Elf1a           | 4417  | 31  | 31 | 31 | 79.6 | 79.6 | 79.6   | 35.009 | 0.0000   | 323.31    | 304080000  | 942   | 18.60 | 19.04 | 19.23 | 19.31 | 19.67 | 19.22 | 19.20 |
| 0.716 | -0.40 | 0.76 Q9JY11     | Glutaryl-RNA (Gln) amidotransferase subunit B, mitochondrial                     | GabB            | 4347  | 5   | 5  | 5  | 15.1 | 15.1 | 15.1   | 62.118 | 0.0000   | 17.455    | 10727000   | 64    | 16.08 | 16.23 | 16.44 | 16.36 | 17.26 | 16.55 | 16.41 |
| 0.252 | -0.40 | 0.76 Q3N9C2     | F-box only protein 50                                                            | Ncor1           | 259   | 2   | 2  | 2  | 6.8  | 6.8  | 6.8    | 30.407 | 0.0005   | 2.7587    | 3653100    | 45    | 14.27 | 13.53 | 14.98 | 16.02 | 16.17 | 14.20 | 15.04 |
| 0.329 | -0.40 | 0.76 Q6P9R1     | ATP-dependent RNA helicase DDX51                                                 | Ddx51           | 2591  | 5   | 5  | 5  | 12.8 | 12.8 | 12.8   | 70.367 | 0.0000   | 19.432    | 2904900    | 47    | 13.41 | 13.04 | 13.30 | 13.54 | 14.87 | 13.16 | 13.02 |
| 1.408 | -0.40 | 0.76 Q6Z261     | Spectrin beta chain, non-erythrocytic 1                                          | Sptbn1          | 2373  | 83  | 83 | 81 | 43   | 43   | 42.2   | 274.22 | 0.0000   | 323.31    | 131300000  | 1218  | 16.68 | 16.60 | 16.89 | 16.99 | 16.85 | 17.17 | 17.21 |
| 1.691 | -0.40 | 0.76 P08556     | GTPase NRas                                                                      | Nras            | 686   | 14  | 14 | 4  | 82   | 82   | 82     | 30.219 | 0.0000   | 140.53    | 33021000   | 246   | 17.16 | 16.96 | 16.82 | 17.31 | 17.57 | 17.47 | 17.41 |
| 0.915 | -0.40 | 0.76 Q6Q474     | Spermidine synthase                                                              | Sm              | 2457  | 14  | 14 | 14 | 62.3 | 62.3 | 62.3   | 33.955 | 0.0000   | 199.32    | 21959000   | 259   | 17.09 | 16.99 | 16.45 | 17.16 | 17.50 | 17.29 | 16.51 |
| 2.678 | -0.40 | 0.76 P6C098     | 40S ribosomal protein S3                                                         | Rps3            | 938   | 36  | 3  |    |      |      |        |        |          |           |            |       |       |       |       |       |       |       |       |

|       |       |      |         |                                                                    |           |      |    |    |    |      |      |      |        |        |         |          |           |       |       |       |       |       |       |       |       |
|-------|-------|------|---------|--------------------------------------------------------------------|-----------|------|----|----|----|------|------|------|--------|--------|---------|----------|-----------|-------|-------|-------|-------|-------|-------|-------|-------|
| 2.479 | -0.43 | 0.74 | Q9JLJ8  | Squamous cell carcinoma antigen recognized by T-cells 3            | Sart3     | 5481 | 24 | 24 | 23 | 32.1 | 32.1 | 32   | 109.62 | 0.0000 | 196.31  | 30081000 | 323       | 15.45 | 15.54 | 15.48 | 15.88 | 16.03 | 15.75 | 16.02 |       |
| 0.554 | -0.43 | 0.74 | Q64343  | ATP-binding cassette sub-family G member 1                         | Abcg1     | 2434 | 11 | 11 | 11 | 20.9 | 20.9 | 20.9 | 74.032 | 0.0000 | 75.184  | 7237100  | 65        | 13.87 | 13.60 | 13.71 | 14.75 | 14.58 | 13.59 | 13.72 |       |
| 1.274 | -0.43 | 0.74 | Q07113  | Cation-independent mannose 6-phosphate receptor                    | Igf2r     | 1755 | 17 | 17 | 17 | 8.3  | 8.3  | 8.3  | 273.81 | 0.0000 | 70.869  | 19213000 | 202       | 15.54 | 15.69 | 15.71 | 16.44 | 15.77 | 15.98 | 16.11 |       |
| 1.650 | -0.43 | 0.74 | Q70404  | Vesicle-associated membrane protein 8                              | Vamp8     | 4244 | 9  | 9  | 9  | 59.4 | 59.4 | 59.4 | 11.451 | 0.0000 | 120.87  | 11493000 | 272       | 17.94 | 17.68 | 17.79 | 18.49 | 18.21 | 18.24 | 18.00 |       |
| 2.179 | -0.43 | 0.74 | Q61749  | Protein initiation factor eIF-2B subunit delta                     | E2f2a     | 2334 | 17 | 17 | 17 | 42.6 | 42.6 | 42.6 | 57.624 | 0.0000 | 256.07  | 33532000 | 573       | 19.47 | 19.43 | 19.47 | 15.91 | 15.43 | 15.87 | 15.43 |       |
| 0.939 | -0.43 | 0.74 | Q60953  | Protein PML                                                        | Pml       | 2297 | 10 | 10 | 10 | 16.5 | 16.5 | 16.5 | 98.241 | 0.0000 | 57.576  | 3143600  | 35        | 12.73 | 12.74 | 13.26 | 14.16 | 13.17 | 13.06 | 13.03 |       |
| 1.353 | -0.43 | 0.74 | Q9R078  | Inhibitor of nuclear factor kappa-B kinase subunit epsilon         | Ikbke     | 5641 | 7  | 7  | 7  | 14.1 | 14.1 | 14.1 | 80.952 | 0.0000 | 39.318  | 3219100  | 29        | 13.43 | 13.01 | 13.37 | 13.45 | 13.67 | 13.93 | 13.77 |       |
| 0.969 | -0.43 | 0.74 | B2RXL14 | Terminal uridylyltransferase 4                                     | Zochr11   | 83   | 6  | 6  | 6  | 4.7  | 4.7  | 4.7  | 184.65 | 0.0000 | 25.522  | 3840200  | 61        | 14.00 | 13.57 | 14.14 | 14.63 | 13.96 | 14.48 | 14.29 |       |
| 1.274 | -0.43 | 0.74 | Q8B1Y3  | Exosome complex component MTR3                                     | Exosc6    | 3209 | 10 | 10 | 10 | 44   | 44   | 44   | 28.37  | 0.0000 | 159.82  | 1502000  | 132       | 15.05 | 16.44 | 16.16 | 16.49 | 16.90 | 16.43 | 16.96 |       |
| 2.311 | -0.44 | 0.74 | P84086  | Rho-related GTP-binding protein RhoG                               | Rhoq      | 1609 | 14 | 13 | 13 | 63.4 | 63.4 | 67.6 | 21.308 | 0.0000 | 256.07  | 33532000 | 573       | 19.47 | 19.43 | 19.47 | 15.91 | 15.43 | 15.87 | 15.43 |       |
| 0.876 | -0.44 | 0.74 | Q8K209  | Shoon-1                                                            | Klaa1598  | 3669 | 30 | 30 | 30 | 44.7 | 44.7 | 44.7 | 71.342 | 0.0000 | 115.59  | 37527000 | 308       | 15.76 | 16.53 | 16.35 | 17.00 | 16.43 | 16.60 | 16.55 |       |
| 0.927 | -0.44 | 0.74 | Q99L86  | Methionine adenosyltransferase 2 subunit beta                      | Mat2b     | 4414 | 12 | 12 | 12 | 44   | 44   | 44   | 37.392 | 0.0000 | 79.441  | 23292000 | 162       | 16.07 | 16.05 | 15.77 | 16.21 | 16.91 | 16.40 | 16.08 |       |
| 2.744 | -0.44 | 0.74 | Q9R0P5  | Destin                                                             | Dstin     | 5633 | 23 | 18 | 18 | 84.5 | 87.3 | 87.3 | 18.521 | 0.0000 | 91.881  | 69173000 | 389       | 17.59 | 17.06 | 17.54 | 18.08 | 18.14 | 18.05 | 17.87 |       |
| 0.918 | -0.44 | 0.74 | Q9GDC19 | N-acetylneuraminatase lyase                                        | Npl       | 5219 | 11 | 11 | 11 | 64.7 | 64.7 | 64.7 | 35.13  | 0.0000 | 159.45  | 13171000 | 146       | 15.21 | 15.23 | 15.11 | 15.25 | 15.89 | 15.32 | 16.03 |       |
| 1.117 | -0.44 | 0.74 | Q6PDY2  | 2-aminoethanethiol dioxigenase                                     | Ado       | 2621 | 7  | 7  | 7  | 34.8 | 34.8 | 34.8 | 28.372 | 0.0000 | 13.023  | 1366200  | 76        | 16.02 | 15.92 | 15.84 | 16.35 | 16.31 | 16.81 | 16.02 |       |
| 1.540 | -0.44 | 0.74 | Q8K1E6  | Alpha-ketoglutarate-dependent dioxigenase alkB homolog 3           | Alkhb3    | 3626 | 7  | 7  | 7  | 32.9 | 32.9 | 32.9 | 38.201 | 0.0000 | 16.713  | 6228900  | 69        | 14.29 | 14.43 | 14.37 | 15.11 | 14.57 | 14.87 | 14.66 |       |
| 1.200 | -0.44 | 0.74 | P23249  | Putative helicase MOV-10                                           | Mov10     | 881  | 13 | 13 | 13 | 17.3 | 17.3 | 17.3 | 113.58 | 0.0000 | 29.226  | 8321600  | 75        | 13.99 | 13.46 | 13.94 | 14.00 | 14.20 | 14.25 | 14.49 |       |
| 1.059 | -0.44 | 0.74 | P32020  | Non-specific lipid-transfer protein                                | Scp2      | 993  | 23 | 23 | 22 | 32.5 | 32.5 | 32   | 59.125 | 0.0000 | 139.11  | 12794000 | 622       | 17.90 | 17.57 | 18.42 | 18.25 | 18.89 | 18.51 | 18.50 |       |
| 2.076 | -0.44 | 0.74 | Q9D1J1  | Adaptin ear-binding coat-associated protein 2                      | Ncapd2    | 4920 | 9  | 9  | 9  | 47   | 47   | 47   | 28.598 | 0.0000 | 209.18  | 3433200  | 279       | 16.39 | 16.61 | 16.46 | 16.91 | 17.15 | 16.83 | 16.83 |       |
| 2.592 | -0.44 | 0.74 | Q8K224  | Condensin complex subunit 3                                        | Rbm39     | 3681 | 20 | 20 | 20 | 22.2 | 22.2 | 22.2 | 156.66 | 0.0000 | 123.43  | 1862600  | 158       | 15.26 | 15.21 | 15.28 | 15.80 | 15.53 | 15.64 | 15.80 |       |
| 2.538 | -0.44 | 0.74 | Q8VH51  | RNA-binding protein 9                                              | Gak3b     | 4016 | 20 | 20 | 20 | 37.9 | 37.9 | 37.9 | 59.406 | 0.0000 | 280.688 | 7924900  | 435       | 17.15 | 17.48 | 17.34 | 17.77 | 17.73 | 17.81 | 17.76 |       |
| 1.400 | -0.44 | 0.74 | Q9R960  | Glycogen synthase kinase-3 beta                                    | Zc3b3     | 5733 | 11 | 9  | 9  | 18.8 | 18.8 | 35.7 | 46.71  | 0.0000 | 86.021  | 14553000 | 153       | 15.31 | 15.40 | 15.47 | 16.06 | 16.06 | 15.59 | 15.63 |       |
| 0.256 | -0.45 | 0.73 | Q8CHP0  | Zinc finger CCHH domain-containing protein 3                       | Sclg1     | 3626 | 5  | 5  | 5  | 6    | 6    | 6    | 103.22 | 0.0024 | 2.9979  | 2354800  | 19        | 13.81 | 13.07 | 13.26 | 13.60 | 14.61 | 12.30 | 14.80 |       |
| 1.684 | -0.45 | 0.73 | Q9WUW5  | Succinyl-CoA ligase [ADP/GDP-forming] subunit alpha, mitochondrial | Themis2   | 5717 | 15 | 15 | 15 | 38.2 | 38.2 | 38.2 | 36.154 | 0.0000 | 233.69  | 14085000 | 632       | 17.41 | 17.48 | 17.71 | 17.84 | 18.26 | 17.88 | 17.95 |       |
| 0.912 | -0.45 | 0.73 | Q91YX0  | Protein THEMIS2                                                    | Hddc2     | 4183 | 19 | 19 | 19 | 45.2 | 45.2 | 45.2 | 74.377 | 0.0000 | 168.87  | 3760000  | 259       | 16.00 | 15.89 | 16.10 | 16.72 | 16.10 | 16.86 | 16.11 |       |
| 0.856 | -0.45 | 0.73 | Q35X03  | HD domain-containing protein 2                                     | Vinculin  | 2011 | 3  | 3  | 3  | 20.1 | 20.1 | 20.1 | 1810   | 0.0000 | 22.753  | 6.889    | 15        | 13.08 | 13.24 | 13.27 | 14.12 | 14.12 | 13.32 | 13.93 |       |
| 2.409 | -0.45 | 0.73 | Q64Z77  | Vesicle-associated membrane protein 3                              | Vamp3     | 2461 | 69 | 69 | 69 | 69.6 | 69.6 | 69.6 | 116.72 | 0.0000 | 323.31  | 27404000 | 1608      | 17.65 | 17.60 | 17.84 | 18.07 | 17.84 | 18.08 | 18.08 |       |
| 1.982 | -0.45 | 0.73 | P63024  | Vesicle-associated membrane protein 3                              | Vamp3     | 1480 | 8  | 8  | 8  | 67   | 67   | 67   | 11.48  | 0.0000 | 197.3   | 6460600  | 349       | 18.04 | 17.89 | 17.91 | 18.24 | 18.62 | 18.47 | 18.26 |       |
| 1.435 | -0.45 | 0.73 | G5E870  | E3 ubiquitin-protein ligase TRIP12                                 | Coro7     | 263  | 26 | 26 | 26 | 20.9 | 20.9 | 20.9 | 224.13 | 0.0000 | 323.31  | 39501000 | 462       | 15.49 | 15.53 | 15.89 | 15.87 | 16.01 | 16.13 | 16.34 |       |
| 1.200 | -0.45 | 0.73 | Q8BX06  | COMMD domain-containing protein 2                                  | Coro7     | 3285 | 5  | 5  | 5  | 30.7 | 30.7 | 30.7 | 22.848 | 0.0000 | 21.4    | 6298800  | 100       | 14.84 | 14.84 | 14.08 | 15.13 | 14.51 | 15.23 | 15.27 |       |
| 0.962 | -0.45 | 0.73 | Q91VR8  | Protein BRICK1                                                     | Coro7     | 4071 | 96 | 96 | 96 | 96   | 96   | 96   | 8.7698 | 0.0000 | 37.588  | 34739000 | 127       | 17.44 | 17.38 | 17.47 | 17.41 | 17.36 | 17.41 | 17.36 |       |
| 2.958 | -0.45 | 0.73 | Q9D2V7  | Coronin-7                                                          | Sf3a2     | 4953 | 42 | 42 | 42 | 42   | 42   | 42   | 10.81  | 0.0000 | 323.31  | 20404000 | 1014      | 18.08 | 18.09 | 18.21 | 18.68 | 18.63 | 18.51 | 18.48 |       |
| 1.370 | -0.45 | 0.73 | Q62203  | Splicing factor 3A subunit 2                                       | Snafp2    | 2369 | 11 | 11 | 11 | 27.8 | 27.8 | 27.8 | 49.911 | 0.0000 | 104.2   | 2450500  | 204       | 15.68 | 15.62 | 15.56 | 16.22 | 16.39 | 15.86 | 15.81 |       |
| 2.322 | -0.45 | 0.73 | Q90904  | Synaplocystin-like protein 23                                      | Snafp2    | 319  | 18 | 18 | 18 | 85.2 | 85.2 | 85.2 | 32.261 | 0.0000 | 323.31  | 12952000 | 527       | 18.05 | 17.95 | 18.12 | 18.62 | 18.58 | 18.53 | 18.29 |       |
| 2.347 | -0.45 | 0.73 | Q8B207  | Aans                                                               | Catb      | 2983 | 12 | 12 | 12 | 93.9 | 93.9 | 93.9 | 108.91 | 0.0000 | 323.31  | 22952000 | 1294      | 18.04 | 18.05 | 18.17 | 18.04 | 18.07 | 18.04 | 18.04 |       |
| 0.869 | -0.45 | 0.73 | Q62426  | Cystatin-B                                                         | Gmmpa     | 2391 | 12 | 12 | 12 | 93.9 | 93.9 | 93.9 | 11.045 | 0.0000 | 252.45  | 52368000 | 892       | 19.70 | 20.09 | 20.48 | 20.62 | 20.12 | 20.65 | 20.79 |       |
| 1.653 | -0.45 | 0.73 | Q922H4  | Mannose-1-phosphate guanylyltransferase alpha                      | Hist1H2af | 4258 | 17 | 17 | 17 | 41.4 | 41.4 | 41.4 | 46.244 | 0.0000 | 53.738  | 2833000  | 261       | 16.14 | 16.11 | 16.30 | 16.51 | 16.93 | 16.43 | 16.68 |       |
| 1.418 | -0.45 | 0.73 | Q8CGP5  | Histone H2A type 1-F                                               | Nemf      | 3512 | 18 | 5  | 1  | 80   | 28.5 | 28.5 | 6.9    | 14.61  | 0.0000  | 154.48   | 231170000 | 2259  | 22.23 | 22.72 | 22.65 | 23.01 | 22.89 | 22.83 | 23.22 |
| 0.979 | -0.46 | 0.73 | Q8B956  | Nuclear export protein 2B-BR2, membrane form-BR2 intracellular     | Itpr3     | 18   | 5  | 5  | 5  | 18.8 | 18.8 | 18.8 | 30.26  | 0.0000 | 15.8    | 77800    | 15        | 15.33 | 15.54 | 15.47 | 16.38 | 16.26 | 15.59 | 15.63 |       |
| 0.806 | -0.46 | 0.73 | Q8CPC0  | Nuclear export mediator factor Nrmf                                | Cno2      | 3452 | 24 | 24 | 24 | 28.8 | 28.8 | 28.8 | 121.19 | 0.0000 | 65.838  | 2696400  | 289       | 15.47 | 15.51 | 15.85 | 15.72 | 15.68 | 16.33 | 15.53 |       |
| 1.269 | -0.46 | 0.73 | P70227  | Inositol 1,4,5-trisphosphate receptor type 3                       | Aloxap    | 1537 | 8  | 8  | 8  | 4.5  | 4.5  | 4.5  | 304.27 | 0.0000 | 62.845  | 573600   | 67        | 14.58 | 14.11 | 14.14 | 14.85 | 14.94 | 14.71 | 14.43 |       |
| 1.152 | -0.46 | 0.73 | Q8C5L3  | CCR4-NOT transcription complex subunit 2                           | Aloxap    | 3397 | 5  | 5  | 5  | 17.4 | 17.4 | 17.4 | 59.71  | 0.0000 | 19.177  | 8214700  | 60        | 15.96 | 15.68 | 16.07 | 16.40 | 16.01 | 16.31 | 16.72 |       |
| 0.388 | -0.46 | 0.73 | P93055  | Arachidonate 5-lipoxygenase-activating protein                     | Glod4     | 977  | 4  | 4  | 4  | 19.9 | 19.9 | 19.9 | 18.136 | 0.0000 | 11.942  | 6342400  | 88        | 18.78 | 18.25 | 17.99 | 19.39 | 19.28 | 18.90 | 17.65 |       |
| 0.635 | -0.46 | 0.73 | Q92154  | Leukocyte elastase inhibitor A                                     | Gbp4      | 449  | 20 | 20 | 20 | 67.4 | 67.4 | 67.4 | 33.316 | 0.0000 | 269.38  | 9324600  | 596       | 16.77 | 16.99 | 17.26 | 17.49 | 17.55 | 17.35 | 17.47 |       |
| 1.783 | -0.46 | 0.73 | Q9PCP4  | Glyoxalase domain-containing protein 4                             | PRDX1     | 4538 | 20 | 20 | 20 | 67.4 | 67.4 | 67.4 | 33.316 | 0.0000 | 269.38  | 9324600  | 596       | 16.77 | 16.99 | 17.26 | 17.49 | 17.55 | 17.35 | 17.47 |       |
| 1.272 | -0.46 | 0.73 | Q61107  | Guanylate-binding protein 4                                        | PRDX1     | 2253 | 16 | 16 | 16 | 32.6 | 32.6 | 32.6 | 70.801 | 0.0000 | 74.575  | 13231000 | 127       | 14.16 | 14.01 | 14.27 | 14.71 | 14.97 | 14.43 | 14.32 |       |
| 0.584 | -0.46 | 0.73 | Q9B830  | Peroxiredoxin-1                                                    | Pkx       | 1752 | 18 | 6  | 4  | 69.3 | 69.3 | 69.3 | 22.11  | 0.0000 | 23.876  | 7766600  | 26        | 19.42 | 18.65 | 19.82 | 20.25 | 19.94 | 19.76 | 19.67 |       |
| 0.442 | -0.46 | 0.73 | Q8BX57  | Px domain-containing protein kinase-like protein                   | Zyx       | 3278 | 11 | 11 | 11 | 26.8 | 26.8 | 26.8 | 65.23  | 0.0000 | 31.468  | 795400   | 101       | 14.48 | 13.96 | 14.78 | 14.76 | 13.73 | 15.32 | 15.51 |       |
| 1.531 | -0.46 | 0.73 | Q62523  | Zyxin                                                              | Gemin5    | 2401 | 9  | 9  | 9  | 27   | 27   | 27   | 60.545 | 0.0000 | 35.76   | 2330500  | 164       | 15.99 | 16.43 | 16.53 | 16.79 | 16.64 | 16.79 | 16.90 |       |
| 0.794 | -0.46 | 0.73 | Q8BX17  | Gem-associated protein 5                                           | Lnc25     | 3277 | 8  | 8  | 8  | 7.9  | 7.9  | 7.9  | 166.59 | 0.0000 | 34.591  | 1106500  | 69        | 15.99 | 15.45 | 15.70 | 16.59 | 16.49 | 15.87 | 15.76 |       |
| 2.364 | -0.46 | 0.73 | Q8K111  | Leucine-rich repeat-containing protein 25                          | Rtp1b     | 3634 | 7  | 7  | 7  | 32.7 | 32.7 | 32.7 | 32.673 | 0.0000 | 151.29  | 2822800  | 249       | 15.22 | 15.16 | 15.44 | 15.84 | 15.64 | 15.66 | 15.81 |       |
| 0.46  | -0.46 | 0.73 | Q91YK2  | Ribosomal RNA processing protein 1, homolog B                      |           |      |    |    |    |      |      |      |        |        |         |          |           |       |       |       |       |       |       |       |       |

|       |       |      |        |                                                                              |          |      |    |    |    |      |      |      |        |        |        |           |      |       |       |       |       |       |       |       |
|-------|-------|------|--------|------------------------------------------------------------------------------|----------|------|----|----|----|------|------|------|--------|--------|--------|-----------|------|-------|-------|-------|-------|-------|-------|-------|
| 0.534 | -0.49 | 0.71 | Q8CHK3 | Lysophospholipid acyltransferase 7                                           | Mboat7   | 3255 | 4  | 4  | 4  | 13.1 | 13.1 | 13.1 | 53.435 | 0.0000 | 26.5   | 2515800   | 20   | 13.77 | 13.53 | 13.77 | 13.31 | 15.00 | 14.07 | 14.33 |
| 1.144 | -0.49 | 0.71 | Q8CBW3 | Abi interactor 1                                                             | Abi1     | 3439 | 25 | 25 | 18 | 50.3 | 50.3 | 43.5 | 52.287 | 0.0000 | 323.31 | 16857000  | 811  | 18.18 | 18.41 | 18.48 | 19.27 | 18.44 | 18.81 | 18.88 |
| 0.311 | -0.49 | 0.71 | Q05860 | Formin-1                                                                     | Fmn1     | 1743 | 3  | 3  | 3  | 2.6  | 2.6  | 2.6  | 163.58 | 0.0000 | 8.1526 | 1393100   | 33   | 12.59 | 12.67 | 13.10 | 13.34 | 14.80 | 12.55 | 12.43 |
| 1.753 | -0.49 | 0.71 | P50518 | V-type protein ATPase subunit E 1                                            | Atp6v1e1 | 1185 | 34 | 34 | 34 | 84.5 | 84.5 | 84.5 | 26.157 | 0.0000 | 323.31 | 52647000  | 1135 | 19.54 | 19.65 | 19.88 | 20.06 | 19.98 | 20.35 | 20.35 |
| 0.253 | -0.49 | 0.71 | Q02162 | V-type F1-ATPase domain-containing protein 167                               | Atp6b1   | 4893 | 16 | 16 | 16 | 45.4 | 45.4 | 45.4 | 11.475 | 0.0000 | 7.7901 | 3041600   | 35   | 14.54 | 14.67 | 14.92 | 14.71 | 14.39 | 13.87 | 13.91 |
| 0.700 | -0.49 | 0.71 | P62830 | 60S ribosomal protein L23                                                    | Rpl23    | 1489 | 36 | 36 | 36 | 77.1 | 77.1 | 77.1 | 14.865 | 0.0000 | 157.63 | 81885000  | 1007 | 20.54 | 21.41 | 21.72 | 21.43 | 21.70 | 21.89 | 22.00 |
| 0.541 | -0.49 | 0.71 | P62832 | Ubiquitin-40S ribosomal protein S27a;Ubiquitin;40S ribosomal protein S27     | Rps27a   | 1474 | 20 | 20 | 7  | 82.1 | 82.1 | 35.9 | 17.951 | 0.0000 | 323.31 | 102210000 | 1528 | 20.65 | 21.67 | 21.56 | 21.76 | 21.06 | 22.00 | 22.31 |
| 0.511 | -0.49 | 0.71 | Q9CQE5 | Regulator of G-protein signaling 10                                          | Rgs10    | 4589 | 15 | 15 | 15 | 77.9 | 77.9 | 77.9 | 21.151 | 0.0000 | 188.32 | 14740000  | 496  | 18.30 | 18.30 | 18.07 | 19.54 | 17.77 | 18.83 | 18.73 |
| 0.177 | -0.49 | 0.71 | Q8ZWY8 | Thymosin beta-10                                                             | Tmsb10   | 2711 | 2  | 2  | 2  | 36.4 | 36.4 | 36.4 | 5.0256 | 0.0004 | 4.5672 | 3260200   | 29   | 13.10 | 14.31 | 15.31 | 15.01 | 16.52 | 14.71 | 12.70 |
| 2.353 | -0.49 | 0.71 | P70295 | Ancient ubiquitin protein 1                                                  | Uba1     | 1548 | 15 | 15 | 15 | 38.5 | 38.5 | 38.5 | 46.121 | 0.0000 | 26.29  | 25534000  | 187  | 15.89 | 16.00 | 16.16 | 16.55 | 16.45 | 16.85 | 16.85 |
| 1.247 | -0.50 | 0.71 | Q3TC46 | Protein PAT1 homolog 1                                                       | Pat1     | 1823 | 10 | 10 | 10 | 16.6 | 16.6 | 16.6 | 86.769 | 0.0000 | 71.248 | 17111000  | 165  | 15.34 | 15.19 | 15.29 | 15.57 | 16.20 | 15.45 | 15.86 |
| 1.248 | -0.50 | 0.71 | Q9CX86 | Heterogeneous nuclear ribonucleoprotein A0                                   | Hnmpa0   | 4750 | 18 | 18 | 18 | 56.7 | 56.7 | 56.7 | 30.53  | 0.0000 | 90.438 | 56471000  | 349  | 16.51 | 16.77 | 16.94 | 16.81 | 17.36 | 17.30 | 17.47 |
| 0.847 | -0.50 | 0.71 | Q8CS47 | HEAT1 repeat-containing protein S8                                           | Heat5b   | 3392 | 23 | 23 | 23 | 17.6 | 17.6 | 17.6 | 22.32  | 0.0000 | 81.041 | 11416000  | 159  | 14.64 | 13.80 | 13.69 | 14.63 | 14.82 | 14.37 | 14.33 |
| 1.078 | -0.50 | 0.71 | Q8BX40 | Cytosolic endo-beta-N-acetylglucosaminidase                                  | Engase   | 3280 | 5  | 5  | 5  | 10.1 | 10.1 | 10.1 | 82.944 | 0.0000 | 17.144 | 8955000   | 97   | 15.16 | 14.93 | 14.63 | 15.65 | 15.82 | 15.44 | 14.98 |
| 0.595 | -0.50 | 0.71 | Q8QDW8 | Uncharacterized protein C17orf59 homolog                                     |          | 5011 | 4  | 4  | 4  | 18.9 | 18.9 | 18.9 | 38.011 | 0.0000 | 35.209 | 3521800   | 37   | 13.48 | 13.64 | 14.23 | 14.54 | 14.79 | 13.48 | 14.31 |
| 0.865 | -0.50 | 0.71 | Q9CWW6 | Peptidyl-prolyl cis-trans isomerase NIMA-interacting 4                       | Pin4     | 4735 | 11 | 11 | 11 | 74.8 | 74.8 | 74.8 | 13.815 | 0.0000 | 206.16 | 10170000  | 270  | 18.27 | 18.55 | 18.54 | 19.47 | 18.37 | 19.05 | 18.92 |
| 0.347 | -0.50 | 0.71 | Q9QUH3 | B-cell linker protein                                                        | Blnk     | 5520 | 8  | 8  | 8  | 20.8 | 20.8 | 20.8 | 50.67  | 0.0000 | 48.453 | 7963400   | 81   | 14.95 | 15.10 | 15.60 | 16.16 | 14.32 | 16.60 | 15.80 |
| 1.165 | -0.50 | 0.71 | Q0QPI9 | Heterogeneous nuclear ribonucleoprotein U-like protein 2                     | Hnmpu2   | 1703 | 24 | 24 | 24 | 39.1 | 39.1 | 39.1 | 84.939 | 0.0000 | 230.24 | 84807000  | 465  | 16.82 | 17.21 | 17.28 | 17.45 | 17.25 | 17.81 | 17.50 |
| 2.318 | -0.50 | 0.71 | Q80X41 | Serine/threonine-protein kinase VRK1                                         | Vrk1     | 2869 | 18 | 18 | 18 | 45   | 45   | 45   | 49.74  | 0.0000 | 175.9  | 38151000  | 360  | 16.43 | 16.46 | 16.58 | 16.85 | 16.95 | 16.93 | 17.22 |
| 1.284 | -0.50 | 0.71 | Q6PGC1 | ATP-dependent RNA helicase Dhs29                                             | Dhs29    | 2632 | 28 | 28 | 28 | 24.6 | 24.6 | 24.6 | 153.97 | 0.0000 | 144.06 | 28833000  | 305  | 15.65 | 15.37 | 15.78 | 15.75 | 16.16 | 16.04 | 16.44 |
| 1.117 | -0.50 | 0.71 | P03930 | ATP synthase protein 8                                                       | Matp8    | 632  | 4  | 4  | 4  | 31.3 | 31.3 | 31.3 | 7.662  | 0.0000 | 6.5461 | 30127000  | 84   | 17.65 | 17.17 | 17.51 | 18.12 | 17.48 | 18.13 | 17.96 |
| 1.639 | -0.51 | 0.71 | P23116 | Eukaryotic translation initiation factor 3 subunit A                         | Eif3a    | 879  | 99 | 99 | 99 | 58.6 | 58.6 | 58.6 | 161.93 | 0.0000 | 323.31 | 37696000  | 2049 | 17.37 | 17.36 | 17.51 | 17.67 | 17.84 | 17.87 | 18.01 |
| 1.464 | -0.50 | 0.71 | Q08915 | AH receptor-interacting protein                                              | Aip      | 3111 | 15 | 15 | 15 | 51.8 | 51.8 | 51.8 | 37.605 | 0.0000 | 61.257 | 32254000  | 273  | 15.77 | 16.10 | 16.35 | 16.82 | 16.50 | 16.54 | 16.43 |
| 0.396 | -0.50 | 0.71 | Q9EQU3 | Toll-like receptor 9                                                         | Tlr9     | 5288 | 11 | 11 | 11 | 15.3 | 15.3 | 15.3 | 116.41 | 0.0000 | 49.093 | 7251400   | 49   | 14.02 | 13.64 | 14.19 | 14.41 | 15.80 | 13.62 | 14.92 |
| 1.192 | -0.50 | 0.71 | Q14D01 | Protein FAM219B                                                              | Fam219b  | 1732 | 3  | 3  | 3  | 19.3 | 19.3 | 19.3 | 21.006 | 0.0000 | 50.556 | 2240500   | 47   | 13.32 | 13.37 | 13.24 | 13.66 | 13.46 | 13.85 | 14.29 |
| 2.122 | -0.50 | 0.71 | Q8BXV3 | Gephyrin;Molybdopter adenylyltransferase;Molybdopter molybdenum;Dphn         | Gphn     | 3230 | 12 | 12 | 12 | 25.1 | 25.1 | 25.1 | 63.281 | 0.0000 | 62.88  | 15451000  | 146  | 15.17 | 15.17 | 15.25 | 15.48 | 15.65 | 15.86 | 15.86 |
| 0.916 | -0.50 | 0.71 | Q8CJL8 | Conserved oligomeric Golgi complex subunit 5                                 | Cog5     | 3343 | 15 | 15 | 15 | 26.8 | 26.8 | 26.8 | 91.30  | 0.0000 | 61.782 | 29254000  | 116  | 17.05 | 17.69 | 16.98 | 18.01 | 16.97 | 17.30 | 17.48 |
| 1.230 | -0.51 | 0.70 | Q9WTP6 | Adenylate kinase 2, mitochondrial;Adenylate kinase 2, mitochondrial, N-terA2 |          | 5681 | 17 | 17 | 17 | 72   | 72   | 72   | 26.468 | 0.0000 | 101.09 | 44029000  | 314  | 16.00 | 16.20 | 16.66 | 17.11 | 16.67 | 16.70 | 16.68 |
| 0.778 | -0.51 | 0.70 | Q99M96 | Nucleolar GTP-binding protein 1                                              | Gtpbp4   | 4464 | 15 | 15 | 15 | 24.8 | 24.8 | 24.8 | 74.112 | 0.0000 | 21.193 | 14642000  | 111  | 14.40 | 14.67 | 14.90 | 14.78 | 14.71 | 15.55 | 15.52 |
| 1.657 | -0.51 | 0.70 | Q8QCY4 | Acetyl-CoA acetyltransferase, cytosolic                                      | Acct     | 3432 | 24 | 24 | 24 | 75.1 | 75.1 | 75.1 | 41.297 | 0.0000 | 323.31 | 10349000  | 498  | 17.24 | 17.30 | 17.48 | 17.90 | 18.15 | 17.59 | 17.74 |
| 1.022 | -0.51 | 0.70 | Q8C4B4 | Protein unc-119 homolog B                                                    | Unc119b  | 3382 | 10 | 10 | 10 | 27.1 | 27.1 | 27.1 | 28.302 | 0.0000 | 24.39  | 52912000  | 78   | 14.28 | 14.12 | 14.72 | 15.01 | 14.28 | 14.72 | 14.72 |
| 2.394 | -0.51 | 0.70 | Q9DCV4 | Electron transfer flavoprotein subunit beta                                  | Eatb     | 5235 | 27 | 27 | 27 | 84.3 | 84.3 | 84.3 | 27.623 | 0.0000 | 181.49 | 25127000  | 802  | 18.86 | 19.11 | 19.04 | 19.57 | 19.39 | 19.68 | 19.42 |
| 1.016 | -0.51 | 0.70 | Q50508 | Serine/threonine-protein kinase 10                                           | Slk10    | 450  | 44 | 41 | 41 | 43.3 | 41   | 41   | 111.9  | 0.0000 | 198.76 | 60888000  | 550  | 15.91 | 16.32 | 16.40 | 16.42 | 16.41 | 16.91 | 17.13 |
| 2.961 | -0.51 | 0.70 | Q81753 | D-3-phosphoglycerate dehydrogenase                                           | Pgdhg    | 2332 | 30 | 30 | 30 | 47.5 | 47.5 | 47.5 | 56.585 | 0.0000 | 323.31 | 19931000  | 947  | 17.97 | 18.01 | 18.00 | 18.55 | 18.63 | 18.49 | 18.33 |
| 1.928 | -0.51 | 0.70 | Q8B984 | Conserved inhibitory activity protein 3                                      | Mac3     | 3055 | 22 | 22 | 22 | 13.9 | 13.9 | 13.9 | 213.67 | 0.0000 | 45.563 | 24141000  | 163  | 15.41 | 15.62 | 16.38 | 16.57 | 16.28 | 16.78 | 16.78 |
| 0.644 | -0.51 | 0.70 | Q921N6 | Probable ATP-dependent RNA helicase DDX27                                    | Ddx27    | 4235 | 8  | 8  | 8  | 14.2 | 14.2 | 14.2 | 85.938 | 0.0000 | 8.9802 | 7326800   | 80   | 15.07 | 15.22 | 15.08 | 15.57 | 14.81 | 15.87 | 16.29 |
| 1.037 | -0.51 | 0.70 | Q9CPR5 | 39S ribosomal protein L15, mitochondrial                                     | Mrlp15   | 4530 | 16 | 16 | 16 | 66.1 | 66.1 | 66.1 | 33.541 | 0.0000 | 125.63 | 35081000  | 329  | 15.44 | 15.79 | 15.07 | 15.98 | 16.14 | 16.10 | 16.77 |
| 1.683 | -0.51 | 0.70 | Q8K0V4 | CCR4-NOT transcription complex subunit 3                                     | Cnot3    | 3910 | 8  | 8  | 7  | 11.3 | 11.3 | 11.3 | 81.945 | 0.0000 | 13.394 | 7474900   | 72   | 14.51 | 14.20 | 14.60 | 15.21 | 14.96 | 14.83 | 14.79 |
| 2.132 | -0.51 | 0.70 | P97871 | 39S ribosomal protein L16, mitochondrial                                     | Cnrk1    | 1502 | 10 | 10 | 10 | 69.3 | 69.3 | 69.3 | 24.942 | 0.0000 | 141.33 | 40320000  | 209  | 17.77 | 17.19 | 17.60 | 17.98 | 17.67 | 18.14 | 18.14 |
| 0.454 | -0.51 | 0.70 | Q88942 | Nuclear factor of activated T-cells, cytoplasmic 1                           | Nfatc1   | 586  | 4  | 4  | 4  | 14.2 | 14.2 | 14.2 | 77.832 | 0.0000 | 70.872 | 2228500   | 48   | 13.17 | 13.73 | 13.43 | 13.32 | 13.05 | 14.80 | 13.33 |
| 1.039 | -0.51 | 0.70 | Q35344 | Importin subunit alpha-4                                                     | Kpna3    | 359  | 16 | 11 | 11 | 41.8 | 33   | 33   | 57.772 | 0.0000 | 201.6  | 20523000  | 119  | 16.75 | 17.16 | 16.78 | 17.19 | 17.40 | 17.11 | 17.94 |
| 2.913 | -0.51 | 0.70 | Q8K1E0 | Syntaxin-5                                                                   | Stx5     | 3625 | 11 | 11 | 11 | 44.2 | 44.2 | 44.2 | 39.713 | 0.0000 | 93.409 | 30866000  | 204  | 16.42 | 16.37 | 16.48 | 16.95 | 16.79 | 17.09 | 16.91 |
| 0.740 | -0.51 | 0.70 | P10711 | Transcription elongation factor A protein 1                                  | Tcea1    | 728  | 28 | 28 | 28 | 78.4 | 78.4 | 78.4 | 33.88  | 0.0000 | 323.31 | 10055000  | 677  | 16.15 | 17.20 | 16.72 | 17.67 | 16.94 | 16.90 | 17.32 |
| 2.226 | -0.52 | 0.70 | Q8CJL8 | Structural maintenance of chromosomes protein 1A                             | Smc1a    | 4703 | 78 | 78 | 78 | 58.9 | 58.9 | 58.9 | 141.33 | 0.0000 | 323.31 | 22653000  | 1423 | 17.67 | 17.67 | 17.07 | 18.14 | 18.16 | 18.37 | 18.47 |
| 0.527 | -0.52 | 0.70 | Q9CQK7 | 39S ribosomal protein L41, mitochondrial                                     | Mrlp41   | 4617 | 8  | 8  | 8  | 60.7 | 60.7 | 60.7 | 15.261 | 0.0000 | 11.867 | 13994000  | 102  | 15.12 | 15.92 | 15.84 | 16.54 | 15.16 | 16.34 | 16.53 |
| 2.963 | -0.52 | 0.70 | Q35643 | AP-1 complex subunit beta-1                                                  | Ap1b1    | 392  | 45 | 22 | 22 | 49   | 30.2 | 30.2 | 103.93 | 0.0000 | 323.31 | 81607000  | 403  | 17.79 | 17.65 | 17.55 | 18.24 | 18.26 | 18.09 | 18.12 |
| 1.581 | -0.52 | 0.70 | Q9EQ32 | Phosphoinositide 3-kinase adapter protein 1                                  | Pik3ap1  | 5921 | 16 | 16 | 16 | 24.4 | 24.4 | 24.4 | 90.927 | 0.0000 | 97.436 | 47811000  | 320  | 16.24 | 16.69 | 16.71 | 17.27 | 17.09 | 16.84 | 17.07 |
| 1.333 | -0.52 | 0.70 | Q8B952 | Protein unc-7 homolog C                                                      | Unc7     | 587  | 7  | 7  | 7  | 37.8 | 37.8 | 37.8 | 21.834 | 0.0000 | 14.873 | 10012000  | 125  | 15.26 | 15.42 | 16.38 | 16.57 | 16.28 | 16.78 | 16.52 |
| 0.445 | -0.52 | 0.70 | Q6N280 | DnaJ homolog subfamily C member 8                                            | Dnajc8   | 2542 | 19 | 19 | 18 | 75.5 | 75.5 | 75.5 | 29.812 | 0.0000 | 175.9  | 23278000  | 177  | 14.45 | 16.49 | 15.50 | 16.18 | 15.78 | 15.80 | 16.25 |
| 1.207 | -0.52 | 0.70 | Q92Z18 | Succinyl-CoA ligase (GDP-forming) subunit beta, mitochondrial                | Sucg2    | 5856 | 20 | 20 | 20 | 75.1 | 75.1 | 75.1 | 46.839 | 0.0000 | 256.78 | 80761000  | 550  | 16.88 | 17.38 | 17.63 | 17.59 | 18.06 | 17.77 | 17.84 |
| 1.060 | -0.52 | 0.70 | Q921X4 | Interleukin enhancer-binding factor 3                                        | Ilf3     | 5825 | 22 | 22 | 22 | 27.6 | 27.6 | 27.  |        |        |        |           |      |       |       |       |       |       |       |       |

|       |       |      |        |                                                                                    |         |      |     |     |      |      |      |        |         |        |           |           |       |       |       |       |       |       |       |       |
|-------|-------|------|--------|------------------------------------------------------------------------------------|---------|------|-----|-----|------|------|------|--------|---------|--------|-----------|-----------|-------|-------|-------|-------|-------|-------|-------|-------|
| 0.437 | -0.55 | 0.68 | Q6PA04 | RNA exonuclease 4                                                                  | Rexo4   | 2598 | 5   | 5   | 5    | 14.1 | 14.1 | 14.1   | 47.598  | 0.0000 | 9.6187    | 2474900   | 27    | 12.86 | 13.24 | 13.61 | 13.91 | 12.56 | 14.00 | 14.68 |
| 0.324 | -0.55 | 0.68 | P70444 | BH3-interacting domain death agonist,BH3-interacting domain death agonist          | Bid     | 1575 | 5   | 5   | 5    | 34.4 | 34.4 | 34.4   | 21.951  | 0.0000 | 46.989    | 6643400   | 94    | 13.43 | 14.12 | 14.87 | 15.21 | 13.28 | 14.54 | 15.73 |
| 0.719 | -0.55 | 0.68 | Q8VEL2 | Myotubularin-related protein 14                                                    | Mtmr14  | 4013 | 6   | 6   | 6    | 15.1 | 15.1 | 15.1   | 72.442  | 0.0000 | 50.148    | 6768700   | 37    | 15.39 | 14.44 | 14.77 | 15.20 | 16.14 | 15.14 | 15.20 |
| 0.506 | -0.56 | 0.68 | Q9Z120 | tRNA (guanine-N(7)-methyltransferase                                               | Mettr1  | 5796 | 2   | 2   | 2    | 10.8 | 10.8 | 10.8   | 30.603  | 0.0000 | 6.5996    | 890420    | 19    | 13.54 | 12.47 | 12.42 | 13.14 | 14.13 | 12.59 | 13.80 |
| 1.454 | -0.56 | 0.68 | Q7TMV8 | Huwei-1                                                                            | Huwei1  | 2754 | 37  | 37  | 37   | 15.2 | 15.2 | 15.2   | 482.631 | 0.0000 | 33.331    | 34529000  | 458   | 15.27 | 15.02 | 15.62 | 15.89 | 15.82 | 15.82 | 14.28 |
| 1.876 | -0.56 | 0.68 | Q6R233 | Tapasin                                                                            | Tapbp   | 5760 | 19  | 19  | 19   | 45.4 | 45.4 | 45.4   | 40.736  | 0.0000 | 23777     | 124680000 | 538   | 17.56 | 17.47 | 17.52 | 18.40 | 17.92 | 18.08 | 17.84 |
| 0.773 | -0.56 | 0.68 | Q501J7 | Phosphatase and actin regulator 4                                                  | Phactr4 | 2076 | 3   | 3   | 3    | 5.2  | 5.2  | 5.2    | 76.631  | 0.0025 | 2.806     | 1149300   | 5     | 12.42 | 12.71 | 12.72 | 12.83 | 12.88 | 12.96 | 14.02 |
| 1.089 | -0.56 | 0.68 | Q8R5J9 | PRAI1 family protein 3                                                             | Art6p5  | 3890 | 15  | 15  | 15   | 39.9 | 39.9 | 39.9   | 21.557  | 0.0000 | 126.72    | 36792000  | 180   | 16.41 | 17.12 | 16.64 | 17.13 | 16.95 | 17.37 | 17.68 |
| 1.108 | -0.56 | 0.68 | Q61171 | Peroxiredoxin-2                                                                    | Prdx2   | 2267 | 12  | 11  | 11   | 57.6 | 57.6 | 57.6   | 21.778  | 0.0000 | 323.31    | 52458000  | 738   | 19.84 | 20.28 | 20.39 | 21.11 | 20.52 | 20.42 | 20.97 |
| 0.904 | -0.56 | 0.68 | P50600 | Matrix metalloproteinase-14                                                        | Mmp14   | 1235 | 8   | 8   | 8    | 14.1 | 14.1 | 14.1   | 95.918  | 0.0000 | 15.721    | 6170600   | 71    | 14.53 | 14.02 | 14.26 | 15.11 | 14.02 | 14.61 | 14.28 |
| 2.125 | -0.56 | 0.68 | Q8R035 | Peptidyl-L-lysine hydrolase ICT1, mitochondrial                                    | Ict1    | 3745 | 9   | 9   | 9    | 55.3 | 55.3 | 55.3   | 23.477  | 0.0000 | 46.432    | 18715000  | 157   | 15.64 | 15.96 | 16.05 | 16.27 | 16.42 | 16.55 | 16.54 |
| 1.194 | -0.56 | 0.68 | Q6QYV8 | Spastin                                                                            | Spast   | 5581 | 20  | 20  | 20   | 44.1 | 44.1 | 44.1   | 66.455  | 0.0000 | 152.98    | 33581000  | 296   | 15.25 | 15.94 | 16.04 | 16.15 | 16.14 | 16.41 | 16.51 |
| 1.114 | -0.56 | 0.68 | P16254 | Signal recognition particle 14 kDa protein;Signal recognition particle 14 kD Srp14 | Srp14   | 807  | 9   | 9   | 9    | 55.5 | 55.5 | 55.5   | 12.51   | 0.0000 | 72.679    | 42055000  | 158   | 16.75 | 17.34 | 17.54 | 17.47 | 17.73 | 17.78 | 18.12 |
| 0.405 | -0.56 | 0.68 | Q6QVD0 | Protein KR11 homolog                                                               | Kr11    | 3969 | 11  | 11  | 11   | 21.7 | 21.7 | 21.7   | 82.056  | 0.0000 | 14.553    | 5695800   | 28    | 13.60 | 15.03 | 14.31 | 14.57 | 14.15 | 14.71 | 16.08 |
| 1.319 | -0.56 | 0.68 | Q6O865 | MAP kinase-interacting serine/threonine-protein kinase 1                           | Mknk1   | 281  | 8   | 8   | 8    | 26.2 | 26.2 | 26.2   | 47.914  | 0.0000 | 204.46    | 18115000  | 132   | 14.45 | 14.99 | 15.05 | 15.04 | 15.60 | 15.43 | 15.52 |
| 0.471 | -0.56 | 0.68 | Q6UM53 | ADP-ribosylation factor-like protein 6-interacting protein 4                       | Art6p4  | 5501 | 3   | 3   | 3    | 22.3 | 22.3 | 22.3   | 25.524  | 0.0000 | 39.989    | 1821400   | 44    | 13.09 | 14.62 | 12.98 | 14.53 | 13.45 | 14.48 | 14.05 |
| 1.731 | -0.56 | 0.68 | Q9QWY8 | Arf-GAP with SH3 domain, ANK repeat and PH domain-containing protein               | Asap1   | 5530 | 18  | 18  | 18   | 21.8 | 21.8 | 21.8   | 127.42  | 0.0000 | 133.11    | 32824000  | 270   | 15.97 | 15.83 | 16.27 | 16.35 | 16.57 | 16.58 | 16.86 |
| 0.694 | -0.56 | 0.68 | P50690 | Eicosome component 10                                                              | Eicos10 | 1294 | 16  | 16  | 16   | 24.6 | 24.6 | 24.6   | 100.94  | 0.0000 | 53.802    | 14827000  | 158   | 14.65 | 14.94 | 15.17 | 14.94 | 15.07 | 15.65 | 16.28 |
| 1.870 | -0.57 | 0.68 | Q6NZ46 | Eukaryotic translation initiation factor 4 gamma 1                                 | Elf4g1  | 2546 | 47  | 47  | 47   | 33.8 | 33.8 | 33.8   | 76.107  | 0.0000 | 295.24    | 152010000 | 1012  | 17.90 | 17.98 | 18.06 | 18.30 | 18.61 | 18.42 | 18.86 |
| 1.648 | -0.57 | 0.68 | Q6ZWV3 | 60S ribosomal protein L10                                                          | Rpl10   | 2707 | 26  | 26  | 26   | 75.2 | 75.2 | 75.2   | 24.604  | 0.0000 | 323.31    | 374820000 | 1013  | 18.45 | 18.66 | 18.85 | 19.05 | 19.10 | 19.13 | 19.58 |
| 1.589 | -0.57 | 0.68 | Q8OWU7 | Protein LYRIC                                                                      | Lth     | 2863 | 20  | 20  | 20   | 40.4 | 40.4 | 40.4   | 63.845  | 0.0000 | 323.31    | 95079000  | 620   | 16.93 | 17.00 | 16.89 | 17.25 | 17.24 | 17.77 | 17.76 |
| 1.612 | -0.57 | 0.68 | P60229 | Peroxiredoxin-5, mitochondrial                                                     | Prdx5   | 1694 | 19  | 19  | 19   | 59.5 | 59.5 | 59.5   | 23.37   | 0.0000 | 323.31    | 405710000 | 934   | 19.59 | 19.66 | 20.01 | 20.59 | 20.05 | 20.56 | 20.35 |
| 1.252 | -0.57 | 0.68 | P22907 | Porphobilinogen deaminase                                                          | Hmba    | 878  | 13  | 13  | 13   | 45.2 | 45.2 | 45.2   | 39.444  | 0.0000 | 185.73    | 28841000  | 253   | 16.28 | 15.96 | 15.95 | 16.85 | 17.01 | 16.30 | 16.36 |
| 0.462 | -0.57 | 0.67 | Q08691 | Arginase-2, mitochondrial                                                          | Arg2    | 286  | 3   | 3   | 3    | 12.4 | 12.4 | 12.4   | 38.878  | 0.0000 | 7.1375    | 4324300   | 15    | 13.92 | 14.93 | 15.11 | 15.20 | 14.22 | 16.06 | 15.40 |
| 0.466 | -0.57 | 0.67 | Q9U1C9 | Ribosomal RNA-processing protein 7 homolog A                                       | Rrp7a   | 4906 | 6   | 6   | 6    | 31.1 | 31.1 | 31.1   | 32.399  | 0.0000 | 13.369    | 6846300   | 45    | 13.81 | 15.13 | 14.58 | 14.78 | 14.21 | 15.41 | 15.90 |
| 1.730 | -0.57 | 0.67 | Q9D986 | Neurogranin                                                                        | Nrgn    | 5135 | 6   | 6   | 6    | 31.1 | 31.1 | 31.1   | 65.658  | 0.0000 | 42.289    | 105296000 | 113   | 15.05 | 15.34 | 15.78 | 15.86 | 16.10 | 15.91 | 15.36 |
| 0.524 | -0.57 | 0.67 | Q811U3 | Iron-responsive element-binding protein 2                                          | Ireb2   | 2637 | 7   | 7   | 7    | 13.2 | 13.2 | 13.2   | 104.92  | 0.0000 | 57.051    | 6051200   | 75    | 16.27 | 13.79 | 14.51 | 15.92 | 14.92 | 14.68 | 14.12 |
| 0.718 | -0.57 | 0.67 | Q6Z419 | Endoplasmic A2                                                                     | Sn3p1   | 2388 | 25  | 25  | 25   | 58.2 | 58.2 | 58.2   | 41.158  | 0.0000 | 198.71    | 74183000  | 411   | 16.57 | 16.98 | 17.00 | 18.14 | 16.67 | 17.58 | 17.31 |
| 1.285 | -0.57 | 0.67 | Q6QZM2 | 60S ribosomal protein L15                                                          | Rpl15   | 4833 | 17  | 17  | 17   | 59.8 | 59.8 | 59.8   | 24.466  | 0.0000 | 93.054    | 126080000 | 358   | 18.23 | 18.50 | 18.54 | 18.68 | 18.71 | 19.23 | 19.37 |
| 0.866 | -0.57 | 0.67 | Q9DC37 | Major facilitator superfamily domain-containing protein 1                          | Mfsd1   | 5190 | 7   | 7   | 7    | 9.9  | 9.9  | 9.9    | 51.396  | 0.0000 | 34.816    | 2343800   | 90    | 16.75 | 16.27 | 16.35 | 16.97 | 17.75 | 16.57 | 16.83 |
| 2.327 | -0.57 | 0.67 | Q61768 | Kinesin-1 heavy chain                                                              | Kif5b   | 2337 | 90  | 90  | 90   | 72.8 | 72.8 | 72.8   | 109.55  | 0.0000 | 323.31    | 337950000 | 2028  | 18.57 | 18.62 | 18.72 | 19.35 | 18.47 | 18.64 | 18.54 |
| 0.535 | -0.57 | 0.67 | P06240 | Proto-oncogene tyrosine-protein kinase LCK                                         | Lck     | 656  | 1   | 1   | 1    | 2.8  | 2.8  | 2.8    | 57.942  | 0.0008 | 4.0969    | 1462500   | 27    | 12.51 | 12.07 | 12.38 | 13.67 | 11.92 | 13.04 | 12.70 |
| 1.239 | -0.58 | 0.67 | P31230 | Aminoacyl tRNA synthase complex-interacting multifunctional protein 1;EnAimp1      | EnAimp1 | 954  | 17  | 17  | 17   | 70.3 | 70.3 | 70.3   | 33.997  | 0.0000 | 282.25    | 59019000  | 483   | 16.15 | 16.61 | 16.61 | 17.41 | 16.68 | 17.20 | 16.85 |
| 0.554 | -0.58 | 0.67 | Q8CGA0 | Protein phosphatase 1F                                                             | Ppm1f   | 3802 | 8   | 8   | 8    | 28.8 | 28.8 | 28.8   | 49.61   | 0.0000 | 48.23     | 7276000   | 60    | 14.80 | 14.86 | 14.78 | 15.48 | 15.22 | 16.41 | 14.46 |
| 0.372 | -0.58 | 0.67 | E9Q257 | Dysostein                                                                          | Dys     | 123  | 123 | 123 | 37.1 | 37.1 | 37.1 | 332.91 | 0.0000  | 323.31 | 185540000 | 129       | 17.95 | 16.36 | 16.97 | 18.33 | 16.57 | 16.48 | 16.54 |       |
| 2.418 | -0.58 | 0.67 | P70195 | Proteasome subunit beta type-7                                                     | Psmo7   | 1533 | 8   | 8   | 8    | 23.8 | 23.8 | 23.8   | 29.891  | 0.0000 | 226.12    | 117190000 | 412   | 19.17 | 19.06 | 19.03 | 19.46 | 19.79 | 19.57 | 19.85 |
| 1.255 | -0.58 | 0.67 | Q8C156 | Ncap                                                                               | Ncap    | 3353 | 7   | 7   | 7    | 13.3 | 13.3 | 13.3   | 82.302  | 0.0000 | 24.701    | 3802200   | 75    | 14.01 | 14.14 | 14.20 | 15.00 | 15.02 | 14.23 | 14.53 |
| 1.397 | -0.58 | 0.67 | Q64152 | Transcription factor BTf3                                                          | Btf3    | 2421 | 14  | 14  | 14   | 75.5 | 75.5 | 75.5   | 22.031  | 0.0000 | 323.31    | 119920000 | 520   | 17.53 | 18.01 | 17.90 | 18.82 | 18.18 | 18.25 | 18.33 |
| 0.988 | -0.58 | 0.67 | Q6OY10 | Fam60b                                                                             | Fam60b  | 161  | 36  | 36  | 36   | 15.1 | 15.1 | 15.1   | 45.340  | 0.0000 | 107.17    | 20163000  | 131   | 16.17 | 16.08 | 15.77 | 16.17 | 16.08 | 15.77 | 16.17 |
| 2.867 | -0.58 | 0.67 | Q9Z821 | ATPase family AAA domain-containing protein 3                                      | At3p3   | 5421 | 32  | 32  | 32   | 51.4 | 51.4 | 51.4   | 66.741  | 0.0000 | 192.53    | 43207000  | 423   | 16.03 | 15.75 | 16.00 | 16.44 | 16.46 | 16.63 | 16.46 |
| 0.644 | -0.58 | 0.67 | Q9WVR4 | Fragile X mental retardation syndrome-related protein 2                            | Fxr2    | 5760 | 11  | 9   | 9    | 22.4 | 18.4 | 18.4   | 73.742  | 0.0000 | 62.064    | 5863800   | 106   | 14.31 | 14.86 | 14.40 | 15.36 | 14.19 | 15.09 | 15.77 |
| 2.203 | -0.58 | 0.67 | Q8K124 | Pleckstrin homology domain-containing family O member 2                            | Plekho2 | 3613 | 33  | 33  | 33   | 63.4 | 63.4 | 63.4   | 53.872  | 0.0000 | 32.313    | 153680000 | 904   | 17.05 | 17.03 | 17.27 | 17.85 | 17.71 | 17.80 | 17.43 |
| 0.926 | -0.58 | 0.67 | Q6Q872 | Eukaryotic translation initiation factor 1A                                        | Eif1a   | 2218 | 11  | 11  | 11   | 61.8 | 61.8 | 61.8   | 7.6     | 0.0000 | 176.94    | 57202000  | 280   | 16.71 | 17.69 | 17.47 | 18.18 | 18.08 | 17.58 | 17.64 |
| 1.823 | -0.58 | 0.67 | Q6U4U5 | Acropilin chromatin condensation inducer in the nucleus                            | Actn1   | 5417 | 24  | 24  | 24   | 24.7 | 24.7 | 24.7   | 152.72  | 0.0000 | 203.16    | 29029000  | 266   | 16.47 | 15.47 | 14.23 | 15.00 | 15.70 | 16.82 | 15.64 |
| 0.955 | -0.58 | 0.67 | Q9QD30 | ATP synthase subunit delta, mitochondrial                                          | At5d    | 466  | 2   | 2   | 2    | 13.7 | 13.7 | 13.7   | 17.6    | 0.0004 | 4.7723    | 4285100   | 42    | 15.36 | 14.45 | 15.15 | 16.46 | 16.02 | 15.28 | 15.86 |
| 1.340 | -0.58 | 0.67 | Q3UHH8 | Glucoside xylosyltransferase 1                                                     | Gxyt1   | 1973 | 6   | 6   | 6    | 14.6 | 14.6 | 14.6   | 46.49   | 0.0000 | 11.19     | 1893600   | 44    | 13.00 | 12.65 | 12.36 | 15.12 | 12.71 | 13.10 | 12.08 |
| 0.405 | -0.58 | 0.67 | P14131 | 40S ribosomal protein S16                                                          | Rps16   | 774  | 22  | 22  | 22   | 78.8 | 78.8 | 78.8   | 16.445  | 0.0000 | 48.605    | 24735000  | 655   | 15.86 | 15.84 | 15.80 | 16.43 | 16.88 | 16.54 | 15.96 |
| 3.116 | -0.58 | 0.67 | Q9Q2C1 | Aladin                                                                             | Mtla    | 5603 | 30  | 30  | 30   | 30.4 | 30.4 | 30.4   | 206.5   | 0.0000 | 167.49    | 49910000  | 515   | 15.86 | 15.97 | 16.02 | 16.87 | 16.38 | 16.54 | 16.54 |
| 1.112 | -0.58 | 0.67 | P18155 | Bifunctional methylenetetrahydrofolate dehydrogenase/cyclohydrolase, mitochondrial | MtHfd2  | 834  | 17  | 17  | 17   | 53.1 | 53.1 | 53.1   | 37.863  | 0.0000 | 129.78    | 40830000  | 259   | 16.59 | 17.03 | 17.39 | 17.27 | 17.46 | 17.66 | 17.98 |
| 1.230 | -0.59 | 0.67 | P56477 | Interferon regulatory factor 5                                                     | Irfs    | 1287 | 16  | 16  | 16   | 43.5 | 43.5 | 43.5   | 56.004  | 0.0000 | 80.705    | 33576000  | 293   | 15.63 | 15.79 | 16.31 | 16.44 | 16.61 | 16.27 | 16.37 |
| 1.385 | -0.59 | 0.67 | P11438 | Lysosome-associated membrane glycoprotein 1                                        | Lamp1   | 743  | 7   | 7   | 7    | 12.3 | 12.3 | 12.3   | 43.865  | 0.0000 | 90.118    | 8671600   |       |       |       |       |       |       |       |       |

|       |       |      |        |                                                                                |           |       |    |    |    |      |      |      |        |        |         |          |      |       |       |       |       |       |       |       |
|-------|-------|------|--------|--------------------------------------------------------------------------------|-----------|-------|----|----|----|------|------|------|--------|--------|---------|----------|------|-------|-------|-------|-------|-------|-------|-------|
| 1.320 | -0.62 | 0.65 | P26231 | Catenin alpha-1                                                                | Ctnna1    | 920   | 24 | 24 | 22 | 43   | 43   | 39.2 | 100.11 | 0.0000 | 260.51  | 20505000 | 210  | 14.69 | 14.76 | 15.23 | 15.39 | 15.67 | 15.13 | 15.67 |
| 1.433 | -0.62 | 0.65 | Q5RJ01 | Nucleolar protein 10                                                           | Nol10     | 2126  | 6  | 6  | 6  | 13.1 | 13.1 | 13.1 | 80.076 | 0.0000 | 12.482  | 5331500  | 69   | 13.70 | 14.08 | 14.31 | 14.25 | 14.88 | 14.71 | 14.75 |
| 1.114 | -0.62 | 0.65 | Q3V4B5 | COMM domain-containing protein 6                                               | Comm6     | 2055  | 6  | 6  | 6  | 70.1 | 70.1 | 70.1 | 9.7951 | 0.0000 | 11.749  | 8567300  | 41   | 15.08 | 14.50 | 15.42 | 15.27 | 15.55 | 15.91 | 15.75 |
| 0.465 | -0.62 | 0.65 | P30285 | Cyclin-dependent kinase 4                                                      | Cdk4      | 976   | 3  | 2  | 2  | 11.6 | 8.9  | 8.9  | 33.75  | 0.0000 | 14.521  | 1412500  | 25   | 13.13 | 12.69 | 13.15 | 12.89 | 14.36 | 12.65 | 14.54 |
| 1.524 | -0.62 | 0.65 | Q9B9N2 | Cytoplasmic P450 4V2                                                           | Cyp4v2    | 51936 | 15 | 15 | 15 | 36.2 | 36.2 | 36.2 | 71.145 | 0.0000 | 15.2    | 1873600  | 171  | 15.52 | 15.67 | 15.71 | 15.37 | 15.67 | 15.27 | 15.88 |
| 0.846 | -0.62 | 0.65 | Q8C8A4 | Vacuolar protein sorting-associated protein 53 homolog                         | Vps53     | 9435  | 16 | 16 | 16 | 24.8 | 24.8 | 24.8 | 94.422 | 0.0000 | 65.235  | 18697000 | 96   | 16.24 | 16.09 | 16.11 | 16.68 | 16.74 | 16.83 | 16.83 |
| 1.214 | -0.62 | 0.65 | Q9CQA6 | Coiled-coil-helix-coiled-coil-helix domain-containing protein 1                | Chchd1    | 4579  | 2  | 2  | 2  | 16.1 | 16.1 | 16.1 | 13.608 | 0.0000 | 66.402  | 13143000 | 67   | 16.05 | 16.70 | 16.50 | 17.27 | 16.53 | 17.16 | 17.18 |
| 2.204 | -0.62 | 0.65 | Q8BR11 | CLIP-associated protein 2                                                      | Clasp2    | 3184  | 30 | 30 | 28 | 29   | 29   | 28.7 | 140.74 | 0.0000 | 246.69  | 42683000 | 464  | 15.50 | 15.22 | 15.51 | 15.87 | 16.11 | 15.89 | 16.25 |
| 1.701 | -0.62 | 0.65 | Q8BT54 | Nuclear pore complex protein Nup54                                             | Nup54     | 3205  | 9  | 9  | 9  | 25.9 | 25.9 | 25.9 | 55.731 | 0.0000 | 47.696  | 9413400  | 143  | 14.76 | 14.82 | 14.98 | 15.81 | 15.63 | 15.34 | 15.13 |
| 1.622 | -0.62 | 0.65 | Q9Z2Y8 | Proline synthase co-transcribed bacterial homolog protein                      | Proac     | 5873  | 17 | 17 | 17 | 65   | 65   | 65   | 30.048 | 0.0000 | 126.8   | 13565000 | 463  | 16.16 | 18.26 | 18.78 | 18.78 | 19.27 | 18.69 | 19.11 |
| 1.008 | -0.63 | 0.65 | P45481 | CREB-binding protein                                                           | Crebpb    | 1096  | 5  | 4  | 4  | 2.8  | 2.8  | 2.8  | 265.49 | 0.0000 | 57.92   | 3150500  | 41   | 13.12 | 14.04 | 14.27 | 14.25 | 14.44 | 14.44 | 14.62 |
| 1.308 | -0.63 | 0.65 | Q8VD54 | Regulation of nuclear pre-mRNA nuclear domain-containing protein 1A            | Rprd1a    | 3970  | 2  | 2  | 2  | 10.9 | 10.9 | 10.9 | 35.7   | 0.0000 | 9.5828  | 1584400  | 35   | 13.20 | 13.40 | 13.40 | 13.61 | 13.95 | 13.47 | 14.33 |
| 1.427 | -0.63 | 0.65 | Q6JM14 | 533-deoxyribonucleoside, cytosolic type                                        | Ndc5      | 5497  | 8  | 8  | 8  | 94   | 94   | 94   | 23.076 | 0.0000 | 109.72  | 27120000 | 586  | 16.15 | 16.06 | 16.47 | 17.12 | 17.45 | 16.73 | 16.90 |
| 2.253 | -0.63 | 0.65 | Q8R190 | Metastasis-associated protein MTA2                                             | Mta2      | 5648  | 28 | 28 | 24 | 42.8 | 42.8 | 37.6 | 75.029 | 0.0000 | 23.1    | 7236500  | 580  | 15.54 | 16.62 | 17.04 | 17.35 | 17.35 | 17.34 | 17.61 |
| 3.051 | -0.63 | 0.65 | Q9CQW1 | Synaptobrevin homolog YKT6                                                     | Ykt6      | 4642  | 19 | 19 | 19 | 85.4 | 85.4 | 85.4 | 22.314 | 0.0000 | 262.84  | 32124000 | 231  | 16.56 | 16.45 | 16.31 | 17.08 | 17.21 | 17.00 | 16.97 |
| 2.159 | -0.63 | 0.65 | Q8R1R2 | Tripartite motif-containing protein 3                                          | Trim3     | 5660  | 7  | 7  | 7  | 16   | 16   | 16   | 80.774 | 0.0000 | 29.52   | 5068100  | 44   | 13.84 | 13.55 | 13.99 | 14.50 | 14.53 | 14.45 | 14.20 |
| 1.422 | -0.63 | 0.65 | Q8DVA0 | LEM domain-containing protein 2                                                | Lem2      | 2512  | 7  | 7  | 7  | 20.5 | 20.5 | 20.5 | 57.506 | 0.0000 | 37.6    | 17640000 | 119  | 15.83 | 15.69 | 15.29 | 16.04 | 15.95 | 16.32 | 16.62 |
| 0.704 | -0.63 | 0.65 | P35505 | Translation machinery-associated protein 7                                     | Tma7      | 3590  | 5  | 5  | 5  | 20   | 20   | 20   | 16.75  | 0.0000 | 10.364  | 2547100  | 16   | 13.21 | 13.16 | 13.16 | 14.43 | 14.41 | 13.11 | 13.25 |
| 0.307 | -0.63 | 0.65 | Q5U4D9 | THO complex subunit 6 homolog                                                  | Thoc6     | 2166  | 7  | 7  | 7  | 26.1 | 26.1 | 26.1 | 37.314 | 0.0000 | 52.323  | 6648900  | 58   | 14.08 | 14.47 | 14.78 | 15.94 | 16.10 | 13.03 | 15.22 |
| 0.551 | -0.63 | 0.65 | Q8QTA6 | Myotubularin-related protein 12                                                | Mtmr12    | 2800  | 13 | 13 | 13 | 24.5 | 24.5 | 24.5 | 85.515 | 0.0000 | 37.82   | 6398200  | 58   | 14.06 | 13.00 | 13.47 | 14.25 | 13.06 | 14.87 | 14.36 |
| 1.176 | -0.63 | 0.65 | Q8R1N0 | Zinc finger protein 830                                                        | Znf830    | 3792  | 3  | 3  | 3  | 16.3 | 16.3 | 16.3 | 40.658 | 0.0000 | 41.426  | 5862700  | 82   | 15.07 | 15.39 | 15.33 | 16.27 | 15.27 | 15.96 | 16.08 |
| 0.747 | -0.63 | 0.65 | Q8R003 | Fumarylacetoacetase                                                            | Fah       | 1023  | 5  | 5  | 5  | 20   | 20   | 20   | 46.175 | 0.0000 | 30.334  | 2547100  | 16   | 13.21 | 13.16 | 13.16 | 14.43 | 14.41 | 13.11 | 13.25 |
| 2.004 | -0.63 | 0.65 | Q8BT18 | Translation initiation factor eIF-2B subunit epsilon                           | Eif2b5    | 3533  | 29 | 29 | 29 | 14.4 | 14.4 | 14.4 | 294.84 | 0.0000 | 188.2   | 13673000 | 603  | 17.76 | 17.62 | 18.14 | 18.50 | 18.29 | 18.77 | 18.61 |
| 2.442 | -0.63 | 0.64 | Q8CHW4 | Sperm-specific antigen 2 homolog                                               | Ly2z      | 690   | 9  | 9  | 9  | 54.7 | 54.7 | 54.7 | 41.2   | 0.0000 | 210.75  | 49661000 | 487  | 20.54 | 20.90 | 21.22 | 21.61 | 21.51 | 21.31 | 21.65 |
| 1.164 | -0.63 | 0.64 | Q9Z2B9 | Serine/threonine-protein kinase SKT11                                          | Skt11     | 5677  | 3  | 3  | 3  | 11.4 | 11.4 | 11.4 | 18.562 | 0.0000 | 14.194  | 1785100  | 31   | 13.47 | 12.70 | 13.15 | 15.09 | 15.04 | 14.86 | 14.36 |
| 0.640 | -0.64 | 0.64 | Q8C0L6 | WAS protein family homolog 1                                                   | Wash1     | 3949  | 12 | 12 | 12 | 38.1 | 38.1 | 38.1 | 51.658 | 0.0000 | 98.808  | 1963600  | 186  | 15.77 | 15.86 | 16.06 | 16.09 | 16.70 | 16.75 | 16.59 |
| 1.152 | -0.64 | 0.64 | P61226 | Ras-related protein Rap-2b                                                     | Rap2b     | 1380  | 11 | 11 | 11 | 66.7 | 66.7 | 66.7 | 43.7   | 0.0000 | 323.31  | 64622000 | 288  | 17.89 | 18.01 | 17.61 | 18.16 | 19.02 | 18.08 | 18.64 |
| 1.822 | -0.64 | 0.64 | Q61771 | Kinesin-like protein KIF3B; kinesin-like protein KIF3B, N-terminally processed | Kif3b     | 2334  | 24 | 24 | 24 | 42.8 | 42.8 | 42.8 | 75.029 | 0.0000 | 23.1    | 4807500  | 443  | 16.41 | 16.52 | 16.93 | 16.93 | 17.16 | 16.83 | 16.83 |
| 1.350 | -0.64 | 0.64 | P62281 | 40S ribosomal protein S11                                                      | Rps11     | 1450  | 26 | 26 | 26 | 78.5 | 78.5 | 78.5 | 18.431 | 0.0000 | 39.028  | 57586000 | 1091 | 19.13 | 19.62 | 19.97 | 20.19 | 19.92 | 20.31 | 20.43 |
| 0.926 | -0.64 | 0.64 | Q70279 | Protein DGCR14                                                                 | Dgcr14    | 482   | 4  | 4  | 4  | 15   | 15   | 15   | 52.603 | 0.0000 | 56.808  | 4349200  | 85   | 14.47 | 14.93 | 14.43 | 15.61 | 14.47 | 15.39 | 15.52 |
| 1.424 | -0.64 | 0.64 | A2AIL4 | NADH dehydrogenase (ubiquinone) complex I, assembly factor 6                   | Ndufa6    | 24    | 3  | 3  | 3  | 11.4 | 11.4 | 11.4 | 38.362 | 0.0000 | 8.9271  | 1714600  | 22   | 13.01 | 12.82 | 13.05 | 13.66 | 13.37 | 13.26 | 14.09 |
| 1.457 | -0.64 | 0.64 | P91263 | 533-deoxyribonucleoside 1' diphosphatase 7 exclusion domain chain D            | Dnae1     | 167   | 6  | 6  | 6  | 16.7 | 16.7 | 16.7 | 52.376 | 0.0000 | 155.59  | 47981000 | 266  | 15.36 | 15.68 | 15.78 | 17.39 | 17.81 | 16.83 | 16.77 |
| 1.022 | -0.64 | 0.64 | Q62376 | U1 small nuclear ribonucleoprotein 70 kDa                                      | Snmp70    | 2382  | 23 | 23 | 23 | 45.3 | 45.3 | 45.3 | 51.991 | 0.0000 | 150.02  | 52438000 | 393  | 16.01 | 16.97 | 16.61 | 17.09 | 17.55 | 16.73 | 17.32 |
| 1.304 | -0.64 | 0.64 | Q14CH1 | Molybdenum cofactor sulfatase                                                  | Mocos     | 1789  | 32 | 32 | 32 | 54.9 | 54.9 | 54.9 | 95.012 | 0.0000 | 323.31  | 61334000 | 690  | 16.36 | 15.90 | 16.31 | 17.01 | 17.26 | 16.56 | 16.49 |
| 0.289 | -0.65 | 0.64 | E9Q735 | Ubiquitin conjugation factor E4 A                                              | Ube4a     | 344   | 8  | 8  | 8  | 14.2 | 14.2 | 14.2 | 118.2  | 0.0000 | 81.573  | 3920600  | 36   | 14.61 | 11.72 | 14.70 | 14.76 | 13.27 | 14.64 | 14.64 |
| 0.774 | -0.65 | 0.64 | O35411 | Apoptosis inhibitor 5                                                          | Aip5      | 472   | 27 | 27 | 27 | 47.2 | 47.2 | 47.2 | 76.781 | 0.0000 | 323.31  | 93651000 | 364  | 16.74 | 16.64 | 16.79 | 16.98 | 16.74 | 16.83 | 16.83 |
| 0.509 | -0.65 | 0.64 | Q8K200 | COMM domain-containing protein 9                                               | Comm9     | 2667  | 6  | 6  | 6  | 51   | 51   | 51   | 21.85  | 0.0000 | 54.234  | 11382000 | 117  | 15.39 | 15.45 | 15.51 | 16.13 | 16.12 | 16.10 | 16.04 |
| 1.179 | -0.65 | 0.64 | Q8R024 | Core-binding factor subunit beta                                               | Ctbf      | 1759  | 12 | 12 | 12 | 63.1 | 63.1 | 63.1 | 22.03  | 0.0000 | 35.838  | 11158000 | 109  | 15.24 | 15.37 | 14.88 | 15.75 | 16.37 | 15.77 | 15.36 |
| 1.117 | -0.65 | 0.64 | P15105 | Glutamine synthase                                                             | Gli1      | 790   | 8  | 8  | 8  | 23.1 | 23.1 | 23.1 | 42.119 | 0.0000 | 73.774  | 6942200  | 61   | 14.63 | 14.31 | 14.44 | 15.77 | 15.07 | 14.66 | 14.93 |
| 0.382 | -0.65 | 0.64 | P19324 | Serpin H1                                                                      | Serpinh1  | 846   | 3  | 3  | 3  | 11.8 | 11.8 | 11.8 | 46.533 | 0.0000 | 50.303  | 119400   | 35   | 14.05 | 12.96 | 12.35 | 13.37 | 13.84 | 15.13 | 12.74 |
| 0.643 | -0.65 | 0.64 | Q09167 | 60S ribosomal protein L21                                                      | Rpl21     | 86    | 18 | 18 | 18 | 70   | 70   | 70   | 18.562 | 0.0000 | 142.75  | 41076000 | 95   | 19.55 | 20.31 | 20.31 | 19.84 | 19.73 | 20.23 | 20.94 |
| 0.469 | -0.65 | 0.64 | P18608 | Non-Histone chromosomal protein HMG-14                                         | Hmg1      | 6     | 6  | 6  | 6  | 67.7 | 67.7 | 67.7 | 10.152 | 0.0000 | 10.639  | 9819800  | 83   | 14.27 | 16.49 | 15.35 | 16.05 | 15.31 | 16.19 | 16.53 |
| 2.843 | -0.65 | 0.64 | Q8R0G7 | Zinc finger E-box-binding homeobox 2                                           | Zeb2      | 5625  | 14 | 14 | 14 | 16.9 | 16.9 | 16.9 | 136.61 | 0.0000 | 89.856  | 13854000 | 200  | 14.67 | 14.73 | 14.95 | 15.38 | 15.62 | 15.36 | 15.38 |
| 1.031 | -0.65 | 0.64 | P08228 | Superoxide dismutase [Cu-Zn]                                                   | Sod1      | 683   | 11 | 11 | 11 | 54.5 | 54.5 | 54.5 | 15.942 | 0.0000 | 113.221 | 2628700  | 304  | 16.30 | 17.01 | 16.79 | 17.54 | 17.37 | 16.74 | 17.77 |
| 0.733 | -0.65 | 0.64 | E0C394 | Adaptin 3                                                                      | Adap3     | 13    | 13 | 13 | 13 | 9.5  | 9.5  | 9.5  | 303.97 | 0.0000 | 55.712  | 4231300  | 58   | 13.78 | 14.37 | 14.98 | 14.37 | 14.67 | 14.68 | 15.61 |
| 1.235 | -0.65 | 0.64 | Q8N8R7 | 28S ribosomal protein S5, mitochondrial                                        | Mps5      | 4487  | 10 | 10 | 10 | 20.1 | 20.1 | 20.1 | 48.206 | 0.0000 | 12.06   | 16080000 | 123  | 15.76 | 15.07 | 15.34 | 16.16 | 15.52 | 16.23 | 16.26 |
| 1.412 | -0.65 | 0.64 | Q8X0X3 | Eukaryotic translation initiation factor 4 gamma 3                             | Eif4g3    | 2881  | 18 | 14 | 14 | 12.5 | 9.6  | 9.6  | 174.89 | 0.0000 | 29.293  | 16765000 | 181  | 14.78 | 14.85 | 15.53 | 15.52 | 15.73 | 15.59 | 15.99 |
| 1.140 | -0.65 | 0.64 | Q8Z189 | U1 small nuclear ribonucleoprotein A                                           | Snra      | 2365  | 10 | 10 | 9  | 35.9 | 35.9 | 35.9 | 31.835 | 0.0000 | 31.416  | 27630000 | 184  | 16.44 | 16.78 | 17.16 | 17.24 | 18.02 | 17.19 | 17.92 |
| 1.618 | -0.66 | 0.63 | Q8R361 | Rab11 family-interacting protein 5                                             | Rab11fip5 | 3837  | 23 | 23 | 23 | 49.1 | 49.1 | 49.1 | 69.552 | 0.0000 | 22.68   | 46576000 | 180  | 15.92 | 16.12 | 16.68 | 16.70 | 17.07 | 16.69 | 17.04 |
| 1.177 | -0.66 | 0.63 | P25976 | Nuclear transcription factor 1                                                 | Ubf1      | 54    | 29 | 29 | 29 | 55.4 | 55.4 | 55.4 | 89.505 | 0.0000 | 129.12  | 40870000 | 356  | 15.12 | 15.98 | 15.98 | 16.06 | 16.39 | 16.39 | 16.68 |
| 1.516 | -0.66 | 0.63 | Q05CL8 | La-related protein 7                                                           | Larp7     | 1746  | 22 | 22 | 22 | 44.9 | 44.9 | 44.9 | 64.802 | 0.0000 | 56.633  | 23866000 | 182  | 15.66 | 15.90 | 15.87 | 16.35 | 16.05 | 16.55 | 16.90 |
| 0.540 | -0.66 |      |        |                                                                                |           |       |    |    |    |      |      |      |        |        |         |          |      |       |       |       |       |       |       |       |

|       |       |      |        |                                                                                  |          |      |    |    |      |      |      |        |        |         |            |      |       |       |       |       |       |       |       |
|-------|-------|------|--------|----------------------------------------------------------------------------------|----------|------|----|----|------|------|------|--------|--------|---------|------------|------|-------|-------|-------|-------|-------|-------|-------|
| 2.569 | -0.70 | 0.62 | P17742 | Peptidyl-prolyl cis-trans isomerase A:Peptidyl-prolyl cis-trans isomerase A-Ppia | 829      | 24   | 24 | 9  | 95.7 | 95.7 | 43.3 | 17.971 | 0.0000 | 323.31  | 4129500000 | 3245 | 22.02 | 22.36 | 22.15 | 23.10 | 22.88 | 22.73 | 22.80 |
| 0.846 | -0.70 | 0.61 | P97478 | 5-demethoxyubiquinone hydroxylase, mitochondrial                                 | Coq7     | 1659 | 7  | 7  | 33.2 | 33.2 | 33.2 | 24.041 | 0.0000 | 36.956  | 17578000   | 97   | 14.97 | 15.16 | 16.35 | 16.51 | 15.79 | 16.27 | 16.20 |
| 3.026 | -0.70 | 0.61 | Q8R151 | NFX1-type zinc finger-containing protein 1                                       | Znfx1    | 3778 | 43 | 43 | 25.8 | 25.8 | 25.8 | 218.83 | 0.0000 | 305.67  | 37743000   | 424  | 14.62 | 14.45 | 14.76 | 15.45 | 15.36 | 15.19 | 15.25 |
| 3.788 | -0.70 | 0.61 | Q8C150 | POZ and LIM domain protein 5                                                     | Pdim5    | 3540 | 26 | 26 | 26   | 49.7 | 49.7 | 63.299 | 0.0000 | 280.4   | 150810000  | 718  | 17.84 | 17.90 | 18.09 | 18.63 | 18.72 | 18.61 | 18.62 |
| 1.956 | -0.70 | 0.61 | Q8Q448 | 39S ribosomal protein L24, mitochondrial                                         | L24p2    | 2392 | 32 | 32 | 42.6 | 42.6 | 42.6 | 102.1  | 0.0000 | 323.31  | 1150700000 | 789  | 17.61 | 17.70 | 17.81 | 17.86 | 17.86 | 17.86 | 17.87 |
| 1.128 | -0.70 | 0.61 | Q8CR80 | Protein FAM32A                                                                   | Fam32a   | 4680 | 8  | 8  | 8    | 57.1 | 57.1 | 13.215 | 0.0000 | 16.478  | 4103100    | 31   | 13.39 | 13.47 | 13.65 | 13.91 | 14.32 | 13.72 | 14.88 |
| 3.634 | -0.70 | 0.61 | Q3TDD9 | Protein phosphatase 1 regulatory subunit 21                                      | Ppp1r21  | 1831 | 41 | 41 | 41   | 67.1 | 67.1 | 88.337 | 0.0000 | 323.31  | 1155800000 | 743  | 16.95 | 16.88 | 17.09 | 17.56 | 17.68 | 17.68 | 17.80 |
| 1.803 | -0.71 | 0.61 | P39749 | Flap endonuclease 1                                                              | Fen1     | 1055 | 18 | 18 | 18   | 48.4 | 48.4 | 42.314 | 0.0000 | 149.3   | 82708000   | 419  | 16.85 | 17.19 | 17.22 | 17.52 | 18.19 | 17.67 | 17.81 |
| 1.063 | -0.71 | 0.61 | P51949 | CDK-activating kinase assembly factor MAT1                                       | Mnat1    | 1211 | 6  | 6  | 6    | 26.9 | 26.9 | 35.848 | 0.0000 | 17.264  | 27426000   | 42   | 13.55 | 14.12 | 14.88 | 14.69 | 13.75 | 14.44 |       |
| 1.512 | -0.71 | 0.61 | Q8QCM9 | Glutaredoxin-3                                                                   | Gltc3    | 4613 | 16 | 16 | 17   | 60.2 | 60.2 | 37.778 | 0.0000 | 232.42  | 62574000   | 478  | 16.19 | 17.32 | 17.12 | 17.65 | 19.19 | 17.45 | 17.67 |
| 2.437 | -0.71 | 0.61 | Q02105 | Complement C1q subcomponent subunit C                                            | C1qc     | 1716 | 6  | 6  | 6    | 29.7 | 29.7 | 25.991 | 0.0000 | 26.581  | 34675000   | 128  | 17.12 | 16.68 | 16.92 | 17.93 | 17.56 | 17.75 | 17.47 |
| 1.004 | -0.71 | 0.61 | Q0QX45 | U6 snRNA-associated Sm-like protein LSM4                                         | Lsm4     | 4533 | 11 | 11 | 11   | 58.4 | 58.4 | 15.076 | 0.0000 | 56.37   | 52565000   | 273  | 16.09 | 16.79 | 17.30 | 17.71 | 17.47 | 17.40 | 17.13 |
| 2.347 | -0.71 | 0.61 | Q9C0T2 | RNA-binding protein                                                              | Rbm7     | 5634 | 8  | 8  | 8    | 47.2 | 47.2 | 30.148 | 0.0000 | 116.61  | 29733000   | 199  | 16.35 | 16.41 | 16.63 | 17.03 | 16.95 | 17.36 | 17.35 |
| 0.912 | -0.71 | 0.61 | Q9DB15 | 39S ribosomal protein L12, mitochondrial                                         | L12p12   | 5118 | 9  | 9  | 9    | 60.7 | 60.7 | 21.708 | 0.0000 | 109.92  | 11598000   | 140  | 14.89 | 15.13 | 15.98 | 16.51 | 15.26 | 16.28 | 15.61 |
| 1.549 | -0.71 | 0.61 | Q8R310 | Transmembrane and coiled-coil domains protein 3                                  | Tmcc3    | 3828 | 5  | 5  | 5    | 14   | 14   | 53.721 | 0.0000 | 9.7722  | 2756200    | 30   | 13.05 | 12.52 | 13.26 | 13.47 | 13.70 | 13.48 | 13.99 |
| 1.364 | -0.71 | 0.61 | Q9D0R8 | Protein LSM12 homolog                                                            | Lsm12    | 4885 | 6  | 6  | 6    | 32.8 | 32.8 | 21.701 | 0.0000 | 16.33   | 15610000   | 123  | 15.82 | 15.99 | 16.24 | 17.32 | 16.41 | 16.47 | 16.72 |
| 0.554 | -0.71 | 0.61 | Q3U6N9 | UPF0488 protein Cborf33 homolog                                                  | Cbo3     | 1929 | 3  | 3  | 3    | 22.1 | 22.1 | 24.464 | 0.0000 | 9.6909  | 1706600    | 21   | 11.90 | 12.86 | 13.19 | 13.98 | 12.16 | 13.51 | 13.81 |
| 1.943 | -0.71 | 0.61 | Q9D2R6 | Cytochrome c oxidase assembly factor 3 homolog, mitochondrial                    | Cox3     | 4950 | 5  | 5  | 5    | 40.7 | 40.7 | 11.987 | 0.0000 | 21.38   | 13056000   | 68   | 16.12 | 16.01 | 16.28 | 16.88 | 16.62 | 16.86 | 17.26 |
| 1.950 | -0.72 | 0.61 | Q8VE88 | Protein FAM114A2                                                                 | Fam114a2 | 3990 | 6  | 6  | 6    | 19.7 | 19.7 | 54.044 | 0.0000 | 104.97  | 10599000   | 162  | 14.37 | 14.51 | 14.72 | 15.45 | 15.07 | 14.96 | 15.51 |
| 0.315 | -0.72 | 0.61 | Q9QZ15 | C-type lectin domain family 4 member A                                           | Clec4a   | 5585 | 3  | 3  | 3    | 15.5 | 15.5 | 27.323 | 0.0000 | 56.048  | 6187300    | 46   | 12.51 | 13.00 | 14.60 | 15.11 | 14.02 | 15.00 | 12.23 |
| 1.316 | -0.72 | 0.61 | Q8BJF9 | Charged multivesicular body protein 2b                                           | Chmp2b   | 1788 | 13 | 12 | 12   | 42.3 | 42.3 | 23.934 | 0.0000 | 40.87   | 38045000   | 185  | 16.78 | 16.98 | 16.86 | 18.16 | 17.04 | 17.63 | 17.55 |
| 1.478 | -0.72 | 0.61 | P82897 | Cytochrome c, somatic                                                            | Cytc     | 1465 | 14 | 14 | 8    | 67.6 | 67.6 | 41     | 0.0000 | 172.43  | 5913000    | 289  | 18.18 | 16.69 | 16.85 | 17.53 | 16.94 | 17.13 | 17.56 |
| 1.228 | -0.72 | 0.61 | Q9Z0H7 | B-cell lymphoma/leukemia 10                                                      | Bcl10    | 5772 | 4  | 4  | 4    | 35.2 | 35.2 | 24.5   | 0.0000 | 6.5683  | 2346100    | 28   | 13.10 | 13.28 | 13.22 | 14.11 | 14.52 | 13.58 | 13.45 |
| 1.101 | -0.72 | 0.61 | Q9CQP0 | 39S ribosomal protein L33, mitochondrial                                         | L33p33   | 4618 | 4  | 4  | 4    | 53.8 | 53.8 | 7.4158 | 0.0000 | 7.3798  | 6960300    | 80   | 14.34 | 14.88 | 15.54 | 15.72 | 15.27 | 15.70 | 15.86 |
| 5.519 | -0.72 | 0.61 | Q9QY06 | Unconventional myosin-Ikb                                                        | Myoib    | 5558 | 56 | 56 | 54   | 33.5 | 33.5 | 33.1   | 0.0000 | 261.52  | 74847000   | 651  | 15.97 | 15.94 | 15.91 | 16.62 | 16.62 | 16.66 | 16.67 |
| 1.140 | -0.72 | 0.61 | Q3UDK1 | RAF-type zinc finger domain-containing protein 1                                 | Traf1    | 1946 | 7  | 7  | 7    | 15.7 | 15.7 | 64.282 | 0.0000 | 22.342  | 62087000   | 78   | 14.88 | 15.32 | 15.20 | 15.32 | 15.20 | 14.47 | 14.86 |
| 4.550 | -0.72 | 0.61 | Q9CJ05 | Elongation factor Tu GTP-binding domain-containing protein 1                     | Elf1a1   | 3332 | 15 | 15 | 15   | 17.7 | 17.7 | 12.787 | 0.0000 | 59.071  | 15644000   | 166  | 14.77 | 14.60 | 14.87 | 15.62 | 15.80 | 15.87 | 15.47 |
| 2.098 | -0.72 | 0.61 | P49282 | Natural resistance-associated macrophage protein 2                               | Slc11a2  | 1157 | 2  | 2  | 2    | 9    | 9    | 62.367 | 0.0000 | 35.014  | 3859200    | 37   | 15.23 | 15.27 | 12.06 | 15.69 | 14.39 | 15.44 | 14.11 |
| 2.168 | -0.72 | 0.61 | Q9D0C7 | cAMP-dependent protein kinase type I-alpha regulatory subunit;cAMP-depPrkar1a    | Prkar1a  | 5143 | 27 | 27 | 20   | 60.9 | 60.9 | 49.3   | 0.0000 | 218.86  | 17473000   | 827  | 17.50 | 17.79 | 18.09 | 18.65 | 18.34 | 18.49 | 18.58 |
| 1.280 | -0.72 | 0.61 | Q8R0A0 | General transcription factor IIF subunit 2                                       | Gtlf2    | 3753 | 13 | 13 | 13   | 52.6 | 52.6 | 28.381 | 0.0000 | 215.02  | 69184000   | 383  | 17.20 | 17.71 | 17.78 | 18.60 | 17.67 | 18.48 | 18.39 |
| 2.845 | -0.72 | 0.61 | Q8Z6H2 | Hexameric phosphatase and diphosphoinositol-pentakisphosphate kinase             | Phosph2  | 2694 | 18 | 18 | 14   | 19.8 | 19.8 | 128.43 | 0.0000 | 123.18  | 16384000   | 231  | 15.42 | 16.01 | 14.68 | 16.45 | 16.22 | 16.45 | 16.45 |
| 2.135 | -0.72 | 0.61 | Q6A026 | Sister chromatid cohesion protein PDS5 homolog A                                 | Pds5a    | 2495 | 33 | 33 | 33   | 37.5 | 37.5 | 150.33 | 0.0000 | 332.01  | 68400000   | 663  | 16.22 | 16.22 | 16.45 | 16.74 | 17.19 | 16.87 | 17.29 |
| 2.355 | -0.72 | 0.61 | B2RUP2 | Protein unc-13 homolog D                                                         | Unc13d   | 80   | 16 | 16 | 16   | 21   | 21   | 123.12 | 0.0000 | 73.081  | 25492000   | 191  | 16.54 | 16.43 | 16.81 | 17.09 | 17.54 | 17.40 | 17.25 |
| 2.594 | -0.72 | 0.61 | Q8BUJ7 | RUN and FYVE domain-containing protein 1                                         | Rufy1    | 3062 | 34 | 34 | 31   | 47.2 | 47.2 | 46.2   | 0.0000 | 178.89  | 71223000   | 655  | 16.22 | 16.00 | 16.42 | 16.98 | 17.63 | 17.02 | 17.02 |
| 1.098 | -0.73 | 0.60 | Q9U130 | Nucleic-acid-interacting protein                                                 | Ntic2ip  | 325  | 4  | 4  | 4    | 18.9 | 18.9 | 45.121 | 0.0000 | 98.7263 | 91300      | 54   | 13.93 | 14.93 | 14.68 | 14.91 | 16.33 | 14.98 | 14.68 |
| 1.103 | -0.73 | 0.60 | Q6A012 | RNA-binding protein Raly                                                         | Raly     | 2412 | 25 | 25 | 25   | 56.4 | 56.4 | 33.188 | 0.0000 | 227.4   | 89783000   | 404  | 16.61 | 17.06 | 17.41 | 17.41 | 18.42 | 17.56 | 17.63 |
| 2.754 | -0.73 | 0.60 | Q9CQ58 | Protein transport protein Sec61 subunit beta                                     | Sec61b   | 4630 | 3  | 3  | 3    | 37.5 | 37.5 | 9.9583 | 0.0000 | 11.734  | 28652000   | 125  | 17.53 | 17.56 | 17.38 | 18.31 | 18.23 | 18.39 | 17.95 |
| 2.103 | -0.73 | 0.60 | Q8UAC3 | Splicing factor, arginine/serine-rich 19                                         | Scaf1    | 2165 | 5  | 5  | 5    | 5.4  | 5.4  | 133.84 | 0.0000 | 8.8992  | 40772000   | 9    | 17.71 | 18.34 | 18.02 | 18.74 | 18.61 | 18.74 | 18.94 |
| 2.219 | -0.73 | 0.60 | P27659 | 39S ribosomal protein L3                                                         | L3p3     | 4618 | 45 | 45 | 45   | 64.5 | 64.5 | 46.109 | 0.0000 | 323.31  | 549520000  | 164  | 16.45 | 16.86 | 16.74 | 16.96 | 16.86 | 16.86 | 16.86 |
| 1.273 | -0.74 | 0.60 | Q6O631 | Growth factor receptor-bound protein 2                                           | Grb2     | 1968 | 22 | 22 | 22   | 94.5 | 94.5 | 25.238 | 0.0000 | 120.19  | 28312000   | 277  | 15.15 | 15.83 | 15.77 | 16.27 | 16.44 | 15.82 | 16.74 |
| 2.481 | -0.74 | 0.60 | Q61191 | Host cell factor 1;HCF N-terminal chain 1;HCF N-terminal chain 2;HCF N-Hcfc1     | Hcfc1    | 2272 | 38 | 38 | 38   | 27.3 | 27.3 | 210.43 | 0.0000 | 286.01  | 103050000  | 694  | 16.75 | 16.95 | 17.14 | 17.70 | 17.44 | 17.87 | 17.70 |
| 0.969 | -0.74 | 0.60 | Q3ULW8 | Parp3                                                                            | Parp3    | 1994 | 16 | 16 | 16   | 37.7 | 37.7 | 99.948 | 0.0000 | 98.377  | 14129000   | 121  | 14.60 | 14.45 | 14.38 | 15.31 | 15.74 | 15.50 | 14.31 |
| 1.233 | -0.74 | 0.60 | Q7TMF3 | NADH dehydrogenase [ubiquinone] 1 alpha subcomplex subunit 12                    | Ndufa12  | 2743 | 13 | 13 | 13   | 88.3 | 88.3 | 17.086 | 0.0000 | 80.009  | 64188000   | 360  | 17.06 | 17.55 | 18.04 | 18.09 | 18.72 | 17.99 | 18.35 |
| 3.081 | -0.74 | 0.60 | P61957 | Small ubiquitin-related modifier 2                                               | Sumo2    | 1391 | 3  | 3  | 3    | 33.7 | 33.7 | 10.871 | 0.0000 | 14.2    | 44107000   | 92   | 17.87 | 17.97 | 18.02 | 18.52 | 18.76 | 18.81 | 18.47 |
| 2.324 | -0.74 | 0.60 | Q6A433 | Small ubiquitin-related modifier 1                                               | Hispe1   | 2441 | 15 | 15 | 15   | 99   | 99   | 10.963 | 0.0000 | 56.879  | 58071000   | 331  | 17.31 | 17.67 | 17.45 | 18.29 | 17.88 | 17.13 | 18.48 |
| 0.875 | -0.74 | 0.60 | Q3UDW8 | Heparan-alpha-glucosaminide N-acetyltransferase                                  | Hgsnat   | 1951 | 5  | 5  | 5    | 9.3  | 9.3  | 72.503 | 0.0000 | 71.434  | 6327600    | 75   | 15.04 | 15.07 | 13.79 | 15.55 | 15.77 | 15.24 | 14.93 |
| 3.190 | -0.74 | 0.60 | B2RRF7 | OTU domain-containing protein 4                                                  | Otu4     | 1951 | 7  | 7  | 7    | 9.4  | 9.4  | 62.7   | 0.0000 | 16.01   | 3997700    | 71   | 13.68 | 13.80 | 13.85 | 14.44 | 14.41 | 14.74 | 14.49 |
| 1.299 | -0.75 | 0.60 | Q3G562 | 1-acyl-sn-glycerol-3-phosphate acyltransferase alpha                             | Agpat1   | 334  | 4  | 4  | 4    | 21.4 | 21.4 | 31.709 | 0.0000 | 81.267  | 24370000   | 142  | 17.16 | 16.94 | 16.76 | 17.47 | 16.80 | 17.43 | 17.51 |
| 0.328 | -0.75 | 0.60 | Q9Q903 | Probable rRNA-processing protein EBP2                                            | Ebn1p2   | 5088 | 11 | 11 | 11   | 42.2 | 42.2 | 34.702 | 0.0000 | 46.853  | 7782000    | 64   | 12.96 | 14.49 | 15.01 | 13.86 | 13.63 | 15.75 | 16.36 |
| 2.244 | -0.75 | 0.59 | Q501J6 | Probable ATP-dependent RNA helicase DDX17                                        | Ddx17    | 2075 | 48 | 36 | 36   | 54.8 | 54.8 | 72.399 | 0.0000 | 323.31  | 175920000  | 970  | 17.09 | 17.66 | 17.58 | 18.15 | 18.31 | 18.06 | 18.24 |
| 0.539 | -0.75 | 0.59 | Q499X9 | Methionine--RNA ligase, mitochondrial                                            | Mars2    | 2056 | 6  | 6  | 6    | 15   | 15   | 65.804 | 0.0000 | 28.839  | 2882600    | 52   | 13.73 | 12.62 | 13.14 | 12.98 | 13.34 | 15.15 | 14.19 |
| 2.074 | -0.75 | 0.59 | P45879 | Peptidyl-prolyl cis-trans isomerase FKBP2                                        | Pfkb2    | 1099 | 33 | 33 | 33   | 14.3 | 14.3 | 15.344 | 0.0000 | 10.835  | 13865000   | 66   | 16.34 | 15.93 | 15.98 | 17.66 | 17.39 | 17.35 | 17.46 |
| 0.979 | -0.75 | 0.59 | Q9Q2D5 | WW domain-binding protein 11                                                     | Wtpp11   | 425  | 22 | 22 | 22   | 29.5 | 29.5 | 69.874 |        |         |            |      |       |       |       |       |       |       |       |

|       |       |                |                                                                                             |             |       |      |    |    |      |      |      |        |        |          |           |       |       |       |       |       |       |       |       |
|-------|-------|----------------|---------------------------------------------------------------------------------------------|-------------|-------|------|----|----|------|------|------|--------|--------|----------|-----------|-------|-------|-------|-------|-------|-------|-------|-------|
| 2.379 | -0.80 | 0.57 P14148    | 60S ribosomal protein L7                                                                    | Rpl7        | 775   | 31   | 31 | 31 | 61.5 | 61.5 | 61.5 | 31.419 | 0.0000 | 141.86   | 424640000 | 881   | 18.99 | 19.21 | 19.20 | 19.75 | 19.77 | 19.93 | 20.30 |
| 2.282 | -0.80 | 0.57 Q8BL66    | Early endosome antigen 1                                                                    | Eaa1        | 3110  | 65   | 65 | 65 | 51   | 51   | 51   | 160.91 | 0.0000 | 323.31   | 70811000  | 828   | 15.31 | 15.09 | 15.31 | 16.25 | 15.67 | 16.23 | 16.00 |
| 1.185 | -0.81 | 0.57 Q9JH41    | Ribonuclease P protein subunit p25-like protein                                             | Rpp25       | 4339  | 6    | 6  | 6  | 46   | 46   | 46   | 17.675 | 0.0000 | 50.982   | 15989000  | 137   | 15.17 | 15.75 | 16.27 | 16.16 | 16.91 | 16.29 | 16.77 |
| 0.800 | -0.81 | 0.57 P47962    | 60S ribosomal protein L5                                                                    | Rpl5        | 67    | 1134 | 35 | 35 | 67   | 67   | 67   | 34.4   | 0.0000 | 323.31   | 459820000 | 1555  | 16.27 | 18.48 | 16.75 | 18.99 | 19.33 | 19.68 | 19.54 |
| 0.666 | -0.81 | 0.57 Q9CR76    | Transmembrane protein 186                                                                   | Tmem186     | 46.57 | 2    | 2  | 2  | 13   | 13   | 13   | 9.374  | 0.0000 | 10.18300 | 14        | 12.85 | 12.42 | 12.42 | 13.71 | 13.38 | 14.14 | 14.14 |       |
| 1.387 | -0.81 | 0.57 P62320    | Small nuclear ribonucleoprotein Sm D3                                                       | Snrdp3      | 2     | 13   | 9  | 9  | 58.7 | 58.7 | 58.7 | 13.916 | 0.0000 | 143.76   | 117300000 | 339   | 17.98 | 18.97 | 18.71 | 19.51 | 18.95 | 19.43 | 19.56 |
| 1.491 | -0.81 | 0.57 Q9QZ58    | LA-related protein 1                                                                        | Larp1       | 1420  | 13   | 13 | 13 | 20   | 20   | 20   | 12.12  | 0.0000 | 72.931   | 8170000   | 76    | 14.42 | 14.35 | 14.67 | 14.71 | 15.19 | 15.55 | 15.73 |
| 0.871 | -0.81 | 0.57 Q9CRO2    | Translation machinery-associated protein 16                                                 | Tma16       | 28    | 7    | 7  | 7  | 46.4 | 46.4 | 46.4 | 25.763 | 0.0000 | 23.363   | 7083000   | 28    | 14.14 | 14.24 | 14.14 | 14.59 | 14.59 | 14.59 | 14.59 |
| 1.221 | -0.82 | 0.57 Q9CPJ4    | Nuclear factor related to kappa-B-binding protein                                           | Nfkfb       | 26455 | 12   | 12 | 12 | 14.5 | 14.5 | 14.5 | 10.876 | 0.0000 | 50.446   | 7526700   | 85    | 13.63 | 13.93 | 14.40 | 14.93 | 14.00 | 14.84 | 14.63 |
| 1.398 | -0.82 | 0.57 Q9CQV4    | Mitochondrial import inner membrane translocase subunit TIM16                               | Pam16       | 4636  | 10   | 10 | 10 | 60.8 | 60.8 | 60.8 | 13.784 | 0.0000 | 32.331   | 25825000  | 147   | 16.06 | 16.42 | 16.89 | 16.94 | 17.63 | 16.98 | 17.55 |
| 1.920 | -0.82 | 0.57 P48428    | Tubulin-specific chaperone A                                                                | Tbca        | 2144  | 7    | 7  | 7  | 70.4 | 70.4 | 70.4 | 12.758 | 0.0000 | 57.961   | 18740000  | 146   | 15.34 | 15.87 | 16.00 | 16.76 | 16.53 | 16.28 | 16.68 |
| 2.002 | -0.82 | 0.57 Q6T733    | 28S ribosomal protein S31, mitochondrial                                                    | Mpsr31      | 3328  | 15   | 15 | 15 | 37.5 | 37.5 | 37.5 | 43.88  | 0.0000 | 177.21   | 26270000  | 313   | 15.70 | 15.83 | 16.32 | 16.80 | 16.68 | 16.58 | 17.03 |
| 1.597 | -0.82 | 0.57 Q9C0E7    | Lipo L1 protein homolog                                                                     | Lip1        | 9057  | 22   | 22 | 22 | 62.7 | 62.7 | 62.7 | 17.759 | 0.0000 | 198.055  | 118300000 | 749   | 16.01 | 16.89 | 17.68 | 17.74 | 17.62 | 17.57 | 17.96 |
| 0.594 | -0.82 | 0.56 P63242Q8B | Eukaryotic translation initiation factor 5A-1,Eukaryotic translation initiation factor 5A-2 | Eif5aEif5a2 | 14977 | 13   | 13 | 13 | 77.3 | 77.3 | 77.3 | 16.832 | 0.0000 | 216.41   | 45973000  | 292   | 15.35 | 15.71 | 17.38 | 17.74 | 17.62 | 17.07 | 17.96 |
| 2.533 | -0.83 | 0.56 Q9VE99    | Coiled-coil domain-containing protein 11A                                                   | Cocd11A     | 34996 | 14   | 14 | 14 | 81.1 | 81.1 | 81.1 | 18.742 | 0.0000 | 119.72   | 52912000  | 341   | 16.62 | 16.94 | 17.01 | 17.85 | 17.40 | 17.76 | 17.73 |
| 2.443 | -0.83 | 0.56 Q9OZT1    | Acetyl-CoA synthyltransferase, mitochondrial                                                | Acat1       | 3785  | 31   | 31 | 31 | 72.4 | 72.4 | 72.4 | 44.816 | 0.0000 | 323.31   | 264330000 | 881   | 18.38 | 18.47 | 19.04 | 19.57 | 19.57 | 19.50 | 19.53 |
| 2.240 | -0.83 | 0.56 Q9C3R1    | SRCA1-associated AT domain                                                                  | Brst1       | 3373  | 8    | 8  | 8  | 8.8  | 8.8  | 8.8  | 38.496 | 0.0000 | 25.0400  | 2504000   | 81    | 13.41 | 13.33 | 13.11 | 13.69 | 13.44 | 13.52 | 13.69 |
| 1.733 | -0.83 | 0.56 Q9CE37    | Regulator of chromosome condensation                                                        | Roc1        | 3985  | 14   | 14 | 14 | 53   | 53   | 53   | 49.3   | 0.0000 | 323.31   | 423340000 | 279   | 16.56 | 16.93 | 17.13 | 17.36 | 17.92 | 17.50 | 18.06 |
| 2.873 | -0.83 | 0.56 Q9QZ63    | Peptidyl-prolyl cis-trans isomerase E                                                       | Ppie        | 5597  | 4    | 4  | 4  | 15   | 15   | 15   | 33.448 | 0.0000 | 4.5204   | 2060600   | 39    | 13.29 | 13.28 | 13.52 | 14.17 | 14.07 | 14.07 | 14.74 |
| 1.892 | -0.83 | 0.56 Q9D6H7    | Magnesium-dependent phosphatase 1                                                           | Mdp1        | 5097  | 7    | 7  | 7  | 61.6 | 61.6 | 61.6 | 18.582 | 0.0000 | 254.74   | 18676000  | 188   | 16.00 | 16.05 | 16.68 | 17.43 | 16.68 | 16.75 | 16.64 |
| 2.093 | -0.83 | 0.56 Q9JUK5    | Nucleolar RNA helicase                                                                      | Pycr1       | 5403  | 31   | 31 | 31 | 36.1 | 36.1 | 36.1 | 33.456 | 0.0000 | 189.68   | 70760000  | 635   | 16.73 | 16.11 | 16.11 | 16.73 | 16.73 | 16.73 | 16.73 |
| 2.864 | -0.84 | 0.56 Q9Q2Q4    | Pyruvate-S-carboxylate reductase 2                                                          | Pycr2       | 4299  | 14   | 14 | 14 | 45.3 | 45.3 | 45.3 | 33.659 | 0.0000 | 62.447   | 52523000  | 351   | 16.28 | 16.24 | 16.22 | 17.26 | 17.27 | 17.03 | 16.79 |
| 1.960 | -0.84 | 0.56 A2JAI8    | Taperin                                                                                     | Tpn         | 23    | 4    | 4  | 4  | 9.1  | 9.1  | 9.1  | 80.088 | 0.0000 | 12.324   | 2968800   | 25    | 13.32 | 13.44 | 13.69 | 13.87 | 14.30 | 14.39 | 14.72 |
| 0.877 | -0.84 | 0.56 Q9Q2K7    | Protein 28B (RNA (cytosolic-C(5))-methyltransferase                                         | Nop2a       | 4262  | 12   | 12 | 12 | 18   | 18   | 18   | 86.751 | 0.0000 | 59.288   | 11866000  | 138   | 14.57 | 15.20 | 14.81 | 15.64 | 14.67 | 16.16 | 16.33 |
| 0.779 | -0.84 | 0.56 Q9FQK6    | Pre-mRNA-splicing factor 3BA                                                                | Pf3ba       | 2057  | 5    | 5  | 5  | 16   | 16   | 16   | 27.436 | 0.0000 | 28.254   | 7012200   | 58    | 13.79 | 14.40 | 14.79 | 15.45 | 15.45 | 15.45 | 15.45 |
| 1.161 | -0.84 | 0.56 Q9JVE6    | MK167 FHA domain-interacting nuclear phosphoprotein                                         | Nlk         | 4059  | 8    | 8  | 8  | 39.4 | 39.4 | 39.4 | 36.265 | 0.0000 | 50.679   | 21264000  | 141   | 14.89 | 15.77 | 15.72 | 16.31 | 15.67 | 16.43 | 16.79 |
| 2.352 | -0.84 | 0.56 Q8BVY0    | Ribosomal L1 domain-containing protein 1                                                    | Ral1d1      | 3251  | 16   | 16 | 16 | 16   | 16   | 16   | 50.421 | 0.0000 | 226.52   | 35053000  | 173   | 16.09 | 16.21 | 16.36 | 16.85 | 16.82 | 17.23 | 17.34 |
| 2.739 | -0.84 | 0.56 Q9QZ38    | Peptidodupium-enriched atypical kinase 1                                                    | Peak1       | 2479  | 18   | 18 | 18 | 37.8 | 37.8 | 37.8 | 14.6   | 0.0000 | 36.037   | 10039000  | 99    | 13.35 | 13.41 | 13.65 | 14.28 | 14.09 | 14.57 | 14.32 |
| 1.147 | -0.83 | 0.56 Q9EQN3    | TSC2 domain family protein 1                                                                | Tsc2d4      | 5234  | 17   | 17 | 17 | 17.1 | 17.1 | 17.1 | 30.978 | 0.0000 | 14.038   | 5105200   | 58    | 13.07 | 13.87 | 14.37 | 14.58 | 14.58 | 14.58 | 14.58 |
| 1.825 | -0.84 | 0.56 P6304QGR  | Guanine nucleotide-binding protein (G <i>i</i> ) subunit alpha isoform shortGua             | Gnas        | 1400  | 22   | 20 | 14 | 53.6 | 49.5 | 39.3 | 45.663 | 0.0000 | 122.95   | 58442000  | 351   | 16.94 | 16.77 | 16.33 | 17.58 | 17.92 | 17.33 | 17.27 |
| 1.846 | -0.84 | 0.56 Q15843P29 | NEDD8                                                                                       | NEDD8       | 971   | 5    | 5  | 5  | 71.6 | 71.6 | 71.6 | 9.0714 | 0.0000 | 79.674   | 5518000   | 197   | 17.32 | 17.67 | 18.21 | 18.74 | 18.51 | 18.52 | 18.47 |
| 1.381 | -0.84 | 0.56 Q9D1H8    | 30S ribosomal protein L53, mitochondrial                                                    | Mplp53      | 4916  | 6    | 6  | 6  | 55.1 | 55.1 | 55.1 | 12.737 | 0.0000 | 41.869   | 9467000   | 103   | 15.08 | 15.47 | 15.63 | 15.76 | 16.68 | 16.60 | 15.91 |
| 0.963 | -0.85 | 0.56 Q9AR66    | Peptidyl-prolyl cis-trans isomerase C                                                       | Ppic        | 11    | 11   | 11 | 11 | 14.2 | 14.2 | 14.2 | 88.324 | 0.0000 | 32.054   | 14664000  | 169   | 15.11 | 15.57 | 15.63 | 16.43 | 16.32 | 17.05 | 16.88 |
| 1.277 | -0.85 | 0.56 Q9BVT9    | Protein containing UBX domain for GLUT4                                                     | Ubxp1       | 36    | 20   | 20 | 20 | 41.6 | 41.6 | 41.6 | 49.795 | 0.0000 | 92.229   | 37279000  | 251   | 16.12 | 16.38 | 17.00 | 17.61 | 17.51 | 18.13 | 18.09 |
| 1.479 | -0.85 | 0.56 P15920    | Lactylglutathione lyase                                                                     | Glo1        | 4535  | 11   | 11 | 11 | 64.1 | 64.1 | 64.1 | 20.809 | 0.0000 | 76.317   | 15534000  | 147   | 15.16 | 15.56 | 15.41 | 17.00 | 16.09 | 15.72 | 16.08 |
| 1.277 | -0.85 | 0.56 Q9D8V8    | V-type protein ATPase 116 kDa subunit a isoform 2                                           | Atp6v2a2    | 8033  | 5    | 5  | 5  | 6    | 6    | 6    | 98.144 | 0.0017 | 3.2905   | 150800    | 11    | 13.27 | 12.17 | 12.92 | 13.68 | 13.66 | 13.54 | 13.47 |
| 1.492 | -0.85 | 0.56 Q9D8V8    | Nuclear valcain-containing protein 1                                                        | Nvl         | 5184  | 10   | 10 | 10 | 17.1 | 17.1 | 17.1 | 94.475 | 0.0000 | 14.254   | 2254000   | 44    | 13.37 | 14.22 | 14.37 | 15.06 | 15.05 | 15.23 | 15.23 |
| 1.077 | -0.85 | 0.55 P58749    | Transmembrane 6 superfamily member 1                                                        | Tmem61      | 4     | 4    | 4  | 4  | 14.6 | 14.6 | 14.6 | 14.6   | 0.0000 | 6.3731   | 3126100   | 25    | 14.39 | 12.88 | 13.68 | 14.74 | 14.66 | 14.43 | 14.17 |
| 1.226 | -0.86 | 0.55 Q9R060    | Cytosolic Fe-S cluster assembly factor HUBP1                                                | Hubp1       | 5615  | 5    | 5  | 5  | 24.7 | 24.7 | 24.7 | 34.085 | 0.0000 | 6.3373   | 7161000   | 74    | 13.72 | 14.40 | 14.57 | 15.09 | 14.46 | 15.20 | 15.19 |
| 1.425 | -0.86 | 0.55 Q9BZ9R    | Uncharacterized protein C17orf85 homolog                                                    | Ucp1785     | 3318  | 12   | 12 | 12 | 19.7 | 19.7 | 19.7 | 70.042 | 0.0000 | 37.218   | 9236000   | 92    | 14.34 | 14.84 | 15.15 | 15.69 | 15.59 | 15.15 | 15.12 |
| 0.738 | -0.86 | 0.55 Q9S099    | Mitogen-activated protein kinase kinase kinase 5                                            | Map3k5      | 5     | 5    | 5  | 3  | 5.1  | 5.1  | 5.1  | 154.51 | 0.0000 | 10.878   | 168300    | 16    | 12.42 | 12.27 | 13.96 | 13.90 | 13.90 | 13.08 | 14.16 |
| 1.480 | -0.87 | 0.55 Q9CQV7    | Kinesin-like protein KIFC1                                                                  | Kifc1       | 55    | 9    | 9  | 9  | 38.6 | 38.6 | 38.6 | 14.102 | 0.0000 | 6.1791   | 2975000   | 17    | 14.03 | 13.91 | 13.82 | 14.62 | 14.59 | 14.59 | 14.59 |
| 0.724 | -0.87 | 0.55 P26187    | Methylated-DNA-protein-cysteine methyltransferase                                           | Mgmt        | 919   | 5    | 5  | 5  | 30.3 | 30.3 | 30.3 | 22.434 | 0.0000 | 10.916   | 3064900   | 53    | 13.16 | 13.95 | 13.27 | 15.04 | 13.02 | 14.76 | 14.50 |
| 2.311 | -0.87 | 0.55 Q61656    | Probable ATP-dependent RNA helicase DDX5                                                    | Ddx5        | 2321  | 57   | 57 | 57 | 68.4 | 68.4 | 68.4 | 69.289 | 0.0000 | 323.31   | 452770000 | 1632  | 17.67 | 18.33 | 18.27 | 19.12 | 19.21 | 18.89 | 19.14 |
| 1.713 | -0.87 | 0.55 Q14A4X    | Cytidyl deaminase kinase 12                                                                 | Cdk12       | 1787  | 5    | 4  | 4  | 5.1  | 4.6  | 4.6  | 163.68 | 0.0000 | 7.9156   | 2727200   | 48    | 12.92 | 13.34 | 13.10 | 14.57 | 13.71 | 13.81 | 13.66 |
| 1.048 | -0.87 | 0.55 Q9SKR2    | Leucine-rich repeat-containing protein 1                                                    | Lrrc1       | 2693  | 8    | 8  | 8  | 47.2 | 47.2 | 47.2 | 29.883 | 0.0000 | 27.9832  | 12489000  | 93    | 14.72 | 16.02 | 16.05 | 16.77 | 16.77 | 16.77 | 16.77 |
| 1.555 | -0.88 | 0.54 P70271    | PDZ and LIM domain protein 4                                                                | Pldm4       | 11453 | 11   | 11 | 11 | 45.2 | 45.2 | 45.2 | 35.556 | 0.0000 | 37.599   | 14391000  | 103   | 14.51 | 14.94 | 15.16 | 16.00 | 15.09 | 16.01 | 15.88 |
| 2.081 | -0.88 | 0.54 Q9CWE0    | Mitochondrial fission regulator 1-like                                                      | Mifrl1      | 4711  | 7    | 7  | 7  | 39.1 | 39.1 | 39.1 | 31.726 | 0.0000 | 21.674   | 6348400   | 92    | 13.94 | 14.11 | 15.41 | 15.28 | 14.99 | 14.57 | 15.42 |
| 1.632 | -0.88 | 0.54 Q7TPV4    | Myb-binding protein 1A                                                                      | Myb1p1a     | 2772  | 55   | 55 | 55 | 46.4 | 46.4 | 46.4 | 152.04 | 0.0000 | 323.31   | 14251000  | 1255  | 16.44 | 16.56 | 16.79 | 17.13 | 17.46 | 17.40 | 17.93 |
| 1.968 | -0.88 | 0.54 Q9D8B4    | Leucine-rich repeat-containing protein C10orf11 homolog                                     | C10orf11    | 9     | 9    | 9  | 9  | 38.6 | 38.6 | 38.6 | 14.102 | 0.0000 | 6.1791   | 2975000   | 17    | 14.03 | 13.91 | 13.82 | 14.62 | 14.59 | 14.59 | 14.59 |
| 1.094 | -0.88 | 0.54 Q9CFE4    | SCY-1 like protein 2                                                                        | Scy2        | 3483  | 16   | 16 | 16 | 29   | 29   | 29   | 103.32 | 0.0000 | 13.338   | 91517000  | 214   | 15.79 | 15.80 | 15.57 | 16.54 | 17.54 | 15.93 | 16.42 |
| 2.058 | -0.88 | 0.54 A2AAV5    | SH3 and PX domain-containing protein 2B                                                     | Sh3px2b2    | 14    | 23   | 23 | 23 | 35.4 | 35.4 | 35.4 | 101.52 | 0.0000 | 121.06   | 6517000   | 562   | 15.58 | 15.81 | 16.21 | 16.46 | 16.63 | 16.92 | 16.98 |
| 1.178 | -0.88 | 0.54 Q9CYH6    | Ribosome bi                                                                                 |             |       |      |    |    |      |      |      |        |        |          |           |       |       |       |       |       |       |       |       |

|       |       |      |        |                                                                                                                                               |             |      |      |      |      |        |       |       |         |        |        |           |     |       |       |       |       |       |       |       |
|-------|-------|------|--------|-----------------------------------------------------------------------------------------------------------------------------------------------|-------------|------|------|------|------|--------|-------|-------|---------|--------|--------|-----------|-----|-------|-------|-------|-------|-------|-------|-------|
| 2.317 | -0.99 | 0.50 | Q9Z277 | Tyrosine-protein kinase BAZ1B                                                                                                                 | Baz1b       | 5833 | 28   | 28   | 28   | 22     | 22    | 22    | 170.65  | 0.0000 | 95.075 | 34719000  | 273 | 15.43 | 15.72 | 16.05 | 16.56 | 16.60 | 16.65 | 17.08 |
| 0.939 | -0.99 | 0.50 | Q91YU8 | Suppressor of SWI4 1 homolog                                                                                                                  | Ppan        | 4181 | 7    | 7    | 7    | 16.8   | 16.8  | 16.8  | 52.755  | 0.0000 | 23.813 | 5831100   | 71  | 14.05 | 13.18 | 14.94 | 15.00 | 14.57 | 14.85 | 15.76 |
| 1.113 | -0.99 | 0.50 | Q8C170 | Leucine-rich repeat-containing protein 20                                                                                                     | Lrrc20      | 3542 | 5    | 5    | 5    | 39.7   | 39.7  | 39.7  | 20.809  | 0.0000 | 219.94 | 16508000  | 76  | 15.34 | 16.59 | 16.38 | 17.02 | 17.43 | 16.39 | 17.54 |
| 2.847 | -0.99 | 0.50 | P63260 | Actin, cytoplasmic 2                                                                                                                          | Acta1       | 1499 | 59   | 4    | 3    | 99.5   | 7.5   | 7.5   | 41.792  | 0.0000 | 312.15 | 46731000  | 571 | 21.31 | 21.47 | 21.15 | 22.49 | 22.10 | 22.52 | 22.11 |
| 1.577 | -0.99 | 0.50 | Q08563 | Actin, cytoplasmic subunit 4                                                                                                                  | Acta1       | 2741 | 1    | 1    | 1    | 52.65  | 25.94 | 25.94 | 21.005  | 0.0000 | 323.31 | 64252000  | 294 | 17.57 | 17.71 | 16.37 | 17.71 | 16.37 | 17.71 | 16.37 |
| 1.529 | -1.00 | 0.50 | Q9NZN0 | RNA-binding protein 2                                                                                                                         | Rbm26       | 2548 | 12   | 12   | 12   | 14.7   | 14.7  | 14.7  | 114.14  | 0.0000 | 37.989 | 6878900   | 94  | 13.80 | 13.17 | 14.37 | 14.52 | 14.60 | 15.40 | 15.31 |
| 0.996 | -1.00 | 0.50 | Q9CR70 | EKC/KOOPS complex subunit Lage3                                                                                                               | Lage3       | 4678 | 2    | 2    | 2    | 20.3   | 20.3  | 20.3  | 15.824  | 0.0000 | 165.67 | 5942800   | 53  | 13.64 | 13.87 | 13.82 | 15.25 | 15.15 | 15.17 | 13.52 |
| 1.854 | -1.00 | 0.50 | P41105 | 60S ribosomal protein L28                                                                                                                     | Rpl28       | 1065 | 19   | 2    | 19   | 67.2   | 67.2  | 67.2  | 15.733  | 0.0000 | 179.58 | 410520000 | 646 | 17.97 | 18.89 | 19.04 | 19.41 | 19.64 | 19.44 | 19.65 |
| 1.708 | -1.00 | 0.50 | P63213 | Guanine nucleotide-binding protein G(i)/G(s)/G(o) subunit gamma-2                                                                             | Gng2        | 1496 | 11   | 11   | 11   | 84.5   | 84.5  | 84.5  | 7.8501  | 0.0000 | 63.74  | 142420000 | 385 | 18.65 | 18.71 | 18.61 | 19.77 | 19.85 | 20.04 | 20.32 |
| 0.918 | -1.01 | 0.50 | Q9Z1W0 | Charged multivesicular body protein 1a                                                                                                        | Chmp1a      | 424  | 11   | 11   | 11   | 36.2   | 36.2  | 36.2  | 21.6071 | 0.0000 | 22.944 | 33733000  | 216 | 16.48 | 16.48 | 16.42 | 18.18 | 16.09 | 17.50 | 17.70 |
| 0.613 | -1.01 | 0.50 | E9P9V6 | Large subunit GTPase 1 homolog                                                                                                                | Lsg1        | 1995 | 17   | 17   | 17   | 30.6   | 30.6  | 30.6  | 73.156  | 0.0000 | 91.325 | 14075000  | 178 | 14.62 | 15.39 | 15.68 | 16.16 | 16.04 | 16.12 | 16.62 |
| 2.173 | -1.01 | 0.50 | Q9COA3 | Succinate dehydrogenase [ubiquinone] iron-sulfur subunit, mitochondrial                                                                       | Sdhb        | 4978 | 19   | 19   | 19   | 46.8   | 46.8  | 46.8  | 31.814  | 0.0000 | 97.322 | 131240000 | 571 | 17.30 | 16.98 | 17.39 | 18.72 | 18.12 | 18.17 | 17.92 |
| 1.512 | -1.01 | 0.50 | Q9Z172 | ES1 protein homolog, mitochondrial                                                                                                            | D10Jhu81e   | 4999 | 17   | 17   | 17   | 69.2   | 69.2  | 69.2  | 28.08   | 0.0000 | 238.25 | 92740000  | 461 | 16.66 | 17.14 | 17.98 | 18.28 | 18.08 | 18.28 | 18.47 |
| 3.177 | -1.01 | 0.50 | P0DN34 | Protein SOGA1;N-terminal form;C-terminal 80 kDa form                                                                                          | Soga1       | 713  | 4    | 4    | 4    | 49.1   | 49.1  | 49.1  | 6.954   | 0.0000 | 7.0288 | 30373000  | 97  | 17.51 | 17.98 | 17.81 | 18.92 | 17.88 | 18.63 | 18.79 |
| 1.103 | -1.02 | 0.49 | E1U8D0 | AB1 gene family member 3                                                                                                                      | Abi3        | 217  | 13   | 13   | 13   | 13.8   | 13.8  | 13.8  | 159.18  | 0.0000 | 85.544 | 5020500   | 63  | 13.14 | 13.01 | 13.46 | 13.42 | 13.93 | 14.32 | 15.21 |
| 2.056 | -1.02 | 0.49 | Q8BY21 | Small nuclear ribonucleoprotein Sm D2                                                                                                         | Snrpd2      | 3308 | 15   | 15   | 15   | 47.7   | 47.7  | 47.7  | 39.106  | 0.0000 | 189.5  | 28300000  | 245 | 16.44 | 16.55 | 16.84 | 18.19 | 17.41 | 17.47 | 17.44 |
| 2.113 | -1.02 | 0.49 | P62317 | WD repeat-containing protein 7                                                                                                                | Wdr70       | 2594 | 7    | 7    | 7    | 77.9   | 77.9  | 77.9  | 10.214  | 0.0000 | 24.338 | 8532200   | 49  | 14.25 | 15.09 | 13.21 | 16.49 | 15.92 | 15.56 | 13.14 |
| 1.448 | -1.02 | 0.49 | Q3TWF6 | Wiskott-Aldrich syndrome protein family member 2                                                                                              | Wasf2       | 1881 | 8    | 8    | 8    | 15.7   | 15.7  | 15.7  | 73.118  | 0.0000 | 12.822 | 3230900   | 48  | 12.45 | 12.89 | 12.69 | 14.11 | 14.16 | 12.92 | 13.59 |
| 1.737 | -1.02 | 0.49 | Q8BH43 | Histone-lysine N-methyltransferase 2B                                                                                                         | Kmt2b       | 3009 | 25   | 25   | 25   | 37.8   | 37.8  | 37.8  | 54.073  | 0.0000 | 190.35 | 163500000 | 691 | 17.13 | 17.49 | 17.58 | 18.83 | 17.76 | 18.52 | 18.58 |
| 0.937 | -1.03 | 0.49 | Q08550 | BoA-like protein 2                                                                                                                            | Boia2       | 271  | 14   | 14   | 14   | 7.5    | 7.5   | 7.5   | 294.82  | 0.0000 | 71.898 | 13973000  | 74  | 15.87 | 15.57 | 14.36 | 16.11 | 16.30 | 15.62 | 17.14 |
| 0.460 | -1.03 | 0.49 | Q08G32 | 60S ribosomal protein L37                                                                                                                     | Rpl37       | 2594 | 6    | 6    | 6    | 52.6   | 52.6  | 52.6  | 11.078  | 0.0004 | 4.338  | 44877000  | 99  | 14.50 | 15.68 | 17.63 | 17.33 | 16.88 | 17.72 | 19.05 |
| 0.689 | -1.03 | 0.49 | Q9DB23 | 60S ribosomal protein L37                                                                                                                     | Rpl37       | 5047 | 6    | 6    | 6    | 52.6   | 52.6  | 52.6  | 11.078  | 0.0004 | 4.338  | 44877000  | 99  | 15.83 | 16.68 | 17.63 | 17.33 | 16.88 | 17.72 | 19.05 |
| 2.022 | -1.03 | 0.49 | Q8BV49 | Pyruvate dehydrogenase E1-pyruvate-binding domain-containing protein 1;Pyruvate dehydrogenase E1-pyruvate-binding domain-containing protein 1 | Pyhin1      | 3235 | 20   | 18   | 18   | 49     | 44    | 44    | 46.886  | 0.0000 | 24.377 | 51999000  | 321 | 14.52 | 14.65 | 14.94 | 15.76 | 16.19 | 15.23 | 15.75 |
| 0.874 | -1.03 | 0.49 | Q8BGA5 | KRR1 small subunit processome component homolog                                                                                               | Krr1        | 2970 | 8    | 8    | 8    | 30.3   | 30.3  | 30.3  | 43.537  | 0.0000 | 12.058 | 7852700   | 37  | 13.16 | 13.87 | 13.82 | 14.57 | 13.39 | 15.14 | 15.48 |
| 0.987 | -1.05 | 0.49 | Q7TND5 | Ribosome production factor 1                                                                                                                  | Rpf1        | 2760 | 2    | 2    | 2    | 11.5   | 11.5  | 11.5  | 40.036  | 0.0000 | 11.602 | 8805100   | 26  | 11.88 | 12.57 | 12.58 | 13.51 | 12.57 | 12.58 | 12.57 |
| 1.808 | -1.05 | 0.48 | A2AJL3 | FGF1 carboxylate kinase domain-containing protein                                                                                             | Fkbp1       | 45   | 30   | 2    | 2    | 5.8    | 5.8   | 5.8   | 6.336   | 0.0000 | 17.266 | 7074900   | 12  | 12.87 | 12.62 | 12.86 | 14.30 | 13.82 | 14.32 | 13.65 |
| 0.896 | -1.05 | 0.48 | Q9GMO1 | Phenylalanine--RNA ligase, mitochondrial                                                                                                      | Fars2       | 4450 | 3    | 3    | 3    | 12.2   | 12.2  | 12.2  | 52.336  | 0.0000 | 12.751 | 8859500   | 17  | 12.99 | 12.64 | 12.81 | 14.27 | 14.89 | 12.64 | 13.55 |
| 2.180 | -1.05 | 0.48 | P63280 | PE3;SUMO-conjugating enzyme UBC9                                                                                                              | Ube2i,UBE2I | 1502 | 8    | 8    | 8    | 54.4   | 54.4  | 54.4  | 18.007  | 0.0000 | 213.83 | 46838000  | 170 | 17.29 | 17.26 | 16.88 | 18.60 | 17.49 | 17.18 | 18.27 |
| 1.091 | -1.06 | 0.48 | P43276 | Histone H1.5                                                                                                                                  | Hist1h1b    | 1089 | 25   | 15   | 14   | 49.8   | 31.8  | 31.8  | 22.576  | 0.0000 | 323.31 | 116650000 | 886 | 20.71 | 21.07 | 21.13 | 21.91 | 20.94 | 22.68 | 22.58 |
| 2.696 | -1.06 | 0.48 | Q3JQ47 | Pelargonidin H                                                                                                                                | Seb         | 2018 | 63.8 | 63.8 | 63.8 | 12.974 | 63.8  | 63.8  | 12.974  | 0.0000 | 11.58  | 6786300   | 156 | 16.35 | 15.35 | 14.84 | 16.35 | 15.35 | 14.84 | 16.35 |
| 1.471 | -1.06 | 0.48 | Q9D8C4 | Interferon-induced 35 kDa protein homolog                                                                                                     | Itf35       | 5059 | 13   | 13   | 13   | 60.5   | 60.5  | 60.5  | 31.875  | 0.0000 | 99.903 | 35767000  | 160 | 15.76 | 15.85 | 16.53 | 17.57 | 16.38 | 17.20 | 17.30 |
| 2.505 | -1.06 | 0.48 | Q61687 | Transcriptional regulator ATRX                                                                                                                | Atrx        | 2323 | 10   | 10   | 10   | 5.5    | 5.5   | 5.5   | 278.58  | 0.0000 | 41.829 | 6758200   | 107 | 13.92 | 13.63 | 13.86 | 14.86 | 14.86 | 14.90 | 14.84 |
| 0.268 | -1.06 | 0.48 | P02534 | Regulation of nuclear pre-mRNA domain-containing protein 2                                                                                    | Rnpd2       | 626  | 12   | 6    | 0    | 31.8   | 17.7  | 0     | 46.674  | 0.0000 | 20.705 | 1574900   | 12  | 13.33 | 13.42 | 13.58 | 12.65 | 13.33 | 16.55 | 13.49 |
| 2.598 | -1.07 | 0.48 | Q8XN16 | SAFB-like transcription modulator                                                                                                             | Stm         | 153  | 14   | 14   | 14   | 15     | 15    | 15    | 158.58  | 0.0000 | 103.42 | 12620000  | 15  | 14.00 | 14.09 | 14.23 | 15.67 | 14.00 | 15.11 | 14.00 |
| 1.504 | -1.07 | 0.48 | Q8CH25 | Transcription initiation factor TFIIID subunit 9                                                                                              | Taf9        | 3518 | 15   | 15   | 15   | 15.3   | 15.3  | 15.3  | 116.92  | 0.0000 | 42.657 | 21399000  | 178 | 14.80 | 15.71 | 15.69 | 15.90 | 16.36 | 16.86 | 16.74 |
| 2.276 | -1.07 | 0.48 | Q8V133 | Transcriptional repressor CTCF                                                                                                                | Ctcf        | 4026 | 7    | 7    | 7    | 37.1   | 37.1  | 37.1  | 28.979  | 0.0000 | 34.103 | 12557000  | 81  | 15.81 | 15.71 | 15.39 | 16.92 | 17.06 | 16.45 | 16.39 |
| 2.984 | -1.07 | 0.48 | Q61164 | Transcriptional repressor CTCF                                                                                                                | Ctcf        | 6    | 6    | 6    | 6    | 6.5    | 6.5   | 6.5   | 83.745  | 0.0000 | 61.987 | 13511000  | 134 | 15.49 | 15.62 | 15.64 | 16.41 | 16.51 | 16.72 | 16.99 |
| 1.07  | -1.07 | 0.48 | Q09D83 | Transcription factor U2AF 35 kDa subunit                                                                                                      | U2af1       | 505  | 10   | 10   | 10   | 56.9   | 56.9  | 56.9  | 27.819  | 0.0000 | 223.73 | 98165000  | 492 | 17.20 | 17.58 | 17.76 | 18.02 | 16.91 | 16.31 | 16.69 |
| 1.338 | -1.08 | 0.47 | P61255 | 60S ribosomal protein L26                                                                                                                     | Rpl26       | 1381 | 22   | 22   | 22   | 72.4   | 72.4  | 72.4  | 17.258  | 0.0000 | 142.62 | 375250000 | 869 | 17.84 | 18.43 | 19.11 | 19.18 | 19.24 | 19.57 | 20.17 |
| 1.680 | -1.08 | 0.47 | Q8CH18 | E1A-binding protein p400                                                                                                                      | Ep400       | 3524 | 10   | 10   | 10   | 5.1    | 5.1   | 5.1   | 337.18  | 0.0000 | 34.668 | 5846300   | 88  | 13.34 | 13.44 | 13.79 | 14.05 | 14.29 | 14.91 | 15.14 |
| 0.463 | -1.08 | 0.47 | P68871 | Hemoglobin subunit beta-LVV-hemophan-7.Spinorphin                                                                                             | HBB         | 1523 | 6    | 4    | 4    | 49.7   | 36.7  | 36.7  | 15.998  | 0.0000 | 15.978 | 3447700   | 35  | 13.91 | 14.47 | 13.08 | 17.23 | 14.63 | 13.34 | 14.40 |
| 3.014 | -1.08 | 0.47 | Q9D7A6 | Signal recognition particle 19 kDa protein                                                                                                    | Srp19       | 5024 | 4    | 4    | 4    | 33.3   | 33.3  | 33.3  | 16.191  | 0.0000 | 68.932 | 18853000  | 103 | 15.56 | 15.71 | 15.97 | 16.72 | 16.70 | 16.75 | 17.13 |
| 1.321 | -1.09 | 0.47 | Q9Z8M4 | 60S ribosomal protein L7/L14                                                                                                                  | Rpl7        | 5867 | 21   | 21   | 21   | 28.543 | 21.1  | 21.1  | 12.566  | 0.0000 | 67.054 | 69550000  | 68  | 13.33 | 13.33 | 13.34 | 14.73 | 13.34 | 14.83 | 14.83 |
| 2.684 | -1.09 | 0.47 | P55194 | SH3 domain-binding protein 1                                                                                                                  | Sh3bp1      | 1286 | 28   | 28   | 28   | 48.2   | 48.2  | 48.2  | 74.172  | 0.0000 | 61.841 | 123540000 | 719 | 16.86 | 17.22 | 17.58 | 18.17 | 18.38 | 18.28 | 18.42 |
| 2.074 | -1.10 | 0.47 | Q9Z266 | SNARE-associated protein Snapiin                                                                                                              | Snapiin     | 5832 | 6    | 6    | 6    | 72.8   | 72.8  | 72.8  | 14.904  | 0.0000 | 146.41 | 20095000  | 96  | 16.64 | 16.08 | 17.14 | 17.78 | 17.75 | 17.58 | 17.77 |
| 3.280 | -1.10 | 0.47 | P11293 | 60S ribosomal protein L13a                                                                                                                    | Rpl13a      | 844  | 22   | 22   | 22   | 70.4   | 70.4  | 70.4  | 23.464  | 0.0000 | 73.545 | 1717300   | 504 | 18.19 | 18.47 | 18.55 | 19.30 | 19.52 | 19.45 | 19.74 |
| 2.574 | -1.10 | 0.47 | P11247 | Myeloperoxidase heavy chain                                                                                                                   | Mpo         | 147  | 36   | 36   | 36   | 46.6   | 46.6  | 46.6  | 81.181  | 0.0000 | 320.36 | 16690000  | 698 | 17.34 | 17.07 | 17.37 | 18.02 | 16.91 | 16.31 | 16.69 |
| 2.683 | -1.10 | 0.47 | Q8R1G6 | PDZ and LIM domain protein 2                                                                                                                  | Pdlim2      | 3788 | 7    | 7    | 7    | 27.8   | 27.8  | 27.8  | 37.703  | 0.0000 | 94.347 | 13806000  | 142 | 15.27 | 15.54 | 14.87 | 16.50 | 16.31 | 16.12 | 16.39 |
| 2.005 | -1.11 | 0.46 | Q8BG30 | Negative elongation factor A                                                                                                                  | Nelfa       | 2961 | 16   | 16   | 16   | 46.2   | 46.2  | 46.2  | 57.584  | 0.0000 | 103.62 | 89515000  | 325 | 17.13 | 17.52 | 18.17 | 18.46 | 18.84 | 18.74 | 18.81 |
| 2.212 | -1.11 | 0.46 | Q3TAA7 | Serine/threonine-protein kinase 11-interacting protein                                                                                        | Skf11p      | 1813 | 6    | 6    | 6    | 8.1    | 8.1   | 8.1   | 118     | 0.0000 | 27.489 | 3748400   | 89  | 13.61 | 12.75 | 12.76 | 14.22 | 14.04 | 14.14 | 14.19 |
| 1.319 | -1.11 | 0.46 | Q7O591 | Protein phosphatase 2B                                                                                                                        | Ptpn22      | 5146 | 3    | 3    | 3    | 22.7   | 22.7  | 22.7  | 16.536  | 0.0000 | 11.828 | 28778000  | 38  | 14.44 |       |       |       |       |       |       |

|  |       |       |      |        |                                                                              |          |      |    |    |      |      |      |         |         |        |           |           |       |       |       |       |       |       |       |       |
|--|-------|-------|------|--------|------------------------------------------------------------------------------|----------|------|----|----|------|------|------|---------|---------|--------|-----------|-----------|-------|-------|-------|-------|-------|-------|-------|-------|
|  | 1.700 | -1.25 | 0.42 | P61804 | Dolichyl-diphosphooligosaccharide-protein glycosyltransferase subunit D/Dad1 | 1390     | 2    | 2  | 2  | 19.5 | 19.5 | 19.5 | 12.497  | 0.0002  | 6.0643 | 7126900   | 46        | 16.46 | 16.26 | 15.68 | 16.80 | 18.09 | 17.39 | 17.34 |       |
|  | 1.794 | -1.25 | 0.42 | Q9C269 | CKLF-like MARVEL transmembrane domain-containing protein 6                   | Ctmn6    | 4819 | 2  | 2  | 2    | 15.8 | 15.8 | 15.8    | 19.824  | 0.0004 | 5.1288    | 2450600   | 18    | 14.14 | 13.06 | 14.34 | 15.13 | 15.36 | 14.97 | 14.94 |
|  | 1.326 | -1.25 | 0.42 | Q9CPR4 | 60S ribosomal protein L17                                                    | Rpl17    | 4529 | 20 | 20 | 20   | 66.8 | 66.8 | 66.8    | 21.824  | 0.0000 | 323.31    | 412650000 | 1012  | 17.13 | 18.87 | 19.51 | 19.76 | 19.87 | 19.72 | 20.61 |
|  | 2.279 | -1.25 | 0.42 | Q3JH06 | Ras-responsive element-binding protein 1                                     | Rreb1    | 1965 | 7  | 7  | 7    | 8.3  | 8.3  | 8.3     | 184.15  | 0.0000 | 14.317    | 1751200   | 31    | 12.81 | 12.21 | 12.11 | 13.71 | 14.03 | 13.54 | 13.25 |
|  | 2.759 | -1.25 | 0.41 | Q9B9R4 | 60S ribosomal protein L17, mitochondrial                                     | Hrpl17   | 5081 | 8  | 8  | 8    | 45.5 | 45.5 | 45.5    | 20.2401 | 0.0000 | 5.132     | 15890000  | 137   | 15.13 | 15.62 | 15.39 | 15.53 | 15.62 | 15.19 | 16.19 |
|  | 0.864 | -1.26 | 0.42 | A2RTL5 | Arginine/serine-rich coiled-coil protein 2                                   | Rsrc2    | 50   | 5  | 5  | 5    | 28.2 | 28.2 | 43.876  | 0.0000  | 14.147 | 4303000   | 27        | 12.91 | 14.82 | 13.74 | 15.63 | 13.75 | 15.71 | 15.24 |       |
|  | 3.217 | -1.26 | 0.42 | Q9RLX0 | Protein deglycase DJ-1                                                       | Park7    | 4448 | 19 | 19 | 19   | 95.2 | 95.2 | 95.2    | 20.021  | 0.0000 | 306.51    | 181220000 | 865   | 17.48 | 17.79 | 18.11 | 19.11 | 19.11 | 18.89 | 19.12 |
|  | 0.994 | -1.27 | 0.42 | Q8C863 | E3 ubiquitin-protein ligase Itch                                             | Itch     | 3421 | 8  | 8  | 8    | 9.6  | 9.6  | 9.6     | 98.992  | 0.0000 | 13.775    | 14759000  | 108   | 15.95 | 15.35 | 16.10 | 17.38 | 18.36 | 16.49 | 16.06 |
|  | 2.419 | -1.27 | 0.42 | Q8OJ72 | Protein scribble homolog                                                     | Scrib    | 2823 | 21 | 21 | 21   | 20.9 | 20.9 | 174.06  | 0.0000  | 89.354 | 18111000  | 222       | 14.26 | 14.51 | 14.86 | 15.80 | 15.95 | 15.47 | 16.23 |       |
|  | 3.044 | -1.27 | 0.41 | P03921 | NADH-ubiquinone oxidoreductase chain 5                                       | Ntnd5    | 631  | 2  | 2  | 2    | 5.4  | 5.4  | 5.4     | 68.474  | 0.0002 | 5.8973    | 773600    | 8     | 12.37 | 12.22 | 12.14 | 13.51 | 13.39 | 13.45 | 13.91 |
|  | 2.516 | -1.27 | 0.41 | Q8JY72 | COMM domain-containing protein 10                                            | Comm10   | 3587 | 6  | 6  | 6    | 35.1 | 35.1 | 22.812  | 0.0000  | 13.434 | 1217000   | 77        | 15.26 | 15.51 | 16.06 | 16.96 | 17.15 | 16.71 | 16.69 |       |
|  | 1.625 | -1.27 | 0.41 | P47911 | 60S ribosomal protein L6                                                     | Rpl6     | 1129 | 28 | 28 | 28   | 57.4 | 57.4 | 57.4    | 33.509  | 0.0000 | 323.31    | 354020000 | 898   | 17.99 | 18.45 | 19.14 | 19.25 | 19.67 | 19.90 | 20.38 |
|  | 1.046 | -1.27 | 0.41 | Q9RL28 | Probable ribosome biogenesis protein RLP24                                   | Rlp24d1  | 4406 | 6  | 6  | 6    | 33.1 | 33.1 | 33.1    | 19.611  | 0.0000 | 8.364     | 5812000   | 49    | 13.25 | 14.11 | 15.56 | 15.06 | 15.98 | 15.60 | 15.68 |
|  | 3.030 | -1.28 | 0.41 | Q9COT5 | NADH dehydrogenase [ubiquinone] 1 alpha subcomplex subunit 2                 | Ndub2    | 4570 | 5  | 5  | 5    | 39.4 | 39.4 | 39.4    | 10.916  | 0.0000 | 31.991    | 4327000   | 92    | 16.81 | 17.03 | 17.37 | 18.50 | 18.23 | 18.13 | 18.55 |
|  | 2.793 | -1.29 | 0.41 | O70200 | Allograft inflammatory factor 1                                              | Aif1     | 477  | 5  | 5  | 5    | 37.4 | 37.4 | 37.4    | 16.91   | 0.0000 | 33.897    | 5939900   | 53    | 12.76 | 13.55 | 13.44 | 14.61 | 14.52 | 14.48 | 14.53 |
|  | 1.846 | -1.29 | 0.41 | Q80TE0 | RNA polymerase II-associated protein 1                                       | Rpap1    | 2802 | 7  | 7  | 7    | 6.7  | 6.7  | 155.27  | 0.0000  | 47.053 | 4565600   | 58        | 13.80 | 13.99 | 14.49 | 15.72 | 15.71 | 14.63 | 15.45 |       |
|  | 2.089 | -1.29 | 0.41 | Q0P678 | Zinc finger CCHC domain-containing protein 18                                | Zc3h18   | 1776 | 5  | 5  | 5    | 6.2  | 6.2  | 105.69  | 0.0000  | 15.371 | 2654300   | 31        | 12.14 | 12.81 | 12.62 | 14.18 | 13.25 | 13.70 | 14.12 |       |
|  | 1.023 | -1.31 | 0.40 | P58469 | Protein FAM207A                                                              | Fam207a  | 1317 | 9  | 9  | 9    | 47   | 47   | 24.814  | 0.0000  | 20.39  | 12197000  | 76        | 13.31 | 15.13 | 14.16 | 15.39 | 14.47 | 16.47 | 16.03 |       |
|  | 1.448 | -1.31 | 0.40 | P47964 | 60S ribosomal protein L36                                                    | Rpl36    | 1136 | 10 | 10 | 10   | 40   | 40   | 12.215  | 0.0000  | 37.347 | 520770000 | 803       | 18.17 | 19.89 | 19.88 | 20.10 | 20.05 | 20.38 | 20.78 |       |
|  | 1.121 | -1.31 | 0.40 | Q9ERU3 | Zinc finger protein 22                                                       | Znf22    | 5319 | 5  | 5  | 5    | 20.3 | 20.3 | 27.294  | 0.0000  | 16.706 | 8865300   | 94        | 13.07 | 14.24 | 15.29 | 15.17 | 15.47 | 15.33 | 16.08 |       |
|  | 2.458 | -1.31 | 0.40 | Q3TEA8 | Heterochromatin protein 1-binding protein 3                                  | Hp1bp3   | 1836 | 28 | 28 | 28   | 47.8 | 47.8 | 60.866  | 0.0000  | 184.22 | 116900000 | 565       | 16.80 | 17.01 | 17.30 | 18.19 | 17.90 | 18.64 | 18.88 |       |
|  | 2.624 | -1.32 | 0.40 | Q9Z1P6 | NADH dehydrogenase [ubiquinone] 1 alpha subcomplex subunit 7                 | Ndub7    | 5816 | 9  | 9  | 9    | 78.8 | 78.8 | 12.575  | 0.0000  | 41.344 | 7102800   | 219       | 16.94 | 15.77 | 17.74 | 18.53 | 18.54 | 18.51 | 17.98 |       |
|  | 1.483 | -1.32 | 0.40 | Q8BIF9 | Zinc finger protein 787                                                      | Znf787   | 3057 | 5  | 5  | 5    | 4    | 4    | 16      | 0.0000  | 0.0000 | 0.0000    | 0.0000    | 17    | 12.67 | 12.36 | 12.88 | 13.57 | 13.57 | 15.05 | 13.67 |
|  | 0.652 | -1.32 | 0.40 | Q9UL95 | Proteoglycan 3                                                               | Prg3     | 5474 | 4  | 4  | 4    | 18.9 | 18.9 | 18.9    | 25.204  | 0.0000 | 6.9152    | 7877100   | 36    | 16.14 | 14.02 | 15.38 | 15.72 | 15.13 | 17.02 | 18.14 |
|  | 2.118 | -1.33 | 0.40 | Q8R3Y5 | Uncharacterized protein C19orf47 homolog                                     | Cmc1     | 3859 | 10 | 10 | 10   | 28.8 | 28.8 | 28.8    | 44.41   | 0.0000 | 11.521    | 29519000  | 206   | 15.59 | 16.36 | 16.69 | 17.47 | 17.34 | 17.47 | 17.90 |
|  | 0.629 | -1.34 | 0.40 | Q9C2F8 | COX assembly mitochondrial protein homolog                                   | Cmc1     | 3859 | 10 | 10 | 10   | 28.8 | 28.8 | 28.8    | 44.41   | 0.0000 | 11.521    | 29519000  | 206   | 15.59 | 16.36 | 16.69 | 17.47 | 17.34 | 17.47 | 17.90 |
|  | 1.738 | -1.34 | 0.39 | P27763 | Histone H2AX                                                                 | H2afx    | 811  | 21 | 21 | 21   | 8.3  | 8.3  | 12.543  | 0.0000  | 3.3316 | 4107800   | 31        | 12.54 | 13.90 | 14.46 | 16.00 | 15.65 | 15.43 | 16.03 |       |
|  | 3.372 | -1.35 | 0.39 | Q9Z289 | Ribosomal protein S6 kinase alpha-4                                          | Rps6ka4  | 5838 | 11 | 11 | 11   | 18.6 | 18.6 | 18.6    | 85.651  | 0.0000 | 24.323    | 13469000  | 103   | 15.34 | 15.70 | 15.14 | 16.83 | 16.77 | 16.87 | 16.52 |
|  | 2.224 | -1.36 | 0.39 | P62984 | Ubiquitin-60S ribosomal protein L40;Ubiquitin-60S ribosomal protein L40      | Uba52    | 1475 | 17 | 4  | 4    | 75   | 18.8 | 18.8    | 14.728  | 0.0000 | 46.761    | 67583000  | 342   | 16.46 | 16.92 | 17.49 | 18.44 | 17.92 | 18.34 | 18.54 |
|  | 1.105 | -1.36 | 0.39 | Q91V81 | RNA-binding protein 42                                                       | Rbm42    | 1125 | 11 | 11 | 11   | 30.5 | 30.5 | 50.235  | 0.0000  | 106.91 | 23497000  | 141       | 13.98 | 15.85 | 16.35 | 16.44 | 16.86 | 16.78 | 16.91 |       |
|  | 1.695 | -1.36 | 0.39 | P15864 | Histone H1.2                                                                 | Hist1h12 | 801  | 28 | 10 | 10   | 61.3 | 61.3 | 21.2661 | 0.0000  | 214.81 | 290320000 | 1845      | 21.52 | 18.57 | 22.23 | 19.57 | 22.62 | 23.13 | 23.42 |       |
|  | 1.124 | -1.36 | 0.39 | Q8K382 | DENM domain-containing protein 1A                                            | Denn1a   | 3694 | 10 | 10 | 10   | 14.4 | 14.4 | 111.54  | 0.0000  | 31.938 | 7131300   | 45        | 13.69 | 13.67 | 13.91 | 14.66 | 16.44 | 14.05 | 15.31 |       |
|  | 1.022 | -1.36 | 0.39 | P69905 | Hemoglobin subunit alpha                                                     | HBA1     | 1525 | 6  | 2  | 2    | 42.3 | 18.3 | 15.257  | 0.0002  | 5.3565 | 1957500   | 15        | 12.50 | 12.25 | 14.22 | 14.96 | 15.18 | 13.56 | 14.10 |       |
|  | 1.890 | -1.37 | 0.39 | Q6NZF1 | Zinc finger CCHC domain-containing protein 11A                               | Zc3h11a  | 2545 | 13 | 13 | 13   | 22.3 | 22.3 | 68.491  | 0.0000  | 25.911 | 10862000  | 127       | 13.34 | 13.89 | 14.42 | 14.99 | 14.79 | 15.55 | 15.66 |       |
|  | 0.553 | -1.37 | 0.39 | Q9C2P5 | Oromucoid protein 3                                                          | Oromuc3  | 91   | 1  | 1  | 1    | 9.8  | 9.8  | 9.8     | 0.0000  | 0.0000 | 0.0000    | 0.0000    | 17    | 13.41 | 15.50 | 15.48 | 16.56 | 16.35 | 16.54 | 16.98 |
|  | 1.432 | -1.37 | 0.39 | Q09111 | NADH dehydrogenase [ubiquinone] 1 beta subcomplex subunit 11, mitochondrion  | Ndub11   | 324  | 5  | 5  | 5    | 28.5 | 28.5 | 28.5    | 17.444  | 0.0000 | 47.051    | 13132000  | 58    | 15.17 | 15.66 | 15.10 | 16.56 | 17.21 | 17.31 | 15.62 |
|  | 5.045 | -1.38 | 0.39 | O54824 | Pro-interleukin-16;Interleukin-16                                            | Il16     | 425  | 12 | 12 | 12   | 11   | 11   | 141.43  | 0.0000  | 59.488 | 14793000  | 149       | 16.88 | 14.92 | 14.88 | 16.36 | 15.15 | 16.17 | 16.39 |       |
|  | 2.010 | -1.38 | 0.38 | P43274 | Histone H1.4                                                                 | Hist1h1e | 1087 | 27 | 13 | 7    | 57.5 | 38.4 | 20.1    | 21.977  | 0.0000 | 147.02    | 135960000 | 852   | 20.97 | 21.46 | 21.58 | 22.40 | 22.18 | 23.18 | 23.14 |
|  | 1.340 | -1.40 | 0.38 | Q9C937 | Uncharacterized protein C11orf88 homolog                                     | C11orf88 | 506  | 6  | 6  | 6    | 41.5 | 41.5 | 14.098  | 0.0000  | 14.513 | 16938000  | 63        | 14.94 | 15.77 | 15.15 | 16.86 | 16.46 | 16.50 | 17.12 |       |
|  | 1.316 | -1.40 | 0.38 | Q9CYV6 | Ubiquitin-cytochrome-c reductase complex assembly factor 2                   | Uqc2     | 4649 | 3  | 3  | 3    | 27.9 | 27.9 | 16.32   | 0.0000  | 15.97  | 7918300   | 63        | 15.83 | 16.17 | 14.13 | 16.63 | 16.96 | 16.60 | 16.90 |       |
|  | 1.355 | -1.40 | 0.38 | Q8BHQ9 | CGG triplet repeat-binding protein 1                                         | Cgblp1   | 3038 | 7  | 7  | 7    | 37.1 | 37.1 | 18.761  | 0.0000  | 16.899 | 5715400   | 47        | 13.76 | 15.26 | 13.35 | 15.57 | 15.07 | 15.61 | 15.87 |       |
|  | 0.911 | -1.42 | 0.37 | Q67341 | Tumor suppressor candidate gene 1 protein homolog                            | Tusc1    | 2469 | 4  | 4  | 4    | 18   | 18   | 22.712  | 0.0000  | 22.836 | 4551100   | 61        | 12.76 | 14.25 | 15.58 | 15.12 | 15.11 | 16.18 | 16.05 |       |
|  | 2.124 | -1.42 | 0.37 | Q8BG81 | Polymerase delta-interacting protein 3                                       | Pdip3    | 2966 | 16 | 16 | 16   | 47.4 | 47.4 | 46.132  | 0.0000  | 70.436 | 36759000  | 310       | 15.53 | 16.17 | 16.67 | 17.68 | 17.10 | 17.64 | 17.75 |       |
|  | 2.274 | -1.42 | 0.37 | Q27103 | Activity-dependent neuroprotector homeobox protein                           | Adnp     | 973  | 8  | 8  | 8    | 9.3  | 9.3  | 12.431  | 0.0000  | 9.0247 | 6307200   | 48        | 12.57 | 14.04 | 13.74 | 14.54 | 15.60 | 15.19 | 15.68 |       |
|  | 1.688 | -1.43 | 0.37 | P58059 | 28S ribosomal protein S21, mitochondrial                                     | Mps21    | 1964 | 4  | 4  | 4    | 49.4 | 49.4 | 10.561  | 0.0000  | 18.747 | 10140000  | 48        | 15.48 | 14.52 | 15.44 | 16.10 | 16.12 | 16.81 | 17.28 |       |
|  | 1.581 | -1.43 | 0.37 | P52760 | Ribonuclease UK114                                                           | Hrps12   | 1223 | 7  | 7  | 7    | 52.6 | 52.6 | 14.255  | 0.0000  | 23.684 | 16919000  | 86        | 16.43 | 15.96 | 16.71 | 18.11 | 18.64 | 17.07 | 17.37 |       |
|  | 1.394 | -1.43 | 0.37 | Q9RLD0 | HAUS augmin-like complex subunit 8                                           | Haus8    | 4401 | 5  | 5  | 5    | 17.7 | 17.7 | 41.653  | 0.0000  | 18.949 | 20719000  | 18        | 13.40 | 13.84 | 12.38 | 15.25 | 17.39 | 14.56 | 14.97 |       |
|  | 2.442 | -1.44 | 0.37 | Q35802 | Nuclear autoantigen Sp-100                                                   | Sp100    | 410  | 18 | 18 | 18   | 41.7 | 41.7 | 54.726  | 0.0000  | 125.74 | 33833000  | 1423      | 16.01 | 16.15 | 16.23 | 16.91 | 16.16 | 16.19 | 16.42 |       |
|  | 2.203 | -1.45 | 0.37 | P43277 | Histone H1.3                                                                 | Hist1h1d | 1090 | 27 | 3  | 3    | 57   | 9.5  | 22.099  | 0.0000  | 66.351 | 60019000  | 208       | 20.67 | 20.80 | 21.03 | 21.91 | 21.77 | 22.73 | 22.74 |       |
|  | 1.231 | -1.47 | 0.36 | Q8C989 | Death-inducible oligomer 1                                                   | Dido1    | 3424 | 10 | 10 | 9    | 6.9  | 6.9  | 247.17  | 0.0000  | 96.57  | 14676000  | 85        | 14.66 | 14.92 | 16.35 | 15.77 | 17.10 | 16.90 | 17.34 |       |
|  | 1.563 | -1.48 | 0.36 | P62754 | 40S ribosomal protein S16                                                    | Rps8     | 3443 | 33 | 33 | 33   | 69.5 | 69.5 | 28.68   | 0.0000  | 323.31 | 158350000 | 1973      | 19.64 | 20.00 | 21.48 | 22.10 | 22.26 | 21.73 | 22.41 |       |

|   |       |       |      |            |                                                                     |             |       |    |    |    |        |        |        |        |        |        |           |      |       |       |       |       |       |       |       |
|---|-------|-------|------|------------|---------------------------------------------------------------------|-------------|-------|----|----|----|--------|--------|--------|--------|--------|--------|-----------|------|-------|-------|-------|-------|-------|-------|-------|
| + | 1.954 | -2.73 | 0.15 | Q9CY57     | Chromatin target of PRMT1 protein                                   | Chtop       | 4786  | 8  | 8  | 8  | 34.1   | 34.1   | 34.1   | 26.585 | 0.0000 | 323.31 | 232390000 | 507  | 15.97 | 17.16 | 18.48 | 20.12 | 19.23 | 19.84 | 20.58 |
| + | 4.212 | -2.76 | 0.15 | Q9D168     | Integrator complex subunit 12                                       | Ints12      | 4898  | 4  | 4  | 4  | 11.9   | 11.9   | 11.9   | 48.588 | 0.0000 | 11.934 | 3405400   | 36   | 12.44 | 12.25 | 12.00 | 15.22 | 14.50 | 15.06 | 15.16 |
| + | 2.140 | -2.86 | 0.14 | Q91249     | UAP56-interacting factor                                            | Fytd1       | 4186  | 15 | 15 | 15 | 41     | 41     | 41     | 35.887 | 0.0000 | 119.67 | 28629000  | 182  | 12.68 | 13.46 | 14.88 | 16.26 | 16.10 | 16.32 | 17.47 |
| + | 1.738 | -4.04 | 0.06 | Q82803     | 14-3-3 protein sigma                                                | Sfn         | 1618  | 16 | 16 | 16 | 91.2   | 91.2   | 91.2   | 22.344 | 0.0000 | 238.41 | 41075000  | 123  | 11.37 | 11.66 | 14.84 | 17.03 | 15.50 | 15.94 | 18.20 |
| + | 2.013 | -4.35 | 0.05 | Q70456     | Acidic leucine-rich nuclear phosphoprotein 32 family member E       | Ans32e      | 4562  | 2  | 2  | 2  | 10.4   | 10.4   | 10.4   | 29.622 | 0.0000 | 24.04  | 4384600   | 57   | 14.04 | 15.28 | 13.07 | 13.27 | 15.46 | 13.26 | 16.36 |
| + | 1.384 | -1.42 | 0.37 | Q35892     | Nuclear autoantigen Sp-100                                          | Sp100       | 410   | 18 | 18 | 18 | 41.7   | 41.7   | 41.7   | 54.726 | 0.0000 | 125.74 | 33833000  | 183  | 14.87 | 15.09 | 16.23 | 16.56 | 16.31 | 16.73 | 17.53 |
| + | 1.899 | -1.42 | 0.37 | Q9DBY8     | Nuclear valosin-containing protein-like                             | Nvl         | 5184  | 10 | 10 | 10 | 17.1   | 17.1   | 17.1   | 94.475 | 0.0000 | 22.266 | 5254000   | 53   | 12.96 | 13.20 | 14.19 | 13.81 | 14.13 | 15.50 | 15.11 |
| + | 2.133 | -1.42 | 0.37 | Q9DRP9     | Ubiquitin carboxyl-terminal hydrolase isozyme L1                    | Uch1l       | 5635  | 6  | 6  | 6  | 36.8   | 36.8   | 36.8   | 24.838 | 0.0000 | 29.336 | 7707500   | 59   | 13.79 | 13.11 | 13.90 | 12.99 | 14.16 | 14.76 | 15.11 |
| + | 1.489 | -1.43 | 0.37 | P11352     | Glutathione peroxidase 1                                            | Gpx1        | 7421  | 21 | 21 | 21 | 84.6   | 84.6   | 84.6   | 22.329 | 0.0000 | 323.31 | 503000000 | 763  | 12.87 | 13.95 | 19.81 | 16.54 | 19.81 | 21.57 | 21.60 |
| + | 1.895 | -1.44 | 0.37 | Q92903     | Probable rRNA-processing protein EBP2                               | Ebn1tp2     | 5088  | 11 | 11 | 11 | 42.2   | 42.2   | 42.2   | 34.702 | 0.0000 | 46.653 | 7782000   | 64   | 13.55 | 15.14 | 14.87 | 14.24 | 16.21 | 15.41 | 15.68 |
| + | 3.192 | -1.44 | 0.37 | Q9CR57     | 60S ribosomal protein L14                                           | Rpl14       | 4669  | 20 | 20 | 20 | 64.5   | 64.5   | 64.5   | 23.564 | 0.0000 | 66.091 | 295890000 | 848  | 18.77 | 19.05 | 18.36 | 19.26 | 20.23 | 20.44 | 20.03 |
| + | 0.706 | -1.46 | 0.36 | P15252     | Syntaxin-17                                                         | Sxt17       | 7692  | 13 | 13 | 13 | 87     | 87     | 87     | 14.722 | 0.0000 | 104.74 | 19718000  | 60   | 11.13 | 11.97 | 12.42 | 10.01 | 15.35 | 12.49 | 11.69 |
| + | 0.955 | -1.46 | 0.36 | Q9D044     | Protein furry homolog                                               | Fry         | 4867  | 10 | 10 | 9  | 42.9   | 42.9   | 42.9   | 339.09 | 0.0002 | 5.5566 | 23739000  | 42   | 17.38 | 12.97 | 13.77 | 17.89 | 17.30 | 16.57 | 17.10 |
| + | 3.514 | -1.47 | 0.36 | Q91VE6     | Mki67 FHA domain-interacting nucleolar phosphoprotein               | Nlik        | 2459  | 8  | 8  | 8  | 39.4   | 39.4   | 39.4   | 36.265 | 0.0000 | 50.679 | 21264000  | 141  | 14.90 | 15.67 | 15.62 | 15.50 | 16.91 | 17.12 | 16.71 |
| + | 1.319 | -1.47 | 0.36 | Q9D7A6     | Signal recognition particle 19 kDa protein                          | Srp19       | 5024  | 4  | 4  | 4  | 33.3   | 33.3   | 33.3   | 16.191 | 0.0000 | 66.932 | 18853000  | 103  | 15.89 | 15.71 | 13.44 | 14.99 | 16.08 | 16.91 | 16.18 |
| + | 1.485 | -1.47 | 0.36 | Q9CY23     | GTP-binding protein 9                                               | Gtpb9       | 4781  | 3  | 3  | 3  | 17.5   | 17.5   | 17.5   | 31.872 | 0.0000 | 11.778 | 2525700   | 45   | 12.38 | 12.45 | 13.86 | 13.70 | 14.19 | 13.76 | 15.24 |
| + | 0.773 | -1.48 | 0.36 | P28151     | High affinity immunoglobulin gamma Fc receptor 1                    | Fcgr1       | 9128  | 10 | 10 | 10 | 24     | 24     | 24     | 44.887 | 0.0000 | 81.935 | 13880000  | 81   | 12.55 | 15.03 | 16.06 | 14.49 | 15.74 | 16.17 | 16.95 |
| + | 1.871 | -1.48 | 0.36 | P09926     | Surfact locus protein 2                                             | Surf2       | 9103  | 4  | 4  | 4  | 21     | 21     | 21     | 30.355 | 0.0000 | 22.456 | 6448800   | 43   | 13.59 | 14.70 | 15.25 | 14.07 | 16.13 | 15.46 | 16.40 |
| + | 1.110 | -1.48 | 0.36 | Q8CH02     | SURP and G-patch domain-containing protein 1                        | Supp1       | 3516  | 8  | 8  | 8  | 21.9   | 21.9   | 21.9   | 72.648 | 0.0000 | 26.703 | 2198500   | 28   | 12.48 | 13.87 | 12.45 | 11.87 | 15.02 | 13.99 | 12.84 |
| + | 1.791 | -1.48 | 0.36 | A2RTL5     | Arginine/serine-rich coiled-coil protein 2                          | Rsrc2       | 2808  | 5  | 5  | 5  | 28.2   | 28.2   | 28.2   | 43.676 | 0.0000 | 14.147 | 4303900   | 27   | 14.31 | 15.12 | 14.10 | 12.12 | 16.14 | 15.65 | 13.69 |
| + | 1.793 | -1.48 | 0.36 | P62242     | 40S ribosomal protein S8                                            | Rps8        | 14028 | 19 | 19 | 19 | 58.7   | 58.7   | 58.7   | 24.205 | 0.0000 | 276.68 | 296760000 | 814  | 13.11 | 19.44 | 17.50 | 19.15 | 20.35 | 20.26 | 20.05 |
| + | 1.457 | -1.49 | 0.36 | Q8CF66     | Regulator complex protein LAMTOR4:Regulator complex protein LAMTOR5 | Rpld4       | 3475  | 2  | 2  | 2  | 17.2   | 17.2   | 17.2   | 10.678 | 0.0020 | 3.0928 | 3666600   | 34   | 13.92 | 14.03 | 13.76 | 13.20 | 15.63 | 15.53 | 13.69 |
| + | 2.168 | -1.49 | 0.36 | Q81823     | Programmed cell death protein 4                                     | Pdcd4       | 2336  | 8  | 8  | 8  | 28.6   | 28.6   | 28.6   | 51.702 | 0.0000 | 13.578 | 4237700   | 30   | 13.31 | 14.00 | 13.01 | 12.74 | 14.48 | 14.46 | 15.49 |
| + | 1.944 | -1.49 | 0.36 | Q8BF72     | HAUS augmin-like complex subunit 4                                  | Haus4       | 2947  | 4  | 4  | 4  | 20.4   | 20.4   | 20.4   | 196    | 0.0000 | 38.432 | 42377700  | 24   | 13.31 | 13.76 | 13.01 | 14.14 | 14.58 | 14.87 | 13.01 |
| + | 1.013 | -1.49 | 0.36 | Q9QUR7     | Peptidyl-prolyl cis-trans isomerase NIMA-interacting 1              | Ppi1        | 5523  | 8  | 8  | 8  | 58.8   | 58.8   | 58.8   | 18.307 | 0.0000 | 85.988 | 14046000  | 171  | 14.26 | 15.11 | 11.98 | 14.02 | 15.35 | 15.11 | 15.06 |
| + | 1.248 | -1.50 | 0.35 | Q9D902     | General transcription factor IIE subunit 2                          | Gtlf2e      | 5087  | 11 | 11 | 11 | 47.3   | 47.3   | 47.3   | 33.046 | 0.0000 | 34.515 | 11253000  | 131  | 15.00 | 15.62 | 12.78 | 14.58 | 15.92 | 16.32 | 15.53 |
| + | 2.732 | -1.50 | 0.35 | P82858     | 40S ribosomal protein S28                                           | Rps28       | 1456  | 9  | 9  | 9  | 72.5   | 72.5   | 72.5   | 7.8409 | 0.0000 | 71.422 | 49709000  | 237  | 16.44 | 16.82 | 16.14 | 16.09 | 17.80 | 18.31 | 17.28 |
| + | 1.279 | -1.50 | 0.35 | P63166.P63 | Small ubiquitin-related modifier 1                                  | Sumo1.SUMO1 | 1494  | 6  | 6  | 6  | 53.5   | 53.5   | 53.5   | 7.167  | 0.0002 | 5.676  | 11621000  | 56   | 15.88 | 15.34 | 13.36 | 13.71 | 16.06 | 16.19 | 15.75 |
| + | 1.735 | -1.51 | 0.35 | P70721     | Surfactin DGCRA1                                                    | Surf1       | 4033  | 20 | 20 | 20 | 43.3   | 43.3   | 43.3   | 41.234 | 0.0000 | 46.758 | 21854000  | 157  | 15.75 | 15.98 | 17.04 | 15.98 | 17.45 | 16.82 | 16.86 |
| + | 1.684 | -1.51 | 0.35 | Q70729     | Surfactin DGCRA1                                                    | Dgcr14      | 1482  | 4  | 4  | 4  | 15     | 15     | 15     | 52.603 | 0.0000 | 56.808 | 4334900   | 85   | 13.72 | 15.19 | 13.40 | 13.77 | 15.24 | 15.96 | 14.91 |
| + | 4.272 | -1.52 | 0.35 | P62754     | 40S ribosomal protein S6                                            | Rps6        | 1443  | 33 | 33 | 33 | 69.5   | 69.5   | 69.5   | 26.68  | 0.0000 | 323.31 | 158350000 | 1973 | 20.98 | 21.24 | 21.00 | 21.11 | 22.24 | 22.87 | 22.57 |
| + | 1.780 | -1.52 | 0.35 | Q9CR47     | Ribosome biogenesis protein NSA2 homolog                            | Nsa2        | 4665  | 6  | 6  | 6  | 26.9   | 26.9   | 26.9   | 30.036 | 0.0027 | 2.698  | 2129900   | 13   | 13.26 | 12.61 | 13.57 | 13.47 | 17.76 | 15.61 | 14.42 |
| + | 1.555 | -1.52 | 0.35 | Q9DB58     | 40S ribosomal protein L4                                            | Rpl4        | 5061  | 44 | 44 | 44 | 64.4   | 64.4   | 64.4   | 47.153 | 0.0000 | 323.31 | 76648000  | 1738 | 15.56 | 15.95 | 20.39 | 16.30 | 19.61 | 19.57 | 19.68 |
| + | 2.183 | -1.53 | 0.35 | Q9CSN1     | SNW domain-containing protein 1                                     | Snw1        | 4699  | 23 | 23 | 23 | 53.4   | 53.4   | 53.4   | 61.475 | 0.0000 | 254.13 | 53849000  | 404  | 15.61 | 16.53 | 14.86 | 15.88 | 17.46 | 17.25 | 16.83 |
| + | 1.143 | -1.53 | 0.35 | P70721     | PDZ and LIM domain protein 4                                        | Pdlim4      | 1543  | 11 | 11 | 11 | 45.2   | 45.2   | 45.2   | 35.556 | 0.0000 | 37.599 | 14361000  | 103  | 15.46 | 15.65 | 13.03 | 15.48 | 16.96 | 16.90 | 15.64 |
| + | 1.354 | -1.53 | 0.35 | Q02257     | Junction plakoglobin                                                | Jup         | 1718  | 32 | 32 | 32 | 40.8   | 40.8   | 40.8   | 81.8   | 0.0000 | 288.43 | 118170000 | 652  | 15.84 | 17.22 | 17.57 | 15.67 | 18.10 | 18.78 | 17.09 |
| + | 2.832 | -1.53 | 0.35 | Q80T17     | Protein tyrosine demethylase PHF8                                   | Phf8        | 1787  | 8  | 8  | 8  | 8.7    | 8.7    | 8.7    | 115.59 | 0.0000 | 32.603 | 8244600   | 67   | 15.27 | 15.25 | 14.11 | 15.27 | 16.46 | 16.46 | 15.46 |
| + | 0.865 | -1.53 | 0.35 | P48282     | Natural resistance-associated macrophage protein 2                  | Slc11a2     | 1178  | 2  | 2  | 2  | 9      | 9      | 9      | 62.387 | 0.0000 | 35.014 | 3859200   | 37   | 13.00 | 14.62 | 13.68 | 13.65 | 15.49 | 15.73 | 16.91 |
| + | 1.486 | -1.54 | 0.34 | P59808     | SAM and SH3 domain-containing protein 1                             | Sash1       | 1345  | 21 | 21 | 20 | 26.4   | 26.4   | 26.4   | 135.59 | 0.0000 | 105.65 | 16689000  | 69   | 16.08 | 16.29 | 14.39 | 16.21 | 16.83 | 17.33 | 16.78 |
| + | 2.036 | -1.54 | 0.34 | Q8CHY6     | Transcriptional repressor p66 alpha                                 | Gata2a      | 3534  | 18 | 18 | 18 | 42.6   | 42.6   | 42.6   | 67.333 | 0.0000 | 195.05 | 30735000  | 377  | 14.41 | 15.25 | 13.62 | 15.11 | 15.72 | 16.41 | 16.05 |
| + | 2.751 | -1.54 | 0.34 | P19253     | 60S ribosomal protein L13a                                          | Rpl13a      | 844   | 22 | 22 | 22 | 70.4   | 70.4   | 70.4   | 23.464 | 0.0000 | 73.545 | 171710000 | 504  | 18.52 | 18.52 | 17.42 | 18.15 | 19.49 | 19.73 | 19.51 |
| + | 1.586 | -1.54 | 0.34 | Q9D882     | 60S ribosomal protein L27, mitochondrial                            | Rpl27       | 527   | 15 | 15 | 15 | 15.944 | 15.944 | 15.944 | 25.750 | 0.0000 | 35.442 | 28475000  | 165  | 14.84 | 16.03 | 17.16 | 14.84 | 17.27 | 16.47 | 17.08 |
| + | 1.882 | -1.55 | 0.34 | Q71FD5     | E3 ubiquitin-protein ligase ZNF22                                   | Znf22       | 2714  | 4  | 4  | 4  | 42.9   | 42.9   | 42.9   | 23.705 | 0.0000 | 45.245 | 6478700   | 87   | 14.26 | 13.59 | 13.34 | 13.74 | 15.43 | 15.72 | 15.73 |
| + | 2.083 | -1.55 | 0.34 | Q9CPT5     | Nucleolar protein 16                                                | Nop16       | 4534  | 15 | 15 | 15 | 69.1   | 69.1   | 69.1   | 21.139 | 0.0000 | 94.625 | 13615000  | 161  | 13.74 | 15.14 | 13.59 | 14.09 | 15.75 | 15.46 | 15.33 |
| + | 1.170 | -1.55 | 0.34 | Q91X66     | Guanine nucleotide exchange factor MSS4                             | Rabl        | 4138  | 3  | 3  | 3  | 28.5   | 28.5   | 28.5   | 13.915 | 0.0000 | 9.2748 | 4977000   | 46   | 13.54 | 15.74 | 13.92 | 14.28 | 15.65 | 15.71 | 14.62 |
| + | 0.434 | -1.55 | 0.34 | Q7TST1     | Desmoglein-1-beta:Desmoglein-1-alpha                                | Dsg1.bDsg1a | 2303  | 4  | 4  | 4  | 114.45 | 114.45 | 114.45 | 3.4    | 0.0000 | 9.9617 | 14194000  | 32   | 13.15 | 19.24 | 14.68 | 13.86 | 16.75 | 16.05 | 15.46 |
| + | 1.717 | -1.55 | 0.34 | Q9CYH6     | Ubiquitin-cytochrome-c reductase complex assembly factor 2          | Uqc2        | 4649  | 3  | 3  | 3  | 27.9   | 27.9   | 27.9   | 16.23  | 0.0000 | 15.97  | 7918300   | 63   | 15.14 | 15.74 | 15.08 | 13.66 | 16.19 | 16.92 | 16.04 |
| + | 0.661 | -1.55 | 0.34 | Q8BGH7     | CDC42 small effector protein 2                                      | Cdc42se2    | 2984  | 3  | 3  | 3  | 69     | 69     | 69     | 9.2234 | 0.0000 | 232.65 | 3279000   | 152  | 17.39 | 15.88 | 12.81 | 17.62 | 17.41 | 17.63 | 18.10 |
| + | 2.419 | -1.58 | 0.34 | Q81464     | Zinc finger protein 638                                             | Znf638      | 2302  | 17 | 17 | 17 | 17     | 12.4   | 12.4   | 218.13 | 0.0000 | 100.28 | 18872000  | 131  | 14.87 | 15.67 | 14.40 | 15.22 | 16.19 | 16.70 | 16.40 |
| + | 1.558 | -1.58 | 0.33 | P60960     | Protein tyrosine phosphatase Sec61 subunit gamma                    | Sed1g       | 1350  | 3  | 3  | 3  | 29.4   | 29.4   | 29.4   | 7.7412 | 0.0000 | 42.123 | 25863000  | 99   | 16.54 | 16.36 | 15.25 | 16.58 | 17.43 | 16.19 | 16.   |

|   |       |       |      |         |                                                                               |           |      |    |    |    |      |      |        |        |        |         |           |       |       |       |       |       |       |       |       |
|---|-------|-------|------|---------|-------------------------------------------------------------------------------|-----------|------|----|----|----|------|------|--------|--------|--------|---------|-----------|-------|-------|-------|-------|-------|-------|-------|-------|
|   | 1.011 | -1.88 | 0.27 | Q9ESP1  | Stromal cell-derived factor 2-like protein 1                                  | Sdf2l1    | 5341 | 4  | 4  | 4  | 23.5 | 23.5 | 23.5   | 23.648 | 0.0000 | 31.908  | 24058000  | 144   | 16.51 | 17.04 | 12.80 | 15.91 | 17.51 | 17.68 | 17.55 |
| + | 1.515 | -1.93 | 0.26 | Q99JH1  | Ribonuclease P protein subunit p25-like protein                               | Rpp25l    | 4339 | 6  | 6  | 6  | 46   | 46   | 46     | 17.675 | 0.0000 | 59.082  | 15898000  | 137   | 14.04 | 15.53 | 12.62 | 15.04 | 15.66 | 16.05 | 16.72 |
| + | 2.032 | -1.94 | 0.26 | EPV0V6  |                                                                               | Mki67     | 222  | 25 | 25 | 25 | 13.9 | 13.9 | 13.9   | 350.86 | 0.0000 | 96.347  | 14579000  | 96    | 15.27 | 16.16 | 14.47 | 14.17 | 16.76 | 17.37 | 16.33 |
| + | 1.756 | -1.94 | 0.26 | O54824  | Pro-interleukin-16/Interleukin-16                                             | Il16      | 425  | 12 | 12 | 12 | 11   | 11   | 11     | 141.43 | 0.0000 | 59.488  | 14793000  | 149   | 14.87 | 15.80 | 14.19 | 13.13 | 16.44 | 16.63 | 15.88 |
| + | 2.116 | -1.95 | 0.26 | Q8VB76  | Apoptosis protein B receptor                                                  | Apobor    | 3895 | 39 | 39 | 39 | 51.9 | 51.9 | 51.9   | 102.7  | 0.0000 | 323.31  | 94119000  | 764   | 15.36 | 15.95 | 14.64 | 16.30 | 16.86 | 17.64 | 17.16 |
| + | 2.589 | -1.95 | 0.26 | Q8BH09  | CGG triplet repeat-binding protein 1                                          | Cggtbp1   | 3038 | 7  | 7  | 7  | 37.1 | 37.1 | 37.1   | 18.761 | 0.0000 | 10.899  | 5715400   | 47    | 13.55 | 13.84 | 14.80 | 13.50 | 16.42 | 16.05 | 15.21 |
| + | 2.264 | -1.97 | 0.26 | Q9JMG1  | Endothelial differentiation-related factor 1                                  | Edf1      | 5509 | 10 | 10 | 10 | 68.9 | 68.9 | 68.9   | 16.369 | 0.0000 | 71.628  | 13406000  | 109   | 13.95 | 15.89 | 14.18 | 14.81 | 17.13 | 16.67 | 16.55 |
| + | 1.173 | -1.97 | 0.26 | P61961  | Ubiquitin-fold modifier 1                                                     | Ufm1      | 1393 | 3  | 3  | 3  | 63.5 | 63.5 | 63.5   | 9.1175 | 0.0000 | 153.92  | 16596000  | 86    | 16.23 | 16.94 | 12.94 | 15.04 | 16.91 | 17.33 | 17.42 |
| + | 1.695 | -1.98 | 0.25 | Q9CW93  | Probable ATP-dependent RNA helicase DDx47                                     | Ddx47     | 4737 | 6  | 6  | 6  | 17.6 | 17.6 | 17.6   | 50.638 | 0.0000 | 30.284  | 6940800   | 95    | 12.39 | 14.06 | 13.08 | 12.08 | 15.06 | 15.09 | 15.40 |
| + | 1.570 | -1.99 | 0.25 | Q3JUFM5 | Nuclear MIF4G domain-containing protein 1                                     | Ncm1      | 1956 | 8  | 8  | 8  | 10.9 | 10.9 | 10.9   | 95.959 | 0.0000 | 16.857  | 40228000  | 71    | 16.93 | 16.97 | 19.01 | 18.96 | 18.99 | 20.15 | 20.02 |
| + | 0.964 | -1.99 | 0.25 | Q9CR61  | NADH dehydrogenase [ubiquinone] 1 beta subcomplex subunit 7                   | Ndufb7    | 4673 | 4  | 4  | 4  | 45.3 | 45.3 | 45.3   | 16.331 | 0.0000 | 36.778  | 10809000  | 56    | 13.15 | 15.85 | 15.51 | 12.57 | 15.80 | 14.62 | 17.08 |
| + | 1.221 | -2.00 | 0.25 | Q8BH40  | INO80 complex subunit C                                                       | Ino80c    | 3025 | 5  | 5  | 5  | 40.3 | 40.3 | 40.3   | 20.405 | 0.0000 | 27.682  | 9126800   | 99    | 14.59 | 15.96 | 12.13 | 15.20 | 16.62 | 17.11 | 16.03 |
| + | 1.680 | -2.01 | 0.25 | Q8VD79  | 39S ribosomal protein L50, mitochondrial                                      | Mtpr50    | 3972 | 3  | 3  | 3  | 27   | 27   | 27     | 18.213 | 0.0000 | 12.972  | 6894500   | 80    | 14.06 | 15.96 | 13.72 | 12.74 | 16.43 | 16.13 | 15.23 |
| + | 0.528 | -2.01 | 0.25 | T070456 | 14-3-3 protein sigma                                                          | Sfn       | 501  | 16 | 11 | 11 | 52   | 45.2 | 45.2   | 27.708 | 0.0000 | 22.246  | 89331000  | 62    | 12.36 | 16.62 | 19.27 | 18.88 | 19.85 | 20.15 | 18.59 |
| + | 1.894 | -2.02 | 0.25 | Q8R2M2  | Deoxynucleotidyltransferase terminal-interacting protein 2                    | Dnttp2    | 3810 | 10 | 10 | 10 | 20.2 | 20.2 | 20.2   | 84.276 | 0.0000 | 23.759  | 8467700   | 52    | 13.47 | 15.77 | 14.13 | 13.87 | 16.79 | 16.36 | 15.54 |
| + | 2.261 | -2.03 | 0.24 | Q921W0  | Charged multivesicular body protein 1a                                        | Chmp1a    | 4242 | 11 | 11 | 11 | 36.2 | 36.2 | 36.2   | 21.607 | 0.0000 | 22.244  | 35753000  | 216   | 15.32 | 16.97 | 15.54 | 15.48 | 17.77 | 18.48 | 17.11 |
| + | 2.058 | -2.03 | 0.24 | Q9CRJ0  | Protein FAM32A                                                                | Fam32a    | 4680 | 8  | 8  | 8  | 57.1 | 57.1 | 57.1   | 13.215 | 0.0000 | 16.478  | 4103100   | 31    | 12.81 | 13.38 | 13.54 | 12.02 | 15.89 | 14.13 | 15.40 |
| + | 1.679 | -2.03 | 0.24 | Q9D1J3  | SAP domain-containing ribonucleoprotein                                       | Samp      | 4921 | 13 | 13 | 13 | 51.4 | 51.4 | 51.4   | 23.532 | 0.0000 | 266.03  | 67038000  | 429   | 15.73 | 17.15 | 14.01 | 15.75 | 18.02 | 17.68 | 17.40 |
| + | 1.461 | -2.04 | 0.24 | Q76KJ5  | DNA-directed RNA polymerase I subunit RPA34                                   | Cd3eap    | 2717 | 8  | 8  | 8  | 32.3 | 32.3 | 32.3   | 43.082 | 0.0000 | 32.675  | 6943900   | 62    | 14.00 | 15.80 | 14.39 | 12.30 | 16.69 | 16.00 | 15.75 |
| + | 1.364 | -2.05 | 0.24 | Q8CB99  | Active regulator of SIRT1                                                     | Rps19bp1  | 3404 | 5  | 5  | 5  | 38.5 | 38.5 | 38.5   | 15.977 | 0.0000 | 17.564  | 4708000   | 43    | 12.92 | 14.47 | 16.04 | 13.10 | 16.50 | 16.31 | 15.18 |
| + | 1.508 | -2.06 | 0.24 | B1AZP2  | Diska large-associated protein 4                                              | Dlgap4    | 76   | 7  | 7  | 7  | 9    | 9    | 9      | 108.04 | 0.0000 | 63.642  | 10870000  | 96    | 15.97 | 16.20 | 13.10 | 15.07 | 17.17 | 17.57 | 16.59 |
| + | 3.284 | -2.06 | 0.24 | Q8GGA5  | KRR1 small subunit processome component homolog                               | Krr1      | 2970 | 8  | 8  | 8  | 30.3 | 30.3 | 30.3   | 43.537 | 0.0000 | 12.056  | 7852700   | 37    | 13.84 | 13.87 | 14.06 | 14.47 | 15.70 | 16.90 | 16.07 |
| + | 1.322 | -2.07 | 0.24 | Q3V208  | NEDD4-binding protein 2-like 1                                                | N4bp2l1   | 2051 | 5  | 5  | 5  | 25.2 | 25.2 | 25.2   | 28.038 | 0.0000 | 11.997  | 34171000  | 54    | 16.97 | 18.62 | 15.12 | 17.84 | 18.13 | 19.62 | 19.55 |
| + | 2.322 | -2.09 | 0.23 | P0CG14  | Chromosome transmission fidelity protein 8 homolog isoform 2                  | Ctft8     | 709  | 12 | 12 | 12 | 36.2 | 36.2 | 36.2   | 52.244 | 0.0000 | 51.981  | 18686000  | 107   | 15.30 | 14.85 | 13.31 | 14.86 | 16.51 | 16.72 | 16.26 |
| + | 1.786 | -2.11 | 0.23 | P45878  | Peptidyl-prolyl cis-trans isomerase FKBP2                                     | Fkbp2     | 1099 | 3  | 3  | 3  | 14.3 | 14.3 | 14.3   | 15.344 | 0.0000 | 10.835  | 13885000  | 56    | 15.58 | 16.81 | 13.91 | 14.64 | 17.41 | 17.57 | 16.99 |
| + | 1.704 | -2.13 | 0.23 | Q8BZ99  | Uncharacterized protein C17orf85 homolog                                      |           | 3318 | 12 | 12 | 12 | 19.7 | 19.7 | 19.7   | 70.042 | 0.0000 | 37.218  | 9236000   | 92    | 14.17 | 15.47 | 13.13 | 12.68 | 15.61 | 16.28 | 15.47 |
| + | 0.349 | -2.15 | 0.23 | Q06830  | Peroxisomal protein                                                           | PRDX1     | 1752 | 18 | 6  | 4  | 69.3 | 32.2 | 23.1   | 22.11  | 0.0000 | 23.876  | 77696000  | 26    | 19.71 | 18.87 | 12.27 | 12.87 | 20.94 | 12.94 | 18.45 |
| + | 1.965 | -2.16 | 0.22 | Q8K003  | Translation machinery-associated protein 7                                    | Tma7      | 3590 | 7  | 6  | 6  | 53.1 | 40.6 | 40.6   | 7.0662 | 0.0000 | 11.939  | 25853000  | 94    | 15.07 | 16.55 | 14.21 | 14.48 | 18.06 | 16.91 | 17.19 |
| + | 1.046 | -2.21 | 0.22 | Q9D684  | Ras and Rab interactor 2                                                      | Rin2      | 4992 | 4  | 4  | 4  | 6.4  | 6.4  | 6.4    | 101.56 | 0.0018 | 3.1566  | 11166000  | 8     | 11.84 | 13.76 | 13.40 | 15.10 | 16.36 | 13.18 | 17.01 |
| + | 2.115 | -2.23 | 0.21 | Q8R1F0  | Leydig cell tumor 10 kDa protein homolog                                      | D8Erd738e | 3785 | 5  | 5  | 5  | 30.9 | 30.9 | 30.9   | 10.197 | 0.0004 | 4.7779  | 5324000   | 48    | 13.37 | 14.97 | 12.70 | 14.62 | 16.09 | 15.92 | 15.84 |
| + | 2.909 | -2.24 | 0.21 | Q9CPN8  | Insulin-like growth factor 2 mRNA-binding protein 3                           | Igf2bp3   | 4522 | 12 | 12 | 11 | 30.7 | 28.5 | 63.574 | 0.0000 | 35.384 | 7971800 | 81        | 13.66 | 13.36 | 14.23 | 13.27 | 15.41 | 15.25 | 16.63 |       |
| + | 1.024 | -2.24 | 0.21 | P31996  | Macrosialin                                                                   | Cd68      | 992  | 5  | 5  | 5  | 13.5 | 13.5 | 13.5   | 34.817 | 0.0002 | 6.0657  | 52814000  | 60    | 17.78 | 17.65 | 13.57 | 16.17 | 19.05 | 19.29 | 16.85 |
| + | 1.652 | -2.25 | 0.21 | Q9CPU9  | Probable low affinity copper uptake protein 2                                 | Slc31a2   | 4537 | 1  | 1  | 1  | 17.5 | 17.5 | 17.5   | 16.069 | 0.0000 | 54.272  | 8638300   | 66    | 12.22 | 15.43 | 14.24 | 12.82 | 16.03 | 16.21 | 15.94 |
| + | 3.380 | -2.27 | 0.21 | Q9VDI1  | Epithelial-stromal interaction protein 1                                      | Epsl1     | 3954 | 5  | 5  | 5  | 18.8 | 18.8 | 18.8   | 36.098 | 0.0000 | 11.815  | 3628100   | 30    | 12.39 | 12.96 | 13.27 | 13.38 | 15.01 | 14.88 | 15.25 |
| + | 1.120 | -2.27 | 0.21 | Q92266  | SNARE-associated protein Snapin                                               | Snapin    | 5832 | 6  | 6  | 6  | 72.8 | 72.8 | 72.8   | 14.904 | 0.0000 | 146.41  | 20095000  | 96    | 16.73 | 17.37 | 12.91 | 14.44 | 17.10 | 18.16 | 17.37 |
| + | 1.440 | -2.33 | 0.20 | Q9EP07  | STAR-related lipid transfer protein 5                                         | Star5     | 5261 | 6  | 6  | 6  | 30   | 30   | 30     | 23.922 | 0.0000 | 22.719  | 12724000  | 100   | 15.28 | 16.54 | 12.86 | 14.11 | 17.46 | 17.77 | 16.24 |
| + | 2.031 | -2.35 | 0.20 | Q9DB42  | Zinc finger protein 593                                                       | Znf593    | 5126 | 5  | 5  | 5  | 41   | 41   | 41     | 15.147 | 0.0000 | 23.496  | 7338400   | 70    | 13.11 | 15.80 | 14.81 | 14.22 | 16.76 | 17.28 | 16.10 |
| + | 3.711 | -2.37 | 0.19 | Q8R2K4  | TA6B-like RNA polymerase II p300/CBP-associated factor-associated factor 1afl | atfl      | 3808 | 3  | 3  | 3  | 6.7  | 6.7  | 6.7    | 67.235 | 0.0008 | 4.1507  | 2126400   | 16    | 13.08 | 12.56 | 13.17 | 13.69 | 15.22 | 16.03 | 15.43 |
| + | 1.897 | -2.41 | 0.19 | Q9CY57  | Chromatin target of PRMT1 protein                                             | Chtp      | 4786 | 8  | 8  | 8  | 34.1 | 34.1 | 34.1   | 26.585 | 0.0000 | 323.31  | 23239000  | 507   | 18.79 | 18.80 | 16.85 | 20.03 | 20.65 | 21.23 | 20.73 |
| + | 2.098 | -2.42 | 0.19 | Q9D773  | 39S ribosomal protein L2, mitochondrial                                       | Mtpr2     | 5021 | 12 | 12 | 12 | 43.8 | 43.8 | 43.8   | 33.34  | 0.0000 | 176     | 30239000  | 180   | 14.25 | 15.02 | 13.18 | 15.43 | 16.79 | 17.54 | 17.00 |
| + | 1.677 | -2.47 | 0.18 | Q9D937  | Uncharacterized protein C11orf88 homolog                                      |           | 5092 | 6  | 6  | 6  | 41.5 | 41.5 | 41.5   | 14.098 | 0.0000 | 14.513  | 16939000  | 108   | 13.98 | 15.65 | 12.52 | 15.85 | 17.07 | 17.00 | 16.57 |
| + | 3.939 | -2.51 | 0.18 | O80550  | Histone-lysine N-methyltransferase 2B                                         | Kmt2b     | 271  | 14 | 14 | 14 | 7.5  | 7.5  | 7.5    | 294.82 | 0.0000 | 71.898  | 13973000  | 74    | 14.27 | 14.67 | 14.75 | 14.98 | 16.64 | 16.90 | 17.63 |
| + | 1.839 | -2.61 | 0.16 | Q9N081  | 39S ribosomal protein L34, mitochondrial                                      | Mtpr34    | 4489 | 3  | 3  | 3  | 25   | 25   | 25     | 10.531 | 0.0004 | 4.6748  | 8182800   | 42    | 14.99 | 14.90 | 12.99 | 14.49 | 17.18 | 17.82 | 17.04 |
| + | 0.919 | -2.72 | 0.15 | Q9R107  | Proteolipid protein 2                                                         | Ptp2      | 5658 | 2  | 2  | 2  | 21.1 | 21.1 | 21.1   | 16.607 | 0.0000 | 34.638  | 71457000  | 118   | 18.70 | 19.47 | 12.75 | 16.87 | 19.37 | 19.76 | 19.76 |
| + | 0.690 | -2.75 | 0.15 | Q8CJ40  | Rootletin                                                                     | Crocc     | 3566 | 6  | 6  | 6  | 3    | 3    | 3      | 226.94 | 0.0044 | 2.4043  | 121400000 | 45    | 20.82 | 20.41 | 14.36 | 13.55 | 20.06 | 20.11 | 19.95 |
| + | 2.524 | -2.76 | 0.15 | Q9DC09  | Multifunctional methyltransferase subunit TRM112-like protein                 | Trmt112   | 5212 | 3  | 3  | 3  | 31.2 | 31.2 | 31.2   | 14.141 | 0.0000 | 9.6226  | 8907200   | 67    | 14.93 | 15.74 | 13.54 | 13.53 | 16.86 | 17.49 | 16.90 |
| + | 5.731 | -2.79 | 0.14 | P61166  | Transmembrane protein Z58                                                     | Tmem258   | 1374 | 2  | 2  | 2  | 10.1 | 10.1 | 10.1   | 9.0788 | 0.0009 | 3.658   | 3167600   | 28    | 13.11 | 13.78 | 13.20 | 12.33 | 16.10 | 16.27 | 16.18 |
| + | 1.844 | -2.83 | 0.14 | Q8K117  | WAS/WASL-interacting protein family member 1                                  | Wipr1     | 3628 | 10 | 10 | 10 | 24.9 | 24.9 | 24.9   | 50.08  | 0.0000 | 21.263  | 31171000  | 123   | 15.24 | 17.10 | 14.75 | 13.24 | 18.11 | 17.95 | 17.25 |
| + | 1.717 | -3.03 | 0.12 | Q8BSL7  | ADP-ribosylation factor 2                                                     | Arf2      | 3189 | 10 | 1  | 1  | 59.7 | 5.5  | 5.5    | 20.746 | 0.0048 | 2.3505  | 9208400   | 27    | 12.75 | 11.58 | 12.98 | 11.89 | 16.15 | 12.67 | 15.98 |
| + | 2.525 | -3.05 | 0.12 | Q91Z49  | UAP56-interacting factor                                                      | Fyttd1    | 4186 | 15 | 15 | 15 | 41   | 41   | 41     | 35.887 | 0.0000 | 119.67  | 28629000  | 182   | 13.72 | 15.03 | 13.83 | 16.28 | 17.44 | 18.19 | 17.39 |
| + | 1.32  |       |      |         |                                                                               |           |      |    |    |    |      |      |        |        |        |         |           |       |       |       |       |       |       |       |       |
